# Supplementary material for: A methodology for the design of experiments in computational intelligence with multiple regression models
Source: PeerJ. 2016 Dec 1;4:e2721. doi: 10.7717/peerj.2721 (PMC5136129; doi:10.7717/peerj.2721)
Supplement: Data S1 — Datailed results from UC Irvine Machine Learning Repository (Housing, Machine CPU, Wine Quality, Automobile and Parkinson) and the 3 Use Cases (Protein Corona, Gajewicz Metal Oxides and Aquatic Toxicity) [file peerj-04-2721-s001.zip]

Archive with 660 entries (639 files):
- 0_datasets/
- 0_datasets/.DS_Store
- __MACOSX/
- __MACOSX/0_datasets/
- __MACOSX/0_datasets/._.DS_Store
- 0_datasets/ds.automobile.csv
- 0_datasets/ds.gajewicz.csv
- 0_datasets/ds.Housing.csv
- 0_datasets/ds.MachineCPU.csv
- 0_datasets/ds.Parkinson.csv
- 0_datasets/ds.pcorona.csv
- 0_datasets/ds.toxicity.csv
- 0_datasets/ds.winequality-red.csv
- 0_datasets/Icon
- __MACOSX/0_datasets/._Icon
- __MACOSX/._0_datasets
- 1_housing/
- 1_housing/DifModels.R2.iSplits.1.pdf
- 1_housing/DifModels.R2.iSplits.10.pdf
- 1_housing/DifModels.R2.iSplits.2.pdf
- 1_housing/DifModels.R2.iSplits.3.pdf
- 1_housing/DifModels.R2.iSplits.4.pdf
- 1_housing/DifModels.R2.iSplits.5.pdf
- 1_housing/DifModels.R2.iSplits.6.pdf
- 1_housing/DifModels.R2.iSplits.7.pdf
- 1_housing/DifModels.R2.iSplits.8.pdf
- 1_housing/DifModels.R2.iSplits.9.pdf
- 1_housing/DifModels.RMSE.iSplits.1.pdf
- 1_housing/DifModels.RMSE.iSplits.10.pdf
- 1_housing/DifModels.RMSE.iSplits.2.pdf
- 1_housing/DifModels.RMSE.iSplits.3.pdf
- 1_housing/DifModels.RMSE.iSplits.4.pdf
- 1_housing/DifModels.RMSE.iSplits.5.pdf
- 1_housing/DifModels.RMSE.iSplits.6.pdf
- 1_housing/DifModels.RMSE.iSplits.7.pdf
- 1_housing/DifModels.RMSE.iSplits.8.pdf
- 1_housing/DifModels.RMSE.iSplits.9.pdf
- 1_housing/Icon
- __MACOSX/1_housing/
- __MACOSX/1_housing/._Icon
- 1_housing/ModelsComp.iSplits.1.pdf
- 1_housing/ModelsComp.iSplits.10.pdf
- 1_housing/ModelsComp.iSplits.2.pdf
- 1_housing/ModelsComp.iSplits.3.pdf
- 1_housing/ModelsComp.iSplits.4.pdf
- 1_housing/ModelsComp.iSplits.5.pdf
- 1_housing/ModelsComp.iSplits.6.pdf
- 1_housing/ModelsComp.iSplits.7.pdf
- 1_housing/ModelsComp.iSplits.8.pdf
- 1_housing/ModelsComp.iSplits.9.pdf
- 1_housing/Parameters.csv
- 1_housing/RRegrsResAllSplits.csv
- __MACOSX/1_housing/._RRegrsResAllSplits.csv
- 1_housing/RRegrsResBest.csv
- 1_housing/RRegrsResBest.csv.repeatedcv.split10.pdf
- 1_housing/RRegsResAvgs.csv
- __MACOSX/1_housing/._RRegsResAvgs.csv
- __MACOSX/._1_housing
- 2_machineCPU/
- 2_machineCPU/DifModels.R2.iSplits.1.pdf
- 2_machineCPU/DifModels.R2.iSplits.10.pdf
- 2_machineCPU/DifModels.R2.iSplits.2.pdf
- 2_machineCPU/DifModels.R2.iSplits.3.pdf
- 2_machineCPU/DifModels.R2.iSplits.4.pdf
- 2_machineCPU/DifModels.R2.iSplits.5.pdf
- 2_machineCPU/DifModels.R2.iSplits.6.pdf
- 2_machineCPU/DifModels.R2.iSplits.7.pdf
- 2_machineCPU/DifModels.R2.iSplits.8.pdf
- 2_machineCPU/DifModels.R2.iSplits.9.pdf
- 2_machineCPU/DifModels.RMSE.iSplits.1.pdf
- 2_machineCPU/DifModels.RMSE.iSplits.10.pdf
- 2_machineCPU/DifModels.RMSE.iSplits.2.pdf
- 2_machineCPU/DifModels.RMSE.iSplits.3.pdf
- 2_machineCPU/DifModels.RMSE.iSplits.4.pdf
- 2_machineCPU/DifModels.RMSE.iSplits.5.pdf
- 2_machineCPU/DifModels.RMSE.iSplits.6.pdf
- 2_machineCPU/DifModels.RMSE.iSplits.7.pdf
- 2_machineCPU/DifModels.RMSE.iSplits.8.pdf
- 2_machineCPU/DifModels.RMSE.iSplits.9.pdf
- 2_machineCPU/Icon
- __MACOSX/2_machineCPU/
- __MACOSX/2_machineCPU/._Icon
- 2_machineCPU/ModelsComp.iSplits.1.pdf
- 2_machineCPU/ModelsComp.iSplits.10.pdf
- 2_machineCPU/ModelsComp.iSplits.2.pdf
- 2_machineCPU/ModelsComp.iSplits.3.pdf
- 2_machineCPU/ModelsComp.iSplits.4.pdf
- 2_machineCPU/ModelsComp.iSplits.5.pdf
- 2_machineCPU/ModelsComp.iSplits.6.pdf
- 2_machineCPU/ModelsComp.iSplits.7.pdf
- 2_machineCPU/ModelsComp.iSplits.8.pdf
- 2_machineCPU/ModelsComp.iSplits.9.pdf
- 2_machineCPU/Parameters.csv
- 2_machineCPU/RRegrsResAllSplits.csv
- __MACOSX/2_machineCPU/._RRegrsResAllSplits.csv
- 2_machineCPU/RRegrsResBest.csv
- 2_machineCPU/RRegrsResBest.csv.repeatedcv.split10.pdf
- 2_machineCPU/RRegsResAvgs.csv
- __MACOSX/2_machineCPU/._RRegsResAvgs.csv
- __MACOSX/._2_machineCPU
- 3_winequality/
- 3_winequality/DifModels.R2.iSplits.1.pdf
- 3_winequality/DifModels.R2.iSplits.10.pdf
- 3_winequality/DifModels.R2.iSplits.2.pdf
- 3_winequality/DifModels.R2.iSplits.3.pdf
- 3_winequality/DifModels.R2.iSplits.4.pdf
- 3_winequality/DifModels.R2.iSplits.5.pdf
- 3_winequality/DifModels.R2.iSplits.6.pdf
- 3_winequality/DifModels.R2.iSplits.7.pdf
- 3_winequality/DifModels.R2.iSplits.8.pdf
- 3_winequality/DifModels.R2.iSplits.9.pdf
- 3_winequality/DifModels.RMSE.iSplits.1.pdf
- 3_winequality/DifModels.RMSE.iSplits.10.pdf
- 3_winequality/DifModels.RMSE.iSplits.2.pdf
- 3_winequality/DifModels.RMSE.iSplits.3.pdf
- 3_winequality/DifModels.RMSE.iSplits.4.pdf
- 3_winequality/DifModels.RMSE.iSplits.5.pdf
- 3_winequality/DifModels.RMSE.iSplits.6.pdf
- 3_winequality/DifModels.RMSE.iSplits.7.pdf
- 3_winequality/DifModels.RMSE.iSplits.8.pdf
- 3_winequality/DifModels.RMSE.iSplits.9.pdf
- 3_winequality/Icon
- __MACOSX/3_winequality/
- __MACOSX/3_winequality/._Icon
- 3_winequality/ModelsComp.iSplits.1.pdf
- 3_winequality/ModelsComp.iSplits.10.pdf
- 3_winequality/ModelsComp.iSplits.2.pdf
- 3_winequality/ModelsComp.iSplits.3.pdf
- 3_winequality/ModelsComp.iSplits.4.pdf
- 3_winequality/ModelsComp.iSplits.5.pdf
- 3_winequality/ModelsComp.iSplits.6.pdf
- 3_winequality/ModelsComp.iSplits.7.pdf
- 3_winequality/ModelsComp.iSplits.8.pdf
- 3_winequality/ModelsComp.iSplits.9.pdf
- 3_winequality/Parameters.csv
- 3_winequality/RRegrsResAllSplits.csv
- __MACOSX/3_winequality/._RRegrsResAllSplits.csv
- 3_winequality/RRegrsResBest.csv
- 3_winequality/RRegrsResBest.csv.repeatedcv.split10.pdf
- 3_winequality/RRegsResAvgs.csv
- __MACOSX/3_winequality/._RRegsResAvgs.csv
- __MACOSX/._3_winequality
- 4_automobile/
- 4_automobile/DifModels.R2.iSplits.1.pdf
- 4_automobile/DifModels.R2.iSplits.10.pdf
- 4_automobile/DifModels.R2.iSplits.2.pdf
- 4_automobile/DifModels.R2.iSplits.3.pdf
- 4_automobile/DifModels.R2.iSplits.4.pdf
- 4_automobile/DifModels.R2.iSplits.5.pdf
- 4_automobile/DifModels.R2.iSplits.6.pdf
- 4_automobile/DifModels.R2.iSplits.7.pdf
- 4_automobile/DifModels.R2.iSplits.8.pdf
- 4_automobile/DifModels.R2.iSplits.9.pdf
- 4_automobile/DifModels.RMSE.iSplits.1.pdf
- 4_automobile/DifModels.RMSE.iSplits.10.pdf
- 4_automobile/DifModels.RMSE.iSplits.2.pdf
- 4_automobile/DifModels.RMSE.iSplits.3.pdf
- 4_automobile/DifModels.RMSE.iSplits.4.pdf
- 4_automobile/DifModels.RMSE.iSplits.5.pdf
- 4_automobile/DifModels.RMSE.iSplits.6.pdf
- 4_automobile/DifModels.RMSE.iSplits.7.pdf
- 4_automobile/DifModels.RMSE.iSplits.8.pdf
- 4_automobile/DifModels.RMSE.iSplits.9.pdf
- 4_automobile/Icon
- __MACOSX/4_automobile/
- __MACOSX/4_automobile/._Icon
- 4_automobile/ModelsComp.iSplits.1.pdf
- 4_automobile/ModelsComp.iSplits.10.pdf
- 4_automobile/ModelsComp.iSplits.2.pdf
- 4_automobile/ModelsComp.iSplits.3.pdf
- 4_automobile/ModelsComp.iSplits.4.pdf
- 4_automobile/ModelsComp.iSplits.5.pdf
- 4_automobile/ModelsComp.iSplits.6.pdf
- 4_automobile/ModelsComp.iSplits.7.pdf
- 4_automobile/ModelsComp.iSplits.8.pdf
- 4_automobile/ModelsComp.iSplits.9.pdf
- 4_automobile/Parameters.csv
- 4_automobile/RRegrsResAllSplits.csv
- __MACOSX/4_automobile/._RRegrsResAllSplits.csv
- 4_automobile/RRegrsResBest.csv
- 4_automobile/RRegrsResBest.csv.repeatedcv.split10.pdf
- 4_automobile/RRegsResAvgs.csv
- __MACOSX/4_automobile/._RRegsResAvgs.csv
- __MACOSX/._4_automobile
- 5_parkinson/
- 5_parkinson/DifModels.R2.iSplits.1.pdf
- 5_parkinson/DifModels.R2.iSplits.10.pdf
- 5_parkinson/DifModels.R2.iSplits.2.pdf
- 5_parkinson/DifModels.R2.iSplits.3.pdf
- 5_parkinson/DifModels.R2.iSplits.4.pdf
- 5_parkinson/DifModels.R2.iSplits.5.pdf
- 5_parkinson/DifModels.R2.iSplits.6.pdf
- 5_parkinson/DifModels.R2.iSplits.7.pdf
- 5_parkinson/DifModels.R2.iSplits.8.pdf
- 5_parkinson/DifModels.R2.iSplits.9.pdf
- 5_parkinson/DifModels.RMSE.iSplits.1.pdf
- 5_parkinson/DifModels.RMSE.iSplits.10.pdf
- 5_parkinson/DifModels.RMSE.iSplits.2.pdf
- 5_parkinson/DifModels.RMSE.iSplits.3.pdf
- 5_parkinson/DifModels.RMSE.iSplits.4.pdf
- 5_parkinson/DifModels.RMSE.iSplits.5.pdf
- 5_parkinson/DifModels.RMSE.iSplits.6.pdf
- 5_parkinson/DifModels.RMSE.iSplits.7.pdf
- 5_parkinson/DifModels.RMSE.iSplits.8.pdf
- 5_parkinson/DifModels.RMSE.iSplits.9.pdf
- 5_parkinson/Icon
- __MACOSX/5_parkinson/
- __MACOSX/5_parkinson/._Icon
- 5_parkinson/ModelsComp.iSplits.1.pdf
- 5_parkinson/ModelsComp.iSplits.10.pdf
- 5_parkinson/ModelsComp.iSplits.2.pdf
- 5_parkinson/ModelsComp.iSplits.2_20160405T180045.100097Z.pdf
- 5_parkinson/ModelsComp.iSplits.3.pdf
- 5_parkinson/ModelsComp.iSplits.3_20160405T180043.659762Z.pdf
- 5_parkinson/ModelsComp.iSplits.4.pdf
- 5_parkinson/ModelsComp.iSplits.5.pdf
- 5_parkinson/ModelsComp.iSplits.6.pdf
- 5_parkinson/ModelsComp.iSplits.7.pdf
- 5_parkinson/ModelsComp.iSplits.8.pdf
- 5_parkinson/ModelsComp.iSplits.9.pdf
- 5_parkinson/Parameters.csv
- 5_parkinson/RRegrsResAllSplits.csv
- __MACOSX/5_parkinson/._RRegrsResAllSplits.csv
- 5_parkinson/RRegrsResBest.csv
- 5_parkinson/RRegrsResBest.csv.repeatedcv.split10.pdf
- 5_parkinson/RRegsResAvgs.csv
- __MACOSX/5_parkinson/._RRegsResAvgs.csv
- __MACOSX/._5_parkinson
- 6_UseCases/
- 6_UseCases/.DS_Store
- __MACOSX/6_UseCases/
- __MACOSX/6_UseCases/._.DS_Store
- 6_UseCases/1_ProteinCorona/
- 6_UseCases/1_ProteinCorona/DifModels.R2.iSplits.1.pdf
- 6_UseCases/1_ProteinCorona/DifModels.R2.iSplits.10.pdf
- 6_UseCases/1_ProteinCorona/DifModels.R2.iSplits.2.pdf
- 6_UseCases/1_ProteinCorona/DifModels.R2.iSplits.3.pdf
- 6_UseCases/1_ProteinCorona/DifModels.R2.iSplits.4.pdf
- 6_UseCases/1_ProteinCorona/DifModels.R2.iSplits.5.pdf
- 6_UseCases/1_ProteinCorona/DifModels.R2.iSplits.6.pdf
- 6_UseCases/1_ProteinCorona/DifModels.R2.iSplits.7.pdf
- 6_UseCases/1_ProteinCorona/DifModels.R2.iSplits.8.pdf
- 6_UseCases/1_ProteinCorona/DifModels.R2.iSplits.9.pdf
- 6_UseCases/1_ProteinCorona/DifModels.RMSE.iSplits.1.pdf
- 6_UseCases/1_ProteinCorona/DifModels.RMSE.iSplits.10.pdf
- 6_UseCases/1_ProteinCorona/DifModels.RMSE.iSplits.2.pdf
- 6_UseCases/1_ProteinCorona/DifModels.RMSE.iSplits.3.pdf
- 6_UseCases/1_ProteinCorona/DifModels.RMSE.iSplits.4.pdf
- 6_UseCases/1_ProteinCorona/DifModels.RMSE.iSplits.5.pdf
- 6_UseCases/1_ProteinCorona/DifModels.RMSE.iSplits.6.pdf
- 6_UseCases/1_ProteinCorona/DifModels.RMSE.iSplits.7.pdf
- 6_UseCases/1_ProteinCorona/DifModels.RMSE.iSplits.8.pdf
- 6_UseCases/1_ProteinCorona/DifModels.RMSE.iSplits.9.pdf
- 6_UseCases/1_ProteinCorona/ds.No0Var.csv
- 6_UseCases/1_ProteinCorona/ds.pcorona.csv
- 6_UseCases/1_ProteinCorona/ds.scaled.csv
- 6_UseCases/1_ProteinCorona/ds.scaled.NoCorrs.csv
- 6_UseCases/1_ProteinCorona/ds.scaled.NoCorrs.csv.corrMAT.csv
- 6_UseCases/1_ProteinCorona/ds.scaled.NoCorrs.csv.corrs.png
- 6_UseCases/1_ProteinCorona/ds.Test.split 1 .csv
- 6_UseCases/1_ProteinCorona/ds.Test.split 10 .csv
- 6_UseCases/1_ProteinCorona/ds.Test.split 2 .csv
- 6_UseCases/1_ProteinCorona/ds.Test.split 3 .csv
- 6_UseCases/1_ProteinCorona/ds.Test.split 4 .csv
- 6_UseCases/1_ProteinCorona/ds.Test.split 5 .csv
- 6_UseCases/1_ProteinCorona/ds.Test.split 6 .csv
- 6_UseCases/1_ProteinCorona/ds.Test.split 7 .csv
- 6_UseCases/1_ProteinCorona/ds.Test.split 8 .csv
- 6_UseCases/1_ProteinCorona/ds.Test.split 9 .csv
- 6_UseCases/1_ProteinCorona/ds.Train.split 1 .csv
- 6_UseCases/1_ProteinCorona/ds.Train.split 10 .csv
- 6_UseCases/1_ProteinCorona/ds.Train.split 2 .csv
- 6_UseCases/1_ProteinCorona/ds.Train.split 3 .csv
- 6_UseCases/1_ProteinCorona/ds.Train.split 4 .csv
- 6_UseCases/1_ProteinCorona/ds.Train.split 5 .csv
- 6_UseCases/1_ProteinCorona/ds.Train.split 6 .csv
- 6_UseCases/1_ProteinCorona/ds.Train.split 7 .csv
- 6_UseCases/1_ProteinCorona/ds.Train.split 8 .csv
- 6_UseCases/1_ProteinCorona/ds.Train.split 9 .csv
- 6_UseCases/1_ProteinCorona/ENET.details.csv
- 6_UseCases/1_ProteinCorona/ENET.details.csv.repeatedcv.split1.pdf
- 6_UseCases/1_ProteinCorona/ENET.details.csv.repeatedcv.split10.pdf
- 6_UseCases/1_ProteinCorona/ENET.details.csv.repeatedcv.split2.pdf
- 6_UseCases/1_ProteinCorona/ENET.details.csv.repeatedcv.split3.pdf
- 6_UseCases/1_ProteinCorona/ENET.details.csv.repeatedcv.split4.pdf
- 6_UseCases/1_ProteinCorona/ENET.details.csv.repeatedcv.split5.pdf
- 6_UseCases/1_ProteinCorona/ENET.details.csv.repeatedcv.split6.pdf
- 6_UseCases/1_ProteinCorona/ENET.details.csv.repeatedcv.split7.pdf
- 6_UseCases/1_ProteinCorona/ENET.details.csv.repeatedcv.split8.pdf
- 6_UseCases/1_ProteinCorona/ENET.details.csv.repeatedcv.split9.pdf
- 6_UseCases/1_ProteinCorona/GLM.details.csv
- 6_UseCases/1_ProteinCorona/GLM.details.csv.repeatedcv.split1.pdf
- 6_UseCases/1_ProteinCorona/GLM.details.csv.repeatedcv.split10.pdf
- 6_UseCases/1_ProteinCorona/GLM.details.csv.repeatedcv.split2.pdf
- 6_UseCases/1_ProteinCorona/GLM.details.csv.repeatedcv.split3.pdf
- 6_UseCases/1_ProteinCorona/GLM.details.csv.repeatedcv.split4.pdf
- 6_UseCases/1_ProteinCorona/GLM.details.csv.repeatedcv.split5.pdf
- 6_UseCases/1_ProteinCorona/GLM.details.csv.repeatedcv.split6.pdf
- 6_UseCases/1_ProteinCorona/GLM.details.csv.repeatedcv.split7.pdf
- 6_UseCases/1_ProteinCorona/GLM.details.csv.repeatedcv.split8.pdf
[truncated: 360 more entries]
