# Supplementary material for: A methodology for the design of experiments in computational intelligence with multiple regression models
Source: PeerJ. 2016 Dec 1;4:e2721. doi: 10.7717/peerj.2721 (PMC5136129; doi:10.7717/peerj.2721)
Supplement: Data S1 — Datailed results from UC Irvine Machine Learning Repository (Housing, Machine CPU, Wine Quality, Automobile and Parkinson) and the 3 Use Cases (Protein Corona, Gajewicz Metal Oxides and Aquatic Toxicity) [file peerj-04-2721-s001.zip › 0_datasets/ds.automobile.csv]

price	symboling	wheelBase	length	width	height	curbWeight	engineSize	bore	stroke	compressionRatio	horsepower	peakRpm	cityMpg	highwayMpg
6488	1	95.7	158.7	63.6	54.5	2015	92	3.05	3.03	9	62	4800	31	38
17669	2	98.4	176.2	65.6	53	2975	146	3.62	3.5	9.3	116	4800	24	30
6669	2	93.7	157.3	64.4	50.8	2004	92	2.97	3.23	9.4	68	5500	31	38
13950	2	99.8	176.6	66.2	54.3	2337	109	3.19	3.4	10	102	5500	24	30
6785	0	94.3	170.7	61.8	53.5	2337	111	3.31	3.23	8.5	78	4800	24	29
7775	0	97.2	172	65.4	52.5	2190	108	3.62	2.64	9.5	82	4400	28	33
17075	0	114.2	198.9	68.4	58.7	3485	152	3.7	3.52	21	95	4150	25	25
40960	0	120.9	208.1	71.7	56.7	3900	308	3.8	3.35	8	184	4500	14	16
18150	3	99.1	186.6	66.5	56.1	2808	121	3.54	3.07	9	160	5500	19	26
31600	-1	115.6	202.6	71.7	56.3	3770	183	3.58	3.64	21.5	123	4350	22	25
12940	-2	104.3	188.8	67.2	56.2	2912	141	3.78	3.15	9.5	114	5400	23	28
7898	0	95.7	166.3	64.4	53	2275	110	3.27	3.35	22.5	56	4500	34	36
6849	1	94.5	165.3	63.8	54.5	1938	97	3.15	3.29	9.4	69	5200	31	37
7395	1	93.1	166.8	64.2	54.1	1950	91	3.08	3.15	9	68	5000	31	38
32528	3	89.5	168.9	65	51.6	2756	194	3.74	2.9	9.5	207	5900	17	25
16500	3	88.6	168.8	64.1	48.8	2548	130	3.47	2.68	9	111	5000	21	27
7198	0	95.7	166.3	64.4	52.8	2109	98	3.19	3.03	9	70	4800	30	37
15250	2	99.8	177.3	66.3	53.1	2507	136	3.19	3.4	8.5	110	5500	19	25
9988	-1	102.4	175.6	66.5	53.9	2414	122	3.31	3.54	8.7	92	4200	27	32
12945	0	96.5	175.4	65.2	54.1	2465	110	3.15	3.58	9	101	5800	24	28
32250	0	113	199.6	69.6	52.8	4066	258	3.63	4.17	8.1	176	4750	15	19
11900	0	107.9	186.7	68.4	56.7	3020	120	3.46	3.19	8.4	97	5000	19	24
6529	1	93.7	150	64	52.6	1940	92	2.91	3.41	9.2	76	6000	30	34
10198	0	97	173.5	65.4	53	2455	108	3.62	2.64	9	94	5200	25	31
6918	0	95.7	169.7	63.6	59.1	2280	92	3.05	3.03	9	62	4800	31	37
18920	1	105.8	192.7	71.4	55.7	2954	136	3.19	3.4	8.5	110	5500	19	25
7609	1	93.7	167.3	63.8	50.8	2191	98	2.97	3.23	9.4	68	5500	31	38
8189	1	96.3	172.4	65.4	51.6	2405	122	3.35	3.46	8.5	88	5000	25	32
8921	-1	103.3	174.6	64.6	59.8	2535	122	3.34	3.46	8.5	88	5000	24	30
7299	1	94.5	165.3	63.8	54.5	1951	97	3.15	3.29	9.4	69	5200	31	37
6692	1	93.7	157.3	63.8	50.6	1989	90	2.97	3.23	9.4	68	5500	31	38
6695	1	93.1	166.8	64.2	54.1	1945	91	3.03	3.15	9	68	5000	31	38
9233	0	97	172	65.4	54.3	2385	108	3.62	2.64	9	82	4800	24	25
16503	1	102.7	178.4	68	54.8	2910	140	3.78	3.12	8	175	5000	19	24
8358	0	95.7	166.3	64.4	52.8	2122	98	3.19	3.03	9	70	4800	28	34
12440	0	114.2	198.9	68.4	58.7	3230	120	3.46	3.19	8.4	97	5000	19	24
35056	3	96.6	180.3	70.5	50.8	3685	234	3.46	3.1	8.3	155	4750	16	18
16695	0	114.2	198.9	68.4	56.7	3285	120	3.46	2.19	8.4	95	5000	19	24
7957	1	93.7	157.3	63.8	50.8	2128	98	3.03	3.39	7.6	102	5500	24	30
15580	0	107.9	186.7	68.4	56.7	3075	120	3.46	2.19	8.4	95	5000	19	24
9279	1	96.3	172.4	65.4	51.6	2403	110	3.17	3.46	7.5	116	5500	23	30
34184	-1	115.6	202.6	71.7	56.5	3740	234	3.46	3.1	8.3	155	4750	16	18
7995	2	97.3	171.7	65.5	55.7	2264	97	3.01	3.4	23	52	4800	37	46
6338	1	95.7	158.7	63.6	54.5	2040	92	3.05	3.03	9	62	4800	31	38
10245	0	98.8	177.8	66.5	55.5	2410	122	3.39	3.39	8.6	84	4800	26	32
30760	0	103.5	189	66.9	55.7	3230	209	3.62	3.39	8	182	5400	16	22
12964	3	95.9	173.2	66.3	50.2	2811	156	3.6	3.9	7	145	5000	19	24
21485	-1	109.1	188.8	68.9	55.5	3012	173	3.58	2.87	8.8	134	5500	18	23
11245	0	98.8	177.8	66.5	55.5	2425	122	3.39	3.39	8.6	84	4800	26	32
9639	2	98.4	176.2	65.6	52	2536	146	3.62	3.5	9.3	116	4800	24	30
14869	3	95.9	173.2	66.3	50.2	2921	156	3.59	3.86	7	145	5000	19	24
6649	1	94.5	165.3	63.8	54.5	1918	97	3.15	3.29	9.4	69	5200	31	37
6855	2	86.6	144.6	63.9	50.8	1819	92	2.91	3.41	9.2	76	6000	31	38
23875	1	105.8	192.7	71.4	55.9	3086	131	3.13	3.4	8.3	140	5500	17	20
7126	0	97.2	172	65.4	52.5	2145	108	3.62	2.64	9.5	82	4800	32	37
11549	2	98.4	176.2	65.6	52	2714	146	3.62	3.5	9.3	116	4800	24	30
11199	2	98.4	176.2	65.6	52	2679	146	3.62	3.5	9.3	116	4800	24	30
24565	1	103.5	189	66.9	55.7	3055	164	3.31	3.19	9	121	4250	20	25
16430	2	101.2	176.8	64.8	54.3	2395	108	3.5	2.8	8.8	101	5800	23	29
8495	2	97.3	171.7	65.5	55.7	2275	109	3.19	3.4	9	85	5250	27	34
8495	0	98.8	177.8	66.5	55.5	2410	122	3.39	3.39	8.6	84	4800	26	32
8845	1	98.8	177.8	66.5	53.7	2385	122	3.39	3.39	8.6	84	4800	26	32
22625	-1	109.1	188.8	68.9	55.5	3062	141	3.78	3.15	9.5	114	5400	19	25
36880	0	110	197	70.9	56.3	3505	209	3.62	3.39	8	182	5400	15	20
6938	0	95.7	166.3	64.4	53	2081	98	3.19	3.03	9	70	4800	30	37
10295	0	96.5	175.4	62.5	54.1	2372	110	3.15	3.58	9	86	5800	27	33
19699	3	91.3	170.7	67.9	49.7	3139	181	3.43	3.27	7.8	200	5200	17	23
21105	0	101.2	176.8	64.8	54.3	2765	164	3.31	3.19	9	121	4250	21	28
6189	2	93.7	157.3	64.4	50.8	1944	92	2.97	3.23	9.4	68	5500	31	38
7609	1	93.7	157.3	63.8	50.6	1989	90	2.97	3.23	9.4	68	5500	31	38
14399	0	100.4	184.6	66.5	56.1	3296	181	3.43	3.27	9	152	5200	17	22
15690	-1	104.5	187.8	66.5	54.1	3131	171	3.27	3.35	9.2	156	5200	20	24
7898	0	95.7	169.7	63.6	59.1	2290	92	3.05	3.03	9	62	4800	27	32
28176	0	106.7	187.5	70.3	54.9	3495	183	3.58	3.64	21.5	123	4350	22	25
10795	0	98.8	177.8	66.5	55.5	2443	122	3.39	3.39	22.7	64	4650	36	42
41315	0	103.5	193.8	67.9	53.7	3380	209	3.62	3.39	8	182	5400	16	22
12170	2	99.1	186.6	66.5	56.1	2695	121	3.54	3.07	9.3	110	5250	21	28
28248	-1	110	190.9	70.3	58.7	3750	183	3.58	3.64	21.5	123	4350	22	25
7295	0	96.5	157.1	63.9	58.3	2024	92	2.92	3.41	9.2	76	6000	30	34
7689	1	93	157.3	63.8	50.8	2145	98	3.03	3.39	7.6	102	5500	24	30
6692	1	93.7	167.3	63.8	50.8	1989	90	2.97	3.23	9.4	68	5500	31	38
7799	1	94.5	165.6	63.8	53.3	2028	97	3.15	3.29	9.4	69	5200	31	37
8249	2	95.1	162.4	63.8	53.3	2008	97	3.15	3.29	9.4	69	5200	31	37
5348	1	95.7	158.7	63.6	54.5	1985	92	3.05	3.03	9	62	4800	35	39
18950	-1	104.3	188.8	67.2	57.5	3157	130	3.62	3.15	7.5	162	5100	17	22
7975	2	97.3	171.7	65.5	55.7	2209	109	3.19	3.4	9	85	5250	27	34
7999	1	94.5	170.2	63.8	53.5	2037	97	3.15	3.29	9.4	69	5200	31	37
17450	2	99.4	176.6	66.4	54.3	2824	136	3.19	3.4	8	115	5500	18	22
18280	0	104.9	175	66.1	54.4	2670	140	3.76	3.16	8	120	5000	19	27
5572	1	93.7	157.3	63.8	50.8	1876	90	2.97	3.23	9.41	68	5500	37	41
12290	0	100.4	183.1	66.9	55.1	2563	109	3.19	3.4	9	88	5500	25	31
11248	-1	102.4	175.6	66.5	53.9	2458	122	3.31	3.54	8.7	92	4200	27	32
7738	0	95.7	166.3	64.4	53	2094	98	3.19	3.03	9	70	4800	38	47
11595	3	94.5	159.3	64.2	55.6	2254	109	3.19	3.4	8.5	90	5500	24	29
9258	0	95.7	166.3	64.4	52.8	2140	98	3.19	3.03	9	70	4800	28	34
8013	0	96.9	173.6	65.4	54.9	2420	108	3.62	2.64	9	82	4800	23	29
6295	1	94.5	155.9	63.6	52	1874	90	3.03	3.11	9.6	70	5400	38	43
9279	-1	96.3	172.4	65.4	51.6	2403	110	3.17	3.46	7.5	116	5500	23	30
15750	-1	104.5	187.8	66.5	54.1	3151	161	3.27	3.35	9.2	156	5200	19	24
10595	1	98.8	177.8	66.5	53.7	2385	122	3.39	3.39	8.6	84	4800	26	32
5118	2	93.7	156.9	63.4	53.7	2050	97	3.62	2.36	9	69	4900	31	36
7295	0	96.5	163.4	64	54.5	2010	92	2.91	3.41	9.2	76	6000	30	34
18420	-2	104.3	188.8	67.2	56.2	3045	130	3.62	3.15	7.5	162	5100	17	22
16845	-1	109.1	188.8	68.9	55.5	2952	141	3.78	3.15	9.5	114	5400	23	28
9960	0	97.2	172	65.4	52.5	2340	108	3.62	2.64	9	94	5200	26	32
25552	-1	110	190.9	70.3	56.5	3515	183	3.58	3.64	21.5	123	4350	22	25
6795	1	93.1	159.1	64.2	54.1	1905	91	3.03	3.15	9	68	5000	31	38
19045	-1	109.1	188.8	68.8	55.5	3049	141	3.78	3.15	8.7	160	5300	19	25
8845	0	96.5	175.4	65.2	54.1	2304	110	3.15	3.58	9	86	5800	27	33
16630	0	107.9	186.7	68.4	56.7	3075	120	3.46	3.19	8.4	97	5000	19	24
13499	0	100.4	184.6	66.5	55.1	3060	181	3.43	3.27	9	152	5200	19	25
13415	-1	104.3	188.8	67.2	57.5	3034	141	3.78	3.15	9.5	114	5400	23	28
5499	1	94.5	165.3	63.8	54.5	1889	97	3.15	3.29	9.4	69	5200	31	37
7129	1	93.7	150	64	52.6	1956	92	2.91	3.41	9.2	76	6000	30	34
7957	1	93.7	157.3	63.8	50.8	2128	98	3.03	3.39	7.6	102	5500	24	30
8778	0	95.7	169.7	63.6	59.1	3110	92	3.05	3.03	9	62	4800	27	32
8238	1	94.5	168.7	64	52.6	2204	98	3.19	3.03	9	70	4800	29	34
15510	2	99.1	186.6	66.5	56.1	2758	121	3.54	3.07	9.3	110	5250	21	28
7499	1	94.5	165.3	63.8	54.5	1971	97	3.15	3.29	9.4	69	5200	31	37
20970	0	101.2	176.8	64.8	54.3	2710	164	3.31	3.19	9	121	4250	21	28
5151	2	88.4	141.1	60.3	53.2	1488	61	2.91	3.03	9.5	48	5100	47	53
6989	1	96.3	172.4	65.4	51.6	2365	122	3.35	3.46	8.5	88	5000	25	32
10698	-1	102.4	175.6	66.5	54.9	2480	110	3.27	3.35	22.5	73	4500	30	33
6575	0	94.5	158.8	63.6	52	1909	90	3.03	3.11	9.6	70	5400	38	43
6479	2	86.6	144.6	63.9	50.8	1713	92	2.91	3.41	9.6	58	4800	49	54
7895	0	96.5	167.5	65.2	53.3	2236	110	3.15	3.58	9	86	5800	27	33
5399	1	93.7	150	64	52.6	1837	79	2.91	3.07	10.1	60	5500	38	42
14489	3	95.9	173.2	66.3	50.2	2926	156	3.59	3.86	7	145	5000	19	24
15040	3	99.1	186.6	66.5	56.1	2707	121	2.54	2.07	9.3	110	5250	21	28
22470	-1	109.1	188.8	68.9	55.5	3217	145	3.01	3.4	23	106	4800	26	27
9980	3	94.5	165.7	64	51.4	2221	109	3.19	3.4	8.5	90	5500	24	29
8449	2	98.4	176.2	65.6	52	2540	146	3.62	3.5	9.3	116	4800	24	30
9095	0	96.5	167.5	65.2	53.3	2289	110	3.15	3.58	9	86	5800	27	33
15998	3	102.9	183.5	67.7	52	3016	171	3.27	3.35	9.3	161	5200	19	24
8499	3	96.3	173	65.4	49.4	2328	122	3.35	3.46	8.5	88	5000	25	32
16500	1	94.5	171.2	65.5	52.4	2823	152	2.68	3.47	9	154	5000	19	26
18150	0	108	186.7	68.3	56	3130	134	3.61	3.21	7	142	5600	18	24
9989	2	98.4	176.2	65.6	52	2551	146	3.62	3.5	9.3	116	4800	24	30
11850	3	99.1	186.6	66.5	56.1	2658	121	3.54	3.07	9.31	110	5250	21	28
8058	1	94.5	168.7	64	52.6	2169	98	3.19	3.03	9	70	4800	29	34
18620	2	99.1	186.6	66.5	56.1	2847	121	3.54	3.07	9	160	5500	19	26
13860	0	114.2	198.9	68.4	58.7	3430	152	3.7	3.52	21	95	4150	25	25
11694	0	96.9	173.6	65.4	54.9	2650	108	3.62	2.64	7.7	111	4800	23	23
8921	-1	103.3	174.6	64.6	59.8	2535	122	3.35	3.46	8.5	88	5000	24	30
9538	1	94.5	168.7	64	52.6	2300	98	3.24	3.08	9.4	112	6600	26	29
35550	0	113	199.6	69.6	52.8	4066	258	3.63	4.17	8.1	176	4750	15	19
13200	0	107.9	186.7	68.4	56.7	3197	152	3.7	3.52	21	95	4150	28	33
11259	0	97	172	65.4	54.3	2510	108	3.62	2.64	7.7	111	4800	24	29
16900	0	107.9	186.7	68.4	56.7	3252	152	3.7	3.52	21	95	4150	28	33
7788	0	95.7	166.3	64.4	52.8	2275	110	3.27	3.35	22.5	56	4500	38	47
36000	0	102	191.7	70.6	47.8	3950	326	3.54	2.76	11.5	262	5000	13	17
17199	3	91.3	170.7	67.9	49.7	3071	181	3.43	3.27	9	160	5200	19	25
17950	0	107.9	186.7	68.4	56.7	3252	152	3.7	3.52	21	95	4150	28	33
7053	2	93.7	157.9	63.6	53.7	2120	108	3.62	2.64	8.7	73	4400	26	31
9959	3	96.3	173	65.4	49.4	2370	110	3.17	3.46	7.5	116	5500	23	30
18344	0	104.9	175	66.1	54.4	2700	134	3.43	3.64	22	72	4200	31	39
5389	2	93.7	157.3	64.4	50.8	1918	92	2.97	3.23	9.4	68	5500	37	41
34028	3	89.5	168.9	65	51.6	2756	194	3.74	2.9	9.5	207	5900	17	25
6229	1	93.7	157.3	63.8	50.6	1967	90	2.97	3.23	9.4	68	5500	31	38
7099	1	94.5	165.3	63.8	54.5	2017	103	2.99	3.47	21.9	55	4800	45	50
6095	1	93.1	159.1	64.2	54.1	1900	91	3.03	3.15	9	68	5000	31	38
7603	2	93.3	157.3	63.8	55.7	2240	108	3.62	2.64	8.7	73	4400	26	31
6229	1	93.7	157.3	63.8	50.6	1967	90	2.97	3.23	9.4	68	5500	31	38
15985	-2	104.3	188.8	67.2	56.2	2935	141	3.78	3.15	9.5	114	5400	24	28
17710	1	105.8	192.7	71.4	55.7	2844	136	3.19	3.4	8.5	110	5500	19	25
7775	2	97.3	171.7	65.5	55.7	2261	97	3.01	3.4	23	52	4800	37	46
8949	0	97.2	173.4	65.2	54.7	2324	120	3.33	3.47	8.5	97	5200	27	34
5572	1	93.7	157.3	63.8	50.8	1918	90	2.97	3.23	9.4	68	5500	37	41
8558	1	93.7	157.3	63.8	50.6	2191	98	3.03	3.39	7.6	102	5500	24	30
13295	0	100.4	180.2	66.9	55.1	2661	136	3.19	3.4	8.5	110	5500	19	24
12629	3	95.9	173.2	66.3	50.2	2833	156	3.58	3.86	7	145	5000	19	24
16558	3	102.9	183.5	67.7	52	2976	171	3.27	3.35	9.3	161	5200	20	24
13845	0	100.4	180.2	66.9	55.1	2579	97	3.01	3.4	23	68	4500	33	38
45400	1	112	199.2	72	55.4	3715	304	3.8	3.35	8	184	4500	14	16
5195	1	93.1	159.1	64.2	54.1	1890	91	3.03	3.15	9	68	5000	30	31
11048	2	96	172.6	65.2	51.4	2734	119	3.43	3.23	9.2	90	5000	24	29
8948	-1	102.4	175.6	66.5	54.9	2326	122	3.31	3.54	8.7	92	4200	29	34
16515	-1	104.3	188.8	67.2	57.5	3042	141	3.78	3.15	9.5	114	5400	24	28
13495	3	88.6	168.8	64.1	48.8	2548	130	3.47	2.68	9	111	5000	21	27
13499	0	100.4	181.7	66.5	55.1	3095	181	3.43	3.27	9	152	5200	17	22
8195	2	97.3	171.7	65.5	55.7	2212	109	3.19	3.4	9	85	5250	27	34
22018	3	94.5	168.9	68.3	50.2	2778	151	3.94	3.11	9.5	143	5500	19	27
7463	0	97	173.5	65.4	53	2290	108	3.62	2.64	9	82	4800	28	32
16925	0	101.2	176.8	64.8	54.3	2395	108	3.5	2.8	8.8	101	5800	23	29
9549	0	97.2	173.4	65.2	54.7	2302	120	3.33	3.47	8.5	97	5200	27	34
9995	2	97.3	171.7	65.5	55.7	2300	109	3.19	3.4	10	100	5500	26	32
10898	-1	102.4	175.6	66.5	54.9	2414	122	3.31	3.54	8.7	92	4200	27	32
37028	3	89.5	168.9	65	51.6	2800	194	3.74	2.9	9.5	207	5900	17	25
7349	1	94.5	170.2	63.8	53.5	2024	97	3.15	3.29	9.4	69	5200	31	37
9495	2	97.3	171.7	65.5	55.7	2319	97	3.01	3.4	23	68	4500	37	42
6377	1	93.7	157.3	63.8	50.8	1876	90	2.97	3.23	9.4	68	5500	31	38
9298	1	94.5	168.7	64	52.6	2265	98	3.24	3.08	9.4	112	6600	26	29
10345	1	96.5	169.1	66	51	2293	110	3.15	3.58	9.1	100	5500	25	31
18399	1	99.2	178.5	67.9	49.7	3139	181	3.43	3.27	9	160	5200	19	25
12764	3	95.9	173.2	66.3	50.2	2818	156	3.59	3.86	7	145	5000	19	24
