# Supplementary material for: A methodology for the design of experiments in computational intelligence with multiple regression models
Source: PeerJ. 2016 Dec 1;4:e2721. doi: 10.7717/peerj.2721 (PMC5136129; doi:10.7717/peerj.2721)
Supplement: Data S1 — Datailed results from UC Irvine Machine Learning Repository (Housing, Machine CPU, Wine Quality, Automobile and Parkinson) and the 3 Use Cases (Protein Corona, Gajewicz Metal Oxides and Aquatic Toxicity) [file peerj-04-2721-s001.zip › 0_datasets/ds.gajewicz.csv]

net.c	DHcf	TotalEnergy	ElectronicEnergy	CoreCoreRepulsionEnergyCore	SolventAccessibleSurface	HOMO.HOMO	LUMO.LUMO	ChemicalHardness	TotalSoftness	HOMO.LUMO.EnergyGap	ElectronicChemicalPotential	ValanceBand	ConductionBand	MullikensElectronegativity	ParrPopleAbsoluteHardness	SchuurmannMO.shift.alpha	PolarizabilityAhof	Polarizability derived from the dipole moment Ad	Area	Volume	SurfaceDiameter	Volume.MassDiameter	Volume.SurfaceDiameter	AspectRatioX	AspectRatioY	PorosityX	PorosityY	Sphericity	Circularity	Size	ParticleSizeMedia	ZETA.POTENTIAL
1.85	-600	-2755.8	-11997.7	9242	307.16	-8.53	1.66	-5.09	-0.1	-10.18	-3.44	1.66	-8.53	3.44	5.09	-3.44	17.83	17.79	1.11E+09	1.86E+06	1.88E+04	153	1.01E-02	0.568	0.072	5.15E+04	-3.16E+05	6.62E-05	4.00E-03	44	372.3	-20.2
2.5	-148.5	-2864.3	-11242.7	8378.4	251.06	-9.43	-1.25	-4.09	-0.12	-8.18	-5.34	-1.25	-9.43	5.34	4.09	-5.34	19.92	19.84	9.80E+08	2.05E+06	1.77E+04	158	1.25E-02	0.402	0.055	-2.86E+05	-1.80E+05	7.94E-05	2.90E-03	90	2029	-2.3
2.83	-786.8	-5378.2	-45466.7	40088.5	347.56	-9.21	-5.67	-1.77	-0.28	-3.55	-7.44	-5.67	-9.21	7.44	1.5	-8.25	45.5	45.5	1.14E+09	2.14E+06	1.90E+04	160	1.13E-02	0.429	0.061	2.11E+04	-2.42E+05	7.07E-05	3.10E-03		257	-3.4
2.3	-235.3	-2507.8	-10028.3	7520.4	167.3	-8.25	-0.46	-3.89	-0.13	-7.79	-4.36	-0.46	-8.25	4.36	3.89	-4.36	16.35	16.02	8.70E+08	1.52E+06	1.67E+04	143	1.05E-02	0.263	0.06	-3.42E+05	-5.51E+05	7.34E-05	4.70E-03	60	616.8	5.7
2.05	-378.5	-3480.9	-13651.6	10170.7	172.57	-8.33	-0.09	-4.12	-0.12	-8.24	-4.21	-0.09	-8.33	4.21	4.44	-4.57	12.33	12.32	1.09E+09	1.78E+06	1.86E+04	150	9.80E-03	0.446	0.066	-1.18E+05	-3.18E+05	6.52E-05	4.30E-03	32	297.6	-18.1
2.92	-52.1	-1961	-6085.1	4124.1	191.2	-10.62	-2.95	-3.84	-0.13	-7.68	-6.78	-2.95	-10.62	6.78	3.84	-6.78	12.44	12.43	1.07E+09	2.04E+06	1.85E+04	157	1.14E-02	0.499	0.065	-1.68E+04	-2.81E+05	7.24E-05	3.20E-03	29.8	224.3	-9.6
2.87	-157.7	-2486.1	-8602.4	6116.2	232.92	-10.91	-2	-4.45	-0.11	-8.9	-6.45	-2	-10.91	6.45	4.45	-6.45	4.95	4.95	1.10E+09	1.91E+06	1.87E+04	154	1.05E-02	0.524	0.072	1.33E+04	-2.87E+05	6.79E-05	3.80E-03	45.6	672.9	-12.8
2.64	-96.3	-5269.3	-34774.7	29505.4	321.38	-5.02	-4.98	-0.02	-27.78	-0.04	-5	-4.98	-5.02	5	0.02	-5	734.03	40.97	1.09E+09	2.04E+06	1.86E+04	157	1.12E-02	0.479	0.064	7.57E+04	-2.46E+05	7.12E-05	3.30E-03	29.8	291.1	-3
2.49	68	-4671	-22764.2	18093.2	179.35	-7.78	-1.16	-3.31	-0.15	-6.62	-4.47	-1.16	-7.78	4.47	3.04	-4.37	21.35	21.23	1.19E+09	1.96E+06	1.95E+04	155	9.90E-03	0.596	0.068	6.55E+03	-3.11E+05	6.36E-05	3.90E-03	20	223.5	-12.1
2.31	-206.7	-2504.8	-10756.3	8251.5	255.24	-7.96	-0.96	-3.5	-0.14	-7	-4.46	-0.96	-7.96	4.46	3.5	-4.46	23.21	23.12	9.60E+08	1.80E+06	1.74E+04	151	1.13E-02	0.241	0.055	3.49E+05	-3.72E+05	7.48E-05	3.70E-03		640.3	-13.3
2.12	-618.3	-2764.2	-10201.7	7437.6	262.92	-7.9	0.28	-4.09	-0.12	-8.18	-3.81	0.28	-7.9	3.81	4.09	-3.81	31.58	31.54	9.70E+08	1.81E+06	1.76E+04	15	1.12E-02	0.421	0.065	1.25E+05	-4.13E+05	7.39E-05	3.70E-03	15	809.7	-8.1
2.67	-266.6	-3511	-17713	14202	359.32	-6.97	-2.18	-2.4	-0.21	-4.79	-4.57	-2.18	-6.97	4.57	2.4	-4.57	34.22	34.14	9.30E+08	1.68E+06	1.72E+04	148	1.09E-02	0.408	0.078	-6.23E+04	-4.28E+05	7.37E-05	4.10E-03	46.1	264.9	-10.5
1.76	-1492	-2782.9	-12685.1	9902.2	271.58	-7.08	-2.73	-2.18	-0.23	-4.36	-4.91	-2.73	-7.08	4.91	2.14	-4.33	49.54	24.94	9.20E+08	1.77E+06	1.71E+04	150	1.16E-02	0.408	0.078	9.79E+03	-3.98E+05	7.70E-05	3.70E-03	42.3	1307	-9.6
2.24	-139.5	-2168.1	-7623.9	5455.8	206.12	-5.81	-0.66	-2.58	-0.19	-5.15	-3.24	-0.66	-5.81	3.24	2.58	-3.24	26.36	26.22	1.30E+09	2.20E+06	2.03E+04	161	1.02E-02	0.569	0.059	-5.81E+03	-2.20E+05	6.29E-05	3.40E-03		433.9	-22.8
2.56	-715.4	-4310.9	-21750.8	17439.9	302.37	-6.84	-6.61	-0.11	-4.41	-0.23	-6.73	-6.61	-6.84	6.73	0.11	-6.73	40.16	39.79	9.80E+08	1.72E+06	1.76E+04	149	1.06E-02	0.409	0.067	-1.67E+05	-4.30E+05	7.11E-05	4.10E-03		179.6	-9.1
2.21	-135.3	-2179.8	-9171.1	6991.3	636.97	-5.19	-1.51	-1.84	-0.27	-3.68	-3.35	-1.51	-5.19	3.35	1.84	-3.35	107	106.98	1.28E+09	2.26E+06	2.02E+04	163	1.06E-02	0.633	0.058	1.02E+04	-1.89E+05	6.51E-05	3.10E-03	38	1222.9	-10.7
3.32	-449.4	-1320.2	-3221.7	1901.5	153.42	-11.36	-5.3	-3.03	-0.16	-6.07	-8.33	-5.3	-11.36	8.33	3.03	-8.33	9.09	9.07	1.11E+09	1.95E+06	1.88E+04	155	1.05E-02	0.535	0.071	1.83E+03	-3.04E+05	6.80E-05	3.70E-03	71	188.9	-10.8
2.02	-638.1	-1331.3	-3510.7	2179.4	178.99	-10.92	1.03	-5.97	-0.08	-11.95	-4.95	1.03	-10.92	4.95	5.97	-4.95	10.74	10.71	1.20E+09	2.22E+06	1.95E+04	162	1.11E-02	0.508	0.059	9.68E+03	-2.19E+05	6.86E-05	3.10E-03	46.7	661.4	-8.5
