# Supplementary material for: A methodology for the design of experiments in computational intelligence with multiple regression models
Source: PeerJ. 2016 Dec 1;4:e2721. doi: 10.7717/peerj.2721 (PMC5136129; doi:10.7717/peerj.2721)
Supplement: Data S1 — Datailed results from UC Irvine Machine Learning Repository (Housing, Machine CPU, Wine Quality, Automobile and Parkinson) and the 3 Use Cases (Protein Corona, Gajewicz Metal Oxides and Aquatic Toxicity) [file peerj-04-2721-s001.zip › 0_datasets/ds.Housing.csv]

MEDV	CRIM	ZN	INDUS	CHAS	NOX	RM	AGE	DIS	RAD	TAX	PTRATIO	B	LSTAT
24	0.00632	18	2.31	0	0.538	6.575	65.2	4.09	1	296	15.3	396.9	4.98
21.6	0.02731	0	7.07	0	0.469	6.421	78.9	4.9671	2	242	17.8	396.9	9.14
34.7	0.02729	0	7.07	0	0.469	7.185	61.1	4.9671	2	242	17.8	392.83	4.03
33.4	0.03237	0	2.18	0	0.458	6.998	45.8	6.0622	3	222	18.7	394.63	2.94
36.2	0.06905	0	2.18	0	0.458	7.147	54.2	6.0622	3	222	18.7	396.9	5.33
28.7	0.02985	0	2.18	0	0.458	6.43	58.7	6.0622	3	222	18.7	394.12	5.21
22.9	0.08829	12.5	7.87	0	0.524	6.012	66.6	5.5605	5	311	15.2	395.6	12.43
27.1	0.14455	12.5	7.87	0	0.524	6.172	96.1	5.9505	5	311	15.2	396.9	19.15
16.5	0.21124	12.5	7.87	0	0.524	5.631	100	6.0821	5	311	15.2	386.63	29.93
18.9	0.17004	12.5	7.87	0	0.524	6.004	85.9	6.5921	5	311	15.2	386.71	17.1
15	0.22489	12.5	7.87	0	0.524	6.377	94.3	6.3467	5	311	15.2	392.52	20.45
18.9	0.11747	12.5	7.87	0	0.524	6.009	82.9	6.2267	5	311	15.2	396.9	13.27
21.7	0.09378	12.5	7.87	0	0.524	5.889	39	5.4509	5	311	15.2	390.5	15.71
20.4	0.62976	0	8.14	0	0.538	5.949	61.8	4.7075	4	307	21	396.9	8.26
18.2	0.63796	0	8.14	0	0.538	6.096	84.5	4.4619	4	307	21	380.02	10.26
19.9	0.62739	0	8.14	0	0.538	5.834	56.5	4.4986	4	307	21	395.62	8.47
23.1	1.05393	0	8.14	0	0.538	5.935	29.3	4.4986	4	307	21	386.85	6.58
17.5	0.7842	0	8.14	0	0.538	5.99	81.7	4.2579	4	307	21	386.75	14.67
20.2	0.80271	0	8.14	0	0.538	5.456	36.6	3.7965	4	307	21	288.99	11.69
18.2	0.7258	0	8.14	0	0.538	5.727	69.5	3.7965	4	307	21	390.95	11.28
13.6	1.25179	0	8.14	0	0.538	5.57	98.1	3.7979	4	307	21	376.57	21.02
19.6	0.85204	0	8.14	0	0.538	5.965	89.2	4.0123	4	307	21	392.53	13.83
15.2	1.23247	0	8.14	0	0.538	6.142	91.7	3.9769	4	307	21	396.9	18.72
14.5	0.98843	0	8.14	0	0.538	5.813	100	4.0952	4	307	21	394.54	19.88
15.6	0.75026	0	8.14	0	0.538	5.924	94.1	4.3996	4	307	21	394.33	16.3
13.9	0.84054	0	8.14	0	0.538	5.599	85.7	4.4546	4	307	21	303.42	16.51
16.6	0.67191	0	8.14	0	0.538	5.813	90.3	4.682	4	307	21	376.88	14.81
14.8	0.95577	0	8.14	0	0.538	6.047	88.8	4.4534	4	307	21	306.38	17.28
18.4	0.77299	0	8.14	0	0.538	6.495	94.4	4.4547	4	307	21	387.94	12.8
21	1.00245	0	8.14	0	0.538	6.674	87.3	4.239	4	307	21	380.23	11.98
12.7	1.13081	0	8.14	0	0.538	5.713	94.1	4.233	4	307	21	360.17	22.6
14.5	1.35472	0	8.14	0	0.538	6.072	100	4.175	4	307	21	376.73	13.04
13.2	1.38799	0	8.14	0	0.538	5.95	82	3.99	4	307	21	232.6	27.71
13.1	1.15172	0	8.14	0	0.538	5.701	95	3.7872	4	307	21	358.77	18.35
13.5	1.61282	0	8.14	0	0.538	6.096	96.9	3.7598	4	307	21	248.31	20.34
18.9	0.06417	0	5.96	0	0.499	5.933	68.2	3.3603	5	279	19.2	396.9	9.68
20	0.09744	0	5.96	0	0.499	5.841	61.4	3.3779	5	279	19.2	377.56	11.41
21	0.08014	0	5.96	0	0.499	5.85	41.5	3.9342	5	279	19.2	396.9	8.77
24.7	0.17505	0	5.96	0	0.499	5.966	30.2	3.8473	5	279	19.2	393.43	10.13
30.8	0.02763	75	2.95	0	0.428	6.595	21.8	5.4011	3	252	18.3	395.63	4.32
34.9	0.03359	75	2.95	0	0.428	7.024	15.8	5.4011	3	252	18.3	395.62	1.98
26.6	0.12744	0	6.91	0	0.448	6.77	2.9	5.7209	3	233	17.9	385.41	4.84
25.3	0.1415	0	6.91	0	0.448	6.169	6.6	5.7209	3	233	17.9	383.37	5.81
24.7	0.15936	0	6.91	0	0.448	6.211	6.5	5.7209	3	233	17.9	394.46	7.44
21.2	0.12269	0	6.91	0	0.448	6.069	40	5.7209	3	233	17.9	389.39	9.55
19.3	0.17142	0	6.91	0	0.448	5.682	33.8	5.1004	3	233	17.9	396.9	10.21
20	0.18836	0	6.91	0	0.448	5.786	33.3	5.1004	3	233	17.9	396.9	14.15
16.6	0.22927	0	6.91	0	0.448	6.03	85.5	5.6894	3	233	17.9	392.74	18.8
14.4	0.25387	0	6.91	0	0.448	5.399	95.3	5.87	3	233	17.9	396.9	30.81
19.4	0.21977	0	6.91	0	0.448	5.602	62	6.0877	3	233	17.9	396.9	16.2
19.7	0.08873	21	5.64	0	0.439	5.963	45.7	6.8147	4	243	16.8	395.56	13.45
20.5	0.04337	21	5.64	0	0.439	6.115	63	6.8147	4	243	16.8	393.97	9.43
25	0.0536	21	5.64	0	0.439	6.511	21.1	6.8147	4	243	16.8	396.9	5.28
23.4	0.04981	21	5.64	0	0.439	5.998	21.4	6.8147	4	243	16.8	396.9	8.43
18.9	0.0136	75	4	0	0.41	5.888	47.6	7.3197	3	469	21.1	396.9	14.8
35.4	0.01311	90	1.22	0	0.403	7.249	21.9	8.6966	5	226	17.9	395.93	4.81
24.7	0.02055	85	0.74	0	0.41	6.383	35.7	9.1876	2	313	17.3	396.9	5.77
31.6	0.01432	100	1.32	0	0.411	6.816	40.5	8.3248	5	256	15.1	392.9	3.95
23.3	0.15445	25	5.13	0	0.453	6.145	29.2	7.8148	8	284	19.7	390.68	6.86
19.6	0.10328	25	5.13	0	0.453	5.927	47.2	6.932	8	284	19.7	396.9	9.22
18.7	0.14932	25	5.13	0	0.453	5.741	66.2	7.2254	8	284	19.7	395.11	13.15
16	0.17171	25	5.13	0	0.453	5.966	93.4	6.8185	8	284	19.7	378.08	14.44
22.2	0.11027	25	5.13	0	0.453	6.456	67.8	7.2255	8	284	19.7	396.9	6.73
25	0.1265	25	5.13	0	0.453	6.762	43.4	7.9809	8	284	19.7	395.58	9.5
33	0.01951	17.5	1.38	0	0.4161	7.104	59.5	9.2229	3	216	18.6	393.24	8.05
23.5	0.03584	80	3.37	0	0.398	6.29	17.8	6.6115	4	337	16.1	396.9	4.67
19.4	0.04379	80	3.37	0	0.398	5.787	31.1	6.6115	4	337	16.1	396.9	10.24
22	0.05789	12.5	6.07	0	0.409	5.878	21.4	6.498	4	345	18.9	396.21	8.1
17.4	0.13554	12.5	6.07	0	0.409	5.594	36.8	6.498	4	345	18.9	396.9	13.09
20.9	0.12816	12.5	6.07	0	0.409	5.885	33	6.498	4	345	18.9	396.9	8.79
24.2	0.08826	0	10.81	0	0.413	6.417	6.6	5.2873	4	305	19.2	383.73	6.72
21.7	0.15876	0	10.81	0	0.413	5.961	17.5	5.2873	4	305	19.2	376.94	9.88
22.8	0.09164	0	10.81	0	0.413	6.065	7.8	5.2873	4	305	19.2	390.91	5.52
23.4	0.19539	0	10.81	0	0.413	6.245	6.2	5.2873	4	305	19.2	377.17	7.54
24.1	0.07896	0	12.83	0	0.437	6.273	6	4.2515	5	398	18.7	394.92	6.78
21.4	0.09512	0	12.83	0	0.437	6.286	45	4.5026	5	398	18.7	383.23	8.94
20	0.10153	0	12.83	0	0.437	6.279	74.5	4.0522	5	398	18.7	373.66	11.97
20.8	0.08707	0	12.83	0	0.437	6.14	45.8	4.0905	5	398	18.7	386.96	10.27
21.2	0.05646	0	12.83	0	0.437	6.232	53.7	5.0141	5	398	18.7	386.4	12.34
20.3	0.08387	0	12.83	0	0.437	5.874	36.6	4.5026	5	398	18.7	396.06	9.1
28	0.04113	25	4.86	0	0.426	6.727	33.5	5.4007	4	281	19	396.9	5.29
23.9	0.04462	25	4.86	0	0.426	6.619	70.4	5.4007	4	281	19	395.63	7.22
24.8	0.03659	25	4.86	0	0.426	6.302	32.2	5.4007	4	281	19	396.9	6.72
22.9	0.03551	25	4.86	0	0.426	6.167	46.7	5.4007	4	281	19	390.64	7.51
23.9	0.05059	0	4.49	0	0.449	6.389	48	4.7794	3	247	18.5	396.9	9.62
26.6	0.05735	0	4.49	0	0.449	6.63	56.1	4.4377	3	247	18.5	392.3	6.53
22.5	0.05188	0	4.49	0	0.449	6.015	45.1	4.4272	3	247	18.5	395.99	12.86
22.2	0.07151	0	4.49	0	0.449	6.121	56.8	3.7476	3	247	18.5	395.15	8.44
23.6	0.0566	0	3.41	0	0.489	7.007	86.3	3.4217	2	270	17.8	396.9	5.5
28.7	0.05302	0	3.41	0	0.489	7.079	63.1	3.4145	2	270	17.8	396.06	5.7
22.6	0.04684	0	3.41	0	0.489	6.417	66.1	3.0923	2	270	17.8	392.18	8.81
22	0.03932	0	3.41	0	0.489	6.405	73.9	3.0921	2	270	17.8	393.55	8.2
22.9	0.04203	28	15.04	0	0.464	6.442	53.6	3.6659	4	270	18.2	395.01	8.16
25	0.02875	28	15.04	0	0.464	6.211	28.9	3.6659	4	270	18.2	396.33	6.21
20.6	0.04294	28	15.04	0	0.464	6.249	77.3	3.615	4	270	18.2	396.9	10.59
28.4	0.12204	0	2.89	0	0.445	6.625	57.8	3.4952	2	276	18	357.98	6.65
21.4	0.11504	0	2.89	0	0.445	6.163	69.6	3.4952	2	276	18	391.83	11.34
38.7	0.12083	0	2.89	0	0.445	8.069	76	3.4952	2	276	18	396.9	4.21
43.8	0.08187	0	2.89	0	0.445	7.82	36.9	3.4952	2	276	18	393.53	3.57
33.2	0.0686	0	2.89	0	0.445	7.416	62.5	3.4952	2	276	18	396.9	6.19
27.5	0.14866	0	8.56	0	0.52	6.727	79.9	2.7778	5	384	20.9	394.76	9.42
26.5	0.11432	0	8.56	0	0.52	6.781	71.3	2.8561	5	384	20.9	395.58	7.67
18.6	0.22876	0	8.56	0	0.52	6.405	85.4	2.7147	5	384	20.9	70.8	10.63
19.3	0.21161	0	8.56	0	0.52	6.137	87.4	2.7147	5	384	20.9	394.47	13.44
20.1	0.1396	0	8.56	0	0.52	6.167	90	2.421	5	384	20.9	392.69	12.33
19.5	0.13262	0	8.56	0	0.52	5.851	96.7	2.1069	5	384	20.9	394.05	16.47
19.5	0.1712	0	8.56	0	0.52	5.836	91.9	2.211	5	384	20.9	395.67	18.66
20.4	0.13117	0	8.56	0	0.52	6.127	85.2	2.1224	5	384	20.9	387.69	14.09
19.8	0.12802	0	8.56	0	0.52	6.474	97.1	2.4329	5	384	20.9	395.24	12.27
19.4	0.26363	0	8.56	0	0.52	6.229	91.2	2.5451	5	384	20.9	391.23	15.55
21.7	0.10793	0	8.56	0	0.52	6.195	54.4	2.7778	5	384	20.9	393.49	13
22.8	0.10084	0	10.01	0	0.547	6.715	81.6	2.6775	6	432	17.8	395.59	10.16
18.8	0.12329	0	10.01	0	0.547	5.913	92.9	2.3534	6	432	17.8	394.95	16.21
18.7	0.22212	0	10.01	0	0.547	6.092	95.4	2.548	6	432	17.8	396.9	17.09
18.5	0.14231	0	10.01	0	0.547	6.254	84.2	2.2565	6	432	17.8	388.74	10.45
18.3	0.17134	0	10.01	0	0.547	5.928	88.2	2.4631	6	432	17.8	344.91	15.76
21.2	0.13158	0	10.01	0	0.547	6.176	72.5	2.7301	6	432	17.8	393.3	12.04
19.2	0.15098	0	10.01	0	0.547	6.021	82.6	2.7474	6	432	17.8	394.51	10.3
20.4	0.13058	0	10.01	0	0.547	5.872	73.1	2.4775	6	432	17.8	338.63	15.37
19.3	0.14476	0	10.01	0	0.547	5.731	65.2	2.7592	6	432	17.8	391.5	13.61
22	0.06899	0	25.65	0	0.581	5.87	69.7	2.2577	2	188	19.1	389.15	14.37
20.3	0.07165	0	25.65	0	0.581	6.004	84.1	2.1974	2	188	19.1	377.67	14.27
20.5	0.09299	0	25.65	0	0.581	5.961	92.9	2.0869	2	188	19.1	378.09	17.93
17.3	0.15038	0	25.65	0	0.581	5.856	97	1.9444	2	188	19.1	370.31	25.41
18.8	0.09849	0	25.65	0	0.581	5.879	95.8	2.0063	2	188	19.1	379.38	17.58
21.4	0.16902	0	25.65	0	0.581	5.986	88.4	1.9929	2	188	19.1	385.02	14.81
15.7	0.38735	0	25.65	0	0.581	5.613	95.6	1.7572	2	188	19.1	359.29	27.26
16.2	0.25915	0	21.89	0	0.624	5.693	96	1.7883	4	437	21.2	392.11	17.19
18	0.32543	0	21.89	0	0.624	6.431	98.8	1.8125	4	437	21.2	396.9	15.39
14.3	0.88125	0	21.89	0	0.624	5.637	94.7	1.9799	4	437	21.2	396.9	18.34
19.2	0.34006	0	21.89	0	0.624	6.458	98.9	2.1185	4	437	21.2	395.04	12.6
19.6	1.19294	0	21.89	0	0.624	6.326	97.7	2.271	4	437	21.2	396.9	12.26
23	0.59005	0	21.89	0	0.624	6.372	97.9	2.3274	4	437	21.2	385.76	11.12
18.4	0.32982	0	21.89	0	0.624	5.822	95.4	2.4699	4	437	21.2	388.69	15.03
15.6	0.97617	0	21.89	0	0.624	5.757	98.4	2.346	4	437	21.2	262.76	17.31
18.1	0.55778	0	21.89	0	0.624	6.335	98.2	2.1107	4	437	21.2	394.67	16.96
17.4	0.32264	0	21.89	0	0.624	5.942	93.5	1.9669	4	437	21.2	378.25	16.9
17.1	0.35233	0	21.89	0	0.624	6.454	98.4	1.8498	4	437	21.2	394.08	14.59
13.3	0.2498	0	21.89	0	0.624	5.857	98.2	1.6686	4	437	21.2	392.04	21.32
17.8	0.54452	0	21.89	0	0.624	6.151	97.9	1.6687	4	437	21.2	396.9	18.46
14	0.2909	0	21.89	0	0.624	6.174	93.6	1.6119	4	437	21.2	388.08	24.16
14.4	1.62864	0	21.89	0	0.624	5.019	100	1.4394	4	437	21.2	396.9	34.41
13.4	3.32105	0	19.58	1	0.871	5.403	100	1.3216	5	403	14.7	396.9	26.82
15.6	4.0974	0	19.58	0	0.871	5.468	100	1.4118	5	403	14.7	396.9	26.42
11.8	2.77974	0	19.58	0	0.871	4.903	97.8	1.3459	5	403	14.7	396.9	29.29
13.8	2.37934	0	19.58	0	0.871	6.13	100	1.4191	5	403	14.7	172.91	27.8
15.6	2.15505	0	19.58	0	0.871	5.628	100	1.5166	5	403	14.7	169.27	16.65
14.6	2.36862	0	19.58	0	0.871	4.926	95.7	1.4608	5	403	14.7	391.71	29.53
17.8	2.33099	0	19.58	0	0.871	5.186	93.8	1.5296	5	403	14.7	356.99	28.32
15.4	2.73397	0	19.58	0	0.871	5.597	94.9	1.5257	5	403	14.7	351.85	21.45
21.5	1.6566	0	19.58	0	0.871	6.122	97.3	1.618	5	403	14.7	372.8	14.1
19.6	1.49632	0	19.58	0	0.871	5.404	100	1.5916	5	403	14.7	341.6	13.28
15.3	1.12658	0	19.58	1	0.871	5.012	88	1.6102	5	403	14.7	343.28	12.12
19.4	2.14918	0	19.58	0	0.871	5.709	98.5	1.6232	5	403	14.7	261.95	15.79
17	1.41385	0	19.58	1	0.871	6.129	96	1.7494	5	403	14.7	321.02	15.12
15.6	3.53501	0	19.58	1	0.871	6.152	82.6	1.7455	5	403	14.7	88.01	15.02
13.1	2.44668	0	19.58	0	0.871	5.272	94	1.7364	5	403	14.7	88.63	16.14
41.3	1.22358	0	19.58	0	0.605	6.943	97.4	1.8773	5	403	14.7	363.43	4.59
24.3	1.34284	0	19.58	0	0.605	6.066	100	1.7573	5	403	14.7	353.89	6.43
23.3	1.42502	0	19.58	0	0.871	6.51	100	1.7659	5	403	14.7	364.31	7.39
27	1.27346	0	19.58	1	0.605	6.25	92.6	1.7984	5	403	14.7	338.92	5.5
50	1.46336	0	19.58	0	0.605	7.489	90.8	1.9709	5	403	14.7	374.43	1.73
50	1.83377	0	19.58	1	0.605	7.802	98.2	2.0407	5	403	14.7	389.61	1.92
50	1.51902	0	19.58	1	0.605	8.375	93.9	2.162	5	403	14.7	388.45	3.32
22.7	2.24236	0	19.58	0	0.605	5.854	91.8	2.422	5	403	14.7	395.11	11.64
25	2.924	0	19.58	0	0.605	6.101	93	2.2834	5	403	14.7	240.16	9.81
50	2.01019	0	19.58	0	0.605	7.929	96.2	2.0459	5	403	14.7	369.3	3.7
23.8	1.80028	0	19.58	0	0.605	5.877	79.2	2.4259	5	403	14.7	227.61	12.14
23.8	2.3004	0	19.58	0	0.605	6.319	96.1	2.1	5	403	14.7	297.09	11.1
22.3	2.44953	0	19.58	0	0.605	6.402	95.2	2.2625	5	403	14.7	330.04	11.32
17.4	1.20742	0	19.58	0	0.605	5.875	94.6	2.4259	5	403	14.7	292.29	14.43
19.1	2.3139	0	19.58	0	0.605	5.88	97.3	2.3887	5	403	14.7	348.13	12.03
23.1	0.13914	0	4.05	0	0.51	5.572	88.5	2.5961	5	296	16.6	396.9	14.69
23.6	0.09178	0	4.05	0	0.51	6.416	84.1	2.6463	5	296	16.6	395.5	9.04
22.6	0.08447	0	4.05	0	0.51	5.859	68.7	2.7019	5	296	16.6	393.23	9.64
29.4	0.06664	0	4.05	0	0.51	6.546	33.1	3.1323	5	296	16.6	390.96	5.33
23.2	0.07022	0	4.05	0	0.51	6.02	47.2	3.5549	5	296	16.6	393.23	10.11
24.6	0.05425	0	4.05	0	0.51	6.315	73.4	3.3175	5	296	16.6	395.6	6.29
29.9	0.06642	0	4.05	0	0.51	6.86	74.4	2.9153	5	296	16.6	391.27	6.92
37.2	0.0578	0	2.46	0	0.488	6.98	58.4	2.829	3	193	17.8	396.9	5.04
39.8	0.06588	0	2.46	0	0.488	7.765	83.3	2.741	3	193	17.8	395.56	7.56
36.2	0.06888	0	2.46	0	0.488	6.144	62.2	2.5979	3	193	17.8	396.9	9.45
37.9	0.09103	0	2.46	0	0.488	7.155	92.2	2.7006	3	193	17.8	394.12	4.82
32.5	0.10008	0	2.46	0	0.488	6.563	95.6	2.847	3	193	17.8	396.9	5.68
26.4	0.08308	0	2.46	0	0.488	5.604	89.8	2.9879	3	193	17.8	391	13.98
29.6	0.06047	0	2.46	0	0.488	6.153	68.8	3.2797	3	193	17.8	387.11	13.15
50	0.05602	0	2.46	0	0.488	7.831	53.6	3.1992	3	193	17.8	392.63	4.45
32	0.07875	45	3.44	0	0.437	6.782	41.1	3.7886	5	398	15.2	393.87	6.68
29.8	0.12579	45	3.44	0	0.437	6.556	29.1	4.5667	5	398	15.2	382.84	4.56
34.9	0.0837	45	3.44	0	0.437	7.185	38.9	4.5667	5	398	15.2	396.9	5.39
37	0.09068	45	3.44	0	0.437	6.951	21.5	6.4798	5	398	15.2	377.68	5.1
30.5	0.06911	45	3.44	0	0.437	6.739	30.8	6.4798	5	398	15.2	389.71	4.69
36.4	0.08664	45	3.44	0	0.437	7.178	26.3	6.4798	5	398	15.2	390.49	2.87
31.1	0.02187	60	2.93	0	0.401	6.8	9.9	6.2196	1	265	15.6	393.37	5.03
29.1	0.01439	60	2.93	0	0.401	6.604	18.8	6.2196	1	265	15.6	376.7	4.38
50	0.01381	80	0.46	0	0.422	7.875	32	5.6484	4	255	14.4	394.23	2.97
33.3	0.04011	80	1.52	0	0.404	7.287	34.1	7.309	2	329	12.6	396.9	4.08
30.3	0.04666	80	1.52	0	0.404	7.107	36.6	7.309	2	329	12.6	354.31	8.61
34.6	0.03768	80	1.52	0	0.404	7.274	38.3	7.309	2	329	12.6	392.2	6.62
34.9	0.0315	95	1.47	0	0.403	6.975	15.3	7.6534	3	402	17	396.9	4.56
32.9	0.01778	95	1.47	0	0.403	7.135	13.9	7.6534	3	402	17	384.3	4.45
24.1	0.03445	82.5	2.03	0	0.415	6.162	38.4	6.27	2	348	14.7	393.77	7.43
42.3	0.02177	82.5	2.03	0	0.415	7.61	15.7	6.27	2	348	14.7	395.38	3.11
48.5	0.0351	95	2.68	0	0.4161	7.853	33.2	5.118	4	224	14.7	392.78	3.81
50	0.02009	95	2.68	0	0.4161	8.034	31.9	5.118	4	224	14.7	390.55	2.88
22.6	0.13642	0	10.59	0	0.489	5.891	22.3	3.9454	4	277	18.6	396.9	10.87
24.4	0.22969	0	10.59	0	0.489	6.326	52.5	4.3549	4	277	18.6	394.87	10.97
22.5	0.25199	0	10.59	0	0.489	5.783	72.7	4.3549	4	277	18.6	389.43	18.06
24.4	0.13587	0	10.59	1	0.489	6.064	59.1	4.2392	4	277	18.6	381.32	14.66
20	0.43571	0	10.59	1	0.489	5.344	100	3.875	4	277	18.6	396.9	23.09
21.7	0.17446	0	10.59	1	0.489	5.96	92.1	3.8771	4	277	18.6	393.25	17.27
19.3	0.37578	0	10.59	1	0.489	5.404	88.6	3.665	4	277	18.6	395.24	23.98
22.4	0.21719	0	10.59	1	0.489	5.807	53.8	3.6526	4	277	18.6	390.94	16.03
28.1	0.14052	0	10.59	0	0.489	6.375	32.3	3.9454	4	277	18.6	385.81	9.38
23.7	0.28955	0	10.59	0	0.489	5.412	9.8	3.5875	4	277	18.6	348.93	29.55
25	0.19802	0	10.59	0	0.489	6.182	42.4	3.9454	4	277	18.6	393.63	9.47
23.3	0.0456	0	13.89	1	0.55	5.888	56	3.1121	5	276	16.4	392.8	13.51
28.7	0.07013	0	13.89	0	0.55	6.642	85.1	3.4211	5	276	16.4	392.78	9.69
21.5	0.11069	0	13.89	1	0.55	5.951	93.8	2.8893	5	276	16.4	396.9	17.92
23	0.11425	0	13.89	1	0.55	6.373	92.4	3.3633	5	276	16.4	393.74	10.5
26.7	0.35809	0	6.2	1	0.507	6.951	88.5	2.8617	8	307	17.4	391.7	9.71
21.7	0.40771	0	6.2	1	0.507	6.164	91.3	3.048	8	307	17.4	395.24	21.46
27.5	0.62356	0	6.2	1	0.507	6.879	77.7	3.2721	8	307	17.4	390.39	9.93
30.1	0.6147	0	6.2	0	0.507	6.618	80.8	3.2721	8	307	17.4	396.9	7.6
44.8	0.31533	0	6.2	0	0.504	8.266	78.3	2.8944	8	307	17.4	385.05	4.14
50	0.52693	0	6.2	0	0.504	8.725	83	2.8944	8	307	17.4	382	4.63
37.6	0.38214	0	6.2	0	0.504	8.04	86.5	3.2157	8	307	17.4	387.38	3.13
31.6	0.41238	0	6.2	0	0.504	7.163	79.9	3.2157	8	307	17.4	372.08	6.36
46.7	0.29819	0	6.2	0	0.504	7.686	17	3.3751	8	307	17.4	377.51	3.92
31.5	0.44178	0	6.2	0	0.504	6.552	21.4	3.3751	8	307	17.4	380.34	3.76
24.3	0.537	0	6.2	0	0.504	5.981	68.1	3.6715	8	307	17.4	378.35	11.65
31.7	0.46296	0	6.2	0	0.504	7.412	76.9	3.6715	8	307	17.4	376.14	5.25
41.7	0.57529	0	6.2	0	0.507	8.337	73.3	3.8384	8	307	17.4	385.91	2.47
48.3	0.33147	0	6.2	0	0.507	8.247	70.4	3.6519	8	307	17.4	378.95	3.95
29	0.44791	0	6.2	1	0.507	6.726	66.5	3.6519	8	307	17.4	360.2	8.05
24	0.33045	0	6.2	0	0.507	6.086	61.5	3.6519	8	307	17.4	376.75	10.88
25.1	0.52058	0	6.2	1	0.507	6.631	76.5	4.148	8	307	17.4	388.45	9.54
31.5	0.51183	0	6.2	0	0.507	7.358	71.6	4.148	8	307	17.4	390.07	4.73
23.7	0.08244	30	4.93	0	0.428	6.481	18.5	6.1899	6	300	16.6	379.41	6.36
23.3	0.09252	30	4.93	0	0.428	6.606	42.2	6.1899	6	300	16.6	383.78	7.37
22	0.11329	30	4.93	0	0.428	6.897	54.3	6.3361	6	300	16.6	391.25	11.38
20.1	0.10612	30	4.93	0	0.428	6.095	65.1	6.3361	6	300	16.6	394.62	12.4
22.2	0.1029	30	4.93	0	0.428	6.358	52.9	7.0355	6	300	16.6	372.75	11.22
23.7	0.12757	30	4.93	0	0.428	6.393	7.8	7.0355	6	300	16.6	374.71	5.19
17.6	0.20608	22	5.86	0	0.431	5.593	76.5	7.9549	7	330	19.1	372.49	12.5
18.5	0.19133	22	5.86	0	0.431	5.605	70.2	7.9549	7	330	19.1	389.13	18.46
24.3	0.33983	22	5.86	0	0.431	6.108	34.9	8.0555	7	330	19.1	390.18	9.16
20.5	0.19657	22	5.86	0	0.431	6.226	79.2	8.0555	7	330	19.1	376.14	10.15
24.5	0.16439	22	5.86	0	0.431	6.433	49.1	7.8265	7	330	19.1	374.71	9.52
26.2	0.19073	22	5.86	0	0.431	6.718	17.5	7.8265	7	330	19.1	393.74	6.56
24.4	0.1403	22	5.86	0	0.431	6.487	13	7.3967	7	330	19.1	396.28	5.9
24.8	0.21409	22	5.86	0	0.431	6.438	8.9	7.3967	7	330	19.1	377.07	3.59
29.6	0.08221	22	5.86	0	0.431	6.957	6.8	8.9067	7	330	19.1	386.09	3.53
42.8	0.36894	22	5.86	0	0.431	8.259	8.4	8.9067	7	330	19.1	396.9	3.54
21.9	0.04819	80	3.64	0	0.392	6.108	32	9.2203	1	315	16.4	392.89	6.57
20.9	0.03548	80	3.64	0	0.392	5.876	19.1	9.2203	1	315	16.4	395.18	9.25
44	0.01538	90	3.75	0	0.394	7.454	34.2	6.3361	3	244	15.9	386.34	3.11
50	0.61154	20	3.97	0	0.647	8.704	86.9	1.801	5	264	13	389.7	5.12
36	0.66351	20	3.97	0	0.647	7.333	100	1.8946	5	264	13	383.29	7.79
30.1	0.65665	20	3.97	0	0.647	6.842	100	2.0107	5	264	13	391.93	6.9
33.8	0.54011	20	3.97	0	0.647	7.203	81.8	2.1121	5	264	13	392.8	9.59
43.1	0.53412	20	3.97	0	0.647	7.52	89.4	2.1398	5	264	13	388.37	7.26
48.8	0.52014	20	3.97	0	0.647	8.398	91.5	2.2885	5	264	13	386.86	5.91
31	0.82526	20	3.97	0	0.647	7.327	94.5	2.0788	5	264	13	393.42	11.25
36.5	0.55007	20	3.97	0	0.647	7.206	91.6	1.9301	5	264	13	387.89	8.1
22.8	0.76162	20	3.97	0	0.647	5.56	62.8	1.9865	5	264	13	392.4	10.45
30.7	0.7857	20	3.97	0	0.647	7.014	84.6	2.1329	5	264	13	384.07	14.79
50	0.57834	20	3.97	0	0.575	8.297	67	2.4216	5	264	13	384.54	7.44
43.5	0.5405	20	3.97	0	0.575	7.47	52.6	2.872	5	264	13	390.3	3.16
20.7	0.09065	20	6.96	1	0.464	5.92	61.5	3.9175	3	223	18.6	391.34	13.65
21.1	0.29916	20	6.96	0	0.464	5.856	42.1	4.429	3	223	18.6	388.65	13
25.2	0.16211	20	6.96	0	0.464	6.24	16.3	4.429	3	223	18.6	396.9	6.59
24.4	0.1146	20	6.96	0	0.464	6.538	58.7	3.9175	3	223	18.6	394.96	7.73
35.2	0.22188	20	6.96	1	0.464	7.691	51.8	4.3665	3	223	18.6	390.77	6.58
32.4	0.05644	40	6.41	1	0.447	6.758	32.9	4.0776	4	254	17.6	396.9	3.53
32	0.09604	40	6.41	0	0.447	6.854	42.8	4.2673	4	254	17.6	396.9	2.98
33.2	0.10469	40	6.41	1	0.447	7.267	49	4.7872	4	254	17.6	389.25	6.05
33.1	0.06127	40	6.41	1	0.447	6.826	27.6	4.8628	4	254	17.6	393.45	4.16
29.1	0.07978	40	6.41	0	0.447	6.482	32.1	4.1403	4	254	17.6	396.9	7.19
35.1	0.21038	20	3.33	0	0.4429	6.812	32.2	4.1007	5	216	14.9	396.9	4.85
45.4	0.03578	20	3.33	0	0.4429	7.82	64.5	4.6947	5	216	14.9	387.31	3.76
35.4	0.03705	20	3.33	0	0.4429	6.968	37.2	5.2447	5	216	14.9	392.23	4.59
46	0.06129	20	3.33	1	0.4429	7.645	49.7	5.2119	5	216	14.9	377.07	3.01
50	0.01501	90	1.21	1	0.401	7.923	24.8	5.885	1	198	13.6	395.52	3.16
32.2	0.00906	90	2.97	0	0.4	7.088	20.8	7.3073	1	285	15.3	394.72	7.85
22	0.01096	55	2.25	0	0.389	6.453	31.9	7.3073	1	300	15.3	394.72	8.23
20.1	0.01965	80	1.76	0	0.385	6.23	31.5	9.0892	1	241	18.2	341.6	12.93
23.2	0.03871	52.5	5.32	0	0.405	6.209	31.3	7.3172	6	293	16.6	396.9	7.14
22.3	0.0459	52.5	5.32	0	0.405	6.315	45.6	7.3172	6	293	16.6	396.9	7.6
24.8	0.04297	52.5	5.32	0	0.405	6.565	22.9	7.3172	6	293	16.6	371.72	9.51
28.5	0.03502	80	4.95	0	0.411	6.861	27.9	5.1167	4	245	19.2	396.9	3.33
37.3	0.07886	80	4.95	0	0.411	7.148	27.7	5.1167	4	245	19.2	396.9	3.56
27.9	0.03615	80	4.95	0	0.411	6.63	23.4	5.1167	4	245	19.2	396.9	4.7
23.9	0.08265	0	13.92	0	0.437	6.127	18.4	5.5027	4	289	16	396.9	8.58
21.7	0.08199	0	13.92	0	0.437	6.009	42.3	5.5027	4	289	16	396.9	10.4
28.6	0.12932	0	13.92	0	0.437	6.678	31.1	5.9604	4	289	16	396.9	6.27
27.1	0.05372	0	13.92	0	0.437	6.549	51	5.9604	4	289	16	392.85	7.39
20.3	0.14103	0	13.92	0	0.437	5.79	58	6.32	4	289	16	396.9	15.84
22.5	0.06466	70	2.24	0	0.4	6.345	20.1	7.8278	5	358	14.8	368.24	4.97
29	0.05561	70	2.24	0	0.4	7.041	10	7.8278	5	358	14.8	371.58	4.74
24.8	0.04417	70	2.24	0	0.4	6.871	47.4	7.8278	5	358	14.8	390.86	6.07
22	0.03537	34	6.09	0	0.433	6.59	40.4	5.4917	7	329	16.1	395.75	9.5
26.4	0.09266	34	6.09	0	0.433	6.495	18.4	5.4917	7	329	16.1	383.61	8.67
33.1	0.1	34	6.09	0	0.433	6.982	17.7	5.4917	7	329	16.1	390.43	4.86
36.1	0.05515	33	2.18	0	0.472	7.236	41.1	4.022	7	222	18.4	393.68	6.93
28.4	0.05479	33	2.18	0	0.472	6.616	58.1	3.37	7	222	18.4	393.36	8.93
33.4	0.07503	33	2.18	0	0.472	7.42	71.9	3.0992	7	222	18.4	396.9	6.47
28.2	0.04932	33	2.18	0	0.472	6.849	70.3	3.1827	7	222	18.4	396.9	7.53
22.8	0.49298	0	9.9	0	0.544	6.635	82.5	3.3175	4	304	18.4	396.9	4.54
20.3	0.3494	0	9.9	0	0.544	5.972	76.7	3.1025	4	304	18.4	396.24	9.97
16.1	2.63548	0	9.9	0	0.544	4.973	37.8	2.5194	4	304	18.4	350.45	12.64
22.1	0.79041	0	9.9	0	0.544	6.122	52.8	2.6403	4	304	18.4	396.9	5.98
19.4	0.26169	0	9.9	0	0.544	6.023	90.4	2.834	4	304	18.4	396.3	11.72
21.6	0.26938	0	9.9	0	0.544	6.266	82.8	3.2628	4	304	18.4	393.39	7.9
23.8	0.3692	0	9.9	0	0.544	6.567	87.3	3.6023	4	304	18.4	395.69	9.28
16.2	0.25356	0	9.9	0	0.544	5.705	77.7	3.945	4	304	18.4	396.42	11.5
17.8	0.31827	0	9.9	0	0.544	5.914	83.2	3.9986	4	304	18.4	390.7	18.33
19.8	0.24522	0	9.9	0	0.544	5.782	71.7	4.0317	4	304	18.4	396.9	15.94
23.1	0.40202	0	9.9	0	0.544	6.382	67.2	3.5325	4	304	18.4	395.21	10.36
21	0.47547	0	9.9	0	0.544	6.113	58.8	4.0019	4	304	18.4	396.23	12.73
23.8	0.1676	0	7.38	0	0.493	6.426	52.3	4.5404	5	287	19.6	396.9	7.2
23.1	0.18159	0	7.38	0	0.493	6.376	54.3	4.5404	5	287	19.6	396.9	6.87
20.4	0.35114	0	7.38	0	0.493	6.041	49.9	4.7211	5	287	19.6	396.9	7.7
18.5	0.28392	0	7.38	0	0.493	5.708	74.3	4.7211	5	287	19.6	391.13	11.74
25	0.34109	0	7.38	0	0.493	6.415	40.1	4.7211	5	287	19.6	396.9	6.12
24.6	0.19186	0	7.38	0	0.493	6.431	14.7	5.4159	5	287	19.6	393.68	5.08
23	0.30347	0	7.38	0	0.493	6.312	28.9	5.4159	5	287	19.6	396.9	6.15
22.2	0.24103	0	7.38	0	0.493	6.083	43.7	5.4159	5	287	19.6	396.9	12.79
19.3	0.06617	0	3.24	0	0.46	5.868	25.8	5.2146	4	430	16.9	382.44	9.97
22.6	0.06724	0	3.24	0	0.46	6.333	17.2	5.2146	4	430	16.9	375.21	7.34
19.8	0.04544	0	3.24	0	0.46	6.144	32.2	5.8736	4	430	16.9	368.57	9.09
17.1	0.05023	35	6.06	0	0.4379	5.706	28.4	6.6407	1	304	16.9	394.02	12.43
19.4	0.03466	35	6.06	0	0.4379	6.031	23.3	6.6407	1	304	16.9	362.25	7.83
22.2	0.05083	0	5.19	0	0.515	6.316	38.1	6.4584	5	224	20.2	389.71	5.68
20.7	0.03738	0	5.19	0	0.515	6.31	38.5	6.4584	5	224	20.2	389.4	6.75
21.1	0.03961	0	5.19	0	0.515	6.037	34.5	5.9853	5	224	20.2	396.9	8.01
19.5	0.03427	0	5.19	0	0.515	5.869	46.3	5.2311	5	224	20.2	396.9	9.8
18.5	0.03041	0	5.19	0	0.515	5.895	59.6	5.615	5	224	20.2	394.81	10.56
20.6	0.03306	0	5.19	0	0.515	6.059	37.3	4.8122	5	224	20.2	396.14	8.51
19	0.05497	0	5.19	0	0.515	5.985	45.4	4.8122	5	224	20.2	396.9	9.74
18.7	0.06151	0	5.19	0	0.515	5.968	58.5	4.8122	5	224	20.2	396.9	9.29
32.7	0.01301	35	1.52	0	0.442	7.241	49.3	7.0379	1	284	15.5	394.74	5.49
16.5	0.02498	0	1.89	0	0.518	6.54	59.7	6.2669	1	422	15.9	389.96	8.65
23.9	0.02543	55	3.78	0	0.484	6.696	56.4	5.7321	5	370	17.6	396.9	7.18
31.2	0.03049	55	3.78	0	0.484	6.874	28.1	6.4654	5	370	17.6	387.97	4.61
17.5	0.03113	0	4.39	0	0.442	6.014	48.5	8.0136	3	352	18.8	385.64	10.53
17.2	0.06162	0	4.39	0	0.442	5.898	52.3	8.0136	3	352	18.8	364.61	12.67
23.1	0.0187	85	4.15	0	0.429	6.516	27.7	8.5353	4	351	17.9	392.43	6.36
24.5	0.01501	80	2.01	0	0.435	6.635	29.7	8.344	4	280	17	390.94	5.99
26.6	0.02899	40	1.25	0	0.429	6.939	34.5	8.7921	1	335	19.7	389.85	5.89
22.9	0.06211	40	1.25	0	0.429	6.49	44.4	8.7921	1	335	19.7	396.9	5.98
24.1	0.0795	60	1.69	0	0.411	6.579	35.9	10.7103	4	411	18.3	370.78	5.49
18.6	0.07244	60	1.69	0	0.411	5.884	18.5	10.7103	4	411	18.3	392.33	7.79
30.1	0.01709	90	2.02	0	0.41	6.728	36.1	12.1265	5	187	17	384.46	4.5
18.2	0.04301	80	1.91	0	0.413	5.663	21.9	10.5857	4	334	22	382.8	8.05
20.6	0.10659	80	1.91	0	0.413	5.936	19.5	10.5857	4	334	22	376.04	5.57
17.8	8.98296	0	18.1	1	0.77	6.212	97.4	2.1222	24	666	20.2	377.73	17.6
21.7	3.8497	0	18.1	1	0.77	6.395	91	2.5052	24	666	20.2	391.34	13.27
22.7	5.20177	0	18.1	1	0.77	6.127	83.4	2.7227	24	666	20.2	395.43	11.48
22.6	4.26131	0	18.1	0	0.77	6.112	81.3	2.5091	24	666	20.2	390.74	12.67
25	4.54192	0	18.1	0	0.77	6.398	88	2.5182	24	666	20.2	374.56	7.79
19.9	3.83684	0	18.1	0	0.77	6.251	91.1	2.2955	24	666	20.2	350.65	14.19
20.8	3.67822	0	18.1	0	0.77	5.362	96.2	2.1036	24	666	20.2	380.79	10.19
16.8	4.22239	0	18.1	1	0.77	5.803	89	1.9047	24	666	20.2	353.04	14.64
21.9	3.47428	0	18.1	1	0.718	8.78	82.9	1.9047	24	666	20.2	354.55	5.29
27.5	4.55587	0	18.1	0	0.718	3.561	87.9	1.6132	24	666	20.2	354.7	7.12
21.9	3.69695	0	18.1	0	0.718	4.963	91.4	1.7523	24	666	20.2	316.03	14
23.1	13.5222	0	18.1	0	0.631	3.863	100	1.5106	24	666	20.2	131.42	13.33
50	4.89822	0	18.1	0	0.631	4.97	100	1.3325	24	666	20.2	375.52	3.26
50	5.66998	0	18.1	1	0.631	6.683	96.8	1.3567	24	666	20.2	375.33	3.73
50	6.53876	0	18.1	1	0.631	7.016	97.5	1.2024	24	666	20.2	392.05	2.96
50	9.2323	0	18.1	0	0.631	6.216	100	1.1691	24	666	20.2	366.15	9.53
50	8.26725	0	18.1	1	0.668	5.875	89.6	1.1296	24	666	20.2	347.88	8.88
13.8	11.1081	0	18.1	0	0.668	4.906	100	1.1742	24	666	20.2	396.9	34.77
13.8	18.4982	0	18.1	0	0.668	4.138	100	1.137	24	666	20.2	396.9	37.97
15	19.6091	0	18.1	0	0.671	7.313	97.9	1.3163	24	666	20.2	396.9	13.44
13.9	15.288	0	18.1	0	0.671	6.649	93.3	1.3449	24	666	20.2	363.02	23.24
13.3	9.82349	0	18.1	0	0.671	6.794	98.8	1.358	24	666	20.2	396.9	21.24
13.1	23.6482	0	18.1	0	0.671	6.38	96.2	1.3861	24	666	20.2	396.9	23.69
10.2	17.8667	0	18.1	0	0.671	6.223	100	1.3861	24	666	20.2	393.74	21.78
10.4	88.9762	0	18.1	0	0.671	6.968	91.9	1.4165	24	666	20.2	396.9	17.21
10.9	15.8744	0	18.1	0	0.671	6.545	99.1	1.5192	24	666	20.2	396.9	21.08
11.3	9.18702	0	18.1	0	0.7	5.536	100	1.5804	24	666	20.2	396.9	23.6
12.3	7.99248	0	18.1	0	0.7	5.52	100	1.5331	24	666	20.2	396.9	24.56
8.8	20.0849	0	18.1	0	0.7	4.368	91.2	1.4395	24	666	20.2	285.83	30.63
7.2	16.8118	0	18.1	0	0.7	5.277	98.1	1.4261	24	666	20.2	396.9	30.81
10.5	24.3938	0	18.1	0	0.7	4.652	100	1.4672	24	666	20.2	396.9	28.28
7.4	22.5971	0	18.1	0	0.7	5	89.5	1.5184	24	666	20.2	396.9	31.99
10.2	14.3337	0	18.1	0	0.7	4.88	100	1.5895	24	666	20.2	372.92	30.62
11.5	8.15174	0	18.1	0	0.7	5.39	98.9	1.7281	24	666	20.2	396.9	20.85
15.1	6.96215	0	18.1	0	0.7	5.713	97	1.9265	24	666	20.2	394.43	17.11
23.2	5.29305	0	18.1	0	0.7	6.051	82.5	2.1678	24	666	20.2	378.38	18.76
9.7	11.5779	0	18.1	0	0.7	5.036	97	1.77	24	666	20.2	396.9	25.68
13.8	8.64476	0	18.1	0	0.693	6.193	92.6	1.7912	24	666	20.2	396.9	15.17
12.7	13.3598	0	18.1	0	0.693	5.887	94.7	1.7821	24	666	20.2	396.9	16.35
13.1	8.71675	0	18.1	0	0.693	6.471	98.8	1.7257	24	666	20.2	391.98	17.12
12.5	5.87205	0	18.1	0	0.693	6.405	96	1.6768	24	666	20.2	396.9	19.37
8.5	7.67202	0	18.1	0	0.693	5.747	98.9	1.6334	24	666	20.2	393.1	19.92
5	38.3518	0	18.1	0	0.693	5.453	100	1.4896	24	666	20.2	396.9	30.59
6.3	9.91655	0	18.1	0	0.693	5.852	77.8	1.5004	24	666	20.2	338.16	29.97
5.6	25.0461	0	18.1	0	0.693	5.987	100	1.5888	24	666	20.2	396.9	26.77
7.2	14.2362	0	18.1	0	0.693	6.343	100	1.5741	24	666	20.2	396.9	20.32
12.1	9.59571	0	18.1	0	0.693	6.404	100	1.639	24	666	20.2	376.11	20.31
8.3	24.8017	0	18.1	0	0.693	5.349	96	1.7028	24	666	20.2	396.9	19.77
8.5	41.5292	0	18.1	0	0.693	5.531	85.4	1.6074	24	666	20.2	329.46	27.38
5	67.9208	0	18.1	0	0.693	5.683	100	1.4254	24	666	20.2	384.97	22.98
11.9	20.7162	0	18.1	0	0.659	4.138	100	1.1781	24	666	20.2	370.22	23.34
27.9	11.9511	0	18.1	0	0.659	5.608	100	1.2852	24	666	20.2	332.09	12.13
17.2	7.40389	0	18.1	0	0.597	5.617	97.9	1.4547	24	666	20.2	314.64	26.4
27.5	14.4383	0	18.1	0	0.597	6.852	100	1.4655	24	666	20.2	179.36	19.78
15	51.1358	0	18.1	0	0.597	5.757	100	1.413	24	666	20.2	2.6	10.11
17.2	14.0507	0	18.1	0	0.597	6.657	100	1.5275	24	666	20.2	35.05	21.22
17.9	18.811	0	18.1	0	0.597	4.628	100	1.5539	24	666	20.2	28.79	34.37
16.3	28.6558	0	18.1	0	0.597	5.155	100	1.5894	24	666	20.2	210.97	20.08
7	45.7461	0	18.1	0	0.693	4.519	100	1.6582	24	666	20.2	88.27	36.98
7.2	18.0846	0	18.1	0	0.679	6.434	100	1.8347	24	666	20.2	27.25	29.05
7.5	10.8342	0	18.1	0	0.679	6.782	90.8	1.8195	24	666	20.2	21.57	25.79
10.4	25.9406	0	18.1	0	0.679	5.304	89.1	1.6475	24	666	20.2	127.36	26.64
8.8	73.5341	0	18.1	0	0.679	5.957	100	1.8026	24	666	20.2	16.45	20.62
8.4	11.8123	0	18.1	0	0.718	6.824	76.5	1.794	24	666	20.2	48.45	22.74
16.7	11.0874	0	18.1	0	0.718	6.411	100	1.8589	24	666	20.2	318.75	15.02
14.2	7.02259	0	18.1	0	0.718	6.006	95.3	1.8746	24	666	20.2	319.98	15.7
20.8	12.0482	0	18.1	0	0.614	5.648	87.6	1.9512	24	666	20.2	291.55	14.1
13.4	7.05042	0	18.1	0	0.614	6.103	85.1	2.0218	24	666	20.2	2.52	23.29
11.7	8.79212	0	18.1	0	0.584	5.565	70.6	2.0635	24	666	20.2	3.65	17.16
8.3	15.8603	0	18.1	0	0.679	5.896	95.4	1.9096	24	666	20.2	7.68	24.39
10.2	12.2472	0	18.1	0	0.584	5.837	59.7	1.9976	24	666	20.2	24.65	15.69
10.9	37.6619	0	18.1	0	0.679	6.202	78.7	1.8629	24	666	20.2	18.82	14.52
11	7.36711	0	18.1	0	0.679	6.193	78.1	1.9356	24	666	20.2	96.73	21.52
9.5	9.33889	0	18.1	0	0.679	6.38	95.6	1.9682	24	666	20.2	60.72	24.08
14.5	8.49213	0	18.1	0	0.584	6.348	86.1	2.0527	24	666	20.2	83.45	17.64
14.1	10.0623	0	18.1	0	0.584	6.833	94.3	2.0882	24	666	20.2	81.33	19.69
16.1	6.44405	0	18.1	0	0.584	6.425	74.8	2.2004	24	666	20.2	97.95	12.03
14.3	5.58107	0	18.1	0	0.713	6.436	87.9	2.3158	24	666	20.2	100.19	16.22
11.7	13.9134	0	18.1	0	0.713	6.208	95	2.2222	24	666	20.2	100.63	15.17
13.4	11.1604	0	18.1	0	0.74	6.629	94.6	2.1247	24	666	20.2	109.85	23.27
9.6	14.4208	0	18.1	0	0.74	6.461	93.3	2.0026	24	666	20.2	27.49	18.05
8.7	15.1772	0	18.1	0	0.74	6.152	100	1.9142	24	666	20.2	9.32	26.45
8.4	13.6781	0	18.1	0	0.74	5.935	87.9	1.8206	24	666	20.2	68.95	34.02
12.8	9.39063	0	18.1	0	0.74	5.627	93.9	1.8172	24	666	20.2	396.9	22.88
10.5	22.0511	0	18.1	0	0.74	5.818	92.4	1.8662	24	666	20.2	391.45	22.11
17.1	9.72418	0	18.1	0	0.74	6.406	97.2	2.0651	24	666	20.2	385.96	19.52
18.4	5.66637	0	18.1	0	0.74	6.219	100	2.0048	24	666	20.2	395.69	16.59
15.4	9.96654	0	18.1	0	0.74	6.485	100	1.9784	24	666	20.2	386.73	18.85
10.8	12.8023	0	18.1	0	0.74	5.854	96.6	1.8956	24	666	20.2	240.52	23.79
11.8	10.6718	0	18.1	0	0.74	6.459	94.8	1.9879	24	666	20.2	43.06	23.98
14.9	6.28807	0	18.1	0	0.74	6.341	96.4	2.072	24	666	20.2	318.01	17.79
12.6	9.92485	0	18.1	0	0.74	6.251	96.6	2.198	24	666	20.2	388.52	16.44
14.1	9.32909	0	18.1	0	0.713	6.185	98.7	2.2616	24	666	20.2	396.9	18.13
13	7.52601	0	18.1	0	0.713	6.417	98.3	2.185	24	666	20.2	304.21	19.31
13.4	6.71772	0	18.1	0	0.713	6.749	92.6	2.3236	24	666	20.2	0.32	17.44
15.2	5.44114	0	18.1	0	0.713	6.655	98.2	2.3552	24	666	20.2	355.29	17.73
16.1	5.09017	0	18.1	0	0.713	6.297	91.8	2.3682	24	666	20.2	385.09	17.27
17.8	8.24809	0	18.1	0	0.713	7.393	99.3	2.4527	24	666	20.2	375.87	16.74
14.9	9.51363	0	18.1	0	0.713	6.728	94.1	2.4961	24	666	20.2	6.68	18.71
14.1	4.75237	0	18.1	0	0.713	6.525	86.5	2.4358	24	666	20.2	50.92	18.13
12.7	4.66883	0	18.1	0	0.713	5.976	87.9	2.5806	24	666	20.2	10.48	19.01
13.5	8.20058	0	18.1	0	0.713	5.936	80.3	2.7792	24	666	20.2	3.5	16.94
14.9	7.75223	0	18.1	0	0.713	6.301	83.7	2.7831	24	666	20.2	272.21	16.23
20	6.80117	0	18.1	0	0.713	6.081	84.4	2.7175	24	666	20.2	396.9	14.7
16.4	4.81213	0	18.1	0	0.713	6.701	90	2.5975	24	666	20.2	255.23	16.42
17.7	3.69311	0	18.1	0	0.713	6.376	88.4	2.5671	24	666	20.2	391.43	14.65
19.5	6.65492	0	18.1	0	0.713	6.317	83	2.7344	24	666	20.2	396.9	13.99
20.2	5.82115	0	18.1	0	0.713	6.513	89.9	2.8016	24	666	20.2	393.82	10.29
21.4	7.83932	0	18.1	0	0.655	6.209	65.4	2.9634	24	666	20.2	396.9	13.22
19.9	3.1636	0	18.1	0	0.655	5.759	48.2	3.0665	24	666	20.2	334.4	14.13
19	3.77498	0	18.1	0	0.655	5.952	84.7	2.8715	24	666	20.2	22.01	17.15
19.1	4.42228	0	18.1	0	0.584	6.003	94.5	2.5403	24	666	20.2	331.29	21.32
19.1	15.5757	0	18.1	0	0.58	5.926	71	2.9084	24	666	20.2	368.74	18.13
20.1	13.0751	0	18.1	0	0.58	5.713	56.7	2.8237	24	666	20.2	396.9	14.76
19.9	4.34879	0	18.1	0	0.58	6.167	84	3.0334	24	666	20.2	396.9	16.29
19.6	4.03841	0	18.1	0	0.532	6.229	90.7	3.0993	24	666	20.2	395.33	12.87
23.2	3.56868	0	18.1	0	0.58	6.437	75	2.8965	24	666	20.2	393.37	14.36
29.8	4.64689	0	18.1	0	0.614	6.98	67.6	2.5329	24	666	20.2	374.68	11.66
13.8	8.05579	0	18.1	0	0.584	5.427	95.4	2.4298	24	666	20.2	352.58	18.14
13.3	6.39312	0	18.1	0	0.584	6.162	97.4	2.206	24	666	20.2	302.76	24.1
16.7	4.87141	0	18.1	0	0.614	6.484	93.6	2.3053	24	666	20.2	396.21	18.68
12	15.0234	0	18.1	0	0.614	5.304	97.3	2.1007	24	666	20.2	349.48	24.91
14.6	10.233	0	18.1	0	0.614	6.185	96.7	2.1705	24	666	20.2	379.7	18.03
21.4	14.3337	0	18.1	0	0.614	6.229	88	1.9512	24	666	20.2	383.32	13.11
23	5.82401	0	18.1	0	0.532	6.242	64.7	3.4242	24	666	20.2	396.9	10.74
23.7	5.70818	0	18.1	0	0.532	6.75	74.9	3.3317	24	666	20.2	393.07	7.74
25	5.73116	0	18.1	0	0.532	7.061	77	3.4106	24	666	20.2	395.28	7.01
21.8	2.81838	0	18.1	0	0.532	5.762	40.3	4.0983	24	666	20.2	392.92	10.42
20.6	2.37857	0	18.1	0	0.583	5.871	41.9	3.724	24	666	20.2	370.73	13.34
21.2	3.67367	0	18.1	0	0.583	6.312	51.9	3.9917	24	666	20.2	388.62	10.58
19.1	5.69175	0	18.1	0	0.583	6.114	79.8	3.5459	24	666	20.2	392.68	14.98
20.6	4.83567	0	18.1	0	0.583	5.905	53.2	3.1523	24	666	20.2	388.22	11.45
15.2	0.15086	0	27.74	0	0.609	5.454	92.7	1.8209	4	711	20.1	395.09	18.06
7	0.18337	0	27.74	0	0.609	5.414	98.3	1.7554	4	711	20.1	344.05	23.97
8.1	0.20746	0	27.74	0	0.609	5.093	98	1.8226	4	711	20.1	318.43	29.68
13.6	0.10574	0	27.74	0	0.609	5.983	98.8	1.8681	4	711	20.1	390.11	18.07
20.1	0.11132	0	27.74	0	0.609	5.983	83.5	2.1099	4	711	20.1	396.9	13.35
21.8	0.17331	0	9.69	0	0.585	5.707	54	2.3817	6	391	19.2	396.9	12.01
24.5	0.27957	0	9.69	0	0.585	5.926	42.6	2.3817	6	391	19.2	396.9	13.59
23.1	0.17899	0	9.69	0	0.585	5.67	28.8	2.7986	6	391	19.2	393.29	17.6
19.7	0.2896	0	9.69	0	0.585	5.39	72.9	2.7986	6	391	19.2	396.9	21.14
18.3	0.26838	0	9.69	0	0.585	5.794	70.6	2.8927	6	391	19.2	396.9	14.1
21.2	0.23912	0	9.69	0	0.585	6.019	65.3	2.4091	6	391	19.2	396.9	12.92
17.5	0.17783	0	9.69	0	0.585	5.569	73.5	2.3999	6	391	19.2	395.77	15.1
16.8	0.22438	0	9.69	0	0.585	6.027	79.7	2.4982	6	391	19.2	396.9	14.33
22.4	0.06263	0	11.93	0	0.573	6.593	69.1	2.4786	1	273	21	391.99	9.67
20.6	0.04527	0	11.93	0	0.573	6.12	76.7	2.2875	1	273	21	396.9	9.08
23.9	0.06076	0	11.93	0	0.573	6.976	91	2.1675	1	273	21	396.9	5.64
22	0.10959	0	11.93	0	0.573	6.794	89.3	2.3889	1	273	21	393.45	6.48
11.9	0.04741	0	11.93	0	0.573	6.03	80.8	2.505	1	273	21	396.9	7.88
