# Supplementary material for: A methodology for the design of experiments in computational intelligence with multiple regression models
Source: PeerJ. 2016 Dec 1;4:e2721. doi: 10.7717/peerj.2721 (PMC5136129; doi:10.7717/peerj.2721)
Supplement: Data S1 — Datailed results from UC Irvine Machine Learning Repository (Housing, Machine CPU, Wine Quality, Automobile and Parkinson) and the 3 Use Cases (Protein Corona, Gajewicz Metal Oxides and Aquatic Toxicity) [file peerj-04-2721-s001.zip › 0_datasets/ds.MachineCPU.csv]

PRP	MYCT	MMIN	MMAX	CACH	CHMIN	CHMAX
198	125	256	6000	256	16	128
269	29	8000	32000	32	8	32
220	29	8000	32000	32	8	32
172	29	8000	32000	32	8	32
132	29	8000	16000	32	8	16
318	26	8000	32000	64	8	32
367	23	16000	32000	64	16	32
489	23	16000	32000	64	16	32
636	23	16000	64000	64	16	32
1144	23	32000	64000	128	32	64
38	400	1000	3000	0	1	2
40	400	512	3500	4	1	6
92	60	2000	8000	65	1	8
138	50	4000	16000	65	1	8
10	350	64	64	0	1	4
35	200	512	16000	0	4	32
19	167	524	2000	8	4	15
28	143	512	5000	0	7	32
31	143	1000	2000	0	5	16
120	110	5000	5000	142	8	64
30	143	1500	6300	0	5	32
33	143	3100	6200	0	5	20
61	143	2300	6200	0	6	64
76	110	3100	6200	0	6	64
23	320	128	6000	0	1	12
69	320	512	2000	4	1	3
33	320	256	6000	0	1	6
27	320	256	3000	4	1	3
77	320	512	5000	4	1	5
27	320	256	5000	4	1	6
274	25	1310	2620	131	12	24
368	25	1310	2620	131	12	24
32	50	2620	10480	30	12	24
63	50	2620	10480	30	12	24
106	56	5240	20970	30	12	24
208	64	5240	20970	30	12	24
20	50	500	2000	8	1	4
29	50	1000	4000	8	1	5
71	50	2000	8000	8	1	5
26	50	1000	4000	8	3	5
36	50	1000	8000	8	3	5
40	50	2000	16000	8	3	5
52	50	2000	16000	8	3	6
60	50	2000	16000	8	3	6
72	133	1000	12000	9	3	12
72	133	1000	8000	9	3	12
18	810	512	512	8	1	1
20	810	1000	5000	0	1	1
40	320	512	8000	4	1	5
62	200	512	8000	8	1	8
24	700	384	8000	0	1	1
24	700	256	2000	0	1	1
138	140	1000	16000	16	1	3
36	200	1000	8000	0	1	2
26	110	1000	4000	16	1	2
60	110	1000	12000	16	1	2
71	220	1000	8000	16	1	2
12	800	256	8000	0	1	4
14	800	256	8000	0	1	4
20	800	256	8000	0	1	4
16	800	256	8000	0	1	4
22	800	256	8000	0	1	4
36	125	512	1000	0	8	20
144	75	2000	8000	64	1	38
144	75	2000	16000	64	1	38
259	75	2000	16000	128	1	38
17	90	256	1000	0	3	10
26	105	256	2000	0	3	10
32	105	1000	4000	0	3	24
32	105	2000	4000	8	3	19
62	75	2000	8000	8	3	24
64	75	3000	8000	8	3	48
22	175	256	2000	0	3	24
36	300	768	3000	0	6	24
44	300	768	3000	6	6	24
50	300	768	12000	6	6	24
45	300	768	4500	0	1	24
53	300	384	12000	6	1	24
36	300	192	768	6	6	24
84	180	768	12000	6	1	31
16	330	1000	3000	0	2	4
38	300	1000	4000	8	3	64
38	300	1000	16000	8	2	112
16	330	1000	2000	0	1	2
22	330	1000	4000	0	3	6
29	140	2000	4000	0	3	6
40	140	2000	4000	0	4	8
35	140	2000	4000	8	1	20
134	140	2000	32000	32	1	20
66	140	2000	8000	32	1	54
141	140	2000	32000	32	1	54
189	140	2000	32000	32	1	54
22	140	2000	4000	8	1	20
132	57	4000	16000	1	6	12
237	57	4000	24000	64	12	16
465	26	16000	32000	64	16	24
465	26	16000	32000	64	8	24
277	26	8000	32000	0	8	24
185	26	8000	16000	0	8	16
6	480	96	512	0	1	1
24	203	1000	2000	0	1	5
45	115	512	6000	16	1	6
7	1100	512	1500	0	1	1
13	1100	768	2000	0	1	1
16	600	768	2000	0	1	1
32	400	2000	4000	0	1	1
32	400	4000	8000	0	1	1
11	900	1000	1000	0	1	2
11	900	512	1000	0	1	2
18	900	1000	4000	4	1	2
22	900	1000	4000	8	1	2
37	900	2000	4000	0	3	6
40	225	2000	4000	8	3	6
34	225	2000	4000	8	3	6
50	180	2000	8000	8	1	6
76	185	2000	16000	16	1	6
66	180	2000	16000	16	1	6
24	225	1000	4000	2	3	6
49	25	2000	12000	8	1	4
66	25	2000	12000	16	3	5
100	17	4000	16000	8	6	12
133	17	4000	16000	32	6	12
12	1500	768	1000	0	0	0
18	1500	768	2000	0	0	0
20	800	768	2000	0	0	0
27	50	2000	4000	0	3	6
45	50	2000	8000	8	3	6
56	50	2000	8000	8	1	6
70	50	2000	16000	24	1	6
80	50	2000	16000	24	1	6
136	50	8000	16000	48	1	10
16	100	1000	8000	0	2	6
26	100	1000	8000	24	2	6
32	100	1000	8000	24	3	6
45	50	2000	16000	12	3	16
54	50	2000	16000	24	6	16
65	50	2000	16000	24	6	16
30	150	512	4000	0	8	128
50	115	2000	8000	16	1	3
40	115	2000	4000	2	1	5
62	92	2000	8000	32	1	6
60	92	2000	8000	32	1	6
50	92	2000	8000	4	1	6
66	75	4000	16000	16	1	6
86	60	4000	16000	32	1	6
74	60	2000	16000	64	5	8
93	60	4000	16000	64	5	8
111	50	4000	16000	64	5	10
143	72	4000	16000	64	8	16
105	72	2000	8000	16	6	8
214	40	8000	16000	32	8	16
277	40	8000	32000	64	8	24
370	35	8000	32000	64	8	24
510	38	16000	32000	128	16	32
214	48	4000	24000	32	8	24
326	38	8000	32000	64	8	24
510	30	16000	32000	256	16	24
8	112	1000	1000	0	1	4
12	84	1000	2000	0	1	6
17	56	1000	4000	0	1	6
21	56	2000	6000	0	1	8
24	56	2000	8000	0	1	8
34	56	4000	8000	0	1	8
42	56	4000	12000	0	1	8
46	56	4000	16000	0	1	8
51	38	4000	8000	32	16	32
116	38	4000	8000	32	16	32
100	38	8000	16000	64	4	8
140	38	8000	24000	160	4	8
212	38	4000	16000	128	16	32
25	200	1000	2000	0	1	2
30	200	1000	4000	0	1	4
41	200	2000	8000	64	1	5
25	250	512	4000	0	1	7
50	250	512	4000	0	4	7
50	250	1000	16000	1	1	8
30	160	512	4000	2	1	5
32	160	512	2000	2	3	8
38	160	1000	4000	8	1	14
60	160	1000	8000	16	1	14
109	160	2000	8000	32	1	13
6	240	512	1000	8	1	3
11	240	512	2000	8	1	5
22	105	2000	4000	8	3	8
33	105	2000	6000	16	6	16
58	105	2000	8000	16	4	14
130	52	4000	16000	32	4	12
75	70	4000	12000	8	6	8
113	59	4000	12000	32	6	12
188	59	8000	16000	64	12	24
173	26	8000	24000	32	8	16
248	26	8000	32000	64	12	16
405	26	8000	32000	128	24	32
70	116	2000	8000	32	5	28
114	50	2000	32000	24	6	26
208	50	2000	32000	48	26	52
307	50	2000	32000	112	52	104
397	50	4000	32000	112	52	104
915	30	8000	64000	96	12	176
1150	30	8000	64000	128	12	176
12	180	262	4000	0	1	3
14	180	512	4000	0	1	3
18	180	262	4000	0	1	3
21	180	512	4000	0	1	3
42	124	1000	8000	0	1	8
46	98	1000	8000	32	2	8
52	125	2000	8000	0	2	14
67	480	512	8000	32	0	0
45	480	1000	4000	0	0	0
