# Supplementary material for: A methodology for the design of experiments in computational intelligence with multiple regression models
Source: PeerJ. 2016 Dec 1;4:e2721. doi: 10.7717/peerj.2721 (PMC5136129; doi:10.7717/peerj.2721)
Supplement: Data S1 — Datailed results from UC Irvine Machine Learning Repository (Housing, Machine CPU, Wine Quality, Automobile and Parkinson) and the 3 Use Cases (Protein Corona, Gajewicz Metal Oxides and Aquatic Toxicity) [file peerj-04-2721-s001.zip › 0_datasets/ds.Parkinson.csv]

motor_UPDRS	age	sex	test_time	JitterPer	JitterAbs	Jitter_RAP	Jitter_PPQ5	Jitter_DDP	Shimmer	Shimmer_dB	Shimmer_APQ3	Shimmer_APQ5	Shimmer_APQ11	Shimmer_DDA	NHR	HNR	RPDE	DFA	PPE
28.199	72	0	5.6431	0.00662	3.38E-05	0.00401	0.00317	0.01204	0.02565	0.23	0.01438	0.01309	0.01662	0.04314	0.01429	21.64	0.41888	0.54842	0.16006
28.447	72	0	12.666	0.003	1.68E-05	0.00132	0.0015	0.00395	0.02024	0.179	0.00994	0.01072	0.01689	0.02982	0.011112	27.183	0.43493	0.56477	0.1081
28.695	72	0	19.681	0.00481	2.46E-05	0.00205	0.00208	0.00616	0.01675	0.181	0.00734	0.00844	0.01458	0.02202	0.02022	23.047	0.46222	0.54405	0.21014
28.905	72	0	25.647	0.00528	2.66E-05	0.00191	0.00264	0.00573	0.02309	0.327	0.01106	0.01265	0.01963	0.03317	0.027837	24.445	0.4873	0.57794	0.33277
29.187	72	0	33.642	0.00335	2.01E-05	0.00093	0.0013	0.00278	0.01703	0.176	0.00679	0.00929	0.01819	0.02036	0.011625	26.126	0.47188	0.56122	0.19361
29.435	72	0	40.652	0.00353	2.29E-05	0.00119	0.00159	0.00357	0.02227	0.214	0.01006	0.01337	0.02263	0.03019	0.009438	22.946	0.53949	0.57243	0.195
29.682	72	0	47.649	0.00422	2.40E-05	0.00212	0.00221	0.00637	0.04352	0.445	0.02376	0.02621	0.03488	0.07128	0.01326	22.506	0.4925	0.54779	0.17563
29.928	72	0	54.64	0.00476	2.47E-05	0.00226	0.00259	0.00678	0.02191	0.212	0.00979	0.01462	0.01911	0.02937	0.027969	22.929	0.47712	0.54234	0.23844
30.177	72	0	61.669	0.00432	2.85E-05	0.00156	0.00207	0.00468	0.04296	0.371	0.01774	0.02134	0.03451	0.05323	0.013381	22.078	0.51563	0.61864	0.20037
30.424	72	0	68.688	0.00496	2.70E-05	0.00258	0.00253	0.00773	0.0361	0.31	0.0203	0.0197	0.02569	0.06089	0.018021	22.606	0.50032	0.58673	0.20117
30.67	72	0	75.653	0.00465	2.55E-05	0.00238	0.0026	0.00715	0.02132	0.188	0.01069	0.01214	0.01844	0.03206	0.017443	25.672	0.49892	0.61068	0.17387
30.917	72	0	82.653	0.00537	3.22E-05	0.00236	0.00278	0.00709	0.02377	0.282	0.01001	0.01375	0.02395	0.03003	0.017115	24.204	0.46686	0.57984	0.1939
31.309	72	0	89.635	0.00524	3.29E-05	0.00235	0.00251	0.00704	0.02493	0.24	0.01176	0.01395	0.02019	0.03528	0.011876	22.203	0.566	0.60571	0.20984
31.776	72	0	96.633	0.00354	2.39E-05	0.00142	0.0015	0.00427	0.02107	0.171	0.00847	0.0104	0.0192	0.0254	0.015008	24.614	0.61348	0.60661	0.15881
32.243	72	0	103.64	0.0053	3.18E-05	0.00241	0.00231	0.00724	0.02791	0.291	0.0131	0.0126	0.02069	0.0393	0.018093	23.533	0.51577	0.5679	0.21461
32.71	72	0	110.65	0.00456	2.91E-05	0.00152	0.00194	0.00457	0.02878	0.264	0.01379	0.01494	0.02309	0.04138	0.020181	22.203	0.51806	0.56978	0.17508
33.178	72	0	117.66	0.00693	3.93E-05	0.00329	0.00285	0.00987	0.0281	0.274	0.01468	0.0143	0.01952	0.04405	0.04198	20.878	0.52874	0.57711	0.34948
33.643	72	0	124.64	0.00652	3.78E-05	0.00313	0.00311	0.0094	0.03011	0.32	0.01603	0.01733	0.02293	0.0481	0.031634	22.212	0.50991	0.61093	0.23048
34.109	72	0	131.64	0.00571	3.71E-05	0.00296	0.00293	0.00889	0.02522	0.223	0.0126	0.01466	0.02145	0.0378	0.031546	23.129	0.52714	0.5922	0.18211
34.646	72	0	139.69	0.00372	2.22E-05	0.00181	0.00195	0.00542	0.0323	0.288	0.01458	0.01732	0.02908	0.04373	0.010976	22.939	0.49687	0.57726	0.16567
35.043	72	0	145.64	0.00285	1.65E-05	0.00079	0.00109	0.00237	0.01524	0.133	0.00567	0.00682	0.01299	0.01702	0.004652	25.181	0.42536	0.54735	0.16946
35.509	72	0	152.64	0.00629	3.57E-05	0.00278	0.00293	0.00835	0.03791	0.338	0.01915	0.02174	0.03315	0.05745	0.043582	20.757	0.58088	0.56681	0.27924
35.976	72	0	159.64	0.00375	2.22E-05	0.00157	0.00175	0.00471	0.02477	0.244	0.0112	0.01283	0.02063	0.0336	0.014068	24.275	0.43119	0.56869	0.19339
36.977	72	0	174.66	0.00386	2.26E-05	0.00178	0.00195	0.00535	0.02842	0.295	0.01312	0.01514	0.02626	0.03936	0.015298	24.126	0.43806	0.59755	0.20164
28.199	72	0	5.6431	0.00348	1.55E-05	0.00124	0.00133	0.00372	0.01192	0.113	0.00411	0.00463	0.00949	0.01234	0.009238	27.927	0.3734	0.52499	0.17066
28.447	72	0	12.667	0.0095	5.88E-05	0.00446	0.00457	0.01337	0.03337	0.411	0.01828	0.01899	0.01999	0.05484	0.052492	20.533	0.55096	0.55348	0.26094
28.695	72	0	19.682	0.00401	2.41E-05	0.00149	0.00185	0.00446	0.01508	0.16	0.00623	0.00768	0.01039	0.01868	0.029589	26.126	0.51888	0.54699	0.2155
28.905	72	0	25.647	0.0034	2.05E-05	0.00178	0.00162	0.00533	0.01452	0.157	0.00711	0.00765	0.00926	0.02132	0.016636	25.986	0.42271	0.56963	0.11774
29.187	72	0	33.643	0.00317	1.74E-05	0.00128	0.00156	0.00385	0.01098	0.114	0.00474	0.00644	0.0092	0.01421	0.014619	26.514	0.49559	0.53565	0.18891
29.435	72	0	40.652	0.00471	2.83E-05	0.00165	0.00146	0.00496	0.0236	0.226	0.00971	0.01166	0.01774	0.02914	0.032426	25.188	0.4952	0.55286	0.22883
29.682	72	0	47.649	0.00772	3.97E-05	0.00437	0.0042	0.0131	0.05514	0.506	0.03163	0.03072	0.0386	0.0949	0.018124	20.744	0.41898	0.54621	0.21898
29.928	72	0	54.64	0.00686	3.80E-05	0.00369	0.00358	0.01107	0.02752	0.241	0.01358	0.01621	0.02313	0.04075	0.019761	21.77	0.52472	0.55433	0.23521
30.177	72	0	61.669	0.00292	1.82E-05	0.00091	0.00133	0.00273	0.01894	0.168	0.00782	0.01017	0.0194	0.02345	0.00408	26.311	0.46007	0.57198	0.15523
30.424	72	0	68.688	0.0034	1.73E-05	0.00161	0.00174	0.00482	0.03739	0.316	0.0212	0.02195	0.03069	0.0636	0.005567	25.399	0.45462	0.56983	0.16291
30.67	72	0	75.654	0.00379	2.06E-05	0.00149	0.00176	0.00446	0.02032	0.198	0.01045	0.01124	0.01614	0.03134	0.015468	25.512	0.45369	0.56939	0.17577
30.917	72	0	82.653	0.00736	3.91E-05	0.00396	0.0042	0.01187	0.02401	0.28	0.01145	0.01402	0.01875	0.03434	0.029449	21.571	0.56359	0.5566	0.27912
31.309	72	0	89.635	0.00991	5.69E-05	0.00417	0.00546	0.01251	0.04233	0.44	0.01934	0.02627	0.03872	0.05801	0.06965	18.719	0.5559	0.59191	0.39101
31.776	72	0	96.634	0.00257	1.67E-05	0.00117	0.00129	0.00352	0.02342	0.199	0.01146	0.01338	0.01927	0.03438	0.004806	27.847	0.50686	0.62221	0.14519
32.243	72	0	103.64	0.00395	2.31E-05	0.00158	0.00232	0.00473	0.01208	0.135	0.00511	0.00637	0.00879	0.01533	0.022641	28.22	0.44028	0.59017	0.24612
32.71	72	0	110.65	0.00287	1.63E-05	0.00113	0.00125	0.00338	0.01381	0.122	0.0043	0.00568	0.01144	0.0129	0.005444	27.228	0.52224	0.57095	0.17232
33.178	72	0	117.67	0.00806	4.27E-05	0.00427	0.00434	0.0128	0.05175	0.499	0.02832	0.03328	0.03906	0.08495	0.030945	20.889	0.54135	0.5913	0.23974
33.643	72	0	124.64	0.00656	3.77E-05	0.00332	0.00365	0.00995	0.03085	0.329	0.01393	0.01734	0.0257	0.0418	0.036457	23.588	0.47106	0.60709	0.24246
34.109	72	0	131.64	0.00389	2.51E-05	0.00149	0.00166	0.00448	0.02447	0.227	0.01083	0.01298	0.02097	0.03249	0.02053	24.184	0.58492	0.59993	0.20018
34.646	72	0	139.69	0.00413	2.27E-05	0.00163	0.00146	0.00489	0.01551	0.14	0.00736	0.00823	0.01273	0.02207	0.01119	24.626	0.52783	0.57067	0.16415
35.043	72	0	145.64	0.00383	2.35E-05	0.00136	0.00168	0.00408	0.01866	0.2	0.00858	0.01039	0.01611	0.02575	0.013627	26.778	0.51173	0.58429	0.16517
35.509	72	0	152.64	0.00333	1.95E-05	0.00144	0.00177	0.00431	0.02078	0.183	0.00794	0.01078	0.01966	0.02383	0.006536	24.949	0.56169	0.58895	0.19379
35.976	72	0	159.64	0.00354	1.98E-05	0.00181	0.0019	0.00542	0.01234	0.111	0.00571	0.00665	0.01032	0.01713	0.004073	26.116	0.45826	0.58323	0.15706
36.443	72	0	166.64	0.00419	2.77E-05	0.00131	0.00168	0.00392	0.02508	0.236	0.01074	0.01354	0.02499	0.03221	0.01886	24.292	0.56615	0.57068	0.18185
36.977	72	0	174.66	0.00369	2.22E-05	0.00149	0.00183	0.00446	0.02385	0.222	0.01123	0.01306	0.02232	0.0337	0.010868	25	0.49219	0.61602	0.18939
28.199	72	0	5.6438	0.00413	2.07E-05	0.00173	0.00165	0.0052	0.01282	0.125	0.00555	0.00651	0.01103	0.01665	0.03079	26.641	0.50911	0.53637	0.25183
28.447	72	0	12.667	0.00293	1.58E-05	0.001	0.00099	0.003	0.00742	0.068	0.00272	0.00365	0.00761	0.00817	0.00837	29.956	0.37935	0.53211	0.10102
28.695	72	0	19.682	0.00565	3.23E-05	0.00203	0.00197	0.00608	0.02665	0.234	0.01236	0.01605	0.02703	0.03708	0.023597	24.187	0.54496	0.54781	0.28323
28.905	72	0	25.648	0.00279	1.55E-05	0.00127	0.00138	0.0038	0.00951	0.09	0.00485	0.00516	0.00768	0.01454	0.009819	28.288	0.40623	0.56091	0.13535
29.187	72	0	33.644	0.00575	3.44E-05	0.00283	0.00333	0.00848	0.03897	0.366	0.02111	0.02268	0.02971	0.06332	0.019627	21.441	0.53941	0.54939	0.24969
29.435	72	0	40.653	0.00528	3.10E-05	0.00133	0.00137	0.00398	0.01582	0.15	0.00557	0.00761	0.0152	0.0167	0.01864	26.281	0.49819	0.5488	0.24448
29.682	72	0	47.649	0.008	4.26E-05	0.00417	0.00423	0.01252	0.01329	0.225	0.00551	0.00649	0.01069	0.01652	0.060182	25.347	0.43478	0.5514	0.26728
29.928	72	0	54.64	0.00456	2.48E-05	0.00216	0.00199	0.00649	0.0163	0.164	0.00749	0.00943	0.01378	0.02248	0.01333	25.401	0.4642	0.552	0.15571
30.177	72	0	61.669	0.0066	3.85E-05	0.00283	0.00329	0.00849	0.03276	0.413	0.01257	0.01859	0.03459	0.03771	0.035916	22.245	0.50512	0.56888	0.28586
30.424	72	0	68.688	0.00622	2.89E-05	0.00282	0.00322	0.00846	0.02978	0.315	0.01499	0.017	0.02509	0.04496	0.023728	23.339	0.45981	0.53708	0.34328
30.67	72	0	75.654	0.00423	1.95E-05	0.0022	0.00205	0.00659	0.05271	0.502	0.03072	0.02612	0.03471	0.09216	0.011134	24.815	0.4691	0.54898	0.17545
30.917	72	0	82.654	0.00318	1.68E-05	0.00138	0.00153	0.00415	0.01742	0.168	0.00811	0.00919	0.01467	0.02433	0.007442	26.108	0.46327	0.56787	0.14535
31.309	72	0	89.635	0.00423	2.30E-05	0.00159	0.0018	0.00478	0.01438	0.162	0.00623	0.00658	0.01093	0.01868	0.041199	24.186	0.48465	0.5738	0.18222
31.776	72	0	96.634	0.00302	1.83E-05	0.0015	0.00148	0.00449	0.01442	0.133	0.00676	0.0082	0.01258	0.02027	0.011776	29.131	0.50607	0.61594	0.14446
32.243	72	0	103.64	0.00199	1.23E-05	0.0009	0.00106	0.00269	0.01011	0.1	0.00408	0.00505	0.00998	0.01224	0.003882	30.133	0.43008	0.56459	0.084108
32.71	72	0	110.65	0.00271	1.57E-05	0.00101	0.00105	0.00304	0.01311	0.126	0.00407	0.00581	0.01428	0.01221	0.006327	29.989	0.40018	0.55809	0.1296
33.178	72	0	117.67	0.0054	2.83E-05	0.00251	0.00258	0.00753	0.03613	0.346	0.0192	0.02012	0.02599	0.0576	0.03257	24.971	0.48176	0.55703	0.25585
33.643	72	0	124.64	0.00332	1.85E-05	0.0017	0.00177	0.00511	0.02288	0.187	0.01174	0.01356	0.01702	0.03522	0.004654	27.017	0.44032	0.59028	0.14781
34.11	72	0	131.64	0.00292	1.53E-05	0.00125	0.00149	0.00375	0.01871	0.196	0.00901	0.01065	0.0151	0.02704	0.006201	27.213	0.46286	0.59251	0.16504
34.646	72	0	139.69	0.00213	1.34E-05	0.00081	0.00104	0.00242	0.0132	0.117	0.00559	0.00739	0.0125	0.01677	0.003158	28.968	0.56482	0.56765	0.12141
35.043	72	0	145.64	0.00441	2.75E-05	0.00176	0.00204	0.00527	0.02383	0.245	0.00943	0.0122	0.02105	0.02828	0.0262	25.364	0.58352	0.57931	0.25166
35.51	72	0	152.64	0.00412	2.43E-05	0.00216	0.00232	0.00649	0.0212	0.197	0.01091	0.01213	0.01852	0.03273	0.007897	24.567	0.44985	0.59345	0.21892
35.976	72	0	159.64	0.0048	2.83E-05	0.00183	0.00162	0.00549	0.02205	0.192	0.01038	0.01105	0.01895	0.03114	0.027838	25.665	0.46005	0.56051	0.17159
36.443	72	0	166.64	0.00573	4.07E-05	0.00194	0.00257	0.00581	0.03045	0.273	0.01363	0.01719	0.02837	0.04089	0.033954	22.478	0.5658	0.56881	0.36034
36.977	72	0	174.66	0.00508	2.70E-05	0.00228	0.00258	0.00683	0.02721	0.29	0.0139	0.01312	0.01911	0.0417	0.026755	24.348	0.53511	0.59545	0.18327
28.199	72	0	5.6451	0.00217	1.14E-05	0.00086	0.00099	0.00259	0.00798	0.072	0.00271	0.00354	0.00781	0.00812	0.004547	30.749	0.41216	0.54572	0.094704
28.447	72	0	12.669	0.00519	2.60E-05	0.00168	0.00203	0.00504	0.01623	0.198	0.00579	0.00774	0.01547	0.01736	0.032409	23.771	0.46267	0.53484	0.25813
28.695	72	0	19.684	0.00448	2.41E-05	0.00229	0.00235	0.00688	0.0244	0.245	0.0128	0.0137	0.01746	0.03841	0.023457	23.305	0.4884	0.54104	0.22774
28.905	72	0	25.649	0.00349	2.15E-05	0.00119	0.00137	0.00358	0.00872	0.083	0.00378	0.00462	0.0067	0.01133	0.027207	28.418	0.45816	0.54968	0.1155
29.187	72	0	33.645	0.00362	1.84E-05	0.00135	0.0015	0.00404	0.01519	0.14	0.00627	0.00775	0.01429	0.0188	0.009252	26.236	0.49075	0.55327	0.18026
29.435	72	0	40.654	0.00364	1.91E-05	0.00168	0.00217	0.00503	0.02178	0.206	0.00963	0.01268	0.01691	0.02889	0.015821	26.781	0.43762	0.54362	0.16291
29.682	72	0	47.651	0.00514	2.70E-05	0.00192	0.00223	0.00575	0.02012	0.206	0.00869	0.01118	0.02001	0.02607	0.017879	23.309	0.50064	0.54761	0.21011
29.929	72	0	54.642	0.00486	2.81E-05	0.00219	0.00221	0.00656	0.02107	0.196	0.00964	0.01146	0.01992	0.02892	0.01752	24.654	0.4635	0.5844	0.22165
30.177	72	0	61.671	0.00341	1.96E-05	0.00147	0.00161	0.00442	0.01863	0.174	0.00716	0.00941	0.01934	0.02148	0.006659	26.196	0.4774	0.57961	0.18535
30.424	72	0	68.69	0.00514	2.82E-05	0.00251	0.00269	0.00753	0.03492	0.336	0.01731	0.02023	0.03273	0.05192	0.02906	24.327	0.48392	0.56152	0.22322
30.67	72	0	75.656	0.00719	4.78E-05	0.00297	0.0031	0.00891	0.042	0.418	0.02177	0.02512	0.03211	0.0653	0.054472	17.955	0.57074	0.56186	0.27159
30.917	72	0	82.656	0.00244	1.57E-05	0.0009	0.00124	0.0027	0.01735	0.155	0.0086	0.01029	0.01568	0.02581	0.006082	27.469	0.50481	0.56255	0.15928
31.309	72	0	89.637	0.00403	2.15E-05	0.00188	0.00196	0.00565	0.02217	0.184	0.01125	0.01263	0.02001	0.03376	0.007937	25.007	0.49779	0.58173	0.21169
31.776	72	0	96.636	0.00317	1.84E-05	0.00138	0.00185	0.00415	0.02006	0.19	0.00911	0.0114	0.01844	0.02734	0.010202	27.417	0.46469	0.56862	0.16109
32.243	72	0	103.64	0.00361	2.25E-05	0.00155	0.00174	0.00464	0.03128	0.296	0.01573	0.01891	0.028	0.04718	0.011292	25.671	0.58647	0.57157	0.16373
32.71	72	0	110.65	0.00339	1.87E-05	0.00109	0.00122	0.00326	0.01087	0.101	0.00432	0.00571	0.01072	0.01296	0.016372	25.82	0.52115	0.57265	0.19374
33.178	72	0	117.67	0.00505	2.70E-05	0.00232	0.00247	0.00696	0.03011	0.271	0.01477	0.01539	0.02187	0.04432	0.019899	24.02	0.52117	0.58002	0.21323
33.643	72	0	124.65	0.00264	1.57E-05	0.00109	0.00126	0.00327	0.01622	0.141	0.00759	0.0102	0.01431	0.02278	0.003275	27.273	0.43491	0.5939	0.13611
34.11	72	0	131.64	0.00452	2.55E-05	0.00218	0.00256	0.00654	0.02099	0.245	0.0083	0.01062	0.02102	0.02489	0.01969	25.343	0.47581	0.57381	0.25523
34.646	72	0	139.69	0.00282	1.49E-05	0.00136	0.0015	0.00409	0.01462	0.121	0.00737	0.00806	0.01163	0.02211	0.00395	26.909	0.48639	0.5598	0.14241
35.043	72	0	145.64	0.00305	1.78E-05	0.00123	0.00156	0.00369	0.0138	0.124	0.00624	0.0079	0.01432	0.01873	0.00526	26.564	0.45884	0.56794	0.18838
35.51	72	0	152.64	0.00493	2.74E-05	0.00196	0.00237	0.00588	0.01735	0.183	0.00843	0.01012	0.01403	0.02528	0.023882	24.519	0.5151	0.54723	0.21213
35.976	72	0	159.64	0.00296	1.83E-05	0.00086	0.0012	0.00259	0.02135	0.197	0.00889	0.01143	0.01986	0.02668	0.00571	25.696	0.52484	0.57219	0.15257
36.443	72	0	166.64	0.00285	1.62E-05	0.00113	0.00141	0.00339	0.01432	0.134	0.00764	0.0085	0.01222	0.02291	0.004805	26.264	0.42922	0.54986	0.15523
36.978	72	0	174.66	0.00547	2.35E-05	0.00234	0.00268	0.00701	0.01991	0.267	0.00912	0.00969	0.01333	0.02735	0.017361	24.543	0.52026	0.53879	0.29135
28.199	72	0	5.6458	0.00294	1.46E-05	0.00121	0.00125	0.00362	0.01058	0.098	0.00459	0.00495	0.00888	0.01377	0.014919	27.53	0.40986	0.53572	0.16635
28.447	72	0	12.669	0.00683	3.18E-05	0.00321	0.00264	0.00963	0.02444	0.266	0.0123	0.01301	0.01608	0.03691	0.032306	26.011	0.34869	0.52958	0.2216
28.695	72	0	19.684	0.00476	2.31E-05	0.002	0.00256	0.00601	0.01252	0.168	0.00383	0.00511	0.01148	0.0115	0.04158	27.728	0.42588	0.52132	0.24907
28.905	72	0	25.649	0.00383	1.82E-05	0.0013	0.00102	0.0039	0.00856	0.083	0.0036	0.00417	0.00695	0.01079	0.010014	30.624	0.43668	0.52792	0.22035
29.188	72	0	33.646	0.00396	2.11E-05	0.00161	0.0017	0.00483	0.01655	0.202	0.00777	0.0086	0.01407	0.0233	0.021962	24.817	0.40874	0.5376	0.23853
29.435	72	0	40.655	0.00335	1.73E-05	0.00151	0.00159	0.00454	0.01924	0.175	0.00977	0.01083	0.01701	0.02931	0.005492	25.086	0.42962	0.54587	0.17409
29.682	72	0	47.651	0.00677	3.31E-05	0.00333	0.00339	0.00999	0.02154	0.225	0.00996	0.01062	0.01323	0.02987	0.061012	21.673	0.50328	0.53283	0.35767
29.929	72	0	54.642	0.00504	2.43E-05	0.00275	0.00208	0.00824	0.01665	0.156	0.00988	0.00824	0.01097	0.02965	0.012969	25.179	0.39947	0.53794	0.17972
30.177	72	0	61.672	0.00515	2.61E-05	0.00255	0.00253	0.00764	0.02258	0.224	0.0114	0.01088	0.0163	0.03421	0.022155	24.226	0.40356	0.53549	0.17602
30.424	72	0	68.69	0.00368	1.74E-05	0.00175	0.00191	0.00526	0.00903	0.103	0.00304	0.00379	0.00765	0.00911	0.023404	29.502	0.38351	0.53117	0.272
30.67	72	0	75.656	0.00708	3.36E-05	0.00421	0.00359	0.01263	0.06087	0.556	0.03461	0.03423	0.04843	0.10382	0.022042	20.164	0.46492	0.54246	0.21852
30.917	72	0	82.656	0.00271	1.55E-05	0.00084	0.0009	0.00251	0.01025	0.094	0.00353	0.00449	0.00963	0.01058	0.015737	29.042	0.40159	0.53152	0.2305
31.309	72	0	89.637	0.0029	1.44E-05	0.00124	0.00142	0.00371	0.01911	0.173	0.00862	0.01156	0.01737	0.02585	0.00532	27.2	0.44967	0.547	0.18939
31.776	72	0	96.637	0.00396	1.98E-05	0.00183	0.00208	0.00549	0.01278	0.123	0.00478	0.00625	0.01139	0.01434	0.020975	27.044	0.42665	0.53526	0.14895
32.243	72	0	103.64	0.00287	1.49E-05	0.00119	0.00119	0.00358	0.0118	0.109	0.00503	0.00618	0.01136	0.01509	0.010718	27.279	0.46167	0.5574	0.13379
32.71	72	0	110.65	0.0026	1.23E-05	0.00112	0.00116	0.00335	0.00986	0.1	0.00386	0.00485	0.0099	0.01158	0.007925	29.139	0.45818	0.53979	0.14151
33.178	72	0	117.67	0.00444	2.37E-05	0.00197	0.00224	0.00591	0.01878	0.176	0.00988	0.01072	0.01436	0.02965	0.039547	26.738	0.39302	0.54446	0.18345
33.643	72	0	124.65	0.00282	1.51E-05	0.00114	0.00141	0.00341	0.02343	0.235	0.01151	0.01383	0.01833	0.03452	0.005994	25.884	0.46851	0.54236	0.15182
34.11	72	0	131.65	0.0044	2.21E-05	0.00254	0.00249	0.00761	0.01994	0.209	0.01024	0.01043	0.01448	0.03071	0.012529	25.276	0.4264	0.55311	0.13939
34.646	72	0	139.69	0.00512	2.44E-05	0.00217	0.00201	0.0065	0.02483	0.286	0.0134	0.01262	0.01804	0.0402	0.021681	23.154	0.45981	0.52818	0.19469
35.043	72	0	145.64	0.00362	1.98E-05	0.0017	0.00179	0.0051	0.02059	0.214	0.00982	0.01136	0.01651	0.02946	0.009306	25.405	0.50326	0.55273	0.1667
35.51	72	0	152.65	0.00462	2.36E-05	0.00175	0.00166	0.00524	0.02311	0.253	0.01048	0.01092	0.01919	0.03144	0.024114	23.647	0.47271	0.53733	0.29576
35.976	72	0	159.64	0.0044	2.36E-05	0.00203	0.00218	0.00609	0.03425	0.328	0.01819	0.01712	0.02475	0.05458	0.027221	23.779	0.42994	0.5626	0.21601
36.443	72	0	166.64	0.00242	1.24E-05	0.00077	0.001	0.0023	0.01238	0.114	0.00524	0.00523	0.00969	0.01573	0.005846	27.646	0.4307	0.5421	0.1702
36.978	72	0	174.66	0.00567	2.40E-05	0.00295	0.00254	0.00885	0.0256	0.268	0.01469	0.01323	0.01801	0.04407	0.027539	25.451	0.44728	0.52472	0.22185
28.199	72	0	5.6458	0.0025	1.28E-05	0.0011	0.0009	0.00331	0.00631	0.058	0.00222	0.00259	0.00579	0.00665	0.003822	32.102	0.31053	0.52767	0.065937
28.447	72	0	12.669	0.00311	1.59E-05	0.00111	0.00139	0.00334	0.0075	0.073	0.00321	0.00401	0.00717	0.00964	0.013829	27.944	0.48257	0.52114	0.19458
28.695	72	0	19.685	0.00273	1.41E-05	0.00074	0.00096	0.00221	0.0083	0.096	0.00221	0.00293	0.00681	0.00664	0.011119	30.662	0.34397	0.52334	0.067913
28.905	72	0	25.65	0.00178	8.70E-06	0.00083	0.00098	0.00248	0.00655	0.057	0.00295	0.00359	0.00638	0.00884	0.001167	31.128	0.32385	0.532	0.11675
29.188	72	0	33.646	0.00268	1.24E-05	0.00097	0.00118	0.0029	0.01189	0.154	0.00543	0.00603	0.01014	0.01629	0.011461	28.213	0.35838	0.52532	0.25504
29.435	72	0	40.655	0.00253	1.18E-05	0.00091	0.00113	0.00273	0.00955	0.096	0.00406	0.00473	0.00804	0.01219	0.003878	27.661	0.35628	0.52571	0.15459
29.682	72	0	47.652	0.00306	1.37E-05	0.00118	0.00127	0.00354	0.00946	0.093	0.00356	0.0045	0.00856	0.01067	0.006325	28.557	0.3955	0.52092	0.16758
29.929	72	0	54.642	0.00393	1.86E-05	0.00132	0.00157	0.00396	0.01519	0.152	0.00641	0.00771	0.01461	0.01922	0.010019	26.377	0.49156	0.52678	0.23674
30.177	72	0	61.672	0.00341	1.75E-05	0.00131	0.00143	0.00394	0.00932	0.091	0.00334	0.00436	0.01096	0.01003	0.010444	27.419	0.34296	0.52515	0.18691
30.424	72	0	68.691	0.00742	3.84E-05	0.00339	0.00271	0.01016	0.0342	0.307	0.01791	0.01955	0.02662	0.05372	0.042124	23.482	0.46493	0.53856	0.27943
30.67	72	0	75.657	0.00285	1.34E-05	0.00109	0.00136	0.00327	0.00979	0.089	0.00456	0.00584	0.00937	0.01367	0.004981	27.984	0.35842	0.5235	0.17555
30.917	72	0	82.656	0.00411	2.21E-05	0.00172	0.00171	0.00517	0.01536	0.147	0.00711	0.00801	0.01387	0.02134	0.010141	28.04	0.43395	0.5303	0.17866
31.309	72	0	89.638	0.0019	9.49E-06	0.00084	0.00086	0.00251	0.00948	0.082	0.00409	0.00444	0.0075	0.01227	0.002273	30.701	0.42609	0.54059	0.089143
31.776	72	0	96.637	0.00488	2.57E-05	0.00265	0.00251	0.00794	0.04983	0.448	0.02688	0.02876	0.04052	0.08064	0.013138	23.136	0.46322	0.57274	0.19423
32.243	72	0	103.64	0.00449	2.59E-05	0.00213	0.00199	0.0064	0.01399	0.177	0.0065	0.00706	0.00809	0.01951	0.03434	26.027	0.51021	0.53674	0.21637
32.71	72	0	110.66	0.00388	2.25E-05	0.00156	0.00187	0.00467	0.02992	0.269	0.01529	0.01899	0.02505	0.04587	0.010611	22.423	0.43088	0.5456	0.20759
33.178	72	0	117.67	0.00428	2.12E-05	0.00193	0.00213	0.0058	0.01	0.113	0.00421	0.0047	0.00787	0.01262	0.033771	26.933	0.51212	0.52915	0.21528
33.643	72	0	124.65	0.0037	1.84E-05	0.0019	0.00185	0.00571	0.0126	0.119	0.00613	0.00617	0.01109	0.01838	0.008281	27.397	0.38173	0.53578	0.16542
34.11	72	0	131.65	0.00688	4.08E-05	0.0039	0.00307	0.01171	0.04896	0.419	0.03117	0.02345	0.03018	0.09352	0.011702	20.937	0.49023	0.55236	0.14037
34.646	72	0	139.69	0.00399	1.88E-05	0.0018	0.002	0.00541	0.01808	0.208	0.0092	0.00856	0.01322	0.0276	0.020915	25.823	0.47471	0.52772	0.18476
35.043	72	0	145.64	0.00219	1.23E-05	0.00104	0.00104	0.00311	0.0096	0.084	0.00471	0.00499	0.00733	0.01412	0.002408	28.183	0.40955	0.54892	0.10926
35.51	72	0	152.65	0.00378	1.96E-05	0.00176	0.00209	0.00527	0.02038	0.232	0.01056	0.01152	0.01346	0.03169	0.013739	25.078	0.41783	0.53659	0.17886
35.976	72	0	159.64	0.00237	1.24E-05	0.00085	0.00087	0.00256	0.01177	0.131	0.00465	0.00552	0.0107	0.01396	0.015931	28.224	0.40007	0.52887	0.13589
36.443	72	0	166.64	0.00224	1.17E-05	0.00092	0.00082	0.00276	0.00922	0.081	0.00471	0.00466	0.00735	0.01413	0.00804	29.25	0.40794	0.54068	0.1037
36.978	72	0	174.66	0.00526	2.57E-05	0.00225	0.00177	0.00675	0.03183	0.304	0.01906	0.01497	0.02093	0.05718	0.033822	25.852	0.45109	0.54152	0.23613
11.078	58	0	3.866	0.006	4.82E-05	0.00302	0.00294	0.00907	0.03866	0.331	0.02058	0.02464	0.02778	0.06175	0.019901	20.632	0.541	0.75905	0.19288
11.218	58	0	10.815	0.0081	6.38E-05	0.00418	0.00457	0.01253	0.04927	0.405	0.02715	0.02974	0.03218	0.08144	0.026285	18.254	0.48799	0.76679	0.22277
11.359	58	0	17.772	0.00804	6.19E-05	0.00385	0.00435	0.01155	0.03678	0.324	0.02037	0.02216	0.02621	0.06111	0.024588	18.844	0.49372	0.78209	0.29585
11.501	58	0	24.808	0.0068	4.94E-05	0.0035	0.00319	0.0105	0.05083	0.481	0.02733	0.03268	0.03511	0.08198	0.034226	18.272	0.54635	0.73637	0.2157
11.643	58	0	31.815	0.00375	2.84E-05	0.00201	0.00209	0.00603	0.03091	0.269	0.01684	0.01845	0.02269	0.05052	0.011958	20.456	0.44009	0.73302	0.18964
11.782	58	0	38.713	0.00685	4.97E-05	0.00302	0.00399	0.00907	0.03645	0.327	0.01847	0.02205	0.02954	0.05542	0.036966	19.645	0.57472	0.73373	0.25354
11.925	58	0	45.8	0.00859	6.60E-05	0.00444	0.00511	0.01333	0.04734	0.414	0.02472	0.02815	0.03315	0.07417	0.03479	17.162	0.62855	0.74011	0.3312
12.106	58	0	54.767	0.00402	3.11E-05	0.00208	0.00237	0.00624	0.05526	0.481	0.03011	0.03574	0.04501	0.09033	0.013458	19.732	0.49181	0.70492	0.1982
12.208	58	0	59.8	0.00783	5.49E-05	0.00448	0.00398	0.01343	0.08527	0.775	0.04965	0.05207	0.05804	0.14894	0.030341	16.972	0.6046	0.71757	0.26869
12.388	58	0	68.728	0.00687	5.55E-05	0.0034	0.00345	0.0102	0.04239	0.36	0.02444	0.0246	0.03121	0.07333	0.036049	15.775	0.61152	0.74542	0.26677
12.491	58	0	73.803	0.00583	4.58E-05	0.00259	0.00294	0.00778	0.04284	0.425	0.0226	0.02375	0.02955	0.0678	0.027825	17.964	0.61223	0.74484	0.24689
12.631	58	0	80.749	0.01131	8.83E-05	0.00587	0.00631	0.0176	0.05021	0.457	0.02745	0.03295	0.04136	0.08235	0.064268	14.303	0.62784	0.77285	0.31284
12.834	58	0	90.799	0.01114	8.42E-05	0.0059	0.00607	0.01771	0.05202	0.484	0.02985	0.03131	0.03707	0.08956	0.046455	16.475	0.60424	0.77617	0.42277
12.915	58	0	94.774	0.0073	6.37E-05	0.00332	0.00408	0.00997	0.05484	0.482	0.02898	0.03198	0.03613	0.08694	0.029323	18.719	0.59246	0.76751	0.23456
13.026	58	0	99.36	0.00893	6.76E-05	0.00471	0.00501	0.01413	0.05941	0.545	0.03359	0.03665	0.04019	0.10078	0.045048	15.78	0.6296	0.79736	0.2978
13.854	58	0	110.71	0.00935	6.96E-05	0.00459	0.00477	0.01377	0.05592	0.514	0.02855	0.0351	0.04546	0.08564	0.025561	19.2	0.56947	0.80877	0.34737
14.225	58	0	115.8	0.01042	8.51E-05	0.00483	0.00565	0.01448	0.0545	0.469	0.02805	0.0302	0.03491	0.08416	0.049151	15.89	0.597	0.7824	0.31146
14.736	58	0	122.81	0.00578	4.25E-05	0.00328	0.00355	0.00983	0.02456	0.207	0.01275	0.01556	0.01968	0.03826	0.022762	23.306	0.55204	0.70195	0.15044
15.756	58	0	136.8	0.00533	4.44E-05	0.00288	0.00302	0.00863	0.05047	0.43	0.02736	0.03338	0.03537	0.08208	0.015608	18.908	0.50883	0.78236	0.21078
16.269	58	0	143.83	0.0082	6.58E-05	0.00432	0.00483	0.01297	0.03748	0.302	0.02022	0.02212	0.03105	0.06065	0.032287	19.055	0.54897	0.79308	0.28462
16.777	58	0	150.8	0.00793	6.39E-05	0.00379	0.00385	0.01136	0.03751	0.316	0.02074	0.02222	0.02576	0.06223	0.023637	20.85	0.47874	0.76801	0.26217
17.288	58	0	157.8	0.01597	0.00010297	0.00748	0.00744	0.02244	0.05761	0.66	0.03182	0.03597	0.04689	0.09547	0.099352	16.826	0.66523	0.78079	0.4037
17.941	58	0	166.76	0.00855	6.38E-05	0.00419	0.00418	0.01258	0.07617	0.694	0.04109	0.0485	0.05829	0.12328	0.033266	18.485	0.56922	0.7205	0.33213
18.308	58	0	171.8	0.00702	5.89E-05	0.00304	0.00357	0.00912	0.03914	0.386	0.01994	0.02468	0.02534	0.05982	0.02849	18.904	0.56422	0.76724	0.23082
18.819	58	0	178.8	0.0044	3.32E-05	0.0023	0.00282	0.00689	0.05036	0.437	0.02352	0.03349	0.03659	0.07056	0.01477	21.598	0.52999	0.74918	0.21367
11.078	58	0	3.866	0.00606	4.74E-05	0.00279	0.00311	0.00837	0.03426	0.317	0.01812	0.02032	0.02431	0.05436	0.020393	22.218	0.55257	0.76217	0.32625
11.218	58	0	10.815	0.00421	3.27E-05	0.00241	0.00244	0.00724	0.04117	0.357	0.02271	0.0275	0.03185	0.06813	0.01144	20.053	0.42051	0.77232	0.18127
11.359	58	0	17.772	0.00625	4.69E-05	0.0027	0.00301	0.0081	0.03882	0.348	0.02046	0.02352	0.0313	0.06139	0.020546	20.61	0.47052	0.77459	0.18772
11.501	58	0	24.808	0.00664	5.09E-05	0.00325	0.00394	0.00975	0.03889	0.361	0.02004	0.02342	0.03393	0.06011	0.027839	18.668	0.51236	0.76017	0.35
11.643	58	0	31.815	0.00345	2.53E-05	0.0019	0.00213	0.00571	0.02972	0.26	0.01643	0.01766	0.02115	0.04928	0.00872	21.842	0.45127	0.72039	0.17284
11.782	58	0	38.713	0.00764	5.49E-05	0.00388	0.00344	0.01165	0.02505	0.242	0.0137	0.01438	0.01858	0.04111	0.047338	22.139	0.53734	0.75183	0.24117
11.925	58	0	45.8	0.00861	6.36E-05	0.00441	0.00435	0.01323	0.03133	0.304	0.01649	0.01693	0.02403	0.04946	0.038267	18.463	0.56412	0.77711	0.26998
12.106	58	0	54.767	0.00372	2.83E-05	0.0021	0.00221	0.00629	0.03931	0.337	0.02174	0.02404	0.02601	0.06523	0.012082	20.855	0.4727	0.72572	0.16207
12.208	58	0	59.801	0.00402	2.94E-05	0.00235	0.00234	0.00705	0.03418	0.3	0.01935	0.02106	0.02255	0.05805	0.010263	20.696	0.4368	0.73441	0.1495
12.388	58	0	68.728	0.00597	4.71E-05	0.00311	0.00324	0.00934	0.05341	0.463	0.03072	0.03058	0.0354	0.09216	0.029945	15.754	0.56476	0.72098	0.2345
12.491	58	0	73.803	0.00388	3.12E-05	0.00196	0.00232	0.00589	0.04054	0.343	0.02174	0.02559	0.0311	0.06521	0.010405	21.263	0.44342	0.74866	0.19196
12.834	58	0	90.799	0.00784	6.23E-05	0.00469	0.00385	0.01406	0.03623	0.313	0.02052	0.02032	0.02587	0.06157	0.030888	17.044	0.58746	0.77879	0.19008
12.915	58	0	94.775	0.00672	5.76E-05	0.00314	0.00362	0.00943	0.054	0.455	0.02895	0.03383	0.04179	0.08686	0.019418	17.9	0.55877	0.78886	0.27465
13.026	58	0	99.361	0.00651	5.21E-05	0.00346	0.00292	0.01037	0.02938	0.257	0.01671	0.01708	0.02002	0.05012	0.017311	20.186	0.5163	0.76213	0.17525
13.854	58	0	110.71	0.0106	7.75E-05	0.00574	0.0058	0.01722	0.06052	0.574	0.03237	0.03786	0.04163	0.0971	0.035232	16.648	0.59644	0.77319	0.28204
14.225	58	0	115.8	0.01026	8.18E-05	0.00565	0.00565	0.01695	0.04916	0.47	0.02847	0.02859	0.03192	0.08542	0.040806	17.706	0.53097	0.77486	0.23395
14.736	58	0	122.81	0.00447	3.30E-05	0.00258	0.00254	0.00773	0.03437	0.298	0.01844	0.02186	0.02744	0.05533	0.010687	20.754	0.49185	0.73628	0.18522
15.756	58	0	136.8	0.01295	0.00010582	0.00755	0.00672	0.02266	0.09156	0.826	0.05059	0.05877	0.06799	0.15176	0.057731	15.827	0.56114	0.81133	0.29717
16.269	58	0	143.83	0.00881	6.85E-05	0.00435	0.00447	0.01304	0.03817	0.331	0.02063	0.02163	0.02514	0.0619	0.027068	19.358	0.61547	0.80177	0.23984
16.777	58	0	150.8	0.00595	4.63E-05	0.00237	0.00281	0.00711	0.02743	0.248	0.01509	0.01549	0.01922	0.04527	0.011165	23.474	0.47293	0.76518	0.22796
17.288	58	0	157.8	0.00777	6.03E-05	0.00325	0.00379	0.00976	0.0282	0.324	0.01393	0.01569	0.0233	0.04179	0.011007	23.032	0.4959	0.80344	0.19466
17.941	58	0	166.76	0.007	5.00E-05	0.00309	0.0029	0.00926	0.04807	0.616	0.02582	0.02921	0.03823	0.07747	0.06765	21.257	0.54206	0.73044	0.32633
18.309	58	0	171.8	0.00777	6.36E-05	0.00381	0.0046	0.01142	0.03591	0.317	0.01982	0.02008	0.02259	0.05945	0.032229	19.669	0.50186	0.79112	0.22276
18.819	58	0	178.8	0.00437	3.29E-05	0.00188	0.00224	0.00565	0.02183	0.195	0.01112	0.01269	0.01752	0.03335	0.008146	25.919	0.44509	0.75375	0.18151
11.078	58	0	3.866	0.00725	5.52E-05	0.0034	0.0033	0.01019	0.03445	0.318	0.01908	0.02029	0.02445	0.05723	0.036085	20.883	0.50137	0.75108	0.24236
11.218	58	0	10.815	0.0097	6.63E-05	0.0051	0.0049	0.0153	0.05133	0.568	0.02949	0.03156	0.03813	0.08846	0.039924	18.384	0.49252	0.75548	0.23707
11.359	58	0	17.773	0.00459	3.35E-05	0.00215	0.00241	0.00644	0.02608	0.223	0.01358	0.01605	0.0195	0.04074	0.013933	21.3	0.51754	0.7586	0.15735
11.501	58	0	24.808	0.00679	4.98E-05	0.00294	0.00381	0.00883	0.04107	0.386	0.02297	0.02561	0.02956	0.0689	0.021345	19.424	0.49711	0.73667	0.20408
11.643	58	0	31.815	0.00536	4.02E-05	0.00252	0.00228	0.00756	0.05822	0.51	0.03342	0.03643	0.0374	0.10025	0.02422	19.656	0.51326	0.71393	0.19187
11.782	58	0	38.713	0.00772	5.52E-05	0.00382	0.00423	0.01147	0.04698	0.487	0.02471	0.03019	0.03601	0.07413	0.036837	19.725	0.5201	0.75357	0.33372
11.925	58	0	45.801	0.00475	3.62E-05	0.00264	0.00253	0.00791	0.03046	0.263	0.01729	0.01628	0.02124	0.05186	0.013344	19.993	0.48648	0.75151	0.19015
12.106	58	0	54.767	0.00729	5.51E-05	0.00408	0.00384	0.01225	0.04092	0.35	0.02221	0.02318	0.02509	0.06662	0.028974	19.561	0.50753	0.72353	0.18067
12.208	58	0	59.801	0.00433	3.13E-05	0.00245	0.00246	0.00734	0.03951	0.349	0.02148	0.02451	0.0291	0.06443	0.01223	20.14	0.48378	0.7032	0.17508
12.388	58	0	68.728	0.00612	4.83E-05	0.00317	0.00373	0.0095	0.04859	0.427	0.02667	0.02844	0.03985	0.08001	0.027895	16.248	0.5969	0.75078	0.27805
12.491	58	0	73.803	0.0037	2.99E-05	0.00183	0.00226	0.0055	0.03566	0.312	0.02028	0.02199	0.02517	0.06085	0.013948	19.435	0.431	0.76318	0.19252
12.631	58	0	80.75	0.00813	6.36E-05	0.00401	0.00475	0.01204	0.0778	0.72	0.04413	0.04647	0.05383	0.13239	0.031329	17.905	0.51056	0.74622	0.24061
12.834	58	0	90.799	0.00843	6.57E-05	0.00417	0.00524	0.01251	0.04897	0.419	0.0274	0.02833	0.03384	0.0822	0.041164	15.387	0.62685	0.76622	0.32945
12.915	58	0	94.775	0.00626	5.26E-05	0.00362	0.00333	0.01086	0.04079	0.347	0.0228	0.02227	0.0251	0.0684	0.020758	19.16	0.53535	0.79953	0.21591
13.026	58	0	99.361	0.00778	6.16E-05	0.00402	0.00441	0.01205	0.03675	0.364	0.01849	0.02156	0.02656	0.05548	0.029952	19.981	0.52927	0.76155	0.22724
13.854	58	0	110.71	0.00551	4.34E-05	0.00308	0.00329	0.00924	0.04154	0.363	0.02394	0.02607	0.02911	0.07182	0.018968	17.621	0.49837	0.77292	0.22595
14.225	58	0	115.8	0.00571	4.65E-05	0.003	0.00281	0.00901	0.04128	0.357	0.0223	0.02529	0.03071	0.06689	0.013176	20.211	0.46255	0.80333	0.20339
14.736	58	0	122.81	0.00498	3.65E-05	0.00242	0.00261	0.00726	0.02605	0.248	0.01245	0.01581	0.02099	0.03736	0.009903	23.609	0.53478	0.73807	0.18433
15.756	58	0	136.8	0.00814	6.37E-05	0.00371	0.00399	0.01112	0.05068	0.464	0.02606	0.03328	0.03967	0.07819	0.027636	19.505	0.4863	0.80004	0.2594
16.269	58	0	143.83	0.00955	7.39E-05	0.00467	0.00513	0.014	0.05727	0.505	0.03194	0.03464	0.04658	0.09581	0.021009	18.431	0.57423	0.80335	0.32539
16.777	58	0	150.8	0.00558	4.18E-05	0.00209	0.00247	0.00628	0.02296	0.245	0.01121	0.01334	0.01747	0.03364	0.00736	25.646	0.41879	0.76604	0.20533
17.288	58	0	157.8	0.00631	4.60E-05	0.00325	0.00339	0.00976	0.03957	0.38	0.02316	0.02275	0.02527	0.06947	0.013434	21.427	0.50273	0.789	0.20509
17.941	58	0	166.76	0.00621	4.50E-05	0.003	0.00335	0.009	0.04671	0.454	0.02602	0.0302	0.0354	0.07806	0.020905	20.639	0.47387	0.70712	0.17682
18.309	58	0	171.8	0.0048	3.96E-05	0.00245	0.00283	0.00736	0.03055	0.263	0.01632	0.01832	0.02453	0.04897	0.010401	21.024	0.46069	0.76965	0.22459
18.819	58	0	178.8	0.00317	2.30E-05	0.00174	0.00187	0.00522	0.01818	0.159	0.00939	0.01054	0.01387	0.02818	0.003074	26.773	0.39745	0.72234	0.1386
11.078	58	0	3.8674	0.00655	5.08E-05	0.00328	0.00369	0.00985	0.04143	0.4	0.02306	0.02746	0.03212	0.06918	0.017839	19.458	0.53044	0.77356	0.25561
11.219	58	0	10.817	0.0055	4.27E-05	0.00277	0.00278	0.0083	0.04787	0.445	0.02599	0.0301	0.03177	0.07796	0.022538	19.988	0.50646	0.76236	0.19758
11.359	58	0	17.774	0.00774	5.75E-05	0.0037	0.00421	0.01111	0.04125	0.375	0.02318	0.02472	0.02894	0.06953	0.033092	17.983	0.50284	0.78155	0.2126
11.501	58	0	24.81	0.00489	3.68E-05	0.0027	0.00283	0.00809	0.03693	0.316	0.02061	0.02282	0.02584	0.06184	0.012009	20.405	0.46406	0.709	0.20891
11.643	58	0	31.817	0.00514	3.60E-05	0.00253	0.00259	0.0076	0.04127	0.37	0.01977	0.0248	0.03883	0.05931	0.017299	24.044	0.51149	0.70524	0.16022
11.782	58	0	38.715	0.00395	2.99E-05	0.00209	0.00223	0.00626	0.02993	0.257	0.01652	0.01748	0.02198	0.04956	0.010205	20.66	0.44549	0.73798	0.17684
11.925	58	0	45.802	0.00785	6.19E-05	0.00412	0.00373	0.01237	0.04469	0.372	0.0264	0.02414	0.02873	0.0792	0.042676	16.915	0.57833	0.76814	0.23239
12.106	58	0	54.769	0.0071	5.46E-05	0.00399	0.00337	0.01198	0.05402	0.476	0.02821	0.03405	0.04162	0.08462	0.037326	19.543	0.5059	0.72359	0.18886
12.208	58	0	59.802	0.00368	2.59E-05	0.00188	0.00202	0.00564	0.0353	0.315	0.01777	0.02134	0.03045	0.0533	0.032028	23.894	0.5813	0.68678	0.19596
12.388	58	0	68.729	0.01033	8.48E-05	0.00593	0.00582	0.01779	0.06918	0.587	0.04132	0.04137	0.05282	0.12395	0.058886	12.998	0.69227	0.7656	0.31257
12.491	58	0	73.805	0.00631	5.05E-05	0.00284	0.00343	0.00852	0.03811	0.326	0.02203	0.02373	0.02607	0.0661	0.037912	18.094	0.49512	0.75141	0.21799
12.631	58	0	80.751	0.00745	5.83E-05	0.00353	0.00384	0.0106	0.03776	0.414	0.02007	0.02164	0.02883	0.06022	0.0243	18.761	0.55014	0.77786	0.23763
12.834	58	0	90.801	0.00524	4.05E-05	0.00276	0.00296	0.00828	0.04173	0.351	0.02406	0.02581	0.03068	0.07217	0.022466	17.017	0.54534	0.76224	0.20882
12.915	58	0	94.776	0.0079	6.00E-05	0.00372	0.00395	0.01115	0.0423	0.404	0.02461	0.02381	0.02636	0.07384	0.031218	18.993	0.50323	0.77054	0.22728
13.026	58	0	99.363	0.00848	6.88E-05	0.00474	0.00578	0.01423	0.03463	0.3	0.01891	0.02131	0.02533	0.05672	0.035136	18.609	0.48466	0.78318	0.21701
13.854	58	0	110.71	0.00869	5.67E-05	0.0034	0.0044	0.0102	0.04077	0.437	0.0149	0.01943	0.03529	0.04471	0.025084	21.414	0.56877	0.75157	0.33849
14.225	58	0	115.8	0.00506	4.20E-05	0.00256	0.00278	0.00768	0.0378	0.319	0.01897	0.02496	0.02873	0.05691	0.014771	19.045	0.51385	0.77867	0.22452
14.736	58	0	122.81	0.00909	6.76E-05	0.00483	0.00536	0.01448	0.03607	0.333	0.0201	0.02394	0.02705	0.0603	0.035066	19.885	0.52772	0.74599	0.25965
15.756	58	0	136.8	0.00609	4.98E-05	0.00275	0.00333	0.00826	0.04401	0.393	0.02328	0.02872	0.03067	0.06983	0.013238	22.18	0.44779	0.80352	0.21366
16.269	58	0	143.83	0.00778	6.50E-05	0.00364	0.00411	0.01093	0.04958	0.416	0.02537	0.02946	0.03793	0.0761	0.032171	17.23	0.67091	0.76848	0.25243
16.777	58	0	150.8	0.00414	3.07E-05	0.00208	0.00255	0.00625	0.01945	0.183	0.00912	0.01055	0.01696	0.02736	0.006	25.472	0.50292	0.73296	0.18842
17.288	58	0	157.8	0.01286	9.99E-05	0.00731	0.00607	0.02194	0.08285	0.712	0.05051	0.04199	0.05319	0.15153	0.024576	18.473	0.56556	0.78881	0.3129
17.941	58	0	166.76	0.00499	3.70E-05	0.00251	0.00274	0.00752	0.03959	0.374	0.021	0.02521	0.03073	0.063	0.011292	22.994	0.48795	0.72952	0.16402
18.309	58	0	171.8	0.00755	6.18E-05	0.00388	0.00371	0.01163	0.03417	0.298	0.01892	0.02087	0.02718	0.05675	0.034999	18.917	0.5217	0.76307	0.2714
18.819	58	0	178.8	0.00417	3.09E-05	0.00235	0.00232	0.00706	0.02632	0.229	0.01469	0.0156	0.01863	0.04406	0.006204	23.445	0.46536	0.74583	0.14607
11.078	58	0	3.8681	0.00517	3.91E-05	0.00286	0.00285	0.00857	0.0379	0.336	0.02109	0.02294	0.02459	0.06326	0.016876	22.123	0.46611	0.77157	0.18906
11.219	58	0	10.817	0.00581	4.39E-05	0.00284	0.00297	0.00851	0.03671	0.312	0.0206	0.02377	0.02827	0.06179	0.018387	20.801	0.52149	0.73868	0.17636
11.359	58	0	17.774	0.00712	5.21E-05	0.00399	0.00434	0.01196	0.04405	0.389	0.0244	0.02554	0.02775	0.07321	0.026972	19.31	0.56618	0.76281	0.21708
11.501	58	0	24.81	0.00324	2.37E-05	0.00166	0.00204	0.00497	0.05027	0.439	0.02764	0.03201	0.03913	0.08293	0.007123	22.803	0.47869	0.71099	0.16993
11.782	58	0	38.715	0.00549	4.04E-05	0.00317	0.00293	0.0095	0.03179	0.277	0.01734	0.01721	0.01925	0.05203	0.016565	22.463	0.40327	0.74693	0.19845
11.925	58	0	45.802	0.00574	4.59E-05	0.00308	0.00326	0.00924	0.03732	0.323	0.02119	0.02147	0.02726	0.06358	0.021122	17.199	0.52509	0.77244	0.22256
12.106	58	0	54.769	0.00448	3.44E-05	0.00244	0.00266	0.00733	0.03737	0.326	0.02099	0.02311	0.03027	0.06296	0.013272	19.783	0.44685	0.71527	0.20234
12.208	58	0	59.802	0.00454	3.14E-05	0.00203	0.00243	0.00608	0.02563	0.222	0.0138	0.01588	0.01893	0.04141	0.015242	23.315	0.50046	0.70263	0.13776
12.388	58	0	68.729	0.00828	6.34E-05	0.00444	0.00479	0.01333	0.05318	0.483	0.02904	0.03056	0.03744	0.08712	0.045236	15.777	0.56732	0.7401	0.23156
12.491	58	0	73.806	0.00603	4.28E-05	0.00284	0.00352	0.00852	0.03727	0.383	0.01949	0.02216	0.02756	0.05847	0.056299	17.488	0.59678	0.74028	0.33552
12.631	58	0	80.751	0.00515	4.01E-05	0.00273	0.00308	0.00818	0.03958	0.342	0.02261	0.025	0.03237	0.06784	0.015884	18.634	0.43503	0.76218	0.23782
12.834	58	0	90.801	0.00611	4.18E-05	0.00347	0.00352	0.01041	0.04088	0.356	0.02096	0.02568	0.03591	0.06288	0.011063	20.027	0.57732	0.78513	0.24013
12.915	58	0	94.776	0.00611	5.01E-05	0.00336	0.00336	0.01007	0.03875	0.336	0.02056	0.02353	0.03216	0.06167	0.013105	20.189	0.43548	0.77927	0.23779
13.026	58	0	99.363	0.01169	8.96E-05	0.00686	0.00635	0.02058	0.04257	0.388	0.02098	0.02428	0.0314	0.06294	0.043399	19.879	0.54142	0.78906	0.22669
13.854	58	0	110.71	0.00605	4.36E-05	0.00261	0.00314	0.00783	0.02894	0.262	0.01555	0.01903	0.02241	0.04665	0.01863	23.293	0.45009	0.75193	0.13798
14.225	58	0	115.8	0.005	4.02E-05	0.00272	0.00292	0.00815	0.0334	0.29	0.01789	0.01917	0.02756	0.05366	0.008277	22.068	0.53737	0.78127	0.22617
14.736	58	0	122.81	0.00482	3.52E-05	0.00253	0.00292	0.00758	0.03039	0.283	0.0156	0.01709	0.02174	0.0468	0.015526	23.536	0.51222	0.72476	0.12696
15.756	58	0	136.8	0.00772	5.81E-05	0.00373	0.00282	0.0112	0.0481	0.435	0.0281	0.02873	0.03455	0.0843	0.037738	20.73	0.52081	0.79592	0.19886
16.269	58	0	143.83	0.0085	6.48E-05	0.00472	0.00488	0.01416	0.05068	0.449	0.02604	0.02895	0.04094	0.07813	0.030222	19.467	0.54286	0.7951	0.25772
16.777	58	0	150.8	0.00368	2.65E-05	0.00197	0.00205	0.00591	0.02336	0.203	0.01233	0.01254	0.0164	0.03698	0.005065	24.477	0.40292	0.71759	0.13775
17.288	58	0	157.8	0.00503	3.44E-05	0.00224	0.00266	0.00672	0.02552	0.25	0.01064	0.01239	0.02023	0.03192	0.003198	27.249	0.5123	0.77139	0.25188
17.941	58	0	166.76	0.00335	2.43E-05	0.00176	0.00173	0.00529	0.02173	0.188	0.01148	0.01236	0.01563	0.03443	0.005155	25.161	0.42794	0.70698	0.12141
18.309	58	0	171.8	0.00752	5.92E-05	0.00395	0.00382	0.01185	0.02864	0.271	0.01479	0.01502	0.02073	0.04438	0.015857	23.997	0.46317	0.77602	0.1907
18.819	58	0	178.8	0.00482	3.29E-05	0.00234	0.00211	0.00702	0.02297	0.225	0.01174	0.01313	0.01788	0.03522	0.022158	25.531	0.49237	0.74557	0.23923
11.078	58	0	3.8681	0.00702	5.42E-05	0.00348	0.00337	0.01043	0.03417	0.3	0.01744	0.01849	0.02185	0.05232	0.022507	22.414	0.56545	0.78217	0.21441
11.219	58	0	10.817	0.00543	4.01E-05	0.00297	0.00299	0.00892	0.09158	0.801	0.05055	0.06094	0.06554	0.15164	0.058784	14.354	0.63249	0.74235	0.19805
11.501	58	0	24.81	0.00379	2.79E-05	0.002	0.00216	0.00601	0.04381	0.375	0.02433	0.02713	0.03422	0.07298	0.007581	22.593	0.50858	0.68771	0.16946
11.643	58	0	31.817	0.00708	4.89E-05	0.0039	0.00335	0.0117	0.02957	0.273	0.01494	0.01617	0.0201	0.04482	0.031094	22.913	0.5689	0.69527	0.18446
11.782	58	0	38.715	0.00762	5.65E-05	0.00369	0.00265	0.01108	0.03036	0.271	0.01687	0.01715	0.02174	0.0506	0.034574	20.723	0.38924	0.74512	0.12898
11.925	58	0	45.802	0.00651	5.19E-05	0.00368	0.00395	0.01104	0.05416	0.47	0.03132	0.03252	0.04224	0.09396	0.025893	16.271	0.56284	0.78856	0.26714
12.106	58	0	54.769	0.0051	3.79E-05	0.00278	0.00297	0.00835	0.07305	0.653	0.03807	0.04782	0.05584	0.11422	0.013239	20.235	0.45219	0.71417	0.23894
12.208	58	0	59.803	0.00348	2.44E-05	0.00184	0.00207	0.00551	0.03752	0.345	0.01743	0.02236	0.03359	0.05228	0.006597	24.026	0.59353	0.67828	0.15686
12.388	58	0	68.73	0.01994	0.00015404	0.01295	0.00933	0.03886	0.10229	0.873	0.06301	0.05204	0.05673	0.18903	0.0994	13.666	0.63324	0.76484	0.28429
12.491	58	0	73.806	0.00415	3.29E-05	0.00211	0.00234	0.00632	0.02991	0.259	0.01649	0.01786	0.02375	0.04947	0.011491	20.07	0.5248	0.76337	0.20018
12.631	58	0	80.752	0.00475	3.61E-05	0.00234	0.00255	0.00702	0.0269	0.238	0.01399	0.0167	0.02321	0.04198	0.013865	19.076	0.4538	0.77705	0.18808
12.834	58	0	90.801	0.01032	7.41E-05	0.0053	0.00489	0.01589	0.04594	0.442	0.02614	0.0264	0.02905	0.07843	0.032856	17.792	0.54399	0.75126	0.20732
12.915	58	0	94.777	0.01062	9.12E-05	0.00518	0.00529	0.01555	0.06726	0.572	0.03825	0.04016	0.04613	0.11476	0.052697	18.061	0.5853	0.79459	0.2909
13.026	58	0	99.363	0.00435	3.35E-05	0.00236	0.00262	0.00709	0.03234	0.284	0.01764	0.02016	0.02412	0.05293	0.007174	22.116	0.45894	0.7921	0.18732
13.854	58	0	110.71	0.00606	4.40E-05	0.00269	0.00295	0.00808	0.03941	0.37	0.01961	0.02414	0.03305	0.05884	0.023709	20.577	0.47312	0.76062	0.21085
14.225	58	0	115.81	0.00788	6.39E-05	0.004	0.00392	0.01199	0.0413	0.357	0.0232	0.02546	0.03128	0.06961	0.019507	19.621	0.50006	0.79132	0.26028
14.736	58	0	122.81	0.00401	2.93E-05	0.00221	0.00241	0.00662	0.03282	0.284	0.01817	0.02036	0.02297	0.05451	0.007791	22.357	0.456	0.73697	0.18288
16.777	58	0	150.8	0.00475	3.47E-05	0.00206	0.00209	0.00618	0.02351	0.222	0.01129	0.01302	0.0176	0.03387	0.005347	27.364	0.43609	0.77055	0.13052
17.288	58	0	157.8	0.00993	7.14E-05	0.00552	0.00457	0.01655	0.02822	0.288	0.01474	0.01522	0.01811	0.04422	0.028818	23.859	0.47583	0.76672	0.19086
17.941	58	0	166.76	0.00417	3.01E-05	0.00195	0.00222	0.00585	0.02599	0.251	0.01146	0.01435	0.0219	0.03437	0.010793	23.144	0.61572	0.68099	0.17635
18.309	58	0	171.8	0.00712	5.71E-05	0.00337	0.00367	0.01011	0.046	0.42	0.02552	0.02719	0.03065	0.07656	0.021292	19.935	0.51439	0.77161	0.20547
18.819	58	0	178.8	0.0065	4.87E-05	0.00351	0.00355	0.01053	0.02455	0.235	0.01247	0.01429	0.01748	0.03741	0.011414	23.168	0.45536	0.74959	0.2151
23.437	57	0	7.2882	0.00565	3.15E-05	0.00321	0.00325	0.00963	0.02518	0.246	0.01442	0.01341	0.015	0.04326	0.029994	24.756	0.34321	0.56409	0.16791
23.856	57	0	14.269	0.00273	1.57E-05	0.00152	0.00165	0.00456	0.01341	0.116	0.0079	0.00786	0.00923	0.0237	0.003161	26.835	0.28564	0.56186	0.10662
24.275	57	0	21.247	0.0038	2.35E-05	0.00221	0.00237	0.00663	0.01034	0.114	0.00509	0.00544	0.00727	0.01528	0.011686	26.345	0.4085	0.57169	0.13022
24.695	57	0	28.258	0.0032	1.86E-05	0.00158	0.00182	0.00474	0.01599	0.183	0.00744	0.00822	0.0129	0.02232	0.012058	26.363	0.49948	0.5737	0.11123
25.115	57	0	35.257	0.00349	2.04E-05	0.00185	0.0022	0.00555	0.01935	0.182	0.0106	0.01098	0.0129	0.0318	0.010492	24.626	0.43941	0.58374	0.14854
25.539	57	0	42.312	0.00271	1.59E-05	0.00134	0.00157	0.00401	0.01482	0.136	0.00687	0.00747	0.01065	0.02062	0.006853	26.182	0.46574	0.55282	0.11348
25.956	57	0	49.269	0.00303	1.95E-05	0.0012	0.00152	0.0036	0.02256	0.229	0.0098	0.01349	0.0227	0.02939	0.01342	26.001	0.49492	0.5455	0.14315
26.376	57	0	56.272	0.00973	5.80E-05	0.00586	0.00548	0.01759	0.0437	0.392	0.02554	0.02444	0.0308	0.07663	0.046219	17.042	0.52283	0.56336	0.22144
26.798	57	0	63.297	0.00303	2.14E-05	0.00139	0.00188	0.00417	0.01464	0.143	0.00649	0.00789	0.01212	0.01946	0.010049	28.591	0.40023	0.5751	0.17296
27.217	57	0	70.29	0.00308	2.12E-05	0.0016	0.00176	0.00481	0.01872	0.169	0.00959	0.00991	0.01429	0.02876	0.011109	26.881	0.44475	0.55329	0.12657
27.639	57	0	77.309	0.0029	2.01E-05	0.00112	0.00168	0.00337	0.00745	0.087	0.00318	0.00377	0.00612	0.00955	0.009395	28.466	0.37566	0.58972	0.14911
28.057	57	0	84.281	0.00437	2.78E-05	0.00245	0.00228	0.00736	0.02486	0.249	0.01297	0.01333	0.01719	0.0389	0.014596	22.981	0.54027	0.57107	0.14311
28.478	57	0	91.302	0.00293	2.29E-05	0.00135	0.00178	0.00404	0.01338	0.118	0.00631	0.00788	0.01125	0.01892	0.006619	26.742	0.48993	0.58972	0.16835
28.901	57	0	98.349	0.00282	1.87E-05	0.00126	0.0016	0.00378	0.02102	0.199	0.00993	0.01143	0.01783	0.02978	0.007859	25.689	0.45832	0.55147	0.12438
28.924	57	0	105.28	0.00323	2.04E-05	0.00173	0.00173	0.00518	0.0131	0.113	0.00755	0.00789	0.009	0.02266	0.005379	26.977	0.41011	0.58472	0.12804
28.822	57	0	112.28	0.00222	1.42E-05	0.00107	0.00133	0.00322	0.01309	0.116	0.00714	0.00848	0.0111	0.02141	0.003054	27.498	0.46248	0.57545	0.10926
28.72	57	0	119.34	0.0039	2.36E-05	0.00209	0.00214	0.00626	0.02033	0.181	0.01281	0.0105	0.01306	0.03844	0.012234	24.735	0.33764	0.59536	0.1657
28.619	57	0	126.26	0.00344	2.26E-05	0.00166	0.00204	0.00499	0.01531	0.151	0.00864	0.00812	0.00983	0.02592	0.013593	25.273	0.35719	0.56889	0.1378
28.503	57	0	134.29	0.00616	5.91E-05	0.0028	0.00307	0.00841	0.02799	0.362	0.01457	0.01621	0.02181	0.04371	0.030115	19.654	0.60139	0.61335	0.2182
28.416	57	0	140.29	0.00358	2.36E-05	0.00152	0.0021	0.00457	0.01137	0.13	0.00588	0.00658	0.00751	0.01764	0.020118	28.229	0.35285	0.58688	0.13673
28.315	57	0	147.3	0.00219	1.31E-05	0.00112	0.00136	0.00337	0.00975	0.085	0.00554	0.00569	0.0072	0.01663	0.002471	27.565	0.33545	0.56912	0.11044
28.213	57	0	154.3	0.00484	2.87E-05	0.00268	0.00271	0.00804	0.02545	0.233	0.0141	0.01556	0.0181	0.04231	0.013907	24.701	0.41658	0.58372	0.18948
28.112	57	0	161.28	0.00323	2.05E-05	0.00153	0.00147	0.0046	0.01502	0.153	0.00661	0.00816	0.01107	0.01982	0.006686	28.213	0.52468	0.5536	0.12508
28.011	57	0	168.27	0.00199	1.31E-05	0.00087	0.00115	0.00261	0.0112	0.109	0.00573	0.00707	0.00952	0.0172	0.004082	29.682	0.40309	0.55386	0.10145
23.437	57	0	7.2882	0.00695	3.91E-05	0.00389	0.00361	0.01166	0.02426	0.213	0.01349	0.01431	0.01684	0.04048	0.018448	19.743	0.46319	0.56117	0.23611
23.856	57	0	14.269	0.00285	1.66E-05	0.00126	0.00166	0.00377	0.01869	0.164	0.01028	0.01137	0.01371	0.03085	0.00532	25.487	0.3737	0.56502	0.16962
24.275	57	0	21.247	0.00218	1.37E-05	0.0009	0.00116	0.00271	0.00921	0.096	0.00395	0.00482	0.00738	0.01185	0.007106	28.548	0.45048	0.55849	0.094137
24.695	57	0	28.258	0.00304	1.73E-05	0.00157	0.00151	0.00472	0.01205	0.109	0.00621	0.0069	0.00798	0.01863	0.00797	25.8	0.45504	0.56679	0.10346
25.115	57	0	35.257	0.0031	1.80E-05	0.00142	0.00186	0.00427	0.01535	0.159	0.00825	0.00877	0.01145	0.02474	0.009296	24.819	0.40964	0.57742	0.16018
25.539	57	0	42.313	0.00342	2.00E-05	0.00171	0.002	0.00512	0.01824	0.164	0.01023	0.01126	0.01398	0.0307	0.008801	24.258	0.43464	0.55232	0.17866
25.956	57	0	49.27	0.00465	2.99E-05	0.00237	0.00218	0.00711	0.0249	0.243	0.01335	0.01393	0.01888	0.04004	0.02128	20.837	0.55424	0.56125	0.1718
26.376	57	0	56.272	0.00266	1.56E-05	0.00134	0.00158	0.00401	0.01525	0.133	0.00832	0.00906	0.01139	0.02497	0.004368	25.433	0.38945	0.55488	0.15274
26.798	57	0	63.297	0.00276	1.94E-05	0.0012	0.0014	0.00359	0.01259	0.126	0.00605	0.0069	0.01005	0.01815	0.007363	28.811	0.39748	0.56321	0.10199
27.217	57	0	70.29	0.00211	1.45E-05	0.00088	0.00127	0.00264	0.01198	0.111	0.00612	0.00773	0.01066	0.01836	0.00258	28.323	0.41589	0.55266	0.11933
27.639	57	0	77.309	0.0016	1.09E-05	0.00067	0.00097	0.00202	0.00306	0.026	0.00161	0.00194	0.00249	0.00484	0.001468	30.794	0.3202	0.58602	0.092377
28.057	57	0	84.281	0.00275	1.74E-05	0.00121	0.00162	0.00364	0.02683	0.245	0.01463	0.01552	0.02094	0.0439	0.010219	24.736	0.5773	0.57902	0.15778
28.478	57	0	91.303	0.00319	2.46E-05	0.00132	0.00182	0.00396	0.01454	0.149	0.00592	0.0077	0.01386	0.01776	0.010788	26.586	0.43212	0.58266	0.16156
28.901	57	0	98.349	0.00307	1.96E-05	0.00138	0.00169	0.00415	0.01989	0.192	0.00977	0.01097	0.01574	0.02932	0.012086	24.941	0.53105	0.55376	0.1559
28.924	57	0	105.28	0.00231	1.46E-05	0.00103	0.00131	0.0031	0.01807	0.16	0.0097	0.01107	0.01408	0.02911	0.004384	27.729	0.51773	0.57525	0.12723
28.822	57	0	112.28	0.0033	2.08E-05	0.00156	0.00153	0.00469	0.02112	0.198	0.01203	0.01199	0.0153	0.03608	0.009033	25.773	0.53881	0.57505	0.12688
28.72	57	0	119.34	0.00279	1.65E-05	0.0013	0.0016	0.00391	0.00936	0.09	0.0043	0.00512	0.00725	0.01291	0.005905	26.909	0.30095	0.59214	0.13712
28.619	57	0	126.26	0.00256	1.65E-05	0.00106	0.00149	0.00318	0.01179	0.138	0.0054	0.00681	0.00856	0.0162	0.008511	28.389	0.41678	0.56538	0.14512
28.503	57	0	134.29	0.00415	2.61E-05	0.00194	0.00263	0.00581	0.02074	0.199	0.01039	0.01344	0.01721	0.03116	0.015662	23.194	0.42781	0.60198	0.21213
28.416	57	0	140.29	0.00201	1.29E-05	0.00071	0.0011	0.00214	0.00607	0.075	0.00211	0.00238	0.0041	0.00632	0.006514	29.334	0.39762	0.58354	0.10964
28.315	57	0	147.3	0.00386	2.31E-05	0.00179	0.00174	0.00537	0.0161	0.166	0.00774	0.00846	0.0117	0.02321	0.016934	25.325	0.42942	0.57787	0.1241
28.213	57	0	154.3	0.00306	1.79E-05	0.0017	0.00167	0.0051	0.01073	0.093	0.00579	0.00648	0.00811	0.01738	0.003481	26.262	0.35879	0.57528	0.115
28.112	57	0	161.28	0.00271	1.75E-05	0.00126	0.00137	0.00377	0.01318	0.126	0.00613	0.00798	0.01194	0.01838	0.010999	28.195	0.4918	0.54316	0.11811
28.011	57	0	168.27	0.00213	1.39E-05	0.00088	0.0014	0.00265	0.01236	0.108	0.00607	0.0079	0.01076	0.01822	0.002507	27.71	0.44517	0.5523	0.15361
23.437	57	0	7.2882	0.00527	2.95E-05	0.00292	0.00324	0.00876	0.0262	0.23	0.01465	0.01629	0.01951	0.04396	0.012843	21.32	0.40321	0.56096	0.22595
23.856	57	0	14.27	0.00336	1.89E-05	0.00166	0.00188	0.00499	0.01152	0.129	0.00568	0.00607	0.00787	0.01705	0.015868	25.338	0.35639	0.56018	0.14968
24.275	57	0	21.247	0.0022	1.33E-05	0.00084	0.00135	0.00252	0.0246	0.226	0.01095	0.01694	0.02698	0.03284	0.005701	26.857	0.35319	0.56978	0.18306
24.695	57	0	28.258	0.00411	2.33E-05	0.00208	0.00263	0.00625	0.01558	0.159	0.00769	0.00941	0.01279	0.02307	0.017281	21.689	0.44617	0.55473	0.15866
25.115	57	0	35.258	0.00285	1.63E-05	0.00116	0.00155	0.00347	0.0123	0.124	0.00551	0.00672	0.01081	0.01654	0.007114	25.27	0.44941	0.57241	0.18566
25.539	57	0	42.313	0.00279	1.61E-05	0.00156	0.00166	0.00468	0.01797	0.155	0.01053	0.011	0.01249	0.0316	0.00443	25.384	0.36084	0.54866	0.11675
25.956	57	0	49.27	0.00429	2.69E-05	0.0019	0.00216	0.0057	0.03277	0.291	0.01821	0.01951	0.02183	0.05462	0.021301	21.171	0.56542	0.55683	0.19311
26.376	57	0	56.272	0.00324	1.86E-05	0.00159	0.00169	0.00478	0.02285	0.215	0.01178	0.01316	0.01738	0.03534	0.009742	25.976	0.4118	0.55511	0.14867
26.798	57	0	63.297	0.00336	2.38E-05	0.00153	0.00115	0.00458	0.00937	0.091	0.00424	0.00512	0.00801	0.01273	0.011135	29.991	0.45961	0.56187	0.11251
27.217	57	0	70.29	0.00543	3.72E-05	0.00283	0.00181	0.0085	0.01269	0.121	0.00686	0.00676	0.00907	0.02059	0.020956	28.572	0.46978	0.54818	0.13313
27.639	57	0	77.309	0.00242	1.67E-05	0.00107	0.00118	0.00322	0.00611	0.058	0.00286	0.00327	0.005	0.00859	0.006866	29.104	0.3583	0.58419	0.10207
28.057	57	0	84.281	0.0027	1.69E-05	0.00127	0.00157	0.00381	0.02367	0.212	0.01234	0.01406	0.01874	0.03703	0.006485	24.824	0.57336	0.57526	0.15282
28.478	57	0	91.303	0.00338	2.58E-05	0.00178	0.00175	0.00533	0.02073	0.192	0.0116	0.01285	0.01459	0.03479	0.009831	26.117	0.43452	0.58845	0.16073
28.901	57	0	98.349	0.00219	1.43E-05	0.00112	0.00145	0.00336	0.0233	0.205	0.01342	0.01462	0.01574	0.04027	0.004507	25.643	0.38783	0.54811	0.11593
28.924	57	0	105.28	0.00366	2.29E-05	0.00185	0.00169	0.00554	0.02614	0.231	0.01387	0.01492	0.01828	0.04161	0.008973	25.662	0.51054	0.5724	0.14974
28.822	57	0	112.28	0.00259	1.59E-05	0.00106	0.00139	0.00319	0.0148	0.134	0.00756	0.00878	0.01259	0.02268	0.004656	27.523	0.44223	0.57384	0.14447
28.72	57	0	119.34	0.00277	1.63E-05	0.00148	0.00157	0.00443	0.00929	0.087	0.00438	0.00468	0.00678	0.01315	0.003185	26.991	0.31142	0.58957	0.13203
28.619	57	0	126.26	0.00219	1.43E-05	0.001	0.00113	0.003	0.00681	0.074	0.0028	0.00345	0.0054	0.00841	0.00662	28.472	0.37897	0.57466	0.10745
28.503	57	0	134.29	0.00657	4.15E-05	0.00328	0.00338	0.00984	0.02009	0.194	0.01046	0.01279	0.01609	0.03139	0.035157	22.698	0.55055	0.59337	0.31501
28.416	57	0	140.29	0.00295	1.89E-05	0.00125	0.00169	0.00376	0.00629	0.061	0.0029	0.00349	0.00445	0.00871	0.009439	28.387	0.41477	0.59284	0.14685
28.315	57	0	147.3	0.00253	1.51E-05	0.00121	0.00149	0.00363	0.00899	0.082	0.00452	0.00487	0.006	0.01355	0.008869	26.234	0.34657	0.57436	0.14924
28.213	57	0	154.3	0.00259	1.50E-05	0.00135	0.00149	0.00405	0.01296	0.116	0.00672	0.00797	0.01018	0.02017	0.003923	27.272	0.31663	0.57301	0.098257
28.112	57	0	161.28	0.00289	1.84E-05	0.00128	0.00135	0.00383	0.0103	0.104	0.00485	0.00558	0.00771	0.01454	0.0093	27.785	0.4938	0.54342	0.13077
28.011	57	0	168.27	0.00355	2.32E-05	0.00135	0.00119	0.00404	0.01408	0.127	0.00678	0.0085	0.0112	0.02033	0.018264	27.733	0.50847	0.55319	0.16096
23.437	57	0	7.2896	0.00392	2.34E-05	0.00187	0.00214	0.00562	0.01765	0.195	0.00904	0.0105	0.01443	0.02711	0.024464	27.149	0.37463	0.54994	0.17039
23.856	57	0	14.272	0.00385	2.29E-05	0.00175	0.00173	0.00524	0.02034	0.193	0.0093	0.01069	0.01607	0.02791	0.010128	25.88	0.41154	0.56456	0.15643
24.275	57	0	21.249	0.00506	3.20E-05	0.00178	0.00205	0.00535	0.01872	0.177	0.00945	0.01196	0.01632	0.02836	0.02509	24.446	0.53614	0.55612	0.2574
24.696	57	0	28.26	0.00275	1.63E-05	0.00119	0.00152	0.00356	0.02241	0.229	0.01116	0.01181	0.017	0.03349	0.009273	24.516	0.44742	0.56217	0.143
25.116	57	0	35.259	0.00227	1.37E-05	0.00101	0.00143	0.00302	0.01306	0.121	0.00646	0.00766	0.01013	0.01938	0.004323	26.074	0.45045	0.56876	0.13775
25.539	57	0	42.314	0.00225	1.36E-05	0.00106	0.00138	0.00317	0.01879	0.188	0.00905	0.01029	0.01477	0.02715	0.005758	25.439	0.4871	0.5431	0.10054
25.956	57	0	49.272	0.00229	1.42E-05	0.00107	0.0013	0.00322	0.02049	0.187	0.01059	0.01281	0.01762	0.03177	0.004977	26.755	0.50707	0.54543	0.13455
26.376	57	0	56.274	0.0026	1.53E-05	0.00141	0.00148	0.00422	0.02	0.174	0.01168	0.01219	0.01399	0.03503	0.003322	26.683	0.311	0.5562	0.11182
26.798	57	0	63.298	0.00297	2.18E-05	0.00123	0.00175	0.0037	0.01558	0.142	0.00784	0.00986	0.01309	0.02351	0.006209	26.983	0.38762	0.57218	0.18275
27.217	57	0	70.292	0.00421	3.11E-05	0.00178	0.00197	0.00535	0.01827	0.175	0.00927	0.01038	0.01333	0.0278	0.012787	23.428	0.48907	0.5681	0.18704
27.639	57	0	77.31	0.00229	1.64E-05	0.00111	0.00137	0.00334	0.00741	0.069	0.00335	0.00402	0.0054	0.01004	0.003048	27.987	0.36804	0.59402	0.14037
28.057	57	0	84.283	0.00235	1.49E-05	0.00108	0.00146	0.00325	0.01683	0.156	0.0085	0.01035	0.01378	0.02549	0.008807	26.736	0.54514	0.5537	0.12223
28.478	57	0	91.304	0.00414	3.38E-05	0.00206	0.00213	0.00618	0.01885	0.17	0.00973	0.01106	0.01287	0.02918	0.009376	23.751	0.36555	0.59351	0.15426
28.901	57	0	98.351	0.00217	1.41E-05	0.00102	0.00134	0.00306	0.02621	0.238	0.01389	0.01502	0.02165	0.04168	0.003546	26.683	0.4642	0.5422	0.13589
28.924	57	0	105.28	0.00316	2.00E-05	0.00135	0.00173	0.00406	0.01908	0.181	0.0088	0.01123	0.01801	0.02641	0.015346	26.449	0.53658	0.55197	0.16143
28.822	57	0	112.28	0.00334	2.07E-05	0.0015	0.00186	0.00449	0.01589	0.175	0.00805	0.01036	0.01137	0.02414	0.008844	26.789	0.42403	0.56971	0.14679
28.72	57	0	119.34	0.00451	2.87E-05	0.00207	0.00244	0.00622	0.01557	0.162	0.0069	0.0086	0.01158	0.02071	0.024581	25.405	0.46978	0.57965	0.23698
28.619	57	0	126.26	0.00258	1.69E-05	0.00115	0.00131	0.00345	0.00631	0.079	0.00193	0.00278	0.00454	0.0058	0.006779	28.83	0.34234	0.58921	0.097793
28.503	57	0	134.29	0.00296	1.96E-05	0.00143	0.00166	0.00428	0.01059	0.094	0.00547	0.00671	0.00888	0.01641	0.008311	27.655	0.45724	0.58076	0.13055
28.416	57	0	140.29	0.0036	2.25E-05	0.00179	0.00201	0.00536	0.00494	0.047	0.00278	0.00265	0.0032	0.00834	0.013299	26.147	0.42057	0.60209	0.10514
28.315	57	0	147.3	0.00299	1.83E-05	0.00142	0.00156	0.00425	0.01411	0.157	0.00636	0.00769	0.01187	0.01909	0.015223	28.319	0.44385	0.53129	0.12
28.213	57	0	154.31	0.00405	2.26E-05	0.00201	0.00196	0.00603	0.01676	0.166	0.00787	0.00853	0.01414	0.02362	0.011266	24.871	0.48615	0.60457	0.18151
28.112	57	0	161.28	0.00198	1.26E-05	0.00094	0.00122	0.00281	0.01511	0.142	0.00756	0.00997	0.01272	0.02269	0.002773	28.397	0.45309	0.555	0.10926
28.011	57	0	168.27	0.00231	1.52E-05	0.00101	0.00135	0.00303	0.01416	0.138	0.00639	0.00858	0.0146	0.01918	0.004072	27.369	0.43286	0.55108	0.1444
23.437	57	0	7.2903	0.00433	2.29E-05	0.00213	0.00264	0.00638	0.01205	0.114	0.00558	0.00664	0.00827	0.01674	0.017805	22.979	0.39077	0.55398	0.23649
23.856	57	0	14.272	0.00257	1.36E-05	0.00117	0.00151	0.00352	0.01592	0.158	0.00777	0.00972	0.01253	0.02332	0.007887	25.46	0.29753	0.5577	0.1591
24.275	57	0	21.249	0.00292	1.83E-05	0.00138	0.00161	0.00414	0.0116	0.118	0.00538	0.0063	0.0095	0.01614	0.011256	27.13	0.43188	0.55525	0.15946
24.696	57	0	28.26	0.00236	1.32E-05	0.00115	0.00149	0.00346	0.02029	0.187	0.01054	0.01173	0.01409	0.03161	0.005883	25.119	0.40636	0.55597	0.13438
25.116	57	0	35.259	0.00268	1.47E-05	0.00113	0.00137	0.00339	0.00936	0.088	0.00472	0.00518	0.00704	0.01417	0.010293	26.647	0.31533	0.56631	0.12988
25.539	57	0	42.314	0.00262	1.44E-05	0.00138	0.00161	0.00414	0.01913	0.165	0.01151	0.01047	0.01295	0.03453	0.005771	24.59	0.34075	0.55183	0.13826
25.956	57	0	49.272	0.00274	1.52E-05	0.00125	0.00145	0.00376	0.01276	0.128	0.00676	0.00673	0.0081	0.02027	0.008699	26.516	0.37267	0.54384	0.13801
26.376	57	0	56.274	0.00605	3.26E-05	0.00319	0.002	0.00956	0.01643	0.162	0.00916	0.00899	0.01211	0.02748	0.022961	24.519	0.41612	0.55205	0.15774
26.798	57	0	63.299	0.00234	1.60E-05	0.00101	0.00109	0.00304	0.00998	0.094	0.00481	0.00561	0.00782	0.01443	0.005034	30.169	0.50799	0.55819	0.09978
27.217	57	0	70.292	0.00438	2.92E-05	0.00249	0.00235	0.00746	0.01729	0.174	0.00875	0.01	0.01293	0.02625	0.03525	27.061	0.4615	0.55406	0.13559
27.639	57	0	77.311	0.00258	1.71E-05	0.00114	0.00139	0.00343	0.00379	0.034	0.00185	0.00222	0.00318	0.00554	0.006913	28.173	0.3468	0.59049	0.12589
28.057	57	0	84.283	0.00381	2.11E-05	0.00164	0.00192	0.00492	0.02806	0.272	0.01487	0.01613	0.02208	0.04461	0.015406	22.213	0.55376	0.55944	0.19393
28.478	57	0	91.305	0.00243	1.76E-05	0.00108	0.00124	0.00323	0.01147	0.105	0.00625	0.00658	0.00834	0.01874	0.00575	28.897	0.46124	0.58305	0.12722
28.901	57	0	98.351	0.00352	1.93E-05	0.00164	0.00199	0.00492	0.02369	0.218	0.01286	0.01318	0.01818	0.03859	0.012729	23.457	0.41807	0.55011	0.16941
28.924	57	0	105.28	0.00456	2.58E-05	0.00177	0.00202	0.00531	0.01728	0.16	0.00941	0.00977	0.01181	0.02823	0.016088	23.783	0.43015	0.56356	0.23328
28.822	57	0	112.28	0.00246	1.40E-05	0.00118	0.00154	0.00354	0.00771	0.067	0.0039	0.00507	0.00705	0.0117	0.003049	27.071	0.28219	0.57976	0.1386
28.72	57	0	119.34	0.00349	1.94E-05	0.00166	0.00173	0.00498	0.01148	0.115	0.00547	0.00634	0.00823	0.01642	0.014043	24.733	0.38806	0.6045	0.14288
28.619	57	0	126.26	0.0028	1.64E-05	0.00115	0.00147	0.00345	0.00455	0.041	0.00232	0.00258	0.00346	0.00696	0.00943	24.56	0.5388	0.56981	0.13988
28.503	57	0	134.29	0.00238	1.52E-05	0.00117	0.00134	0.0035	0.00959	0.116	0.0037	0.00472	0.00773	0.01109	0.011303	27.139	0.36706	0.56694	0.16577
28.416	57	0	140.29	0.00361	1.98E-05	0.00195	0.00208	0.00586	0.00483	0.049	0.00205	0.00235	0.00292	0.00616	0.015822	26.904	0.32565	0.61054	0.1439
28.314	57	0	147.3	0.00219	1.25E-05	0.00101	0.00131	0.00304	0.01499	0.135	0.00822	0.00813	0.00969	0.02466	0.004727	25.906	0.44104	0.54795	0.11869
28.213	57	0	154.31	0.00262	1.41E-05	0.00106	0.00126	0.00317	0.00502	0.052	0.00214	0.00252	0.00296	0.00641	0.005725	30.188	0.31728	0.58255	0.10498
28.112	57	0	161.28	0.00338	1.95E-05	0.00169	0.00211	0.00508	0.0153	0.137	0.0085	0.00997	0.01202	0.02551	0.006451	23.527	0.33058	0.57341	0.1971
28.011	57	0	168.27	0.00244	1.52E-05	0.00098	0.00143	0.00295	0.01201	0.132	0.00524	0.00699	0.01123	0.01573	0.008423	27.496	0.47857	0.53548	0.151
23.437	57	0	7.2903	0.00388	2.05E-05	0.00173	0.00248	0.0052	0.01486	0.135	0.00721	0.00883	0.0106	0.02163	0.012198	20.663	0.40893	0.56222	0.24453
23.856	57	0	14.272	0.00361	1.90E-05	0.00153	0.00182	0.00458	0.01571	0.139	0.00813	0.00869	0.01102	0.02439	0.017296	23.367	0.42503	0.55835	0.20049
24.275	57	0	21.249	0.00481	2.54E-05	0.0023	0.00293	0.00689	0.01704	0.157	0.00864	0.00984	0.01334	0.02592	0.019653	21.598	0.43675	0.56445	0.26846
24.696	57	0	28.26	0.00332	1.72E-05	0.0014	0.00168	0.00421	0.02279	0.222	0.01038	0.01158	0.01812	0.03113	0.010464	23.291	0.45126	0.54897	0.18365
25.116	57	0	35.26	0.00358	1.94E-05	0.00175	0.00204	0.00526	0.01355	0.128	0.00728	0.00742	0.0078	0.02183	0.00937	24.539	0.33871	0.57256	0.15605
25.539	57	0	42.315	0.00393	2.11E-05	0.002	0.00204	0.006	0.02718	0.259	0.01483	0.01619	0.01831	0.04449	0.019184	21.391	0.50929	0.55048	0.20126
25.956	57	0	49.272	0.00338	1.82E-05	0.00139	0.0019	0.00417	0.01275	0.149	0.00529	0.00657	0.0101	0.01586	0.012655	23.466	0.41652	0.552	0.18154
26.376	57	0	56.274	0.00608	3.16E-05	0.00339	0.00343	0.01017	0.03161	0.294	0.01631	0.01813	0.02265	0.04893	0.022803	19.683	0.54199	0.55517	0.24193
26.798	57	0	63.299	0.00351	2.32E-05	0.00164	0.00193	0.00493	0.01623	0.15	0.00793	0.00937	0.01443	0.02378	0.008297	25.315	0.49024	0.56472	0.16409
27.218	57	0	70.292	0.00178	1.19E-05	0.00082	0.0011	0.00247	0.01171	0.106	0.00611	0.00714	0.0094	0.01833	0.002339	28.345	0.37016	0.57583	0.097894
27.639	57	0	77.311	0.00267	1.79E-05	0.00122	0.00149	0.00365	0.00504	0.045	0.00266	0.00306	0.00403	0.00797	0.006192	25.992	0.3721	0.60115	0.14956
28.057	57	0	84.283	0.00419	2.31E-05	0.00202	0.00239	0.00606	0.02909	0.265	0.01588	0.01674	0.0224	0.04765	0.019491	21.15	0.51973	0.54887	0.21133
28.478	57	0	91.305	0.00338	2.42E-05	0.00161	0.00173	0.00484	0.02276	0.2	0.01244	0.01349	0.01611	0.03732	0.009802	25.103	0.43917	0.59164	0.1537
28.901	57	0	98.351	0.00358	1.88E-05	0.00171	0.00204	0.00512	0.02802	0.251	0.01487	0.01723	0.02364	0.0446	0.013406	21.184	0.51255	0.5462	0.18942
28.924	57	0	105.28	0.00255	1.40E-05	0.00124	0.0015	0.00373	0.01444	0.126	0.00758	0.00917	0.0105	0.02275	0.004725	27.769	0.35711	0.55511	0.12201
28.822	57	0	112.28	0.00484	2.77E-05	0.00237	0.00234	0.00712	0.01469	0.146	0.00761	0.00863	0.01222	0.02284	0.01919	23.408	0.40258	0.57722	0.21132
28.72	57	0	119.34	0.00251	1.39E-05	0.00115	0.0015	0.00346	0.00858	0.075	0.00448	0.00527	0.00759	0.01344	0.005175	24.896	0.31188	0.60739	0.17808
28.619	57	0	126.26	0.00325	1.83E-05	0.00163	0.00158	0.00489	0.00648	0.068	0.00278	0.00336	0.00439	0.00834	0.007587	23.917	0.47383	0.58918	0.1339
28.503	57	0	134.29	0.00312	1.98E-05	0.00122	0.0015	0.00366	0.01499	0.144	0.00639	0.00833	0.01305	0.01918	0.012927	25.034	0.52418	0.59208	0.15011
28.416	57	0	140.29	0.00341	1.83E-05	0.0014	0.00165	0.00421	0.00621	0.059	0.00301	0.00372	0.00415	0.00903	0.007827	25.282	0.42823	0.6047	0.17424
28.314	57	0	147.3	0.00271	1.53E-05	0.00121	0.00152	0.00364	0.01682	0.164	0.0085	0.00931	0.012	0.0255	0.009207	24.78	0.50715	0.53524	0.16281
28.213	57	0	154.31	0.00406	2.15E-05	0.00229	0.00194	0.00688	0.01384	0.124	0.00805	0.00705	0.00933	0.02416	0.008729	23.606	0.36186	0.58656	0.12616
28.112	57	0	161.28	0.00483	2.73E-05	0.00267	0.00262	0.008	0.0131	0.114	0.00753	0.00798	0.00922	0.02259	0.029153	20.669	0.39787	0.57523	0.16489
28.011	57	0	168.27	0.00364	2.15E-05	0.00173	0.00198	0.00518	0.01817	0.164	0.00919	0.01105	0.01563	0.02756	0.009299	23.586	0.39811	0.55307	0.22729
10.737	74	0	9.6868	0.0041	3.40E-05	0.00163	0.00235	0.00488	0.03048	0.273	0.01378	0.01821	0.03138	0.04134	0.021982	20.493	0.7039	0.57545	0.18837
11.27	74	0	16.693	0.00382	3.01E-05	0.00184	0.00201	0.00553	0.04837	0.487	0.02639	0.02768	0.03145	0.07916	0.035854	18.047	0.67613	0.62512	0.20147
11.803	74	0	23.697	0.0032	2.51E-05	0.00144	0.00166	0.00432	0.03929	0.325	0.0215	0.02427	0.03165	0.06449	0.011289	21.204	0.686	0.61909	0.1366
12.338	74	0	30.722	0.00574	4.13E-05	0.00239	0.00306	0.00717	0.04417	0.44	0.02223	0.0281	0.03503	0.0667	0.054963	19.12	0.67484	0.58584	0.28119
12.941	74	0	38.656	0.0125	9.56E-05	0.00685	0.00715	0.02054	0.10863	1.085	0.05965	0.07032	0.0898	0.17896	0.10993	12.332	0.70036	0.692	0.34755
13.4	74	0	44.688	0.00505	4.11E-05	0.00231	0.00269	0.00692	0.05153	0.51	0.02884	0.03113	0.0377	0.08652	0.023424	20.252	0.66616	0.58639	0.21238
13.934	74	0	51.701	0.00411	3.39E-05	0.00144	0.00206	0.00431	0.04347	0.398	0.02218	0.02606	0.0377	0.06655	0.020825	19.469	0.64995	0.64474	0.18809
14.466	74	0	58.702	0.00688	5.37E-05	0.00288	0.00288	0.00865	0.07504	0.649	0.04156	0.04153	0.0529	0.12467	0.057907	16.877	0.71534	0.64677	0.24156
15.002	74	0	65.741	0.00559	4.30E-05	0.00319	0.00301	0.00957	0.04272	0.364	0.0232	0.02746	0.03218	0.06959	0.047293	17.213	0.6821	0.64837	0.16159
15.53	74	0	72.68	0.00432	3.26E-05	0.0019	0.00231	0.00569	0.05788	0.529	0.03122	0.03641	0.03967	0.09365	0.014152	19.444	0.68008	0.69246	0.21701
16.062	74	0	79.667	0.004	3.08E-05	0.00146	0.0019	0.00438	0.04273	0.363	0.02293	0.02441	0.03271	0.06878	0.015856	20.006	0.67009	0.62271	0.18418
17.012	74	0	92.551	0.00643	5.20E-05	0.00233	0.00315	0.00699	0.04335	0.442	0.02066	0.02539	0.03338	0.06198	0.039815	17.817	0.686	0.64033	0.27348
17.218	74	0	101.72	0.00529	3.92E-05	0.00196	0.00255	0.00587	0.04886	0.427	0.02489	0.02775	0.03816	0.07466	0.040588	18.496	0.67304	0.62674	0.23125
17.353	74	0	107.73	0.01081	8.45E-05	0.00591	0.00566	0.01774	0.10216	0.794	0.05656	0.05558	0.05538	0.16967	0.089444	15.016	0.70039	0.68373	0.31976
17.51	74	0	114.7	0.00754	6.08E-05	0.0032	0.00378	0.0096	0.08826	0.834	0.04738	0.05436	0.07946	0.14215	0.049463	16.781	0.69433	0.62282	0.25614
17.67	74	0	121.8	0.00386	3.10E-05	0.00132	0.00205	0.00395	0.04237	0.331	0.02148	0.02669	0.0382	0.06443	0.012921	21.436	0.66025	0.60966	0.19961
17.826	74	0	128.76	0.00602	4.78E-05	0.00289	0.00293	0.00866	0.04404	0.37	0.02408	0.02549	0.03248	0.07223	0.033231	19.199	0.68543	0.62147	0.21993
17.983	74	0	135.73	0.00802	6.36E-05	0.00405	0.00457	0.01216	0.06982	0.664	0.04155	0.03319	0.04113	0.12465	0.049771	16.861	0.70191	0.60355	0.28006
18.139	74	0	142.7	0.00583	4.76E-05	0.00231	0.00284	0.00692	0.04593	0.381	0.02705	0.02533	0.03473	0.08115	0.023483	18.678	0.62759	0.6006	0.24513
18.298	74	0	149.78	0.00436	3.57E-05	0.00149	0.00202	0.00446	0.03512	0.347	0.01671	0.02106	0.03264	0.05014	0.017489	21.557	0.61773	0.60001	0.20794
18.454	74	0	156.71	0.00754	5.97E-05	0.004	0.00437	0.01199	0.07592	0.712	0.0462	0.03954	0.04578	0.13859	0.068337	17.174	0.67298	0.61015	0.2956
18.63	74	0	164.53	0.00773	6.14E-05	0.00254	0.00321	0.00763	0.03722	0.359	0.01802	0.02238	0.03305	0.05407	0.035795	18.189	0.6917	0.62622	0.29922
18.77	74	0	170.76	0.0082	6.35E-05	0.00429	0.00379	0.01288	0.06635	0.517	0.0387	0.03491	0.0467	0.1161	0.055807	18.783	0.67497	0.63997	0.26188
10.737	74	0	9.6875	0.0044	3.86E-05	0.0017	0.00239	0.00509	0.04635	0.442	0.02341	0.02641	0.03512	0.07024	0.032759	17.544	0.67282	0.60335	0.19951
11.27	74	0	16.693	0.00537	4.46E-05	0.0033	0.0028	0.00989	0.23915	1.97	0.16267	0.16246	0.16184	0.48802	0.07193	13.308	0.66163	0.64624	0.15161
11.803	74	0	23.697	0.00767	5.81E-05	0.00421	0.00438	0.01264	0.086	0.716	0.0435	0.04259	0.04193	0.1305	0.080363	16.463	0.71801	0.62463	0.28875
12.338	74	0	30.722	0.00585	4.59E-05	0.00312	0.00283	0.00936	0.06045	0.52	0.03351	0.03025	0.03937	0.10052	0.04847	18.37	0.68725	0.58825	0.20562
12.941	74	0	38.656	0.00752	5.66E-05	0.00369	0.00335	0.01108	0.13237	1.204	0.06848	0.09191	0.11694	0.20544	0.10057	12.733	0.76157	0.69474	0.20014
13.4	74	0	44.688	0.00932	7.49E-05	0.00439	0.00522	0.01318	0.09076	0.893	0.05028	0.06056	0.07632	0.15084	0.056572	17.831	0.62653	0.58865	0.24435
13.934	74	0	51.701	0.00474	3.51E-05	0.00178	0.00225	0.00535	0.03339	0.316	0.01779	0.01917	0.02492	0.05338	0.033816	19.976	0.66909	0.65659	0.33832
14.466	74	0	58.702	0.00488	3.77E-05	0.00258	0.00261	0.00775	0.05151	0.467	0.02948	0.03415	0.0368	0.08845	0.054317	19.24	0.68479	0.65205	0.20636
15.002	74	0	65.742	0.00476	3.42E-05	0.00216	0.00238	0.00648	0.0478	0.424	0.02797	0.02655	0.0321	0.0839	0.04079	18.637	0.70959	0.64353	0.36141
15.53	74	0	72.681	0.00579	4.36E-05	0.00306	0.00315	0.00919	0.0451	0.407	0.02352	0.02603	0.03244	0.07055	0.023121	18.503	0.69165	0.68394	0.21973
16.062	74	0	79.667	0.00502	4.14E-05	0.00233	0.00259	0.00698	0.03961	0.353	0.02236	0.02563	0.03024	0.06709	0.029464	20.906	0.69062	0.61981	0.18153
17.012	74	0	92.552	0.00397	3.28E-05	0.00175	0.00199	0.00526	0.0421	0.362	0.02308	0.02496	0.03379	0.06923	0.019139	19.578	0.6849	0.63919	0.15923
17.218	74	0	101.72	0.00551	4.51E-05	0.00274	0.00304	0.00821	0.05044	0.441	0.0271	0.03117	0.03668	0.0813	0.034683	20.092	0.68236	0.63536	0.26047
17.353	74	0	107.73	0.01245	0.00010317	0.00745	0.007	0.02234	0.13949	1.228	0.07943	0.07264	0.08046	0.2383	0.074239	14.378	0.60168	0.70951	0.35368
17.51	74	0	114.7	0.00351	2.88E-05	0.00119	0.00192	0.00356	0.03225	0.295	0.01615	0.01881	0.02782	0.04845	0.015856	21.617	0.63675	0.61999	0.15297
17.67	74	0	121.8	0.00436	3.52E-05	0.00161	0.00209	0.00484	0.03659	0.33	0.02013	0.02211	0.02819	0.0604	0.024721	19.452	0.64666	0.65332	0.1878
17.826	74	0	128.76	0.00394	3.34E-05	0.00179	0.00236	0.00536	0.03722	0.314	0.01945	0.02424	0.02756	0.05836	0.02579	20.225	0.62721	0.62071	0.16921
17.983	74	0	135.73	0.00411	3.36E-05	0.00171	0.00212	0.00514	0.03659	0.335	0.01785	0.02189	0.03054	0.05354	0.027503	19.003	0.6999	0.61681	0.1631
18.139	74	0	142.7	0.00431	3.60E-05	0.00157	0.00212	0.0047	0.02188	0.195	0.01196	0.01389	0.01696	0.03589	0.01141	22.098	0.53997	0.60875	0.18004
18.298	74	0	149.78	0.00455	3.71E-05	0.00147	0.00197	0.00442	0.02622	0.239	0.01179	0.01643	0.02402	0.03538	0.012939	22.271	0.61323	0.61262	0.17517
18.454	74	0	156.71	0.00481	3.98E-05	0.00216	0.0027	0.00647	0.05452	0.493	0.03112	0.03254	0.03554	0.09335	0.02624	21.433	0.61433	0.6347	0.22434
18.63	74	0	164.53	0.00372	3.03E-05	0.00113	0.0019	0.00338	0.02883	0.277	0.01403	0.01745	0.02781	0.04209	0.016578	23.268	0.65613	0.61494	0.16932
18.77	74	0	170.76	0.00616	4.93E-05	0.00335	0.00375	0.01005	0.07849	0.662	0.04485	0.04675	0.04854	0.13455	0.027431	19.849	0.5833	0.64273	0.25544
11.27	74	0	16.694	0.00323	2.69E-05	0.00166	0.00195	0.00499	0.06023	0.55	0.03381	0.0387	0.04358	0.10143	0.078805	13.555	0.67414	0.65258	0.18711
11.803	74	0	23.698	0.0038	3.04E-05	0.00197	0.00204	0.0059	0.03836	0.333	0.02038	0.02293	0.02846	0.06115	0.026047	20.983	0.62936	0.63253	0.17886
12.338	74	0	30.722	0.00353	2.76E-05	0.00134	0.00187	0.00401	0.03164	0.274	0.01667	0.02032	0.02436	0.05001	0.019412	21.616	0.65295	0.59868	0.12595
12.941	74	0	38.656	0.00504	4.20E-05	0.0024	0.00277	0.00719	0.03881	0.367	0.01761	0.02584	0.03803	0.05284	0.027063	19.097	0.65997	0.64643	0.17349
13.4	74	0	44.688	0.00582	5.35E-05	0.00237	0.00368	0.0071	0.16015	1.425	0.09731	0.09842	0.10382	0.29193	0.062929	16.784	0.69586	0.62207	0.28288
13.934	74	0	51.701	0.00418	3.24E-05	0.00166	0.00217	0.00499	0.02876	0.284	0.01536	0.01801	0.02278	0.04608	0.034687	20.185	0.64218	0.64381	0.21295
14.467	74	0	58.703	0.00659	5.44E-05	0.00382	0.00354	0.01146	0.05556	0.446	0.03307	0.03243	0.03813	0.0992	0.048773	16.752	0.68208	0.62778	0.22512
15.002	74	0	65.742	0.00353	2.84E-05	0.0019	0.00212	0.0057	0.04356	0.374	0.02473	0.0277	0.03044	0.07418	0.021843	18.204	0.65176	0.64624	0.18301
15.53	74	0	72.681	0.00449	3.40E-05	0.00229	0.00251	0.00686	0.04259	0.386	0.02105	0.0258	0.03439	0.06314	0.024621	19.998	0.64875	0.69637	0.18358
16.062	74	0	79.668	0.0029	2.50E-05	0.00116	0.00168	0.00347	0.03914	0.34	0.02098	0.02478	0.02972	0.06295	0.009853	21.899	0.64596	0.63666	0.15218
17.012	74	0	92.552	0.00398	3.22E-05	0.0017	0.0024	0.00509	0.04337	0.402	0.02268	0.02697	0.0364	0.06803	0.026708	19.867	0.5423	0.68159	0.16814
17.218	74	0	101.72	0.00322	2.62E-05	0.00133	0.00173	0.00398	0.02904	0.245	0.01499	0.01728	0.0234	0.04497	0.008943	21.981	0.63139	0.6297	0.14241
17.353	74	0	107.73	0.01396	0.00011558	0.00822	0.00694	0.02466	0.13827	1.237	0.08104	0.07309	0.08506	0.24311	0.10162	12.933	0.64875	0.71605	0.3331
17.51	74	0	114.7	0.00316	2.64E-05	0.00138	0.00171	0.00414	0.04006	0.362	0.02109	0.02437	0.03116	0.06327	0.02084	21.093	0.652	0.64222	0.16473
17.67	74	0	121.8	0.00404	3.45E-05	0.00177	0.00234	0.00531	0.04277	0.379	0.02296	0.02546	0.03149	0.06888	0.028146	19.948	0.69788	0.65253	0.22867
17.826	74	0	128.76	0.00501	4.14E-05	0.0026	0.0025	0.00781	0.06504	0.581	0.03824	0.03562	0.04138	0.11471	0.032295	20.311	0.58833	0.63102	0.2079
17.983	74	0	135.73	0.00352	2.92E-05	0.00133	0.00202	0.00399	0.03023	0.285	0.01526	0.01862	0.02702	0.04578	0.020834	21.232	0.61074	0.63567	0.12222
18.139	74	0	142.7	0.00427	3.56E-05	0.00154	0.00199	0.00461	0.0322	0.281	0.01502	0.0189	0.03115	0.04505	0.020733	22.462	0.60585	0.61099	0.17133
18.298	74	0	149.78	0.00543	4.46E-05	0.00243	0.00256	0.0073	0.04097	0.372	0.0235	0.02426	0.02821	0.07049	0.022615	20.567	0.5744	0.61341	0.20718
18.454	74	0	156.71	0.00439	3.51E-05	0.0022	0.00242	0.0066	0.05595	0.462	0.03185	0.03509	0.03998	0.09555	0.025109	21.025	0.63233	0.64002	0.20616
18.63	74	0	164.53	0.00419	3.56E-05	0.00152	0.00214	0.00457	0.02923	0.254	0.01358	0.01829	0.02178	0.04075	0.025977	22.516	0.67191	0.6348	0.13414
18.77	74	0	170.76	0.0033	2.68E-05	0.00119	0.00183	0.00358	0.02645	0.239	0.01319	0.01555	0.02192	0.03956	0.014037	23.882	0.50565	0.65434	0.13911
10.737	74	0	9.6889	0.00391	3.42E-05	0.00157	0.00201	0.0047	0.03363	0.304	0.01562	0.01889	0.0269	0.04685	0.024003	19.009	0.69436	0.57865	0.18827
11.27	74	0	16.695	0.00426	3.34E-05	0.002	0.00287	0.00599	0.04051	0.409	0.02271	0.02462	0.03065	0.06813	0.038864	18.816	0.65992	0.65414	0.22814
11.803	74	0	23.699	0.00403	3.15E-05	0.0018	0.00228	0.0054	0.03401	0.303	0.01828	0.02157	0.02671	0.05484	0.033462	19.626	0.6419	0.62918	0.20748
12.338	74	0	30.724	0.00566	4.11E-05	0.00228	0.00227	0.00685	0.03463	0.359	0.01838	0.02068	0.02718	0.05514	0.033033	18.189	0.7055	0.60399	0.19854
12.941	74	0	38.658	0.00329	2.73E-05	0.00149	0.00169	0.00446	0.0509	0.491	0.02642	0.03333	0.04124	0.07925	0.013965	20.341	0.68549	0.65104	0.12804
13.4	74	0	44.69	0.00332	2.73E-05	0.00131	0.00197	0.00394	0.0325	0.291	0.0154	0.01944	0.02621	0.0462	0.032437	17.497	0.67666	0.60602	0.15322
13.934	74	0	51.703	0.00326	2.54E-05	0.00144	0.0019	0.00433	0.08313	0.761	0.04769	0.04973	0.05686	0.14307	0.013607	21.581	0.59119	0.65012	0.1553
14.467	74	0	58.704	0.00418	3.40E-05	0.00156	0.00219	0.00467	0.04509	0.383	0.02223	0.0281	0.03608	0.06668	0.033956	18.115	0.71797	0.64068	0.1713
15.002	74	0	65.743	0.007	5.33E-05	0.00377	0.00438	0.01132	0.06125	0.577	0.03131	0.0383	0.04976	0.09393	0.042636	17.69	0.64214	0.70306	0.30941
15.53	74	0	72.682	0.00514	4.00E-05	0.00259	0.00294	0.00776	0.04359	0.386	0.02392	0.026	0.03189	0.07177	0.028229	19.452	0.69275	0.67494	0.22484
16.062	74	0	79.669	0.00367	3.07E-05	0.00141	0.00225	0.00423	0.03591	0.324	0.01726	0.02391	0.02758	0.05179	0.023978	22.528	0.66589	0.60523	0.12538
17.012	74	0	92.553	0.00314	2.65E-05	0.00142	0.00179	0.00426	0.03007	0.275	0.0146	0.01782	0.02457	0.04379	0.028888	21.404	0.65353	0.61784	0.13389
17.218	74	0	101.72	0.00268	2.19E-05	0.00111	0.00152	0.00333	0.02834	0.24	0.01542	0.01785	0.02168	0.04626	0.00844	22.601	0.66745	0.61332	0.14639
17.353	74	0	107.73	0.00414	3.15E-05	0.0017	0.00214	0.00509	0.0474	0.436	0.02565	0.02982	0.03394	0.07696	0.030855	20.005	0.68154	0.6826	0.38069
17.51	74	0	114.7	0.00431	3.19E-05	0.00204	0.00208	0.00611	0.05399	0.505	0.03126	0.03016	0.0363	0.09378	0.021633	19.976	0.66795	0.61364	0.1574
17.67	74	0	121.8	0.00295	2.40E-05	0.00114	0.0016	0.00343	0.03478	0.322	0.01922	0.02161	0.02704	0.05766	0.020638	20.846	0.66616	0.6292	0.13205
17.826	74	0	128.76	0.00384	3.11E-05	0.0016	0.00204	0.0048	0.04025	0.399	0.02165	0.02336	0.02769	0.06496	0.019929	22.253	0.60613	0.64495	0.14672
17.983	74	0	135.73	0.00352	2.70E-05	0.00127	0.00175	0.00381	0.03456	0.315	0.01719	0.02086	0.0278	0.05157	0.022706	22.81	0.66805	0.62006	0.13904
18.139	74	0	142.7	0.00313	2.71E-05	0.00123	0.00182	0.00369	0.02952	0.255	0.01529	0.01927	0.02455	0.04586	0.014858	19.87	0.6011	0.63027	0.16142
18.298	74	0	149.78	0.00363	2.82E-05	0.00132	0.00171	0.00395	0.03157	0.307	0.01585	0.02044	0.02693	0.04754	0.018978	22.937	0.70738	0.62296	0.12564
18.454	74	0	156.71	0.00605	4.93E-05	0.00306	0.00313	0.00918	0.06297	0.541	0.03578	0.03618	0.04434	0.10735	0.029724	19.742	0.61046	0.62946	0.21307
18.63	74	0	164.53	0.00463	3.94E-05	0.00169	0.00232	0.00508	0.03825	0.382	0.02026	0.02145	0.02907	0.06079	0.024921	19.163	0.68976	0.61419	0.20773
18.77	74	0	170.76	0.00729	5.77E-05	0.00384	0.00346	0.01151	0.07053	0.569	0.04196	0.04113	0.05071	0.12588	0.04508	19.349	0.68037	0.66695	0.25084
10.737	74	0	9.6889	0.0031	2.56E-05	0.00105	0.00169	0.00316	0.02696	0.246	0.01203	0.01641	0.02675	0.03609	0.018408	21.037	0.70068	0.58602	0.1612
11.27	74	0	16.695	0.00455	3.44E-05	0.0024	0.0025	0.00721	0.12495	1.08	0.0731	0.07329	0.08356	0.21929	0.04468	18.473	0.64749	0.63302	0.16979
11.803	74	0	23.699	0.00255	1.81E-05	0.00124	0.00142	0.00372	0.03679	0.303	0.02016	0.02086	0.02657	0.06049	0.010483	22.848	0.68798	0.58908	0.10312
12.338	74	0	30.724	0.00487	3.66E-05	0.00248	0.00255	0.00745	0.04606	0.4	0.02439	0.02723	0.03812	0.07316	0.041895	18.29	0.69588	0.59986	0.17027
12.941	74	0	38.658	0.01399	0.00010127	0.0082	0.00619	0.02461	0.15689	1.357	0.09459	0.07645	0.09552	0.28378	0.11174	11.916	0.65706	0.67187	0.27786
13.4	74	0	44.69	0.00493	3.99E-05	0.00274	0.00268	0.00822	0.10412	0.962	0.06523	0.05568	0.06523	0.19569	0.03169	18.777	0.62928	0.59326	0.16941
13.934	74	0	51.703	0.00517	3.99E-05	0.00262	0.00261	0.00786	0.09722	0.84	0.05816	0.06335	0.06891	0.17449	0.025795	21.061	0.54985	0.63538	0.18293
14.467	74	0	58.704	0.00424	3.14E-05	0.00169	0.00221	0.00507	0.05263	0.471	0.02808	0.03334	0.0379	0.08425	0.049073	15.089	0.65485	0.6578	0.20574
15.002	74	0	65.743	0.00319	2.35E-05	0.00133	0.00176	0.00398	0.04596	0.403	0.02496	0.02852	0.03446	0.07488	0.015588	22.306	0.63729	0.67289	0.15115
15.53	74	0	72.682	0.00488	3.58E-05	0.00243	0.00255	0.00728	0.04943	0.434	0.02712	0.03079	0.03576	0.08135	0.021271	20.207	0.67108	0.6705	0.19191
16.062	74	0	79.669	0.0024	1.81E-05	0.00094	0.00131	0.00283	0.0288	0.247	0.01373	0.01676	0.02476	0.04119	0.011364	22.645	0.70869	0.60409	0.10738
17.012	74	0	92.553	0.00284	2.23E-05	0.00126	0.0017	0.00379	0.02607	0.224	0.01461	0.01585	0.0206	0.04383	0.010242	22.144	0.59353	0.62379	0.14607
17.218	74	0	101.72	0.00779	6.00E-05	0.00452	0.00364	0.01356	0.07595	0.563	0.04574	0.03802	0.04746	0.13722	0.056468	18.844	0.7099	0.61844	0.24718
17.353	74	0	107.73	0.0057	4.23E-05	0.00301	0.00305	0.00904	0.08735	0.655	0.05131	0.04877	0.06183	0.15393	0.027128	19.777	0.6604	0.65781	0.22549
17.51	74	0	114.7	0.00322	2.39E-05	0.00129	0.00169	0.00387	0.04876	0.437	0.02786	0.02914	0.03508	0.08359	0.009054	21.965	0.54958	0.60357	0.16693
17.67	74	0	121.8	0.00492	3.81E-05	0.0022	0.00253	0.0066	0.04941	0.431	0.026	0.03011	0.04118	0.07799	0.02662	20.545	0.60904	0.62867	0.18566
17.826	74	0	128.76	0.00362	2.73E-05	0.00165	0.0022	0.00494	0.06655	0.589	0.03678	0.04102	0.04919	0.11034	0.010743	21.585	0.59443	0.62457	0.18374
17.983	74	0	135.73	0.00358	2.69E-05	0.00136	0.00167	0.00407	0.02861	0.268	0.01416	0.0152	0.02467	0.04247	0.018629	20.885	0.66544	0.61877	0.14376
18.139	74	0	142.7	0.00484	3.86E-05	0.00207	0.00218	0.00622	0.0364	0.373	0.0197	0.01909	0.02824	0.05911	0.017947	21.205	0.62605	0.60507	0.14467
18.298	74	0	149.78	0.0025	1.86E-05	0.00083	0.00137	0.00248	0.03245	0.274	0.01561	0.01884	0.02972	0.04682	0.006753	23.399	0.63968	0.61441	0.14084
18.454	74	0	156.71	0.0044	3.35E-05	0.00181	0.00242	0.00544	0.04616	0.423	0.02328	0.03242	0.04501	0.06984	0.021679	20.876	0.63826	0.62579	0.20561
18.63	74	0	164.53	0.00365	2.94E-05	0.00161	0.00199	0.00484	0.02944	0.293	0.01466	0.01756	0.02729	0.04397	0.01744	22.326	0.57342	0.61372	0.15173
18.77	74	0	170.76	0.00572	4.16E-05	0.00278	0.0031	0.00833	0.05493	0.526	0.03051	0.03276	0.03938	0.09153	0.031791	20.712	0.5568	0.63573	0.19864
10.737	74	0	9.6896	0.00487	4.17E-05	0.00222	0.00241	0.00667	0.03649	0.385	0.01805	0.02199	0.03241	0.05416	0.027043	19.661	0.69333	0.57891	0.16678
11.27	74	0	16.695	0.00253	1.92E-05	0.00113	0.00142	0.0034	0.03012	0.272	0.016	0.01816	0.02273	0.048	0.011587	23.012	0.6477	0.64613	0.11962
11.803	74	0	23.7	0.00322	2.29E-05	0.00149	0.00158	0.00448	0.03149	0.296	0.01773	0.01666	0.02203	0.0532	0.017438	21.461	0.60725	0.60268	0.12558
12.338	74	0	30.724	0.00301	2.23E-05	0.00131	0.0017	0.00393	0.0326	0.284	0.01771	0.0211	0.02456	0.05312	0.01389	20.802	0.62754	0.61237	0.14295
12.941	74	0	38.658	0.00882	6.84E-05	0.00449	0.00402	0.01346	0.06095	0.543	0.03387	0.03769	0.04657	0.1016	0.061898	17.207	0.5945	0.65187	0.33247
13.4	74	0	44.69	0.00521	4.19E-05	0.00278	0.00279	0.00834	0.07364	0.619	0.04207	0.04319	0.04785	0.12621	0.034737	18.233	0.5978	0.59532	0.20674
13.934	74	0	51.703	0.00345	2.66E-05	0.0012	0.00165	0.00361	0.03371	0.307	0.01717	0.02078	0.02674	0.05152	0.016402	22.189	0.56806	0.65509	0.14354
14.467	74	0	58.705	0.0036	2.70E-05	0.0016	0.00183	0.0048	0.04021	0.356	0.01967	0.02442	0.03658	0.05902	0.020962	18.486	0.61659	0.66092	0.14924
15.002	74	0	65.744	0.00725	5.39E-05	0.00431	0.00416	0.01292	0.15257	1.341	0.0852	0.08506	0.10014	0.2556	0.046858	15.387	0.56143	0.69254	0.24978
15.53	74	0	72.683	0.00382	2.69E-05	0.00168	0.00205	0.00504	0.0378	0.374	0.01984	0.02173	0.02788	0.05952	0.016307	20.999	0.6538	0.65895	0.16051
16.062	74	0	79.67	0.00266	2.11E-05	0.00104	0.00152	0.00312	0.02538	0.22	0.01412	0.01556	0.02032	0.04235	0.007253	22.915	0.61267	0.60594	0.12796
17.012	74	0	92.554	0.00368	2.77E-05	0.00136	0.00183	0.00408	0.03702	0.336	0.01632	0.02068	0.0293	0.04895	0.016298	22.111	0.68709	0.63478	0.15484
17.218	74	0	101.72	0.00335	2.49E-05	0.00148	0.00192	0.00445	0.03373	0.301	0.01761	0.02097	0.02873	0.05282	0.012566	22.254	0.63142	0.60447	0.18209
17.353	74	0	107.73	0.00619	4.34E-05	0.00316	0.00316	0.00949	0.07038	0.638	0.03903	0.05003	0.06156	0.11709	0.032916	20.296	0.5086	0.67701	0.27641
17.51	74	0	114.7	0.00441	3.36E-05	0.00178	0.00237	0.00533	0.0544	0.509	0.03028	0.03309	0.04261	0.09084	0.024059	20.675	0.62276	0.61029	0.18201
17.67	74	0	121.8	0.00664	4.72E-05	0.0039	0.00329	0.0117	0.05018	0.424	0.02907	0.02597	0.03375	0.08721	0.041069	20.958	0.63182	0.62725	0.16694
17.826	74	0	128.76	0.00634	4.74E-05	0.0024	0.00214	0.0072	0.04906	0.447	0.02695	0.03496	0.03994	0.08085	0.032759	19.679	0.55716	0.6694	0.28118
17.983	74	0	135.73	0.00429	3.12E-05	0.00157	0.00177	0.00471	0.03658	0.322	0.02043	0.0185	0.02823	0.06129	0.031349	19.05	0.61864	0.59789	0.1698
18.139	74	0	142.7	0.00585	4.60E-05	0.00244	0.00253	0.00731	0.0282	0.255	0.01427	0.01511	0.02198	0.04281	0.020017	22.764	0.6403	0.60553	0.31296
18.298	74	0	149.78	0.0046	3.46E-05	0.00241	0.00245	0.00724	0.05185	0.499	0.02992	0.0305	0.03678	0.08977	0.029083	22.051	0.55628	0.61026	0.2117
18.454	74	0	156.71	0.00513	3.85E-05	0.00245	0.00288	0.00736	0.04949	0.448	0.02583	0.03148	0.03734	0.0775	0.029953	21.455	0.65666	0.62383	0.21051
18.63	74	0	164.53	0.00414	3.04E-05	0.0017	0.00199	0.00511	0.03446	0.306	0.01795	0.01769	0.02838	0.05385	0.017026	21.18	0.58206	0.63748	0.19278
18.77	74	0	170.76	0.0045	3.32E-05	0.00219	0.00239	0.00656	0.05263	0.459	0.03075	0.02825	0.04384	0.09224	0.019188	20.506	0.60966	0.62358	0.19125
31	75	0	58.579	0.00601	5.69E-05	0.00261	0.00335	0.00782	0.03827	0.336	0.02123	0.02405	0.0278	0.06369	0.037903	16.656	0.57854	0.67408	0.26463
31	75	0	63.388	0.00501	3.65E-05	0.00195	0.00228	0.00586	0.03802	0.389	0.01906	0.02362	0.03522	0.05719	0.034563	19.904	0.62408	0.63157	0.30551
31	75	0	70.403	0.00563	4.40E-05	0.00296	0.00344	0.00889	0.02899	0.26	0.01639	0.01781	0.02185	0.04917	0.018042	20.201	0.4969	0.64062	0.23876
31	75	0	77.368	0.00604	5.73E-05	0.00296	0.00368	0.00887	0.0495	0.425	0.02854	0.03031	0.03495	0.08563	0.036403	18.219	0.55669	0.66369	0.30258
31	75	0	84.389	0.00352	2.92E-05	0.00138	0.00195	0.00414	0.03123	0.272	0.01681	0.01884	0.02441	0.05043	0.013082	21.921	0.59769	0.60524	0.18497
31	75	0	91.394	0.00646	4.32E-05	0.00269	0.00359	0.00807	0.03116	0.484	0.01612	0.02092	0.02936	0.04835	0.047765	19.59	0.6784	0.61026	0.33498
31.232	75	0	98.408	0.00532	4.40E-05	0.00241	0.00301	0.00723	0.04507	0.396	0.02421	0.02909	0.0374	0.07262	0.029844	18.754	0.54715	0.67058	0.21616
31.484	75	0	105.39	0.00733	6.08E-05	0.00306	0.00443	0.00918	0.03702	0.352	0.01947	0.02087	0.02897	0.0584	0.031622	19.464	0.54962	0.69661	0.28306
31.737	75	0	112.38	0.00615	5.13E-05	0.00272	0.00319	0.00816	0.0327	0.28	0.01671	0.01973	0.02701	0.05013	0.031733	20.234	0.61343	0.62785	0.24713
31.989	75	0	119.37	0.00363	2.98E-05	0.00156	0.002	0.00468	0.02687	0.334	0.01444	0.01629	0.02341	0.04332	0.036727	22.074	0.51323	0.62163	0.24016
32.244	75	0	126.42	0.00344	2.61E-05	0.0017	0.00196	0.00511	0.0325	0.282	0.01822	0.02146	0.02786	0.05466	0.013685	20.022	0.55771	0.65462	0.20487
32.495	75	0	133.37	0.00389	3.47E-05	0.00161	0.00223	0.00484	0.03239	0.281	0.01778	0.02038	0.0274	0.05333	0.013706	20.384	0.53808	0.69526	0.21352
32.749	75	0	140.39	0.00479	4.51E-05	0.00172	0.00253	0.00516	0.0289	0.251	0.01566	0.0187	0.02561	0.04699	0.016825	20.629	0.57524	0.64575	0.20547
33	75	0	147.34	0.00624	5.28E-05	0.00305	0.00338	0.00915	0.04101	0.459	0.02195	0.0249	0.04178	0.06586	0.046025	18.102	0.64043	0.64359	0.31221
33.253	75	0	154.32	0.00479	3.97E-05	0.00207	0.00241	0.0062	0.03027	0.295	0.01709	0.01831	0.02619	0.05126	0.033974	21.223	0.45862	0.64828	0.27415
33.503	75	0	161.24	0.00607	5.25E-05	0.0031	0.003	0.0093	0.03651	0.33	0.01968	0.01968	0.02656	0.05903	0.039119	20.813	0.54539	0.70789	0.24148
33.761	75	0	168.39	0.0073	5.61E-05	0.00381	0.00412	0.01142	0.04487	0.403	0.02501	0.02568	0.03027	0.07503	0.061746	19.367	0.58626	0.67434	0.26485
31	75	0	14.376	0.00728	6.75E-05	0.00364	0.00338	0.01091	0.02815	0.235	0.01444	0.01758	0.02607	0.04332	0.039571	20.528	0.5841	0.66392	0.29833
31	75	0	21.336	0.00569	5.74E-05	0.00247	0.00364	0.00742	0.01899	0.179	0.00788	0.01075	0.01691	0.02363	0.026937	22.914	0.60703	0.66547	0.21658
31	75	0	28.378	0.00438	3.76E-05	0.00188	0.00256	0.00564	0.02842	0.246	0.01372	0.01615	0.02907	0.04116	0.017854	19.837	0.64039	0.6321	0.23871
31	75	0	35.415	0.00455	4.15E-05	0.00195	0.00245	0.00584	0.03253	0.281	0.0175	0.02114	0.02986	0.0525	0.01703	19.376	0.57111	0.67175	0.20852
31	75	0	42.406	0.00441	3.81E-05	0.00207	0.00256	0.0062	0.02268	0.199	0.01223	0.0135	0.01768	0.0367	0.018207	19.246	0.53573	0.66352	0.22595
31	75	0	49.363	0.00881	7.04E-05	0.00414	0.00425	0.01243	0.09788	0.905	0.05721	0.05626	0.06725	0.17164	0.067801	15.558	0.6727	0.62664	0.31115
31	75	0	56.428	0.00493	4.06E-05	0.00214	0.00278	0.00643	0.04291	0.368	0.02268	0.02892	0.04076	0.06803	0.026969	17.304	0.59679	0.66536	0.2397
31	75	0	58.56	0.01023	0.00010601	0.00511	0.00549	0.01533	0.04292	0.375	0.02382	0.02384	0.03697	0.07146	0.054663	16.25	0.70952	0.68951	0.41998
31	75	0	7.3597	0.00645	5.13E-05	0.00244	0.00375	0.00733	0.03279	0.299	0.01862	0.01927	0.0231	0.05586	0.038269	18.811	0.55403	0.66015	0.24177
31	75	0	58.58	0.00502	5.00E-05	0.00258	0.00311	0.00773	0.05189	0.453	0.02843	0.03268	0.04262	0.08528	0.018117	19.739	0.53215	0.65601	0.24739
31	75	0	63.389	0.00438	3.50E-05	0.00177	0.00207	0.0053	0.02594	0.223	0.01395	0.01497	0.01888	0.04184	0.018536	22.587	0.59059	0.62526	0.16798
31	75	0	70.403	0.00289	2.28E-05	0.0012	0.00156	0.00361	0.02928	0.258	0.01612	0.01946	0.02312	0.04836	0.009248	23.594	0.50495	0.631	0.13955
31	75	0	77.369	0.00357	3.16E-05	0.0017	0.0021	0.0051	0.04525	0.395	0.02499	0.02878	0.03609	0.07496	0.014957	19.892	0.53131	0.61665	0.17867
31	75	0	84.39	0.00823	6.45E-05	0.00372	0.00477	0.01115	0.06197	0.508	0.03405	0.03638	0.04425	0.10214	0.044917	20.011	0.66927	0.60701	0.32682
31	75	0	91.394	0.00409	3.52E-05	0.00214	0.00251	0.00641	0.03391	0.294	0.01787	0.02178	0.02878	0.0536	0.013739	21.065	0.55538	0.63908	0.21083
31.232	75	0	98.408	0.00762	6.12E-05	0.00387	0.00355	0.01161	0.03816	0.337	0.02116	0.02325	0.02863	0.06348	0.028745	18.773	0.67042	0.63364	0.22558
31.484	75	0	105.39	0.00373	3.13E-05	0.00193	0.00199	0.00578	0.02538	0.215	0.01457	0.01524	0.0181	0.04371	0.009395	22.11	0.4006	0.64611	0.16363
31.737	75	0	112.38	0.0037	3.00E-05	0.00189	0.00207	0.00568	0.03631	0.319	0.02087	0.0212	0.02722	0.06261	0.008833	22.979	0.49351	0.62197	0.16473
31.989	75	0	119.38	0.00649	5.69E-05	0.00324	0.00338	0.00971	0.02332	0.199	0.01163	0.01383	0.01988	0.03489	0.048718	21.063	0.62798	0.60544	0.28517
32.244	75	0	126.42	0.00315	2.46E-05	0.00156	0.00175	0.00468	0.02732	0.238	0.0156	0.01721	0.01955	0.0468	0.008296	22.691	0.46485	0.67667	0.16846
32.495	75	0	133.37	0.00457	4.04E-05	0.00198	0.00253	0.00594	0.03443	0.3	0.01814	0.02062	0.0281	0.05442	0.013326	20.916	0.58642	0.67043	0.22211
32.749	75	0	140.39	0.00565	5.05E-05	0.00235	0.00318	0.00705	0.02324	0.333	0.00946	0.0122	0.02062	0.02837	0.030024	20.528	0.58402	0.63299	0.31832
33	75	0	147.34	0.00517	4.88E-05	0.00174	0.00234	0.00522	0.02612	0.229	0.01367	0.01699	0.02192	0.04101	0.016855	22.41	0.51352	0.64691	0.17872
33.253	75	0	154.32	0.00492	4.30E-05	0.00238	0.003	0.00713	0.02969	0.255	0.0163	0.01756	0.02231	0.0489	0.014043	20.396	0.54337	0.63823	0.23548
33.503	75	0	161.24	0.00375	3.39E-05	0.00155	0.0021	0.00466	0.02349	0.205	0.01277	0.01571	0.01819	0.03831	0.009993	21.982	0.52308	0.6715	0.17284
33.761	75	0	168.39	0.00526	3.82E-05	0.00217	0.00196	0.0065	0.02331	0.386	0.01164	0.0137	0.01913	0.03491	0.038118	22.367	0.53705	0.65208	0.28787
31	75	0	14.376	0.00289	2.63E-05	0.00124	0.00166	0.00371	0.02928	0.245	0.01664	0.01923	0.02332	0.04993	0.008739	23.168	0.5817	0.65362	0.14328
31	75	0	21.337	0.00556	5.77E-05	0.00244	0.00334	0.00732	0.0293	0.254	0.0157	0.01731	0.02112	0.04709	0.024557	18.998	0.57254	0.64338	0.26788
31	75	0	28.378	0.00525	4.54E-05	0.00245	0.00289	0.00736	0.02539	0.219	0.01104	0.01507	0.02422	0.03313	0.030435	21.072	0.54838	0.61462	0.21735
31	75	0	35.416	0.00508	4.47E-05	0.00258	0.00313	0.00773	0.05924	0.508	0.03266	0.03862	0.04946	0.09798	0.020654	19.142	0.56198	0.65949	0.25938
31	75	0	42.406	0.00371	3.14E-05	0.00147	0.00207	0.0044	0.03158	0.274	0.01667	0.01827	0.02287	0.05	0.013616	20.865	0.52891	0.62243	0.20829
31	75	0	49.363	0.00277	2.23E-05	0.00123	0.00144	0.00369	0.02023	0.174	0.01064	0.01121	0.01572	0.03191	0.009016	23.795	0.64247	0.60651	0.097894
31	75	0	56.429	0.00396	3.50E-05	0.00173	0.00254	0.0052	0.04375	0.379	0.02507	0.02696	0.0314	0.0752	0.015659	20.817	0.46495	0.66061	0.23759
31	75	0	58.561	0.00951	9.81E-05	0.00548	0.00565	0.01645	0.03924	0.36	0.02069	0.02573	0.03189	0.06207	0.041471	15.779	0.67535	0.68301	0.36369
31	75	0	7.3604	0.00367	2.98E-05	0.00162	0.00191	0.00487	0.0185	0.164	0.00873	0.01029	0.01488	0.02619	0.010239	22.875	0.55569	0.64793	0.15291
31	75	0	58.58	0.00384	3.80E-05	0.00173	0.00236	0.0052	0.03119	0.27	0.01818	0.01834	0.02013	0.05455	0.015531	20.504	0.53498	0.66374	0.19993
31	75	0	63.39	0.0027	2.08E-05	0.00125	0.00159	0.00374	0.02945	0.25	0.01617	0.01781	0.02312	0.04851	0.006885	24.87	0.60171	0.61322	0.15274
31	75	0	70.404	0.00391	3.10E-05	0.00166	0.00214	0.00498	0.03286	0.289	0.01775	0.01959	0.02342	0.05324	0.01247	22.004	0.54292	0.64485	0.19344
31	75	0	77.369	0.00661	5.88E-05	0.00346	0.00287	0.01037	0.03651	0.313	0.01931	0.0234	0.03102	0.05793	0.036611	19.786	0.67931	0.62654	0.23749
31	75	0	84.39	0.00504	3.88E-05	0.00216	0.00231	0.00648	0.02542	0.261	0.01176	0.01561	0.02033	0.03529	0.036471	21.273	0.71433	0.59594	0.33664
31	75	0	91.394	0.00726	6.30E-05	0.00391	0.004	0.01173	0.05844	0.507	0.0319	0.03497	0.03917	0.09569	0.055507	18.605	0.61917	0.62561	0.28853
31.232	75	0	98.408	0.00374	2.87E-05	0.00159	0.0018	0.00477	0.03201	0.308	0.01911	0.01839	0.02485	0.05734	0.019405	21.47	0.60021	0.59893	0.22731
31.484	75	0	105.4	0.00407	3.40E-05	0.00209	0.00241	0.00626	0.03951	0.342	0.02201	0.02399	0.03102	0.06604	0.013904	20.418	0.5749	0.66188	0.21037
31.737	75	0	112.38	0.00317	2.46E-05	0.00145	0.00184	0.00436	0.02659	0.231	0.01439	0.01682	0.01962	0.04317	0.007141	23.359	0.61357	0.59545	0.16693
31.989	75	0	119.38	0.0063	5.88E-05	0.00334	0.00335	0.01003	0.02542	0.233	0.01303	0.01549	0.02238	0.03909	0.028383	20.153	0.65375	0.59971	0.25825
32.244	75	0	126.42	0.00646	4.82E-05	0.00276	0.00224	0.00829	0.04218	0.376	0.02355	0.02636	0.02973	0.07065	0.022691	21.634	0.55923	0.64847	0.23399
32.495	75	0	133.37	0.00649	5.32E-05	0.00267	0.0035	0.008	0.03866	0.432	0.02013	0.02351	0.03163	0.06038	0.063533	17.795	0.60408	0.64586	0.36048
32.749	75	0	140.39	0.00507	4.66E-05	0.00193	0.00222	0.00578	0.02254	0.208	0.00915	0.01257	0.01892	0.02745	0.023962	23.62	0.64014	0.61074	0.23842
33	75	0	147.34	0.00717	6.68E-05	0.00399	0.00354	0.01196	0.08098	0.681	0.04769	0.04487	0.0558	0.14306	0.031301	19.192	0.62111	0.63868	0.25691
33.253	75	0	154.33	0.00577	5.12E-05	0.00264	0.00282	0.00791	0.02643	0.254	0.01408	0.01442	0.01802	0.04224	0.019787	22.279	0.53941	0.5958	0.23457
33.503	75	0	161.24	0.0033	2.88E-05	0.00137	0.00193	0.00412	0.03187	0.268	0.01776	0.01956	0.02658	0.05329	0.010559	21.947	0.62085	0.66886	0.17484
33.761	75	0	168.39	0.00347	2.73E-05	0.00126	0.00162	0.00378	0.0239	0.224	0.01203	0.01467	0.02171	0.0361	0.012264	23.142	0.58957	0.61373	0.17409
31	75	0	14.377	0.0052	4.60E-05	0.00245	0.0024	0.00735	0.04307	0.378	0.02447	0.02745	0.03097	0.0734	0.019187	21.134	0.56004	0.63083	0.19821
31	75	0	21.337	0.00339	3.15E-05	0.00097	0.00175	0.00291	0.04294	0.404	0.02092	0.02464	0.04355	0.06276	0.015633	22.315	0.64445	0.61138	0.14247
31	75	0	28.379	0.00589	5.32E-05	0.00295	0.00271	0.00884	0.02699	0.246	0.01447	0.01689	0.01953	0.0434	0.029354	20.145	0.59143	0.60756	0.27237
31	75	0	35.416	0.00426	3.76E-05	0.00184	0.00224	0.00552	0.02913	0.244	0.01649	0.01757	0.02006	0.04947	0.015422	20.893	0.58411	0.66542	0.19139
31	75	0	42.406	0.00433	3.80E-05	0.00173	0.00236	0.0052	0.04209	0.363	0.0234	0.02674	0.03212	0.0702	0.018209	20.875	0.51312	0.62564	0.20147
31	75	0	49.364	0.00409	3.43E-05	0.00194	0.00226	0.00583	0.03864	0.325	0.02109	0.02378	0.02959	0.06327	0.020287	20.36	0.63073	0.5998	0.14198
31	75	0	56.429	0.00332	2.81E-05	0.00138	0.00187	0.00415	0.03271	0.281	0.01765	0.02025	0.0265	0.05296	0.011278	21.556	0.5892	0.61544	0.18883
31	75	0	58.561	0.0045	4.49E-05	0.00151	0.00277	0.00453	0.06258	0.551	0.0303	0.03889	0.06282	0.09089	0.024861	18.138	0.57407	0.67395	0.27477
31	75	0	7.3604	0.00383	3.00E-05	0.00172	0.002	0.00517	0.03427	0.299	0.01992	0.01894	0.02354	0.05977	0.013929	20.639	0.59684	0.61559	0.17986
31	75	0	58.582	0.0046	3.96E-05	0.00175	0.00254	0.00526	0.04059	0.411	0.02152	0.02549	0.03318	0.06457	0.035301	19.379	0.54446	0.67422	0.29137
31	75	0	63.391	0.00618	5.25E-05	0.003	0.00356	0.00899	0.03314	0.295	0.01744	0.02058	0.02608	0.05232	0.021771	19.842	0.56419	0.6632	0.26354
31	75	0	70.406	0.00291	2.46E-05	0.0015	0.00161	0.0045	0.04402	0.381	0.02521	0.02696	0.03222	0.07563	0.011641	21.683	0.40546	0.67642	0.12731
31	75	0	77.371	0.00604	5.42E-05	0.00337	0.00335	0.01011	0.06339	0.562	0.03556	0.03888	0.04316	0.10668	0.024247	18.464	0.50434	0.65098	0.25078
31	75	0	84.392	0.004	3.65E-05	0.0014	0.00217	0.0042	0.03733	0.331	0.02062	0.02228	0.03108	0.06186	0.010905	21.626	0.6047	0.63421	0.17324
31	75	0	91.397	0.00746	6.81E-05	0.00312	0.00338	0.00936	0.05324	0.466	0.02952	0.03317	0.03812	0.08857	0.051759	17.601	0.75343	0.65291	0.31493
31.232	75	0	98.41	0.00359	3.01E-05	0.00153	0.00213	0.0046	0.02837	0.245	0.01566	0.01673	0.02488	0.04697	0.010957	21.877	0.51779	0.6469	0.1919
31.484	75	0	105.4	0.00444	3.99E-05	0.00209	0.00253	0.00628	0.03273	0.284	0.01824	0.02105	0.02503	0.05473	0.013188	20.644	0.55339	0.68282	0.21891
31.737	75	0	112.38	0.00866	7.53E-05	0.0044	0.00454	0.01319	0.02701	0.272	0.0136	0.01623	0.0231	0.04081	0.048323	18.904	0.60362	0.63474	0.27184
31.99	75	0	119.38	0.00513	5.01E-05	0.00245	0.00318	0.00736	0.02961	0.259	0.01616	0.02084	0.02368	0.04848	0.014968	20.573	0.58723	0.66209	0.24213
32.244	75	0	126.42	0.0039	3.10E-05	0.00197	0.00232	0.00592	0.03661	0.318	0.02049	0.02445	0.02657	0.06148	0.0205	20.917	0.50918	0.67314	0.15916
32.495	75	0	133.38	0.00507	4.41E-05	0.00232	0.00243	0.00695	0.03263	0.311	0.01744	0.01975	0.02545	0.05233	0.028964	20.44	0.56095	0.69569	0.22327
32.749	75	0	140.39	0.00419	3.77E-05	0.00212	0.00243	0.00637	0.03255	0.289	0.01731	0.0198	0.02787	0.05192	0.011488	21.456	0.44057	0.65653	0.18992
33	75	0	147.34	0.00819	8.68E-05	0.00396	0.00323	0.01188	0.03931	0.336	0.02215	0.02389	0.02959	0.06644	0.03285	18.611	0.63427	0.68567	0.2927
33.253	75	0	154.33	0.00427	3.94E-05	0.00207	0.00253	0.00621	0.03258	0.284	0.01908	0.01959	0.02285	0.05724	0.019329	19.1	0.53465	0.67087	0.1946
33.503	75	0	161.24	0.00849	7.65E-05	0.00408	0.00469	0.01225	0.04414	0.521	0.02179	0.02762	0.04105	0.06536	0.041777	18.45	0.60045	0.71018	0.32351
33.761	75	0	168.39	0.00341	2.84E-05	0.00142	0.00191	0.00426	0.03232	0.282	0.01748	0.02096	0.02515	0.05245	0.009274	22.211	0.45217	0.65516	0.18206
31	75	0	14.378	0.0033	3.13E-05	0.00126	0.00197	0.00379	0.02353	0.201	0.01238	0.01536	0.01722	0.03714	0.009947	21.711	0.57874	0.6662	0.17445
31	75	0	21.339	0.01169	0.00010801	0.00468	0.00623	0.01403	0.0758	0.747	0.03676	0.04562	0.05751	0.11027	0.15028	14.365	0.67608	0.6361	0.41938
31	75	0	28.381	0.00385	3.71E-05	0.00165	0.00246	0.00494	0.03332	0.295	0.01711	0.0204	0.02508	0.05132	0.015928	20.381	0.63969	0.61935	0.21869
31	75	0	35.417	0.00371	3.05E-05	0.00195	0.00224	0.00586	0.0436	0.357	0.0243	0.02437	0.03122	0.0729	0.012226	21.745	0.59491	0.62911	0.18793
31	75	0	42.408	0.00586	5.14E-05	0.0023	0.00303	0.00691	0.05357	0.46	0.02707	0.03275	0.04134	0.08121	0.027158	19.379	0.62033	0.64602	0.23463
31	75	0	49.365	0.00541	5.11E-05	0.0021	0.00288	0.00629	0.06073	0.536	0.02735	0.03465	0.04063	0.08205	0.066083	16.168	0.96608	0.76187	0.3119
31	75	0	56.431	0.00311	2.59E-05	0.0014	0.00183	0.00421	0.03518	0.306	0.01957	0.02175	0.02513	0.0587	0.012656	20.793	0.57367	0.63975	0.16045
31	75	0	58.563	0.00431	4.25E-05	0.00216	0.00253	0.00649	0.04369	0.373	0.02493	0.02816	0.03427	0.07479	0.020964	18.563	0.62673	0.6576	0.22771
31	75	0	7.3618	0.00305	2.43E-05	0.00141	0.00189	0.00422	0.03933	0.341	0.02144	0.02525	0.03355	0.06431	0.018751	21.142	0.55268	0.66893	0.23416
31	75	0	58.582	0.00357	2.94E-05	0.0016	0.00202	0.00479	0.02697	0.236	0.01441	0.01749	0.02095	0.04323	0.010841	21.812	0.46259	0.6392	0.17804
31	75	0	63.391	0.00587	4.32E-05	0.00259	0.00296	0.00778	0.0298	0.343	0.01591	0.01763	0.0239	0.04774	0.028664	22.131	0.56379	0.60815	0.2453
31	75	0	70.406	0.0036	2.99E-05	0.00191	0.00203	0.00573	0.04644	0.404	0.02587	0.02968	0.03534	0.07761	0.012249	21.985	0.56884	0.63479	0.13399
31	75	0	77.371	0.00454	3.87E-05	0.0022	0.0023	0.0066	0.03406	0.299	0.0187	0.02285	0.0265	0.05611	0.018329	20.484	0.65126	0.62226	0.19747
31	75	0	84.392	0.00354	2.84E-05	0.00168	0.00219	0.00503	0.03045	0.281	0.01594	0.01871	0.02651	0.04781	0.013284	22.085	0.56362	0.5966	0.18287
31	75	0	91.397	0.00398	3.18E-05	0.00171	0.00198	0.00512	0.0439	0.394	0.02585	0.02561	0.03255	0.07755	0.018117	20.502	0.64019	0.60485	0.18814
31.232	75	0	98.41	0.00389	3.23E-05	0.00178	0.00235	0.00533	0.035	0.315	0.01875	0.02159	0.02972	0.05626	0.014572	20.596	0.60077	0.63549	0.17484
31.484	75	0	105.4	0.00379	3.06E-05	0.00181	0.00214	0.00544	0.03243	0.282	0.01877	0.01857	0.02179	0.05632	0.011873	21.212	0.52484	0.67701	0.15959
31.737	75	0	112.38	0.00349	2.84E-05	0.00176	0.00203	0.00528	0.04314	0.369	0.02576	0.02482	0.03015	0.07728	0.009865	22.469	0.51514	0.62072	0.17324
31.99	75	0	119.38	0.00827	7.95E-05	0.00455	0.00413	0.01364	0.03515	0.33	0.01857	0.0205	0.02868	0.05571	0.045038	17.51	0.6312	0.62116	0.31457
32.244	75	0	126.42	0.00346	2.66E-05	0.00162	0.00196	0.00485	0.05376	0.473	0.02949	0.03621	0.04172	0.08846	0.012451	21.252	0.55118	0.65209	0.15928
32.495	75	0	133.38	0.00517	4.51E-05	0.00215	0.00294	0.00646	0.03536	0.356	0.01827	0.02251	0.03302	0.05481	0.030906	19.145	0.61411	0.66574	0.30939
32.749	75	0	140.39	0.00594	5.36E-05	0.00239	0.00309	0.00718	0.04507	0.463	0.02379	0.02861	0.04036	0.07137	0.029485	19.328	0.56652	0.64473	0.27975
33	75	0	147.34	0.00353	3.39E-05	0.00163	0.00217	0.00488	0.03131	0.274	0.01731	0.01949	0.02546	0.05194	0.009337	22.321	0.59887	0.64504	0.1759
33.253	75	0	154.33	0.0061	5.60E-05	0.00284	0.00327	0.00853	0.03534	0.307	0.01818	0.02177	0.02831	0.05453	0.028923	19.431	0.62136	0.63049	0.2728
33.503	75	0	161.24	0.00724	6.59E-05	0.00324	0.00397	0.00971	0.02928	0.329	0.01555	0.01826	0.02356	0.04664	0.033351	19.496	0.63445	0.66462	0.33074
33.761	75	0	168.39	0.00618	4.95E-05	0.00275	0.00272	0.00825	0.03257	0.349	0.01626	0.01955	0.02602	0.04879	0.018635	22.074	0.51767	0.63478	0.22267
31	75	0	14.379	0.0029	2.36E-05	0.00122	0.0015	0.00367	0.03073	0.259	0.01588	0.01975	0.0246	0.04764	0.007934	24.492	0.55517	0.60845	0.10498
31	75	0	21.339	0.00451	4.54E-05	0.00163	0.00255	0.00488	0.03939	0.341	0.01984	0.02625	0.03428	0.05951	0.016452	20.358	0.5734	0.63045	0.22183
31	75	0	28.381	0.00383	3.08E-05	0.00182	0.00208	0.00545	0.03529	0.344	0.01818	0.02064	0.0241	0.05453	0.015519	21.277	0.60198	0.61154	0.25063
31	75	0	35.418	0.00271	2.09E-05	0.00125	0.00162	0.00374	0.02913	0.254	0.01581	0.01816	0.02337	0.04743	0.005903	24.292	0.52778	0.59432	0.14466
31	75	0	42.408	0.00448	3.92E-05	0.00181	0.00256	0.00544	0.03736	0.329	0.01905	0.0246	0.03407	0.05716	0.016422	20.684	0.57267	0.6121	0.23638
31	75	0	49.365	0.00398	3.65E-05	0.00169	0.00225	0.00508	0.05669	0.5	0.03279	0.03479	0.04057	0.09837	0.020245	19.916	0.57189	0.62222	0.2421
31	75	0	56.431	0.00498	4.14E-05	0.0024	0.00268	0.00719	0.04986	0.479	0.02645	0.03011	0.04002	0.07934	0.020137	20.324	0.57785	0.62542	0.20346
31	75	0	58.563	0.00518	4.83E-05	0.00223	0.00295	0.00669	0.03641	0.317	0.01984	0.02259	0.02642	0.05951	0.027234	18.607	0.6877	0.66356	0.23393
31	75	0	7.3625	0.00397	3.25E-05	0.00176	0.00194	0.00528	0.02709	0.246	0.01372	0.01549	0.02316	0.04115	0.015902	21.993	0.61539	0.63644	0.18907
31	75	0	58.583	0.005	4.05E-05	0.00266	0.00304	0.00798	0.05916	0.522	0.03352	0.03747	0.04039	0.10055	0.023069	18.358	0.6228	0.62355	0.23806
31	75	0	63.392	0.01334	0.00010587	0.00671	0.00552	0.02013	0.03995	0.403	0.02173	0.02268	0.02736	0.06519	0.091311	17.063	0.73539	0.57127	0.3463
31	75	0	70.406	0.00379	2.98E-05	0.00177	0.00213	0.00532	0.05506	0.481	0.03007	0.03396	0.04552	0.09022	0.017451	19.989	0.67491	0.60897	0.18395
31	75	0	77.372	0.00431	3.58E-05	0.00206	0.00253	0.00618	0.03389	0.303	0.01785	0.02064	0.02837	0.05355	0.016607	20.207	0.60716	0.5934	0.22177
31	75	0	84.392	0.00545	4.27E-05	0.00214	0.00212	0.00643	0.02454	0.238	0.01218	0.01526	0.0245	0.03655	0.02316	22.25	0.58704	0.57724	0.24385
31	75	0	91.397	0.00389	2.82E-05	0.00165	0.00146	0.00495	0.02563	0.255	0.01318	0.01678	0.02243	0.03954	0.017115	23.068	0.49297	0.589	0.19743
31.232	75	0	98.41	0.00406	2.95E-05	0.0018	0.00187	0.00539	0.04118	0.318	0.02351	0.02188	0.02914	0.07053	0.019104	22.714	0.63302	0.59998	0.17986
31.484	75	0	105.4	0.00613	5.21E-05	0.00298	0.00367	0.00895	0.04456	0.39	0.02455	0.02998	0.03225	0.07365	0.023328	18.455	0.53382	0.65773	0.27903
31.737	75	0	112.38	0.00279	2.17E-05	0.00118	0.00155	0.00355	0.02295	0.203	0.01216	0.01422	0.01746	0.03648	0.005865	24.837	0.55786	0.59777	0.143
31.99	75	0	119.38	0.00454	3.79E-05	0.00234	0.00245	0.00703	0.03849	0.325	0.0217	0.02309	0.03002	0.06509	0.017488	21.485	0.6114	0.61087	0.19224
32.244	75	0	126.42	0.00618	4.57E-05	0.00299	0.00262	0.00896	0.04964	0.454	0.02878	0.03094	0.03492	0.08635	0.018973	20.628	0.52792	0.64142	0.21108
32.496	75	0	133.38	0.00234	1.81E-05	0.00085	0.00132	0.00254	0.02991	0.257	0.01677	0.0185	0.02593	0.0503	0.004595	25.425	0.45514	0.61676	0.14934
32.749	75	0	140.4	0.00564	5.03E-05	0.00257	0.00349	0.00771	0.04356	0.431	0.02267	0.02535	0.03833	0.068	0.02533	19.936	0.60094	0.6255	0.31382
33	75	0	147.34	0.00431	3.86E-05	0.00206	0.00235	0.00619	0.0255	0.234	0.01315	0.01612	0.02081	0.03946	0.014307	23.438	0.54886	0.64231	0.19985
33.253	75	0	154.33	0.00561	4.84E-05	0.00245	0.00321	0.00734	0.04625	0.431	0.0253	0.03002	0.03682	0.0759	0.030215	19.304	0.62817	0.60686	0.2152
33.503	75	0	161.25	0.00476	4.18E-05	0.00232	0.00231	0.00697	0.0373	0.332	0.01855	0.02328	0.03074	0.05565	0.017577	22.532	0.51472	0.65168	0.25312
33.761	75	0	168.39	0.00729	5.98E-05	0.00299	0.0032	0.00898	0.04791	0.467	0.02714	0.0297	0.03502	0.08141	0.025858	18.791	0.65833	0.62977	0.2789
31	75	0	14.379	0.00348	2.63E-05	0.00131	0.00152	0.00392	0.03754	0.333	0.02028	0.02396	0.03273	0.06085	0.023596	21.612	0.59648	0.60301	0.35652
31	75	0	21.34	0.00298	2.76E-05	0.00096	0.00163	0.00288	0.03014	0.254	0.01653	0.01863	0.02476	0.04959	0.008887	22.615	0.65259	0.60573	0.1444
31	75	0	28.381	0.00407	3.33E-05	0.0017	0.00195	0.00509	0.02658	0.236	0.01443	0.01686	0.02467	0.0433	0.021173	21.22	0.55012	0.58637	0.20437
31	75	0	35.418	0.00243	1.84E-05	0.00106	0.00144	0.00318	0.03381	0.295	0.01886	0.02287	0.0259	0.05658	0.005863	24.265	0.52204	0.59419	0.13399
31	75	0	42.408	0.00322	2.63E-05	0.00127	0.00166	0.0038	0.03337	0.29	0.01744	0.02147	0.02914	0.05232	0.010772	22.548	0.55207	0.59293	0.16558
31	75	0	49.366	0.00364	3.05E-05	0.00141	0.00181	0.00423	0.03389	0.305	0.01714	0.01974	0.02983	0.05142	0.01779	21.616	0.6563	0.58938	0.13244
31	75	0	56.432	0.00254	2.03E-05	0.00106	0.00152	0.00317	0.03258	0.284	0.01879	0.01972	0.02404	0.05637	0.0098	21.638	0.49302	0.60726	0.17408
31	75	0	58.564	0.00439	3.98E-05	0.00176	0.00264	0.00528	0.03298	0.269	0.01802	0.01976	0.02465	0.05406	0.014584	20.781	0.64777	0.6267	0.22574
31	75	0	7.3625	0.00429	3.34E-05	0.00216	0.00209	0.00647	0.05723	0.485	0.03268	0.03179	0.04078	0.09804	0.018011	20.986	0.64161	0.6196	0.14515
27.883	63	0	5.341	0.00961	7.04E-05	0.00549	0.00504	0.01647	0.04391	0.385	0.02545	0.02375	0.03089	0.07636	0.083288	15.32	0.65252	0.66396	0.26005
27.729	63	0	12.337	0.00453	3.48E-05	0.00184	0.00217	0.00553	0.03724	0.333	0.01985	0.02237	0.02984	0.05956	0.023868	18.809	0.62695	0.6569	0.2074
27.575	63	0	19.336	0.00764	5.64E-05	0.00393	0.00354	0.01179	0.0447	0.391	0.02263	0.02692	0.03313	0.06788	0.06057	17.282	0.62901	0.57039	0.30351
27.421	63	0	26.335	0.01507	0.0001118	0.00897	0.00732	0.02692	0.04909	0.474	0.02705	0.02863	0.0366	0.08114	0.079149	15.26	0.58429	0.6509	0.27864
27.267	63	0	33.336	0.00598	4.55E-05	0.00262	0.00293	0.00785	0.04095	0.377	0.02144	0.02422	0.03217	0.06433	0.026309	19.064	0.4868	0.6648	0.24946
27.114	63	0	40.335	0.00801	5.83E-05	0.00378	0.00381	0.01134	0.03689	0.366	0.01861	0.02086	0.02928	0.05583	0.029995	20.743	0.49937	0.65856	0.24441
26.96	63	0	47.335	0.0063	7.21E-05	0.00211	0.00346	0.00634	0.02372	0.216	0.00999	0.01388	0.01957	0.02996	0.030418	17.386	0.72858	0.63913	0.25368
26.806	63	0	54.333	0.00625	5.57E-05	0.0035	0.0037	0.0105	0.09806	0.857	0.0543	0.0645	0.07662	0.16289	0.032296	16.563	0.53852	0.72324	0.27222
26.652	63	0	61.335	0.0069	5.73E-05	0.00296	0.00336	0.00887	0.05279	0.478	0.02797	0.03417	0.04163	0.08391	0.03042	18.473	0.60864	0.63801	0.25823
26.498	63	0	68.333	0.01062	8.54E-05	0.00526	0.00525	0.01579	0.03556	0.327	0.01952	0.02258	0.02878	0.05855	0.044461	17.444	0.57141	0.73747	0.31996
26.344	63	0	75.333	0.00813	5.59E-05	0.00412	0.00339	0.01237	0.04557	0.416	0.02323	0.02928	0.03637	0.06968	0.034391	21.352	0.52129	0.68036	0.22936
26.19	63	0	82.334	0.00688	5.27E-05	0.00326	0.00422	0.00979	0.0737	0.659	0.04225	0.04671	0.05615	0.12675	0.027334	17.518	0.56175	0.70538	0.30531
26.037	63	0	89.334	0.0062	4.71E-05	0.00299	0.00349	0.00898	0.04958	0.471	0.02542	0.03071	0.03973	0.07627	0.028944	20.268	0.54525	0.644	0.23057
26.237	63	0	96.341	0.00394	2.98E-05	0.00183	0.00214	0.0055	0.04808	0.424	0.02517	0.03066	0.04398	0.0755	0.010132	21.677	0.60817	0.64056	0.19316
26.548	63	0	103.33	0.0044	3.18E-05	0.00212	0.00249	0.00635	0.0369	0.325	0.02017	0.02352	0.02504	0.06052	0.017595	21.33	0.53836	0.64771	0.18748
26.859	63	0	110.33	0.00337	2.22E-05	0.00183	0.00206	0.00549	0.03354	0.294	0.01828	0.02272	0.02601	0.05485	0.005237	24.326	0.34864	0.69078	0.15284
27.17	63	0	117.33	0.00831	5.65E-05	0.00426	0.00335	0.01277	0.05222	0.483	0.02908	0.03256	0.03807	0.08724	0.03105	19.754	0.51184	0.68937	0.26936
27.482	63	0	124.34	0.00747	5.23E-05	0.0044	0.00423	0.01319	0.087	0.765	0.04757	0.05336	0.06483	0.14272	0.028651	18.697	0.4809	0.70231	0.24381
27.793	63	0	131.34	0.00796	5.85E-05	0.00405	0.00377	0.01216	0.07554	0.66	0.04198	0.04346	0.05441	0.12594	0.03781	16.964	0.63482	0.66627	0.28338
28.104	63	0	138.33	0.01411	0.00010452	0.00782	0.00845	0.02346	0.05676	0.509	0.03182	0.03479	0.04339	0.09546	0.062465	14.901	0.59312	0.73704	0.39212
28.415	63	0	145.33	0.00611	4.95E-05	0.00287	0.00299	0.00861	0.05221	0.471	0.02838	0.03234	0.04213	0.08514	0.027015	19.428	0.6032	0.64211	0.23718
28.726	63	0	152.33	0.00713	5.84E-05	0.00336	0.00376	0.01009	0.04203	0.395	0.0224	0.02636	0.02838	0.06719	0.044268	18.596	0.67918	0.63152	0.25547
29.037	63	0	159.33	0.00504	3.93E-05	0.00205	0.00262	0.00616	0.05628	0.501	0.02931	0.03514	0.04184	0.08793	0.028238	21.181	0.55493	0.65008	0.22133
29.348	63	0	166.33	0.01009	8.33E-05	0.00575	0.0054	0.01725	0.07253	0.659	0.03826	0.04762	0.06378	0.11479	0.048126	16.139	0.55612	0.69473	0.31618
29.659	63	0	173.33	0.00825	6.87E-05	0.00438	0.00462	0.01314	0.0389	0.428	0.0193	0.02412	0.03715	0.0579	0.031465	20.708	0.67308	0.63913	0.24691
29.97	63	0	180.33	0.01191	9.87E-05	0.00658	0.0063	0.01975	0.0759	0.701	0.04136	0.04708	0.05939	0.12408	0.078854	15.543	0.65923	0.67006	0.34202
27.883	63	0	5.3417	0.00342	2.51E-05	0.00146	0.00173	0.00439	0.03997	0.346	0.02231	0.02339	0.03218	0.06693	0.013113	23.062	0.5564	0.61898	0.14509
27.729	63	0	12.337	0.00612	4.13E-05	0.00343	0.00305	0.01029	0.03364	0.305	0.01751	0.01939	0.02478	0.05252	0.025014	20.009	0.55579	0.60139	0.18865
27.575	63	0	19.336	0.00324	2.21E-05	0.0013	0.00154	0.0039	0.03045	0.34	0.01443	0.01796	0.02949	0.04329	0.019565	21.515	0.52473	0.54936	0.3047
27.421	63	0	26.335	0.00482	3.50E-05	0.00154	0.0018	0.00462	0.04222	0.37	0.02246	0.0269	0.03515	0.06738	0.017817	21.298	0.50172	0.62809	0.32841
27.267	63	0	33.336	0.00391	2.99E-05	0.00171	0.00213	0.00512	0.02668	0.234	0.01272	0.01601	0.02346	0.03816	0.009129	22.879	0.4966	0.60305	0.18903
27.113	63	0	40.336	0.00482	3.48E-05	0.00208	0.00182	0.00623	0.0253	0.231	0.01346	0.01578	0.01971	0.04039	0.01868	22.335	0.51378	0.63387	0.18023
26.96	63	0	47.335	0.00429	4.57E-05	0.00153	0.00266	0.00458	0.02215	0.189	0.01135	0.01377	0.01809	0.03406	0.022188	19.987	0.70366	0.59776	0.20363
26.806	63	0	54.334	0.00522	4.35E-05	0.00257	0.00309	0.00771	0.06308	0.551	0.03484	0.04049	0.04532	0.10452	0.019584	19.467	0.56218	0.64886	0.23894
26.652	63	0	61.336	0.0043	3.13E-05	0.0018	0.00242	0.00541	0.03839	0.342	0.01698	0.0231	0.0347	0.05094	0.014374	21.744	0.57917	0.59831	0.22532
26.498	63	0	68.333	0.00416	3.10E-05	0.00206	0.00247	0.00619	0.04064	0.359	0.02061	0.02727	0.03281	0.06184	0.008363	23.7	0.37894	0.6851	0.19642
26.344	63	0	75.334	0.00605	4.20E-05	0.00338	0.00322	0.01013	0.03075	0.263	0.01533	0.02031	0.02621	0.046	0.028223	23.543	0.52279	0.65426	0.23004
26.19	63	0	82.335	0.00493	3.64E-05	0.00247	0.00287	0.00741	0.04086	0.361	0.02158	0.02707	0.03491	0.06474	0.01215	21.436	0.42125	0.64416	0.25008
26.037	63	0	89.335	0.00379	2.86E-05	0.00189	0.00219	0.00567	0.02151	0.188	0.01079	0.01288	0.01749	0.03238	0.007893	24.247	0.45958	0.63409	0.15632
26.237	63	0	96.341	0.00561	4.36E-05	0.00265	0.00316	0.00794	0.03839	0.346	0.02084	0.02471	0.0312	0.06252	0.022251	20.846	0.52511	0.63494	0.2456
26.548	63	0	103.33	0.00551	3.75E-05	0.00297	0.00303	0.0089	0.02724	0.237	0.01517	0.01738	0.02171	0.04552	0.019034	21.885	0.50262	0.63071	0.2197
26.859	63	0	110.33	0.00427	2.75E-05	0.00204	0.00179	0.00613	0.03631	0.328	0.01992	0.022	0.02597	0.05975	0.014712	23.838	0.43556	0.63547	0.13364
27.17	63	0	117.33	0.00493	3.26E-05	0.00244	0.00238	0.00733	0.02226	0.216	0.01143	0.01379	0.01985	0.03429	0.024797	23.526	0.39939	0.64157	0.1581
27.482	63	0	124.34	0.00969	6.64E-05	0.0053	0.00563	0.01591	0.03889	0.378	0.01995	0.02451	0.02989	0.05985	0.06618	17.262	0.66185	0.624	0.29932
27.793	63	0	131.34	0.00514	3.88E-05	0.00246	0.00228	0.00739	0.05478	0.496	0.03062	0.03554	0.04535	0.09187	0.022496	20.81	0.55112	0.64053	0.23738
28.104	63	0	138.33	0.00433	3.21E-05	0.002	0.00224	0.006	0.03686	0.339	0.02021	0.0221	0.02818	0.06062	0.024564	21.544	0.53167	0.64576	0.19975
28.415	63	0	145.33	0.00592	4.72E-05	0.00287	0.00277	0.0086	0.04756	0.439	0.02627	0.03255	0.03853	0.07881	0.031256	19.093	0.60753	0.62395	0.27343
28.726	63	0	152.33	0.00618	4.97E-05	0.00254	0.00319	0.00761	0.04376	0.405	0.02416	0.02732	0.03661	0.07249	0.030546	19.956	0.54756	0.63314	0.21922
29.037	63	0	159.34	0.00482	3.69E-05	0.00233	0.00242	0.00698	0.04564	0.431	0.02336	0.0298	0.0364	0.07009	0.023922	21.714	0.52553	0.64583	0.22767
29.348	63	0	166.33	0.00522	4.31E-05	0.00258	0.00281	0.00773	0.04951	0.433	0.02709	0.02929	0.03628	0.08127	0.017593	19.686	0.52183	0.6762	0.21807
29.659	63	0	173.33	0.00681	5.57E-05	0.00403	0.00354	0.01208	0.04052	0.353	0.02405	0.02263	0.02678	0.07215	0.029134	19.597	0.4592	0.65054	0.23392
29.97	63	0	180.33	0.00663	5.53E-05	0.00322	0.00428	0.00965	0.04534	0.436	0.02441	0.0267	0.03535	0.07322	0.03301	20.638	0.50332	0.65305	0.28409
27.883	63	0	5.3417	0.00766	5.78E-05	0.00403	0.00321	0.01208	0.05723	0.507	0.03123	0.03761	0.04668	0.0937	0.030835	21.233	0.60286	0.60879	0.22501
27.729	63	0	12.338	0.00434	2.87E-05	0.00168	0.00147	0.00503	0.02162	0.2	0.01139	0.01198	0.01543	0.03417	0.018049	25.009	0.45257	0.6052	0.14853
27.575	63	0	19.336	0.00541	3.84E-05	0.00236	0.00218	0.00707	0.03922	0.368	0.0189	0.02388	0.03485	0.0567	0.021113	21.387	0.59164	0.5391	0.18914
27.421	63	0	26.335	0.0028	1.95E-05	0.00132	0.0015	0.00396	0.02696	0.236	0.01472	0.01622	0.02145	0.04417	0.005606	24.501	0.51282	0.60418	0.15004
27.267	63	0	33.336	0.00345	2.65E-05	0.00164	0.00204	0.00493	0.03537	0.314	0.01874	0.02331	0.02677	0.05623	0.007791	23.084	0.46682	0.60435	0.17928
27.113	63	0	40.336	0.0053	3.80E-05	0.00204	0.00195	0.00611	0.03065	0.287	0.01424	0.01802	0.02726	0.04272	0.026936	21.764	0.53125	0.61213	0.20326
26.96	63	0	47.336	0.00584	6.23E-05	0.00179	0.00288	0.00536	0.02541	0.225	0.01336	0.01528	0.0174	0.04007	0.034323	19.225	0.67475	0.5863	0.22122
26.806	63	0	54.334	0.00621	4.73E-05	0.00296	0.00241	0.00887	0.03963	0.369	0.01992	0.0243	0.03559	0.05975	0.028254	21.227	0.55548	0.62515	0.22575
26.652	63	0	61.336	0.00414	3.19E-05	0.00163	0.00205	0.00489	0.02454	0.242	0.0121	0.01508	0.02051	0.03631	0.017591	22.675	0.60521	0.61561	0.19044
26.498	63	0	68.334	0.0065	4.69E-05	0.00322	0.00304	0.00965	0.04754	0.462	0.02474	0.03169	0.03368	0.07422	0.027407	22.195	0.48423	0.66521	0.27436
26.344	63	0	75.334	0.00368	2.53E-05	0.0018	0.00227	0.00541	0.02484	0.216	0.01394	0.01527	0.01906	0.04183	0.013646	24.057	0.47653	0.64837	0.17776
26.19	63	0	82.335	0.00399	2.96E-05	0.00196	0.00232	0.00588	0.03863	0.352	0.02177	0.02495	0.02902	0.06532	0.012604	23.872	0.45471	0.66858	0.18152
26.037	63	0	89.335	0.00723	5.25E-05	0.00353	0.00282	0.01058	0.02869	0.27	0.01447	0.01717	0.02306	0.04341	0.024868	24.561	0.51553	0.62292	0.17194
26.237	63	0	96.342	0.00338	2.47E-05	0.00142	0.00165	0.00425	0.03413	0.298	0.01706	0.02234	0.03183	0.05119	0.013368	24.089	0.50636	0.62922	0.16919
26.548	63	0	103.33	0.00388	2.78E-05	0.00198	0.00202	0.00595	0.02124	0.186	0.01103	0.01389	0.01798	0.03308	0.01076	24.277	0.42468	0.62158	0.16981
26.859	63	0	110.34	0.00337	2.18E-05	0.00154	0.00199	0.00461	0.03606	0.315	0.01915	0.02357	0.02796	0.05746	0.008026	24.404	0.4268	0.63421	0.16441
27.17	63	0	117.33	0.0036	2.47E-05	0.0014	0.0017	0.00421	0.0223	0.219	0.01098	0.01231	0.01675	0.03295	0.017872	24.993	0.47515	0.63291	0.20596
27.482	63	0	124.34	0.00814	5.51E-05	0.00411	0.00453	0.01232	0.05132	0.468	0.02692	0.03288	0.03926	0.08076	0.035247	18.717	0.58817	0.64313	0.24688
27.793	63	0	131.34	0.00442	3.11E-05	0.00185	0.00222	0.00556	0.02889	0.287	0.01578	0.01817	0.02181	0.04735	0.032316	24.035	0.5517	0.62377	0.14132
28.104	63	0	138.33	0.00425	3.13E-05	0.00185	0.00219	0.00555	0.02708	0.246	0.01376	0.01662	0.02374	0.04127	0.014412	21.56	0.48625	0.66037	0.19647
28.415	63	0	145.33	0.00606	4.58E-05	0.00294	0.0028	0.00882	0.04794	0.419	0.02525	0.02882	0.03888	0.07574	0.02509	20.889	0.54262	0.63332	0.19286
28.726	63	0	152.33	0.00669	5.40E-05	0.00293	0.00306	0.00878	0.04923	0.435	0.0274	0.03073	0.03446	0.08219	0.039106	20.289	0.52307	0.63784	0.28957
29.037	63	0	159.34	0.00651	5.02E-05	0.00249	0.00236	0.00748	0.03143	0.302	0.016	0.01839	0.02456	0.048	0.032416	20.783	0.54211	0.64256	0.21322
29.348	63	0	166.33	0.00544	4.53E-05	0.00252	0.00266	0.00755	0.05043	0.458	0.02841	0.03207	0.04032	0.08523	0.019649	19.975	0.50457	0.67891	0.20968
29.659	63	0	173.34	0.00631	5.45E-05	0.00338	0.00373	0.01014	0.02977	0.269	0.01543	0.01927	0.0245	0.0463	0.027356	20.106	0.55835	0.63535	0.29183
29.97	63	0	180.33	0.00589	4.99E-05	0.00305	0.00334	0.00916	0.04875	0.44	0.02703	0.02789	0.03808	0.0811	0.021519	19.515	0.56911	0.65133	0.26749
27.883	63	0	5.3431	0.00743	5.46E-05	0.00365	0.00426	0.01094	0.06334	0.564	0.03481	0.04098	0.0476	0.10442	0.050076	19.661	0.52358	0.6433	0.2401
27.729	63	0	12.339	0.0027	1.80E-05	0.00136	0.00154	0.00407	0.02513	0.222	0.0139	0.01509	0.01854	0.04171	0.005225	24.336	0.5297	0.63393	0.14781
27.575	63	0	19.338	0.00511	3.91E-05	0.00268	0.00289	0.00804	0.05681	0.522	0.03263	0.03538	0.04075	0.09788	0.036217	18.331	0.5842	0.57765	0.21979
27.421	63	0	26.337	0.00729	5.63E-05	0.00339	0.00309	0.01017	0.04512	0.41	0.02402	0.02819	0.03594	0.07205	0.047592	20.324	0.46697	0.65297	0.21789
27.267	63	0	33.338	0.00422	3.03E-05	0.00147	0.00211	0.00442	0.03038	0.278	0.01374	0.0177	0.02713	0.04121	0.022734	23.209	0.57855	0.62571	0.18288
27.113	63	0	40.338	0.00451	3.25E-05	0.00231	0.0024	0.00693	0.03902	0.34	0.02113	0.02499	0.02832	0.06338	0.012306	22.051	0.48666	0.65246	0.17684
26.96	63	0	47.338	0.0051	5.45E-05	0.00166	0.00241	0.00498	0.02414	0.212	0.01114	0.01507	0.02002	0.03343	0.025892	18.81	0.69988	0.60761	0.19676
26.806	63	0	54.335	0.00656	5.31E-05	0.00308	0.00293	0.00923	0.04868	0.444	0.02644	0.02828	0.03676	0.07931	0.028934	20.376	0.57956	0.66104	0.25544
26.652	63	0	61.338	0.00548	4.32E-05	0.00259	0.00259	0.00776	0.03919	0.353	0.02147	0.02547	0.03266	0.0644	0.017563	21.109	0.56231	0.6418	0.20707
26.498	63	0	68.335	0.00734	5.58E-05	0.00378	0.00352	0.01133	0.06582	0.585	0.037	0.0409	0.04819	0.111	0.024216	20.183	0.49116	0.68277	0.26629
26.344	63	0	75.336	0.00688	5.31E-05	0.0038	0.00337	0.0114	0.04435	0.39	0.02573	0.02721	0.03122	0.0772	0.01884	20.144	0.49976	0.70115	0.23236
26.19	63	0	82.336	0.00936	6.98E-05	0.00511	0.00498	0.01533	0.06709	0.61	0.03838	0.04078	0.04449	0.11513	0.044893	17.214	0.51815	0.67349	0.31852
26.037	63	0	89.336	0.00415	3.25E-05	0.00231	0.0023	0.00694	0.02945	0.257	0.01682	0.01784	0.02024	0.05045	0.0093	23.734	0.4708	0.62403	0.13471
26.237	63	0	96.343	0.00403	2.91E-05	0.00178	0.00181	0.00534	0.02891	0.263	0.0142	0.01697	0.02276	0.04261	0.0155	23.56	0.51807	0.63926	0.2265
26.548	63	0	103.34	0.01615	0.00011885	0.00985	0.00897	0.02955	0.0489	0.422	0.02723	0.03128	0.03247	0.0817	0.096174	13.217	0.54539	0.67662	0.34242
26.859	63	0	110.34	0.01043	7.47E-05	0.00569	0.00458	0.01706	0.04562	0.407	0.0248	0.02869	0.03643	0.0744	0.038106	21.388	0.5109	0.68212	0.2508
27.17	63	0	117.33	0.00443	3.16E-05	0.00201	0.00248	0.00603	0.03579	0.327	0.0181	0.02442	0.03162	0.05429	0.015346	21.743	0.47708	0.7012	0.22297
27.482	63	0	124.34	0.00538	3.73E-05	0.00263	0.00273	0.00789	0.04679	0.429	0.02492	0.03002	0.03449	0.07477	0.020272	21.151	0.4859	0.66605	0.21328
27.793	63	0	131.34	0.00589	4.29E-05	0.00301	0.00347	0.00903	0.06121	0.554	0.03521	0.0372	0.04491	0.10563	0.028981	20.505	0.46515	0.67619	0.25091
28.104	63	0	138.34	0.00658	5.03E-05	0.00289	0.00252	0.00867	0.03358	0.305	0.01816	0.0194	0.02609	0.05447	0.026231	21.116	0.53808	0.63932	0.32201
28.415	63	0	145.34	0.00742	6.36E-05	0.00334	0.00362	0.01003	0.05455	0.486	0.02937	0.03542	0.05153	0.08812	0.040277	16.708	0.67708	0.65852	0.2828
28.726	63	0	152.33	0.00484	4.00E-05	0.00199	0.00264	0.00598	0.03148	0.29	0.01657	0.0184	0.02587	0.04971	0.021838	22.342	0.50935	0.65189	0.1667
29.037	63	0	159.34	0.00578	4.48E-05	0.00294	0.0031	0.00883	0.04132	0.361	0.02287	0.02597	0.02887	0.06862	0.02757	21.193	0.48094	0.68188	0.26728
29.348	63	0	166.33	0.01137	9.50E-05	0.00631	0.005	0.01893	0.08252	0.737	0.04786	0.05212	0.06126	0.14359	0.075578	16.279	0.56205	0.67865	0.27768
29.659	63	0	173.34	0.00688	6.10E-05	0.00359	0.00326	0.01076	0.03377	0.297	0.01827	0.02132	0.0289	0.0548	0.02296	20.459	0.45396	0.66843	0.25245
29.971	63	0	180.34	0.00774	6.08E-05	0.00414	0.00417	0.01243	0.04698	0.426	0.02553	0.02861	0.03624	0.07658	0.026459	17.306	0.56645	0.68765	0.28582
27.883	63	0	5.3431	0.00546	4.06E-05	0.00256	0.00229	0.00767	0.05062	0.457	0.02629	0.03349	0.04395	0.07886	0.031263	21.581	0.52095	0.60775	0.20761
27.729	63	0	12.339	0.00815	5.54E-05	0.0038	0.0021	0.0114	0.02625	0.254	0.01322	0.01393	0.01976	0.03965	0.052653	23.115	0.50737	0.61455	0.21871
27.575	63	0	19.338	0.00757	5.49E-05	0.0035	0.00337	0.0105	0.05255	0.488	0.02629	0.02839	0.04303	0.07887	0.043949	16.948	0.65364	0.55124	0.2785
27.421	63	0	26.338	0.00739	5.35E-05	0.00309	0.00173	0.00928	0.03604	0.349	0.0183	0.02144	0.03235	0.05489	0.038717	22.416	0.51204	0.60779	0.19423
27.267	63	0	33.338	0.00482	3.49E-05	0.00203	0.00219	0.0061	0.0365	0.335	0.01913	0.02114	0.03309	0.05738	0.019469	22.239	0.48694	0.60824	0.19616
27.113	63	0	40.338	0.00615	4.65E-05	0.00281	0.00221	0.00843	0.0363	0.345	0.0183	0.02149	0.03361	0.0549	0.030435	21.012	0.49208	0.65917	0.22907
26.96	63	0	47.338	0.00497	5.23E-05	0.00194	0.00254	0.00581	0.02528	0.223	0.01307	0.01607	0.01956	0.03922	0.026062	19.017	0.6829	0.60781	0.19204
26.806	63	0	54.336	0.00459	3.40E-05	0.00188	0.00229	0.00565	0.03246	0.305	0.01555	0.0185	0.02696	0.04664	0.014908	21.752	0.5422	0.63342	0.21941
26.652	63	0	61.338	0.00347	2.65E-05	0.00186	0.0019	0.00557	0.02312	0.205	0.01302	0.01303	0.01652	0.03905	0.010251	23.693	0.4832	0.62029	0.12917
26.498	63	0	68.335	0.00533	3.96E-05	0.00253	0.00277	0.00759	0.04574	0.401	0.02445	0.02975	0.03739	0.07335	0.014792	22.13	0.42968	0.66613	0.23802
26.344	63	0	75.336	0.00401	2.96E-05	0.00179	0.00231	0.00538	0.03456	0.302	0.01759	0.02272	0.02765	0.05278	0.007992	22.882	0.44354	0.66532	0.21859
26.19	63	0	82.337	0.00522	3.78E-05	0.00312	0.00279	0.00935	0.04485	0.4	0.02783	0.02432	0.02816	0.0835	0.012735	22.787	0.40089	0.65773	0.16379
26.037	63	0	89.337	0.00333	2.58E-05	0.00163	0.00192	0.0049	0.02248	0.198	0.01293	0.01284	0.01526	0.03879	0.012951	24.686	0.51916	0.6077	0.15139
26.238	63	0	96.344	0.00351	2.55E-05	0.00157	0.00168	0.00471	0.02951	0.258	0.01487	0.01816	0.02445	0.0446	0.00953	24.721	0.45563	0.62011	0.1579
26.548	63	0	103.34	0.00676	4.86E-05	0.00347	0.003	0.0104	0.03612	0.327	0.01864	0.02218	0.02781	0.05591	0.035801	21.8	0.522	0.64377	0.29962
26.859	63	0	110.34	0.00568	3.87E-05	0.00293	0.00239	0.00878	0.04675	0.425	0.02473	0.03066	0.03342	0.0742	0.019124	22.028	0.47893	0.64557	0.1853
27.17	63	0	117.33	0.00712	4.71E-05	0.00364	0.00362	0.01091	0.02742	0.282	0.01453	0.01597	0.02008	0.0436	0.025016	22.169	0.42739	0.66476	0.19435
27.482	63	0	124.34	0.00424	2.92E-05	0.00186	0.00242	0.00558	0.02937	0.272	0.01429	0.01774	0.02555	0.04287	0.012142	22.228	0.52528	0.65305	0.19178
27.793	63	0	131.34	0.00543	3.76E-05	0.00228	0.00226	0.00685	0.04125	0.38	0.02056	0.02688	0.03082	0.06167	0.018338	22.182	0.55653	0.6441	0.23419
28.104	63	0	138.34	0.00314	2.36E-05	0.00121	0.00167	0.00363	0.0378	0.344	0.02054	0.02204	0.02753	0.06161	0.006303	24.721	0.43093	0.64113	0.15844
28.415	63	0	145.34	0.00551	4.66E-05	0.00255	0.00305	0.00764	0.05617	0.506	0.03043	0.03294	0.05098	0.0913	0.025627	18.506	0.67654	0.63579	0.25731
28.726	63	0	152.33	0.00298	2.42E-05	0.00133	0.00176	0.004	0.03045	0.267	0.01707	0.01976	0.02297	0.05122	0.00718	23.582	0.47696	0.65385	0.14821
29.037	63	0	159.34	0.00675	5.38E-05	0.00342	0.00272	0.01026	0.04348	0.41	0.02299	0.02581	0.03212	0.06896	0.021165	21.286	0.48079	0.64376	0.3129
29.348	63	0	166.33	0.00761	6.19E-05	0.00387	0.0037	0.01161	0.04576	0.406	0.02476	0.029	0.03234	0.07429	0.038694	17.189	0.56608	0.69019	0.29098
29.659	63	0	173.34	0.00648	5.36E-05	0.00286	0.00355	0.00858	0.04002	0.396	0.02179	0.0233	0.02753	0.06537	0.023701	20.212	0.48974	0.66778	0.24456
29.971	63	0	180.34	0.00573	4.62E-05	0.00281	0.00311	0.00842	0.04473	0.393	0.02571	0.02861	0.03293	0.07712	0.02508	18.861	0.55406	0.65455	0.24161
27.883	63	0	5.3438	0.0068	4.79E-05	0.00337	0.00247	0.01011	0.04967	0.456	0.02754	0.02993	0.03936	0.08261	0.030772	19.633	0.60723	0.60815	0.17303
27.729	63	0	12.34	0.0044	2.98E-05	0.00172	0.00144	0.00517	0.02183	0.206	0.01047	0.01262	0.01804	0.03141	0.021044	23.688	0.54995	0.59096	0.2625
27.575	63	0	19.338	0.00774	5.59E-05	0.00329	0.00301	0.00986	0.06588	0.593	0.03422	0.04329	0.06193	0.10266	0.038715	18.074	0.58937	0.54542	0.32577
27.421	63	0	26.338	0.00942	6.49E-05	0.00509	0.00375	0.01527	0.04194	0.4	0.02417	0.02209	0.02927	0.0725	0.035487	19.09	0.55682	0.61162	0.20387
27.267	63	0	33.339	0.00346	2.49E-05	0.00138	0.00152	0.00414	0.03508	0.321	0.01956	0.02177	0.0287	0.05868	0.010784	24.322	0.45725	0.61828	0.11558
27.113	63	0	40.338	0.00697	4.91E-05	0.00401	0.00351	0.01202	0.03109	0.291	0.01568	0.0194	0.02399	0.04704	0.030981	21.122	0.5066	0.63871	0.29781
26.96	63	0	47.338	0.00358	3.76E-05	0.00144	0.00219	0.00433	0.02883	0.242	0.01638	0.01678	0.01948	0.04913	0.01617	19.674	0.67566	0.60339	0.1845
26.806	63	0	54.336	0.00491	3.68E-05	0.00234	0.00232	0.00701	0.04178	0.381	0.02333	0.02506	0.03149	0.06998	0.016047	21.422	0.56948	0.62477	0.18653
26.652	63	0	61.339	0.00345	2.61E-05	0.00123	0.00173	0.0037	0.0219	0.203	0.01005	0.01292	0.01947	0.03016	0.011768	24.717	0.52871	0.59785	0.16002
26.498	63	0	68.336	0.00409	2.92E-05	0.00216	0.00248	0.00647	0.03916	0.35	0.01936	0.02481	0.03476	0.05807	0.008555	23.453	0.47882	0.66788	0.19773
26.344	63	0	75.337	0.00721	5.20E-05	0.00418	0.00341	0.01254	0.03829	0.35	0.02098	0.02418	0.0273	0.06295	0.020201	23.48	0.38056	0.67199	0.16845
26.19	63	0	82.337	0.00321	2.30E-05	0.00139	0.00172	0.00416	0.02706	0.24	0.01444	0.01641	0.02217	0.04333	0.008084	25.396	0.49907	0.63905	0.14016
26.037	63	0	89.337	0.00408	3.13E-05	0.00222	0.00215	0.00666	0.02119	0.187	0.012	0.01404	0.01681	0.03599	0.009783	24.151	0.47654	0.61323	0.16398
26.238	63	0	96.344	0.00269	1.96E-05	0.00122	0.00155	0.00365	0.02052	0.179	0.0107	0.01282	0.01948	0.03209	0.006531	24.961	0.50115	0.61136	0.14055
26.548	63	0	103.34	0.00346	2.47E-05	0.00178	0.00193	0.00535	0.02703	0.235	0.01476	0.01801	0.0232	0.04427	0.007692	23.252	0.45862	0.62971	0.16035
26.859	63	0	110.34	0.00513	3.27E-05	0.00255	0.00241	0.00766	0.04349	0.39	0.02265	0.02619	0.03169	0.06796	0.01721	23.458	0.43906	0.65884	0.2119
27.17	63	0	117.33	0.00624	4.01E-05	0.00327	0.00344	0.00982	0.02227	0.234	0.01186	0.01298	0.01547	0.03559	0.033367	24.87	0.4314	0.63502	0.18812
27.482	63	0	124.34	0.00688	4.67E-05	0.00411	0.00349	0.01232	0.06034	0.541	0.03538	0.03355	0.03822	0.10615	0.032892	20.345	0.47532	0.65571	0.26571
27.793	63	0	131.34	0.00575	3.96E-05	0.00273	0.00277	0.0082	0.03627	0.343	0.01861	0.02245	0.0309	0.05582	0.030279	22.367	0.46896	0.6821	0.22154
28.104	63	0	138.34	0.00446	3.30E-05	0.00176	0.0019	0.00528	0.03932	0.349	0.02115	0.02558	0.03294	0.06346	0.018146	23.253	0.4753	0.65354	0.2248
28.415	63	0	145.34	0.00781	6.35E-05	0.00427	0.0041	0.0128	0.04667	0.42	0.02286	0.03165	0.04307	0.06857	0.037094	19.838	0.57207	0.62822	0.27432
28.726	63	0	152.33	0.01191	9.30E-05	0.0061	0.0058	0.01831	0.04739	0.467	0.02402	0.02741	0.03484	0.07206	0.093994	18.128	0.67846	0.65462	0.3697
29.037	63	0	159.34	0.00673	5.02E-05	0.00308	0.00274	0.00925	0.04954	0.448	0.02766	0.03222	0.03421	0.08298	0.021363	20.11	0.50299	0.66867	0.23088
29.348	63	0	166.33	0.00907	7.62E-05	0.00507	0.00428	0.0152	0.06698	0.585	0.03742	0.04583	0.05196	0.11226	0.051443	15.704	0.6183	0.6752	0.29048
29.659	63	0	173.34	0.00718	6.10E-05	0.00372	0.00373	0.01116	0.03241	0.299	0.01728	0.01977	0.02506	0.05184	0.027899	21.698	0.5223	0.65212	0.25618
29.971	63	0	180.34	0.00631	5.10E-05	0.00296	0.00266	0.00888	0.04276	0.383	0.02297	0.02706	0.03429	0.06891	0.024909	20.662	0.55235	0.67742	0.22587
16.664	72	0	51.587	0.01638	0.00016779	0.00909	0.00726	0.02726	0.03555	0.289	0.01502	0.02084	0.03401	0.04507	0.088541	15.585	0.75155	0.68253	0.48156
16.816	72	0	56.306	0.00526	6.02E-05	0.00142	0.00237	0.00426	0.03701	0.319	0.01283	0.01819	0.03835	0.0385	0.029579	19.507	0.70792	0.6007	0.19844
17.042	72	0	63.297	0.00589	5.91E-05	0.00243	0.00325	0.0073	0.03547	0.309	0.01767	0.02373	0.02763	0.05302	0.024308	18.698	0.68927	0.59795	0.26166
17.268	72	0	70.294	0.00689	7.56E-05	0.00256	0.00335	0.00767	0.03652	0.359	0.01507	0.0204	0.03126	0.04522	0.036989	18.735	0.77125	0.60109	0.28764
17.493	72	0	77.296	0.0068	6.22E-05	0.00341	0.0031	0.01022	0.03416	0.32	0.0153	0.02095	0.03137	0.0459	0.041421	19.392	0.57483	0.61006	0.31433
17.719	72	0	84.3	0.00613	6.95E-05	0.00196	0.00328	0.00587	0.02732	0.255	0.01173	0.01547	0.02509	0.03518	0.022147	18.809	0.66645	0.62623	0.24905
17.945	72	0	91.301	0.00445	4.88E-05	0.0014	0.00223	0.00419	0.02725	0.229	0.01411	0.0174	0.02477	0.04232	0.016092	19.18	0.668	0.57652	0.18805
17.681	72	0	98.298	0.00416	3.78E-05	0.00163	0.0021	0.00488	0.02562	0.233	0.00943	0.01224	0.02385	0.0283	0.014788	22.788	0.5987	0.59461	0.19128
17.259	72	0	105.3	0.00959	9.08E-05	0.0048	0.00483	0.0144	0.03135	0.316	0.0136	0.01774	0.03206	0.0408	0.048737	20.726	0.55012	0.59127	0.37426
16.837	72	0	112.3	0.00851	9.26E-05	0.00395	0.00518	0.01185	0.04786	0.448	0.02505	0.03164	0.03363	0.07514	0.036701	16.935	0.62734	0.59694	0.35974
16.416	72	0	119.3	0.00545	4.75E-05	0.00223	0.00221	0.0067	0.02484	0.218	0.01297	0.01481	0.01818	0.03892	0.019363	22.159	0.59663	0.56336	0.25297
15.994	72	0	126.3	0.00761	7.87E-05	0.00299	0.00432	0.00898	0.03262	0.306	0.01562	0.01987	0.02551	0.04687	0.026252	20.219	0.65355	0.60732	0.27239
15.571	72	0	133.32	0.01109	0.00010639	0.00548	0.00466	0.01645	0.04045	0.349	0.02084	0.02141	0.03116	0.06252	0.057421	18.483	0.60834	0.61727	0.35598
15.153	72	0	140.26	0.00541	5.15E-05	0.00231	0.00305	0.00692	0.03358	0.298	0.01774	0.02065	0.02826	0.05323	0.024487	21.19	0.55722	0.60309	0.23598
14.731	72	0	147.27	0.00421	3.86E-05	0.00174	0.00217	0.00521	0.03046	0.289	0.01527	0.01868	0.02532	0.0458	0.02287	20.888	0.54314	0.5965	0.17279
14.31	72	0	154.26	0.00482	4.38E-05	0.00188	0.00244	0.00565	0.02837	0.28	0.01401	0.01824	0.02584	0.04204	0.016829	22.69	0.49461	0.59508	0.19398
13.886	72	0	161.3	0.00949	9.37E-05	0.00401	0.00475	0.01203	0.04118	0.417	0.02116	0.02502	0.03292	0.06349	0.049932	19.388	0.67254	0.58816	0.30947
13.464	72	0	168.3	0.00703	6.94E-05	0.00232	0.0034	0.00697	0.03297	0.338	0.0127	0.01854	0.0325	0.03809	0.027968	18.804	0.65294	0.57507	0.24513
13.042	72	0	175.3	0.01214	0.00012197	0.00566	0.00619	0.01699	0.06207	0.558	0.0296	0.02643	0.04478	0.0888	0.10281	15.252	0.72632	0.60198	0.486
15.234	72	0	7.2583	0.00925	0.0001028	0.00523	0.00522	0.0157	0.0291	0.251	0.01512	0.01848	0.0255	0.04537	0.040917	17.133	0.59826	0.64693	0.35412
15.461	72	0	14.303	0.0045	4.55E-05	0.00187	0.00282	0.00561	0.02496	0.219	0.01163	0.0138	0.02046	0.03488	0.015782	21.968	0.60614	0.59188	0.2262
15.687	72	0	21.305	0.00771	8.64E-05	0.00279	0.00435	0.00838	0.03703	0.37	0.01696	0.02308	0.03455	0.05088	0.029885	17.715	0.69499	0.64095	0.28726
15.913	72	0	28.312	0.00614	6.82E-05	0.00268	0.00379	0.00803	0.03341	0.31	0.01702	0.02053	0.02715	0.05105	0.033489	17.74	0.59863	0.65748	0.26263
16.139	72	0	35.303	0.01055	0.00010833	0.00424	0.00455	0.01272	0.0337	0.308	0.01346	0.0179	0.03078	0.04037	0.04737	19.11	0.67272	0.60107	0.35553
16.365	72	0	42.301	0.00826	8.04E-05	0.00405	0.00473	0.01216	0.03686	0.331	0.01762	0.0213	0.03279	0.05286	0.058787	19.763	0.58076	0.59623	0.30461
16.623	72	0	50.298	0.00541	6.03E-05	0.00237	0.00371	0.00712	0.03757	0.328	0.02061	0.02319	0.02849	0.06184	0.02026	18.746	0.56296	0.65184	0.2611
16.662	72	0	51.537	0.00992	0.00010995	0.00461	0.00556	0.01382	0.04457	0.391	0.02002	0.0263	0.04022	0.06006	0.028808	17.556	0.68525	0.76253	0.3707
16.664	72	0	51.588	0.01034	0.00010709	0.00405	0.00551	0.01214	0.04687	0.422	0.02274	0.02919	0.04365	0.06822	0.044689	18.276	0.60372	0.66533	0.32802
16.816	72	0	56.306	0.0044	5.10E-05	0.00159	0.00253	0.00476	0.0398	0.375	0.01777	0.02321	0.03447	0.05331	0.025261	19.278	0.71503	0.60169	0.16909
17.042	72	0	63.297	0.00624	6.27E-05	0.0019	0.00309	0.00569	0.04005	0.35	0.0207	0.02374	0.03086	0.06211	0.030824	19.729	0.66925	0.59352	0.2255
17.268	72	0	70.295	0.00423	4.22E-05	0.0019	0.0027	0.0057	0.02139	0.178	0.01082	0.01322	0.01967	0.03245	0.014585	21.071	0.61406	0.58528	0.21117
17.493	72	0	77.297	0.00404	3.56E-05	0.00169	0.00228	0.00507	0.02475	0.243	0.01219	0.01526	0.02035	0.03656	0.01766	23.486	0.53338	0.57934	0.1903
17.719	72	0	84.301	0.00838	9.37E-05	0.00297	0.00493	0.00892	0.03835	0.334	0.01906	0.02562	0.03257	0.05719	0.039611	17.227	0.66725	0.60092	0.32293
17.945	72	0	91.302	0.00711	7.76E-05	0.00208	0.00296	0.00624	0.0257	0.244	0.01229	0.01457	0.02337	0.03688	0.029003	20.226	0.60173	0.5753	0.19895
17.681	72	0	98.299	0.00468	4.54E-05	0.00172	0.00227	0.00517	0.01974	0.174	0.00782	0.01164	0.01909	0.02347	0.019415	23.354	0.57616	0.57971	0.18794
17.259	72	0	105.3	0.00407	3.73E-05	0.00169	0.00234	0.00506	0.02647	0.229	0.01278	0.01702	0.0245	0.03834	0.012899	22.759	0.5315	0.57912	0.20233
16.837	72	0	112.3	0.00692	7.21E-05	0.0022	0.00344	0.00661	0.03901	0.342	0.01783	0.02297	0.04039	0.0535	0.027769	19.172	0.66005	0.57965	0.26039
16.416	72	0	119.3	0.00536	4.89E-05	0.00214	0.00292	0.00643	0.03332	0.298	0.01681	0.02	0.02854	0.05043	0.035802	21.462	0.57086	0.56998	0.23169
15.994	72	0	126.3	0.00605	6.02E-05	0.00194	0.00288	0.00581	0.02897	0.285	0.01288	0.0184	0.03147	0.03863	0.024426	20.112	0.65573	0.58944	0.26161
15.571	72	0	133.32	0.00399	3.83E-05	0.00154	0.00228	0.00462	0.02138	0.188	0.00962	0.01331	0.02072	0.02885	0.009184	22.737	0.46979	0.59728	0.18658
15.153	72	0	140.27	0.00516	4.94E-05	0.00227	0.00328	0.00682	0.03071	0.264	0.01502	0.01942	0.02766	0.04507	0.012274	21.408	0.61074	0.59384	0.26245
14.731	72	0	147.27	0.00459	4.10E-05	0.00158	0.00215	0.00475	0.03147	0.296	0.0136	0.0187	0.02904	0.04081	0.016645	22.81	0.51412	0.59093	0.16497
14.31	72	0	154.26	0.00398	3.89E-05	0.00173	0.00228	0.00519	0.0223	0.21	0.01115	0.01367	0.0179	0.03345	0.015983	23.308	0.47784	0.58746	0.15425
13.885	72	0	161.3	0.00768	7.53E-05	0.00416	0.00358	0.01247	0.02382	0.212	0.01156	0.01405	0.02102	0.03467	0.03762	21.526	0.56533	0.58193	0.31227
13.464	72	0	168.31	0.00361	3.33E-05	0.00144	0.0021	0.00433	0.02305	0.196	0.01155	0.01499	0.02178	0.03464	0.007384	24.001	0.56704	0.57314	0.16807
13.042	72	0	175.3	0.0034	3.15E-05	0.00133	0.00207	0.00399	0.0246	0.216	0.01155	0.0163	0.02279	0.03466	0.00759	23.617	0.47818	0.57766	0.16558
15.234	72	0	7.2583	0.0057	5.89E-05	0.00272	0.00299	0.00815	0.01886	0.164	0.00953	0.01148	0.01657	0.0286	0.019992	19.697	0.56853	0.61633	0.27016
15.461	72	0	14.303	0.004	4.35E-05	0.00134	0.00213	0.00403	0.02051	0.177	0.00987	0.01195	0.01824	0.0296	0.014784	20.622	0.62205	0.59093	0.16127
15.687	72	0	21.305	0.00587	6.36E-05	0.00234	0.00388	0.00701	0.03423	0.354	0.01973	0.02253	0.03286	0.05918	0.033909	18.123	0.62749	0.64479	0.30133
15.913	72	0	28.312	0.00648	6.93E-05	0.00255	0.00352	0.00765	0.04483	0.417	0.02269	0.02875	0.03466	0.06806	0.026903	18.554	0.60475	0.63834	0.22495
16.139	72	0	35.303	0.00436	4.39E-05	0.00131	0.00232	0.00394	0.02689	0.221	0.01246	0.01585	0.02331	0.03737	0.012867	23.496	0.59604	0.60225	0.16363
16.365	72	0	42.302	0.00335	3.32E-05	0.00148	0.00247	0.00444	0.0228	0.199	0.0118	0.01544	0.01985	0.0354	0.008789	22.522	0.52334	0.5907	0.1946
16.623	72	0	50.299	0.00596	6.39E-05	0.002	0.00341	0.00601	0.02371	0.211	0.01066	0.01279	0.02119	0.03197	0.024719	19.467	0.54982	0.61707	0.23017
16.662	72	0	51.537	0.00604	6.65E-05	0.00296	0.00368	0.00887	0.02917	0.257	0.01366	0.01717	0.02776	0.04099	0.017588	19.485	0.57151	0.72461	0.29777
16.664	72	0	51.588	0.00911	9.30E-05	0.00428	0.00466	0.01283	0.05196	0.457	0.0263	0.03117	0.04499	0.07889	0.03642	17.995	0.61912	0.65595	0.34001
16.816	72	0	56.307	0.00598	6.96E-05	0.00204	0.00245	0.00613	0.02615	0.259	0.00992	0.01449	0.02577	0.02975	0.023978	20.055	0.66908	0.58614	0.12253
17.042	72	0	63.297	0.00572	5.96E-05	0.002	0.00296	0.00601	0.04219	0.39	0.02232	0.02616	0.03109	0.06697	0.029754	18.975	0.65648	0.59798	0.24805
17.268	72	0	70.296	0.00506	5.46E-05	0.00197	0.00282	0.00592	0.02987	0.277	0.01399	0.01651	0.02786	0.04198	0.021188	18.702	0.61317	0.60164	0.22995
17.493	72	0	77.297	0.00584	5.33E-05	0.00177	0.0025	0.00531	0.02709	0.259	0.01204	0.01451	0.02541	0.03611	0.020491	23.04	0.54882	0.58287	0.20658
17.719	72	0	84.301	0.00732	8.35E-05	0.00277	0.00388	0.00831	0.03597	0.329	0.01849	0.02444	0.03123	0.05547	0.031003	17.993	0.65728	0.59693	0.26913
17.945	72	0	91.302	0.00354	3.86E-05	0.00157	0.00216	0.00472	0.01308	0.111	0.00634	0.0083	0.0141	0.01901	0.013482	20.384	0.5688	0.57065	0.18142
17.681	72	0	98.299	0.00546	5.50E-05	0.00201	0.00312	0.00602	0.02367	0.211	0.01162	0.01505	0.01939	0.03487	0.030654	21.936	0.57354	0.5667	0.21466
17.259	72	0	105.3	0.00625	5.74E-05	0.00199	0.00256	0.00597	0.03201	0.281	0.01455	0.0218	0.03145	0.04365	0.025234	21.836	0.61742	0.57934	0.24935
16.837	72	0	112.3	0.00703	7.14E-05	0.00299	0.00357	0.00896	0.02744	0.256	0.01304	0.01755	0.02245	0.03911	0.030947	21.646	0.5289	0.58	0.23037
16.416	72	0	119.3	0.00538	4.77E-05	0.00204	0.00266	0.00612	0.03372	0.319	0.01761	0.01984	0.02656	0.05282	0.023988	21.371	0.54486	0.56903	0.18276
15.994	72	0	126.3	0.00603	6.35E-05	0.00209	0.00357	0.00626	0.02993	0.27	0.01417	0.01809	0.02524	0.04252	0.023679	19.559	0.60614	0.59289	0.25212
15.571	72	0	133.32	0.00564	5.44E-05	0.00213	0.00308	0.00638	0.02511	0.223	0.0117	0.01398	0.02247	0.03509	0.027655	21.369	0.56621	0.59662	0.22492
15.153	72	0	140.27	0.00444	4.53E-05	0.00164	0.00282	0.00493	0.01942	0.171	0.00949	0.01182	0.01848	0.02848	0.017788	21.256	0.52211	0.59814	0.22701
14.731	72	0	147.27	0.00473	4.52E-05	0.0014	0.00231	0.0042	0.02457	0.225	0.00928	0.01464	0.02964	0.02783	0.013751	23.143	0.57113	0.59207	0.19707
14.31	72	0	154.26	0.00305	2.99E-05	0.00135	0.00188	0.00406	0.02041	0.174	0.01042	0.01341	0.01637	0.03126	0.006446	24.336	0.45083	0.59024	0.13203
13.885	72	0	161.3	0.00526	5.10E-05	0.00212	0.0029	0.00636	0.03229	0.299	0.01475	0.01991	0.03289	0.04425	0.01948	21.741	0.62397	0.59062	0.20228
13.463	72	0	168.31	0.00635	5.68E-05	0.00189	0.00264	0.00568	0.02109	0.207	0.00985	0.01228	0.01931	0.02955	0.028806	22.827	0.58733	0.56333	0.1847
13.042	72	0	175.3	0.00557	5.28E-05	0.00258	0.00283	0.00773	0.0241	0.222	0.01206	0.01386	0.02143	0.03619	0.025744	22.439	0.56546	0.58143	0.23462
15.234	72	0	7.259	0.00604	6.19E-05	0.00226	0.00262	0.00678	0.0236	0.207	0.01146	0.01453	0.0202	0.03439	0.020681	20.663	0.60982	0.60852	0.18617
15.461	72	0	14.303	0.00463	5.22E-05	0.00169	0.00261	0.00508	0.02266	0.196	0.01022	0.01421	0.02399	0.03065	0.018221	19.602	0.66326	0.58329	0.20155
15.687	72	0	21.306	0.00367	3.98E-05	0.00143	0.00214	0.0043	0.02384	0.212	0.01243	0.01417	0.01936	0.0373	0.013635	20.364	0.58459	0.61576	0.17753
15.913	72	0	28.313	0.00569	6.14E-05	0.00237	0.0032	0.00712	0.03144	0.28	0.01663	0.01826	0.02296	0.04988	0.026236	19.082	0.64388	0.62142	0.26012
16.139	72	0	35.304	0.00594	6.22E-05	0.00235	0.00249	0.00705	0.03012	0.272	0.01251	0.01831	0.03121	0.03754	0.033838	21.21	0.6468	0.59489	0.24898
16.365	72	0	42.302	0.0046	4.37E-05	0.00191	0.00272	0.00573	0.03471	0.287	0.01837	0.01985	0.02524	0.0551	0.017954	22.703	0.62443	0.58243	0.21999
16.623	72	0	50.299	0.00586	6.16E-05	0.00224	0.00269	0.00672	0.02726	0.24	0.01274	0.01685	0.02345	0.03823	0.01946	20.613	0.57011	0.61465	0.23718
16.662	72	0	51.537	0.00865	9.54E-05	0.00365	0.00477	0.01094	0.02995	0.263	0.01461	0.01877	0.023	0.04383	0.022892	18.595	0.6196	0.71161	0.33297
16.664	72	0	51.59	0.00654	7.13E-05	0.00214	0.0034	0.00643	0.03616	0.374	0.01684	0.01919	0.03261	0.05052	0.033096	18.204	0.60716	0.65217	0.30846
16.816	72	0	56.308	0.00521	5.73E-05	0.00143	0.00227	0.00429	0.03196	0.307	0.01459	0.01584	0.02431	0.04376	0.022856	19.517	0.65297	0.58461	0.15444
17.042	72	0	63.299	0.00677	7.12E-05	0.00269	0.00295	0.00807	0.02281	0.248	0.01096	0.01351	0.01963	0.03289	0.021229	19.881	0.63015	0.60145	0.23441
17.268	72	0	70.297	0.00683	7.56E-05	0.00254	0.00346	0.00763	0.03686	0.328	0.01775	0.02307	0.03446	0.05324	0.035682	18.307	0.64784	0.60483	0.24748
17.494	72	0	77.299	0.00391	3.79E-05	0.00157	0.00232	0.00471	0.02315	0.208	0.0112	0.01487	0.02242	0.0336	0.0154	22.548	0.60649	0.5741	0.19693
17.719	72	0	84.303	0.00524	6.04E-05	0.00219	0.00307	0.00657	0.02882	0.279	0.01365	0.01683	0.02661	0.04094	0.02457	18.938	0.61711	0.58763	0.22491
17.945	72	0	91.304	0.00386	4.38E-05	0.00142	0.00225	0.00425	0.024	0.208	0.01203	0.01468	0.02239	0.03608	0.017281	19.223	0.61187	0.58103	0.16647
17.681	72	0	98.301	0.00636	6.41E-05	0.00242	0.00381	0.00727	0.02596	0.241	0.01199	0.01722	0.02449	0.03597	0.025078	21.853	0.62154	0.56978	0.24361
17.259	72	0	105.3	0.00855	8.32E-05	0.0043	0.00431	0.01291	0.03227	0.301	0.01654	0.01784	0.02822	0.04962	0.063118	21.08	0.56016	0.58071	0.22944
16.837	72	0	112.3	0.00349	3.31E-05	0.00127	0.00208	0.00381	0.01767	0.154	0.00745	0.01049	0.01938	0.02234	0.006419	24.092	0.50386	0.56814	0.18013
16.415	72	0	119.3	0.01341	0.00011782	0.00737	0.00559	0.02211	0.02397	0.215	0.01269	0.01412	0.0201	0.03806	0.051968	22.125	0.59693	0.56507	0.3475
15.994	72	0	126.3	0.00386	3.72E-05	0.00176	0.00229	0.00527	0.02103	0.177	0.011	0.0133	0.01797	0.033	0.009713	23.364	0.5888	0.57695	0.20464
15.571	72	0	133.32	0.00499	4.70E-05	0.00176	0.00276	0.00529	0.03169	0.3	0.01615	0.02003	0.02761	0.04845	0.023617	22.227	0.49867	0.60655	0.21693
15.153	72	0	140.27	0.00509	5.64E-05	0.00199	0.00278	0.00596	0.03956	0.365	0.02167	0.02471	0.03058	0.06502	0.025167	18.093	0.5821	0.6266	0.18486
14.731	72	0	147.27	0.00679	6.92E-05	0.00234	0.00359	0.00701	0.02252	0.261	0.01005	0.01318	0.02292	0.03015	0.044022	22.079	0.52645	0.5882	0.18382
14.309	72	0	154.26	0.00444	4.00E-05	0.00189	0.00253	0.00566	0.02109	0.196	0.00889	0.01134	0.01606	0.02666	0.014975	24.188	0.52693	0.58175	0.19032
13.885	72	0	161.3	0.00359	3.25E-05	0.00153	0.00209	0.00459	0.02561	0.224	0.01301	0.01548	0.02827	0.03902	0.008025	24.009	0.46532	0.57239	0.17336
13.463	72	0	168.31	0.00432	4.04E-05	0.00186	0.00254	0.00559	0.02656	0.229	0.01309	0.0166	0.02792	0.03926	0.009017	22.887	0.50903	0.57868	0.22688
13.042	72	0	175.3	0.00838	8.69E-05	0.00361	0.00401	0.01082	0.02881	0.265	0.01461	0.01783	0.02591	0.04384	0.032315	20.135	0.54141	0.59484	0.31333
15.234	72	0	7.2604	0.00825	8.71E-05	0.00331	0.00461	0.00992	0.03484	0.339	0.01624	0.02082	0.03272	0.04871	0.032506	19.082	0.55065	0.62229	0.30278
15.461	72	0	14.306	0.00808	7.99E-05	0.00372	0.00404	0.01117	0.03091	0.29	0.01412	0.01517	0.02125	0.04236	0.049127	19.509	0.59827	0.59685	0.29365
15.687	72	0	21.307	0.00687	7.21E-05	0.00339	0.00357	0.01017	0.02248	0.186	0.01246	0.0143	0.01677	0.03738	0.035184	20.161	0.56545	0.61314	0.33558
15.913	72	0	28.314	0.00613	6.69E-05	0.0027	0.0032	0.0081	0.02187	0.186	0.01079	0.01296	0.01707	0.03238	0.021474	19.174	0.57101	0.6316	0.25744
16.139	72	0	35.306	0.00334	3.46E-05	0.001	0.00202	0.003	0.01371	0.119	0.00568	0.00739	0.01457	0.01705	0.008431	22.396	0.5467	0.5883	0.14934
16.365	72	0	42.304	0.00586	6.32E-05	0.00205	0.00308	0.00615	0.02252	0.233	0.01035	0.01228	0.01883	0.03104	0.01823	20.344	0.5566	0.60214	0.19792
16.623	72	0	50.301	0.00586	6.45E-05	0.0023	0.00285	0.0069	0.02474	0.23	0.01127	0.01502	0.02223	0.03382	0.030031	19.22	0.60074	0.62016	0.28222
16.663	72	0	51.539	0.0115	0.00012307	0.00629	0.00523	0.01886	0.031	0.299	0.01501	0.01889	0.02569	0.04503	0.03818	18.084	0.62336	0.64998	0.34314
16.816	72	0	56.309	0.0067	6.03E-05	0.00267	0.00344	0.008	0.03871	0.334	0.01952	0.02386	0.02937	0.05855	0.058288	20.301	0.62138	0.56444	0.25852
17.042	72	0	63.299	0.01279	0.00012821	0.00702	0.00645	0.02107	0.0335	0.319	0.01593	0.01913	0.02807	0.04779	0.055323	19.261	0.6282	0.58027	0.42806
17.268	72	0	70.298	0.00789	7.66E-05	0.00333	0.00364	0.00999	0.0342	0.315	0.01688	0.02197	0.02714	0.05065	0.048822	20.339	0.57962	0.57977	0.27259
17.494	72	0	77.299	0.00364	3.51E-05	0.00165	0.00219	0.00494	0.01797	0.155	0.00907	0.01185	0.01597	0.02722	0.009344	23.746	0.47321	0.57912	0.18223
17.719	72	0	84.303	0.00845	8.67E-05	0.0038	0.00287	0.01139	0.03579	0.341	0.01683	0.02088	0.0351	0.05049	0.045591	18.553	0.65461	0.57819	0.33514
17.945	72	0	91.304	0.00334	3.37E-05	0.00115	0.00175	0.00346	0.01685	0.143	0.00713	0.01029	0.01867	0.02139	0.008728	23.327	0.59264	0.5601	0.18161
17.681	72	0	98.301	0.00474	4.36E-05	0.00206	0.00264	0.00618	0.03406	0.301	0.01816	0.02141	0.02771	0.05448	0.019648	21.66	0.52496	0.57213	0.21712
17.259	72	0	105.3	0.0043	4.04E-05	0.00151	0.00258	0.00452	0.02765	0.243	0.01558	0.0161	0.02237	0.04673	0.010789	22.044	0.49698	0.57879	0.24468
16.837	72	0	112.3	0.00851	7.94E-05	0.00319	0.00339	0.00958	0.03419	0.34	0.01684	0.01858	0.02723	0.05051	0.034662	20.607	0.57715	0.57535	0.29855
16.415	72	0	119.3	0.00956	8.27E-05	0.00521	0.00447	0.01562	0.04352	0.368	0.02351	0.02378	0.03274	0.07053	0.042144	21.093	0.6492	0.56312	0.33725
15.994	72	0	126.3	0.00571	5.14E-05	0.00212	0.003	0.00637	0.03502	0.316	0.01841	0.02304	0.03478	0.05524	0.031867	19.831	0.56527	0.58497	0.2651
15.571	72	0	133.32	0.00544	4.97E-05	0.00275	0.00296	0.00824	0.02875	0.252	0.01406	0.01865	0.02812	0.04218	0.037685	21.588	0.55268	0.60589	0.24473
15.153	72	0	140.27	0.00478	4.44E-05	0.00199	0.00245	0.00596	0.0443	0.401	0.02195	0.02941	0.03442	0.06586	0.031515	20.445	0.64032	0.58333	0.2099
14.731	72	0	147.27	0.00503	4.59E-05	0.00226	0.0029	0.00678	0.02857	0.264	0.01355	0.0154	0.02509	0.04064	0.018437	22.72	0.50169	0.59328	0.17861
14.309	72	0	154.26	0.00606	5.73E-05	0.00202	0.00269	0.00607	0.02717	0.265	0.01172	0.0167	0.02473	0.03517	0.030448	21.493	0.53101	0.58051	0.21652
13.885	72	0	161.3	0.00645	5.71E-05	0.00235	0.00262	0.00706	0.03415	0.313	0.01621	0.02077	0.0351	0.04863	0.029627	21.018	0.60375	0.57466	0.26451
13.463	72	0	168.31	0.00665	5.33E-05	0.00239	0.00305	0.00718	0.02306	0.224	0.01132	0.01301	0.01935	0.03397	0.036381	22.048	0.58409	0.55758	0.24499
13.042	72	0	175.3	0.00803	7.45E-05	0.00362	0.00499	0.01085	0.03943	0.352	0.0188	0.02601	0.03572	0.05639	0.058686	21.493	0.56436	0.58201	0.24025
15.234	72	0	7.2611	0.00759	7.50E-05	0.00391	0.00397	0.01174	0.03402	0.306	0.01628	0.02018	0.0292	0.04883	0.038174	18.018	0.64107	0.60619	0.31114
15.461	72	0	14.306	0.00529	5.44E-05	0.00201	0.0029	0.00604	0.02382	0.21	0.01254	0.01471	0.01928	0.03761	0.025946	20.051	0.67486	0.59966	0.2246
15.687	72	0	21.308	0.00488	4.31E-05	0.00194	0.003	0.00582	0.04624	0.402	0.02409	0.02776	0.03525	0.07227	0.025997	20.109	0.6176	0.60302	0.2373
15.913	72	0	28.315	0.00312	3.10E-05	0.00128	0.00216	0.00384	0.02683	0.246	0.01486	0.01746	0.02216	0.04457	0.009161	22.588	0.65586	0.6087	0.16664
16.139	72	0	35.306	0.00482	4.74E-05	0.00137	0.00223	0.00411	0.02279	0.214	0.01216	0.01284	0.01929	0.03648	0.021949	21.842	0.67056	0.60266	0.16422
16.365	72	0	42.304	0.01134	0.00010267	0.00641	0.00643	0.01923	0.03287	0.29	0.01767	0.01977	0.02596	0.05302	0.096824	19.036	0.6198	0.58676	0.31138
16.623	72	0	50.301	0.00587	5.46E-05	0.00215	0.00308	0.00645	0.03121	0.291	0.01499	0.01814	0.02322	0.04497	0.027997	21.214	0.52511	0.58654	0.21624
16.663	72	0	51.54	0.01123	0.00010836	0.0063	0.00585	0.0189	0.04999	0.43	0.02691	0.02963	0.04176	0.08073	0.053117	17.806	0.69533	0.6151	0.40547
16.664	72	0	51.59	0.00877	8.88E-05	0.00442	0.00492	0.01325	0.04861	0.426	0.02299	0.0293	0.04431	0.06897	0.045573	18.366	0.66851	0.63748	0.38805
16.816	72	0	56.31	0.00326	3.20E-05	0.00097	0.00159	0.00291	0.02564	0.23	0.01156	0.01382	0.02201	0.03468	0.013582	24.17	0.58038	0.5666	0.13161
17.042	72	0	63.3	0.00672	6.38E-05	0.00227	0.00314	0.00682	0.03394	0.304	0.0163	0.01937	0.02578	0.0489	0.026158	20.703	0.64635	0.58072	0.22059
17.268	72	0	70.298	0.00583	5.43E-05	0.00205	0.00248	0.00615	0.02421	0.233	0.0105	0.01391	0.02116	0.03149	0.020072	22.198	0.6041	0.57017	0.20461
17.494	72	0	77.3	0.00513	4.42E-05	0.00143	0.00224	0.00428	0.02338	0.219	0.01177	0.01462	0.02069	0.03531	0.024615	22.545	0.55252	0.57707	0.16958
17.719	72	0	84.304	0.00862	8.67E-05	0.00417	0.00464	0.0125	0.04153	0.41	0.0183	0.02431	0.03733	0.0549	0.039189	18.669	0.65942	0.57641	0.34792
17.945	72	0	91.305	0.00631	6.61E-05	0.00206	0.00235	0.00618	0.02926	0.297	0.01397	0.0154	0.02259	0.04192	0.026316	20.34	0.64603	0.56849	0.18409
17.681	72	0	98.302	0.00554	5.36E-05	0.00189	0.00291	0.00567	0.03522	0.317	0.01788	0.01925	0.02933	0.05364	0.019552	21.649	0.60678	0.57173	0.22329
17.259	72	0	105.3	0.00498	4.67E-05	0.00193	0.00286	0.00579	0.03117	0.277	0.01698	0.01873	0.02389	0.05093	0.019641	21.73	0.4931	0.57639	0.21008
16.837	72	0	112.3	0.00593	5.17E-05	0.00205	0.00275	0.00616	0.03686	0.325	0.02033	0.02237	0.02824	0.06099	0.038174	21.045	0.54153	0.57067	0.22561
16.415	72	0	119.3	0.00584	4.92E-05	0.00183	0.00222	0.00548	0.03349	0.3	0.01896	0.01972	0.02743	0.05689	0.03821	21.603	0.5832	0.56199	0.18352
15.994	72	0	126.3	0.00402	3.66E-05	0.00138	0.00225	0.00413	0.03133	0.278	0.01621	0.01988	0.023	0.04862	0.01666	22.997	0.49592	0.59137	0.16827
15.571	72	0	133.32	0.0082	7.04E-05	0.0037	0.00372	0.0111	0.05148	0.48	0.0271	0.0296	0.04766	0.08131	0.035492	19.034	0.63385	0.59461	0.25417
15.153	72	0	140.27	0.00504	4.67E-05	0.00229	0.00318	0.00688	0.03944	0.362	0.021	0.02167	0.03175	0.06301	0.017045	22.26	0.52897	0.59057	0.20725
14.731	72	0	147.27	0.00591	5.10E-05	0.00225	0.003	0.00676	0.03179	0.298	0.01527	0.01889	0.03165	0.04581	0.026877	22.064	0.59397	0.57777	0.19225
14.309	72	0	154.26	0.0083	7.58E-05	0.00349	0.00368	0.01048	0.02937	0.296	0.01543	0.01718	0.02236	0.04629	0.036916	21.719	0.56122	0.57779	0.15503
13.885	72	0	161.3	0.00442	3.94E-05	0.00183	0.00235	0.00548	0.03175	0.299	0.01595	0.01952	0.02803	0.04785	0.025288	22.543	0.54627	0.56792	0.19394
13.463	72	0	168.31	0.00527	4.37E-05	0.00168	0.00229	0.00504	0.02262	0.233	0.00978	0.01337	0.02382	0.02935	0.018019	23.73	0.50677	0.5572	0.20507
13.042	72	0	175.3	0.0062	5.67E-05	0.00236	0.00264	0.00707	0.031	0.307	0.01551	0.01846	0.02583	0.04653	0.038397	21.472	0.56955	0.58009	0.23855
15.234	72	0	7.2611	0.01065	0.00010322	0.00467	0.00589	0.01402	0.03933	0.383	0.01969	0.02498	0.0352	0.05907	0.040348	19.121	0.65765	0.60304	0.32166
15.461	72	0	14.306	0.00531	5.51E-05	0.00178	0.00238	0.00534	0.02864	0.267	0.01396	0.01624	0.02182	0.04187	0.021833	20.626	0.70845	0.60337	0.2356
15.687	72	0	21.308	0.00446	4.21E-05	0.00162	0.00225	0.00485	0.03003	0.274	0.01544	0.01782	0.02374	0.04633	0.016607	22.251	0.57616	0.59647	0.22385
15.913	72	0	28.315	0.00516	5.09E-05	0.00252	0.0032	0.00757	0.03752	0.334	0.0172	0.0238	0.02677	0.0516	0.023851	20.71	0.66228	0.62393	0.24443
16.139	72	0	35.307	0.00481	4.34E-05	0.00144	0.00239	0.00431	0.02601	0.242	0.01095	0.01415	0.02735	0.03285	0.02256	22.709	0.57791	0.57833	0.17465
16.365	72	0	42.305	0.00868	7.82E-05	0.00432	0.00391	0.01297	0.02753	0.238	0.01367	0.01621	0.02094	0.041	0.052969	21.636	0.61227	0.589	0.36683
16.623	72	0	50.301	0.00522	5.00E-05	0.00197	0.00296	0.00591	0.02626	0.239	0.01283	0.01567	0.02368	0.03848	0.018941	21.999	0.56771	0.59733	0.19569
16.663	72	0	51.54	0.0074	7.87E-05	0.00289	0.00403	0.00866	0.03861	0.349	0.01922	0.02448	0.0325	0.05766	0.02814	18.561	0.62262	0.65295	0.25549
18.093	73	1	8.5951	0.00508	2.71E-05	0.00268	0.00279	0.00805	0.04755	0.424	0.02559	0.02831	0.03348	0.07678	0.025365	19.363	0.64008	0.70365	0.20803
18.169	73	1	15.548	0.0087	4.74E-05	0.00462	0.00441	0.01387	0.04736	0.449	0.0269	0.02956	0.0327	0.08071	0.046591	19.606	0.56726	0.72053	0.18637
18.246	73	1	22.593	0.0054	3.14E-05	0.00229	0.0026	0.00688	0.03349	0.306	0.01739	0.01957	0.02737	0.05217	0.028065	19.002	0.63515	0.71451	0.27613
18.322	73	1	29.596	0.00425	2.38E-05	0.00218	0.00229	0.00655	0.04701	0.413	0.02552	0.02877	0.03572	0.07656	0.019043	18.876	0.56773	0.71409	0.1919
18.397	73	1	36.567	0.0036	2.03E-05	0.00152	0.00168	0.00457	0.0348	0.319	0.01818	0.02006	0.02664	0.05454	0.015952	21.696	0.57401	0.67361	0.20149
18.474	73	1	43.597	0.00397	2.26E-05	0.00203	0.00222	0.0061	0.03589	0.329	0.01916	0.02138	0.02468	0.05747	0.050604	21.039	0.60573	0.67182	0.22508
18.55	73	1	50.606	0.00419	2.41E-05	0.00214	0.00234	0.00641	0.04406	0.4	0.02439	0.02623	0.03194	0.07318	0.019287	18.691	0.54894	0.74193	0.18245
18.626	73	1	57.591	0.00401	2.19E-05	0.00209	0.00213	0.00626	0.03353	0.294	0.01842	0.02023	0.02567	0.05525	0.016761	21.687	0.50864	0.73305	0.19402
18.702	73	1	64.594	0.00346	1.99E-05	0.00152	0.00169	0.00456	0.03528	0.325	0.01902	0.02083	0.02608	0.05707	0.011805	20.452	0.60617	0.70653	0.19211
18.778	73	1	71.594	0.00291	1.62E-05	0.00141	0.00162	0.00422	0.03882	0.334	0.02029	0.02378	0.02969	0.06086	0.007772	21.99	0.59776	0.72225	0.16528
18.854	73	1	78.601	0.0038	2.18E-05	0.00183	0.00197	0.00548	0.03917	0.341	0.02076	0.02325	0.02939	0.06228	0.018663	20.306	0.63814	0.7119	0.20004
18.93	73	1	85.588	0.00627	3.22E-05	0.00359	0.00327	0.01076	0.03979	0.345	0.01868	0.02088	0.01625	0.05605	0.044557	20.466	0.59596	0.65103	0.21037
19.029	73	1	92.651	0.00282	1.56E-05	0.00147	0.00161	0.00441	0.02625	0.232	0.01295	0.01559	0.02316	0.03884	0.009643	20.541	0.57097	0.69126	0.15523
19.642	73	1	106.6	0.00299	1.65E-05	0.00154	0.00167	0.00462	0.04627	0.422	0.02492	0.02819	0.03571	0.07477	0.009451	21.477	0.47769	0.7114	0.1413
19.947	73	1	113.55	0.00495	2.71E-05	0.00281	0.00284	0.00842	0.05423	0.524	0.02598	0.02931	0.03896	0.07795	0.022851	20.127	0.61993	0.7037	0.195
20.255	73	1	120.55	0.00318	1.88E-05	0.0015	0.00172	0.00449	0.02832	0.246	0.01527	0.01762	0.02328	0.0458	0.008666	21.727	0.54404	0.72279	0.16045
20.565	73	1	127.59	0.00563	3.24E-05	0.00307	0.0026	0.00922	0.04526	0.401	0.02495	0.02546	0.03096	0.07486	0.031201	18.833	0.55272	0.70743	0.1799
20.871	73	1	134.56	0.00425	2.43E-05	0.00205	0.00203	0.00614	0.03575	0.317	0.01793	0.02175	0.02829	0.05379	0.016528	21.988	0.61483	0.69428	0.18053
21.181	73	1	141.62	0.00533	2.80E-05	0.00297	0.00306	0.00891	0.03191	0.292	0.01575	0.01923	0.02661	0.04726	0.022167	23.183	0.53234	0.69971	0.18678
21.486	73	1	148.56	0.00987	7.66E-05	0.00576	0.00593	0.01729	0.12542	1.132	0.065	0.08347	0.10272	0.19499	0.10707	12.158	0.70502	0.64976	0.30255
21.793	73	1	155.55	0.00275	1.42E-05	0.00136	0.00146	0.00407	0.02864	0.241	0.01464	0.01715	0.02165	0.04391	0.014635	23.094	0.61652	0.67006	0.11648
22.104	73	1	162.61	0.00249	1.33E-05	0.00109	0.00139	0.00327	0.02615	0.247	0.01386	0.01565	0.02118	0.04159	0.005873	23.418	0.56137	0.65299	0.15348
22.411	73	1	169.6	0.00255	1.36E-05	0.00126	0.00144	0.00379	0.02652	0.225	0.01407	0.01631	0.02251	0.04221	0.009016	23.408	0.55889	0.69628	0.13868
22.719	73	1	176.6	0.00332	1.78E-05	0.00153	0.00179	0.0046	0.03285	0.288	0.01734	0.01966	0.02641	0.05202	0.017185	22.912	0.48235	0.7151	0.14289
23.031	73	1	183.69	0.00478	2.46E-05	0.00225	0.00278	0.00676	0.0304	0.262	0.01619	0.01849	0.02391	0.04857	0.022544	21.798	0.54349	0.69211	0.2023
18.093	73	1	8.5951	0.00575	3.27E-05	0.00275	0.00256	0.00825	0.03629	0.33	0.01829	0.02293	0.03231	0.05488	0.02009	20.228	0.57708	0.69182	0.18427
18.169	73	1	15.549	0.00369	1.99E-05	0.00164	0.0019	0.00492	0.03127	0.269	0.0154	0.01667	0.02855	0.04619	0.017438	20.363	0.54023	0.7039	0.21313
18.246	73	1	22.594	0.00441	2.51E-05	0.0018	0.00228	0.00541	0.04148	0.36	0.02069	0.02385	0.03502	0.06208	0.025305	18.671	0.63555	0.71124	0.20841
18.322	73	1	29.596	0.00358	1.97E-05	0.00195	0.00181	0.00586	0.03165	0.274	0.01612	0.01921	0.02589	0.04837	0.03319	20.985	0.53987	0.67895	0.18138
18.397	73	1	36.567	0.00244	1.34E-05	0.00121	0.00147	0.00362	0.01903	0.162	0.01025	0.01175	0.0155	0.03076	0.004892	24.035	0.5598	0.66221	0.16017
18.474	73	1	43.597	0.0025	1.26E-05	0.00115	0.00123	0.00345	0.01641	0.146	0.00852	0.00896	0.01312	0.02555	0.00875	26.146	0.55496	0.61569	0.12108
18.55	73	1	50.607	0.00497	2.61E-05	0.00218	0.00276	0.00654	0.02728	0.239	0.0146	0.01693	0.02032	0.0438	0.03617	22.747	0.43053	0.67613	0.20505
18.626	73	1	57.591	0.00326	1.79E-05	0.00159	0.00187	0.00478	0.02374	0.215	0.01318	0.01426	0.01608	0.03954	0.02943	22.936	0.42862	0.68664	0.20582
18.702	73	1	64.595	0.0029	1.47E-05	0.00125	0.0014	0.00376	0.02402	0.215	0.01218	0.01367	0.01957	0.03653	0.012729	23.622	0.49878	0.63831	0.15407
18.778	73	1	71.594	0.00268	1.37E-05	0.00138	0.00134	0.00413	0.02146	0.189	0.01039	0.01263	0.01833	0.03116	0.012866	25.374	0.4861	0.6622	0.14008
18.854	73	1	78.601	0.02376	0.000138	0.01514	0.01441	0.04542	0.12951	1.151	0.07659	0.07682	0.07906	0.22978	0.25697	7.496	0.71242	0.64484	0.32938
18.93	73	1	85.588	0.00339	1.74E-05	0.00178	0.00183	0.00533	0.02571	0.252	0.01311	0.01491	0.01858	0.03933	0.027526	24.39	0.43389	0.64541	0.20944
19.029	73	1	92.651	0.00338	1.79E-05	0.0016	0.00172	0.00479	0.02996	0.263	0.01545	0.01708	0.02491	0.04634	0.014972	21.816	0.57657	0.65952	0.15905
19.642	73	1	106.6	0.00308	1.59E-05	0.0016	0.00177	0.00481	0.02399	0.211	0.01241	0.01428	0.01954	0.03723	0.008004	24.349	0.41437	0.65374	0.1553
19.947	73	1	113.55	0.07183	0.00036383	0.04356	0.04744	0.13068	0.16993	1.548	0.08442	0.11389	0.0956	0.25326	0.72537	2.206	0.8267	0.63404	0.43811
20.255	73	1	120.55	0.00565	3.09E-05	0.00315	0.00307	0.00945	0.03645	0.301	0.01979	0.02233	0.02229	0.05938	0.031449	20.888	0.48535	0.6502	0.20294
20.565	73	1	127.59	0.01692	8.64E-05	0.00907	0.01014	0.02722	0.06423	0.583	0.02392	0.03099	0.04943	0.07176	0.1426	15.727	0.63883	0.6225	0.43609
20.871	73	1	134.56	0.04485	0.0002205	0.028	0.02757	0.08399	0.14591	1.25	0.08435	0.11355	0.11094	0.25305	0.49001	4.574	0.75983	0.61301	0.427
21.181	73	1	141.62	0.00176	8.45E-06	0.00086	0.00093	0.00258	0.00855	0.073	0.00418	0.00498	0.00771	0.01254	0.002167	29.383	0.33751	0.60936	0.10562
21.486	73	1	148.56	0.00349	1.61E-05	0.00195	0.00194	0.00586	0.02356	0.254	0.01057	0.01316	0.02151	0.03172	0.008311	26.048	0.37602	0.64891	0.12917
21.793	73	1	155.55	0.00383	1.99E-05	0.00184	0.00204	0.00553	0.02609	0.239	0.01276	0.01447	0.02108	0.03827	0.012556	23.194	0.58856	0.63983	0.15553
22.104	73	1	162.61	0.00319	1.75E-05	0.0014	0.00152	0.00419	0.01969	0.193	0.00994	0.01186	0.01634	0.02981	0.025368	24.133	0.54047	0.62628	0.18905
22.411	73	1	169.6	0.00394	2.00E-05	0.00196	0.00192	0.00589	0.03006	0.267	0.01553	0.01807	0.02596	0.04659	0.008869	24.402	0.40606	0.64659	0.1366
22.719	73	1	176.6	0.0068	4.14E-05	0.00307	0.00353	0.00921	0.04972	0.467	0.02443	0.0274	0.04175	0.07329	0.039229	19.202	0.50223	0.62437	0.25736
23.031	73	1	183.7	0.0044	2.29E-05	0.00232	0.00245	0.00696	0.02826	0.244	0.01347	0.01686	0.02564	0.0404	0.029873	21.828	0.57525	0.65058	0.17626
18.093	73	1	8.5958	0.00399	2.54E-05	0.00166	0.00225	0.00499	0.03484	0.301	0.01875	0.01967	0.02525	0.05625	0.02088	19.964	0.54875	0.6927	0.22412
18.169	73	1	15.549	0.0061	3.29E-05	0.00324	0.00285	0.00972	0.03566	0.336	0.01951	0.01887	0.02575	0.05854	0.043875	19.109	0.61556	0.67686	0.20977
18.246	73	1	22.594	0.00315	1.75E-05	0.0016	0.00181	0.0048	0.02291	0.202	0.01132	0.01401	0.01793	0.03397	0.011967	22.677	0.59089	0.67498	0.14337
18.322	73	1	29.597	0.0015	6.99E-06	0.00064	0.00079	0.00191	0.01059	0.092	0.00486	0.0059	0.01051	0.01459	0.001557	30.689	0.35697	0.58845	0.10562
18.397	73	1	36.567	0.00576	3.01E-05	0.00324	0.00301	0.00973	0.05031	0.461	0.0276	0.02867	0.04085	0.08281	0.026015	19.439	0.61788	0.63533	0.21731
18.474	73	1	43.597	0.00692	3.67E-05	0.0037	0.00356	0.0111	0.02829	0.233	0.01435	0.01631	0.02068	0.04304	0.050858	22.757	0.50887	0.62647	0.23389
18.55	73	1	50.607	0.00284	1.53E-05	0.00149	0.00158	0.00446	0.02104	0.183	0.01141	0.01354	0.01648	0.03423	0.005434	23.926	0.34065	0.68192	0.15998
18.626	73	1	57.592	0.0044	2.40E-05	0.00193	0.00213	0.0058	0.03941	0.362	0.01966	0.02178	0.03473	0.05897	0.048851	22.984	0.49429	0.66648	0.19513
18.702	73	1	64.595	0.04465	0.00021581	0.028	0.02773	0.08399	0.15058	1.346	0.07866	0.10877	0.09967	0.23599	0.40118	5.455	0.72735	0.60892	0.29605
18.778	73	1	71.594	0.00231	1.23E-05	0.00106	0.00116	0.00318	0.02203	0.192	0.01032	0.01201	0.02199	0.03097	0.003818	25.797	0.4152	0.67068	0.13229
18.854	73	1	78.602	0.02445	0.00012698	0.01495	0.01467	0.04484	0.08585	0.787	0.04687	0.05583	0.05769	0.14062	0.25034	10.92	0.61033	0.63279	0.40162
18.93	73	1	85.589	0.00988	5.02E-05	0.0059	0.00527	0.01769	0.05267	0.501	0.02788	0.03344	0.04356	0.08363	0.052454	18.453	0.44992	0.62664	0.21606
19.029	73	1	92.652	0.00343	1.73E-05	0.00158	0.00174	0.00474	0.02201	0.201	0.01031	0.01338	0.02026	0.03092	0.011904	23.973	0.49407	0.61417	0.16862
19.642	73	1	106.6	0.02234	0.00011132	0.01343	0.01455	0.04029	0.05271	0.508	0.01788	0.02486	0.02668	0.05365	0.19988	12.99	0.60972	0.60923	0.41011
19.947	73	1	113.55	0.04132	0.00017535	0.02166	0.03059	0.06499	0.14614	1.314	0.06007	0.07562	0.08751	0.1802	0.49762	6.466	0.82344	0.62168	0.60333
20.255	73	1	120.55	0.00254	1.28E-05	0.00106	0.00113	0.00318	0.01771	0.159	0.00872	0.0106	0.01618	0.02615	0.007742	25.821	0.44617	0.62054	0.15657
20.565	73	1	127.59	0.04094	0.00018534	0.02213	0.02511	0.0664	0.12804	1.268	0.04986	0.07585	0.09918	0.14959	0.36121	8.536	0.79473	0.60519	0.59589
20.871	73	1	134.56	0.0416	0.00018907	0.0248	0.02668	0.0744	0.12726	1.136	0.05857	0.07655	0.0642	0.1757	0.44806	7.172	0.81875	0.60467	0.64669
21.181	73	1	141.62	0.01421	6.28E-05	0.00622	0.00796	0.01866	0.02855	0.332	0.01186	0.01685	0.02608	0.03558	0.17948	19.881	0.57427	0.60436	0.43935
21.486	73	1	148.56	0.02634	0.00011682	0.01587	0.01557	0.04762	0.06698	0.666	0.02917	0.04536	0.04264	0.08751	0.20089	15.659	0.58707	0.59834	0.30978
21.793	73	1	155.55	0.00223	1.13E-05	0.00076	0.00105	0.00227	0.0155	0.136	0.00709	0.00882	0.01557	0.02126	0.007816	25.946	0.4818	0.59854	0.14571
22.104	73	1	162.61	0.00347	1.67E-05	0.00169	0.00182	0.00506	0.01592	0.16	0.00797	0.00945	0.01267	0.02391	0.020583	26.878	0.40636	0.60532	0.12996
22.411	73	1	169.6	0.00409	1.96E-05	0.00217	0.00221	0.00652	0.01474	0.135	0.00662	0.00762	0.01277	0.01987	0.016154	24.629	0.4039	0.60306	0.15706
22.719	73	1	176.6	0.00226	1.12E-05	0.00083	0.00102	0.0025	0.01148	0.103	0.00577	0.00629	0.01054	0.0173	0.004511	27.095	0.43453	0.61158	0.11508
23.031	73	1	183.7	0.00211	1.06E-05	0.001	0.00112	0.00301	0.01522	0.14	0.00738	0.00881	0.0135	0.02215	0.003069	26.307	0.51462	0.62476	0.12342
18.093	73	1	8.5972	0.00475	2.38E-05	0.00241	0.0023	0.00723	0.03456	0.309	0.01897	0.02239	0.02482	0.05691	0.023817	21.466	0.57538	0.65313	0.18128
18.169	73	1	15.551	0.00461	2.58E-05	0.00236	0.00249	0.00708	0.03804	0.363	0.01872	0.02205	0.02775	0.05616	0.014666	20.331	0.63116	0.66863	0.19982
18.246	73	1	22.595	0.00337	1.82E-05	0.00168	0.00174	0.00505	0.04446	0.417	0.02358	0.02712	0.03475	0.07073	0.011765	22.086	0.49516	0.70211	0.15355
18.322	73	1	29.598	0.00911	4.40E-05	0.00542	0.00494	0.01625	0.0343	0.345	0.01746	0.01949	0.02148	0.05237	0.058706	23.218	0.5529	0.62816	0.22528
18.397	73	1	36.569	0.00303	1.58E-05	0.00143	0.00161	0.00428	0.02474	0.219	0.0124	0.01385	0.01834	0.0372	0.01056	22.814	0.55924	0.65925	0.13165
18.474	73	1	43.599	0.00306	1.57E-05	0.00152	0.00159	0.00457	0.02186	0.195	0.01177	0.01169	0.01562	0.03531	0.012732	23.277	0.38353	0.6313	0.14623
18.55	73	1	50.609	0.00711	3.61E-05	0.00394	0.00407	0.01182	0.02644	0.245	0.01418	0.01496	0.01973	0.04253	0.03756	20.784	0.47518	0.66729	0.169
18.626	73	1	57.593	0.00319	1.59E-05	0.00148	0.00172	0.00443	0.02749	0.275	0.01372	0.01643	0.02165	0.04115	0.012879	22.741	0.46136	0.6604	0.1894
18.702	73	1	64.597	0.004	2.10E-05	0.00197	0.00209	0.0059	0.03681	0.314	0.01896	0.02216	0.0336	0.05688	0.023585	20.555	0.51352	0.6696	0.18795
18.778	73	1	71.596	0.00247	1.31E-05	0.00108	0.00126	0.00325	0.02674	0.238	0.01382	0.01563	0.02079	0.04145	0.006322	22.933	0.56859	0.66977	0.16664
18.854	73	1	78.603	0.00478	2.66E-05	0.00255	0.00266	0.00765	0.0303	0.282	0.01647	0.01767	0.02407	0.04941	0.017335	20.631	0.53101	0.67723	0.16416
18.93	73	1	85.59	0.00295	1.60E-05	0.00138	0.00154	0.00415	0.02788	0.25	0.01378	0.01582	0.02327	0.04134	0.009213	21.274	0.51151	0.68833	0.16647
19.029	73	1	92.653	0.0026	1.35E-05	0.00124	0.00141	0.00373	0.0305	0.277	0.01512	0.01749	0.02586	0.04535	0.006753	22.529	0.54922	0.6591	0.13589
19.642	73	1	106.6	0.00318	1.75E-05	0.00165	0.00174	0.00495	0.03012	0.275	0.01468	0.01662	0.02348	0.04405	0.007619	21.896	0.47125	0.67397	0.15182
19.947	73	1	113.56	0.00339	1.82E-05	0.00169	0.00165	0.00508	0.02361	0.203	0.01247	0.01394	0.01995	0.03742	0.00773	22.256	0.54082	0.66166	0.1386
20.255	73	1	120.55	0.00346	1.87E-05	0.00189	0.00188	0.00568	0.02042	0.173	0.01105	0.01173	0.0156	0.03316	0.008148	22.187	0.52245	0.67575	0.15161
20.565	73	1	127.6	0.00401	2.07E-05	0.00205	0.00212	0.00616	0.03258	0.292	0.01777	0.01901	0.02221	0.05331	0.016785	20.953	0.52248	0.65356	0.19139
20.871	73	1	134.57	0.00191	9.40E-06	0.00086	0.00097	0.00258	0.01311	0.115	0.00628	0.00706	0.01202	0.01883	0.003831	27.573	0.42112	0.60133	0.10835
21.181	73	1	141.62	0.00252	1.24E-05	0.00125	0.00128	0.00376	0.01718	0.15	0.00826	0.00925	0.0134	0.02477	0.006485	24.739	0.49735	0.64171	0.10604
21.486	73	1	148.56	0.00398	2.04E-05	0.00208	0.00212	0.00625	0.02727	0.241	0.01426	0.0154	0.02226	0.04278	0.016544	22.781	0.43032	0.68544	0.16649
21.793	73	1	155.55	0.00278	1.46E-05	0.00143	0.00152	0.00428	0.02356	0.21	0.01256	0.01358	0.01741	0.03767	0.00816	21.868	0.51448	0.66928	0.15686
22.104	73	1	162.61	0.00332	1.65E-05	0.00183	0.0019	0.00548	0.02907	0.282	0.01453	0.01729	0.02401	0.04358	0.007667	23.647	0.49879	0.6642	0.12097
22.411	73	1	169.6	0.00344	1.81E-05	0.00165	0.00185	0.00496	0.02563	0.225	0.01325	0.01611	0.02228	0.03975	0.015658	21.93	0.4846	0.67733	0.18776
22.719	73	1	176.61	0.00442	2.27E-05	0.00229	0.00207	0.00686	0.02399	0.252	0.01192	0.01388	0.01924	0.03576	0.016599	22.514	0.59327	0.66378	0.14364
23.031	73	1	183.7	0.00372	1.92E-05	0.00162	0.00172	0.00486	0.02178	0.193	0.01092	0.01354	0.01859	0.03276	0.012297	22.901	0.44991	0.68096	0.19405
18.093	73	1	8.5979	0.00191	8.64E-06	0.00086	0.00095	0.00258	0.01422	0.132	0.0067	0.00755	0.01213	0.02011	0.006093	27.577	0.45658	0.589	0.11149
18.169	73	1	15.551	0.00569	2.63E-05	0.00336	0.0027	0.01008	0.02439	0.22	0.0137	0.01456	0.0186	0.0411	0.025999	22.106	0.46626	0.59937	0.1666
18.246	73	1	22.596	0.00277	1.29E-05	0.00135	0.00124	0.00405	0.01434	0.134	0.0071	0.00816	0.01169	0.0213	0.011438	26.094	0.45056	0.60412	0.11948
18.322	73	1	29.599	0.00387	1.68E-05	0.00186	0.00149	0.00559	0.02127	0.189	0.01138	0.0131	0.01708	0.03415	0.011813	25.208	0.48401	0.59756	0.1488
18.397	73	1	36.569	0.00617	2.77E-05	0.00377	0.00354	0.0113	0.01704	0.195	0.00665	0.00812	0.01201	0.01996	0.037984	26.624	0.4226	0.56109	0.13905
18.474	73	1	43.599	0.00213	9.87E-06	0.0008	0.00098	0.00241	0.00936	0.089	0.00396	0.00498	0.00843	0.01187	0.005691	28.884	0.38297	0.57039	0.1185
18.55	73	1	50.609	0.00236	1.13E-05	0.00105	0.00101	0.00316	0.01346	0.13	0.00627	0.00751	0.01181	0.0188	0.009389	27.017	0.37366	0.60713	0.12185
18.626	73	1	57.594	0.00906	3.97E-05	0.00529	0.00602	0.01586	0.03177	0.31	0.01331	0.01547	0.01773	0.03994	0.065675	21.914	0.52934	0.58774	0.21178
18.702	73	1	64.598	0.01208	5.40E-05	0.00637	0.00558	0.01911	0.03961	0.412	0.01598	0.02252	0.02581	0.04795	0.11581	22.19	0.49263	0.56051	0.23702
18.778	73	1	71.597	0.00311	1.43E-05	0.00137	0.00145	0.0041	0.02832	0.271	0.01373	0.01666	0.02566	0.04118	0.01428	25.207	0.3656	0.60146	0.16092
18.854	73	1	78.604	0.00225	1.02E-05	0.00117	0.00118	0.00352	0.00985	0.088	0.00503	0.0059	0.00836	0.0151	0.008904	27.182	0.393	0.57035	0.10054
18.93	73	1	85.591	0.00259	1.22E-05	0.00085	0.00112	0.00255	0.0156	0.145	0.00618	0.00822	0.01661	0.01853	0.011076	25.537	0.39055	0.5783	0.18275
19.029	73	1	92.654	0.00288	1.30E-05	0.00137	0.00132	0.00412	0.01726	0.16	0.00854	0.00951	0.01372	0.02563	0.012585	24.528	0.40617	0.57197	0.1631
19.642	73	1	106.6	0.03414	0.00014685	0.02029	0.02036	0.06088	0.07823	0.782	0.03577	0.04087	0.03586	0.10732	0.37261	11.683	0.72	0.57829	0.40334
19.948	73	1	113.56	0.00259	1.24E-05	0.00116	0.00122	0.00349	0.01349	0.124	0.00578	0.00753	0.0133	0.01733	0.010631	25.551	0.42479	0.57681	0.16511
20.255	73	1	120.55	0.00277	1.35E-05	0.0011	0.00115	0.0033	0.0101	0.098	0.00384	0.00518	0.00956	0.01151	0.012582	26.342	0.42223	0.57791	0.12051
20.565	73	1	127.6	0.00927	4.16E-05	0.00406	0.00452	0.01217	0.0245	0.257	0.01011	0.01248	0.02004	0.03034	0.10801	20.73	0.46361	0.57639	0.31273
20.871	73	1	134.57	0.002	9.14E-06	0.00089	0.00098	0.00267	0.01435	0.125	0.00761	0.00826	0.01211	0.02284	0.005512	27.913	0.36527	0.5821	0.11868
21.181	73	1	141.62	0.00177	8.08E-06	0.00088	0.0009	0.00263	0.01116	0.096	0.00545	0.00641	0.01006	0.01636	0.002201	28.221	0.27236	0.59302	0.12583
21.486	73	1	148.56	0.00235	1.12E-05	0.0011	0.00122	0.0033	0.00979	0.107	0.00409	0.0053	0.01	0.01228	0.004566	27.242	0.34462	0.58132	0.14241
21.793	73	1	155.55	0.00299	1.36E-05	0.00135	0.00158	0.00405	0.01381	0.127	0.00639	0.00827	0.01317	0.01916	0.017725	25.843	0.44575	0.55898	0.14678
22.104	73	1	162.61	0.00273	1.19E-05	0.00143	0.00154	0.0043	0.01246	0.134	0.00604	0.00691	0.01094	0.01812	0.015309	27.606	0.42848	0.58561	0.10979
22.411	73	1	169.6	0.00439	1.94E-05	0.00216	0.00215	0.00647	0.01715	0.163	0.00733	0.00946	0.01785	0.02199	0.02023	27.167	0.35809	0.58845	0.1884
22.719	73	1	176.61	0.00234	1.06E-05	0.0011	0.00106	0.0033	0.01187	0.108	0.00609	0.00713	0.01037	0.01827	0.005681	26.952	0.43655	0.57476	0.1183
23.031	73	1	183.7	0.00259	1.13E-05	0.00111	0.00104	0.00333	0.01376	0.129	0.00555	0.00718	0.01277	0.01664	0.007869	26.225	0.40624	0.60236	0.12222
18.093	73	1	8.5979	0.00262	1.22E-05	0.00119	0.00133	0.00357	0.02221	0.194	0.00939	0.01152	0.02291	0.02817	0.009899	25.117	0.48611	0.5982	0.12539
18.169	73	1	15.551	0.00281	1.32E-05	0.0012	0.00136	0.00359	0.01821	0.166	0.00912	0.01067	0.01545	0.02736	0.014654	25.62	0.46819	0.59385	0.13488
18.246	73	1	22.597	0.00353	1.72E-05	0.0016	0.00175	0.00481	0.01403	0.154	0.00696	0.00685	0.00979	0.02087	0.01882	26.238	0.42074	0.60666	0.11901
18.322	73	1	29.599	0.00731	3.17E-05	0.00402	0.00377	0.01205	0.02486	0.287	0.01299	0.01383	0.01769	0.03896	0.058692	23.122	0.51951	0.56769	0.20573
18.398	73	1	36.57	0.00465	2.14E-05	0.00253	0.00254	0.0076	0.01743	0.184	0.00858	0.00974	0.01495	0.02573	0.028995	24.464	0.44061	0.57812	0.1868
18.474	73	1	43.6	0.00197	9.65E-06	0.00075	0.00094	0.00226	0.01227	0.112	0.00581	0.00653	0.00992	0.01744	0.010256	26.821	0.39648	0.57955	0.10416
18.55	73	1	50.61	0.00177	8.40E-06	0.00081	0.00094	0.00244	0.01034	0.093	0.00471	0.00595	0.01008	0.01412	0.002804	28.188	0.37112	0.57356	0.083495
18.626	73	1	57.594	0.00207	8.89E-06	0.00092	0.00085	0.00275	0.01048	0.093	0.00498	0.00546	0.00861	0.01493	0.007511	28.395	0.38601	0.5833	0.13203
18.702	73	1	64.598	0.00283	1.25E-05	0.00099	0.00124	0.00296	0.01862	0.165	0.00917	0.01059	0.01574	0.02751	0.018065	25.809	0.3714	0.56592	0.16682
18.778	73	1	71.597	0.00552	2.48E-05	0.00296	0.00297	0.00889	0.02301	0.227	0.01034	0.01254	0.01818	0.03102	0.049904	24.756	0.41761	0.58384	0.23871
18.854	73	1	78.605	0.00529	2.38E-05	0.00255	0.00283	0.00764	0.02009	0.276	0.00858	0.01102	0.01527	0.02573	0.05673	22.55	0.52312	0.57611	0.29894
18.93	73	1	85.592	0.02007	8.84E-05	0.01126	0.01213	0.03379	0.04398	0.521	0.01896	0.02614	0.02941	0.05689	0.19884	16.276	0.56059	0.57596	0.46336
19.029	73	1	92.655	0.00291	1.34E-05	0.00137	0.00164	0.0041	0.01608	0.151	0.00746	0.00989	0.01614	0.02239	0.01023	25.75	0.36517	0.5564	0.18757
19.642	73	1	106.6	0.01083	4.79E-05	0.00499	0.00661	0.01496	0.0221	0.353	0.00922	0.01074	0.01481	0.02765	0.14799	20.712	0.51346	0.57091	0.40736
19.948	73	1	113.56	0.00349	1.60E-05	0.00148	0.00182	0.00445	0.01636	0.171	0.00718	0.00866	0.01308	0.02153	0.025982	26.017	0.46312	0.57204	0.22278
20.255	73	1	120.56	0.0055	2.55E-05	0.00289	0.00303	0.00867	0.01905	0.191	0.00858	0.01037	0.01498	0.02575	0.03168	23.159	0.42894	0.57204	0.21725
20.565	73	1	127.6	0.00508	2.29E-05	0.0025	0.00294	0.0075	0.01638	0.165	0.00756	0.00908	0.01409	0.02268	0.032275	24.653	0.3447	0.57256	0.17126
20.871	73	1	134.57	0.00286	1.30E-05	0.00135	0.00134	0.00405	0.01183	0.116	0.00539	0.00701	0.01085	0.01618	0.013197	28.186	0.42436	0.5761	0.1241
21.181	73	1	141.62	0.00243	1.07E-05	0.00093	0.00107	0.0028	0.00901	0.085	0.00374	0.00489	0.00804	0.01122	0.009535	27.946	0.40626	0.56636	0.10282
21.486	73	1	148.56	0.00469	2.11E-05	0.00212	0.0024	0.00636	0.01218	0.146	0.00527	0.00636	0.0105	0.0158	0.040587	26.327	0.41235	0.57557	0.21611
21.793	73	1	155.55	0.0022	9.81E-06	0.001	0.00126	0.00299	0.01071	0.099	0.00461	0.00679	0.01243	0.01382	0.007663	28.445	0.3656	0.55323	0.12438
22.104	73	1	162.61	0.00283	1.31E-05	0.00134	0.0013	0.00401	0.0127	0.131	0.00566	0.00735	0.01158	0.01697	0.013679	27.759	0.49446	0.57752	0.11543
22.411	73	1	169.6	0.00429	1.83E-05	0.00215	0.00225	0.00646	0.01392	0.146	0.00563	0.00725	0.01366	0.0169	0.029798	26.647	0.45716	0.56255	0.16312
22.719	73	1	176.61	0.00182	8.09E-06	0.00069	0.00088	0.00208	0.00907	0.085	0.00419	0.00494	0.00828	0.01258	0.00912	28.392	0.34788	0.56519	0.11558
23.031	73	1	183.7	0.00284	1.27E-05	0.0012	0.00117	0.00361	0.01122	0.113	0.00409	0.00595	0.01172	0.01227	0.017459	26.071	0.37601	0.59141	0.18945
17	68	0	4.4333	0.00821	7.85E-05	0.00395	0.00479	0.01186	0.03119	0.31	0.01388	0.01709	0.02775	0.04163	0.028974	19.347	0.69439	0.75761	0.32504
17	68	0	11.344	0.0124	0.00011434	0.00513	0.0051	0.0154	0.03189	0.307	0.01446	0.01804	0.03232	0.04337	0.057857	19.824	0.75434	0.72243	0.41617
17	68	0	21.404	0.01136	0.00011587	0.00521	0.00545	0.01563	0.03029	0.281	0.01413	0.01785	0.02597	0.04239	0.02899	18.667	0.70424	0.76568	0.40988
17	68	0	28.342	0.0105	0.00011382	0.00575	0.00618	0.01724	0.0243	0.223	0.00944	0.01392	0.02507	0.02833	0.028745	18.892	0.66427	0.76549	0.38298
17	68	0	35.343	0.01302	0.00014336	0.00652	0.00659	0.01956	0.02995	0.302	0.01475	0.01623	0.02236	0.04426	0.040577	18.464	0.76876	0.76969	0.38067
17	68	0	42.343	0.01026	0.00011114	0.00504	0.0059	0.01511	0.02971	0.308	0.01245	0.0158	0.02999	0.03735	0.030161	19.988	0.65104	0.74645	0.39476
17	68	0	49.343	0.01074	0.00011317	0.00306	0.00457	0.00919	0.02663	0.267	0.01042	0.01535	0.02226	0.03127	0.049548	20.371	0.76877	0.73959	0.30801
17	68	0	56.361	0.00952	8.92E-05	0.00455	0.0058	0.01366	0.03989	0.53	0.01997	0.02578	0.03428	0.0599	0.037408	18.313	0.70223	0.77355	0.40057
17	68	0	63.342	0.01114	0.00012653	0.00458	0.00587	0.01373	0.03641	0.354	0.01383	0.0176	0.03463	0.04148	0.028069	19.462	0.68923	0.75953	0.35963
17	68	0	71.375	0.0113	0.00011441	0.00584	0.00603	0.01751	0.058	0.504	0.03273	0.03489	0.03768	0.0982	0.033495	17.526	0.68064	0.79008	0.39245
17	68	0	77.347	0.00917	0.00010366	0.00421	0.00556	0.01262	0.03251	0.299	0.0142	0.01887	0.02741	0.0426	0.028459	19.688	0.74695	0.77202	0.34077
17	68	0	84.347	0.01076	0.00011137	0.00529	0.00585	0.01586	0.02986	0.262	0.01353	0.01739	0.02481	0.04058	0.028793	20.168	0.63557	0.77455	0.32187
17.015	68	0	92.332	0.00845	8.45E-05	0.00369	0.00532	0.01107	0.03221	0.277	0.01209	0.01977	0.03251	0.03626	0.021386	19.869	0.72991	0.74041	0.36213
17.607	68	0	105.35	0.01392	0.00014132	0.00652	0.0055	0.01956	0.03859	0.364	0.0181	0.02261	0.03805	0.05429	0.038226	16.16	0.66448	0.75856	0.39718
17.928	68	0	112.41	0.00561	4.97E-05	0.00225	0.00287	0.00675	0.0263	0.251	0.01113	0.01429	0.02514	0.03339	0.010953	22.327	0.59137	0.71825	0.25499
18.243	68	0	119.35	0.01432	0.00013998	0.0073	0.008	0.0219	0.04859	0.441	0.02479	0.02884	0.04218	0.07436	0.058894	15.075	0.66831	0.78295	0.46529
18.557	68	0	126.26	0.00954	0.00011143	0.00453	0.0062	0.01358	0.04461	0.386	0.02389	0.03124	0.03728	0.07167	0.030771	17.783	0.66057	0.77525	0.39523
18.879	68	0	133.35	0.01613	0.00016735	0.00738	0.00831	0.02214	0.04184	0.418	0.01695	0.02387	0.04091	0.05086	0.093958	14.775	0.65953	0.76808	0.44589
19.197	68	0	140.34	0.00805	8.38E-05	0.00372	0.00439	0.01115	0.03313	0.311	0.01191	0.01729	0.0312	0.03574	0.02281	20.05	0.66444	0.74412	0.35642
19.516	68	0	147.34	0.00836	8.64E-05	0.00427	0.00478	0.01282	0.04872	0.441	0.02412	0.03181	0.04319	0.07235	0.026792	17.782	0.63551	0.74155	0.37486
19.834	68	0	154.34	0.01499	0.00014734	0.0077	0.0078	0.0231	0.03788	0.491	0.01771	0.02426	0.04006	0.05313	0.06207	16.522	0.73926	0.77078	0.46615
20.152	68	0	161.34	0.02149	0.00022301	0.01191	0.01244	0.03574	0.07241	0.602	0.0362	0.04359	0.04908	0.10859	0.1116	15.181	0.77308	0.75835	0.55243
20.47	68	0	168.35	0.00837	8.55E-05	0.00405	0.00529	0.01214	0.03818	0.34	0.01898	0.02399	0.03185	0.05693	0.02716	18.804	0.58288	0.76183	0.34075
21.106	68	0	182.34	0.01062	0.00010655	0.00505	0.00588	0.01515	0.04544	0.422	0.01973	0.02551	0.04415	0.0592	0.035036	17.789	0.69843	0.76904	0.40458
21.417	68	0	189.17	0.01282	0.00014858	0.00658	0.00851	0.01975	0.06299	0.589	0.03334	0.03776	0.05209	0.10003	0.0294	17.646	0.59762	0.78787	0.45869
21.743	68	0	196.36	0.01032	0.00011349	0.00519	0.00653	0.01558	0.02643	0.225	0.01242	0.01705	0.02348	0.03727	0.025386	17.743	0.70789	0.80284	0.41966
17	68	0	4.434	0.01457	0.00014237	0.00813	0.00814	0.02438	0.03278	0.333	0.01254	0.01683	0.03119	0.03761	0.045549	19.012	0.67987	0.77586	0.45746
17	68	0	11.344	0.0122	0.00011822	0.00592	0.00696	0.01776	0.02612	0.23	0.01139	0.01457	0.02671	0.03418	0.029892	19.21	0.72793	0.73733	0.37082
17	68	0	21.404	0.01209	0.00011542	0.00637	0.00751	0.01912	0.04613	0.497	0.02407	0.02892	0.038	0.07221	0.053914	15.663	0.72567	0.76719	0.43873
17	68	0	28.342	0.01246	0.00013177	0.00667	0.00667	0.02	0.03427	0.298	0.01779	0.01948	0.02602	0.05338	0.021489	19.511	0.53137	0.79038	0.42729
17	68	0	35.344	0.01243	0.00013586	0.00662	0.00731	0.01985	0.04695	0.435	0.02501	0.02446	0.03253	0.07502	0.029839	19.333	0.69898	0.8009	0.36547
17	68	0	42.344	0.03054	0.00033771	0.01708	0.01838	0.05125	0.06123	0.64	0.03175	0.03294	0.04752	0.09526	0.12953	14.911	0.8307	0.77987	0.58282
17	68	0	49.343	0.01888	0.00018599	0.01078	0.01115	0.03234	0.04953	0.458	0.02493	0.02943	0.03818	0.07478	0.054385	16.686	0.67594	0.79353	0.50397
17	68	0	56.361	0.03691	0.00037926	0.02236	0.0182	0.06709	0.0785	0.689	0.04862	0.04019	0.05058	0.14585	0.16423	12.451	0.70462	0.77427	0.64991
17	68	0	63.342	0.01002	0.00011502	0.00517	0.00527	0.01552	0.03713	0.326	0.01566	0.02155	0.03851	0.04698	0.025467	20.066	0.54129	0.77853	0.36162
17	68	0	71.375	0.01093	0.00011196	0.00504	0.00614	0.01512	0.06026	0.53	0.03152	0.03885	0.04797	0.09457	0.036771	17.569	0.58233	0.77115	0.38178
17	68	0	77.347	0.01891	0.00020223	0.01044	0.01018	0.03132	0.04398	0.395	0.0215	0.02867	0.03408	0.06451	0.064367	16.236	0.80527	0.80126	0.46142
17	68	0	84.348	0.00894	7.79E-05	0.00422	0.00495	0.01266	0.06728	0.628	0.03816	0.03793	0.05232	0.11449	0.039944	18.459	0.7849	0.79372	0.38595
17.015	68	0	92.333	0.00911	8.81E-05	0.00464	0.00542	0.01391	0.04269	0.4	0.02037	0.02737	0.04238	0.0611	0.020797	18.274	0.59055	0.77715	0.40062
17.607	68	0	105.35	0.01301	0.00013395	0.00741	0.0073	0.02222	0.05579	0.498	0.03168	0.03214	0.03706	0.09504	0.039691	17.84	0.6142	0.76107	0.36749
17.928	68	0	112.41	0.00951	8.78E-05	0.00506	0.00516	0.01519	0.05498	0.551	0.02696	0.02352	0.03798	0.08089	0.035167	19.792	0.56334	0.76828	0.32394
18.243	68	0	119.35	0.01076	0.00010572	0.00596	0.00648	0.01789	0.02509	0.217	0.01081	0.01471	0.02698	0.03243	0.02458	17.061	0.53141	0.79525	0.41394
18.557	68	0	126.26	0.01213	0.00013007	0.00615	0.00621	0.01846	0.05329	0.489	0.02485	0.02737	0.04536	0.07455	0.038535	17.802	0.60512	0.77519	0.41775
18.879	68	0	133.35	0.01253	0.00012741	0.00654	0.0067	0.01962	0.0395	0.362	0.01499	0.02452	0.04844	0.04498	0.057583	15.567	0.61107	0.78065	0.39604
19.197	68	0	140.34	0.01083	0.00011357	0.00576	0.00558	0.01727	0.04231	0.372	0.02046	0.02544	0.04375	0.06138	0.03052	18.964	0.60885	0.74904	0.39739
19.834	68	0	154.34	0.02001	0.00020082	0.01059	0.01066	0.03177	0.04955	0.508	0.02445	0.0272	0.03772	0.07335	0.06926	16.571	0.75278	0.79586	0.48826
20.152	68	0	161.34	0.01163	0.00012618	0.00566	0.00566	0.01697	0.04521	0.381	0.02104	0.02456	0.03389	0.06312	0.033385	18.873	0.71389	0.77331	0.44743
20.47	68	0	168.35	0.01704	0.00013645	0.00899	0.00906	0.02697	0.05694	0.727	0.0268	0.03074	0.04119	0.08041	0.064612	18.9	0.74869	0.778	0.43013
21.106	68	0	182.34	0.01136	0.00010155	0.00557	0.00607	0.01671	0.04911	0.631	0.02026	0.02899	0.0443	0.06079	0.046869	16.75	0.76457	0.80022	0.43929
21.417	68	0	189.17	0.01392	0.00016129	0.0079	0.00676	0.0237	0.0359	0.321	0.01604	0.02106	0.03767	0.04812	0.033837	18.705	0.57712	0.79322	0.44057
21.744	68	0	196.36	0.012	0.00010539	0.00627	0.00705	0.01882	0.08189	0.672	0.04123	0.05041	0.06257	0.12368	0.067866	13.628	0.73651	0.83627	0.46049
17	68	0	4.434	0.01246	0.00011986	0.00518	0.00632	0.01554	0.03521	0.338	0.01475	0.01462	0.02378	0.04424	0.047204	22.296	0.58649	0.79982	0.32762
17	68	0	11.344	0.01086	0.00010439	0.00571	0.00657	0.01714	0.042	0.368	0.01925	0.02397	0.03332	0.05775	0.025746	21.702	0.58924	0.7877	0.35242
17	68	0	21.405	0.00883	8.66E-05	0.00459	0.00517	0.01376	0.02057	0.177	0.00867	0.01248	0.0156	0.02601	0.030726	20.879	0.64142	0.79901	0.37111
17	68	0	28.342	0.00912	9.45E-05	0.0047	0.00556	0.01409	0.04273	0.415	0.02117	0.02221	0.03317	0.06351	0.022533	20.706	0.5435	0.7937	0.35721
17	68	0	35.344	0.01165	0.00012453	0.00563	0.00587	0.01688	0.03477	0.305	0.01558	0.01853	0.03008	0.04674	0.033685	19.963	0.58835	0.79681	0.37034
17	68	0	42.344	0.01848	0.00020213	0.01068	0.00769	0.03203	0.0357	0.312	0.01806	0.01863	0.02552	0.05418	0.049739	19.39	0.73576	0.80029	0.43977
17	68	0	56.362	0.01251	0.00012857	0.00706	0.00661	0.02118	0.0314	0.306	0.0137	0.01841	0.02668	0.04109	0.026474	20.58	0.58549	0.79805	0.42562
17	68	0	63.343	0.01146	0.00013255	0.00471	0.00407	0.01414	0.03553	0.314	0.01417	0.01644	0.03266	0.04252	0.030723	20.515	0.57257	0.79967	0.43147
17	68	0	71.376	0.01414	0.00014333	0.00824	0.00816	0.02472	0.05498	0.511	0.02844	0.03078	0.0416	0.08531	0.035625	17.821	0.56387	0.80735	0.4028
17	68	0	77.347	0.01161	0.00012938	0.0064	0.00553	0.0192	0.03302	0.293	0.01595	0.01903	0.02868	0.04784	0.030774	20.719	0.71266	0.799	0.3357
17	68	0	84.348	0.01893	0.00018731	0.00984	0.00977	0.02953	0.06018	0.564	0.02921	0.02745	0.04056	0.08762	0.062336	17.944	0.76372	0.80106	0.43427
17.015	68	0	92.333	0.00639	6.11E-05	0.00304	0.00368	0.00913	0.02796	0.249	0.01275	0.01633	0.02903	0.03824	0.013776	19.605	0.55992	0.79402	0.30601
17.607	68	0	105.35	0.0186	0.00018	0.01125	0.01014	0.03374	0.10783	0.931	0.06485	0.06018	0.07008	0.19456	0.055101	14.69	0.53546	0.77818	0.49725
17.928	68	0	112.41	0.00819	7.88E-05	0.00454	0.00415	0.01362	0.03616	0.347	0.01597	0.01818	0.03492	0.04791	0.019714	21.809	0.56449	0.76502	0.28669
18.243	68	0	119.35	0.01078	0.00010278	0.00552	0.00644	0.01655	0.04065	0.375	0.01805	0.01949	0.03173	0.05415	0.02831	18.589	0.62629	0.80444	0.39697
18.557	68	0	126.26	0.012	0.0001293	0.00589	0.00584	0.01768	0.02709	0.263	0.01155	0.01658	0.03251	0.03465	0.036571	18.167	0.6007	0.78183	0.39583
18.879	68	0	133.35	0.01164	0.00012011	0.00615	0.00679	0.01845	0.0686	0.613	0.03766	0.04338	0.05677	0.11298	0.049858	15.847	0.63448	0.7411	0.43261
19.197	68	0	140.34	0.0091	9.14E-05	0.00465	0.00503	0.01395	0.05403	0.48	0.02681	0.03305	0.04774	0.08044	0.033406	18.343	0.59905	0.76156	0.34678
19.516	68	0	147.34	0.00988	9.63E-05	0.00455	0.00491	0.01364	0.03849	0.339	0.01753	0.02392	0.03658	0.05258	0.023023	20.913	0.64648	0.76871	0.34794
19.834	68	0	154.34	0.01094	0.00012278	0.00429	0.00502	0.01288	0.0401	0.368	0.01749	0.02065	0.03685	0.05247	0.02539	19.895	0.69284	0.80096	0.40036
20.152	68	0	161.34	0.01264	0.00013641	0.00608	0.0056	0.01823	0.0359	0.316	0.01709	0.02122	0.02846	0.05128	0.035837	19.028	0.59081	0.7919	0.39155
20.47	68	0	168.35	0.0108	0.00011192	0.00553	0.00556	0.01658	0.03335	0.306	0.01677	0.01814	0.03146	0.05031	0.021929	19.93	0.67128	0.78336	0.36397
21.106	68	0	182.34	0.01058	0.00011035	0.00559	0.00603	0.01676	0.0358	0.306	0.01761	0.01977	0.02978	0.05283	0.024502	19.357	0.63873	0.8138	0.38968
21.417	68	0	189.17	0.00824	9.48E-05	0.00391	0.00451	0.01172	0.03302	0.292	0.01376	0.01776	0.03546	0.04128	0.018167	20.636	0.61611	0.79946	0.32026
21.744	68	0	196.36	0.01322	0.00013404	0.00656	0.00689	0.01968	0.04537	0.372	0.02348	0.02653	0.03417	0.07045	0.029166	19.776	0.61876	0.822	0.40427
17	68	0	4.4361	0.0071	6.11E-05	0.00294	0.00352	0.00883	0.02109	0.202	0.00904	0.01079	0.01916	0.02712	0.022964	23.771	0.58816	0.72529	0.24296
17	68	0	11.347	0.00832	7.14E-05	0.00433	0.00432	0.01298	0.02512	0.258	0.01053	0.01312	0.02664	0.0316	0.020682	23.033	0.61668	0.73409	0.2436
17	68	0	21.406	0.01469	0.0001427	0.0083	0.00598	0.02491	0.02178	0.192	0.01083	0.0117	0.01801	0.03249	0.035246	20.008	0.77182	0.74276	0.40434
17	68	0	28.344	0.00765	7.26E-05	0.00381	0.00433	0.01143	0.02914	0.27	0.01243	0.01602	0.02905	0.03728	0.016758	23.734	0.57247	0.76052	0.30913
17	68	0	35.346	0.01143	0.00012191	0.00618	0.0067	0.01855	0.02663	0.293	0.00861	0.01327	0.02812	0.02583	0.038967	19.201	0.8045	0.76717	0.39125
17	68	0	42.346	0.01135	0.00012098	0.00582	0.00597	0.01747	0.03908	0.351	0.01825	0.02254	0.03427	0.05476	0.021867	19.641	0.73021	0.77394	0.41932
17	68	0	49.345	0.00824	7.70E-05	0.0038	0.00372	0.01141	0.02108	0.204	0.00994	0.01109	0.01948	0.02982	0.012725	23.39	0.61504	0.71772	0.32053
17	68	0	56.363	0.01408	0.0001276	0.00581	0.00608	0.01742	0.02987	0.322	0.01349	0.01465	0.02525	0.04047	0.061246	20.646	0.58753	0.76476	0.33895
17	68	0	63.344	0.02334	0.00025574	0.01385	0.00918	0.04155	0.02973	0.259	0.01356	0.01524	0.02609	0.04068	0.06948	16.728	0.62464	0.75897	0.45734
17	68	0	71.377	0.01049	0.00010146	0.00487	0.00438	0.01462	0.04066	0.344	0.01981	0.02284	0.03082	0.05944	0.035388	20.863	0.66021	0.75968	0.39888
17	68	0	77.349	0.01037	0.00010592	0.00539	0.00502	0.01617	0.07253	0.757	0.03329	0.04101	0.04615	0.09986	0.07253	17.421	0.74878	0.76804	0.36079
17	68	0	84.349	0.00729	7.25E-05	0.00333	0.00316	0.00999	0.03234	0.289	0.01377	0.01629	0.03093	0.04131	0.017447	22.606	0.70024	0.78022	0.3051
17.015	68	0	92.335	0.01834	0.00017102	0.01027	0.00857	0.03082	0.0313	0.287	0.01423	0.01617	0.02539	0.0427	0.053748	19.461	0.59876	0.75217	0.45455
17.607	68	0	105.36	0.01134	0.00010622	0.00655	0.00611	0.01964	0.02542	0.225	0.01283	0.01484	0.02104	0.0385	0.030042	17.916	0.59275	0.72577	0.38349
17.928	68	0	112.41	0.01084	9.32E-05	0.00568	0.0063	0.01704	0.0328	0.369	0.01182	0.01581	0.03407	0.03546	0.037335	18.791	0.59032	0.74414	0.41869
18.243	68	0	119.35	0.01019	8.64E-05	0.00588	0.00628	0.01764	0.04155	0.417	0.02039	0.02407	0.04128	0.06116	0.063458	18.202	0.61687	0.76106	0.41766
18.557	68	0	126.26	0.01683	0.00017913	0.00962	0.00829	0.02886	0.03873	0.351	0.01829	0.02076	0.03518	0.05487	0.057558	18.288	0.6641	0.73743	0.44628
18.879	68	0	133.35	0.01071	0.00010525	0.00578	0.0052	0.01734	0.02916	0.257	0.01337	0.01618	0.0281	0.04011	0.0274	19.357	0.62624	0.72567	0.41635
19.198	68	0	140.35	0.02255	0.0002076	0.01409	0.01067	0.04226	0.06431	0.761	0.03606	0.03319	0.05332	0.10818	0.079401	16.19	0.66986	0.76481	0.5205
19.516	68	0	147.35	0.0103	0.00010065	0.00559	0.00546	0.01678	0.04503	0.395	0.02306	0.02849	0.03489	0.06917	0.039578	19.101	0.53705	0.75568	0.36523
19.834	68	0	154.35	0.01722	0.0001226	0.00861	0.00784	0.02583	0.05313	0.739	0.02216	0.03479	0.05458	0.06647	0.11114	16.967	0.76197	0.75358	0.43528
20.152	68	0	161.35	0.01414	0.00014268	0.00819	0.00785	0.02458	0.03947	0.352	0.0177	0.02093	0.0326	0.05311	0.04426	19.402	0.65374	0.75598	0.42565
20.47	68	0	168.35	0.01713	0.00016892	0.01021	0.00865	0.03064	0.04686	0.446	0.02312	0.02679	0.03946	0.06935	0.05563	17.387	0.75697	0.77215	0.45606
21.107	68	0	182.34	0.01113	0.00010196	0.00615	0.00428	0.01846	0.03222	0.302	0.01647	0.01661	0.0262	0.0494	0.039489	22.079	0.67	0.77117	0.35264
21.417	68	0	189.18	0.01418	0.00014881	0.00778	0.00686	0.02333	0.04421	0.378	0.02214	0.02335	0.03952	0.06641	0.051869	18.683	0.6214	0.76707	0.42856
21.744	68	0	196.36	0.0083	8.05E-05	0.00437	0.00469	0.01312	0.03987	0.349	0.01965	0.02408	0.03986	0.05894	0.025916	19.549	0.63628	0.78186	0.35934
17	68	0	11.347	0.00328	2.24E-05	0.00156	0.00177	0.00469	0.00786	0.069	0.00367	0.00462	0.00793	0.01102	0.003795	26.47	0.43088	0.68895	0.18814
17	68	0	21.407	0.00669	5.11E-05	0.00366	0.00332	0.01098	0.01691	0.166	0.00573	0.00807	0.01462	0.01718	0.029764	24.571	0.53283	0.69124	0.19407
17	68	0	28.344	0.006	4.70E-05	0.00318	0.00298	0.00954	0.01762	0.183	0.00905	0.00993	0.01445	0.02716	0.013919	25.299	0.53042	0.71969	0.19645
17	68	0	35.346	0.00904	7.25E-05	0.0041	0.00362	0.01229	0.01074	0.112	0.00443	0.00522	0.00826	0.0133	0.031349	24.509	0.63859	0.69975	0.41852
17	68	0	42.346	0.00443	3.64E-05	0.00209	0.00227	0.00627	0.01672	0.155	0.00692	0.00883	0.01631	0.02075	0.006872	23.517	0.50448	0.70523	0.22072
17	68	0	49.345	0.0066	5.15E-05	0.00374	0.00308	0.01122	0.01718	0.174	0.00772	0.00876	0.0144	0.02315	0.01168	25.713	0.49095	0.73617	0.16472
17	68	0	56.364	0.00733	5.89E-05	0.0042	0.00356	0.01259	0.02252	0.239	0.00969	0.01179	0.01705	0.02906	0.019408	23.531	0.51433	0.73652	0.28634
17	68	0	63.345	0.00406	3.54E-05	0.00199	0.00243	0.00598	0.01703	0.154	0.00785	0.00993	0.01683	0.02356	0.005077	24.658	0.57222	0.73215	0.20325
17	68	0	71.378	0.0051	3.77E-05	0.00217	0.00241	0.00651	0.01921	0.174	0.00865	0.01108	0.01845	0.02596	0.007895	25.448	0.54168	0.73144	0.22069
17	68	0	77.349	0.00526	4.53E-05	0.00239	0.00301	0.00717	0.01531	0.14	0.00558	0.00839	0.01258	0.01674	0.011812	25.344	0.6332	0.73634	0.21285
17	68	0	84.35	0.00786	6.40E-05	0.0044	0.0036	0.0132	0.01844	0.17	0.00875	0.00861	0.01272	0.02626	0.019434	24.947	0.53144	0.75237	0.27618
17.015	68	0	92.335	0.00476	3.76E-05	0.00206	0.0027	0.00618	0.01815	0.175	0.00739	0.00978	0.01563	0.02216	0.012237	22.337	0.47759	0.6959	0.22251
17.607	68	0	105.36	0.009	6.63E-05	0.00508	0.00436	0.01524	0.01516	0.134	0.00679	0.0087	0.01235	0.02037	0.023231	21.024	0.57029	0.71079	0.26877
17.928	68	0	112.41	0.00496	3.68E-05	0.00249	0.00259	0.00746	0.0162	0.159	0.00735	0.00854	0.01324	0.02205	0.017591	25.235	0.51456	0.6749	0.19647
18.243	68	0	119.35	0.00377	2.84E-05	0.00189	0.00209	0.00568	0.01828	0.168	0.00911	0.01049	0.01625	0.02734	0.004834	25.024	0.47941	0.71532	0.18044
18.557	68	0	126.26	0.00724	5.08E-05	0.00316	0.00338	0.00947	0.0164	0.264	0.00686	0.00918	0.01335	0.02059	0.046044	23.851	0.56558	0.72103	0.26191
18.879	68	0	133.35	0.00381	2.89E-05	0.00203	0.0022	0.00609	0.01661	0.144	0.00799	0.0093	0.01496	0.02396	0.006611	23.506	0.51887	0.69483	0.18044
19.198	68	0	140.35	0.00758	5.76E-05	0.00411	0.00378	0.01233	0.01551	0.141	0.00687	0.00839	0.01432	0.02061	0.02247	24.655	0.57637	0.70188	0.28997
19.516	68	0	147.35	0.00364	2.73E-05	0.00183	0.00208	0.00548	0.01756	0.153	0.00926	0.01084	0.01434	0.02777	0.005464	24.234	0.43628	0.7	0.19059
19.834	68	0	154.35	0.00557	4.35E-05	0.00269	0.00268	0.00808	0.01513	0.14	0.00662	0.00836	0.01363	0.01987	0.016255	24.887	0.6298	0.71803	0.18291
20.152	68	0	161.35	0.00503	3.92E-05	0.00254	0.00251	0.00761	0.0132	0.118	0.00636	0.00728	0.01139	0.01907	0.013292	24.987	0.55318	0.70561	0.19264
20.47	68	0	168.35	0.00883	6.29E-05	0.00515	0.00392	0.01544	0.01866	0.191	0.00821	0.00904	0.01505	0.02464	0.041355	24.079	0.51518	0.70002	0.24402
21.107	68	0	182.34	0.0048	3.52E-05	0.00214	0.00216	0.00642	0.01816	0.159	0.00791	0.01085	0.01659	0.02374	0.01927	24.726	0.61555	0.72565	0.2682
21.417	68	0	189.18	0.00745	6.21E-05	0.0037	0.00388	0.0111	0.02784	0.266	0.01123	0.01608	0.02868	0.0337	0.017573	23.079	0.55091	0.7477	0.27516
21.744	68	0	196.36	0.00469	3.60E-05	0.00184	0.00259	0.00551	0.01433	0.13	0.0064	0.00795	0.01161	0.0192	0.016439	23.706	0.59663	0.71059	0.23292
17	68	0	11.347	0.00688	4.73E-05	0.00369	0.00281	0.01108	0.01453	0.139	0.0068	0.00703	0.01055	0.02041	0.020217	22.731	0.4882	0.69649	0.21063
17	68	0	21.407	0.00826	6.14E-05	0.00462	0.0042	0.01387	0.02947	0.301	0.01533	0.01552	0.02022	0.04598	0.022625	20.984	0.58593	0.69271	0.27247
17	68	0	28.345	0.00629	4.93E-05	0.00323	0.00318	0.00969	0.02009	0.224	0.00766	0.00937	0.01589	0.02297	0.023779	24.884	0.53374	0.72608	0.32797
17	68	0	35.347	0.0082	6.71E-05	0.00439	0.00406	0.01317	0.0092	0.092	0.00392	0.00471	0.00705	0.01175	0.027483	25.208	0.55001	0.70146	0.22685
17	68	0	42.347	0.00886	7.26E-05	0.00485	0.00422	0.01456	0.01896	0.203	0.01065	0.0096	0.01375	0.03195	0.030662	24.566	0.60642	0.71159	0.22415
17	68	0	49.346	0.00741	5.57E-05	0.00433	0.00379	0.013	0.01339	0.137	0.0066	0.007	0.00897	0.01979	0.019014	23.683	0.50488	0.71188	0.24883
17	68	0	56.364	0.00782	5.87E-05	0.0044	0.00348	0.0132	0.01484	0.162	0.00751	0.00726	0.0106	0.02252	0.019232	24.91	0.5082	0.71818	0.21878
17	68	0	63.345	0.00839	7.46E-05	0.00424	0.00465	0.01273	0.02465	0.251	0.01091	0.01248	0.01968	0.03273	0.016768	22.808	0.61419	0.74747	0.33145
17	68	0	71.378	0.00469	3.53E-05	0.00229	0.00263	0.00687	0.01929	0.188	0.00768	0.01049	0.01983	0.02304	0.012889	24.271	0.51703	0.72821	0.20741
17	68	0	77.35	0.00602	4.90E-05	0.0031	0.0035	0.0093	0.01903	0.191	0.0084	0.01086	0.01672	0.02521	0.01633	24.272	0.51502	0.75227	0.21994
17	68	0	84.351	0.00622	4.95E-05	0.00354	0.00279	0.01061	0.02025	0.191	0.01074	0.01147	0.01536	0.03222	0.014001	25.373	0.52768	0.74458	0.16805
17.015	68	0	92.335	0.00682	5.41E-05	0.00297	0.00331	0.0089	0.0197	0.215	0.00843	0.01053	0.01625	0.02528	0.019275	21.33	0.56724	0.71214	0.24137
17.607	68	0	105.36	0.00709	5.32E-05	0.00365	0.0028	0.01095	0.01788	0.164	0.00846	0.00998	0.01569	0.02537	0.022113	22.068	0.53651	0.70331	0.2706
17.928	68	0	112.41	0.00597	4.49E-05	0.00295	0.00343	0.00885	0.02384	0.3	0.01318	0.01382	0.02114	0.03953	0.01947	22.035	0.55035	0.68394	0.23011
18.243	68	0	119.35	0.00342	2.61E-05	0.00141	0.00198	0.00423	0.02709	0.243	0.0112	0.0167	0.03031	0.0336	0.006698	23.565	0.46248	0.70502	0.20442
18.557	68	0	126.26	0.00746	6.09E-05	0.00389	0.00325	0.01167	0.01975	0.194	0.01035	0.01074	0.01556	0.03106	0.023634	22.98	0.47694	0.70263	0.34082
18.879	68	0	133.35	0.00997	8.00E-05	0.00559	0.00533	0.01677	0.02575	0.237	0.0119	0.01254	0.02104	0.0357	0.04163	19.232	0.53036	0.71119	0.2672
19.198	68	0	140.35	0.00298	2.11E-05	0.00125	0.00166	0.00374	0.01152	0.103	0.00538	0.00639	0.01066	0.01614	0.003264	26.495	0.48284	0.68031	0.17555
19.516	68	0	147.35	0.00595	4.48E-05	0.00296	0.00291	0.00888	0.0223	0.207	0.0119	0.01287	0.01653	0.03571	0.026468	23.227	0.4576	0.68946	0.1696
19.834	68	0	154.35	0.00402	3.16E-05	0.00175	0.00206	0.00525	0.01255	0.112	0.00552	0.00737	0.01326	0.01655	0.005785	24.291	0.54855	0.71496	0.15182
20.152	68	0	161.35	0.0065	5.18E-05	0.00328	0.00333	0.00984	0.02155	0.197	0.00969	0.01189	0.01754	0.02906	0.019707	22.862	0.54076	0.70812	0.27774
20.47	68	0	168.35	0.00684	4.54E-05	0.0028	0.00341	0.0084	0.02097	0.381	0.00925	0.01072	0.01665	0.02774	0.036896	21.507	0.58004	0.70404	0.29972
21.107	68	0	182.35	0.01826	9.75E-05	0.00923	0.00795	0.02769	0.02687	0.523	0.01189	0.01519	0.02282	0.03568	0.05185	21.398	0.66186	0.72301	0.3383
21.417	68	0	189.18	0.01005	7.71E-05	0.00546	0.00473	0.01638	0.04061	0.534	0.02285	0.02044	0.03003	0.06855	0.057661	20.605	0.6476	0.71982	0.35842
21.744	68	0	196.36	0.00837	6.42E-05	0.00411	0.00369	0.01234	0.01972	0.195	0.00953	0.01078	0.0154	0.02858	0.027732	20.475	0.61431	0.70747	0.29229
12	58	0	10.303	0.00457	4.09E-05	0.00125	0.00206	0.00376	0.01879	0.168	0.00704	0.01018	0.01999	0.02112	0.0143	22.973	0.59941	0.63776	0.19357
12	58	0	17.312	0.00476	4.22E-05	0.00152	0.00146	0.00457	0.02025	0.174	0.00864	0.0104	0.01533	0.02593	0.029142	24.909	0.61754	0.6781	0.15227
12	58	0	24.311	0.00987	8.14E-05	0.00411	0.00489	0.01232	0.04438	0.421	0.02255	0.02557	0.03794	0.06764	0.063523	20.832	0.55224	0.68614	0.3643
12	58	0	31.313	0.00283	2.55E-05	0.00091	0.00135	0.00272	0.01446	0.129	0.00606	0.0081	0.01387	0.01818	0.004989	26.251	0.50013	0.61023	0.13027
12	58	0	38.313	0.00533	3.93E-05	0.00251	0.0025	0.00754	0.02274	0.208	0.01032	0.01092	0.02029	0.03095	0.03763	22.757	0.4583	0.66622	0.26012
12	58	0	45.352	0.00975	8.40E-05	0.00477	0.00537	0.0143	0.03077	0.305	0.01388	0.01476	0.01661	0.04164	0.092493	21.153	0.61172	0.67685	0.325
12	58	0	52.353	0.00308	2.77E-05	0.0013	0.00178	0.0039	0.01517	0.132	0.00819	0.009	0.0116	0.02458	0.006158	25.372	0.47186	0.67282	0.15395
12	58	0	59.354	0.01109	0.00011186	0.00601	0.00524	0.01804	0.03127	0.32	0.01747	0.01802	0.02065	0.05242	0.028941	21.955	0.50247	0.70848	0.28292
12	58	0	66.356	0.00695	5.92E-05	0.00332	0.00421	0.00996	0.02403	0.261	0.01227	0.01498	0.01731	0.03681	0.029062	23.896	0.5648	0.68545	0.20966
12	58	0	73.353	0.01537	0.00013609	0.00923	0.00876	0.02769	0.03356	0.324	0.01318	0.01517	0.01493	0.03954	0.1137	20.778	0.63132	0.69394	0.3673
12	58	0	80.353	0.00749	6.62E-05	0.00345	0.00397	0.01036	0.02161	0.196	0.01094	0.01373	0.01558	0.03282	0.042503	23.345	0.58053	0.66037	0.28288
12	58	0	87.353	0.01161	0.0001017	0.00455	0.00708	0.01364	0.02359	0.248	0.01134	0.01202	0.01844	0.03401	0.062596	21.683	0.54519	0.69943	0.27026
12.534	58	0	101.35	0.01733	0.00015717	0.01064	0.00852	0.03191	0.04243	0.439	0.02179	0.02426	0.02789	0.06536	0.090645	19.052	0.54904	0.67235	0.32194
12.894	58	0	108.35	0.00457	4.03E-05	0.00193	0.00229	0.0058	0.02628	0.239	0.01102	0.0141	0.021	0.03305	0.01867	22.796	0.59215	0.65152	0.19462
13.255	58	0	115.35	0.0071	6.88E-05	0.00347	0.00426	0.01041	0.04029	0.383	0.02194	0.02286	0.02942	0.06583	0.039965	19.447	0.61509	0.66334	0.24508
13.616	58	0	122.35	0.01063	9.67E-05	0.00472	0.00552	0.01415	0.04282	0.444	0.01669	0.02157	0.02842	0.05008	0.094699	17.116	0.67226	0.68515	0.39315
13.977	58	0	129.35	0.00873	7.23E-05	0.00436	0.0044	0.01308	0.02905	0.316	0.01205	0.01591	0.02375	0.03616	0.051173	21.953	0.6219	0.65107	0.27258
14.344	58	0	136.48	0.00752	5.95E-05	0.00271	0.00309	0.00812	0.02613	0.391	0.0127	0.01597	0.01826	0.03811	0.04029	21.655	0.65544	0.65277	0.3541
14.705	58	0	143.48	0.00672	5.77E-05	0.00258	0.00256	0.00775	0.02756	0.277	0.01162	0.01633	0.02064	0.03486	0.046529	23.45	0.5269	0.69375	0.26677
15.066	58	0	150.48	0.00297	2.95E-05	0.00127	0.00188	0.0038	0.01841	0.16	0.00961	0.01151	0.01673	0.02882	0.007379	23.996	0.50499	0.67702	0.15959
15.427	58	0	157.48	0.00465	4.29E-05	0.0022	0.00239	0.0066	0.02096	0.195	0.01036	0.01113	0.01557	0.03108	0.017417	23.61	0.53527	0.67529	0.24206
15.788	58	0	164.48	0.00419	4.18E-05	0.00159	0.00211	0.00476	0.01927	0.176	0.01019	0.01183	0.01616	0.03057	0.016922	21.189	0.60283	0.67402	0.20514
16.149	58	0	171.48	0.00591	5.53E-05	0.00252	0.0032	0.00756	0.02741	0.25	0.01248	0.01384	0.01796	0.03743	0.055935	22.002	0.6172	0.65743	0.28697
16.509	58	0	178.48	0.00522	4.76E-05	0.00203	0.00242	0.0061	0.01861	0.165	0.01061	0.01132	0.01457	0.03184	0.022875	24.179	0.52042	0.64058	0.18438
16.87	58	0	185.48	0.00585	5.33E-05	0.0025	0.0022	0.00749	0.02524	0.23	0.0128	0.0135	0.01665	0.03839	0.032603	23.826	0.53713	0.6738	0.22852
12	58	0	10.304	0.0054	4.92E-05	0.00213	0.00226	0.0064	0.02363	0.272	0.00978	0.01245	0.02416	0.02934	0.023357	22.389	0.6246	0.61345	0.27198
12	58	0	17.313	0.00347	3.03E-05	0.00133	0.00185	0.00399	0.03345	0.283	0.01687	0.01855	0.02122	0.05061	0.012868	24.718	0.5497	0.68531	0.2069
12	58	0	24.312	0.00352	2.97E-05	0.00118	0.00144	0.00353	0.01014	0.088	0.00451	0.00566	0.00957	0.01353	0.008622	26.28	0.465	0.65859	0.13955
12	58	0	31.314	0.00334	2.98E-05	0.00119	0.00184	0.00358	0.01815	0.163	0.00855	0.01029	0.01449	0.02564	0.006685	23.949	0.62322	0.58875	0.15836
12	58	0	38.313	0.02469	0.00018377	0.01578	0.01084	0.04735	0.04502	0.454	0.02598	0.01968	0.02939	0.07793	0.20499	16.113	0.64225	0.60862	0.25781
12	58	0	45.353	0.00416	3.56E-05	0.00158	0.00164	0.00475	0.0189	0.179	0.00906	0.01031	0.01578	0.02717	0.016746	25.464	0.50709	0.64232	0.16206
12	58	0	52.354	0.00447	3.98E-05	0.0015	0.00211	0.00449	0.0216	0.189	0.01109	0.01297	0.01973	0.03326	0.011837	24.729	0.5436	0.67055	0.16351
12	58	0	59.354	0.00539	5.09E-05	0.00201	0.00252	0.00602	0.01826	0.193	0.0083	0.00982	0.01267	0.02491	0.033288	23.237	0.53214	0.70943	0.13522
12	58	0	66.356	0.00395	3.39E-05	0.00162	0.00209	0.00485	0.02798	0.242	0.01489	0.01603	0.02229	0.04466	0.013437	23.493	0.60087	0.64543	0.18008
12	58	0	73.354	0.00439	3.94E-05	0.00178	0.00219	0.00535	0.02229	0.2	0.01048	0.01225	0.01788	0.03145	0.012619	23.773	0.64596	0.68462	0.19366
12	58	0	80.353	0.00442	3.88E-05	0.00164	0.00179	0.00492	0.02035	0.205	0.00931	0.01266	0.02012	0.02792	0.014397	23.865	0.60903	0.61169	0.25
12	58	0	87.354	0.00321	2.79E-05	0.00119	0.00155	0.00356	0.01099	0.095	0.00507	0.00626	0.01017	0.01521	0.007964	25.398	0.56878	0.70098	0.1593
12.534	58	0	101.35	0.0054	4.78E-05	0.00164	0.002	0.00493	0.027	0.251	0.01192	0.01623	0.02787	0.03576	0.022109	22.762	0.57788	0.64031	0.25753
12.894	58	0	108.35	0.00273	2.43E-05	0.00119	0.00162	0.00357	0.01444	0.131	0.00706	0.00869	0.01254	0.02119	0.006273	24.916	0.57436	0.59177	0.15945
13.255	58	0	115.36	0.00548	5.28E-05	0.00185	0.00252	0.00556	0.02519	0.228	0.01188	0.01525	0.02496	0.03564	0.017075	21.122	0.63613	0.60005	0.21384
13.616	58	0	122.35	0.00653	5.48E-05	0.00291	0.00333	0.00873	0.02434	0.276	0.01364	0.01487	0.01754	0.04091	0.043213	21.222	0.555	0.63485	0.23587
13.977	58	0	129.36	0.00645	5.32E-05	0.00238	0.00256	0.00714	0.02591	0.238	0.01159	0.01475	0.02524	0.03476	0.028559	22.657	0.57866	0.6489	0.28014
14.344	58	0	136.48	0.00508	4.43E-05	0.00122	0.00165	0.00365	0.01542	0.141	0.00613	0.00826	0.01492	0.01839	0.029522	21.861	0.60669	0.64164	0.20281
14.705	58	0	143.48	0.00583	5.27E-05	0.00209	0.00202	0.00627	0.01363	0.134	0.00552	0.00644	0.01102	0.01657	0.029636	23.612	0.55321	0.66928	0.26401
15.066	58	0	150.48	0.0032	3.07E-05	0.00109	0.00175	0.00328	0.0131	0.114	0.00694	0.0085	0.01266	0.02081	0.006523	23.86	0.58237	0.64329	0.14633
15.427	58	0	157.48	0.00518	4.68E-05	0.00262	0.00254	0.00787	0.03236	0.313	0.01806	0.02032	0.02294	0.05418	0.029453	22.686	0.5329	0.64724	0.20355
15.788	58	0	164.48	0.00454	4.80E-05	0.00197	0.00245	0.0059	0.02363	0.208	0.01211	0.01326	0.02008	0.03634	0.015299	20.95	0.58904	0.6848	0.22317
16.149	58	0	171.48	0.00656	5.91E-05	0.00246	0.0039	0.00737	0.02634	0.255	0.01299	0.01453	0.01987	0.03897	0.030748	22.943	0.51537	0.65125	0.19639
16.509	58	0	178.48	0.00436	4.16E-05	0.00171	0.00174	0.00513	0.02013	0.182	0.01045	0.01166	0.01796	0.03134	0.014581	24.453	0.6476	0.60275	0.17585
16.87	58	0	185.48	0.00551	5.33E-05	0.00285	0.00322	0.00855	0.02393	0.241	0.01195	0.01415	0.01564	0.03585	0.026689	24.508	0.57497	0.64235	0.2051
12	58	0	10.304	0.0035	3.21E-05	0.00118	0.00165	0.00353	0.01817	0.167	0.00777	0.00936	0.01725	0.02332	0.016427	23.503	0.54208	0.62107	0.14705
12	58	0	17.313	0.00279	2.51E-05	0.00106	0.00162	0.00319	0.01713	0.145	0.00745	0.01039	0.01718	0.02235	0.004595	25.55	0.55784	0.6472	0.13002
12	58	0	24.312	0.00473	4.01E-05	0.00246	0.00217	0.00737	0.01327	0.123	0.00616	0.00571	0.0099	0.01848	0.031117	25.545	0.44072	0.64664	0.20883
12	58	0	31.315	0.00577	5.16E-05	0.00247	0.00342	0.0074	0.01694	0.152	0.00759	0.00917	0.01325	0.02278	0.025665	25.03	0.5316	0.62093	0.20386
12	58	0	38.314	0.00609	4.53E-05	0.003	0.00283	0.009	0.01876	0.168	0.00801	0.00908	0.02024	0.02402	0.040548	25.477	0.51313	0.60503	0.21802
12	58	0	45.353	0.00397	3.37E-05	0.00145	0.00159	0.00434	0.0166	0.148	0.00828	0.01002	0.01473	0.02485	0.0101	26.536	0.56157	0.63183	0.14776
12	58	0	52.354	0.00849	7.23E-05	0.00326	0.00346	0.00978	0.02157	0.217	0.01017	0.01302	0.01911	0.03051	0.042236	21.067	0.59213	0.60524	0.26051
12	58	0	59.355	0.00365	3.46E-05	0.00196	0.00224	0.00587	0.02431	0.212	0.01304	0.01446	0.01879	0.03913	0.006448	24.197	0.4481	0.72026	0.17057
12	58	0	66.356	0.00319	2.74E-05	0.00124	0.00157	0.00373	0.02128	0.191	0.01127	0.01289	0.01922	0.03382	0.006981	24.874	0.4956	0.61333	0.13399
12	58	0	73.354	0.00426	3.84E-05	0.00144	0.00195	0.00431	0.03049	0.293	0.0162	0.01866	0.02338	0.0486	0.016055	24.166	0.49617	0.63673	0.24653
12	58	0	80.353	0.00454	3.80E-05	0.00168	0.00206	0.00505	0.02094	0.186	0.0104	0.01152	0.02088	0.03119	0.013758	22.387	0.53689	0.61022	0.1597
12	58	0	87.355	0.00472	4.01E-05	0.00231	0.00213	0.00692	0.01616	0.147	0.00636	0.00853	0.01988	0.01909	0.021064	24.856	0.55857	0.69898	0.21722
12.534	58	0	101.35	0.00304	2.60E-05	0.0009	0.00143	0.00271	0.01931	0.165	0.00926	0.01169	0.01938	0.02778	0.006773	24.231	0.5864	0.65177	0.13161
12.895	58	0	108.35	0.004	3.56E-05	0.00136	0.00207	0.00407	0.02009	0.201	0.0104	0.01199	0.01611	0.0312	0.023763	22.926	0.62213	0.59531	0.16722
13.255	58	0	115.36	0.00436	4.12E-05	0.00177	0.00225	0.00532	0.02124	0.21	0.01002	0.01292	0.01682	0.03007	0.016927	23.446	0.5772	0.61858	0.16902
13.616	58	0	122.35	0.00298	2.51E-05	0.00138	0.00188	0.00414	0.02279	0.196	0.01131	0.01487	0.02112	0.03393	0.005913	24.546	0.4904	0.61425	0.16845
13.977	58	0	129.36	0.00358	3.08E-05	0.00119	0.00184	0.00358	0.02278	0.209	0.00992	0.01387	0.02457	0.02976	0.007487	23.537	0.54325	0.66393	0.16845
14.344	58	0	136.48	0.00636	5.64E-05	0.00247	0.00324	0.00741	0.01723	0.169	0.00746	0.00953	0.01629	0.02237	0.027382	21.89	0.59306	0.6219	0.33955
14.705	58	0	143.48	0.00439	3.95E-05	0.00144	0.00173	0.00431	0.01898	0.184	0.00936	0.01091	0.01794	0.02807	0.016239	23.861	0.58213	0.63486	0.20004
15.066	58	0	150.48	0.00394	3.83E-05	0.00148	0.00209	0.00445	0.01759	0.156	0.00841	0.01035	0.01502	0.02522	0.015303	22.926	0.6146	0.6649	0.20126
15.427	58	0	157.48	0.00314	2.89E-05	0.00118	0.00184	0.00355	0.01813	0.158	0.00895	0.01056	0.01471	0.02686	0.011909	24.579	0.56361	0.63376	0.18572
15.788	58	0	164.48	0.00851	7.73E-05	0.00373	0.00446	0.0112	0.02358	0.364	0.01138	0.01375	0.02158	0.03414	0.036021	19.558	0.64572	0.67831	0.26447
16.149	58	0	171.48	0.0088	8.22E-05	0.00495	0.00383	0.01485	0.04276	0.373	0.02531	0.02159	0.02933	0.07592	0.040043	21.578	0.53653	0.65097	0.25369
16.509	58	0	178.48	0.0042	3.86E-05	0.00162	0.00177	0.00486	0.01853	0.165	0.00904	0.00984	0.0155	0.02713	0.018284	24.139	0.62291	0.61087	0.21037
16.87	58	0	185.48	0.00466	4.06E-05	0.00206	0.00243	0.00618	0.02318	0.214	0.0113	0.01489	0.01896	0.0339	0.019625	24.732	0.52737	0.6338	0.13556
12	58	0	10.306	0.00418	4.17E-05	0.00172	0.0019	0.00516	0.01528	0.153	0.00642	0.00881	0.01519	0.01927	0.013221	23.35	0.54787	0.71822	0.18197
12	58	0	17.315	0.01432	0.00012721	0.00779	0.0075	0.02338	0.04273	0.468	0.01942	0.02256	0.0367	0.05825	0.044667	22.595	0.59244	0.74071	0.33394
12	58	0	24.314	0.01049	9.69E-05	0.00566	0.00621	0.01697	0.03031	0.304	0.01685	0.01691	0.02132	0.05056	0.040166	20.618	0.49009	0.70631	0.2273
12	58	0	31.316	0.0056	5.18E-05	0.00212	0.00265	0.00636	0.02219	0.218	0.00969	0.01214	0.0206	0.02906	0.017543	24.915	0.50505	0.691	0.17846
12	58	0	38.315	0.01011	8.40E-05	0.00475	0.00557	0.01424	0.03224	0.444	0.01462	0.01575	0.02356	0.04387	0.036172	24.54	0.55436	0.6832	0.25805
12	58	0	45.355	0.00515	4.63E-05	0.00207	0.00274	0.00622	0.01591	0.145	0.0081	0.00926	0.01361	0.0243	0.018997	25.511	0.46442	0.71814	0.21728
12	58	0	52.356	0.0115	0.00010513	0.00462	0.00581	0.01387	0.0302	0.404	0.01567	0.01755	0.02216	0.04702	0.031666	20.433	0.55557	0.67689	0.31261
12	58	0	59.357	0.0035	3.08E-05	0.00143	0.00183	0.00429	0.01784	0.156	0.00879	0.01119	0.01647	0.02636	0.008882	24.206	0.58971	0.68937	0.17913
12	58	0	66.358	0.00744	6.40E-05	0.004	0.00344	0.01201	0.01647	0.157	0.0073	0.00933	0.01384	0.02189	0.045096	23.691	0.57016	0.68808	0.19238
12	58	0	80.356	0.00703	6.12E-05	0.00267	0.00329	0.008	0.01719	0.228	0.00737	0.00998	0.01413	0.02211	0.02107	24.116	0.5835	0.73326	0.26931
12	58	0	87.356	0.00871	8.32E-05	0.00478	0.00353	0.01435	0.01805	0.157	0.00955	0.00994	0.01378	0.02866	0.04123	25.132	0.50991	0.71002	0.30174
12.534	58	0	101.36	0.00607	5.39E-05	0.00209	0.00356	0.00626	0.02779	0.273	0.0139	0.01619	0.02573	0.04171	0.025287	21.959	0.54587	0.66481	0.24183
12.895	58	0	108.35	0.00915	8.97E-05	0.00536	0.00507	0.01607	0.03604	0.354	0.01942	0.0209	0.02485	0.05825	0.049783	18.814	0.62706	0.66736	0.35276
13.256	58	0	115.36	0.00409	3.77E-05	0.00154	0.00196	0.00462	0.01681	0.151	0.00791	0.00954	0.01519	0.02373	0.010527	24.415	0.56378	0.63571	0.21593
13.616	58	0	122.36	0.00644	5.96E-05	0.00294	0.00462	0.00881	0.01729	0.183	0.00867	0.01051	0.01423	0.026	0.028255	24.933	0.49543	0.67567	0.25172
13.977	58	0	129.36	0.01094	0.00010164	0.00432	0.00516	0.01295	0.02451	0.263	0.01095	0.01309	0.0213	0.03284	0.051928	21.25	0.61955	0.64705	0.22987
14.344	58	0	136.48	0.00493	4.73E-05	0.00182	0.0028	0.00547	0.02105	0.19	0.0089	0.01288	0.01927	0.02671	0.019129	20.296	0.70362	0.65965	0.23682
14.705	58	0	143.48	0.00379	3.69E-05	0.00146	0.00231	0.00437	0.01647	0.156	0.00839	0.00984	0.01527	0.02516	0.009235	22.51	0.56666	0.67931	0.21865
15.066	58	0	150.48	0.00528	5.30E-05	0.00204	0.00298	0.00611	0.02778	0.252	0.01426	0.0176	0.02225	0.04277	0.030313	17.879	0.71307	0.69243	0.30208
15.427	58	0	157.48	0.01587	0.00014988	0.00892	0.00736	0.02677	0.02874	0.368	0.01384	0.01366	0.01535	0.04153	0.089401	21.35	0.61451	0.64871	0.31612
15.788	58	0	164.48	0.00413	3.69E-05	0.00156	0.00207	0.00469	0.02495	0.226	0.01192	0.01472	0.0197	0.03575	0.024793	21.424	0.70156	0.6258	0.20145
16.149	58	0	171.49	0.00377	3.61E-05	0.00146	0.00214	0.00439	0.0269	0.24	0.01365	0.01802	0.02337	0.04094	0.008683	24.284	0.52071	0.66707	0.15878
16.51	58	0	178.48	0.01379	0.0001391	0.00522	0.00457	0.01566	0.02576	0.302	0.01104	0.01214	0.01663	0.03311	0.051094	20.294	0.6718	0.64089	0.39267
16.87	58	0	185.48	0.00414	3.62E-05	0.00126	0.00163	0.00378	0.02692	0.248	0.01259	0.01508	0.01985	0.03776	0.028273	24.383	0.53114	0.6663	0.24505
12	58	0	17.315	0.00517	4.17E-05	0.00274	0.0027	0.00822	0.03606	0.325	0.02046	0.02057	0.0254	0.06137	0.02704	21.545	0.56464	0.61718	0.23774
12	58	0	24.315	0.00389	3.59E-05	0.00143	0.00193	0.00429	0.02089	0.185	0.01145	0.01233	0.01537	0.03435	0.019787	25.503	0.60713	0.58665	0.090639
12	58	0	31.317	0.00289	2.14E-05	0.0011	0.0014	0.00331	0.02494	0.226	0.01175	0.0137	0.01921	0.03524	0.00871	25.922	0.5406	0.58207	0.14452
12	58	0	38.316	0.00659	4.70E-05	0.00318	0.00377	0.00953	0.01564	0.16	0.00562	0.00698	0.01237	0.01687	0.037464	25.75	0.57512	0.55919	0.17319
12	58	0	45.356	0.0034	2.59E-05	0.00156	0.00199	0.00467	0.01982	0.175	0.01	0.01214	0.01993	0.02999	0.055134	24.591	0.53669	0.57755	0.20222
12	58	0	52.357	0.00263	2.24E-05	0.00098	0.00156	0.00295	0.01369	0.121	0.00629	0.00815	0.0126	0.01888	0.00891	24.904	0.58053	0.55851	0.13856
12	58	0	59.357	0.00444	3.50E-05	0.00185	0.00212	0.00556	0.03071	0.316	0.01322	0.01953	0.03285	0.03965	0.019688	24.537	0.55785	0.65544	0.25978
12	58	0	66.358	0.00348	2.56E-05	0.00133	0.0017	0.004	0.01392	0.122	0.00553	0.00809	0.01539	0.0166	0.012534	25.514	0.52633	0.60191	0.15791
12	58	0	73.356	0.0032	2.82E-05	0.00126	0.00165	0.00377	0.05915	0.511	0.03337	0.03351	0.0408	0.1001	0.01608	19.927	0.60632	0.6574	0.16339
12	58	0	80.356	0.00373	3.21E-05	0.00124	0.00153	0.00371	0.01503	0.137	0.0057	0.00827	0.01632	0.0171	0.014522	25.451	0.60711	0.55935	0.19666
12	58	0	87.357	0.00289	2.36E-05	0.00116	0.00146	0.00347	0.01731	0.144	0.00775	0.00958	0.01556	0.02326	0.005631	25.629	0.60627	0.61745	0.12831
12.534	58	0	101.36	0.00854	6.34E-05	0.00348	0.00342	0.01045	0.02242	0.216	0.00919	0.0111	0.01596	0.02757	0.034651	22.967	0.70665	0.5745	0.28732
12.895	58	0	108.36	0.00379	2.92E-05	0.00125	0.00163	0.00374	0.02448	0.211	0.01162	0.01406	0.02135	0.03487	0.027862	23.743	0.64347	0.56789	0.19697
13.256	58	0	115.36	0.00413	3.44E-05	0.00135	0.002	0.00405	0.02028	0.201	0.00863	0.01177	0.02128	0.02589	0.018346	22.927	0.67508	0.55313	0.16714
13.616	58	0	122.36	0.00267	2.09E-05	0.00086	0.00134	0.00258	0.01686	0.142	0.00718	0.01068	0.01705	0.02154	0.016133	25.684	0.63567	0.56834	0.246
13.977	58	0	129.36	0.01244	9.26E-05	0.00637	0.00641	0.01912	0.03263	0.362	0.01588	0.01767	0.02136	0.04765	0.098808	22.079	0.63204	0.57432	0.29477
14.344	58	0	136.48	0.00262	2.11E-05	0.00098	0.00126	0.00295	0.01066	0.102	0.00481	0.0059	0.00989	0.01442	0.016039	26.023	0.59758	0.55161	0.11034
14.705	58	0	143.48	0.00256	2.02E-05	0.00102	0.00133	0.00306	0.01872	0.162	0.00852	0.01143	0.01853	0.02555	0.011088	25.639	0.69484	0.62713	0.13724
15.066	58	0	150.49	0.00304	2.84E-05	0.0012	0.00201	0.00359	0.01761	0.154	0.00899	0.01127	0.01647	0.02698	0.009406	23.221	0.643	0.59143	0.17216
15.427	58	0	157.48	0.00345	2.92E-05	0.00116	0.00133	0.00347	0.01298	0.118	0.00547	0.00703	0.01225	0.0164	0.022026	25.495	0.6425	0.56493	0.21427
15.788	58	0	164.48	0.00477	4.14E-05	0.00149	0.0024	0.00447	0.02353	0.215	0.0101	0.01296	0.02157	0.03029	0.027127	20.774	0.70115	0.59826	0.20308
16.149	58	0	171.49	0.0025	2.05E-05	0.00083	0.00131	0.00249	0.01573	0.138	0.00797	0.00977	0.01331	0.02392	0.011105	25.811	0.61136	0.58284	0.087213
16.51	58	0	178.48	0.00245	1.92E-05	0.00057	0.00109	0.0017	0.01327	0.114	0.00455	0.00674	0.01462	0.01366	0.009794	27.054	0.63241	0.5556	0.095693
16.87	58	0	185.49	0.00432	3.45E-05	0.00159	0.00193	0.00478	0.02345	0.212	0.01132	0.01379	0.01875	0.03396	0.037085	24.186	0.53256	0.61363	0.17815
12	58	0	10.307	0.00364	2.97E-05	0.0013	0.00139	0.00391	0.02463	0.226	0.01117	0.01407	0.02482	0.0335	0.017696	25.05	0.6235	0.61228	0.10358
12	58	0	17.316	0.00248	2.08E-05	0.00097	0.00129	0.00291	0.02024	0.194	0.0109	0.01196	0.01581	0.03269	0.010489	25.902	0.59655	0.59823	0.11962
12	58	0	24.315	0.00291	2.12E-05	0.0009	0.00138	0.00269	0.01554	0.139	0.00703	0.00888	0.01344	0.02108	0.016492	25.338	0.50426	0.55369	0.14646
12	58	0	31.317	0.0028	2.12E-05	0.00087	0.00128	0.0026	0.01575	0.137	0.00812	0.00868	0.01072	0.02435	0.009616	26.027	0.55084	0.57033	0.12869
12	58	0	38.317	0.00189	1.23E-05	0.00058	0.00086	0.00174	0.01249	0.109	0.0062	0.00768	0.0123	0.01861	0.002707	27.842	0.4494	0.54635	0.092377
12	58	0	45.356	0.00168	1.17E-05	0.00056	0.00087	0.00169	0.00795	0.07	0.00427	0.00432	0.00646	0.01282	0.002004	28.943	0.47671	0.53341	0.11275
12	58	0	52.358	0.00238	1.67E-05	0.00072	0.00118	0.00217	0.00951	0.083	0.00396	0.00526	0.0115	0.01189	0.004068	26.674	0.59358	0.53972	0.13399
12	58	0	59.358	0.00423	3.28E-05	0.00168	0.00184	0.00505	0.01483	0.163	0.00646	0.00798	0.01306	0.01939	0.016708	25.01	0.63726	0.59828	0.19269
12	58	0	66.359	0.00394	2.83E-05	0.00176	0.00259	0.00528	0.0155	0.147	0.00829	0.00882	0.01111	0.02486	0.024761	26.095	0.41697	0.57081	0.1905
12	58	0	73.357	0.00683	5.74E-05	0.00306	0.00361	0.00919	0.04662	0.478	0.02453	0.02832	0.03526	0.07359	0.057379	19.957	0.51632	0.60638	0.18805
12	58	0	80.356	0.00418	3.44E-05	0.00148	0.00172	0.00444	0.01905	0.195	0.00831	0.01147	0.01855	0.02494	0.01538	25.104	0.60944	0.56301	0.1779
12	58	0	87.358	0.00321	2.64E-05	0.00108	0.00148	0.00323	0.01386	0.135	0.0063	0.00772	0.01168	0.0189	0.015541	25.885	0.62135	0.55842	0.18307
12.534	58	0	101.36	0.00265	1.95E-05	0.00103	0.00143	0.00308	0.02046	0.201	0.00921	0.01083	0.02059	0.02762	0.006338	25.303	0.63629	0.57097	0.15577
12.895	58	0	108.36	0.00398	3.08E-05	0.00173	0.00181	0.00518	0.02242	0.226	0.01118	0.01256	0.01693	0.03354	0.033631	23.672	0.61602	0.56427	0.24182
13.256	58	0	115.36	0.00371	2.84E-05	0.00152	0.00155	0.00456	0.0177	0.155	0.0069	0.0087	0.01598	0.02069	0.013096	24.563	0.70695	0.54064	0.16047
13.616	58	0	122.36	0.00344	2.68E-05	0.00131	0.00188	0.00393	0.02346	0.215	0.01213	0.01463	0.02154	0.03638	0.01233	23.853	0.64024	0.56592	0.1778
13.977	58	0	129.36	0.00534	3.89E-05	0.00251	0.00288	0.00752	0.0199	0.188	0.0091	0.0121	0.01752	0.02729	0.021754	24.645	0.55721	0.55395	0.14849
14.344	58	0	136.48	0.00448	3.12E-05	0.00134	0.00185	0.00403	0.01687	0.16	0.00823	0.00972	0.01494	0.02468	0.038588	22.727	0.64239	0.56097	0.24776
14.705	58	0	143.48	0.0034	2.54E-05	0.00116	0.00155	0.00348	0.0246	0.224	0.01258	0.01393	0.01857	0.03775	0.01453	24.259	0.57238	0.6004	0.16446
15.066	58	0	150.49	0.00756	6.79E-05	0.00326	0.00251	0.00977	0.02789	0.253	0.01446	0.01678	0.02028	0.04339	0.035122	21.728	0.70391	0.61271	0.20732
15.427	58	0	157.48	0.00281	2.07E-05	0.00114	0.00162	0.00343	0.0286	0.242	0.01513	0.01806	0.02324	0.04538	0.008147	23.526	0.60645	0.55786	0.17055
15.788	58	0	164.48	0.00325	2.66E-05	0.00092	0.00158	0.00275	0.02454	0.217	0.00993	0.01455	0.02651	0.02978	0.020864	22.319	0.65501	0.58264	0.14916
16.149	58	0	171.49	0.01111	8.72E-05	0.00571	0.00774	0.01712	0.03061	0.277	0.01476	0.01746	0.02454	0.04428	0.086943	21.507	0.60566	0.61783	0.33211
16.51	58	0	178.49	0.00239	1.78E-05	0.00092	0.00124	0.00277	0.02113	0.205	0.00966	0.01156	0.01862	0.02898	0.009091	25.186	0.57991	0.56197	0.11391
16.87	58	0	185.49	0.00885	6.31E-05	0.00349	0.00259	0.01046	0.02815	0.269	0.01286	0.01615	0.02453	0.03859	0.096574	23.056	0.63175	0.57456	0.29767
17.466	55	0	7.6042	0.00432	2.98E-05	0.00184	0.00216	0.00551	0.02609	0.221	0.01287	0.01552	0.02213	0.03861	0.014801	23.333	0.47815	0.65659	0.19039
17.889	55	0	14.513	0.00355	2.69E-05	0.00137	0.00187	0.00412	0.01918	0.165	0.00909	0.01082	0.01619	0.02726	0.018494	24.284	0.45235	0.64913	0.17728
18.313	55	0	21.451	0.00387	3.07E-05	0.0018	0.00233	0.0054	0.02638	0.221	0.01373	0.01555	0.02184	0.04119	0.008292	24.273	0.4255	0.68082	0.18077
18.743	55	0	28.463	0.00372	2.75E-05	0.00178	0.00205	0.00534	0.0291	0.255	0.01353	0.01655	0.02652	0.04058	0.019198	21.621	0.57861	0.5958	0.17404
19.17	55	0	35.449	0.00254	1.92E-05	0.0012	0.00151	0.0036	0.01605	0.14	0.00794	0.01035	0.01516	0.02383	0.003832	25.691	0.39725	0.59892	0.13932
19.603	55	0	42.512	0.00372	2.90E-05	0.00167	0.00209	0.00501	0.02472	0.214	0.01061	0.01451	0.02547	0.03184	0.008381	22.726	0.4801	0.62121	0.17457
20.028	55	0	49.455	0.00339	2.75E-05	0.00149	0.00195	0.00447	0.0283	0.242	0.0126	0.01644	0.02667	0.03779	0.008176	23.986	0.45484	0.67904	0.16953
20.457	55	0	56.467	0.00365	2.83E-05	0.00178	0.00218	0.00535	0.02413	0.208	0.01217	0.01488	0.02382	0.03652	0.007776	23.252	0.42021	0.66264	0.189
20.947	55	0	64.469	0.0052	4.00E-05	0.00204	0.00237	0.00612	0.02422	0.21	0.01217	0.01477	0.02459	0.03652	0.010581	23.048	0.46056	0.65125	0.21635
21.321	55	0	70.571	0.00505	3.71E-05	0.00213	0.00231	0.00639	0.0245	0.227	0.01234	0.0155	0.0205	0.03701	0.029921	22.786	0.51155	0.64342	0.19022
21.747	55	0	77.531	0.00374	2.99E-05	0.00168	0.00202	0.00504	0.02472	0.206	0.01293	0.01494	0.02049	0.03878	0.013431	23.594	0.57294	0.64106	0.14928
22.178	55	0	84.578	0.00376	3.03E-05	0.00155	0.0019	0.00466	0.0232	0.202	0.01172	0.01447	0.02174	0.03516	0.019104	22.351	0.46307	0.66718	0.16032
22.156	55	0	105.52	0.00659	5.32E-05	0.00295	0.00339	0.00884	0.03433	0.349	0.01782	0.02091	0.02718	0.05345	0.035041	20.481	0.52494	0.69317	0.24202
21.372	55	0	112.5	0.00424	3.33E-05	0.00193	0.00232	0.00579	0.02545	0.219	0.01242	0.0147	0.02164	0.03727	0.015291	22.017	0.47115	0.66672	0.20221
20.595	55	0	119.43	0.00425	3.29E-05	0.00168	0.00177	0.00504	0.03433	0.302	0.01802	0.02281	0.02952	0.05405	0.021395	21.242	0.64423	0.62007	0.17195
19.804	55	0	126.47	0.00645	5.17E-05	0.00331	0.00396	0.00994	0.04106	0.346	0.02266	0.0252	0.03106	0.06797	0.026389	19.261	0.52661	0.6455	0.27019
19.016	55	0	133.49	0.00384	2.99E-05	0.00182	0.00224	0.00546	0.0253	0.229	0.0126	0.01534	0.02468	0.03781	0.01417	21.455	0.48666	0.6473	0.18409
18.234	55	0	140.46	0.00316	2.39E-05	0.00149	0.00187	0.00446	0.02307	0.194	0.01074	0.01243	0.02224	0.03221	0.00843	23.777	0.46009	0.64955	0.1682
17.433	55	0	147.59	0.00657	4.65E-05	0.00296	0.00295	0.00887	0.02527	0.247	0.01366	0.01534	0.02143	0.04099	0.022652	21.965	0.52419	0.67424	0.21074
16.662	55	0	154.46	0.00451	3.63E-05	0.00241	0.00245	0.00724	0.0306	0.275	0.01649	0.01889	0.02485	0.04948	0.023042	21.824	0.48105	0.69446	0.17494
15.874	55	0	161.48	0.00453	3.37E-05	0.00217	0.00231	0.00651	0.02837	0.281	0.01546	0.01775	0.02521	0.04639	0.022748	21.679	0.49735	0.66957	0.20201
14.193	55	0	176.46	0.00461	3.70E-05	0.00235	0.00277	0.00706	0.03212	0.262	0.01692	0.01802	0.02639	0.05077	0.018428	21.788	0.53245	0.66653	0.19964
13.513	55	0	182.52	0.0036	2.94E-05	0.00147	0.00179	0.0044	0.02428	0.215	0.01148	0.01322	0.02164	0.03445	0.011453	23.957	0.47249	0.65486	0.1686
17.466	55	0	7.6042	0.00419	3.01E-05	0.00208	0.00202	0.00625	0.02104	0.19	0.01099	0.01152	0.01631	0.03296	0.015201	25.266	0.54323	0.69606	0.14626
17.889	55	0	14.514	0.00303	2.31E-05	0.00142	0.00158	0.00426	0.01687	0.152	0.00878	0.00932	0.01363	0.02634	0.006274	25.144	0.39984	0.66991	0.1411
18.313	55	0	21.452	0.00393	3.03E-05	0.00172	0.00207	0.00517	0.02032	0.175	0.01067	0.01334	0.01755	0.032	0.013388	24.594	0.45098	0.67599	0.18328
18.743	55	0	28.463	0.00414	3.03E-05	0.0016	0.00191	0.00479	0.02105	0.199	0.01008	0.01188	0.01792	0.03025	0.019221	24.635	0.46426	0.61122	0.2377
19.17	55	0	35.45	0.00297	2.27E-05	0.00119	0.00158	0.00358	0.0167	0.145	0.00783	0.00999	0.01849	0.0235	0.005048	25.469	0.42125	0.61254	0.14084
19.603	55	0	42.512	0.0028	2.11E-05	0.00117	0.00152	0.00352	0.0165	0.144	0.00771	0.01012	0.01729	0.02312	0.00531	25.022	0.39394	0.6107	0.14626
20.028	55	0	49.456	0.00431	3.51E-05	0.00213	0.00249	0.00639	0.02189	0.191	0.01062	0.01369	0.02118	0.03186	0.023079	23.929	0.47948	0.6702	0.17033
20.457	55	0	56.468	0.00311	2.41E-05	0.00159	0.00192	0.00476	0.01869	0.163	0.00867	0.00989	0.01801	0.026	0.005254	24.299	0.40481	0.65822	0.16507
20.947	55	0	64.469	0.00404	3.14E-05	0.00197	0.00231	0.00592	0.01843	0.161	0.0083	0.01104	0.01865	0.0249	0.0135	23.9	0.45428	0.64861	0.18002
21.321	55	0	70.571	0.00546	4.07E-05	0.00264	0.0022	0.00792	0.02505	0.22	0.01178	0.0156	0.02334	0.03534	0.014839	23.736	0.44209	0.62788	0.17675
21.747	55	0	77.531	0.00306	2.46E-05	0.00103	0.00161	0.00308	0.01968	0.17	0.00826	0.01103	0.02268	0.02479	0.012419	25.365	0.45242	0.61652	0.1458
22.178	55	0	84.578	0.0026	2.06E-05	0.00119	0.00144	0.00356	0.02436	0.215	0.01227	0.01537	0.02299	0.0368	0.005136	24.797	0.40054	0.6407	0.12184
22.156	55	0	105.52	0.00374	3.18E-05	0.00172	0.00214	0.00516	0.02761	0.239	0.01398	0.01522	0.02629	0.04194	0.008494	22.082	0.44016	0.70206	0.17731
21.372	55	0	112.5	0.00323	2.54E-05	0.00152	0.00188	0.00455	0.03256	0.288	0.0163	0.01791	0.02883	0.0489	0.009245	23.74	0.46776	0.65495	0.15355
20.595	55	0	119.43	0.00333	2.55E-05	0.00166	0.00198	0.00499	0.04084	0.361	0.02271	0.02514	0.0313	0.06813	0.01464	21.123	0.61372	0.61902	0.16929
19.804	55	0	126.47	0.00412	3.30E-05	0.00231	0.00236	0.00694	0.0271	0.236	0.01501	0.01591	0.02321	0.04504	0.00864	22.798	0.42922	0.6332	0.18073
19.016	55	0	133.5	0.00288	2.31E-05	0.00134	0.00178	0.00402	0.01728	0.152	0.00853	0.01053	0.01634	0.02559	0.005345	24.546	0.3671	0.65122	0.1366
18.234	55	0	140.46	0.00245	1.85E-05	0.00117	0.00148	0.00351	0.01748	0.152	0.00821	0.01069	0.01619	0.02463	0.003171	26.933	0.34696	0.6293	0.13002
17.433	55	0	147.6	0.00243	1.78E-05	0.00112	0.0014	0.00337	0.01895	0.161	0.00919	0.01126	0.01705	0.02756	0.003269	27.427	0.40765	0.65399	0.143
16.662	55	0	154.46	0.00399	3.05E-05	0.00197	0.00223	0.0059	0.02451	0.231	0.01276	0.01478	0.01941	0.03827	0.014332	24.652	0.41151	0.66831	0.19154
15.874	55	0	161.48	0.00423	3.23E-05	0.00224	0.00233	0.00671	0.02737	0.238	0.01409	0.01602	0.02113	0.04228	0.012601	23.286	0.48586	0.64326	0.15531
14.193	55	0	176.46	0.00214	1.70E-05	0.00115	0.00128	0.00344	0.0186	0.16	0.00978	0.0111	0.0156	0.02935	0.002579	28.047	0.37394	0.65295	0.086541
13.512	55	0	182.53	0.00528	4.20E-05	0.00211	0.00225	0.00633	0.01802	0.19	0.00914	0.01054	0.01428	0.02743	0.018218	23.465	0.50684	0.69499	0.22887
17.466	55	0	7.6049	0.0027	1.93E-05	0.00141	0.0015	0.00424	0.01989	0.167	0.0102	0.01202	0.01815	0.03061	0.003769	25.987	0.42929	0.68595	0.11911
17.889	55	0	14.515	0.00405	3.06E-05	0.00179	0.00191	0.00538	0.01835	0.164	0.00907	0.01019	0.01402	0.02721	0.015853	24.243	0.43387	0.67111	0.17781
18.313	55	0	21.453	0.0049	3.94E-05	0.00248	0.00277	0.00745	0.01788	0.164	0.00859	0.00999	0.01578	0.02578	0.016535	25.409	0.50038	0.67053	0.15828
18.743	55	0	28.463	0.00315	2.36E-05	0.00144	0.00168	0.00433	0.02538	0.217	0.01199	0.01471	0.02358	0.03597	0.008777	24.205	0.4757	0.61113	0.16135
19.17	55	0	35.45	0.00456	3.53E-05	0.00197	0.0019	0.0059	0.01794	0.16	0.00739	0.00965	0.01819	0.02216	0.012841	24.374	0.50298	0.59353	0.14355
19.603	55	0	42.512	0.003	2.27E-05	0.00136	0.00161	0.00408	0.01737	0.164	0.00855	0.00967	0.01403	0.02566	0.01219	25.092	0.40027	0.62621	0.1472
20.028	55	0	49.456	0.0039	3.20E-05	0.00169	0.00217	0.00508	0.02371	0.21	0.01232	0.01413	0.01973	0.03695	0.015	22.386	0.50381	0.69298	0.16847
20.457	55	0	56.469	0.00344	2.75E-05	0.00152	0.00188	0.00456	0.01813	0.16	0.00827	0.01029	0.01778	0.0248	0.011993	23.927	0.49019	0.65624	0.19128
20.947	55	0	64.47	0.00345	2.65E-05	0.00173	0.00203	0.00518	0.02347	0.205	0.0119	0.01442	0.02049	0.03571	0.005801	24.522	0.39213	0.63267	0.1721
21.321	55	0	70.572	0.00303	2.29E-05	0.00144	0.00167	0.00431	0.01944	0.168	0.00931	0.0125	0.0193	0.02792	0.004947	25.72	0.4303	0.61633	0.15101
21.747	55	0	77.531	0.00255	2.06E-05	0.00115	0.00151	0.00344	0.01557	0.14	0.00721	0.0093	0.01489	0.02164	0.005762	25.822	0.39582	0.64291	0.11226
22.178	55	0	84.579	0.00425	3.46E-05	0.00167	0.00201	0.005	0.02287	0.202	0.0106	0.01293	0.02122	0.0318	0.010717	23.423	0.51929	0.66164	0.14311
22.156	55	0	105.52	0.00379	3.22E-05	0.00146	0.00194	0.00437	0.02968	0.254	0.01371	0.01582	0.02871	0.04113	0.017354	22.145	0.5374	0.6702	0.16502
21.372	55	0	112.5	0.00517	3.98E-05	0.00238	0.0027	0.00714	0.03304	0.29	0.01744	0.0189	0.02529	0.05233	0.022833	22.149	0.47966	0.64328	0.19452
20.595	55	0	119.43	0.00383	2.95E-05	0.0021	0.00203	0.00629	0.03245	0.299	0.0184	0.01652	0.02229	0.0552	0.016569	23.593	0.43707	0.63572	0.16241
19.804	55	0	126.47	0.00387	2.99E-05	0.00182	0.00167	0.00546	0.01965	0.179	0.00975	0.01175	0.01654	0.02926	0.022583	25.967	0.41854	0.6512	0.1757
19.016	55	0	133.5	0.00321	2.52E-05	0.0014	0.00161	0.00421	0.01837	0.164	0.00866	0.0103	0.01517	0.02598	0.008552	25.3	0.40978	0.65091	0.11985
18.234	55	0	140.46	0.00327	2.49E-05	0.00139	0.00158	0.00417	0.01628	0.145	0.00792	0.00958	0.01483	0.02377	0.005621	26.82	0.39907	0.63395	0.1038
17.433	55	0	147.6	0.00504	3.62E-05	0.00181	0.002	0.00544	0.02185	0.253	0.00889	0.01119	0.01979	0.02666	0.020634	24.425	0.70461	0.63846	0.29002
16.662	55	0	154.46	0.00296	2.35E-05	0.00135	0.00168	0.00405	0.02754	0.25	0.01306	0.01535	0.02394	0.03918	0.009861	24.134	0.52616	0.68302	0.15072
15.874	55	0	161.48	0.00272	2.11E-05	0.00133	0.00158	0.00398	0.0167	0.145	0.00874	0.01011	0.01366	0.02623	0.003514	26.412	0.36991	0.65954	0.13775
14.193	55	0	176.46	0.00296	2.37E-05	0.00135	0.00159	0.00406	0.01643	0.153	0.00802	0.01008	0.01452	0.02405	0.008134	26.439	0.4252	0.69154	0.062672
13.512	55	0	182.53	0.00342	2.92E-05	0.00139	0.00174	0.00417	0.02142	0.19	0.00825	0.0114	0.02242	0.02475	0.010041	24.291	0.51309	0.67945	0.14968
17.466	55	0	7.6062	0.00388	2.82E-05	0.00179	0.00221	0.00537	0.02025	0.179	0.00936	0.01231	0.01736	0.02807	0.009558	23.908	0.43854	0.69268	0.16382
17.889	55	0	14.516	0.00358	2.76E-05	0.00165	0.00197	0.00496	0.02089	0.181	0.01156	0.01337	0.01707	0.03469	0.008323	23.841	0.40425	0.66383	0.1746
18.314	55	0	21.454	0.00449	3.52E-05	0.00189	0.00248	0.00566	0.02387	0.202	0.01214	0.01512	0.02025	0.03643	0.01295	22.42	0.47347	0.68538	0.20349
18.743	55	0	28.465	0.00325	2.45E-05	0.0014	0.00189	0.0042	0.01868	0.159	0.009	0.01164	0.01799	0.02699	0.00512	24.392	0.40176	0.6588	0.17457
19.171	55	0	35.452	0.00416	3.28E-05	0.00183	0.00179	0.0055	0.0268	0.242	0.01364	0.01627	0.02233	0.04092	0.016122	23.851	0.43219	0.64207	0.22056
19.603	55	0	42.515	0.00305	2.49E-05	0.00129	0.00162	0.00387	0.02261	0.197	0.00958	0.01355	0.02524	0.02875	0.007547	23.898	0.49199	0.65203	0.13455
20.028	55	0	49.458	0.00366	2.86E-05	0.00181	0.00221	0.00543	0.02026	0.176	0.01013	0.0124	0.0173	0.03038	0.006351	23.94	0.38905	0.67862	0.18004
20.457	55	0	56.47	0.00658	5.25E-05	0.00281	0.00344	0.00843	0.05457	0.472	0.03157	0.03	0.04071	0.09471	0.031463	18.342	0.49957	0.6593	0.24255
20.947	55	0	64.472	0.00509	3.85E-05	0.00227	0.0027	0.00681	0.02832	0.244	0.01387	0.01744	0.02327	0.0416	0.012279	22.407	0.44081	0.66217	0.21979
21.321	55	0	70.574	0.00587	4.52E-05	0.00283	0.00315	0.0085	0.02919	0.262	0.01395	0.01752	0.02666	0.04186	0.031406	22.696	0.42725	0.63648	0.24078
21.747	55	0	77.533	0.00413	3.36E-05	0.00162	0.00195	0.00486	0.02194	0.194	0.00969	0.01177	0.01919	0.02908	0.015665	23.995	0.40357	0.63728	0.14919
22.178	55	0	84.581	0.00339	2.57E-05	0.00169	0.00193	0.00507	0.02197	0.184	0.00993	0.012	0.01872	0.0298	0.006046	24.932	0.45089	0.66472	0.17066
22.156	55	0	105.52	0.00493	3.94E-05	0.00193	0.00249	0.0058	0.02816	0.246	0.01354	0.01596	0.02665	0.04062	0.01953	20.944	0.50746	0.65944	0.18706
21.372	55	0	112.5	0.00353	2.76E-05	0.00182	0.0021	0.00547	0.02725	0.243	0.01443	0.01684	0.02618	0.04328	0.009577	22.201	0.45516	0.63377	0.16291
20.595	55	0	119.43	0.00285	2.12E-05	0.00119	0.00163	0.00358	0.01984	0.187	0.00998	0.01143	0.0168	0.02994	0.008456	24.113	0.43577	0.63319	0.14126
19.804	55	0	126.47	0.00497	3.97E-05	0.00192	0.00254	0.00577	0.0225	0.203	0.01062	0.01401	0.02026	0.03186	0.01967	22.331	0.47969	0.66993	0.17304
19.016	55	0	133.5	0.00385	2.91E-05	0.00153	0.00177	0.0046	0.01682	0.147	0.00819	0.01028	0.01322	0.02456	0.014211	25.426	0.41943	0.67342	0.21843
18.234	55	0	140.46	0.00411	3.12E-05	0.00175	0.0022	0.00525	0.02061	0.192	0.01033	0.01146	0.01602	0.031	0.012908	24.423	0.42607	0.64929	0.16929
17.433	55	0	147.6	0.00497	3.79E-05	0.00247	0.00287	0.00742	0.02573	0.259	0.01356	0.01647	0.02071	0.04067	0.015093	22.731	0.44532	0.66971	0.19246
16.662	55	0	154.46	0.00358	2.72E-05	0.00139	0.00173	0.00417	0.02297	0.206	0.01079	0.01375	0.0209	0.03237	0.009462	25.488	0.41074	0.651	0.16179
15.874	55	0	161.49	0.00214	1.52E-05	0.00091	0.00122	0.00272	0.01303	0.116	0.00613	0.00727	0.01296	0.0184	0.002336	28.159	0.32021	0.6257	0.11933
14.193	55	0	176.46	0.00234	1.86E-05	0.0012	0.00131	0.0036	0.01705	0.149	0.00944	0.01001	0.0142	0.02831	0.003505	26.237	0.35141	0.64751	0.083495
13.512	55	0	182.53	0.00332	2.62E-05	0.00128	0.00166	0.00385	0.0202	0.178	0.00988	0.01195	0.01634	0.02964	0.006196	24.457	0.47026	0.65819	0.14244
17.466	55	0	7.6069	0.00297	1.95E-05	0.00137	0.00153	0.0041	0.02256	0.205	0.00971	0.01245	0.02128	0.02913	0.010088	24.282	0.51837	0.58656	0.14506
17.889	55	0	14.517	0.00343	2.28E-05	0.00156	0.00132	0.00468	0.0139	0.119	0.00615	0.00833	0.01334	0.01846	0.011963	26.678	0.47409	0.57608	0.11092
18.314	55	0	21.455	0.0041	2.74E-05	0.00181	0.0022	0.00542	0.02137	0.191	0.00988	0.01396	0.02299	0.02964	0.013163	23.558	0.48499	0.57331	0.19789
18.743	55	0	28.466	0.00348	2.28E-05	0.00164	0.00187	0.00491	0.02948	0.255	0.01561	0.01855	0.02499	0.04682	0.014229	22.783	0.53367	0.56558	0.14919
19.171	55	0	35.453	0.0026	1.82E-05	0.00119	0.00139	0.00356	0.0181	0.157	0.00963	0.0112	0.01689	0.02889	0.005329	25.341	0.42025	0.55668	0.115
19.603	55	0	42.515	0.00288	2.03E-05	0.00124	0.00151	0.00371	0.01644	0.15	0.00727	0.00923	0.01534	0.0218	0.006447	24.785	0.44941	0.58304	0.14037
20.028	55	0	49.458	0.00317	2.07E-05	0.00147	0.00153	0.00441	0.01392	0.128	0.00596	0.00721	0.01144	0.01788	0.015993	25.906	0.499	0.5651	0.11354
20.457	55	0	56.471	0.00334	2.37E-05	0.00175	0.00199	0.00524	0.02238	0.197	0.01205	0.01383	0.01789	0.03616	0.007302	23.767	0.38572	0.56182	0.14626
20.947	55	0	64.472	0.00276	1.80E-05	0.00141	0.00161	0.00423	0.01724	0.15	0.00938	0.01007	0.01443	0.02815	0.004496	25.223	0.42116	0.56487	0.1495
21.321	55	0	70.574	0.00238	1.51E-05	0.00112	0.00122	0.00336	0.0141	0.125	0.00623	0.00812	0.01376	0.01869	0.006353	27.155	0.40701	0.57245	0.10279
21.747	55	0	77.534	0.00355	2.51E-05	0.00172	0.00184	0.00517	0.01953	0.177	0.00938	0.01134	0.01526	0.02814	0.01335	23.962	0.48073	0.58067	0.16347
22.178	55	0	84.581	0.00347	2.30E-05	0.00155	0.00186	0.00465	0.01797	0.164	0.00869	0.01021	0.01718	0.02606	0.009526	24.345	0.4307	0.57792	0.16961
22.156	55	0	105.52	0.00298	2.10E-05	0.00123	0.00171	0.0037	0.02211	0.201	0.01111	0.0128	0.01936	0.03333	0.008276	24.732	0.51433	0.55508	0.15336
21.372	55	0	112.5	0.00616	3.97E-05	0.00312	0.0025	0.00936	0.03856	0.343	0.02135	0.02237	0.02802	0.06404	0.030023	21.064	0.47444	0.55755	0.19252
20.595	55	0	119.43	0.00348	2.36E-05	0.00178	0.00191	0.00533	0.03977	0.366	0.02164	0.02182	0.03484	0.06493	0.010534	21.963	0.46413	0.57414	0.16807
19.804	55	0	126.47	0.00336	2.62E-05	0.00144	0.0017	0.00431	0.02285	0.202	0.01141	0.01319	0.01782	0.03424	0.015664	23.433	0.47772	0.56479	0.17555
19.016	55	0	133.5	0.00501	3.73E-05	0.00217	0.00243	0.0065	0.03086	0.276	0.01529	0.01908	0.02655	0.04588	0.014618	22.178	0.47831	0.57295	0.20352
18.234	55	0	140.46	0.00502	3.42E-05	0.00218	0.00194	0.00654	0.02106	0.203	0.01047	0.01175	0.01615	0.03142	0.019533	24.559	0.42852	0.56231	0.16635
17.433	55	0	147.6	0.00264	1.76E-05	0.00133	0.00131	0.00398	0.0138	0.154	0.00595	0.00745	0.01232	0.01784	0.009189	27.415	0.34868	0.56962	0.11621
16.662	55	0	154.46	0.00312	2.11E-05	0.00127	0.00169	0.0038	0.02592	0.251	0.01174	0.01617	0.02526	0.03523	0.012776	25.038	0.42575	0.56513	0.15397
15.874	55	0	161.49	0.00264	1.74E-05	0.00115	0.00141	0.00344	0.01972	0.217	0.00962	0.01035	0.0162	0.02887	0.008277	25.404	0.42994	0.55908	0.13409
14.193	55	0	176.46	0.00442	3.08E-05	0.00206	0.00222	0.00617	0.03121	0.281	0.01766	0.01763	0.02066	0.05299	0.010382	24.479	0.42378	0.57912	0.14939
13.512	55	0	182.53	0.00251	1.87E-05	0.00115	0.00144	0.00345	0.01801	0.16	0.00854	0.01145	0.01894	0.02562	0.004115	25.461	0.42773	0.57945	0.15523
17.466	55	0	7.6076	0.00289	1.88E-05	0.00136	0.0016	0.00408	0.02146	0.186	0.01171	0.01349	0.01875	0.03513	0.004738	25.072	0.47637	0.55494	0.16045
17.889	55	0	14.517	0.00191	1.28E-05	0.00097	0.00112	0.00292	0.01403	0.128	0.00767	0.00824	0.01251	0.02302	0.00275	27.692	0.45086	0.57965	0.080358
18.314	55	0	21.455	0.00318	2.11E-05	0.00151	0.00196	0.00452	0.02271	0.19	0.01175	0.01325	0.01794	0.03526	0.011092	24.271	0.48665	0.55947	0.15386
18.743	55	0	28.466	0.00405	2.65E-05	0.0017	0.00206	0.0051	0.02181	0.198	0.00915	0.0124	0.01998	0.02745	0.024542	22.68	0.53042	0.55198	0.15274
19.171	55	0	35.453	0.00337	2.32E-05	0.00156	0.00171	0.00467	0.02099	0.191	0.01082	0.01191	0.0164	0.03245	0.009862	24.434	0.50638	0.54921	0.1269
19.603	55	0	42.515	0.00268	1.89E-05	0.00144	0.00148	0.00432	0.01831	0.165	0.00845	0.0107	0.01894	0.02534	0.005998	24.2	0.44846	0.57764	0.11275
20.028	55	0	49.458	0.00349	2.25E-05	0.0018	0.00204	0.0054	0.02617	0.253	0.0137	0.01572	0.02082	0.04111	0.014289	24.073	0.49778	0.55718	0.14382
20.457	55	0	56.472	0.00312	2.11E-05	0.00147	0.0018	0.0044	0.02493	0.218	0.01287	0.01614	0.02272	0.03861	0.006795	23.783	0.43554	0.55535	0.18092
20.947	55	0	64.473	0.00258	1.62E-05	0.00121	0.00132	0.00364	0.02383	0.206	0.01333	0.01331	0.01679	0.03998	0.00591	26.559	0.4694	0.55583	0.10562
21.321	55	0	70.574	0.00269	1.65E-05	0.00124	0.00145	0.00372	0.01797	0.178	0.00927	0.01032	0.01223	0.02781	0.011534	25.434	0.37658	0.5664	0.13138
21.747	55	0	77.534	0.00388	2.65E-05	0.00175	0.00194	0.00525	0.02693	0.241	0.01397	0.01741	0.02095	0.0419	0.012295	23.235	0.52784	0.56363	0.16576
22.178	55	0	84.582	0.00355	2.32E-05	0.00175	0.00192	0.00524	0.01775	0.152	0.00874	0.01018	0.01494	0.02622	0.007347	23.781	0.46703	0.55306	0.14633
22.156	55	0	105.52	0.0036	2.37E-05	0.00133	0.00167	0.004	0.01968	0.17	0.00974	0.01146	0.01547	0.02922	0.019418	23.672	0.47875	0.55048	0.15974
21.372	55	0	112.5	0.00345	2.15E-05	0.00187	0.00199	0.0056	0.02663	0.231	0.01491	0.01666	0.02039	0.04474	0.007761	22.821	0.5409	0.55328	0.1506
20.595	55	0	119.43	0.00627	4.09E-05	0.00216	0.00271	0.00647	0.02651	0.255	0.01102	0.01573	0.02499	0.03306	0.040444	20.213	0.53932	0.55153	0.25612
19.804	55	0	126.47	0.00368	2.56E-05	0.00173	0.00225	0.00518	0.02473	0.217	0.0132	0.01571	0.02023	0.0396	0.009414	22.627	0.45125	0.55766	0.19423
19.015	55	0	133.5	0.00457	3.30E-05	0.00243	0.00282	0.00728	0.03882	0.34	0.02247	0.02439	0.02832	0.06742	0.012333	20.885	0.42129	0.57722	0.21364
18.234	55	0	140.46	0.0021	1.32E-05	0.00102	0.00125	0.00305	0.01269	0.116	0.00573	0.00701	0.01242	0.0172	0.009263	28.086	0.39985	0.546	0.10611
17.433	55	0	147.6	0.00313	2.07E-05	0.00128	0.0014	0.00385	0.02235	0.213	0.01049	0.01389	0.02129	0.03148	0.013932	25.958	0.37171	0.56784	0.12727
16.662	55	0	154.47	0.00248	1.63E-05	0.00101	0.0013	0.00302	0.01646	0.144	0.00803	0.00986	0.01544	0.02408	0.006792	26.878	0.37839	0.55217	0.10829
15.874	55	0	161.49	0.00291	1.90E-05	0.00137	0.00149	0.00411	0.02265	0.219	0.01175	0.01275	0.01632	0.03524	0.012174	24.941	0.49312	0.55835	0.10397
14.193	55	0	176.46	0.00356	2.42E-05	0.00205	0.00192	0.00616	0.02894	0.248	0.01754	0.01667	0.01921	0.05262	0.00694	24.382	0.41207	0.56606	0.13775
13.512	55	0	182.53	0.00428	2.99E-05	0.00158	0.00173	0.00475	0.02399	0.224	0.01165	0.01378	0.02	0.03495	0.01489	22.825	0.48869	0.5687	0.16575
20.896	62	0	14.356	0.00513	3.42E-05	0.00223	0.00221	0.00669	0.0288	0.26	0.0153	0.01702	0.02472	0.04591	0.018826	20.857	0.61785	0.62451	0.23478
20.354	62	0	21.394	0.00644	4.29E-05	0.00193	0.00236	0.0058	0.0262	0.262	0.01094	0.01455	0.02572	0.03283	0.038068	20.304	0.70751	0.60858	0.27152
19.818	62	0	28.363	0.00429	2.71E-05	0.00182	0.00225	0.00545	0.02483	0.224	0.01125	0.01508	0.02566	0.03374	0.015051	20.75	0.5606	0.6416	0.22783
19.28	62	0	35.36	0.00342	2.22E-05	0.00157	0.00203	0.0047	0.02196	0.205	0.01079	0.01327	0.01762	0.03238	0.020404	21.849	0.51064	0.60475	0.20953
18.742	62	0	42.359	0.00719	4.36E-05	0.00363	0.00337	0.01089	0.01874	0.204	0.00875	0.00992	0.01729	0.02625	0.033746	20.352	0.49286	0.63715	0.30483
18.203	62	0	49.364	0.00587	3.83E-05	0.00288	0.00268	0.00864	0.03286	0.299	0.0167	0.01984	0.03363	0.05011	0.020062	19.776	0.52437	0.63671	0.2307
17.667	62	0	56.328	0.0039	2.67E-05	0.00164	0.00203	0.00492	0.02314	0.209	0.01082	0.01397	0.02119	0.03245	0.016443	21.014	0.64103	0.61748	0.20923
17.126	62	0	63.359	0.00817	5.20E-05	0.00399	0.00272	0.01198	0.01432	0.138	0.00736	0.00857	0.01272	0.02209	0.041548	20.157	0.57117	0.61821	0.24817
16.589	62	0	70.347	0.00466	3.17E-05	0.002	0.00221	0.00599	0.0235	0.209	0.00986	0.01441	0.02361	0.02957	0.015367	21.233	0.58512	0.63538	0.18857
15	62	0	91.331	0.00356	2.31E-05	0.00162	0.0015	0.00485	0.02464	0.222	0.01122	0.01432	0.02553	0.03366	0.01477	22.58	0.53513	0.57921	0.16709
15	62	0	98.356	0.0045	2.97E-05	0.00239	0.00238	0.00717	0.02917	0.3	0.01474	0.0162	0.02548	0.04421	0.022078	20.933	0.57088	0.59143	0.24709
15	62	0	105.36	0.00333	2.35E-05	0.00153	0.0018	0.0046	0.01318	0.113	0.00724	0.00736	0.0099	0.02172	0.006939	23.614	0.51406	0.64138	0.16855
15	62	0	112.35	0.00543	3.67E-05	0.00288	0.00275	0.00864	0.02145	0.241	0.00908	0.01161	0.02073	0.02724	0.021756	22.277	0.58705	0.58754	0.17973
15	62	0	119.34	0.00306	1.97E-05	0.00138	0.00165	0.00413	0.01986	0.181	0.01026	0.01141	0.01594	0.03077	0.010575	21.384	0.61868	0.5831	0.16291
15	62	0	126.42	0.00328	2.02E-05	0.00145	0.00183	0.00436	0.01574	0.153	0.00689	0.00858	0.01392	0.02066	0.014101	23.311	0.4634	0.62916	0.20815
15	62	0	140.36	0.00409	2.74E-05	0.00201	0.00213	0.00603	0.01977	0.184	0.00934	0.01066	0.01854	0.02803	0.016002	22.605	0.58453	0.61062	0.19336
15	62	0	168.2	0.00383	2.33E-05	0.00202	0.00201	0.00605	0.0145	0.129	0.00695	0.00827	0.01152	0.02084	0.008313	22.318	0.46254	0.63402	0.17422
15	62	0	175.19	0.01328	9.71E-05	0.00707	0.00618	0.02121	0.0386	0.334	0.02232	0.02076	0.02869	0.06697	0.060829	14.946	0.55651	0.69895	0.325
20.896	62	0	14.356	0.00297	1.94E-05	0.00132	0.00164	0.00395	0.01889	0.165	0.00899	0.01096	0.01875	0.02698	0.006278	24.746	0.51359	0.63266	0.17142
20.354	62	0	21.394	0.0048	3.27E-05	0.00177	0.00207	0.00531	0.02085	0.203	0.00876	0.01198	0.0236	0.02627	0.01654	22.257	0.64451	0.58823	0.21622
19.818	62	0	28.363	0.0038	2.63E-05	0.00196	0.00196	0.00587	0.01998	0.185	0.00927	0.01144	0.01831	0.02782	0.008079	23.373	0.5101	0.63442	0.17808
19.28	62	0	35.361	0.00336	2.23E-05	0.00146	0.00177	0.00439	0.02313	0.206	0.01078	0.01345	0.02263	0.03235	0.008876	23.193	0.53664	0.6075	0.18551
18.742	62	0	42.359	0.0047	3.14E-05	0.00216	0.00254	0.00649	0.02158	0.198	0.00907	0.01241	0.02439	0.02722	0.013943	22.211	0.51216	0.61742	0.22776
18.203	62	0	49.364	0.00642	4.33E-05	0.00328	0.00307	0.00984	0.01807	0.212	0.0063	0.00967	0.02034	0.01891	0.027111	21.213	0.59479	0.63605	0.26009
17.667	62	0	56.329	0.00367	2.39E-05	0.00176	0.00194	0.00527	0.01835	0.169	0.00853	0.01049	0.01803	0.02558	0.014645	21.417	0.51281	0.59997	0.19084
17.126	62	0	63.359	0.00434	2.69E-05	0.00181	0.00219	0.00542	0.02684	0.244	0.01403	0.01679	0.02222	0.0421	0.019579	23.738	0.55961	0.60686	0.1686
16.589	62	0	70.347	0.00405	2.95E-05	0.0022	0.00211	0.00659	0.02214	0.195	0.01215	0.01212	0.01847	0.03646	0.008577	22.028	0.53013	0.61646	0.14631
15	62	0	91.332	0.00397	2.78E-05	0.0016	0.00241	0.00481	0.0213	0.203	0.00922	0.01257	0.02356	0.02767	0.030398	22.682	0.57378	0.57782	0.19951
15	62	0	98.356	0.00487	3.33E-05	0.00252	0.00246	0.00757	0.02125	0.206	0.01048	0.01333	0.01755	0.03145	0.026317	22.963	0.499	0.56648	0.22781
15	62	0	105.37	0.00439	2.99E-05	0.00217	0.00239	0.00651	0.02509	0.239	0.0139	0.01343	0.02023	0.0417	0.012369	23.197	0.60176	0.60854	0.17986
15	62	0	119.34	0.00393	2.67E-05	0.00164	0.00184	0.00493	0.01964	0.189	0.00789	0.01079	0.02057	0.02366	0.016862	22.499	0.58764	0.57213	0.16974
15	62	0	126.42	0.00325	2.11E-05	0.00136	0.00171	0.00407	0.01506	0.14	0.0061	0.00742	0.01423	0.01829	0.014097	24.844	0.53879	0.62415	0.22602
15	62	0	140.36	0.00345	2.26E-05	0.00146	0.00184	0.00439	0.02134	0.19	0.01006	0.01193	0.02306	0.03019	0.006912	23.385	0.57737	0.60533	0.18645
15	62	0	168.2	0.00295	1.91E-05	0.00133	0.00173	0.004	0.01465	0.129	0.00665	0.00864	0.01571	0.01994	0.004721	25.362	0.60117	0.61425	0.17362
15	62	0	175.19	0.00747	5.31E-05	0.00425	0.00325	0.01275	0.02496	0.232	0.01415	0.01384	0.01835	0.04246	0.025336	18.334	0.53876	0.71322	0.18678
20.896	62	0	14.357	0.00532	3.63E-05	0.00247	0.0023	0.0074	0.02255	0.213	0.01089	0.01362	0.01851	0.03266	0.022596	22.654	0.54273	0.61685	0.22386
20.354	62	0	21.394	0.00431	2.88E-05	0.00191	0.00222	0.00573	0.03535	0.331	0.01817	0.01857	0.03286	0.0545	0.019696	21.697	0.68523	0.58699	0.20804
19.818	62	0	28.364	0.00366	2.58E-05	0.00126	0.00167	0.00379	0.01681	0.157	0.00797	0.00976	0.01428	0.02392	0.013092	24.163	0.49804	0.64108	0.19392
19.28	62	0	35.361	0.00432	2.85E-05	0.00184	0.00191	0.00552	0.02949	0.281	0.01294	0.01699	0.02833	0.03881	0.011189	23.477	0.54751	0.60084	0.1841
18.742	62	0	42.36	0.00443	3.05E-05	0.00198	0.00228	0.00593	0.01619	0.15	0.00665	0.00945	0.01756	0.01995	0.014321	23.028	0.54668	0.62028	0.22827
18.203	62	0	49.365	0.00566	3.85E-05	0.00302	0.00344	0.00906	0.02691	0.334	0.01206	0.01639	0.02579	0.03619	0.024971	21.729	0.53515	0.61518	0.17815
17.667	62	0	56.329	0.006	4.18E-05	0.00309	0.00272	0.00928	0.02689	0.256	0.01181	0.01479	0.02672	0.03542	0.023051	19.817	0.60831	0.59447	0.19055
17.126	62	0	63.36	0.00653	4.27E-05	0.00346	0.00314	0.01038	0.02838	0.276	0.01388	0.01706	0.027	0.04165	0.024884	21.68	0.48828	0.61158	0.21698
16.589	62	0	70.347	0.00507	3.54E-05	0.00254	0.00277	0.00761	0.02083	0.211	0.00898	0.01207	0.02078	0.02694	0.016489	24.534	0.52779	0.62233	0.15864
15	62	0	91.332	0.00441	2.90E-05	0.00203	0.00224	0.00608	0.01943	0.235	0.00834	0.01163	0.01995	0.02502	0.016159	23.268	0.55437	0.5745	0.19062
15	62	0	98.356	0.00732	4.99E-05	0.00404	0.00344	0.01213	0.02883	0.293	0.01311	0.01699	0.0268	0.03934	0.031147	19.937	0.62011	0.59078	0.23663
15	62	0	105.37	0.00402	2.94E-05	0.00191	0.00208	0.00573	0.02186	0.205	0.01193	0.01095	0.01499	0.03579	0.012619	24.42	0.51176	0.62289	0.15761
15	62	0	112.35	0.00271	1.84E-05	0.00124	0.0016	0.00372	0.01888	0.167	0.00903	0.01223	0.01846	0.02708	0.011654	24.048	0.60077	0.56337	0.14821
15	62	0	119.34	0.00378	2.61E-05	0.00181	0.00202	0.00542	0.02007	0.186	0.00824	0.01081	0.0203	0.02471	0.022299	22.189	0.60422	0.57965	0.1699
15	62	0	126.42	0.00287	1.90E-05	0.00111	0.00147	0.00332	0.02022	0.176	0.00946	0.01239	0.02003	0.02838	0.009836	24.877	0.60526	0.60829	0.15712
15	62	0	140.36	0.00851	5.60E-05	0.00438	0.00366	0.01315	0.02341	0.294	0.01159	0.01306	0.02097	0.03477	0.045782	20.496	0.58322	0.60207	0.26182
15	62	0	168.2	0.00458	3.34E-05	0.00194	0.00215	0.00582	0.01615	0.15	0.00662	0.00887	0.01631	0.01985	0.01294	22.214	0.61654	0.61642	0.17043
15	62	0	175.19	0.00604	4.20E-05	0.00346	0.00318	0.01038	0.02763	0.247	0.01537	0.01477	0.01933	0.04611	0.022357	18.196	0.57532	0.71045	0.19484
20.896	62	0	14.358	0.00421	2.78E-05	0.00185	0.00211	0.00556	0.0194	0.175	0.00902	0.01075	0.01937	0.02705	0.01965	21.575	0.51309	0.62042	0.23845
20.354	62	0	21.396	0.00453	2.99E-05	0.00204	0.00246	0.00612	0.02116	0.197	0.00986	0.01197	0.01904	0.02959	0.02064	22.675	0.61202	0.61255	0.20092
19.818	62	0	28.365	0.00327	2.25E-05	0.00143	0.00173	0.00428	0.01199	0.105	0.0057	0.00696	0.01139	0.0171	0.00595	24.128	0.48429	0.63765	0.18127
19.28	62	0	35.363	0.00407	2.71E-05	0.00185	0.00215	0.00555	0.02707	0.254	0.01271	0.01586	0.02778	0.03814	0.019846	21.517	0.58978	0.62521	0.23866
18.741	62	0	42.361	0.00596	4.03E-05	0.00307	0.00361	0.00921	0.04681	0.518	0.0199	0.02642	0.04006	0.05971	0.039341	18.99	0.61447	0.59885	0.26218
18.203	62	0	49.366	0.0041	2.86E-05	0.00187	0.00223	0.00561	0.02156	0.187	0.00949	0.01351	0.02301	0.02847	0.011516	21.11	0.57706	0.62631	0.21906
17.667	62	0	56.331	0.00591	4.02E-05	0.00306	0.00317	0.00917	0.02209	0.326	0.00956	0.01191	0.02238	0.02869	0.040945	19.018	0.67493	0.61682	0.32294
17.126	62	0	63.361	0.00393	2.58E-05	0.00143	0.00201	0.00429	0.01282	0.147	0.00577	0.00657	0.01172	0.0173	0.023969	23.661	0.58319	0.6214	0.21167
16.589	62	0	70.349	0.00327	2.23E-05	0.00139	0.00187	0.00417	0.02982	0.269	0.01565	0.01652	0.02377	0.04696	0.008994	22.632	0.57781	0.61841	0.21141
15	62	0	91.334	0.00446	3.27E-05	0.00178	0.00213	0.00534	0.02113	0.197	0.00974	0.01261	0.02071	0.02923	0.017806	21.332	0.62606	0.5957	0.25321
15	62	0	98.358	0.00431	2.95E-05	0.00188	0.00188	0.00565	0.01794	0.172	0.00824	0.01037	0.01732	0.02471	0.02846	22.288	0.64051	0.58326	0.18333
15	62	0	105.37	0.00374	2.61E-05	0.00157	0.00214	0.00471	0.01327	0.122	0.00614	0.00801	0.01068	0.01841	0.01108	24.029	0.56874	0.62326	0.18851
15	62	0	112.36	0.00597	4.02E-05	0.00258	0.00302	0.00773	0.02019	0.208	0.00969	0.01144	0.01847	0.02908	0.038074	21.286	0.6344	0.58229	0.23743
15	62	0	119.35	0.00266	1.78E-05	0.00119	0.00156	0.00358	0.01955	0.171	0.01022	0.0127	0.01861	0.03065	0.020884	22.313	0.63693	0.57858	0.1743
15	62	0	126.42	0.00377	2.37E-05	0.00099	0.00147	0.00296	0.01161	0.106	0.00444	0.00562	0.01216	0.01331	0.018876	24.716	0.54782	0.61965	0.19245
15	62	0	140.36	0.00307	2.05E-05	0.00131	0.00178	0.00393	0.01621	0.156	0.0072	0.00943	0.01649	0.02161	0.01134	23.599	0.61535	0.62373	0.19124
15	62	0	168.2	0.00282	1.84E-05	0.00127	0.00171	0.0038	0.01776	0.159	0.00824	0.01	0.01792	0.02472	0.005488	24.411	0.56226	0.6362	0.16207
15	62	0	175.19	0.00332	2.36E-05	0.00146	0.00175	0.00439	0.02315	0.213	0.01171	0.01266	0.01924	0.03513	0.011323	23.668	0.57976	0.66062	0.1767
20.896	62	0	14.358	0.00467	3.06E-05	0.00197	0.00203	0.0059	0.02586	0.236	0.01213	0.01495	0.02261	0.03638	0.01114	23.467	0.52424	0.60731	0.15989
20.354	62	0	21.397	0.00359	2.15E-05	0.00145	0.00183	0.00436	0.02521	0.225	0.01258	0.0146	0.02167	0.03774	0.012254	21.957	0.60563	0.57477	0.20351
19.818	62	0	28.366	0.00321	1.99E-05	0.00145	0.00178	0.00434	0.01682	0.147	0.00879	0.01018	0.0154	0.02637	0.006274	23.589	0.54397	0.58921	0.19509
19.28	62	0	35.363	0.00411	2.44E-05	0.00176	0.00202	0.00528	0.02102	0.186	0.01103	0.01148	0.01749	0.03308	0.008964	23.119	0.57235	0.57859	0.2197
18.741	62	0	42.362	0.00588	3.57E-05	0.00249	0.00297	0.00748	0.02552	0.242	0.0118	0.01578	0.0261	0.03541	0.02068	19.533	0.51635	0.57195	0.30826
18.203	62	0	49.367	0.00549	3.35E-05	0.00259	0.0027	0.00777	0.0303	0.286	0.01339	0.01681	0.03458	0.04017	0.024413	18.985	0.61952	0.57609	0.26729
17.667	62	0	56.331	0.00273	1.77E-05	0.0012	0.00169	0.00361	0.01749	0.155	0.00784	0.0106	0.01889	0.02351	0.006928	23.145	0.58066	0.56599	0.17445
17.126	62	0	63.362	0.00328	2.02E-05	0.00149	0.00165	0.00448	0.02096	0.211	0.00868	0.01203	0.02149	0.02604	0.011614	22.964	0.57447	0.54488	0.17953
16.589	62	0	70.349	0.00415	2.54E-05	0.00201	0.00214	0.00604	0.0235	0.21	0.0121	0.0138	0.02153	0.0363	0.015724	21.011	0.48478	0.57597	0.21178
15	62	0	91.334	0.00455	2.99E-05	0.00213	0.00269	0.00639	0.02751	0.288	0.01319	0.01736	0.02445	0.03958	0.023384	20.36	0.58202	0.54733	0.21814
15	62	0	98.358	0.00578	3.52E-05	0.00299	0.00254	0.00896	0.02557	0.237	0.01302	0.01573	0.02632	0.03906	0.022853	20.937	0.53534	0.56175	0.17193
15	62	0	105.37	0.00503	3.16E-05	0.00226	0.00247	0.00679	0.03049	0.288	0.01653	0.01801	0.02534	0.04958	0.022002	21.462	0.5832	0.56913	0.20698
15	62	0	112.36	0.00405	2.53E-05	0.00227	0.00223	0.0068	0.01584	0.141	0.00809	0.0092	0.01386	0.02427	0.015161	20.336	0.57405	0.53221	0.20184
15	62	0	119.35	0.00264	1.55E-05	0.00114	0.00146	0.00342	0.02176	0.197	0.01068	0.01163	0.02034	0.03204	0.013006	22.762	0.51327	0.54324	0.15041
15	62	0	126.42	0.00396	2.31E-05	0.00132	0.00187	0.00395	0.02526	0.244	0.01116	0.01452	0.02455	0.03349	0.042182	22.527	0.59521	0.57126	0.21507
15	62	0	140.36	0.00351	2.21E-05	0.00175	0.00216	0.00525	0.02311	0.199	0.01242	0.01398	0.01959	0.03725	0.008072	22.483	0.55262	0.57679	0.21805
15	62	0	168.2	0.00477	3.04E-05	0.00206	0.00221	0.00619	0.01659	0.172	0.00805	0.00995	0.01562	0.02416	0.01939	23.176	0.61169	0.58071	0.22294
15	62	0	175.19	0.00398	2.47E-05	0.00184	0.00221	0.00552	0.03126	0.281	0.01389	0.01929	0.02915	0.04167	0.01974	24.083	0.60699	0.62118	0.17174
20.895	62	0	14.359	0.00505	3.09E-05	0.00267	0.00301	0.008	0.02457	0.244	0.01164	0.01412	0.02214	0.03493	0.034535	23.079	0.57295	0.58603	0.26789
20.354	62	0	21.397	0.00345	2.10E-05	0.0014	0.00177	0.0042	0.01956	0.174	0.00866	0.0111	0.01902	0.02597	0.012591	23.613	0.56828	0.56327	0.19945
19.818	62	0	28.366	0.00469	3.04E-05	0.00204	0.00238	0.00611	0.02725	0.241	0.01428	0.01528	0.02041	0.04285	0.016466	22.398	0.48492	0.58015	0.20615
19.28	62	0	35.364	0.00389	2.37E-05	0.00157	0.00179	0.0047	0.02923	0.26	0.01643	0.01569	0.02102	0.04928	0.012965	22.209	0.5756	0.57242	0.18997
18.741	62	0	42.362	0.00421	2.62E-05	0.00177	0.00223	0.00532	0.01988	0.174	0.01011	0.01271	0.01841	0.03034	0.020541	20.703	0.55975	0.56171	0.23892
18.203	62	0	49.367	0.00369	2.23E-05	0.00161	0.00208	0.00482	0.03352	0.314	0.01666	0.01993	0.03023	0.04998	0.022015	20.421	0.62452	0.5486	0.19472
17.667	62	0	56.332	0.00594	3.94E-05	0.00291	0.00268	0.00873	0.02279	0.245	0.01042	0.01344	0.02331	0.03126	0.024477	20.804	0.56083	0.55908	0.2124
17.126	62	0	63.362	0.00295	1.78E-05	0.00129	0.00182	0.00388	0.01908	0.182	0.00864	0.01195	0.02014	0.02592	0.00854	23.813	0.55625	0.55513	0.19186
16.589	62	0	70.349	0.0052	3.17E-05	0.00244	0.00305	0.00732	0.02151	0.209	0.01032	0.01324	0.02093	0.03096	0.022077	21.434	0.59071	0.56901	0.22645
15	62	0	91.335	0.00632	4.07E-05	0.00314	0.00316	0.00942	0.03579	0.334	0.02023	0.02102	0.02798	0.06068	0.034882	19.508	0.52565	0.5421	0.21315
15	62	0	98.359	0.00355	2.24E-05	0.0017	0.00212	0.0051	0.02632	0.235	0.01325	0.01544	0.02322	0.03975	0.009218	22.169	0.53807	0.55084	0.19042
15	62	0	105.37	0.00426	2.69E-05	0.00215	0.00219	0.00644	0.02494	0.227	0.01385	0.01456	0.01832	0.04156	0.017025	22.123	0.5403	0.56441	0.21271
15	62	0	112.36	0.00335	2.08E-05	0.00135	0.00184	0.00405	0.01888	0.181	0.00868	0.01192	0.01909	0.02605	0.018697	20.48	0.62871	0.53573	0.1991
15	62	0	119.35	0.00371	2.23E-05	0.00166	0.00216	0.00497	0.02934	0.302	0.0131	0.01785	0.02911	0.03931	0.01564	20.902	0.59264	0.54784	0.20041
15	62	0	126.42	0.00311	1.85E-05	0.00158	0.00177	0.00473	0.02817	0.257	0.01588	0.01561	0.0224	0.04763	0.009381	21.57	0.58216	0.56278	0.17928
15	62	0	140.36	0.0039	2.39E-05	0.00187	0.0023	0.00562	0.02483	0.22	0.01294	0.01607	0.01905	0.03882	0.009648	22.208	0.48784	0.55943	0.2034
15	62	0	168.21	0.00405	2.62E-05	0.00199	0.00232	0.00597	0.02663	0.27	0.01338	0.01623	0.0239	0.04014	0.017131	20.737	0.59633	0.57543	0.18398
15	62	0	175.19	0.00642	4.22E-05	0.00336	0.00391	0.01008	0.02362	0.238	0.01168	0.01336	0.02117	0.03505	0.028664	21.357	0.61843	0.6089	0.32855
16.072	73	1	6.5965	0.00463	2.17E-05	0.00266	0.00231	0.00798	0.02879	0.253	0.01658	0.01526	0.01957	0.04973	0.017601	20.702	0.51583	0.53408	0.13477
16.148	73	1	13.633	0.00495	2.52E-05	0.0028	0.0023	0.0084	0.01866	0.163	0.00945	0.01074	0.01532	0.02836	0.013983	20.071	0.52949	0.57876	0.15634
16.226	73	1	20.81	0.00467	2.70E-05	0.00264	0.00266	0.00792	0.04429	0.381	0.02017	0.02716	0.0486	0.06052	0.030323	20.21	0.53016	0.60364	0.23938
16.321	73	1	29.537	0.00936	5.13E-05	0.0048	0.00456	0.0144	0.06817	0.585	0.03846	0.03745	0.05203	0.11539	0.070795	18.897	0.60295	0.60928	0.25935
16.376	73	1	34.557	0.00585	3.22E-05	0.00273	0.00247	0.00819	0.024	0.224	0.01064	0.0137	0.023	0.03192	0.034238	20.067	0.58958	0.61807	0.21231
16.452	73	1	41.598	0.00547	3.03E-05	0.00252	0.00264	0.00757	0.03132	0.289	0.01515	0.01927	0.02837	0.04546	0.020578	19.879	0.53814	0.5869	0.22154
16.607	73	1	55.804	0.00354	1.87E-05	0.00173	0.00201	0.00519	0.01695	0.159	0.0087	0.00984	0.01298	0.02609	0.024527	25.076	0.40558	0.64875	0.16993
16.691	73	1	63.572	0.00529	2.68E-05	0.00297	0.00259	0.00891	0.02529	0.232	0.01109	0.01214	0.01701	0.03327	0.037594	22.67	0.50385	0.60107	0.27013
16.836	73	1	76.908	0.00237	1.07E-05	0.00099	0.00106	0.00297	0.0293	0.266	0.0117	0.01486	0.02593	0.03509	0.00833	25.731	0.46777	0.52301	0.090732
17.797	73	1	98.595	0.00412	2.21E-05	0.00232	0.00212	0.00695	0.02643	0.23	0.01488	0.0154	0.02138	0.04465	0.014644	19.551	0.46436	0.62182	0.15348
18.641	73	1	105.57	0.01942	0.0001383	0.00947	0.00864	0.0284	0.05258	0.549	0.02561	0.02749	0.03799	0.07682	0.21311	13.097	0.69137	0.6276	0.45473
19.517	73	1	112.82	0.0032	2.56E-05	0.00124	0.00161	0.00373	0.04419	0.404	0.02538	0.02774	0.03378	0.07613	0.022453	19.053	0.50748	0.55858	0.1549
20.351	73	1	119.72	0.00879	5.28E-05	0.00498	0.00519	0.01493	0.08977	0.772	0.05131	0.05762	0.0644	0.15394	0.07194	15.897	0.61289	0.58608	0.2904
21.192	73	1	126.68	0.00819	3.74E-05	0.00449	0.00505	0.01346	0.06553	0.631	0.03544	0.03912	0.05022	0.10632	0.052392	20.16	0.51692	0.56784	0.27659
22.869	73	1	140.55	0.00465	2.65E-05	0.00211	0.00241	0.00634	0.01713	0.151	0.00847	0.01069	0.01509	0.0254	0.010962	21.366	0.50822	0.59613	0.22087
23.715	73	1	147.55	0.01147	7.00E-05	0.00627	0.00575	0.0188	0.05339	0.521	0.02766	0.03455	0.03722	0.08297	0.11929	17.16	0.68403	0.60483	0.42547
24.582	73	1	154.73	0.00867	4.39E-05	0.00466	0.00465	0.01398	0.0477	0.433	0.02607	0.02937	0.0362	0.07822	0.059443	15.606	0.55201	0.61209	0.20868
26.261	73	1	168.61	0.00789	3.87E-05	0.00404	0.00447	0.01213	0.03561	0.369	0.01761	0.01739	0.02221	0.05284	0.047124	20.356	0.50459	0.66859	0.27926
27.108	73	1	175.62	0.00785	6.85E-05	0.00378	0.00469	0.01134	0.04494	0.411	0.02425	0.02899	0.03488	0.07274	0.057951	15.839	0.60193	0.63589	0.35775
16.072	73	1	6.5972	0.0033	1.40E-05	0.00164	0.00128	0.00493	0.01778	0.162	0.00945	0.00903	0.01317	0.02835	0.01391	25.264	0.56476	0.53035	0.12734
16.148	73	1	13.633	0.00272	1.43E-05	0.0012	0.00132	0.00359	0.01899	0.178	0.01058	0.01038	0.0134	0.03173	0.008068	24.36	0.47464	0.56755	0.13923
16.226	73	1	20.811	0.00296	1.28E-05	0.00147	0.00145	0.00442	0.02496	0.235	0.01178	0.01453	0.02091	0.03535	0.008358	25.976	0.50003	0.56339	0.11827
16.321	73	1	29.537	0.00645	3.09E-05	0.00326	0.00246	0.00977	0.03153	0.298	0.0183	0.01658	0.0186	0.0549	0.046881	20.954	0.45434	0.57213	0.18524
16.376	73	1	34.558	0.00301	1.58E-05	0.00158	0.0015	0.00473	0.02652	0.25	0.01584	0.01415	0.01609	0.04753	0.006031	24.179	0.43904	0.59184	0.080358
16.452	73	1	41.598	0.00579	3.10E-05	0.00308	0.00239	0.00923	0.02814	0.257	0.01508	0.01662	0.02127	0.04525	0.015759	22.184	0.50983	0.60566	0.18689
16.607	73	1	55.805	0.00359	1.88E-05	0.0019	0.00204	0.0057	0.02307	0.231	0.01168	0.01197	0.0198	0.03503	0.014575	25.672	0.43508	0.59123	0.13648
16.691	73	1	63.572	0.0044	2.49E-05	0.00228	0.00231	0.00684	0.02149	0.188	0.01163	0.01228	0.01688	0.0349	0.012359	21.48	0.4783	0.60247	0.17212
16.836	73	1	76.908	0.00312	1.62E-05	0.00149	0.00149	0.00448	0.02499	0.222	0.01228	0.01508	0.02472	0.03683	0.00648	25.21	0.4993	0.52415	0.086541
17.797	73	1	98.595	0.00663	3.79E-05	0.00308	0.0028	0.00924	0.05315	0.541	0.02875	0.02984	0.04474	0.08626	0.036122	18.336	0.53704	0.57711	0.1853
18.641	73	1	105.57	0.00274	1.33E-05	0.00129	0.00132	0.00386	0.01973	0.173	0.00874	0.01086	0.01689	0.02622	0.012286	25.102	0.44676	0.59267	0.2126
19.517	73	1	112.82	0.00548	2.78E-05	0.00297	0.00298	0.0089	0.05624	0.551	0.02993	0.03346	0.05001	0.0898	0.035979	19.241	0.43535	0.57269	0.17985
20.351	73	1	119.72	0.00544	2.99E-05	0.00282	0.00313	0.00846	0.02923	0.249	0.01679	0.01732	0.01915	0.05036	0.014027	22.677	0.43999	0.59325	0.16943
21.192	73	1	126.68	0.00596	2.88E-05	0.00339	0.00334	0.01018	0.02757	0.239	0.01532	0.01713	0.01923	0.04595	0.020185	22.001	0.58806	0.59908	0.16574
22.869	73	1	140.55	0.00508	2.52E-05	0.00284	0.00253	0.00852	0.03215	0.291	0.01747	0.01845	0.02461	0.0524	0.011685	23.52	0.40513	0.58001	0.16636
23.715	73	1	147.55	0.00475	2.45E-05	0.0026	0.00223	0.0078	0.02069	0.218	0.00832	0.01063	0.01703	0.02495	0.026889	26.876	0.43181	0.58513	0.1699
24.582	73	1	154.73	0.00573	3.54E-05	0.00287	0.0034	0.00862	0.05791	0.519	0.0334	0.03348	0.0375	0.10021	0.036637	18.957	0.48782	0.59472	0.24952
26.261	73	1	168.61	0.01273	6.11E-05	0.00724	0.00687	0.02173	0.04178	0.463	0.02294	0.01914	0.02273	0.06881	0.072473	19.912	0.44434	0.61445	0.27004
27.108	73	1	175.62	0.00595	3.54E-05	0.00279	0.00289	0.00837	0.02372	0.235	0.01224	0.01411	0.0174	0.03673	0.036201	19.726	0.54585	0.65033	0.2818
16.072	73	1	6.5972	0.00192	8.34E-06	0.00089	0.0009	0.00266	0.0117	0.106	0.00594	0.00692	0.00919	0.01783	0.00324	26.374	0.33431	0.54157	0.070348
16.148	73	1	13.634	0.00314	1.48E-05	0.00149	0.0012	0.00448	0.01492	0.13	0.00701	0.00727	0.01238	0.02102	0.011991	25.703	0.51977	0.54553	0.12
16.226	73	1	20.811	0.00549	4.16E-05	0.00239	0.00242	0.00718	0.05451	0.497	0.02685	0.03261	0.04436	0.08056	0.032377	17.633	0.60572	0.57159	0.18386
16.321	73	1	29.537	0.00511	4.28E-05	0.00182	0.00227	0.00545	0.0475	0.416	0.02126	0.03395	0.06221	0.06378	0.030728	20.877	0.55505	0.56924	0.16889
16.376	73	1	34.558	0.00537	2.89E-05	0.00277	0.00288	0.00831	0.03689	0.437	0.02082	0.01895	0.02346	0.06245	0.030442	21.21	0.51571	0.59669	0.15693
16.452	73	1	41.598	0.00627	4.05E-05	0.00291	0.00329	0.00874	0.03039	0.302	0.01577	0.01625	0.02258	0.04731	0.029853	19.182	0.62941	0.58415	0.18904
16.607	73	1	55.805	0.0027	1.42E-05	0.00124	0.00119	0.00372	0.01442	0.147	0.00638	0.00729	0.01128	0.01914	0.00551	26.152	0.50941	0.58587	0.085199
16.691	73	1	63.572	0.00197	9.81E-06	0.00085	0.00091	0.00256	0.01427	0.127	0.0066	0.00725	0.01167	0.01981	0.003533	27.84	0.37712	0.57414	0.10638
16.836	73	1	76.908	0.00257	1.29E-05	0.00128	0.00136	0.00383	0.0264	0.231	0.01123	0.01491	0.02837	0.03369	0.007757	22.702	0.41834	0.52908	0.11432
17.797	73	1	98.595	0.00375	1.92E-05	0.00207	0.00186	0.0062	0.03043	0.266	0.01713	0.01633	0.0236	0.05138	0.013893	22.675	0.4262	0.59313	0.15459
18.641	73	1	105.57	0.00409	2.10E-05	0.00195	0.00178	0.00585	0.0247	0.231	0.01339	0.01367	0.01834	0.04016	0.032198	23.021	0.46017	0.59806	0.1987
19.517	73	1	112.82	0.00411	2.87E-05	0.0021	0.00212	0.00629	0.0342	0.297	0.01841	0.02171	0.0313	0.05523	0.025112	18.289	0.46516	0.56574	0.1549
20.351	73	1	119.72	0.00533	2.67E-05	0.003	0.00228	0.00899	0.03695	0.336	0.02125	0.01955	0.02428	0.06374	0.014373	22.759	0.40258	0.56214	0.11922
21.192	73	1	126.68	0.00506	2.44E-05	0.0028	0.00243	0.0084	0.01936	0.189	0.00982	0.01091	0.01497	0.02945	0.021121	24.143	0.4173	0.57416	0.1495
22.869	73	1	140.55	0.00391	1.93E-05	0.00202	0.00192	0.00607	0.01421	0.134	0.00669	0.00815	0.01335	0.02008	0.005373	26.345	0.2935	0.56402	0.12583
23.715	73	1	147.55	0.00419	2.23E-05	0.00195	0.00125	0.00585	0.01172	0.107	0.00562	0.0067	0.00974	0.01686	0.02777	27.292	0.43952	0.58324	0.10287
24.582	73	1	154.73	0.0048	3.78E-05	0.00228	0.0026	0.00684	0.03923	0.381	0.02169	0.02332	0.02873	0.06507	0.028055	19.514	0.4939	0.58955	0.17779
26.261	73	1	168.61	0.00476	2.56E-05	0.00278	0.00262	0.00833	0.02564	0.234	0.01385	0.01397	0.01765	0.04154	0.019957	22.082	0.44643	0.64839	0.18008
27.108	73	1	175.62	0.00428	2.34E-05	0.0023	0.00189	0.0069	0.01717	0.151	0.00965	0.00878	0.01205	0.02896	0.012248	24.671	0.48398	0.62656	0.13027
16.072	73	1	6.5986	0.00465	2.33E-05	0.00196	0.00184	0.00589	0.01961	0.177	0.00904	0.01076	0.01728	0.02713	0.021231	22.628	0.48086	0.55605	0.1833
16.148	73	1	13.635	0.00516	3.33E-05	0.00259	0.00221	0.00777	0.01941	0.184	0.00947	0.0109	0.01491	0.0284	0.03191	18.997	0.64089	0.60962	0.1936
16.226	73	1	20.813	0.0066	6.05E-05	0.00223	0.00261	0.0067	0.0417	0.373	0.02057	0.02792	0.03587	0.06172	0.079673	16.386	0.61841	0.60269	0.23212
16.452	73	1	41.6	0.00356	2.14E-05	0.00158	0.00178	0.00473	0.0247	0.241	0.01332	0.01457	0.02128	0.03996	0.016898	22.71	0.50815	0.59255	0.11976
16.607	73	1	55.806	0.0032	1.81E-05	0.00131	0.0013	0.00394	0.01838	0.17	0.00828	0.00978	0.01564	0.02483	0.011063	25.74	0.46757	0.59991	0.14365
16.691	73	1	63.574	0.00963	5.88E-05	0.00546	0.00576	0.01637	0.06015	0.538	0.03437	0.03789	0.03997	0.10311	0.077756	14.858	0.52117	0.60979	0.27174
16.836	73	1	76.91	0.00339	1.67E-05	0.00171	0.00188	0.00512	0.01737	0.157	0.00888	0.00969	0.01515	0.02663	0.009428	24.532	0.402	0.56921	0.10391
17.797	73	1	98.597	0.00413	3.32E-05	0.00175	0.00188	0.00525	0.03162	0.295	0.01598	0.01877	0.02921	0.04793	0.027348	20.087	0.57558	0.59664	0.16471
18.641	73	1	105.58	0.00525	2.69E-05	0.00258	0.0024	0.00774	0.0246	0.226	0.01349	0.01468	0.0182	0.04048	0.023897	21.55	0.45465	0.61857	0.20486
19.517	73	1	112.82	0.00397	2.03E-05	0.00189	0.00212	0.00568	0.01627	0.148	0.00862	0.0094	0.01252	0.02586	0.016679	23.565	0.4194	0.57932	0.14633
20.351	73	1	119.72	0.00327	2.80E-05	0.00125	0.00181	0.00375	0.03062	0.276	0.01664	0.0214	0.02929	0.04991	0.022522	21.136	0.5374	0.61885	0.19342
21.192	73	1	126.68	0.00421	2.31E-05	0.00188	0.00194	0.00564	0.01376	0.122	0.00713	0.00818	0.00938	0.02138	0.014102	22.948	0.49271	0.62766	0.15982
22.869	73	1	140.55	0.00464	3.19E-05	0.00206	0.00248	0.00617	0.02813	0.266	0.01262	0.01768	0.02675	0.03787	0.038115	20.158	0.612	0.57712	0.26739
23.715	73	1	147.55	0.00336	1.88E-05	0.00148	0.00147	0.00443	0.02498	0.227	0.01288	0.01407	0.02065	0.03863	0.014346	25.45	0.46112	0.61267	0.11338
24.583	73	1	154.73	0.00429	2.50E-05	0.00176	0.00188	0.00529	0.02822	0.274	0.01442	0.01834	0.02318	0.04325	0.025125	21.748	0.50624	0.5952	0.19087
26.261	73	1	168.61	0.00488	2.88E-05	0.00264	0.00258	0.00791	0.01889	0.174	0.01035	0.01179	0.01461	0.03104	0.02016	21.351	0.5127	0.64841	0.20036
27.108	73	1	175.62	0.00521	3.06E-05	0.00265	0.00248	0.00796	0.02941	0.296	0.01591	0.01559	0.01834	0.04773	0.015159	22.081	0.53936	0.66702	0.25649
16.072	73	1	6.5993	0.00342	1.43E-05	0.00176	0.00141	0.00529	0.02166	0.205	0.01025	0.01006	0.01878	0.03076	0.009985	24.02	0.61489	0.52649	0.10245
16.148	73	1	13.635	0.00262	1.36E-05	0.00118	0.00125	0.00355	0.01523	0.133	0.00785	0.00906	0.01263	0.02356	0.016167	24.617	0.41777	0.58788	0.2005
16.226	73	1	20.813	0.00464	2.22E-05	0.00247	0.0026	0.00741	0.03692	0.34	0.02072	0.01674	0.02334	0.06215	0.024241	23.944	0.4546	0.57431	0.19364
16.321	73	1	29.54	0.00215	9.51E-06	0.00102	0.00108	0.00306	0.01338	0.118	0.00719	0.00784	0.00948	0.02157	0.007669	29.334	0.37853	0.54551	0.071798
16.376	73	1	34.559	0.00564	3.18E-05	0.00266	0.00297	0.00799	0.01579	0.175	0.00822	0.00862	0.01249	0.02466	0.01967	23.609	0.50592	0.59431	0.24608
16.452	73	1	41.6	0.00438	2.18E-05	0.00189	0.00216	0.00567	0.01158	0.139	0.0057	0.00665	0.00912	0.01711	0.030198	26.062	0.36261	0.58224	0.1825
16.607	73	1	55.806	0.00383	2.08E-05	0.00168	0.00191	0.00505	0.0218	0.197	0.01108	0.01209	0.01702	0.03324	0.020035	23.582	0.4684	0.60219	0.11753
16.691	73	1	63.574	0.00634	5.83E-05	0.00336	0.00379	0.01008	0.07733	0.681	0.04348	0.05256	0.05769	0.13045	0.16436	12.34	0.65936	0.60156	0.23297
16.836	73	1	76.91	0.00318	1.71E-05	0.0012	0.00122	0.0036	0.02122	0.213	0.01046	0.01136	0.0178	0.03139	0.003953	25.631	0.35735	0.57425	0.095174
17.797	73	1	98.597	0.00291	2.18E-05	0.00132	0.0017	0.00395	0.03667	0.338	0.01833	0.02267	0.0353	0.05499	0.014349	21.482	0.57981	0.588	0.14327
18.641	73	1	105.58	0.00615	3.21E-05	0.00318	0.00323	0.00955	0.01979	0.214	0.01017	0.01162	0.01612	0.0305	0.02445	21.984	0.46951	0.59931	0.23725
19.517	73	1	112.82	0.00562	3.07E-05	0.00294	0.00249	0.00883	0.04856	0.437	0.02842	0.02595	0.03339	0.08527	0.022419	19.418	0.42885	0.55967	0.11712
20.351	73	1	119.72	0.00297	1.43E-05	0.00147	0.00144	0.0044	0.02291	0.219	0.01164	0.01216	0.01789	0.03492	0.005151	27.449	0.40831	0.58389	0.11593
21.192	73	1	126.68	0.00517	2.55E-05	0.00229	0.00182	0.00687	0.01938	0.188	0.00975	0.01084	0.01858	0.02926	0.012834	24.517	0.54836	0.59011	0.2531
22.869	73	1	140.55	0.00213	2.10E-05	0.00075	0.00115	0.00226	0.03125	0.279	0.01153	0.01567	0.03207	0.03458	0.011368	23.877	0.45022	0.60111	0.095457
23.715	73	1	147.55	0.00376	1.97E-05	0.00157	0.00137	0.0047	0.01466	0.13	0.0074	0.00856	0.01211	0.0222	0.01021	26.293	0.41866	0.59422	0.14957
24.583	73	1	154.73	0.0037	1.84E-05	0.00192	0.00184	0.00575	0.02113	0.199	0.01214	0.0111	0.01395	0.03641	0.013907	24.692	0.36056	0.56521	0.13092
26.261	73	1	168.61	0.00396	2.06E-05	0.00202	0.00194	0.00606	0.01801	0.168	0.00931	0.01018	0.0129	0.02793	0.008622	23.745	0.39428	0.66006	0.1227
27.108	73	1	175.62	0.00636	6.54E-05	0.00264	0.00317	0.00793	0.038	0.374	0.01814	0.02344	0.0346	0.05442	0.035726	18.286	0.63741	0.66257	0.22016
16.072	73	1	6.5993	0.00499	2.29E-05	0.00269	0.00241	0.00807	0.02497	0.218	0.01289	0.01372	0.02064	0.03867	0.021862	21.797	0.4848	0.53554	0.15398
16.148	73	1	13.636	0.00295	1.54E-05	0.00157	0.00142	0.00471	0.01788	0.175	0.00873	0.00982	0.01531	0.02619	0.008932	23.456	0.50991	0.59765	0.17925
16.226	73	1	20.813	0.00316	1.83E-05	0.00132	0.00145	0.00397	0.02444	0.303	0.0107	0.01298	0.02275	0.0321	0.014279	24.623	0.51501	0.56242	0.10431
16.321	73	1	29.54	0.00416	1.89E-05	0.0024	0.00195	0.00719	0.02072	0.221	0.01039	0.0107	0.01707	0.03117	0.024471	27.293	0.32604	0.56163	0.093278
16.376	73	1	34.56	0.00599	2.90E-05	0.0032	0.00264	0.00961	0.01638	0.183	0.00847	0.00923	0.01142	0.02542	0.018882	24.229	0.41352	0.5794	0.14897
16.452	73	1	41.6	0.00244	1.17E-05	0.00097	0.00106	0.00292	0.01299	0.119	0.00537	0.00673	0.01065	0.01611	0.005112	26.941	0.47861	0.55745	0.1235
16.607	73	1	55.807	0.00327	1.62E-05	0.00155	0.00139	0.00464	0.01922	0.169	0.00988	0.01116	0.01414	0.02963	0.007228	25.116	0.38688	0.57933	0.12177
16.691	73	1	63.574	0.00367	1.88E-05	0.00203	0.00193	0.00609	0.02099	0.187	0.01186	0.012	0.01598	0.03557	0.013773	23.213	0.47096	0.56667	0.123
16.836	73	1	76.91	0.00678	3.58E-05	0.00333	0.00319	0.00998	0.03196	0.319	0.01685	0.0187	0.02773	0.05056	0.027453	22.202	0.49679	0.5692	0.18625
17.797	73	1	98.597	0.0068	4.01E-05	0.00341	0.00372	0.01023	0.04056	0.417	0.02287	0.02668	0.03376	0.06861	0.032608	20.114	0.51662	0.56784	0.21292
18.641	73	1	105.58	0.00384	1.95E-05	0.00198	0.00198	0.00595	0.01862	0.163	0.01018	0.01116	0.0139	0.03053	0.012053	22.836	0.45314	0.59526	0.22594
19.517	73	1	112.82	0.00692	3.71E-05	0.00318	0.00216	0.00953	0.02436	0.22	0.01356	0.01224	0.01849	0.04068	0.02532	23.483	0.51468	0.54857	0.30139
20.351	73	1	119.72	0.00559	3.89E-05	0.00263	0.00356	0.00789	0.03114	0.337	0.0158	0.01847	0.02412	0.04739	0.045163	21.896	0.48342	0.58144	0.18684
21.192	73	1	126.68	0.00472	2.61E-05	0.00272	0.0024	0.00817	0.01978	0.175	0.011	0.01146	0.01373	0.03299	0.012398	22.311	0.49529	0.62303	0.14502
22.869	73	1	140.55	0.00314	1.63E-05	0.00177	0.00132	0.00532	0.01603	0.14	0.00903	0.00817	0.0107	0.02709	0.006917	26.989	0.43829	0.5623	0.079042
23.715	73	1	147.55	0.00249	1.29E-05	0.0012	0.00125	0.00361	0.0132	0.122	0.00683	0.0077	0.01043	0.02049	0.006461	27.525	0.43336	0.59086	0.097282
24.583	73	1	154.73	0.00342	1.80E-05	0.00145	0.00168	0.00436	0.01971	0.175	0.01101	0.01105	0.01431	0.03302	0.01365	24.928	0.51029	0.57937	0.16384
26.261	73	1	168.61	0.0055	2.96E-05	0.00256	0.00238	0.00768	0.02844	0.262	0.01501	0.01638	0.02229	0.04502	0.017198	22.272	0.4873	0.63347	0.16031
27.108	73	1	175.62	0.00556	5.05E-05	0.00229	0.0029	0.00688	0.0372	0.375	0.01763	0.02163	0.03455	0.0529	0.03593	19.256	0.6914	0.65304	0.2433
6.5651	58	1	7.3458	0.003	1.62E-05	0.00155	0.00174	0.00464	0.01596	0.137	0.00842	0.00977	0.013	0.02527	0.005398	24.135	0.40943	0.66065	0.17793
7.1036	58	1	14.347	0.00357	1.98E-05	0.00185	0.00182	0.00554	0.01896	0.17	0.0107	0.01098	0.01334	0.03211	0.008353	22.353	0.38312	0.68223	0.16774
7.6466	58	1	21.406	0.00317	1.76E-05	0.00157	0.00174	0.00471	0.01254	0.109	0.00656	0.00748	0.01047	0.01968	0.004534	24.392	0.39998	0.68572	0.16558
8.1851	58	1	28.406	0.00321	1.77E-05	0.00137	0.0016	0.0041	0.01063	0.095	0.00549	0.00618	0.00819	0.01648	0.010169	25.468	0.40692	0.65359	0.16395
8.7208	58	1	35.371	0.00367	2.01E-05	0.00189	0.00193	0.00567	0.02019	0.199	0.01003	0.01196	0.01474	0.0301	0.014237	24.653	0.36836	0.66325	0.15901
9.2594	58	1	42.372	0.00338	1.81E-05	0.00146	0.00155	0.00439	0.01416	0.141	0.00726	0.00844	0.01017	0.02178	0.022569	25.194	0.44625	0.65885	0.18577
9.7995	58	1	49.393	0.00484	2.66E-05	0.00262	0.00241	0.00785	0.02043	0.201	0.01047	0.01195	0.014	0.03141	0.022144	22.884	0.37624	0.67013	0.15829
10.334	58	1	56.341	0.00352	1.88E-05	0.00188	0.00199	0.00563	0.01767	0.171	0.00985	0.01055	0.01353	0.02954	0.011583	24.118	0.42485	0.65919	0.11361
10.876	58	1	63.391	0.00488	2.66E-05	0.00225	0.00235	0.00674	0.01927	0.17	0.01031	0.01235	0.01666	0.03094	0.025316	21.669	0.44631	0.65322	0.23337
11.413	58	1	70.372	0.00338	1.82E-05	0.00175	0.00171	0.00524	0.01293	0.129	0.00671	0.00751	0.00966	0.02014	0.012747	23.668	0.37465	0.66891	0.17277
11.875	58	1	76.381	0.00367	2.00E-05	0.00179	0.00212	0.00537	0.00897	0.085	0.00433	0.00541	0.008	0.013	0.009875	25.095	0.33836	0.65258	0.21505
13.567	58	1	98.377	0.0027	1.46E-05	0.00121	0.00142	0.00364	0.01469	0.144	0.00695	0.0082	0.01013	0.02084	0.015812	24.633	0.45897	0.65164	0.12833
14.108	58	1	105.4	0.00363	1.99E-05	0.00158	0.00134	0.00473	0.01522	0.145	0.00798	0.00924	0.01217	0.02395	0.015826	25.863	0.43379	0.61908	0.19092
14.646	58	1	112.4	0.00312	1.63E-05	0.00134	0.00141	0.00402	0.01666	0.154	0.00866	0.00963	0.01103	0.02599	0.012985	25.405	0.4404	0.6232	0.1155
15.18	58	1	119.34	0.00261	1.43E-05	0.0012	0.00135	0.00359	0.0164	0.148	0.00869	0.0102	0.01252	0.02608	0.006789	24.886	0.42565	0.6539	0.1176
15.721	58	1	126.38	0.00394	2.15E-05	0.00228	0.00215	0.00683	0.01542	0.135	0.00819	0.01	0.01312	0.02458	0.006898	22.988	0.30882	0.67043	0.16558
16.261	58	1	133.39	0.0039	2.13E-05	0.00223	0.00201	0.0067	0.02301	0.223	0.01287	0.01344	0.01546	0.03862	0.01778	25.817	0.35065	0.62899	0.15352
16.801	58	1	140.41	0.00321	1.74E-05	0.00146	0.00172	0.00437	0.02627	0.229	0.01466	0.01594	0.01911	0.04398	0.012314	21.545	0.41494	0.60665	0.16727
17.334	58	1	147.34	0.00301	1.63E-05	0.00124	0.00137	0.00372	0.01436	0.124	0.00755	0.00893	0.00985	0.02264	0.009915	25.419	0.43502	0.63616	0.14004
17.872	58	1	154.34	0.00299	1.65E-05	0.00146	0.00145	0.00439	0.01357	0.119	0.00714	0.00802	0.01141	0.02141	0.00438	25.464	0.3919	0.65606	0.12141
18.417	58	1	161.42	0.00353	1.89E-05	0.00187	0.00169	0.00562	0.01351	0.118	0.00724	0.00763	0.00953	0.02171	0.007995	23.98	0.42103	0.65281	0.14745
18.953	58	1	168.39	0.00266	1.44E-05	0.00134	0.00139	0.00403	0.01557	0.138	0.00833	0.00953	0.01117	0.02498	0.006442	25.452	0.40967	0.65335	0.13042
19.491	58	1	175.39	0.00358	1.99E-05	0.00161	0.00168	0.00482	0.02201	0.201	0.01122	0.01337	0.01787	0.03365	0.010896	22.734	0.42592	0.57892	0.1413
6.5651	58	1	7.3465	0.00432	2.35E-05	0.00201	0.0023	0.00602	0.01478	0.149	0.00801	0.00825	0.01126	0.02403	0.018837	23.826	0.36301	0.64719	0.22227
7.1036	58	1	14.347	0.00243	1.35E-05	0.00112	0.00133	0.00335	0.01372	0.12	0.00756	0.00835	0.01009	0.02269	0.00412	25.063	0.30308	0.66371	0.12685
7.6466	58	1	21.406	0.09962	0.00019884	0.05451	0.05513	0.16352	0.21805	1.828	0.09388	0.1237	0.13595	0.28165	0.59134	3.295	0.65484	0.79554	0.6779
8.1851	58	1	28.407	0.00232	1.28E-05	0.00111	0.00119	0.00334	0.01348	0.117	0.00764	0.00828	0.00967	0.02291	0.003569	25.884	0.29165	0.63763	0.115
8.7209	58	1	35.372	0.00342	1.91E-05	0.00173	0.0019	0.0052	0.01318	0.123	0.00693	0.00732	0.00916	0.0208	0.014124	24.368	0.37797	0.66609	0.17371
9.2595	58	1	42.373	0.00641	3.50E-05	0.00357	0.0035	0.0107	0.01559	0.159	0.00819	0.00948	0.0113	0.02456	0.023573	24.412	0.3701	0.63283	0.16412
9.7995	58	1	49.393	0.00499	2.76E-05	0.00283	0.00277	0.00848	0.01312	0.117	0.00708	0.00767	0.00938	0.02124	0.014071	22.955	0.36484	0.64219	0.15124
10.334	58	1	56.342	0.00319	1.74E-05	0.00187	0.00169	0.0056	0.00865	0.076	0.00485	0.00518	0.00637	0.01456	0.003644	26.003	0.3076	0.63755	0.11275
10.876	58	1	63.392	0.00264	1.45E-05	0.00121	0.00137	0.00363	0.01273	0.118	0.0069	0.00773	0.0091	0.02071	0.008111	25.153	0.37699	0.66222	0.12621
11.413	58	1	70.372	0.00259	1.39E-05	0.0012	0.00134	0.0036	0.01144	0.108	0.0059	0.00671	0.00763	0.01769	0.010624	26.49	0.41963	0.65224	0.088667
11.875	58	1	76.381	0.00329	1.81E-05	0.00159	0.00161	0.00477	0.01689	0.166	0.00868	0.00895	0.00985	0.02603	0.015053	25.928	0.41564	0.62757	0.15754
13.568	58	1	98.378	0.00226	1.24E-05	0.00111	0.00121	0.00333	0.01033	0.093	0.00552	0.00601	0.00711	0.01656	0.009526	27.525	0.36612	0.61831	0.11868
14.108	58	1	105.4	0.00329	1.80E-05	0.00141	0.00126	0.00424	0.01482	0.136	0.00823	0.00907	0.01081	0.02469	0.011117	26.735	0.34553	0.62869	0.12229
14.646	58	1	112.4	0.00248	1.34E-05	0.00115	0.0013	0.00344	0.01372	0.119	0.00758	0.00834	0.00965	0.02275	0.003956	25.457	0.354	0.62777	0.1214
15.18	58	1	119.34	0.0024	1.33E-05	0.00107	0.00119	0.00321	0.0099	0.087	0.00514	0.00582	0.00709	0.01541	0.003673	27.799	0.35129	0.62804	0.11069
15.721	58	1	126.38	0.00281	1.55E-05	0.00147	0.00154	0.00442	0.01313	0.115	0.00732	0.00804	0.00972	0.02195	0.004024	25.512	0.32305	0.63329	0.11275
16.261	58	1	133.39	0.00256	1.41E-05	0.00128	0.00153	0.00384	0.01114	0.099	0.00565	0.00635	0.00825	0.01696	0.005724	26.686	0.34632	0.62664	0.14327
16.801	58	1	140.41	0.00415	2.28E-05	0.00208	0.0022	0.00625	0.02125	0.184	0.01156	0.01185	0.01453	0.03468	0.012274	22.462	0.39553	0.61519	0.16297
17.334	58	1	147.34	0.00255	1.38E-05	0.00135	0.00141	0.00405	0.03106	0.276	0.01727	0.01814	0.02023	0.05181	0.01949	23.297	0.36346	0.61294	0.11719
17.872	58	1	154.34	0.00254	1.38E-05	0.00119	0.00135	0.00356	0.01278	0.119	0.00665	0.00711	0.00987	0.01996	0.010512	27.647	0.42513	0.67633	0.1086
18.417	58	1	161.42	0.00293	1.55E-05	0.00161	0.00164	0.00483	0.00996	0.088	0.00567	0.00587	0.00726	0.017	0.005232	26.804	0.3168	0.63576	0.11518
18.953	58	1	168.39	0.00264	1.44E-05	0.00146	0.0015	0.00439	0.01807	0.16	0.01029	0.01105	0.01224	0.03087	0.008747	24.152	0.35503	0.66061	0.15218
19.491	58	1	175.39	0.00496	2.76E-05	0.00274	0.00247	0.00823	0.01187	0.105	0.00656	0.00738	0.00894	0.01967	0.011622	23.843	0.38992	0.65014	0.14682
6.5651	58	1	7.3465	0.00266	1.43E-05	0.00122	0.00137	0.00365	0.01451	0.136	0.00738	0.00837	0.01025	0.02213	0.007474	25.146	0.38947	0.64808	0.13365
7.1037	58	1	14.348	0.00461	2.55E-05	0.00245	0.00222	0.00736	0.01099	0.097	0.00611	0.00672	0.00796	0.01834	0.009746	24.028	0.34843	0.64287	0.12559
7.6466	58	1	21.406	0.00277	1.51E-05	0.00141	0.00139	0.00423	0.01069	0.094	0.00558	0.00681	0.00942	0.01673	0.004005	25.453	0.38008	0.66703	0.13684
8.1851	58	1	28.407	0.00349	1.92E-05	0.00154	0.00157	0.00462	0.01464	0.136	0.00798	0.00817	0.01013	0.02394	0.010627	24.249	0.39343	0.67165	0.18236
8.7209	58	1	35.372	0.00347	1.89E-05	0.00189	0.00182	0.00568	0.01806	0.174	0.00989	0.01057	0.01269	0.02966	0.011052	23.878	0.42928	0.67311	0.15281
9.2595	58	1	42.373	0.00219	1.21E-05	0.00106	0.00123	0.00318	0.01105	0.098	0.00587	0.00635	0.00839	0.01761	0.003823	26.117	0.35882	0.64266	0.12575
9.7995	58	1	49.394	0.00574	3.15E-05	0.0032	0.00259	0.00961	0.01328	0.117	0.00738	0.00786	0.0093	0.02214	0.012079	22.56	0.3285	0.64315	0.14612
10.334	58	1	56.342	0.00255	1.39E-05	0.0014	0.00144	0.00421	0.01142	0.097	0.00546	0.00635	0.00815	0.01638	0.004313	25.973	0.37787	0.66026	0.12339
10.876	58	1	63.392	0.00247	1.35E-05	0.00118	0.00124	0.00353	0.0132	0.114	0.00723	0.00777	0.00975	0.02168	0.004108	25.68	0.31477	0.67042	0.12583
11.413	58	1	70.372	0.00377	2.03E-05	0.00217	0.00194	0.00652	0.01264	0.129	0.0067	0.00671	0.00822	0.02011	0.014622	23.554	0.32231	0.62989	0.11935
11.875	58	1	76.381	0.00319	1.74E-05	0.00165	0.0018	0.00495	0.01282	0.116	0.0063	0.00678	0.00923	0.01889	0.013003	26.323	0.40145	0.66051	0.14076
13.568	58	1	98.378	0.00262	1.43E-05	0.00134	0.00148	0.00401	0.01963	0.179	0.01044	0.01075	0.015	0.03132	0.008406	26.065	0.35376	0.62516	0.15188
14.108	58	1	105.4	0.00271	1.48E-05	0.00146	0.00145	0.00437	0.01061	0.097	0.00543	0.00595	0.00764	0.01628	0.004426	25.397	0.30393	0.62168	0.11095
14.646	58	1	112.4	0.00478	2.54E-05	0.00249	0.00233	0.00747	0.02098	0.191	0.01135	0.01252	0.01484	0.03406	0.0136	23.055	0.40372	0.62501	0.15279
15.18	58	1	119.34	0.00253	1.40E-05	0.00112	0.00124	0.00335	0.00991	0.089	0.00504	0.00511	0.00769	0.01511	0.011803	27.015	0.38885	0.63042	0.11556
15.721	58	1	126.38	0.00248	1.36E-05	0.00131	0.00138	0.00394	0.01406	0.122	0.00796	0.00832	0.00966	0.02389	0.003072	26.26	0.30439	0.65554	0.098257
16.261	58	1	133.39	0.00287	1.58E-05	0.00165	0.00152	0.00494	0.01883	0.166	0.01031	0.01104	0.01327	0.03093	0.005321	25.814	0.37611	0.60201	0.12186
16.801	58	1	140.41	0.0024	1.32E-05	0.00118	0.00137	0.00354	0.01386	0.122	0.00756	0.00847	0.01073	0.02268	0.003811	25.659	0.30308	0.6185	0.1413
17.334	58	1	147.34	0.00284	1.55E-05	0.00138	0.0015	0.00414	0.03976	0.336	0.02306	0.02406	0.02465	0.06919	0.023289	22.439	0.39603	0.62568	0.10514
17.872	58	1	154.34	0.00236	1.29E-05	0.00123	0.00124	0.00368	0.01142	0.101	0.0057	0.00704	0.00945	0.01709	0.003719	27.924	0.34297	0.65789	0.11182
18.417	58	1	161.42	0.00184	9.75E-06	0.001	0.00101	0.003	0.01063	0.092	0.00622	0.00616	0.00746	0.01867	0.001986	28.149	0.28713	0.64111	0.083495
19.491	58	1	175.39	0.00277	1.53E-05	0.00145	0.00153	0.00434	0.01086	0.095	0.00585	0.00651	0.00833	0.01756	0.004425	26.815	0.41996	0.66175	0.12887
6.5652	58	1	7.3479	0.00365	1.97E-05	0.00207	0.00193	0.0062	0.01415	0.124	0.0078	0.00864	0.01038	0.02341	0.005327	23.569	0.31554	0.65589	0.13932
7.1038	58	1	14.349	0.00282	1.55E-05	0.0015	0.00151	0.0045	0.01438	0.126	0.00788	0.00834	0.01044	0.02365	0.010893	24.81	0.39932	0.67647	0.12264
7.6467	58	1	21.408	0.00317	1.74E-05	0.0014	0.00147	0.0042	0.01366	0.129	0.007	0.00829	0.01009	0.021	0.008124	26.825	0.35224	0.63781	0.12432
8.1853	58	1	28.409	0.00308	1.70E-05	0.00142	0.00153	0.00426	0.01493	0.132	0.00799	0.00898	0.01054	0.02396	0.006943	24.228	0.43276	0.661	0.13582
8.721	58	1	35.374	0.00355	1.97E-05	0.00156	0.00173	0.00469	0.01334	0.123	0.00688	0.00775	0.01099	0.02063	0.010899	24.17	0.40926	0.65657	0.16202
9.2596	58	1	42.374	0.00266	1.46E-05	0.0013	0.00138	0.00389	0.01324	0.12	0.00727	0.0081	0.01028	0.02181	0.007594	24.961	0.38926	0.66915	0.1266
9.7996	58	1	49.395	0.00389	2.09E-05	0.00202	0.00219	0.00607	0.01443	0.134	0.00746	0.00876	0.01047	0.02237	0.016496	22.738	0.35469	0.66191	0.12964
10.334	58	1	56.344	0.00295	1.57E-05	0.00154	0.00138	0.00462	0.0129	0.119	0.00641	0.00795	0.00979	0.01922	0.016195	25.223	0.44786	0.65406	0.111
10.876	58	1	63.394	0.0032	1.74E-05	0.00152	0.00172	0.00456	0.01623	0.146	0.0083	0.00936	0.01298	0.02489	0.012998	25.217	0.43963	0.67584	0.21106
11.413	58	1	70.374	0.00367	2.04E-05	0.00207	0.00187	0.00621	0.01238	0.108	0.00688	0.00733	0.00889	0.02063	0.006105	23.265	0.36349	0.65505	0.12342
11.876	58	1	76.383	0.00268	1.41E-05	0.00119	0.00151	0.00356	0.0126	0.119	0.00658	0.00731	0.00888	0.01973	0.009309	25.929	0.45308	0.655	0.14058
13.568	58	1	98.38	0.00305	1.67E-05	0.00135	0.0014	0.00406	0.01083	0.097	0.00541	0.00654	0.00831	0.01623	0.006939	25.157	0.41399	0.61852	0.13178
14.108	58	1	105.4	0.00226	1.22E-05	0.00104	0.00124	0.00313	0.01587	0.139	0.0092	0.00903	0.01099	0.02761	0.003466	25.91	0.29162	0.60867	0.13203
14.647	58	1	112.4	0.00407	2.21E-05	0.00155	0.00179	0.00466	0.01929	0.175	0.00975	0.01083	0.01527	0.02926	0.011938	22.743	0.44103	0.64587	0.1981
15.18	58	1	119.34	0.00235	1.29E-05	0.00123	0.00123	0.0037	0.01069	0.093	0.00588	0.0064	0.00776	0.01765	0.002962	26.149	0.32471	0.65934	0.115
15.721	58	1	126.38	0.00592	3.27E-05	0.00348	0.00304	0.01044	0.01524	0.157	0.00794	0.00868	0.01155	0.02382	0.028396	22.613	0.42275	0.67037	0.14403
16.261	58	1	133.39	0.00315	1.74E-05	0.00163	0.00166	0.00489	0.01462	0.13	0.00742	0.00803	0.01065	0.02225	0.004797	24.651	0.423	0.63833	0.12575
16.801	58	1	140.41	0.00308	1.69E-05	0.0014	0.0012	0.00421	0.0113	0.099	0.00528	0.00661	0.01011	0.01585	0.009764	26.996	0.35753	0.60653	0.12444
17.334	58	1	147.34	0.00326	1.80E-05	0.00164	0.00169	0.00493	0.01055	0.097	0.00551	0.00634	0.00788	0.01654	0.00567	24.757	0.4022	0.63727	0.14245
17.873	58	1	154.34	0.0035	1.91E-05	0.00192	0.00169	0.00577	0.01498	0.136	0.0082	0.00823	0.0105	0.02461	0.010456	25.21	0.44222	0.65885	0.13047
18.417	58	1	161.42	0.00259	1.41E-05	0.00118	0.00131	0.00353	0.01367	0.125	0.0075	0.00809	0.01094	0.0225	0.010197	26.246	0.39024	0.64036	0.13435
18.953	58	1	168.39	0.00302	1.65E-05	0.00161	0.00145	0.00482	0.01373	0.126	0.00748	0.00808	0.00979	0.02243	0.013194	25.51	0.37835	0.67335	0.12837
19.491	58	1	175.39	0.00263	1.43E-05	0.00132	0.00136	0.00395	0.01093	0.096	0.00571	0.00638	0.00806	0.01712	0.008815	27.015	0.35172	0.65594	0.11513
6.5653	58	1	7.3486	0.00231	9.47E-06	0.00098	0.00119	0.00294	0.02014	0.187	0.01059	0.01155	0.01484	0.03178	0.004667	28.362	0.46724	0.567	0.14811
7.1038	58	1	14.35	0.00358	1.67E-05	0.00173	0.00194	0.0052	0.02824	0.252	0.0142	0.01625	0.02284	0.04261	0.010895	23.601	0.4267	0.60442	0.21047
7.6468	58	1	21.408	0.00352	1.91E-05	0.00148	0.00168	0.00443	0.0228	0.212	0.01084	0.01279	0.02	0.03251	0.011529	23.358	0.43551	0.63558	0.16035
8.1853	58	1	28.409	0.00219	1.01E-05	0.00085	0.00103	0.00254	0.01476	0.147	0.00713	0.00784	0.01089	0.02139	0.017267	27.518	0.31734	0.57894	0.12723
8.721	58	1	35.374	0.00189	8.16E-06	0.00068	0.00091	0.00205	0.00823	0.086	0.00365	0.00416	0.00608	0.01096	0.006934	29.014	0.26589	0.58165	0.10562
9.2596	58	1	42.375	0.00241	1.00E-05	0.00095	0.00098	0.00285	0.01461	0.142	0.00628	0.00681	0.01186	0.01885	0.009861	28.032	0.54198	0.55998	0.12966
9.7996	58	1	49.395	0.00176	7.13E-06	0.00066	0.00086	0.00198	0.00609	0.069	0.00267	0.00337	0.00414	0.008	0.005428	28.445	0.35081	0.56227	0.11948
10.334	58	1	56.344	0.00151	6.25E-06	0.00074	0.00082	0.00222	0.00406	0.035	0.00214	0.00233	0.00299	0.00643	0.00175	28.563	0.37541	0.55984	0.092377
10.876	58	1	63.394	0.00199	8.05E-06	0.00104	0.00101	0.00313	0.00932	0.086	0.00548	0.00474	0.00569	0.01644	0.00449	27.189	0.31365	0.55287	0.082379
11.413	58	1	70.374	0.00253	1.29E-05	0.00108	0.00135	0.00324	0.01168	0.116	0.00564	0.00666	0.00866	0.01691	0.007756	26.196	0.44629	0.60601	0.13537
13.568	58	1	98.38	0.00191	9.79E-06	0.00084	0.00104	0.00252	0.00641	0.062	0.00289	0.00342	0.00435	0.00867	0.004836	28.732	0.35634	0.57351	0.10324
14.108	58	1	105.4	0.00208	9.44E-06	0.00078	0.00099	0.00233	0.01259	0.118	0.00608	0.00741	0.01072	0.01824	0.009959	28.03	0.33157	0.55604	0.10918
14.647	58	1	112.4	0.00191	8.31E-06	0.00078	0.00097	0.00235	0.01373	0.122	0.0068	0.00758	0.01031	0.02041	0.007728	28.666	0.3552	0.55166	0.1506
15.18	58	1	119.34	0.00276	1.36E-05	0.00127	0.00144	0.00381	0.0172	0.162	0.00925	0.00947	0.01306	0.02776	0.010129	26.195	0.42681	0.59413	0.15802
15.721	58	1	126.38	0.00351	1.73E-05	0.00166	0.00191	0.00497	0.02	0.181	0.01092	0.01207	0.01583	0.03277	0.014613	24.971	0.42361	0.58692	0.16626
16.261	58	1	133.39	0.00174	7.26E-06	0.00085	0.00089	0.00256	0.01022	0.089	0.00516	0.00593	0.0086	0.01548	0.001679	28.791	0.5292	0.53813	0.095174
16.801	58	1	140.41	0.00189	8.19E-06	0.00081	0.00089	0.00242	0.01066	0.094	0.00524	0.00593	0.00936	0.01571	0.005827	27.462	0.37509	0.55139	0.11139
17.334	58	1	147.34	0.00269	1.35E-05	0.00109	0.0014	0.00326	0.0083	0.082	0.0038	0.00475	0.00647	0.01141	0.015854	26.423	0.32898	0.59934	0.15164
17.873	58	1	154.34	0.00267	1.17E-05	0.00122	0.00132	0.00365	0.01419	0.124	0.00703	0.00762	0.00899	0.0211	0.009416	26.547	0.33655	0.57466	0.14237
18.417	58	1	161.43	0.00245	1.13E-05	0.00118	0.00142	0.00355	0.01434	0.121	0.00711	0.00808	0.01049	0.02133	0.007763	26.025	0.41676	0.57126	0.11985
18.953	58	1	168.39	0.00174	7.34E-06	0.00087	0.00099	0.0026	0.02114	0.187	0.01104	0.01451	0.01718	0.03312	0.003946	26.574	0.51103	0.57207	0.10562
19.491	58	1	175.39	0.00216	9.98E-06	0.00102	0.00107	0.00307	0.01389	0.124	0.00748	0.0085	0.01037	0.02244	0.004691	27.266	0.28775	0.58069	0.11859
6.5653	58	1	7.3486	0.00179	7.05E-06	0.00068	0.0009	0.00203	0.00818	0.078	0.0037	0.0044	0.0069	0.0111	0.00351	27.414	0.4808	0.54106	0.13455
7.1038	58	1	14.35	0.00269	1.24E-05	0.00138	0.00146	0.00413	0.0136	0.135	0.00625	0.00825	0.01141	0.01874	0.010167	26.193	0.31507	0.5635	0.13219
7.6468	58	1	21.408	0.00267	1.41E-05	0.00135	0.00148	0.00404	0.01235	0.109	0.00664	0.00739	0.00991	0.01992	0.003652	26.291	0.31585	0.60197	0.12796
8.1854	58	1	28.41	0.00167	7.65E-06	0.00068	0.00091	0.00204	0.00897	0.08	0.00464	0.00536	0.00734	0.01392	0.004132	28.246	0.27353	0.56042	0.1164
8.7211	58	1	35.374	0.00236	1.00E-05	0.00091	0.00103	0.00274	0.00984	0.092	0.00479	0.00543	0.00745	0.01437	0.00792	28.177	0.3861	0.5679	0.12229
9.2597	58	1	42.376	0.00178	7.17E-06	0.00069	0.00095	0.00206	0.00746	0.071	0.00378	0.00371	0.0049	0.01133	0.00448	28.087	0.29191	0.54286	0.13183
9.7997	58	1	49.396	0.00182	7.16E-06	0.0006	0.00081	0.0018	0.00516	0.052	0.00233	0.00266	0.00375	0.00698	0.005403	26.855	0.37128	0.55175	0.1565
10.334	58	1	56.344	0.0025	9.85E-06	0.001	0.00099	0.003	0.00552	0.052	0.00263	0.00288	0.00386	0.00789	0.00982	27.337	0.33414	0.55319	0.14016
10.876	58	1	63.394	0.00153	6.03E-06	0.00055	0.00069	0.00164	0.00549	0.056	0.00239	0.00267	0.00378	0.00718	0.004837	27.506	0.33285	0.54471	0.11093
11.413	58	1	70.374	0.00121	5.78E-06	0.00043	0.00063	0.00128	0.00344	0.03	0.00172	0.00205	0.0032	0.00515	0.001582	29.651	0.24934	0.5641	0.080358
11.876	58	1	76.383	0.00283	1.29E-05	0.00118	0.00094	0.00353	0.00636	0.063	0.00286	0.00328	0.00407	0.00858	0.018894	30.434	0.30422	0.5754	0.092937
13.568	58	1	98.381	0.00231	1.12E-05	0.00102	0.00137	0.00307	0.00791	0.103	0.00353	0.00426	0.00594	0.0106	0.007956	26.841	0.37935	0.57012	0.12995
14.108	58	1	105.4	0.00205	9.13E-06	0.00083	0.00088	0.00248	0.00779	0.076	0.00307	0.00352	0.00586	0.00921	0.008942	28.268	0.30354	0.54855	0.11688
14.647	58	1	112.41	0.00176	7.56E-06	0.00079	0.00087	0.00236	0.00876	0.08	0.00379	0.00431	0.0067	0.01138	0.004737	28.491	0.42645	0.53991	0.098571
15.18	58	1	119.34	0.00271	1.30E-05	0.00099	0.00136	0.00297	0.01362	0.139	0.00634	0.00677	0.00763	0.01902	0.014627	27.121	0.42294	0.56833	0.20982
15.722	58	1	126.38	0.00223	1.09E-05	0.00104	0.0012	0.00311	0.00934	0.083	0.00472	0.00559	0.00818	0.01417	0.004714	27.12	0.37834	0.55621	0.13589
16.261	58	1	133.39	0.00158	6.49E-06	0.0006	0.00064	0.0018	0.01501	0.135	0.00728	0.00724	0.01069	0.02184	0.004666	28.255	0.55522	0.53419	0.10495
16.801	58	1	140.41	0.00274	1.14E-05	0.0011	0.00125	0.0033	0.01517	0.141	0.00743	0.00805	0.01154	0.02228	0.01419	25.164	0.54513	0.54155	0.17104
17.334	58	1	147.34	0.00479	2.32E-05	0.00208	0.00235	0.00623	0.01529	0.155	0.00831	0.00763	0.00989	0.02494	0.037942	26.574	0.33551	0.58658	0.22115
17.873	58	1	154.34	0.00144	6.18E-06	0.00066	0.00073	0.00199	0.0075	0.064	0.00388	0.00432	0.00604	0.01164	0.000993	32.006	0.27328	0.55696	0.095174
18.417	58	1	161.43	0.00193	8.70E-06	0.0009	0.00111	0.00269	0.01222	0.133	0.00482	0.00598	0.01032	0.01446	0.010531	29.058	0.30348	0.54164	0.12722
18.953	58	1	168.39	0.00555	2.02E-05	0.00297	0.00331	0.00892	0.02069	0.476	0.01046	0.01173	0.01556	0.03137	0.049848	24.327	0.60738	0.54885	0.20252
19.491	58	1	175.39	0.0012	5.41E-06	0.00053	0.00063	0.00158	0.00807	0.07	0.00438	0.00473	0.00607	0.01313	0.001389	30.483	0.24663	0.55885	0.083495
9.3273	65	0	26.473	0.00508	3.58E-05	0.00259	0.00266	0.00778	0.03476	0.296	0.01836	0.02056	0.02792	0.05507	0.018587	22.511	0.4942	0.71232	0.20795
9.9456	65	0	33.506	0.00377	2.48E-05	0.00185	0.00197	0.00555	0.05741	0.442	0.02821	0.0342	0.04834	0.08462	0.018216	20.825	0.67209	0.67492	0.15013
10.559	65	0	40.481	0.00412	3.11E-05	0.00218	0.00209	0.00654	0.05759	0.544	0.03168	0.03063	0.04635	0.09505	0.013071	21.083	0.65937	0.70809	0.1825
11.789	65	0	54.469	0.00404	2.94E-05	0.00175	0.00169	0.00525	0.03274	0.268	0.01772	0.01804	0.02631	0.05315	0.012617	25.899	0.60989	0.64045	0.14206
13.044	65	0	68.752	0.00487	3.00E-05	0.00282	0.00243	0.00845	0.07713	0.745	0.04679	0.03765	0.04843	0.14038	0.015635	21.059	0.70104	0.67956	0.16219
13.636	65	0	75.488	0.00309	1.88E-05	0.00162	0.00156	0.00485	0.02045	0.172	0.01109	0.01169	0.01415	0.03327	0.010355	26.122	0.48	0.6847	0.10136
14.25	65	0	82.467	0.00355	2.07E-05	0.00153	0.00155	0.00458	0.01765	0.156	0.00858	0.01032	0.01565	0.02575	0.012329	25.928	0.55922	0.59356	0.14651
14.863	65	0	89.439	0.00193	1.11E-05	0.00076	0.00102	0.00229	0.00891	0.083	0.00404	0.00463	0.00676	0.01211	0.005918	27.03	0.49834	0.53413	0.11729
[truncated: 3,876 more rows]
