# Supplementary material for: A methodology for the design of experiments in computational intelligence with multiple regression models
Source: PeerJ. 2016 Dec 1;4:e2721. doi: 10.7717/peerj.2721 (PMC5136129; doi:10.7717/peerj.2721)
Supplement: Data S1 — Datailed results from UC Irvine Machine Learning Repository (Housing, Machine CPU, Wine Quality, Automobile and Parkinson) and the 3 Use Cases (Protein Corona, Gajewicz Metal Oxides and Aquatic Toxicity) [file peerj-04-2721-s001.zip › 0_datasets/ds.pcorona.csv]

net.c	P01024	P01834	P0C0L4	P02647	P01871	P01857	P02649	B9A064	P10909	P01876	P04004	Q14624	P01009	P04114	P00734	P0C0L5	P01766	P01008	P04196	P02652	P04003	P02766	P01860	P01023	P01859	P01620	P0CG05	P01042	P02656	P00739	P05154	P02743	P06396	P02787	Q92954	P55056	P08697	P08603	P06727	P19823	P12259	P04220	P10720	P05546	P49908	P35542	P68871	Q03591	P02735
-5.18390005	0.073492144	0.011657375	0.027369488	0.004561581	0.016725798	0.014698429	0.085656361	0.003547897	0.012671059	0.008109478	0.033451597	0.002534212	0.006588951	0.079574252	0.061834769	0.001520527	0.000506842	0.112012164	0.044095286	0.003041054	0.031931069	0.002027369	0.005068424	0.011657375	0.003547897	0.001520527	0.007095793	0.020273695	0	0.002027369	0.01064369	0.031424227	0.006588951	0	0.023314749	0	0.001013685	0.021794222	0	0.009123163	0.004054739	0.000506842	0.001520527	0.007602636	0.003041054	0	0	0.002027369	0
-1.00853711	0.021656535	0.015957447	0.055091185	0.007978723	0.018237082	0.015577508	0.001899696	0.002659574	0.005319149	0.011398176	0.021656535	0.00493921	0.016717325	0.021276596	0.263677812	0.007598784	0.000759878	0.047112462	0.001899696	0.003039514	0.127279635	0.004179331	0.001139818	0.004559271	0.001139818	0.001139818	0.005319149	0	0.000379939	0.001899696	0	0.002659574	0.000379939	0.004559271	0	0	0.003419453	0	0.001139818	0.005319149	0.002659574	0.005699088	0.000379939	0	0	0	0	0	0
-5.504386695	0.08105939	0.005617978	0.017656501	0.005617978	0.008025682	0.003210273	0.107544141	0.001605136	0.00882825	0.005617978	0.085072231	0.002407705	0.006420546	0.016853933	0.123595506	0.001605136	0	0.313001605	0.031300161	0.010433387	0	0.004815409	0.001605136	0.00882825	0	0	0	0.016853933	0	0	0.010433387	0.016051364	0.002407705	0	0.00882825	0	0.007223114	0	0	0.003210273	0	0.000802568	0.006420546	0.016051364	0.003210273	0	0	0.005617978	0
-5.676687582	0.084718923	0.011876485	0.015835313	0.007125891	0.015043547	0.004750594	0.102137767	0.005542359	0.005542359	0.006334125	0.071258907	0.003958828	0.003167063	0.026128266	0.106096595	0.002375297	0.000791766	0.288202692	0.040380048	0.006334125	0.001583531	0.003958828	0.000791766	0.004750594	0.000791766	0	0.004750594	0.017418844	0	0	0.011876485	0.053840063	0.004750594	0	0.008709422	0	0.005542359	0.007125891	0	0	0	0.000791766	0.003958828	0.009501188	0.001583531	0	0	0.010292953	0
-1.315665982	0.024524313	0.014799154	0.054968288	0.012684989	0.016490486	0.006342495	0.012262156	0.002536998	0.008033827	0.009302326	0.095560254	0.002536998	0.01987315	0.023678647	0.226638478	0.005496829	0.000422833	0.043128964	0.001691332	0.003382664	0.101057082	0.024524313	0.002114165	0.005496829	0.000845666	0	0.002536998	0	0.000422833	0.002114165	0.001268499	0.002114165	0	0.002114165	0	0	0.007610994	0	0.005496829	0.010993658	0.005919662	0.00422833	0	0.002114165	0	0	0.000845666	0	0
-7.13796526	0.043650794	0.005952381	0.034391534	0.008597884	0.006613757	0.014550265	0.010582011	0.003306878	0.007936508	0.007936508	0.054232804	0.022486772	0.009920635	0	0.141534392	0.001322751	0.001322751	0.185846561	0.072089947	0	0	0.003306878	0.00462963	0.011904762	0.001984127	0	0.00462963	0.056878307	0	0.001322751	0.033068783	0.068121693	0.005291005	0.001322751	0.031084656	0	0.002645503	0.003968254	0	0.005291005	0.005291005	0	0.002645503	0.010582011	0.001984127	0	0	0.003968254	0
-5.419815916	0.127461707	0.028993435	0.038840263	0.018052516	0.011487965	0.032275711	0.012035011	0.013676149	0.007658643	0.019693654	0.037199125	0.064551422	0.006564551	0.007658643	0.024617068	0	0.002188184	0.085339168	0.019146608	0.00273523	0.010393873	0.001094092	0.007111597	0.010940919	0.006564551	0.004376368	0.012035011	0.074945295	0.006017505	0	0.028446389	0.001094092	0.024617068	0.028446389	0.012582057	0.003282276	0.006017505	0.04321663	0.006017505	0.00547046	0	0	0	0.002188184	0.000547046	0	0	0.004376368	0.000547046
-5.862286645	0.091865358	0.019635344	0.074333801	0.047685835	0.00911641	0.021037868	0.01542777	0.00911641	0.010518934	0.021037868	0.036465638	0.025245442	0.0371669	0.04628331	0.0371669	0.003506311	0.000701262	0.066619916	0.011921459	0.010518934	0.001402525	0.007713885	0.004207574	0.011220196	0.003506311	0.000701262	0.005610098	0.050490884	0.009817672	0.002103787	0.010518934	0	0.01542777	0.013323983	0.026647966	0.002805049	0.00631136	0.021037868	0.02454418	0.01542777	0.003506311	0.004207574	0	0.003506311	0.000701262	0.002103787	0.000701262	0.002103787	0.000701262
-7.294490912	0.103219697	0.039772727	0.026515152	0.047348485	0.03125	0.026515152	0.015151515	0.005681818	0.023674242	0.018939394	0.018939394	0.007575758	0.053030303	0.303030303	0.011363636	0.003787879	0.002840909	0.019886364	0	0.012310606	0.001893939	0.016098485	0.005681818	0.005681818	0.005681818	0.002840909	0.012310606	0	0.00094697	0.010416667	0	0	0.002840909	0.019886364	0	0.002840909	0	0	0.016098485	0.010416667	0	0.010416667	0	0	0	0.013257576	0.002840909	0	0
-7.590049746	0.092989986	0.022174535	0.026466381	0.057939914	0.017167382	0.011444921	0.015736767	0.005722461	0.04434907	0.02360515	0.030042918	0.039341917	0.034334764	0.178111588	0.032904149	0.002145923	0.000715308	0.048640916	0.007868383	0.015736767	0.00286123	0.005007153	0.00286123	0.005007153	0.00286123	0.001430615	0.007153076	0.033619456	0.012160229	0.004291845	0.004291845	0	0.008583691	0.010729614	0.005007153	0.00286123	0.005722461	0.001430615	0.018597997	0.010729614	0	0.00286123	0	0	0	0.012160229	0.002145923	0	0.005007153
-1.127557324	0.043281654	0.025193798	0.033591731	0.013565891	0.023901809	0.016795866	0.004521964	0.005813953	0.010981912	0.018087855	0.160852713	0.003229974	0.052325581	0.054909561	0.01744186	0.010335917	0.000645995	0.00129199	0.002583979	0.005167959	0.024547804	0.008397933	0.003229974	0.029715762	0.003875969	0.000645995	0.007105943	0	0.001937984	0.005813953	0.007751938	0.000645995	0.002583979	0.009689922	0	0	0.01744186	0	0.000645995	0.103359173	0.005813953	0.006459948	0	0	0	0	0.000645995	0	0
-6.121800441	0.044052863	0.013215859	0.008810573	0.083700441	0.013215859	0.030837004	0.008810573	0.013215859	0.070484581	0.017621145	0.017621145	0	0.017621145	0.264317181	0.008810573	0	0	0.114537445	0	0.052863436	0.004405286	0	0	0	0	0	0.008810573	0	0.008810573	0	0	0	0	0	0	0	0	0	0.030837004	0	0	0	0	0	0	0.022026432	0.004405286	0	0
-6.803896602	0.125886525	0.026004728	0.01891253	0.063829787	0.026004728	0.026595745	0.046099291	0.013002364	0.088652482	0.015957447	0.042553191	0.004137116	0.010047281	0.242907801	0.014184397	0.000591017	0.002955083	0.023640662	0.001182033	0.017730496	0.002955083	0.001182033	0.002955083	0.000591017	0.007683215	0.00177305	0.007683215	0.005910165	0.012411348	0.002955083	0	0	0.007092199	0.002955083	0	0.006501182	0	0	0.010638298	0	0	0	0	0	0	0.021276596	0.004728132	0	0.00177305
-7.675949819	0.107542942	0.01867065	0.044062733	0.045556385	0.01493652	0.024645258	0.023898432	0.005227782	0.035847647	0.008961912	0.023151606	0.046303211	0.017923824	0.15459298	0.013442868	0.000746826	0.000746826	0.034353996	0.014189694	0.009708738	0.00373413	0.005974608	0.004480956	0.004480956	0.006721434	0.001493652	0.008961912	0.032860344	0.005974608	0.00746826	0.006721434	0	0.023151606	0.025392084	0.005974608	0.008215086	0	0.005227782	0.024645258	0.010455564	0	0.000746826	0	0	0	0.011949216	0.005974608	0.000746826	0.009708738
-6.083141235	0.036287924	0.008328376	0.007733492	0.00594884	0.00594884	0.008328376	0.033313504	0.002379536	0.00297442	0.006543724	0.0743605	0.019631172	0.014277216	0.001189768	0.076145152	0.001784652	0.000594884	0.161213563	0.148720999	0.00297442	0.001189768	0.00297442	0.000594884	0.01784652	0	0.000594884	0.000594884	0.157644259	0	0	0.00892326	0.001784652	0.001784652	0	0.010707912	0.000594884	0.007138608	0.000594884	0	0.000594884	0.002379536	0	0.004164188	0.009518144	0.004164188	0.001784652	0.001784652	0.001784652	0
-5.361119869	0.085790885	0.016085791	0.042001787	0.026809651	0.013851653	0.013404826	0.018766756	0.005808758	0.023681859	0.025022341	0.021894549	0.113941019	0.009830206	0.00536193	0.024575514	0.000446828	0.000893655	0.060321716	0.018766756	0.004915103	0.006702413	0.004021448	0.004915103	0.016979446	0.003127793	0.001340483	0.00714924	0.059428061	0.010277033	0.00178731	0.019660411	0	0.023235031	0	0.025022341	0.007596068	0.004915103	0.045576408	0.012064343	0.002234138	0.006255585	0.000446828	0.000893655	0.001340483	0.001340483	0.009830206	0.004915103	0.004915103	0.008042895
-4.975283173	0.059633028	0.008409786	0.03058104	0.006116208	0.008409786	0.00382263	0.117737003	0.00382263	0.006116208	0.006116208	0.061926606	0.002293578	0.003058104	0.02293578	0.116207951	0.002293578	0	0.279051988	0.012996942	0.009174312	0.028287462	0.003058104	0.000764526	0.005351682	0	0	0	0.014525994	0	0	0.012232416	0.024464832	0.00382263	0	0.006116208	0	0.004587156	0	0	0.001529052	0	0	0.006116208	0.009938838	0.002293578	0.001529052	0	0.000764526	0
-0.270329774	0.054498715	0.015938303	0.013881748	0.031876607	0.021079692	0.01285347	0.029305913	0.002570694	0.098200514	0.013881748	0.051928021	0.004113111	0.099742931	0.150642674	0.028277635	0.002570694	0.000514139	0.029305913	0	0.015424165	0.000514139	0.027249357	0.001028278	0.005141388	0.002056555	0.000514139	0.007197943	0	0.003598972	0.01285347	0	0	0.002056555	0.006169666	0	0.002056555	0.005655527	0	0.02622108	0.009768638	0.001028278	0.004113111	0	0.002570694	0	0.008226221	0.004627249	0	0.000514139
-5.963982042	0.073003802	0.00608365	0.013688213	0.003802281	0.00608365	0.003041825	0.101901141	0.000760456	0.005323194	0.005323194	0.120912548	0.008365019	0.006844106	0.003802281	0.121673004	0.002281369	0	0.306463878	0.091254753	0.003041825	0	0.005323194	0	0.003802281	0	0	0	0.019771863	0	0	0.006844106	0	0	0	0.004562738	0.010646388	0.003802281	0	0	0	0.029657795	0	0.003802281	0.014448669	0.002281369	0	0	0.002281369	0
-6.142034924	0.075641915	0.011797363	0.026370576	0.009021513	0.009715475	0.006939625	0.052047189	0.004857738	0.002081888	0.004857738	0.102012491	0.022206801	0.006245663	0.003469813	0.081193616	0.002081888	0.000693963	0.144344205	0.044413602	0.00277585	0.009715475	0.002081888	0	0.012491325	0	0	0	0.13462873	0	0	0.012491325	0.004163775	0.004163775	0	0.003469813	0	0.002081888	0	0	0	0	0	0.0055517	0.004857738	0.002081888	0	0	0	0
-5.381423032	0.024640657	0.015742642	0.030800821	0.004791239	0.011635866	0.004791239	0.080082136	0.003422313	0.002737851	0.006844627	0.048596851	0.004106776	0.008898015	0.010951403	0.147843943	0.005475702	0.000684463	0.123887748	0.014373717	0.005475702	0.088295688	0.002737851	0.001368925	0.001368925	0	0.000684463	0.001368925	0.052019165	0	0	0.004791239	0.016427105	0	0	0.002737851	0	0.004106776	0	0	0	0	0.004106776	0.002737851	0.006844627	0.001368925	0	0	0	0
-3.199321632	0.050364964	0.010948905	0.035036496	0.005839416	0.008759124	0.005839416	0.018978102	0.002919708	0.002919708	0.008759124	0.055474453	0.024817518	0.028467153	0.017518248	0.05620438	0.001459854	0	0.170072993	0.000729927	0.002189781	0.008759124	0.000729927	0	0.009489051	0	0	0.002189781	0.141605839	0	0	0.009489051	0.006569343	0	0	0.008759124	0	0.008029197	0	0	0.000729927	0	0	0.005109489	0.002189781	0.003649635	0	0	0	0
-5.928402063	0.067915691	0.004683841	0.015612802	0.00312256	0.004683841	0.00312256	0.110070258	0.00312256	0.007806401	0.005464481	0.084309133	0.00234192	0.007806401	0.012490242	0.119437939	0.00312256	0	0.334894614	0.042935207	0.008587041	0	0.004683841	0.00156128	0.010148322	0	0	0	0.021857923	0	0	0.010148322	0.004683841	0.00312256	0	0.009367681	0.00078064	0.006245121	0.00234192	0	0.00234192	0.004683841	0	0.003903201	0.014832162	0.003903201	0	0	0.007025761	0
-5.73542754	0.030010173	0.013733469	0.041200407	0	0.023906409	0.00508647	0.060020346	0.005595117	0.003051882	0.006612411	0.029501526	0.002543235	0.008646999	0.004577823	0.138351984	0.002543235	0.001017294	0.062054934	0.04069176	0.001017294	0.145981689	0.000508647	0.000508647	0	0	0.002543235	0.006612411	0.012716175	0	0	0.000508647	0.066632757	0	0	0	0	0	0	0	0	0	0.001525941	0.005595117	0	0	0	0	0	0
-5.778333231	0.026966292	0.017228464	0.052434457	0.005243446	0.024719101	0.006741573	0.046441948	0.005243446	0.002996255	0.0082397	0.044194757	0	0.003745318	0.002247191	0.100374532	0.0082397	0.000749064	0.123595506	0.05093633	0.001498127	0.137078652	0.001498127	0.002247191	0	0	0.000749064	0.003745318	0.016479401	0	0	0.002996255	0.026217228	0	0	0.002247191	0.005243446	0.003745318	0	0	0	0	0.001498127	0.004494382	0.005992509	0.000749064	0	0	0	0
-5.395928676	0.033498759	0.016129032	0.036600496	0.003722084	0.021091811	0.006823821	0.109801489	0.006823821	0.004962779	0.008064516	0.03101737	0.005583127	0.015508685	0.009925558	0.155707196	0.003101737	0.000620347	0.064516129	0.016129032	0.003722084	0.104218362	0.000620347	0.000620347	0	0.001240695	0.001861042	0.006823821	0.032878412	0	0	0.001240695	0.034739454	0	0	0	0	0	0	0	0	0	0.001240695	0.006203474	0	0	0	0	0	0
-6.104821487	0.03617945	0.015195369	0.037626628	0.005065123	0.013024602	0.007959479	0.073806078	0.004341534	0.002894356	0.007959479	0.047756874	0.005065123	0.012301013	0.017366136	0.162083936	0.005788712	0.000723589	0.087554269	0.002894356	0.003617945	0.109261939	0.000723589	0.002170767	0.001447178	0	0.000723589	0	0.02170767	0	0	0.002894356	0.018089725	0	0	0.001447178	0	0.002170767	0	0	0	0	0.005788712	0	0	0.001447178	0	0	0	0
-4.846843212	0.030448718	0.015224359	0.040064103	0.006410256	0.023237179	0.005608974	0.06650641	0.006410256	0.002403846	0.006410256	0.065705128	0	0.00400641	0.002403846	0.100961538	0.005608974	0.000801282	0.157852564	0.061698718	0.004807692	0.084134615	0.000801282	0.000801282	0.001602564	0	0.000801282	0.002403846	0.026442308	0	0	0.005608974	0.016025641	0	0	0.009615385	0.002403846	0.005608974	0	0	0	0	0.004807692	0.00400641	0.010416667	0	0	0	0.002403846	0
0.112753503	0.039417309	0.023993145	0.145672665	0.005998286	0.015424165	0.010282776	0.00428449	0.005141388	0.010282776	0.005998286	0.070265638	0.011996572	0.036846615	0.021422451	0.033419023	0.007712082	0.001713796	0.057412168	0	0	0.006855184	0.009425878	0.001713796	0.050556984	0	0.000856898	0.003427592	0	0.000856898	0	0.010282776	0	0	0	0	0	0.018851757	0	0	0.088260497	0.007712082	0	0	0.003427592	0	0	0	0	0
-8.587272661	0.086956522	0.016197783	0.017902813	0.05029838	0.026427962	0.013640239	0.05029838	0.004262575	0.10400682	0.008525149	0.017902813	0.005967604	0.017050298	0.26001705	0.008525149	0.000852515	0.00170503	0.014492754	0.00170503	0.018755328	0	0.00511509	0.00341006	0.002557545	0.00511509	0.00170503	0.008525149	0.00170503	0.018755328	0.010230179	0	0	0.00341006	0.002557545	0	0.016197783	0	0	0.028985507	0.011082694	0	0	0	0	0	0.033248082	0.005967604	0	0.028132992
-6.223778074	0.076566125	0.003093581	0.006960557	0.034802784	0.003093581	0.003866976	0.131477185	0.003093581	0.010827533	0.005413766	0.068058778	0.006960557	0.006960557	0.023975251	0.113689095	0.00154679	0	0.306264501	0.047177108	0.016241299	0	0.003093581	0.000773395	0.006960557	0	0	0	0.00154679	0.000773395	0	0.007733952	0.003866976	0.003093581	0	0.009280742	0.011600928	0.007733952	0.014694509	0.004640371	0.002320186	0.004640371	0	0	0.013921114	0.003093581	0.010827533	0	0.003866976	0.00154679
-6.16773377	0.069390902	0.00616808	0.00925212	0.036237471	0.00308404	0.00385505	0.118735544	0.00308404	0.00925212	0.00616808	0.066306862	0.00539707	0.00616808	0.033924441	0.112567463	0.00385505	0	0.32536623	0.047802621	0.01387818	0	0.00385505	0	0.00693909	0	0	0	0.00539707	0	0	0.01002313	0.00385505	0.00308404	0	0.00693909	0.01310717	0.00539707	0.01079414	0	0	0.00462606	0	0.00231303	0.01079414	0.00231303	0.00848111	0	0.00616808	0.00231303
-5.40323656	0.060781476	0.008683068	0.006512301	0.113603473	0.005788712	0.006512301	0.128075253	0.002894356	0.020260492	0.005788712	0.056439942	0.005788712	0.005788712	0.083936324	0.113603473	0.001447178	0	0.247467438	0.002894356	0.017366136	0.004341534	0.001447178	0.002170767	0.002894356	0	0	0	0	0.001447178	0.001447178	0.009406657	0.001447178	0	0.000723589	0.001447178	0.009406657	0.005788712	0	0.020260492	0.004341534	0.000723589	0	0	0.010853835	0.001447178	0.005788712	0.001447178	0	0.004341534
-6.360527022	0.065420561	0.007009346	0.007593458	0.035630841	0.004672897	0.004672897	0.157126168	0.002336449	0.005841121	0.004088785	0.094042056	0.005841121	0.005257009	0.00817757	0.163551402	0.002336449	0.000584112	0.244158879	0.058995327	0.011682243	0	0.004672897	0	0.002920561	0.001168224	0.000584112	0.001168224	0.004672897	0.000584112	0	0.007593458	0.004088785	0.002920561	0	0.011098131	0.011098131	0.003504673	0.003504673	0.001168224	0.000584112	0.003504673	0	0.001752336	0.014018692	0.000584112	0.015771028	0	0.002336449	0.004088785
-2.765228927	0.043713384	0.011266336	0.008111762	0.199639477	0.009914376	0.004506534	0.047318612	0.004055881	0.098693105	0.011266336	0.075709779	0.01306895	0.022983326	0.078864353	0.042812078	0	0	0.045515998	0	0.041910771	0	0.00135196	0.000450653	0	0	0	0.003154574	0.016223524	0.020730059	0.004055881	0.006759802	0	0	0.001802614	0.008111762	0.015772871	0	0	0.045065345	0	0.000450653	0	0	0	0.000450653	0.020279405	0.004957188	0	0.008111762
-0.980056174	0.053648915	0.01617357	0.033925049	0.019329389	0.01025641	0.010650888	0.01183432	0.003550296	0.011439842	0.018145957	0.057988166	0.01025641	0.030374753	0.001972387	0.125443787	0.004733728	0.000394477	0.063905325	0.017751479	0.00591716	0.036291913	0.024063116	0.002761341	0.00591716	0.001577909	0.000394477	0.006311637	0.028402367	0.007495069	0.002761341	0.001183432	0.001183432	0.011045365	0.005128205	0.002761341	0.000788955	0.006311637	0.017751479	0.016962525	0.032741617	0.011045365	0.002761341	0	0.001972387	0.000394477	0	0.001577909	0	0.002366864
-1.292157197	0.017656501	0.013804173	0.05682183	0.005457464	0.014446228	0.013162119	0	0.003210273	0.005457464	0.013483146	0.028250401	0.002568218	0.026324238	0.012520064	0.159229535	0.0070626	0.000642055	0.020224719	0.000642055	0.002247191	0.126484751	0.004494382	0.000963082	0.028892456	0.001605136	0.000642055	0.005457464	0.000963082	0.000321027	0.002247191	0.002568218	0.0035313	0	0.004494382	0	0	0.009630819	0	0	0.043980738	0.0105939	0.004494382	0	0	0.000321027	0	0	0	0
-5.303578785	0.111352526	0.02661597	0.039652363	0.016295492	0.006518197	0.022270505	0.017925041	0.004888647	0.010320478	0.013579576	0.029331885	0.071700163	0.006518197	0.003802281	0.033134166	0.000543183	0.000543183	0.072786529	0.031504617	0.003259098	0.007604563	0.000543183	0.004888647	0.007604563	0.001629549	0.002172732	0.005431831	0.108093427	0.004345464	0.001086366	0.019011407	0.002172732	0.02498642	0.016295492	0.016295492	0.002715915	0.005431831	0.049429658	0.006518197	0.005975014	0	0.002715915	0	0.004345464	0.001086366	0	0	0.009777295	0.002172732
-6.26867771	0.073492981	0.004128819	0.009083402	0.025598679	0	0.003303055	0.128819158	0.000825764	0.009909166	0.005780347	0.075144509	0.006606111	0.005780347	0.009083402	0.1164327	0.002477291	0	0.332782824	0.047894302	0.015689513	0	0.004128819	0.000825764	0.007431874	0	0	0	0.018166804	0	0	0.009083402	0.000825764	0.003303055	0	0.009083402	0.003303055	0.007431874	0.006606111	0.003303055	0	0.001651528	0	0.004954583	0.011560694	0.004128819	0.009083402	0.000825764	0.004128819	0
-0.965756107	0.019167835	0.017297803	0.045348294	0.003272557	0.014492754	0.01542777	0.001402525	0.003272557	0.008882655	0.013090229	0.039270687	0.004207574	0.023375409	0.000935016	0.122487144	0.005610098	0.000935016	0.014025245	0.001402525	0.001870033	0.081813932	0.006545115	0.002337541	0.026647966	0.001870033	0.000935016	0.004675082	0	0	0.001402525	0.002805049	0.000935016	0	0.000467508	0	0	0.011220196	0	0	0.083216456	0.009817672	0.00514259	0	0	0	0	0.000467508	0	0
-7.930160375	0.059276823	0.023117961	0.036158862	0.005927682	0.029045643	0.025489034	0.009484292	0.010669828	0.021932424	0.023710729	0.023710729	0.142857143	0.009484292	0.001185536	0.029045643	0.001185536	0.004742146	0.080616479	0.029045643	0	0.002963841	0.002963841	0.006520451	0.019561352	0.018968583	0.001778305	0.011262596	0.091286307	0.002371073	0.002371073	0.01659751	0	0.001778305	0.002963841	0.019561352	0.01007706	0.003556609	0.017190279	0	0	0.008298755	0.001185536	0.000592768	0.002371073	0.001185536	0.016004742	0.004149378	0.004149378	0.007705987
-6.021862958	0.121399927	0.022238425	0.067444404	0.006926723	0.011666059	0.013488881	0.004739336	0.006562158	0.013853445	0.023696682	0.030987969	0.073277433	0.003281079	0.011301495	0.030987969	0.003645643	0.000729129	0.056507474	0.011301495	0	0.001458257	0.002187386	0.005103901	0.012395188	0.004739336	0.001093693	0.005468465	0.095880423	0.006197594	0.001093693	0.034269048	0.000729129	0.009114109	0.000729129	0.015676267	0.004010208	0.005468465	0.123587313	0.001822822	0.000729129	0.000729129	0	0.000729129	0	0.000364564	0.001093693	0.000364564	0.005468465	0.003645643
-5.916153517	0.097351734	0.023498695	0.052965311	0.023498695	0.005594927	0.039537486	0.014173816	0.014546811	0.01230884	0.016411787	0.021260724	0.067885117	0.007832898	0.016784782	0.027228646	0.00074599	0.001491981	0.035061544	0.015292801	0.004475942	0.014919806	0.002983961	0.005967922	0.01305483	0.01230884	0.001118985	0.005221932	0.053338307	0.008951884	0.001491981	0.016038791	0.001118985	0.020514733	0.030585602	0.019395748	0.004102947	0.004848937	0.047370384	0.01156285	0.006713913	0.001118985	0.001864976	0.001491981	0.004102947	0.00074599	0	0.001864976	0.007459903	0.004102947
-5.224317298	0.072172103	0.00832755	0.027758501	0.006245663	0.0111034	0.004163775	0.095766829	0.003469813	0.006939625	0.006245663	0.074947953	0.004163775	0.0055517	0.040249827	0.102706454	0.001387925	0.000693963	0.302567661	0.016655101	0.006245663	0	0.003469813	0.000693963	0.0111034	0	0	0.002081888	0.015267176	0	0	0.0111034	0.043025677	0.00832755	0	0.010409438	0.001387925	0.0055517	0.004857738	0	0.00277585	0	0.000693963	0.004857738	0.011797363	0.002081888	0	0	0.004163775	0
-6.611050045	0.054212454	0.010989011	0.032967033	0.007326007	0.00952381	0.006593407	0.043956044	0.003663004	0.007326007	0.004395604	0.082783883	0.021978022	0.008058608	0.000732601	0.088644689	0.004395604	0.000732601	0.153846154	0.066666667	0.007326007	0.005860806	0.008058608	0	0.00952381	0	0	0.001465201	0.165567766	0.000732601	0.000732601	0.013186813	0	0.008058608	0.000732601	0.00952381	0.002197802	0.005860806	0.014652015	0	0	0.005860806	0.003663004	0.005860806	0.006593407	0.004395604	0	0	0.00952381	0
-5.917024973	0.077455647	0.014279533	0.04456945	0.028991778	0.009952402	0.009952402	0.0263955	0.003894418	0.058848983	0.024231934	0.019904803	0.129813933	0.011683254	0.049762008	0.0263955	0.000432713	0.000865426	0.052791	0.009086975	0.006490697	0.001730852	0.002596279	0.004327131	0.01384682	0.003461705	0.001298139	0.007788836	0.040242319	0.013414106	0.006057984	0.014279533	0.000865426	0.000865426	0.008654262	0.024231934	0.008221549	0.003894418	0.042405885	0.008654262	0.005192557	0.009952402	0	0	0	0.000432713	0.012981393	0.004327131	0	0.009519688
-5.859771047	0.075572519	0.006870229	0.021374046	0.00610687	0.009160305	0.004580153	0.110687023	0.003816794	0.008396947	0.00610687	0.070229008	0.003816794	0.003816794	0.029770992	0.102290076	0.002290076	0.000763359	0.320610687	0.019847328	0.006870229	0	0.003816794	0.001526718	0.010687023	0	0	0.002290076	0.021374046	0	0	0.011450382	0.030534351	0.005343511	0	0.010687023	0	0.00610687	0.005343511	0	0.003053435	0	0.000763359	0.004580153	0.011450382	0.003816794	0	0	0.00610687	0
-4.652538433	0.035750766	0.010214505	0.030643514	0.006639428	0.014811032	0.009703779	0.075587334	0.003064351	0.004085802	0.009193054	0.040347293	0.003575077	0.007150153	0.044433095	0.097037794	0.003575077	0.000510725	0.13278856	0.037282942	0.003064351	0.101634321	0.001532176	0.002042901	0.008171604	0.003575077	0.000510725	0.004085802	0.028600613	0	0.00102145	0.01174668	0.051583248	0.002042901	0	0.010214505	0	0.003064351	0	0	0.00102145	0.004085802	0.000510725	0.006639428	0.009193054	0.00102145	0	0	0	0
-6.965784285	0.071537291	0.006849315	0.01674277	0.01978691	0.003805175	0.00456621	0.101978691	0.00152207	0.00608828	0.005327245	0.072298326	0.009893455	0.005327245	0.011415525	0.090563166	0.00152207	0	0.251141553	0.101978691	0.01369863	0	0.003805175	0	0.00913242	0	0	0	0.055555556	0	0	0.00761035	0	0.012937595	0	0.01065449	0.00456621	0.005327245	0.0152207	0	0	0.002283105	0	0.00608828	0.01217656	0.00456621	0.005327245	0.000761035	0.00608828	0
-3.435963338	0.081431767	0.017449664	0.027293065	0.006263982	0.020134228	0.012527964	0.103355705	0.002237136	0.010290828	0.007606264	0.053691275	0.001342282	0.0049217	0.026845638	0.072483221	0.003131991	0.000447427	0.120805369	0.051454139	0.005369128	0.018344519	0.0049217	0.004474273	0.008053691	0.001789709	0.000894855	0.006263982	0.021029083	0	0.000894855	0.010290828	0.039373602	0.010738255	0	0.023713647	0	0.001789709	0.025055928	0	0.001342282	0.002237136	0.002237136	0.003579418	0.006711409	0.001342282	0	0	0.0098434	0
-1.630795975	0.017948718	0.011794872	0.022051282	0.044615385	0.008717949	0.006153846	0.024102564	0.000512821	0.011794872	0.004102564	0.106666667	0.001538462	0.022564103	0.016923077	0.231282051	0.004102564	0.000512821	0.056923077	0.002564103	0.004615385	0.027179487	0.044102564	0	0.003076923	0.001025641	0	0.001025641	0	0.000512821	0	0.001025641	0	0	0.001538462	0	0.001025641	0.008205128	0	0.016923077	0.011794872	0.007179487	0.001025641	0	0.002564103	0	0	0.002051282	0	0.001025641
-7.551648752	0.057673975	0.010486177	0.060533842	0.005719733	0.002383222	0.010009533	0.009056244	0.001429933	0.001429933	0.005243089	0.064823642	0.013822688	0.003336511	0.000953289	0.097712107	0.001906578	0.000476644	0.177311725	0.066253575	0.002859867	0	0.003813155	0.0042898	0.014299333	0	0.000953289	0.002383222	0.097712107	0.000476644	0.000953289	0.02907531	0.035748332	0.0085796	0	0.027168732	0.001429933	0.0042898	0.010009533	0	0	0.0042898	0	0.003336511	0.007626311	0.001906578	0.003813155	0	0.006673022	0
-6.355792989	0.117255717	0.010810811	0.067775468	0.012474012	0.003326403	0.012889813	0.03035343	0.002079002	0.007484407	0.005821206	0.045322245	0.061122661	0.002910603	0.014137214	0.051559252	0.000831601	0.0004158	0.103534304	0.03950104	0.004158004	0.006652807	0.003742204	0.003742204	0.012058212	0.001663202	0.000831601	0.002910603	0.094386694	0.002494802	0.001247401	0.01995842	0.002494802	0.015384615	0.001663202	0.025363825	0.005821206	0.003742204	0.025363825	0.003742204	0.001663202	0.004573805	0.002079002	0.002494802	0.007068607	0.002079002	0	0.002079002	0.006652807	0.002910603
-4.952322025	0.085205993	0.027153558	0.014981273	0.042134831	0.014981273	0.031835206	0.028089888	0.004681648	0.032771536	0.018726592	0.039325843	0.001872659	0.059925094	0.203183521	0.037453184	0.001872659	0.002808989	0.049625468	0.012172285	0.013108614	0	0.011235955	0.005617978	0.014044944	0.011235955	0.001872659	0.006554307	0	0.003745318	0.008426966	0	0	0.003745318	0.015917603	0.00093633	0.008426966	0.002808989	0	0.019662921	0.011235955	0	0.002808989	0	0	0	0.016853933	0.00093633	0	0.00093633
-7.598413219	0.083443709	0.021854305	0.013907285	0.047019868	0.02384106	0.009933775	0.052980132	0.004635762	0.029801325	0.005298013	0.046357616	0.006622517	0.00794702	0.185430464	0.08013245	0.001986755	0.001324503	0.164900662	0.023178808	0.007284768	0.000662252	0.010596026	0	0	0.002649007	0.001986755	0.005960265	0.00397351	0.005960265	0.001986755	0.003311258	0.003311258	0.006622517	0.003311258	0.003311258	0.005960265	0	0	0.011258278	0	0	0	0	0.005298013	0	0.026490066	0.001324503	0	0.005298013
-0.513604831	0.038001407	0.022519353	0.03026038	0.009852217	0.020408163	0.012667136	0.004222379	0.004926108	0.004926108	0.013370866	0.125263899	0.002814919	0.067558058	0.040112597	0.015482055	0.009148487	0.00070373	0	0.004222379	0.005629838	0.009148487	0.008444757	0.002111189	0.032371569	0.00140746	0.00070373	0.002814919	0	0.002111189	0.003518649	0.008444757	0.00140746	0	0.007037298	0	0	0.026038001	0	0.002111189	0.132301196	0.003518649	0.002814919	0	0	0	0	0	0	0
-5.308715983	0.081954295	0.025216706	0.009456265	0.079590229	0.02285264	0.020488574	0.055161545	0.005516154	0.017336485	0.016548463	0.04570528	0.002364066	0.050433412	0.136327817	0.051221434	0.002364066	0.000788022	0.07643814	0.022064618	0.016548463	0	0.011820331	0.003152088	0.00394011	0.003152088	0.000788022	0.00394011	0	0.003152088	0.00394011	0.003152088	0.019700552	0.002364066	0.011820331	0	0.008668243	0.000788022	0.003152088	0.018124507	0.006304177	0.005516154	0.00394011	0	0.00394011	0	0.02679275	0.00394011	0	0.000788022
-5.051219761	0.043176972	0.006396588	0.012260128	0.005863539	0.003731343	0.004797441	0.069829424	0.001066098	0.003198294	0.004797441	0.07782516	0.013326226	0.003731343	0.001599147	0.09434968	0.002665245	0	0.190831557	0.107142857	0.005863539	0	0.00533049	0	0.012260128	0.001599147	0	0.001599147	0.090085288	0	0.000533049	0.008528785	0.001066098	0.004264392	0	0.013859275	0.008528785	0.00533049	0.013859275	0	0	0.02238806	0.001599147	0.004797441	0.01119403	0.002665245	0.004797441	0	0.014392324	0.000533049
-6.142034924	0.069396552	0.013793103	0.030172414	0.008189655	0.004310345	0.009051724	0.034482759	0.001724138	0.002155172	0.007758621	0.067241379	0.022844828	0.003448276	0.002155172	0.101293103	0.002586207	0.000431034	0.076293103	0.042241379	0.005603448	0.009051724	0.002155172	0.002155172	0.014224138	0.000862069	0.000431034	0.002586207	0.156034483	0.000431034	0.000431034	0.009913793	0.004741379	0.008189655	0	0.009051724	0.000431034	0.000862069	0.006896552	0	0	0.001724138	0	0.003448276	0	0.001724138	0.002586207	0	0.000862069	0
-5.228638365	0.036450079	0.008452192	0.023771791	0.006867406	0.004226096	0.008452192	0.086106709	0.003169572	0.003169572	0.003697834	0.082937137	0.009508716	0.002113048	0.001584786	0.12836767	0.00528262	0.000528262	0.217643951	0.099313259	0.004754358	0.002113048	0.003169572	0.001584786	0.006867406	0.002113048	0	0.003169572	0.104067618	0.000528262	0	0.014263074	0.002113048	0.003697834	0	0.006867406	0.003169572	0	0.008980454	0	0	0.003697834	0	0.006867406	0.007395668	0.001584786	0.00528262	0	0.006339144	0
-4.325973307	0.033453888	0.02124774	0.047468354	0.006329114	0.024412297	0.02079566	0.012206148	0.003616637	0.003164557	0.018083183	0.028028933	0.003616637	0.012658228	0.007685353	0.037522604	0.004972875	0.000904159	0.028481013	0.069168174	0.001808318	0.153254973	0.004068716	0.004972875	0.015370705	0.005424955	0.000904159	0.007233273	0.018987342	0	0.004068716	0.001808318	0.035262206	0.00045208	0.003164557	0.00045208	0.00045208	0	0.001808318	0	0.00045208	0	0.005424955	0.004972875	0.001808318	0.001356239	0	0	0.003164557	0
-4.555036156	0.032495667	0.019930676	0.035095321	0.005199307	0.023830156	0.015164645	0.008232236	0.004332756	0.003032929	0.013431542	0.026863085	0.003466205	0.00779896	0.02339688	0.031629116	0.004332756	0.000866551	0.045060659	0.074956672	0.003032929	0.140381282	0.003466205	0.00389948	0.009965338	0.001733102	0.000866551	0.006065858	0.018630849	0	0.002166378	0.001733102	0.040294627	0	0	0.000433276	0	0.003466205	0.002599653	0	0	0.000433276	0.005199307	0.003466205	0.000866551	0.000866551	0	0	0.006499133	0
0.500057573	0.031019202	0.019202363	0.035942885	0.011816839	0.01427868	0.014771049	0.001969473	0.003938946	0.007877893	0.014771049	0.035942885	0.007385524	0.073855244	0.031019202	0.019202363	0.006400788	0.000492368	0.016248154	0.00295421	0.003446578	0.003938946	0.007877893	0.003446578	0.07779419	0.00295421	0.000984737	0.004923683	0	0.000492368	0.002461841	0.008370261	0	0	0.011816839	0	0	0.0201871	0	0	0.113737075	0.002461841	0.004923683	0.000984737	0	0	0	0	0	0
-0.697710198	0.062464183	0.02234957	0.035530086	0.031518625	0.010888252	0.014899713	0.021203438	0.002292264	0.011461318	0.017191977	0.066475645	0.010888252	0.03495702	0.00286533	0.103724928	0.005730659	0.000573066	0.048137536	0.020630372	0.001719198	0.035530086	0.024641834	0.001719198	0.007449857	0.001146132	0.000573066	0.005157593	0.026361032	0.01260745	0.000573066	0.000573066	0	0.013180516	0.001719198	0.004584527	0.000573066	0.013180516	0.016618911	0.022922636	0.032091691	0.011461318	0.001719198	0	0	0	0	0.000573066	0	0.004011461
-5.737735237	0.036077236	0.008638211	0.056402439	0.006097561	0.005081301	0.008638211	0.108739837	0.00203252	0.003556911	0.00304878	0.090955285	0.005589431	0.00050813	0	0.134146341	0.00050813	0.00304878	0.135162602	0.076727642	0.00304878	0	0	0.00101626	0.00203252	0.00254065	0	0.003556911	0.096036585	0	0	0.035060976	0.06351626	0.00254065	0	0.007113821	0	0	0.005081301	0	0	0.00101626	0	0.008638211	0.007113821	0.00050813	0.005081301	0	0.00254065	0
-4.142544441	0.034810127	0.019439421	0.051084991	0.005877034	0.025768535	0.01039783	0.065551537	0.003616637	0.002260398	0.009493671	0.033453888	0.002260398	0.006329114	0.037974684	0.054249548	0.007233273	0.001808318	0.068716094	0.017179024	0.004972875	0.167721519	0.002712477	0.002712477	0.003616637	0.001808318	0.000904159	0.005877034	0.02079566	0	0.001808318	0.005424955	0.089059675	0.000904159	0.00045208	0.003164557	0	0	0	0	0	0	0.003164557	0.006781193	0.002712477	0.00045208	0	0	0.00045208	0
-0.779818657	0.027227723	0.016831683	0.023267327	0.031683168	0.006930693	0.011881188	0.019306931	0.003465347	0.009405941	0.008910891	0.087623762	0.001980198	0.024257426	0.015346535	0.259405941	0.003960396	0.00049505	0.051980198	0.002475248	0.003960396	0.022772277	0.035148515	0.001980198	0.005445545	0.003465347	0.00049505	0.001980198	0	0.00049505	0.001980198	0	0	0	0.004950495	0	0	0.003960396	0	0.014851485	0.00990099	0.006930693	0.001980198	0	0	0	0.001485149	0.001980198	0	0.000990099
-4.747778134	0.114345114	0.017463617	0.046153846	0.01954262	0.006237006	0.02952183	0.014553015	0.005821206	0.004158004	0.013305613	0.018711019	0.069438669	0.005821206	0.001247401	0.027442827	0.0004158	0.000831601	0.038253638	0.031600832	0.003742204	0.013305613	0.002079002	0.007068607	0.008731809	0.011226611	0.001247401	0.007900208	0.095218295	0.004158004	0.001247401	0.015384615	0.000831601	0.033264033	0.019126819	0.022869023	0.004989605	0.002910603	0.038253638	0.008316008	0.005821206	0	0	0.002079002	0.003742204	0.000831601	0.003326403	0.002079002	0.010810811	0.004989605
-4.067092212	0.093383138	0.017609392	0.04375667	0.035218783	0.004268943	0.017075774	0.020811099	0.003201708	0.011205977	0.019210245	0.032017076	0.054429029	0.025080043	0.01280683	0.040021345	0.001067236	0.000533618	0.048559232	0.028815368	0.006937033	0.00266809	0.005869797	0.004268943	0.007470651	0.002134472	0.001067236	0.006403415	0.082177161	0.011739594	0.001067236	0.020811099	0	0.016008538	0.014407684	0.033084312	0.005869797	0.006937033	0.013874066	0.021878335	0.011205977	0.00266809	0.002134472	0.001600854	0.003735326	0.001067236	0.005869797	0.001600854	0.004802561	0.005869797
-4.647829066	0.051256281	0.006030151	0.048743719	0.006030151	0.002512563	0.006030151	0.066834171	0.001507538	0.001507538	0.005025126	0.065326633	0.027638191	0.001005025	0	0.084422111	0.001507538	0.000502513	0.134673367	0.073869347	0.004522613	0	0.004522613	0.003015075	0.009045226	0.001507538	0	0.00201005	0.106532663	0.000502513	0	0.023115578	0.005025126	0.015075377	0	0.026633166	0.005025126	0.002512563	0.005025126	0	0	0.007537688	0	0.004020101	0.009045226	0.00201005	0.004020101	0	0.006532663	0
-4.23731952	0.083661417	0.027559055	0.010826772	0.043307087	0.01476378	0.018700787	0.042322835	0.001968504	0.018700787	0.008858268	0.042322835	0.000984252	0.042322835	0.174212598	0.054133858	0.001968504	0.000984252	0.06988189	0.025590551	0.010826772	0.001968504	0.015748031	0.003937008	0.002952756	0.003937008	0.000984252	0.000984252	0	0.00492126	0.003937008	0	0.006889764	0	0.010826772	0.001968504	0.00984252	0	0	0.010826772	0.00984252	0.007874016	0	0	0	0	0.057086614	0.003937008	0	0
-0.30315151	0.058935361	0.02851711	0.053231939	0.019961977	0.021863118	0.025665399	0.009505703	0.006653992	0.005703422	0.018060837	0.11121673	0.001901141	0.078897338	0.035171103	0.009505703	0.012357414	0.00095057	0	0.006653992	0.00095057	0.002851711	0.009505703	0.001901141	0.029467681	0.004752852	0.00095057	0.004752852	0	0.00095057	0.003802281	0.011406844	0	0	0.011406844	0	0	0.030418251	0	0.001901141	0.095057034	0.006653992	0	0.001901141	0	0	0	0	0	0
-5.871548215	0.05046729	0.013707165	0.014953271	0.007476636	0.009968847	0.015576324	0.014953271	0.004361371	0.001869159	0.013084112	0.064797508	0.025545171	0.018691589	0.003738318	0.039875389	0.001869159	0	0.061682243	0.090342679	0.004361371	0	0.004361371	0.000623053	0.02741433	0.001869159	0.000623053	0.003115265	0.203738318	0.000623053	0.001869159	0.011214953	0.002492212	0.004984424	0	0.023676012	0.000623053	0.005607477	0.004361371	0	0	0.001869159	0.001869159	0.005607477	0.003115265	0.004361371	0.003738318	0	0.011214953	0
-1.008856422	0.058870968	0.017741935	0.012096774	0.077419355	0.015322581	0.014516129	0.053225806	0.004032258	0.048387097	0.008064516	0.05483871	0.001612903	0.081451613	0.087096774	0.045967742	0.001612903	0.001612903	0.054032258	0.001612903	0.02016129	0.00483871	0.02016129	0.001612903	0.002419355	0	0.001612903	0.002419355	0	0.006451613	0.00483871	0	0.003225806	0	0.00483871	0.004032258	0.012903226	0	0	0.047580645	0.00483871	0.003225806	0.004032258	0	0	0	0.027419355	0.005645161	0	0.001612903
-2.689194569	0.025694809	0.015731515	0.020975354	0.007341374	0.016255899	0.009438909	0.031463031	0.002621919	0.002097535	0.008390142	0.042475092	0.004719455	0.017829051	0.008390142	0.175144206	0.005768222	0.000524384	0.055584688	0.030938647	0.004719455	0.08862087	0.002621919	0.003670687	0.002097535	0.001573152	0.001048768	0.003146303	0.033036182	0	0	0.002621919	0.012060829	0	0	0.003146303	0	0	0	0.000524384	0	0	0.002621919	0.003146303	0.001048768	0.000524384	0	0	0	0
-3.079478021	0.024632875	0.014684983	0.019895784	0.007105637	0.015158693	0.01089531	0.067740407	0.002842255	0.002368546	0.008526765	0.031264803	0.004263382	0.012316438	0.007579346	0.181430602	0.00568451	0.000473709	0.03315964	0.047370914	0.004737091	0.080530554	0.001894837	0.002842255	0.002368546	0.000947418	0.001421127	0.004263382	0.042160114	0	0.000473709	0	0.012316438	0.000473709	0	0.000473709	0	0.000947418	0	0.000947418	0	0	0.004263382	0.003315964	0	0.001421127	0	0	0	0
1.327290712	0.029120879	0.023076923	0.03021978	0.01043956	0.018681319	0.023076923	0.002197802	0.003846154	0.006593407	0.018681319	0.031318681	0.006593407	0.076923077	0.014285714	0.013186813	0.007692308	0.000549451	0.01043956	0.002197802	0.003846154	0.004395604	0.005494505	0.003846154	0.074725275	0.003846154	0.001098901	0.008241758	0	0.001098901	0.005494505	0.007692308	0	0	0.015384615	0	0	0.020879121	0.002197802	0.000549451	0.123626374	0	0.005494505	0	0	0	0	0	0	0
-4.338469283	0.052311436	0.005474453	0.007907543	0.049270073	0.003041363	0.004257908	0.161192214	0.001216545	0.006082725	0.003649635	0.090632603	0.00973236	0.003649635	0.001216545	0.147810219	0.001216545	0.000608273	0.223844282	0.079683698	0.01459854	0	0.00243309	0	0.001216545	0.001216545	0.000608273	0.001216545	0.008515815	0.000608273	0	0.008515815	0.003649635	0.003041363	0	0.017639903	0.01216545	0.004257908	0.005474453	0.005474453	0	0.00486618	0	0.00243309	0.01459854	0.001216545	0.016423358	0	0.004257908	0.00486618
-3.370937195	0.056079956	0.016657413	0.019988895	0.121599112	0.010549695	0.008883953	0.042754026	0.004441977	0.049972238	0.008328706	0.065519156	0.014436424	0.01332593	0.051082732	0.059966685	0.002776235	0.000555247	0.109938923	0.006107718	0.021099389	0	0.011660189	0.001665741	0.007218212	0.001665741	0.000555247	0.003331483	0.012770683	0.012770683	0.002220988	0.011660189	0.002776235	0.001665741	0.004997224	0.027207107	0.011104942	0.001665741	0.001665741	0.037756802	0.001110494	0.007773459	0	0.001665741	0.00388673	0.000555247	0.025541366	0.004997224	0	0.024986119
-4.145860689	0.048633441	0.008842444	0.01607717	0.025321543	0.00562701	0.004823151	0.219453376	0.002411576	0.001607717	0.003215434	0.125401929	0.009244373	0	0	0.101688103	0.000803859	0.002813505	0.084003215	0.076768489	0.006028939	0.004019293	0.000401929	0.000401929	0.001607717	0.003215434	0	0.006028939	0.078376206	0.000401929	0	0.011254019	0.000803859	0.003215434	0	0.007636656	0.008440514	0.000401929	0.006832797	0.002009646	0	0	0	0.004823151	0.008440514	0.002009646	0.014469453	0	0.003215434	0
-5.401406116	0.060821085	0.031931069	0.042574759	0.032437912	0.04054739	0.032944754	0.025342119	0.017232641	0.040040547	0.016725798	0.052711607	0.125190066	0.004561581	0.002534212	0.026355803	0.003547897	0.011150532	0.05119108	0.002027369	0.005068424	0	0.001520527	0.004054739	0.000506842	0.018246325	0.002027369	0.01064369	0.101368474	0.01064369	0	0.020273695	0	0	0	0.007602636	0.041561075	0	0	0	0	0	0	0	0	0	0.028890015	0.004054739	0.001013685	0.030410542
-4.04073432	0.033408834	0.010758777	0.092298981	0.004530011	0.013023783	0.008493771	0.054360136	0.003397508	0.004530011	0.004530011	0.063420159	0.008493771	0.003397508	0.003397508	0.080973952	0.001698754	0.000566251	0.135334088	0.062287656	0.003397508	0.007361268	0.003397508	0.00396376	0.008493771	0.002265006	0.001132503	0.00396376	0.094563986	0	0	0.016987542	0.052661382	0.009060023	0	0.013023783	0.002265006	0.001698754	0.005096263	0	0	0.003397508	0.001698754	0.00792752	0.005096263	0.001698754	0.002831257	0	0.00792752	0
-4.430975623	0.071369975	0.015586546	0.048400328	0.015586546	0.005742412	0.011484824	0.035274815	0.003281378	0.001640689	0.007383101	0.07219032	0.068088597	0.003281378	0.006562756	0.031173093	0.001640689	0	0.066447908	0.050041017	0.00902379	0.001640689	0.006562756	0.003281378	0.016406891	0	0	0	0.146841674	0.001640689	0	0.013945857	0.002461034	0.016406891	0	0.024610336	0.005742412	0	0.016406891	0	0	0.004101723	0.002461034	0.002461034	0.004922067	0.003281378	0	0	0.015586546	0.000820345
-3.954333373	0.059727972	0.010053223	0.023654642	0.013010053	0.007687759	0.010053223	0.072146659	0.00295683	0.00295683	0.008279125	0.0644589	0.01951508	0.003548196	0	0.076877587	0.003548196	0.000591366	0.12300414	0.087522176	0.005913661	0.002365464	0.005913661	0	0.006505027	0.003548196	0	0.00295683	0.122412774	0.000591366	0	0.010644589	0.001182732	0.011827321	0	0.013601419	0.006505027	0.002365464	0.011827321	0	0	0.003548196	0.000591366	0.005913661	0.004139562	0.001774098	0.009461857	0	0.013601419	0.000591366
[truncated: 80 more columns]
