# Supplementary material for: A methodology for the design of experiments in computational intelligence with multiple regression models
Source: PeerJ. 2016 Dec 1;4:e2721. doi: 10.7717/peerj.2721 (PMC5136129; doi:10.7717/peerj.2721)
Supplement: Data S1 — Datailed results from UC Irvine Machine Learning Repository (Housing, Machine CPU, Wine Quality, Automobile and Parkinson) and the 3 Use Cases (Protein Corona, Gajewicz Metal Oxides and Aquatic Toxicity) [file peerj-04-2721-s001.zip › 0_datasets/ds.toxicity.csv]

net.c	TPSA(Tot)	SAacc	H-050	MLOGP	RDCHI	GATS1p	nN	C-040
3.74	0	0	0	2.419	1.225	0.667	0	0
4.33	0	0	0	2.638	1.401	0.632	0	0
7.019	9.23	11	0	5.799	2.93	0.486	0	0
6.723	9.23	11	0	5.453	2.887	0.495	0	0
5.979	9.23	11	0	4.068	2.758	0.695	0	0
6.064	215.34	327.629	3	0.189	4.677	1.333	0	4
7.337	9.23	11	0	2.723	2.321	1.165	0	0
4.1	0	0	0	3.267	2.318	0.963	0	0
3.941	0	0	0	2.067	1.8	1.25	0	0
3.809	0	0	0	2.746	1.667	1.4	0	0
4.34	0	0	0	3.124	1.8	1.417	0	0
3.93	12.03	18.011	1	0.817	1.8	1.488	1	0
7.371	69.67	97.435	0	3.122	3.723	1.26	0	2
3.78	23.79	31.059	0	0.094	1.334	1.115	1	1
4.112	92.14	107.097	1	4.275	4.174	1.174	1	1
3.533	0	0	0	2.851	1.989	0.938	0	0
4.632	0	0	0	1.115	1	0.588	0	0
7.693	35.53	47.145	0	4.579	3.875	1.124	0	1
0.673	17.07	25.145	0	0.202	1.225	1.66	0	0
3.323	34.14	50.29	0	0.076	1.654	1.493	0	0
2.955	67.51	103.973	1	3.204	3.344	0.938	0	1
4.216	49.33	85.839	2	1.06	2.272	1.007	1	1
2.593	122.22	155.543	2	1.406	3.511	1.456	5	2
2.272	18.46	22	0	1.262	2.147	1.576	0	0
5.96	3.24	3.124	0	9.148	5.497	1.559	1	0
6.537	12.03	18.011	1	6.728	4.392	1.554	1	0
7.1	54.57	41.028	0	5.65	4.026	1.575	0	0
6.424	118.22	238.562	5	2.201	3.83	1.214	0	0
4.355	37.3	67.828	1	3.23	2.63	1.166	0	1
5.721	3.24	3.124	0	4.48	3.258	1.31	1	0
5.102	12.47	14.124	0	3.827	3.362	1.373	1	0
3.718	0	0	0	2.226	1.265	0.57	0	0
3.577	0	14.96	0	2.026	1.265	0.722	0	0
6.458	45.61	28.269	0	3.012	2.557	0.901	1	0
2.352	12.03	18.011	1	1.587	1.654	1.732	1	0
2.958	86.81	121.412	3	0.709	2.938	1.416	2	0
5.44	132.42	196.332	2	4.478	4.984	1.087	4	0
4.838	40.46	85.367	2	5.255	3.001	0.485	0	0
6.858	0	0	0	5.453	2.837	0.735	0	0
6.36	20.23	42.683	1	3.921	2.494	1.229	0	0
4.301	40.46	85.367	2	3.306	2.832	0.917	0	0
3.772	0	0	0	3.259	2.048	1.111	0	0
4.179	26.02	32.897	2	2.193	2.031	0.992	1	0
3.061	17.07	25.145	0	1.947	2.005	1.276	0	0
4.867	0	0	0	3.267	2.119	1.25	0	0
5.373	0	0	0	3.267	2.119	1.25	0	0
3.522	0	0	0	3.374	2.118	1.204	0	0
0.55	17.07	25.145	0	-0.317	1.155	1.74	0	0
4.714	29.1	43.156	1	3.076	2.438	0.773	1	1
3.17	37.3	67.828	1	0.133	1.401	1.582	0	1
1.22	40.46	85.367	2	0.706	1.768	1.594	0	0
3.631	0	0	0	2.226	1.401	0.826	0	0
3.725	103.67	119.505	1	3.546	2.847	1.211	3	0
6	111.87	144.177	1	2.702	2.626	1.047	2	0
6.32	38.33	54.156	1	2.391	2.612	1.293	1	0
2.201	75.27	111.456	2	0.779	2.709	1.029	2	2
2.815	17.07	25.145	0	0.202	1.334	1.66	0	0
3.819	87.66	139.995	3	1.589	3.514	1.339	2	1
3.16	37.3	67.828	1	0.586	1.577	1.56	0	1
4.72	49.17	55.448	0	4.168	3.329	1.042	3	0
4.333	93.06	157.656	2	2.014	3.767	1.189	0	0
3.87	0	0	0	3.138	1.509	1.7	0	0
3.358	37.3	67.828	1	0.996	1.746	1.547	0	1
3.08	37.3	67.828	1	2.06	2.06	1.529	0	1
3.115	20.23	42.683	1	2.274	2.005	1.596	0	0
5.749	52.6	72.29	0	4.737	3.907	1.595	0	2
4.55	52.6	72.29	0	5.426	3.893	1.402	0	2
6.383	54.57	41.028	0	5.208	3.691	1.585	0	0
4.34	0	0	0	3.516	1.678	1.667	0	0
4.85	81.7	115.445	1	5.44	4.623	1.517	1	3
6.064	20.23	42.683	1	5.089	3.049	1.247	0	0
6.36	20.23	42.683	1	4.833	2.913	1.229	0	0
6.074	50.24	26.663	0	3.247	2.789	1.206	1	1
3.226	20.23	42.683	1	1.94	1.997	1.61	0	0
2.626	122.91	210.537	3	0.868	3.59	1.462	3	1
4.474	45.61	28.269	0	2.275	2.445	1.29	1	0
5.429	44.45	16.786	0	2.539	1.84	0.92	1	1
6.848	38.33	54.156	1	1.737	2.472	0.638	1	0
3.85	70.14	50.908	3	0.59	1.909	0.907	2	0
4.878	52.6	72.29	0	3.618	3.197	1.356	0	2
5.19	52.6	72.29	0	4.091	3.568	1.15	0	2
3.7	9.23	11	0	2.274	2.15	1.754	0	0
5.291	46.15	54.999	0	2.11	3.866	1.521	0	0
6.042	54.57	41.028	0	3.742	3.136	1.773	0	0
5.548	0	0	0	3.562	2.281	1.15	0	0
4.608	45.61	28.269	0	1.971	2.294	1.275	1	0
6.188	121.26	6.249	0	2.869	3.095	0.862	2	0
6.24	94.88	149.498	0	4.207	3.047	1.283	3	0
0.935	20.23	42.683	1	0.347	1.334	1.768	0	0
3.25	41.57	57.28	1	0.734	2.548	1.853	2	0
6.102	38.8	0	1	1.364	1.334	1.212	0	0
6.579	86.71	27.185	0	2.06	2.394	1.088	0	0
7.044	92.31	70.941	2	2.195	3.082	0.999	3	0
9.14	98.61	57.46	0	2.054	2.891	1.442	3	0
5.308	44.45	16.786	0	1.676	1.509	0.779	1	1
2.838	56.15	36.022	2	0.59	1.879	1.001	2	0
3.351	56.15	36.022	2	1.945	2.461	0.805	2	0
3.331	62.73	86.378	2	2.273	2.478	1.254	5	0
6.447	86.52	117.437	2	2.031	2.679	1.198	6	1
0.59	20.23	42.683	1	-0.172	1.155	1.911	0	0
5.03	107.65	178.917	0	4.219	3.945	1.078	1	2
2.827	26.3	36.145	0	0.996	1.723	1.805	0	1
2.899	52.6	72.29	0	0.787	2.223	1.8	0	2
8.349	138.26	86.133	0	0.491	2.854	1.146	0	2
3.603	52.6	72.29	0	2.577	2.707	1.313	0	2
2.668	52.33	62.438	0	0.567	2.239	1.542	1	1
1.73	9.23	11	0	0.8	1.509	2.003	0	0
9.141	100.39	91.775	0	2.682	2.903	1.823	1	0
6.442	110.96	13.843	0	3.089	3.015	0.889	0	0
8.564	95.37	54.336	0	2.433	2.915	1.394	2	0
8.15	115.41	71.512	0	2.223	2.903	1.295	1	0
8.849	82.48	37.55	0	3.213	2.806	1.172	1	0
8.207	110.96	13.843	0	1.971	2.52	1.012	0	0
3.072	64.63	90.3	1	1.651	2.785	1.346	1	2
5.036	21.26	29.011	1	2.826	2.709	1.184	1	0
7.483	76.43	6.922	0	2.723	2.553	0.835	0	0
5.562	38.8	0	1	0.845	1.155	1.177	0	0
4.437	45.61	28.269	0	1.579	2.397	1.162	1	0
7.128	110.96	13.843	0	1.321	2.402	0.988	0	0
3.277	193.91	332.83	5	-0.139	4.73	1.551	1	1
3.795	180.08	310.81	5	0.143	4.805	1.597	2	1
4.602	182.91	301.147	4	0.036	4.758	1.584	1	1
4.307	49.41	71.18	1	4.761	3.537	1.147	2	2
6.13	26.02	32.897	2	2.193	2.056	0.992	1	0
3.481	12.89	16.786	0	1.533	2.056	1.203	1	0
4.632	77.82	99.365	4	3.048	2.813	0.791	4	0
3.432	74.57	147.153	2	1.789	3.373	1.175	3	1
1.601	23.55	31.394	0	0.16	1.7	2.092	2	0
7.037	58.56	75.965	0	1.648	2.689	1.675	4	0
2.232	38.57	6.249	0	0.59	1.7	1.19	2	0
3.392	61.35	36.022	2	-0.273	1.475	0.876	2	0
4.858	95.96	6.249	0	0.454	2.072	0.8	2	0
6.059	121.26	6.249	0	0.454	2.227	0.677	2	0
7.378	140.02	119.209	4	-0.812	2.478	0.926	3	0
1.43	36.6	20.263	0	1.354	1.89	2.073	3	0
3.573	181.62	324.873	7	-0.392	3.629	0.863	2	1
6.43	181.62	324.873	7	-0.875	3.595	0.945	2	1
4.385	3.24	3.124	0	2.193	2.048	1.241	1	0
3.298	61.35	36.022	2	1.628	2.231	0.75	2	0
2.685	111.56	99.4	2	0.658	3.426	1.189	4	0
4.733	16.13	19.91	0	1.272	2.473	1.256	2	0
3.674	75.01	128.306	1	1.146	3.505	1.232	3	1
5.47	63.87	6.249	0	0.198	1.975	0.858	2	0
5.76	83.67	84.184	1	0.349	2.397	2.092	1	1
5.13	114.76	56.999	1	-0.755	2.214	1.033	1	1
5.12	96.3	102.044	1	-0.463	2.434	1.256	3	2
5.9	93.21	118.087	1	-0.147	2.355	1.644	2	0
5.551	75.99	73.774	1	0.787	2.266	1.185	2	0
6.52	47.56	65.155	1	1.459	2.72	1.265	1	0
6.883	56.79	76.155	1	1.064	2.72	1.346	1	0
5.942	38.33	54.156	1	2.222	2.725	1.012	1	0
3.979	70.14	50.908	3	-0.792	1.401	0.647	2	0
2.188	47.36	21.135	1	0.18	1.627	1.051	2	0
3.008	73.58	63.842	2	0.894	3.136	1.388	3	0
5.79	12.03	18.011	1	1.859	1.989	1.062	1	0
0.989	20.23	42.683	1	-0.814	1	2.353	0	0
5.742	69.48	142.262	0	4.096	3.884	1.169	2	1
6.756	65.82	80.765	0	3.692	3.883	1.087	3	0
4.33	164.9	144.333	4	0.16	3.323	0.833	4	0
4.652	76.66	108.311	2	2.087	3.468	1.137	2	0
3.77	52.6	72.29	0	2.005	2.468	1.281	0	2
5.475	35.53	47.145	0	3.967	3.368	1.533	0	1
3.536	55.84	75.414	0	1.907	2.892	1.439	1	2
4.339	29.54	39.269	0	3.026	2.828	1.243	1	1
0.59	29.46	53.683	1	-0.081	1.577	1.952	0	0
2.511	35.53	47.145	0	0.538	1.952	1.928	0	1
1.888	38.69	64.683	1	0.224	2.108	1.904	0	0
7.699	65.57	76.79	1	0.489	1.999	1.533	0	0
4.107	90.51	65.67	1	-0.759	1.929	1.402	1	1
6.618	87.43	55.411	2	-1.222	1.575	1.362	1	0
7.671	115.41	71.512	0	1.919	2.72	1.291	1	0
7.341	115.41	71.512	0	1.602	2.687	1.288	1	0
7.858	133.44	75.193	0	0.906	3.034	0.941	3	1
7.012	9.23	11	0	4.19	2.225	0.58	0	0
6.176	29.46	53.683	1	3.028	2.225	0.548	0	0
5.527	29.46	53.683	1	2.736	2.183	0.62	0	0
5.636	100.87	112.494	0	3.275	2.661	1.243	2	0
5.372	29.46	53.683	1	2.736	2.187	0.62	0	0
5.571	35.25	43.897	2	1.246	2.056	1.081	1	0
3.155	41.57	57.28	1	1.838	2.611	1.175	2	0
3.594	96.31	77.727	1	1.126	3.536	1.157	3	0
5.642	35.25	43.897	2	1.246	2.046	1.081	1	0
3.48	29.46	53.683	1	1.246	2.046	1.114	0	0
3.432	9.23	11	0	1.859	1.989	1.164	0	0
4.011	35.25	43.897	2	1.246	2.031	1.081	1	0
3.68	29.46	53.683	1	1.246	2.031	1.114	0	0
5.132	75.74	93.694	3	2.195	4.365	1.086	2	0
6.79	94.89	20.765	0	2.492	2.659	1.194	0	0
4.485	88.03	86.378	2	3.185	2.93	1.13	5	0
4.288	102.02	101.265	3	2.273	2.459	1.086	5	0
5.45	0	0	0	3.562	2.031	1.15	0	0
4.53	0	0	0	3.259	1.975	1.111	0	0
4.765	20.23	42.683	1	2.193	1.975	1.02	0	0
3.524	0	0	0	2.942	1.924	1.063	0	0
4.14	103.35	161.259	2	2.401	3.053	0.798	1	0
4.317	0	0	0	3.562	2.119	1.15	0	0
4.933	0	0	0	3.21	1.924	0.788	0	0
3.71	20.23	42.683	1	1.859	1.924	0.949	0	0
3.618	12.89	16.786	0	2.66	2.408	0.976	1	0
4.98	0	0	0	3.677	2.344	0.868	0	0
4.025	28.24	0	0	3.169	2.238	0.711	0	0
3.653	0	0	0	2.942	1.918	1.063	0	0
5.168	26.02	32.897	2	1.859	1.918	0.917	1	0
3.76	20.23	42.683	1	1.859	1.918	0.949	0	0
4.04	45.82	50.747	0	2.241	2.108	0.942	1	0
5.001	0	0	0	3.677	2.324	0.868	0	0
3.791	0	0	0	2.942	1.908	1.063	0	0
3.863	20.23	42.683	1	1.859	1.908	0.949	0	0
2.359	84.32	125.108	2	0.139	2.748	1.267	2	1
4.756	28.24	0	0	3.169	2.224	0.711	0	0
4.002	0	0	0	2.459	1.475	1.5	0	0
3.28	0	0	0	1.672	1.225	0.562	0	0
8.067	35.53	47.145	0	4.579	3.875	0.927	0	1
2.576	17.07	25.145	0	1.442	1.509	1.157	0	1
4.927	0	0	0	3.291	1.549	2	0	0
4.186	0	0	0	2.957	1.509	0.533	0	0
3.46	0	0	0	2.604	1.475	0.505	0	0
3.954	0	44.88	0	2.419	1.509	0.731	0	0
8.271	0	0	0	6.166	2.959	0.57	0	0
3.643	0	0	0	2.226	1.265	2.5	0	0
3.254	0	0	0	1.817	1.225	0.502	0	0
6.72	0	0	0	3.558	1.978	1	0	0
6.508	12.53	11	0	4.452	2.862	0.543	0	0
5.3	60.98	61.404	0	3.429	2.749	1.08	0	0
6.21	12.53	11	0	4.214	2.687	0.504	0	0
6.777	0	0	0	5.124	2.515	0.456	0	0
6.623	0	0	0	5.469	2.573	0.465	0	0
3.485	0	0	0	2.081	1.401	0.501	0	0
2.642	0	0	0	1.672	1.334	0.562	0	0
3.655	0	0	0	2.604	1.559	0.664	0	0
3.842	0	0	0	2.604	1.43	0.505	0	0
3.339	0	0	0	2.226	1.401	0.826	0	0
3.587	12.53	11	0	0.408	1.689	1.038	0	0
4.322	0	0	0	2.081	1.509	0.685	0	0
2.49	0	0	0	1.817	1.334	0.718	0	0
2.937	18.46	22	0	1.466	2.15	1.22	0	0
3.044	67.34	94.527	2	-0.297	1.604	1.682	0	0
5.6	0	0	0	4.634	2.018	0.461	0	0
4.75	0	0	0	4.063	1.96	0.499	0	0
5.56	20.23	42.683	1	3.909	2.12	0.281	0	0
7.61	0	0	0	6.232	2.728	0.493	0	0
8.78	0	0	0	6.47	2.805	0.469	0	0
5.632	20.23	42.683	1	3.046	2.027	0.602	0	0
4.874	0	0	0	4.634	2.027	0.461	0	0
4.495	20.23	42.683	1	3.314	2.027	0.409	0	0
4.674	0	0	0	4.926	2.074	0.478	0	0
4.761	26.02	32.897	2	3.314	2.031	0.366	1	0
4.864	20.23	42.683	1	3.314	2.031	0.409	0	0
8.44	0	0	0	6.47	2.821	0.469	0	0
5.64	0	0	0	5.472	2.676	0.577	0	0
5.878	55.05	61.747	0	4.296	3.055	0.603	1	0
4.434	45.82	50.747	0	3.11	2.165	0.478	1	0
4.257	92.35	174.455	1	3.84	3.373	0.802	1	1
5.691	20.23	42.683	1	2.461	1.975	0.737	0	0
5.42	0	0	0	3.795	1.975	0.657	0	0
4.713	39.94	104.289	0	4.281	3.357	1.002	3	0
4.83	0	0	0	4.063	1.975	0.499	0	0
5.43	26.02	32.897	2	2.729	1.975	0.462	1	0
4.797	20.23	42.683	1	2.729	1.975	0.5	0	0
4.66	45.82	50.747	0	3.11	2.16	0.478	1	0
6.989	0	0	0	5.989	2.733	0.529	0	0
4.742	26.02	32.897	2	2.729	1.975	0.462	1	0
6.109	29.46	53.683	1	3.842	2.887	0.614	0	0
4.268	45.82	50.747	0	2.842	2.154	0.726	1	0
6.65	75.13	100.774	3	4.512	3.662	0.702	5	0
4.138	0	0	0	3.478	1.924	0.575	0	0
4.992	41.57	57.28	1	3.18	3.292	1.014	2	0
4.711	42.52	44.313	0	4.746	2.905	0.916	0	0
4.31	45.82	50.747	0	2.509	2.119	0.617	1	0
6.209	0	0	0	5.472	2.703	0.577	0	0
5.626	0	0	0	4.416	2.605	0.723	0	0
8.16	0	0	0	5.989	2.758	0.529	0	0
6.99	0	0	0	5.989	2.712	0.529	0	0
6.212	30.18	48.531	0	4.27	3.354	0.867	3	0
5.5	0	0	0	3.945	2.344	0.678	0	0
4.304	0	0	0	3.478	1.918	0.575	0	0
3.84	45.82	50.747	0	2.509	2.108	0.617	1	0
5.641	0	0	0	4.416	2.591	0.723	0	0
5.009	0	0	0	3.945	2.324	0.678	0	0
3.918	0	0	0	2.876	1.857	0.699	0	0
4.787	0	0	0	3.478	1.908	0.575	0	0
2.572	72.68	73.324	1	0.403	2.355	1.424	4	1
4.9	22	73.15	0	3.983	3.431	0.951	1	0
3.028	61.82	73.324	0	0.736	2.405	1.546	4	1
2.018	0	59.84	0	1.817	1.43	1.988	0	0
3.716	65.72	101.271	2	-0.234	1.975	1.091	2	1
3.742	74.57	132.193	2	1.671	3.501	1.095	3	1
4.579	43.24	59.409	0	4.396	3.542	0.91	3	0
5.754	39.72	65.971	1	3.289	3.767	1.129	1	0
4.835	64.16	92.47	0	3.613	4.245	1.175	4	2
8.582	59.32	78.204	0	4.832	4.074	0.962	1	2
8.678	59.32	123.084	0	4.217	4.111	0.994	1	2
9.945	59.32	78.204	0	4.794	3.99	0.645	1	2
9.063	59.32	78.204	0	3.907	3.934	0.908	1	2
2.533	114.19	100.652	3	0.821	3.06	1.082	6	1
6.475	75.39	67.204	0	2.981	2.784	1.072	1	2
6.251	98.18	62.119	0	0.796	1.84	0.743	2	2
9.133	59.32	93.164	0	4.279	3.962	0.907	1	2
10.047	59.32	78.204	0	4.115	3.934	0.76	1	2
4.92	36.26	60.144	0	3.3	3.469	1.102	2	1
3.34	49.57	64.63	0	-0.259	1.989	1.103	3	1
2.928	237.75	223.047	8	0.083	3.249	1.04	7	1
2.649	43.09	58.042	2	-0.38	1.401	1.151	1	1
4.27	166.75	250.102	6	1.632	5.369	1.145	6	4
4.234	48.02	61.166	2	2.589	2.919	0.826	2	0
2.348	43.09	58.042	2	2.481	2.133	0.506	1	1
3.884	84.13	65.794	4	-1.434	1.225	0.335	2	0
3.476	70.14	50.908	3	1.294	2.203	0.591	2	0
3.133	26.02	32.897	2	0.202	1.334	1.347	1	0
3.358	52.04	65.794	4	-1.053	1.334	1.61	2	0
3.775	68.01	92.593	3	-0.283	2.17	0.893	3	1
5.16	26.02	32.897	2	2.729	1.979	0.462	1	0
5.43	26.02	32.897	2	3.314	2.018	0.366	1	0
6.409	26.02	32.897	2	2.127	1.924	0.597	1	0
4.263	52.04	65.794	4	0.893	1.918	0.732	2	0
5.371	26.02	32.897	2	1.506	1.857	0.815	1	0
2.072	90.37	131.635	3	0.332	2.706	1.313	3	1
4.404	129.62	165.834	6	2.703	3.078	0.775	7	0
2.332	12.53	11	0	-0.564	1.5	1.733	0	0
4.018	12.53	11	0	1.533	2.274	1.026	0	0
5.301	74.92	138.783	1	3.16	2.827	1.14	2	1
8.112	26.3	81.025	0	5.4	3.936	0.991	0	1
7.802	58.2	116.232	2	3.508	3.281	0.803	2	1
7.478	41.13	61.166	2	3.988	3.169	0.627	2	0
6.394	17.07	25.145	0	4.912	2.659	0.491	0	0
5.001	34.14	50.29	0	1.415	2.074	1.108	0	0
5.545	34.14	50.29	0	2.233	2.415	0.866	0	0
4.249	58.2	86.311	2	3.652	3.557	1.237	2	2
5.17	37.3	67.828	1	3.696	3.117	1.149	0	0
3.769	73.22	61.166	2	-1.202	1.795	0.599	2	1
3.508	120.73	148.22	1	0.096	2.964	1.16	4	1
1.188	41.13	61.166	2	-1.095	1.726	1.463	2	0
3.884	182.83	315.561	5	1.662	5.831	1.351	0	1
4.566	203.06	358.244	6	0.957	5.839	1.345	0	1
3.788	34.14	50.29	0	0.076	1.84	1.493	0	0
0.704	20.31	28.269	0	-0.273	1.401	2.073	1	1
3.669	77.76	153.195	3	0.559	2.137	0.767	0	0
3.976	17.07	25.145	0	1.769	1.989	0.927	0	0
4.024	66.05	93.43	1	1.348	2.09	0.784	1	0
4.403	32.67	47.536	0	3.223	2.773	0.881	2	0
5.512	54.57	41.028	0	4.789	3.58	1.505	0	0
4.225	87.08	111.608	1	1.749	3.666	1.085	3	0
4.072	42.52	44.313	0	1.473	2.241	1.158	0	0
4.57	42.52	44.313	0	2.777	2.643	1.055	0	0
6.075	54.74	39.247	0	3.115	2.706	0.946	0	0
4.221	80.74	61.166	2	-0.31	1.918	0.578	2	1
4.032	30.21	36.145	0	2.265	2.344	0.923	0	1
3.22	60.13	76.448	0	2.288	2.848	1.591	4	0
4.001	38.77	22.156	0	2.779	2.639	0.859	0	0
4.501	118.65	210.6	1	3.773	3.759	0.95	1	2
3.599	54.37	92.973	1	3.374	3.061	0.91	0	1
4.56	37.3	67.828	1	4.548	3.101	1.137	0	1
2.736	115.14	206.609	3	-1.169	2.333	1.496	1	3
3.047	46.53	78.828	1	2.086	2.455	0.941	0	1
3.783	46.53	78.828	1	2.354	2.455	0.743	0	1
4.187	104.06	189.34	3	1.929	3.197	1.021	0	2
3.068	57.53	110.512	2	1.643	2.09	0.814	0	1
3.644	76.21	117.511	3	1.119	2.25	0.375	2	1
4.01	50.94	76.132	1	3.77	3.091	1.081	3	0
3.917	67.79	107.839	2	2.347	3.243	1.4	1	1
3.902	84.58	129.736	4	0.925	3.178	1.263	2	1
3.277	81.95	157.061	4	1.358	3.325	1.248	1	0
4.305	57.28	71.694	3	2.124	3.455	1.069	2	0
3.961	94.83	178.34	3	1.661	3.391	0.942	0	0
1.82	20.23	42.683	1	0.8	1.401	1.698	0	0
3.002	20.23	42.683	1	1.209	1.43	0.476	0	0
2.957	52.49	103.377	3	-0.917	1.84	1.75	1	0
0.122	40.46	85.367	2	-1.053	1.334	1.827	0	0
1.07	29.46	53.683	1	-0.081	1.678	1.952	0	0
1.53	38.69	64.683	1	-0.129	2.15	1.971	0	0
3.077	336.43	551.098	16	-5.199	4.3	1.373	7	0
3.025	115.38	179.269	3	1.228	3.039	0.787	2	1
3.088	347.32	571.952	18	-6.446	4.624	1.39	5	0
3.177	97.99	195.878	4	-1.204	2.214	1.066	0	1
5.291	138.45	281.245	6	1.442	3.878	1.205	0	0
4.852	20.23	42.683	1	2.461	1.975	0.737	0	0
4.464	20.23	42.683	1	2.296	1.924	0.521	0	0
4.426	20.23	42.683	1	2.127	1.924	0.633	0	0
4.016	66.05	93.43	1	1.348	2.119	0.784	1	0
4.668	20.23	42.683	1	3.127	2.605	0.797	0	0
4.962	40.46	85.367	2	3.635	3.12	1.03	0	0
4.61	20.23	42.683	1	2.637	2.344	0.758	0	0
3.85	20.23	42.683	1	1.506	1.857	0.853	0	0
4.238	20.23	42.683	1	2.127	1.908	0.633	0	0
5.38	20.23	42.683	1	3.127	2.57	0.797	0	0
3.589	56.15	36.022	2	-0.665	1.726	0.676	2	0
4.932	61.52	41.93	0	3.447	2.307	0.662	1	2
6.099	44.45	16.786	0	3.648	2.427	0.757	1	1
6.54	44.45	16.786	0	3.33	2.281	0.701	1	1
6.399	88.9	33.571	0	4.405	2.456	0.568	2	2
6.131	44.45	16.786	0	3.265	2.134	0.637	1	1
4.56	64.18	0	0	-0.049	1.155	1.5	0	1
2.54	50.93	0	0	0.552	2.485	1.147	3	0
4.494	79.93	16.786	1	1.769	2.239	0.793	1	0
3.758	118.06	85.367	4	-0.081	1.768	1.061	0	0
4.168	86.34	105.331	1	1.616	2.97	0.983	5	0
3.85	165.15	185.897	0	0.575	2.608	1.809	3	0
3.339	119.33	134.931	0	0.289	2.587	1.989	2	0
5.441	91.64	101.494	0	2.239	2.296	0.884	2	0
3.138	134.73	159.536	2	1.649	2.527	0.818	3	1
4.79	111.87	144.177	1	1.748	2.377	0.839	2	0
4.39	137.46	152.241	0	2.359	2.527	0.825	3	0
3.43	157.69	194.924	1	1.543	2.527	0.647	3	0
3.978	45.82	50.747	0	2.574	2.168	1.014	1	0
4.489	71.84	83.644	2	1.969	2.168	0.531	2	0
3.718	91.64	101.494	0	2.239	2.334	0.884	2	0
5.402	91.64	101.494	0	2.507	2.334	0.543	2	0
4.606	111.87	144.177	1	1.395	2.334	0.716	2	0
3.591	91.64	101.494	0	1.886	2.287	0.769	2	0
4.558	45.82	50.747	0	2.574	2.141	1.014	1	0
4.611	45.82	50.747	0	2.842	2.141	0.726	1	0
4.62	45.82	50.747	0	3.11	2.141	0.478	1	0
3.615	45.82	50.747	0	1.887	2.048	0.842	1	0
4.14	45.82	50.747	0	2.241	2.09	0.942	1	0
3.575	0	0	0	3.958	2.488	0.802	0	0
5.01	7.76	0	0	2.122	2.7	1.053	2	0
5.433	9.23	11	0	3.395	2.692	0.941	0	0
4.909	0	0	0	3.876	2.539	0.837	0	0
4.7	15.79	0	1	2.859	2.614	0.752	1	0
5.069	15.79	0	1	1.834	2.176	0.81	1	0
6.004	0	0	0	5.551	3.231	0.689	0	0
6.281	0	0	0	4.76	2.868	0.7	0	0
5.406	0	0	0	4.332	2.7	0.758	0	0
6.7	0	0	0	4.332	2.727	0.758	0	0
4.737	13.14	9.507	0	3.743	2.995	0.783	0	0
6.027	28.24	0	0	4.76	2.995	0.65	0	0
4.147	0	0	0	3.386	2.284	0.805	0	0
3.711	12.89	16.786	0	2.066	2.284	0.867	1	0
4.851	12.89	16.786	0	3.051	2.727	0.8	1	0
3.53	12.89	16.786	0	2.066	2.284	0.867	1	0
3.619	132.86	33.571	0	2.892	3.487	0.572	2	0
5.597	28.24	0	0	3.876	2.614	0.652	0	0
3.357	28.24	0	0	2.851	2.176	0.656	0	0
1.815	12.89	16.786	0	0.468	1.8	1.038	1	0
2.421	28.24	0	0	1.173	1.667	0.667	0	0
5.054	79.63	77.875	2	1.326	3.024	1.126	5	0
3.89	0	0	0	2.734	1.857	0.831	0	0
4.779	278.8	413.191	5	-0.321	6.439	1.557	11	11
3.792	0	0	0	3.374	2.075	1.204	0	0
5.993	17.07	25.145	0	0.094	1.334	1.328	0	0
1.057	23.79	31.059	0	-0.317	1.155	1.403	1	1
4.886	26.3	36.145	0	2.754	2.454	1.421	0	1
5.541	43.37	61.29	0	3.626	3.373	1.111	0	1
3.638	58.11	32.897	2	-0.317	1.225	0.575	1	1
1.22	40.46	85.367	2	0.706	1.689	1.594	0	0
2.614	29.46	53.683	1	1.629	2.353	1.2	0	0
4.762	38.33	54.156	1	2.378	2.587	1.055	1	0
2.829	45.34	34.106	0	1.297	2.042	1.933	0	0
5.37	40.46	85.367	2	3.956	3.123	0.959	0	0
4.819	0	0	0	3.477	1.857	1.429	0	0
4.039	17.07	25.145	0	1.442	1.84	1.58	0	0
5.47	0	0	0	4.203	1.997	1.625	0	0
5.299	0	0	0	4.823	2.299	1.6	0	0
6.194	52.6	72.29	0	6.338	4.16	1.402	0	2
3.52	56.15	36.022	2	1.971	2.472	1.144	2	0
4.862	54.57	41.028	0	3.234	2.901	1.984	0	0
7.676	102.78	20.263	0	3.322	2.901	0.874	0	0
4.943	47.36	56.055	0	3.373	3.471	0.992	3	0
7.012	94.88	104.618	0	4.066	3.016	1.314	3	0
5.548	45.61	28.269	0	3.092	2.814	0.948	1	0
3.078	20.31	28.269	0	2.821	2.502	1.283	1	1
5.976	121.26	6.249	0	1.761	2.66	0.779	2	0
3.936	70.14	50.908	3	-0.273	1.577	0.756	2	0
3.118	12.03	18.011	1	0.8	1.509	1.846	1	0
5.46	12.03	18.011	1	2.193	2.134	1.117	1	0
3.601	62.73	86.378	2	2.59	2.546	1.277	5	0
3.63	88.03	86.378	2	2.273	2.575	1.159	5	0
2.09	26.3	36.145	0	0.586	1.577	1.881	0	1
5.762	107.02	52.33	0	0.64	2.614	1.233	1	0
6.56	54.57	41.028	0	4.449	2.988	1.497	0	0
8.113	82.67	47.447	1	3.747	2.935	1.513	1	0
9.15	129.95	30.53	0	1.145	2.637	1.444	0	0
4.502	0	0	0	2.942	1.989	1.063	0	0
1.983	91.49	117.376	5	-0.329	1.868	1.621	5	0
5.551	3.24	3.124	0	4.761	3.273	1.052	1	0
5.418	44.45	16.786	0	1.157	1.334	0.685	1	1
2.958	12.03	18.011	1	-0.172	1.155	2.177	1	0
6.964	75.99	73.774	1	0.057	2.093	1.123	2	1
4.91	47.56	65.155	1	1.57	2.644	1.376	1	0
3.825	56.15	36.022	2	-0.273	1.559	0.876	2	0
5.783	21.26	73.891	1	4.153	3.383	1.121	1	0
6.389	103.56	133.775	0	3.168	4.055	1.153	3	2
4.071	110.45	141.047	1	2.767	3.488	1.216	2	2
6.119	67.01	70.941	2	1.052	2.676	1.137	3	0
2.506	71.06	94.289	0	0.977	3.191	1.146	0	0
9.099	54.57	41.028	0	1.246	2.086	1.875	0	0
5.6	124.73	67.257	0	1.02	2.969	0.946	1	2
8.028	63.22	80.144	0	1.936	3.852	1.151	0	0
7.087	18.46	22	0	4.268	3.164	0.857	0	0
3.794	46.53	78.828	1	2.758	2.856	1.022	0	1
0.495	36.28	22.156	0	-0.317	1.225	1.333	0	0
4.823	7.76	0	0	1.586	2.674	1.166	2	0
6.19	0	0	0	4.588	2.744	0.807	0	0
4.3	0	0	0	3.259	1.979	1.111	0	0
4.01	45.82	50.747	0	2.241	2.119	0.942	1	0
4.038	20.23	42.683	1	2.193	1.96	1.02	0	0
3.002	0	0	0	2.608	1.857	1	0	0
5.312	26.02	32.897	2	1.859	1.908	0.917	1	0
5.513	12.53	11	0	4.452	2.716	0.49	0	0
3.492	0	0	0	2.226	1.401	0.57	0	0
2.608	0	0	0	2.226	1.509	0.826	0	0
2.778	9.23	11	0	1.587	1.84	1.05	0	0
2.659	0	0	0	1.364	1.155	0.576	0	0
5.389	0	0	0	4.092	2.12	0.53	0	0
5.559	26.02	32.897	2	3.617	2.074	0.288	1	0
5.76	20.23	42.683	1	3.617	2.074	0.34	0	0
5.61	20.23	42.683	1	3.617	2.074	0.34	0	0
5.55	0	0	0	4.366	2.031	0.57	0	0
4.251	45.82	50.747	0	3.11	2.154	0.478	1	0
7.509	0	0	0	6.232	2.766	0.493	0	0
6.67	0	0	0	5.472	2.657	0.577	0	0
5.02	50.94	76.132	1	4.013	3.218	1.104	3	0
4.821	32.67	45.055	0	3.355	3.097	0.889	2	1
5.422	0	0	0	4.416	2.57	0.723	0	0
6.21	47.58	62.119	0	3.133	2.324	0.467	2	2
3.839	126.44	152.848	3	-0.172	2.629	1.025	4	0
5.437	26.02	32.897	2	2.729	1.975	0.462	1	0
5.381	52.04	65.794	4	3.586	2.758	0.518	2	0
6.108	26.02	32.897	2	2.127	1.918	0.597	1	0
5.19	26.02	32.897	2	2.127	1.908	0.597	1	0
4.006	115.47	84.479	4	0.038	2.278	0.544	5	1
4.535	57.53	110.512	2	3.31	3.267	1.169	0	0
8.164	39.44	45.652	0	4.332	4.121	1.12	0	1
4.906	20.31	28.269	0	0.198	1.782	1.559	1	1
4.022	87.28	110.688	1	2.843	3.244	0.745	3	1
3.47	47.56	65.155	1	1.191	2.899	1.265	1	0
4.462	37.3	67.828	1	1.667	2.031	0.867	0	0
2.764	74.6	135.657	2	-0.45	1.823	1.075	0	2
3.474	46.53	78.828	1	2.378	2.472	0.988	0	1
3.103	155.68	277.562	4	-1.358	3.033	1.552	2	4
3.908	116.67	180.366	4	-1.96	2.021	1.83	1	1
4.121	49.33	85.839	2	3.988	3.047	0.694	1	1
2.579	20.23	42.683	1	0.347	1.334	0.961	0	0
2.959	23.47	45.808	1	-0.081	1.577	2.001	1	0
0.46	58.92	107.366	2	-0.937	2.299	1.936	0	0
6.11	20.23	42.683	1	3.617	2.074	0.34	0	0
5.461	20.23	42.683	1	3.314	2.027	0.409	0	0
3.531	56.15	36.022	2	3.112	2.997	0.701	2	0
5.922	105.86	19.91	0	0.623	2.116	0.508	2	0
3.64	45.82	50.747	0	2.509	2.09	0.617	1	0
6.173	0	0	0	4.76	2.859	0.7	0	0
4.651	24.06	35.776	2	3.326	2.837	0.849	2	0
3.953	9.23	11	0	3.275	2.727	0.874	0	0
6.219	0	0	0	5.165	3.111	0.732	0	0
4.995	13.14	9.507	0	2.859	2.614	0.827	0	0
2.48	0	0	0	2.255	1.8	0.917	0	0
