# Supplementary material for: A methodology for the design of experiments in computational intelligence with multiple regression models
Source: PeerJ. 2016 Dec 1;4:e2721. doi: 10.7717/peerj.2721 (PMC5136129; doi:10.7717/peerj.2721)
Supplement: Data S1 — Datailed results from UC Irvine Machine Learning Repository (Housing, Machine CPU, Wine Quality, Automobile and Parkinson) and the 3 Use Cases (Protein Corona, Gajewicz Metal Oxides and Aquatic Toxicity) [file peerj-04-2721-s001.zip › 1_housing/RRegrsResAllSplits.csv]

	RegrMeth	Split.No	CVtype	NoModelFeats	ModelFeats	adjR2.tr	RMSE.tr	R2.tr	RMSEsd.tr	R2sd.tr	adjR2.ts	RMSE.ts	R2.ts	corP.ts	adjR2.both	RMSE.both	R2.both
1	svmRFE	10	repeatedcv	12	V5+V10+V3+V9+V12+V6+V7+V4+V8+V14+V2+V13	0.774454872683012	0.119384487942724	0.728574943805346	0.0245775554023356	0.097225051868896	0.703799290017943	0.112111201781932	0.73223455817622	0.855707051610667	0.764047220673052	0.108065452705823	0.769654019389732
2	rfRFE	10	repeatedcv	12	V7+V14+V9+V6+V2+V12+V4+V8+V13+V10+V3+V5	0.976824715905409	0.0739552909501826	0.871274101626924	0.0239864182577963	0.0844866345499653	0.876482466095789	0.0694725928094196	0.888340149350593	0.942517983568798	0.954607321101635	0.0453510715519463	0.955685959016051
3	rf	10	repeatedcv	12	V2+V3+V4+V5+V6+V7+V8+V9+V10+V12+V13+V14	0.980463277660933	0.0717405894661114	0.878153268081861	0.0149501616168867	0.0560796896021531	0.849946232841448	0.0746709981910751	0.864351394488669	0.929705004013998	0.950991918829595	0.0452158544100024	0.95215646729305
4	nnet	10	LOOCV	12	V2+V3+V4+V5+V6+V7+V8+V9+V10+V12+V13+V14	0.916159290762735	0.0749592729440582	0.867144108240971	NA	NA	0.821762619811395	0.0821928854237126	0.8388734083095	0.915900326623755	0.896222747465103	0.0650430178340838	0.898688741584744
5	nnet	10	repeatedcv	12	V2+V3+V4+V5+V6+V7+V8+V9+V10+V12+V13+V14	0.918028283502248	0.0761904346806884	0.865945075959497	0.0174336806362845	0.0526525063759803	0.737790355317418	0.099799750615026	0.762962481206946	0.873477235654682	0.878092845382047	0.0705106593248071	0.880989649056137
6	svmRadial	10	LOOCV	12	V2+V3+V4+V5+V6+V7+V8+V9+V10+V12+V13+V14	0.930271090217205	0.0761859387017487	0.861846891064589	NA	NA	0.813485919868298	0.0835085621330137	0.831391271560942	0.91180659767351	0.904938186299222	0.062383117206042	0.90719708088221
7	svmRadial	10	repeatedcv	12	V2+V3+V4+V5+V6+V7+V8+V9+V10+V12+V13+V14	0.930271090217205	0.0756707445383834	0.860511027421102	0.020710861075287	0.0734201702372989	0.813485919868298	0.0835085621330137	0.831391271560942	0.91180659767351	0.904938186299222	0.062383117206042	0.90719708088221
8	glmnet	10	LOOCV	12	V2+V3+V4+V5+V6+V7+V8+V9+V10+V12+V13+V14	0.72681348742886	0.110485839608776	0.708039586725363	NA	NA	0.699653366008038	0.105952157458151	0.728486642871267	0.853514289787386	0.727436487433968	0.105371687781071	0.73391324416821
9	glmnet	10	repeatedcv	12	V2+V3+V4+V5+V6+V7+V8+V9+V10+V12+V13+V14	0.727040649089321	0.107494321857086	0.729526846729401	0.0249605624623742	0.101415971855576	0.699771552380154	0.105935700302858	0.728593483351659	0.853576876064282	0.727636365663556	0.105341592899371	0.734108372816105
10	lasso.RMSE	10	repeatedcv	12	V2+V3+V4+V5+V6+V7+V8+V9+V10+V12+V13+V14	0.726411708605289	0.107578744785128	0.72924917906231	0.0250578767770605	0.101755481538248	0.699268460405585	0.10602106691704	0.728138688206649	0.853310428980362	0.727059795110228	0.105456581658081	0.733545502949193
11	pls	10	LOOCV	12	V2+V3+V4+V5+V6+V7+V8+V9+V10+V12+V13+V14	0.670701235923513	0.119341660606878	0.659248820552228	NA	NA	0.671377041511066	0.110720844508612	0.702924845526003	0.838406133998317	0.679167802994962	0.114284150225681	0.686791538369339
12	pls	10	repeatedcv	12	V2+V3+V4+V5+V6+V7+V8+V9+V10+V12+V13+V14	0.670701235923513	0.116890826771595	0.681789598709951	0.0237578993788005	0.0927889317472385	0.671377041511066	0.110720844508612	0.702924845526003	0.838406133998317	0.679167802994962	0.114284150225681	0.686791538369339
13	glmStepAIC	10	LOOCV	12	V2+V3+V4+V5+V6+V7+V8+V9+V10+V12+V13+V14	0.726597533740636	0.110106577445883	0.710148542173134	0	0	0.700361260733765	0.105873479479221	0.729126579703323	0.853889090985078	0.727373352797055	0.105359383519383	0.733851609760293
14	glmStepAIC	10	repeatedcv	12	V2+V3+V4+V5+V6+V7+V8+V9+V10+V12+V13+V14	0.726597533740636	0.107595779265235	0.72936074142289	0.0245467544406636	0.0989824545739298	0.700361260733765	0.105873479479221	0.729126579703323	0.853889090985078	0.727373352797055	0.105359383519383	0.733851609760293
15	lm	10	LOOCV	12	V2+V3+V4+V5+V6+V7+V8+V9+V10+V12+V13+V14	0.727628789808	0.110510452162083	0.708101668612255	0	0	0.699947059415485	0.105937227580883	0.728752141711598	0.853669808363631	0.728057939943584	0.105226515488108	0.734519929489479
16	lm	10	repeatedcv	12	V2+V3+V4+V5+V6+V7+V8+V9+V10+V12+V13+V14	0.727628789808	0.107599064196833	0.729874160371191	0.0242506553149052	0.0973990671053947	0.699947059415485	0.105937227580883	0.728752141711598	0.853669808363631	0.728057939943584	0.105226515488108	0.734519929489479
17	svmRFE	9	repeatedcv	12	V10+V3+V4+V6+V12+V5+V7+V8+V9+V14+V2+V13	0.78114551567557	0.123829327102239	0.731477754021575	0.0186110071437123	0.0786796825884564	0.766861986031902	0.103759051275563	0.789243235372839	0.888393626368874	0.782673885259253	0.110049894647186	0.787838070163983
18	rfRFE	9	repeatedcv	12	V7+V14+V9+V6+V12+V2+V4+V8+V13+V10+V3+V5	0.973891260826637	0.0810179649943772	0.843548036730119	0.021519508706895	0.0756831453795519	0.931159423116215	0.0586082373561384	0.937768118497058	0.968384282450442	0.963227527734024	0.0426016357168843	0.964101329055196
19	rf	9	repeatedcv	12	V2+V3+V4+V5+V6+V7+V8+V9+V10+V12+V13+V14	0.975560368953048	0.0791964547962054	0.852125815076627	0.0207790976453598	0.073399319771709	0.933228466342263	0.0566182517792387	0.939638533573406	0.969349541483054	0.965062343416646	0.0407618703375229	0.96589254515724
20	nnet	9	LOOCV	12	V2+V3+V4+V5+V6+V7+V8+V9+V10+V12+V13+V14	0.927694442366938	0.0873244923693667	0.827272987202487	NA	NA	0.89926432897936	0.060100595376094	0.908934953397341	0.953380801882092	0.923329480056424	0.0558931599378513	0.925151353797657
21	nnet	9	repeatedcv	12	V2+V3+V4+V5+V6+V7+V8+V9+V10+V12+V13+V14	0.92465439357417	0.0850216947632991	0.830936071293345	0.0206051419374573	0.0822806297558844	0.890056226196857	0.062877935291492	0.900610828481959	0.949005178321994	0.918932451888252	0.0574400932390353	0.920858809467145
22	svmRadial	9	LOOCV	12	V2+V3+V4+V5+V6+V7+V8+V9+V10+V12+V13+V14	0.934370447842048	0.0867285730827879	0.822381512252512	NA	NA	0.893465629290816	0.0619625830620669	0.903692928878897	0.950627649965483	0.927049379824216	0.054677673898447	0.928782859907601
23	svmRadial	9	repeatedcv	12	V2+V3+V4+V5+V6+V7+V8+V9+V10+V12+V13+V14	0.934370447842048	0.0869329954888364	0.817534836739562	0.0218798489531202	0.0965930351443365	0.893465629290816	0.0619625830620669	0.903692928878897	0.950627649965483	0.927049379824216	0.054677673898447	0.928782859907601
24	glmnet	9	LOOCV	12	V2+V3+V4+V5+V6+V7+V8+V9+V10+V12+V13+V14	0.723581584075029	0.112114767319721	0.702542531804316	NA	NA	0.710791846080125	0.103222024733354	0.738555828856433	0.859392709334	0.726574331792965	0.105569633158752	0.733071575393924
25	glmnet	9	repeatedcv	12	V2+V3+V4+V5+V6+V7+V8+V9+V10+V12+V13+V14	0.723297370619278	0.108966971632465	0.722184009822928	0.0271559942426193	0.117300771478988	0.708843321716072	0.103489627831226	0.736794362831329	0.858367265703515	0.725909892539079	0.105695990486183	0.732422924795576
26	lasso.RMSE	9	repeatedcv	11	V2+V3+V4+V5+V6+V7+V9+V10+V12+V13+V14	0.723416255519613	0.109017127169709	0.721601637298527	0.0271738802662407	0.117885087081184	0.711467002968559	0.103505454476613	0.736857906707326	0.858404279292296	0.725969232319948	0.105796835590073	0.731938219338721
27	pls	9	LOOCV	12	V2+V3+V4+V5+V6+V7+V8+V9+V10+V12+V13+V14	0.663702208344991	0.121129627194471	0.652639106646717	NA	NA	0.666261263696761	0.110418995136735	0.698300182381872	0.835643573769267	0.672014464981103	0.11560778862003	0.67980818066472
28	pls	9	repeatedcv	12	V2+V3+V4+V5+V6+V7+V8+V9+V10+V12+V13+V14	0.663702208344991	0.118067939994067	0.673680267697072	0.026025257060993	0.113907195531762	0.666261263696761	0.110418995136735	0.698300182381872	0.835643573769267	0.672014464981103	0.11560778862003	0.67980818066472
29	glmStepAIC	9	LOOCV	12	V2+V3+V4+V5+V6+V7+V8+V9+V10+V12+V13+V14	0.723828213394253	0.113448283581251	0.695768010676573	0	0	0.711962409527444	0.1030988654076	0.73961401821281	0.860008150085108	0.727066683508655	0.105495203998059	0.733552227662904
30	glmStepAIC	9	repeatedcv	12	V2+V3+V4+V5+V6+V7+V8+V9+V10+V12+V13+V14	0.723828213394253	0.109958145099983	0.716784082294486	0.0263493731785927	0.114078660218542	0.711962409527444	0.1030988654076	0.73961401821281	0.860008150085108	0.727066683508655	0.105495203998059	0.733552227662904
31	lm	9	LOOCV	12	V2+V3+V4+V5+V6+V7+V8+V9+V10+V12+V13+V14	0.72385279141762	0.112256972850073	0.70202408865181	0	0	0.711761843410677	0.103130477783429	0.739432706443252	0.859902730803463	0.727045405325349	0.105499320281598	0.733531455099797
32	lm	9	repeatedcv	12	V2+V3+V4+V5+V6+V7+V8+V9+V10+V12+V13+V14	0.72385279141762	0.109196178929345	0.721129614020905	0.0261089704558563	0.111586183813375	0.711761843410677	0.103130477783429	0.739432706443252	0.859902730803463	0.727045405325349	0.105499320281598	0.733531455099797
33	svmRFE	8	repeatedcv	8	V5+V10+V12+V8+V6+V4+V7+V3	0.669427208609152	0.120782546472211	0.690815725382991	0.0287659247516075	0.137293185696379	0.714315409819645	0.118047768610944	0.732599223591188	0.855920103509193	0.684831503411835	0.116844703045418	0.689824271674618
34	rfRFE	8	repeatedcv	12	V7+V14+V6+V9+V2+V12+V8+V4+V13+V10+V3+V5	0.978726575958501	0.0683759845530075	0.889955138308437	0.0202395418142571	0.0487146009999872	0.837849477281451	0.0855206677759016	0.853415927462432	0.923805135005447	0.942061469954614	0.0506524141068494	0.943438227104207
35	rf	8	repeatedcv	12	V2+V3+V4+V5+V6+V7+V8+V9+V10+V12+V13+V14	0.980020091869919	0.0689176234294017	0.882863283699291	0.0179811281926294	0.0577088744494269	0.84266028980903	0.0834578316477507	0.857764901987363	0.926155981456343	0.944289509681314	0.0489833193095349	0.945613323312649
36	nnet	8	LOOCV	12	V2+V3+V4+V5+V6+V7+V8+V9+V10+V12+V13+V14	0.941690173064615	0.0751771805891085	0.85988092468018	NA	NA	0.751330772805073	0.105463011287154	0.775203018615786	0.880456142357918	0.891492632383411	0.0666476470871923	0.89407102527727
37	nnet	8	repeatedcv	12	V2+V3+V4+V5+V6+V7+V8+V9+V10+V12+V13+V14	0.920164649559911	0.0724693579285357	0.864538502007477	0.0170415871608624	0.0652782732004779	0.798686599381571	0.0937101607930855	0.818012685840941	0.904440537482117	0.890167234788746	0.0669011340561501	0.892777122278915
38	svmRadial	8	LOOCV	12	V2+V3+V4+V5+V6+V7+V8+V9+V10+V12+V13+V14	0.943633774972282	0.0793940045339964	0.840332256310014	NA	NA	0.861065851850896	0.0782249768842068	0.87440353007321	0.935095465753743	0.923446503958995	0.0562656659975322	0.925265596934227
39	svmRadial	8	repeatedcv	12	V2+V3+V4+V5+V6+V7+V8+V9+V10+V12+V13+V14	0.943633774972282	0.0786597298246171	0.844833889130578	0.0224525821547946	0.0781250436616661	0.861065851850896	0.0782249768842068	0.87440353007321	0.935095465753743	0.923446503958995	0.0562656659975322	0.925265596934227
40	glmnet	8	LOOCV	12	V2+V3+V4+V5+V6+V7+V8+V9+V10+V12+V13+V14	0.730062670651073	0.107002455206129	0.709702768578774	NA	NA	0.675744372442837	0.118571257700689	0.706872912688324	0.840757344712685	0.723883082309846	0.106024840610571	0.730444276393572
41	glmnet	8	repeatedcv	12	V2+V3+V4+V5+V6+V7+V8+V9+V10+V12+V13+V14	0.730138754851575	0.104500089534942	0.731471825124694	0.0215864400459783	0.0903054646487586	0.675917683163512	0.118533357887573	0.707029585579815	0.8408505132185	0.723987234287967	0.106001727105792	0.730545953473203
42	lasso.RMSE	8	repeatedcv	12	V2+V3+V4+V5+V6+V7+V8+V9+V10+V12+V13+V14	0.728974954832376	0.104452122526262	0.731809559889871	0.0215608910389673	0.089601145490529	0.674640880938194	0.118827800901203	0.705875356368127	0.840163886612682	0.722799295358361	0.106269570697702	0.72938624279539
43	pls	8	LOOCV	12	V2+V3+V4+V5+V6+V7+V8+V9+V10+V12+V13+V14	0.655118919750305	0.118621745591319	0.643144928098708	NA	NA	0.664697114682842	0.122306161249794	0.696886191673289	0.834797096109761	0.666294631479606	0.116676003717997	0.674224263998902
44	pls	8	repeatedcv	12	V2+V3+V4+V5+V6+V7+V8+V9+V10+V12+V13+V14	0.655118919750305	0.115848217448401	0.666466058129999	0.0232909693081292	0.109074384638255	0.664697114682842	0.122306161249794	0.696886191673289	0.834797096109761	0.666294631479606	0.116676003717997	0.674224263998902
45	glmStepAIC	8	LOOCV	12	V2+V3+V4+V5+V6+V7+V8+V9+V10+V12+V13+V14	0.729795465052033	0.10718805637635	0.708903887375318	0	0	0.676470073034336	0.118431064390854	0.70752894602304	0.841147398511723	0.723893108775084	0.10601829262124	0.730454064606171
46	glmStepAIC	8	repeatedcv	12	V2+V3+V4+V5+V6+V7+V8+V9+V10+V12+V13+V14	0.729795465052033	0.104657763576597	0.730978338036592	0.0208673155024279	0.0867561902255492	0.676470073034336	0.118431064390854	0.70752894602304	0.841147398511723	0.723893108775084	0.10601829262124	0.730454064606171
47	lm	8	LOOCV	12	V2+V3+V4+V5+V6+V7+V8+V9+V10+V12+V13+V14	0.730174116662208	0.106992970412867	0.709987898943096	0	0	0.675956508076351	0.118518431684292	0.707064683301021	0.84087138332864	0.72403072500039	0.105991399124098	0.730588410742955
48	lm	8	repeatedcv	12	V2+V3+V4+V5+V6+V7+V8+V9+V10+V12+V13+V14	0.730174116662208	0.104478859260604	0.732002420939376	0.0209677446575521	0.0867001300181988	0.675956508076351	0.118518431684292	0.707064683301021	0.84087138332864	0.72403072500039	0.105991399124098	0.730588410742955
49	svmRFE	7	repeatedcv	12	V10+V4+V12+V5+V7+V3+V8+V14+V6+V9+V13+V2	0.786890720039735	0.123837988895632	0.742556591103809	0.0176789763928838	0.0783504671401462	0.702885376090266	0.115633941685945	0.731408379985601	0.855224169434892	0.775278778983331	0.112882614900547	0.780618689185707
50	rfRFE	7	repeatedcv	12	V7+V14+V9+V6+V12+V2+V4+V8+V13+V10+V3+V5	0.978781833630428	0.0737655693583515	0.879426672994124	0.0176644141281304	0.0582536568029242	0.87900603458158	0.0621019061762608	0.890621455261748	0.94372742635877	0.960206081763391	0.0424612929730937	0.961151679820499
51	rf	7	repeatedcv	12	V2+V3+V4+V5+V6+V7+V8+V9+V10+V12+V13+V14	0.980491784936813	0.0730336163372736	0.882728586581932	0.0168818511782697	0.0499347100524106	0.874291704102869	0.0627666215666729	0.886359700508993	0.94146678141557	0.9605448446247	0.0414430049706194	0.961482392871242
52	nnet	7	LOOCV	12	V2+V3+V4+V5+V6+V7+V8+V9+V10+V12+V13+V14	0.919832130499497	0.0798198537761268	0.857714486268849	NA	NA	0.834954990526118	0.0724057772023901	0.850799311435611	0.922387831357077	0.904990493175578	0.0622181405946483	0.907248144822891
53	nnet	7	repeatedcv	12	V2+V3+V4+V5+V6+V7+V8+V9+V10+V12+V13+V14	0.934307339206528	0.0809596984121479	0.854344079844859	0.0191662404603267	0.0672048971101236	0.81259087226078	0.0770312535737949	0.830582148523744	0.911362797421392	0.912050210744716	0.0598541623447694	0.91414010672702
54	svmRadial	7	LOOCV	12	V2+V3+V4+V5+V6+V7+V8+V9+V10+V12+V13+V14	0.944276351158904	0.081688218031535	0.848658983188209	NA	NA	0.831938123324527	0.0723968961257245	0.848072063485372	0.920908281798667	0.92390020224886	0.0557668189899712	0.92570851427463
55	svmRadial	7	repeatedcv	12	V2+V3+V4+V5+V6+V7+V8+V9+V10+V12+V13+V14	0.938634315012609	0.0805131139615834	0.849659162549276	0.0209163237760347	0.074100826244754	0.838366945516323	0.0709839370742426	0.853883718746756	0.924058287526688	0.920664059256032	0.0570163771688049	0.922549269729156
56	glmnet	7	LOOCV	12	V2+V3+V4+V5+V6+V7+V8+V9+V10+V12+V13+V14	0.719766498924229	0.114690469611872	0.701063430991709	NA	NA	0.724457219422516	0.0930231373085308	0.750909326357954	0.866550244566323	0.726693448197468	0.10546826428201	0.733187861309607
57	glmnet	7	repeatedcv	12	V2+V3+V4+V5+V6+V7+V8+V9+V10+V12+V13+V14	0.719894246994685	0.111909921781619	0.722376329561896	0.0256407790114151	0.103206126127192	0.72468246017016	0.0930242835272412	0.751112943993825	0.866667724098357	0.726840204369332	0.105444011268333	0.733331130206101
58	lasso.RMSE	7	repeatedcv	12	V2+V3+V4+V5+V6+V7+V8+V9+V10+V12+V13+V14	0.71892184701711	0.111964584059036	0.722102228203452	0.0256662385195417	0.103714553005826	0.722097000735836	0.0933696661287853	0.748775688665196	0.865318258599225	0.725544146711657	0.105688250454033	0.732065869958113
59	pls	7	LOOCV	12	V2+V3+V4+V5+V6+V7+V8+V9+V10+V12+V13+V14	0.651063954434774	0.125879949215563	0.639912096576313	NA	NA	0.657069989101392	0.103662738116997	0.689991270147659	0.83065713152158	0.660014435978941	0.117646248949786	0.66809330086657
60	pls	7	repeatedcv	12	V2+V3+V4+V5+V6+V7+V8+V9+V10+V12+V13+V14	0.651063954434774	0.123466935112066	0.66219120084677	0.0250071906001422	0.110449646624639	0.657069989101392	0.103662738116997	0.689991270147659	0.83065713152158	0.660014435978941	0.117646248949786	0.66809330086657
61	glmStepAIC	7	LOOCV	12	V2+V3+V4+V5+V6+V7+V8+V9+V10+V12+V13+V14	0.719411305157503	0.11511888578086	0.699016406681474	0	0	0.725131690748483	0.0931030223712387	0.751519048436629	0.866901983177238	0.726518206853236	0.105528965086137	0.73301678411613
62	glmStepAIC	7	repeatedcv	12	V2+V3+V4+V5+V6+V7+V8+V9+V10+V12+V13+V14	0.719411305157503	0.112121443422166	0.721515261117549	0.0250838967374591	0.101035171758552	0.725131690748483	0.0931030223712387	0.751519048436629	0.866901983177238	0.726518206853236	0.105528965086137	0.73301678411613
63	lm	7	LOOCV	12	V2+V3+V4+V5+V6+V7+V8+V9+V10+V12+V13+V14	0.720001879568714	0.114937080183351	0.700098501069579	0	0	0.724150951630155	0.0932441171369862	0.75063246027366	0.866390477944939	0.726815228659823	0.105470437889945	0.733306747978798
64	lm	7	repeatedcv	12	V2+V3+V4+V5+V6+V7+V8+V9+V10+V12+V13+V14	0.720001879568714	0.11204216846504	0.722083561942811	0.0248127211970816	0.0991630009891149	0.724150951630155	0.0932441171369862	0.75063246027366	0.866390477944939	0.726815228659823	0.105470437889945	0.733306747978798
65	svmRFE	6	repeatedcv	12	V5+V3+V10+V4+V7+V8+V12+V6+V9+V14+V2+V13	0.768495454367869	0.122040435640716	0.747356740172946	0.0147301057871829	0.0878383110300492	0.745858618255479	0.110753767365857	0.770256190902953	0.877642404913842	0.768024595295052	0.111978781259441	0.773536882139526
66	rfRFE	6	repeatedcv	12	V7+V14+V6+V9+V2+V12+V4+V8+V13+V10+V3+V5	0.976279821461405	0.0748327320729755	0.860705336177236	0.0203357168132875	0.125476751892425	0.844955661636168	0.0743713619195197	0.859839918119096	0.927275535166919	0.9488391771837	0.0474187048157028	0.950054879904087
67	rf	6	repeatedcv	12	V2+V3+V4+V5+V6+V7+V8+V9+V10+V12+V13+V14	0.976343889239752	0.074977713739303	0.869140811597503	0.0195429293114507	0.0842175925580381	0.849410263758035	0.0734631122289519	0.863866878437264	0.929444392331926	0.949847116925665	0.0471016934491622	0.951038868602679
68	nnet	6	LOOCV	12	V2+V3+V4+V5+V6+V7+V8+V9+V10+V12+V13+V14	0.931328005153163	0.0815973122864847	0.849311017515925	NA	NA	0.865777045411782	0.0697777229935915	0.878662449052251	0.937369963809515	0.917995988799306	0.0578386729141883	0.919944598966452
69	nnet	6	repeatedcv	12	V2+V3+V4+V5+V6+V7+V8+V9+V10+V12+V13+V14	0.930569091740632	0.0819025757448593	0.840886813531089	0.0253108681136337	0.0987235234682569	0.879596075200569	0.0648199457257875	0.891154851981315	0.944009985106786	0.921295384673937	0.0566455724490624	0.923165593354953
70	svmRadial	6	LOOCV	12	V2+V3+V4+V5+V6+V7+V8+V9+V10+V12+V13+V14	0.930953871617429	0.0799630298322486	0.850528382021163	NA	NA	0.880071368793901	0.0653836604337399	0.891584517389687	0.944237532292424	0.92063981506649	0.0569820827588854	0.922525601639168
71	svmRadial	6	repeatedcv	12	V2+V3+V4+V5+V6+V7+V8+V9+V10+V12+V13+V14	0.925097296574933	0.07908100041138	0.847858632462067	0.0239453645484255	0.0856029744694192	0.881563879985459	0.0647513482675908	0.892933747506855	0.944951717024132	0.916739184540377	0.0583889506708093	0.91871765936318
72	glmnet	6	LOOCV	11	V2+V3+V4+V5+V6+V7+V9+V10+V12+V13+V14	0.719382252579911	0.113129614189329	0.700328089045536	NA	NA	0.722666709947276	0.0987653054053027	0.747072039471916	0.864333291891453	0.726196944332428	0.105687341261709	0.732160971287563
73	glmnet	6	repeatedcv	11	V2+V3+V4+V5+V6+V7+V9+V10+V12+V13+V14	0.719282866199326	0.111614624538936	0.717983092725749	0.0217138306518847	0.0973406876462339	0.722274377367304	0.0988368948399457	0.746714232158981	0.864126282529921	0.726036855961098	0.10572091272946	0.732004369989668
74	lasso.RMSE	6	repeatedcv	10	V2+V3+V5+V6+V7+V9+V10+V12+V13+V14	0.719678482928623	0.111425993059374	0.718916043820647	0.0219039342701946	0.0992846398838586	0.723460852661657	0.0990659146787316	0.745583984448725	0.863472051921036	0.726045274929175	0.105837549767901	0.731470120970181
75	pls	6	LOOCV	12	V2+V3+V4+V5+V6+V7+V8+V9+V10+V12+V13+V14	0.651580608614662	0.123687408410701	0.641740102159052	NA	NA	0.639547434055989	0.112183255902846	0.674150880386614	0.821066915900655	0.657214416155087	0.118120148047074	0.665359816167243
76	pls	6	repeatedcv	12	V2+V3+V4+V5+V6+V7+V8+V9+V10+V12+V13+V14	0.651580608614662	0.121718443334353	0.661991610472502	0.0246123218738269	0.123695047434604	0.639547434055989	0.112183255902846	0.674150880386614	0.821066915900655	0.657214416155087	0.118120148047074	0.665359816167243
77	glmStepAIC	6	LOOCV	12	V2+V3+V4+V5+V6+V7+V8+V9+V10+V12+V13+V14	0.719167657562573	0.112806507539849	0.702249973065534	0	0	0.722505348402144	0.0983641898471643	0.749144834955538	0.865531533195376	0.726552278976099	0.105495272427797	0.73305004660439
78	glmStepAIC	6	repeatedcv	12	V2+V3+V4+V5+V6+V7+V8+V9+V10+V12+V13+V14	0.719167657562573	0.111318786462118	0.71954509110554	0.0213829292416424	0.0949911692242288	0.722505348402144	0.0983641898471643	0.749144834955538	0.865531533195376	0.726552278976099	0.105495272427797	0.73305004660439
79	lm	6	LOOCV	12	V2+V3+V4+V5+V6+V7+V8+V9+V10+V12+V13+V14	0.719243406609302	0.113542103531764	0.698442686305269	0	0	0.723568447313662	0.0981736465660921	0.75010587637155	0.866086529378878	0.726838636557887	0.105439912917889	0.733329599649581
80	lm	6	repeatedcv	12	V2+V3+V4+V5+V6+V7+V8+V9+V10+V12+V13+V14	0.719243406609302	0.111595464171233	0.718213837432751	0.0214078886870394	0.0960062537020115	0.723568447313662	0.0981736465660921	0.75010587637155	0.866086529378878	0.726838636557887	0.105439912917889	0.733329599649581
81	svmRFE	5	repeatedcv	12	V10+V5+V3+V12+V4+V9+V8+V7+V6+V14+V13+V2	0.81217763673245	0.111188204331608	0.772136289117099	0.022888398090616	0.0821650154302635	0.646505508965204	0.132003436423884	0.680440980104544	0.824888465251239	0.767488194859116	0.109572677517479	0.773013227852563
82	rfRFE	5	repeatedcv	12	V7+V14+V9+V6+V12+V2+V8+V4+V13+V10+V5+V3	0.975813409926251	0.072692848936143	0.870223845878793	0.0201952886435625	0.0560469780684312	0.830528048697967	0.094988450981101	0.846797356022963	0.920215929020446	0.932923499153609	0.0553415645918211	0.934517396203424
83	rf	5	repeatedcv	12	V2+V3+V4+V5+V6+V7+V8+V9+V10+V12+V13+V14	0.97729973327959	0.0722177912420356	0.865277395804363	0.0197217234574893	0.0796818245458316	0.823220383376919	0.0946036615798013	0.840191226572734	0.916619455702711	0.932900550565983	0.0544323284397026	0.934494992928771
84	nnet	5	LOOCV	12	V2+V3+V4+V5+V6+V7+V8+V9+V10+V12+V13+V14	0.935519284548125	0.0703493723836884	0.873949751812401	NA	NA	0.836441212794915	0.0884339289981621	0.852142856366603	0.92311584124995	0.908064444089943	0.0613672848814701	0.910249051359093
85	nnet	5	repeatedcv	12	V2+V3+V4+V5+V6+V7+V8+V9+V10+V12+V13+V14	0.919726263051263	0.0718399397934828	0.870386225956988	0.0144531079649639	0.0539541443866026	0.77775928743476	0.101748678231235	0.799094395841022	0.893920799534848	0.881214116959047	0.0695894756906938	0.884036751803584
86	svmRadial	5	LOOCV	12	V2+V3+V4+V5+V6+V7+V8+V9+V10+V12+V13+V14	0.948178237619728	0.0702104592381187	0.873200202235047	NA	NA	0.775645462017889	0.102879006276625	0.797183497664172	0.892851330101586	0.900548468621314	0.0642010630495613	0.902911673327342
87	svmRadial	5	repeatedcv	12	V2+V3+V4+V5+V6+V7+V8+V9+V10+V12+V13+V14	0.943311343288245	0.0711433357459138	0.871678293454803	0.0163287859846143	0.0576620391709962	0.7641077374481	0.105363992274747	0.786753394653082	0.886991203255749	0.893960899090831	0.0662495358754504	0.896480640102534
88	glmnet	5	LOOCV	12	V2+V3+V4+V5+V6+V7+V8+V9+V10+V12+V13+V14	0.769806840323316	0.0976852533225046	0.753902847930813	0	0	0.566574256501291	0.142469378268298	0.608183127877167	0.779860967017306	0.717171756205395	0.107511147388449	0.723892427345068
89	glmnet	5	repeatedcv	12	V2+V3+V4+V5+V6+V7+V8+V9+V10+V12+V13+V14	0.770764482301157	0.0959827142341845	0.772063191783189	0.0186564724961335	0.0762783218511526	0.570701962106132	0.141797356214879	0.611914573743944	0.782249687595939	0.719000922646494	0.107115411586564	0.725678128444993
90	lasso.RMSE	5	repeatedcv	12	V2+V3+V4+V5+V6+V7+V8+V9+V10+V12+V13+V14	0.76989523279402	0.0962778452312313	0.770877827800198	0.0188866622516042	0.0783683606784609	0.56776169630429	0.14223819435875	0.609256573459078	0.780548892420634	0.717621719615034	0.107386309176722	0.724331698554875
91	pls	5	LOOCV	12	V2+V3+V4+V5+V6+V7+V8+V9+V10+V12+V13+V14	0.701540056314683	0.10923452071785	0.69225971383994	NA	NA	0.514165847337058	0.150062177663722	0.5608059259927	0.748869765708765	0.65607630924014	0.118417119656651	0.664248753377008
92	pls	5	repeatedcv	12	V2+V3+V4+V5+V6+V7+V8+V9+V10+V12+V13+V14	0.701540056314683	0.107942154566877	0.708825327574511	0.0166842596434975	0.0689743897865698	0.514165847337058	0.150062177663722	0.5608059259927	0.748869765708765	0.65607630924014	0.118417119656651	0.664248753377008
93	glmStepAIC	5	LOOCV	12	V2+V3+V4+V5+V6+V7+V8+V9+V10+V12+V13+V14	0.770036970051547	0.100838659517886	0.738350033242962	0	0	0.579702132464601	0.14013208333022	0.620050727747999	0.787432998894509	0.72131613371496	0.106647779162103	0.727938324596981
94	glmStepAIC	5	repeatedcv	12	V2+V3+V4+V5+V6+V7+V8+V9+V10+V12+V13+V14	0.770036970051547	0.0974028298388671	0.765336402051579	0.018349493887504	0.0760312131179653	0.579702132464601	0.14013208333022	0.620050727747999	0.787432998894509	0.72131613371496	0.106647779162103	0.727938324596981
95	lm	5	LOOCV	12	V2+V3+V4+V5+V6+V7+V8+V9+V10+V12+V13+V14	0.771109737371701	0.0977067290610939	0.754009407126742	0	0	0.574580590816959	0.141193688474812	0.615420854098531	0.784487637951377	0.720338151966373	0.106854437381027	0.726983582018657
96	lm	5	repeatedcv	12	V2+V3+V4+V5+V6+V7+V8+V9+V10+V12+V13+V14	0.771109737371701	0.0959571578940339	0.772483941101019	0.0183539218525565	0.0747074048085323	0.574580590816959	0.141193688474812	0.615420854098531	0.784487637951377	0.720338151966373	0.106854437381027	0.726983582018657
97	svmRFE	4	repeatedcv	12	V4+V10+V5+V8+V6+V9+V3+V12+V7+V13+V14+V2	0.819570847293566	0.117447721487461	0.806354474590692	0.0130486815487737	0.0614903001846632	0.634313098083916	0.126561417671338	0.66941904066786	0.818180322831013	0.78301278589911	0.114298465553608	0.78816891771933
98	rfRFE	4	repeatedcv	12	V7+V14+V6+V12+V2+V9+V8+V4+V13+V10+V5+V3	0.976174303651942	0.0745127708472472	0.866858487690472	0.0213851184492544	0.0769104555105693	0.832853824897833	0.0781133547619733	0.848899857707641	0.921357616622146	0.946251955087372	0.0489467009120122	0.947529136352622
99	rf	4	repeatedcv	12	V2+V3+V4+V5+V6+V7+V8+V9+V10+V12+V13+V14	0.976341975725841	0.0750346758793426	0.862539373194549	0.0205652661001043	0.0974465321407814	0.836277189360303	0.077470570274975	0.851994579181714	0.923035524333551	0.947057875539821	0.0485859932852469	0.948315906220063
100	nnet	4	LOOCV	12	V2+V3+V4+V5+V6+V7+V8+V9+V10+V12+V13+V14	0.936966056729753	0.0773912179512152	0.863192107839838	NA	NA	0.769192426598167	0.0896645157458304	0.791349953644743	0.889578525845101	0.902679220115541	0.0629422628283178	0.904991793102895
101	nnet	4	repeatedcv	12	V2+V3+V4+V5+V6+V7+V8+V9+V10+V12+V13+V14	0.942000207303868	0.0746260667406028	0.868221773201695	0.0170949659563888	0.0668586733001876	0.771207856247223	0.0897795668055923	0.793171902047489	0.890601988571488	0.906601695071374	0.061721185717656	0.908821060733044
102	svmRadial	4	LOOCV	12	V2+V3+V4+V5+V6+V7+V8+V9+V10+V12+V13+V14	0.947803248242678	0.0717277717055493	0.879785353269055	NA	NA	0.760335677378519	0.0911866900249869	0.783343452350181	0.885066919701658	0.909379093946932	0.0608423083448853	0.911532462011559
103	svmRadial	4	repeatedcv	12	V2+V3+V4+V5+V6+V7+V8+V9+V10+V12+V13+V14	0.947803248242678	0.0735820676504951	0.872122995805516	0.0177006083964245	0.0616966333841587	0.760335677378519	0.0911866900249869	0.783343452350181	0.885066919701658	0.909379093946932	0.0608423083448853	0.911532462011559
104	glmnet	4	LOOCV	12	V2+V3+V4+V5+V6+V7+V8+V9+V10+V12+V13+V14	0.751902468060291	0.106748380304302	0.73346505673303	NA	NA	0.604151498783179	0.118957740536165	0.642152954899993	0.801344467067686	0.724596584960193	0.105987526388644	0.731140824525495
105	glmnet	4	repeatedcv	12	V2+V3+V4+V5+V6+V7+V8+V9+V10+V12+V13+V14	0.751643319900298	0.105084124204153	0.744455208988516	0.0187993604576148	0.0996308270045957	0.601340190729904	0.119186352903913	0.639611532419833	0.799757170908666	0.723708232223555	0.106103728835234	0.730273581160817
106	lasso.RMSE	4	repeatedcv	12	V2+V3+V4+V5+V6+V7+V8+V9+V10+V12+V13+V14	0.750788913031907	0.105294339526531	0.743305459779758	0.0189662174991534	0.101192624997399	0.597840897145452	0.119599829944513	0.636448171019489	0.797777018357566	0.722272569283931	0.106357449293693	0.728872032984115
107	pls	4	LOOCV	12	V2+V3+V4+V5+V6+V7+V8+V9+V10+V12+V13+V14	0.668813641065912	0.120579473320671	0.659765103827649	NA	NA	0.525154068662241	0.129312169193198	0.570739278070665	0.755472883742802	0.64530363967891	0.120229302334306	0.653732068042975
108	pls	4	repeatedcv	12	V2+V3+V4+V5+V6+V7+V8+V9+V10+V12+V13+V14	0.668813641065912	0.11931704791448	0.670312561848884	0.0183335597632842	0.101797265883265	0.525154068662241	0.129312169193198	0.570739278070665	0.755472883742802	0.64530363967891	0.120229302334306	0.653732068042975
109	glmStepAIC	4	LOOCV	12	V2+V3+V4+V5+V6+V7+V8+V9+V10+V12+V13+V14	0.750669650369339	0.106642311263215	0.734121450016338	0	0	0.609066219850236	0.117991772746102	0.646595862744614	0.804111847160962	0.725078907158707	0.105897990552445	0.731611685602461
110	glmStepAIC	4	repeatedcv	12	V2+V3+V4+V5+V6+V7+V8+V9+V10+V12+V13+V14	0.750669650369339	0.10554266285724	0.742285338978105	0.0189144030767164	0.0991981152328863	0.609066219850236	0.117991772746102	0.646595862744614	0.804111847160962	0.725078907158707	0.105897990552445	0.731611685602461
111	lm	4	LOOCV	12	V2+V3+V4+V5+V6+V7+V8+V9+V10+V12+V13+V14	0.751948063355261	0.106662050930378	0.734034541572926	0	0	0.605442085592115	0.118853733285123	0.643319645375271	0.802072094873816	0.724936702728423	0.105950438734424	0.731472860287351
112	lm	4	repeatedcv	12	V2+V3+V4+V5+V6+V7+V8+V9+V10+V12+V13+V14	0.751948063355261	0.105102925728007	0.74478317582769	0.0185356824368684	0.096989152631617	0.605442085592115	0.118853733285123	0.643319645375271	0.802072094873816	0.724936702728423	0.105950438734424	0.731472860287351
113	svmRFE	3	repeatedcv	12	V5+V3+V6+V10+V9+V8+V12+V4+V14+V7+V13+V2	0.791713564646746	0.114114824941272	0.773992668036585	0.0104956723876163	0.083679599313922	0.676016182000068	0.116341190451565	0.707118628528062	0.840903459695619	0.768568714326764	0.106041070508935	0.774068071610088
114	rfRFE	3	repeatedcv	12	V7+V14+V2+V12+V9+V6+V8+V4+V13+V10+V3+V5	0.97510115117546	0.0765843874099036	0.864253765205582	0.0217708194312791	0.0725248798013823	0.831409522420128	0.0827412440315837	0.847594208267796	0.920648797461766	0.941566073511413	0.0508631810983807	0.942954602457676
115	rf	3	repeatedcv	12	V2+V3+V4+V5+V6+V7+V8+V9+V10+V12+V13+V14	0.97626229396407	0.0753584111516815	0.861718855434948	0.0219693190770905	0.0812611404712954	0.846747090734678	0.0785788446124743	0.86145937002415	0.928148355611402	0.946132645453693	0.048477401385108	0.947412661799348
116	nnet	3	LOOCV	12	V2+V3+V4+V5+V6+V7+V8+V9+V10+V12+V13+V14	0.939873655076355	0.0731139905299531	0.872669164404915	NA	NA	0.8137460057131	0.0850830410938555	0.831626389164642	0.911935518095793	0.911360331738403	0.0600932276361443	0.913466620885213
117	nnet	3	repeatedcv	12	V2+V3+V4+V5+V6+V7+V8+V9+V10+V12+V13+V14	0.941105956859339	0.0773695830055952	0.856036488003101	0.0205011708053456	0.0725745480236014	0.800941154557461	0.0881105615642346	0.820050803719945	0.905566565040884	0.909187055808535	0.060878967328324	0.911344987155659
118	svmRadial	3	LOOCV	12	V2+V3+V4+V5+V6+V7+V8+V9+V10+V12+V13+V14	0.954845258530653	0.0734371808917979	0.869717238273937	NA	NA	0.800159803049347	0.0881105306226984	0.81934446195661	0.905176481111065	0.919380099402974	0.0574460820943818	0.921295819813201
119	svmRadial	3	repeatedcv	12	V2+V3+V4+V5+V6+V7+V8+V9+V10+V12+V13+V14	0.954845258530653	0.0736708453672191	0.866080825878103	0.0174763157669435	0.0771310857815463	0.800159803049347	0.0881105306226984	0.81934446195661	0.905176481111065	0.919380099402974	0.0574460820943818	0.921295819813201
120	glmnet	3	LOOCV	12	V2+V3+V4+V5+V6+V7+V8+V9+V10+V12+V13+V14	0.741548462160779	0.107090080197463	0.722802214750621	NA	NA	0.642838436846763	0.117989198634199	0.677125946909474	0.82287662921575	0.724091190909887	0.106019782824373	0.730647439838761
121	glmnet	3	repeatedcv	12	V2+V3+V4+V5+V6+V7+V8+V9+V10+V12+V13+V14	0.741560634010671	0.105834150718609	0.737546310832927	0.0207939106577277	0.0899399525857939	0.64307394641943	0.117947797709916	0.677338847563165	0.823005982701927	0.72415219619516	0.106005878459266	0.730706995493493
122	lasso.RMSE	3	repeatedcv	12	V2+V3+V4+V5+V6+V7+V8+V9+V10+V12+V13+V14	0.740337477864793	0.106142801706926	0.735958128575348	0.0211824208891909	0.0923526691217176	0.639604741652519	0.118579415369145	0.674202686453877	0.821098463312335	0.722499629157976	0.106388181146507	0.729093697376004
123	pls	3	LOOCV	12	V2+V3+V4+V5+V6+V7+V8+V9+V10+V12+V13+V14	0.667860287094645	0.11899093005079	0.657687531838375	NA	NA	0.587083454193466	0.12717222914067	0.626723442590893	0.791658665455569	0.655956397660038	0.118390577214745	0.664131691180987
124	pls	3	repeatedcv	12	V2+V3+V4+V5+V6+V7+V8+V9+V10+V12+V13+V14	0.667860287094645	0.118273035742812	0.670752511116325	0.0179486379044427	0.0773954070670836	0.587083454193466	0.12717222914067	0.626723442590893	0.791658665455569	0.655956397660038	0.118390577214745	0.664131691180987
125	glmStepAIC	3	LOOCV	12	V2+V3+V4+V5+V6+V7+V8+V9+V10+V12+V13+V14	0.740652377269906	0.107414574493171	0.72136730173716	0	0	0.651643683623439	0.116554882771929	0.685085889995589	0.827699154279856	0.725436984582759	0.105748413055989	0.73196125425604
126	glmStepAIC	3	repeatedcv	12	V2+V3+V4+V5+V6+V7+V8+V9+V10+V12+V13+V14	0.740652377269906	0.107115997337508	0.731509635995991	0.020819495459026	0.0910053095681953	0.651643683623439	0.116554882771929	0.685085889995589	0.827699154279856	0.725436984582759	0.105748413055989	0.73196125425604
127	lm	3	LOOCV	12	V2+V3+V4+V5+V6+V7+V8+V9+V10+V12+V13+V14	0.741616713468893	0.107221663594936	0.722359027790099	0	0	0.644022870022149	0.117767044368656	0.678196674500023	0.823526972539468	0.724398920220652	0.105945517859414	0.730947856769865
128	lm	3	repeatedcv	12	V2+V3+V4+V5+V6+V7+V8+V9+V10+V12+V13+V14	0.741616713468893	0.105925641147384	0.737485298990645	0.0204868476401817	0.0884226506730904	0.644022870022149	0.117767044368656	0.678196674500023	0.823526972539468	0.724398920220652	0.105945517859414	0.730947856769865
129	svmRFE	2	repeatedcv	12	V10+V5+V4+V8+V7+V12+V6+V3+V14+V9+V13+V2	0.768811895405411	0.117442718525878	0.744482347215256	0.00812241462799491	0.0427784288366398	0.6946630916838	0.113551667968752	0.723975434882155	0.850867460232294	0.757605369672407	0.109212582633021	0.763365242076231
130	rfRFE	2	repeatedcv	12	V7+V14+V6+V9+V2+V12+V4+V8+V13+V10+V3+V5	0.976340018165659	0.0769453234387849	0.867586102489996	0.0196194354066851	0.0546075600246181	0.921535499982173	0.0568757623321153	0.929068091983885	0.963881783199519	0.964399351248034	0.0413731826598662	0.965245307257982
131	rf	2	repeatedcv	12	V2+V3+V4+V5+V6+V7+V8+V9+V10+V12+V13+V14	0.977573684871552	0.0774791119643956	0.861599946770713	0.0194019152566433	0.0614326670245596	0.923299497096917	0.054623171383923	0.930662745375614	0.964708632373326	0.96576289030841	0.0393645268525927	0.966576445390191
132	nnet	2	LOOCV	12	V2+V3+V4+V5+V6+V7+V8+V9+V10+V12+V13+V14	0.92338284284768	0.0851361993195121	0.833633400812322	NA	NA	0.830540216907348	0.079992557723814	0.846808356084242	0.920221905892401	0.903335206600322	0.0627388908044118	0.905632191790017
133	nnet	2	repeatedcv	12	V2+V3+V4+V5+V6+V7+V8+V9+V10+V12+V13+V14	0.925370280994739	0.0831486971731017	0.839969488833431	0.0188663232118612	0.0696683255146122	0.853983164237854	0.0753896496461221	0.86800078047102	0.93166559476618	0.909620418794752	0.0607748078684871	0.91176805240755
134	svmRadial	2	LOOCV	12	V2+V3+V4+V5+V6+V7+V8+V9+V10+V12+V13+V14	0.931554137062697	0.0793087174364513	0.850456154717838	NA	NA	0.829136795004161	0.0808954451143868	0.845539662683761	0.919532306492687	0.909571152270042	0.0611346593803949	0.911719956572536
135	svmRadial	2	repeatedcv	12	V2+V3+V4+V5+V6+V7+V8+V9+V10+V12+V13+V14	0.931554137062697	0.0783341624391992	0.848400518198887	0.0214399173810619	0.0841990439563079	0.829136795004161	0.0808954451143868	0.845539662683761	0.919532306492687	0.909571152270042	0.0611346593803949	0.911719956572536
136	glmnet	2	LOOCV	12	V2+V3+V4+V5+V6+V7+V8+V9+V10+V12+V13+V14	0.708784033288307	0.114531342019975	0.687547049359301	NA	NA	0.762303431457767	0.0950027613646005	0.785122302037821	0.886071273678264	0.726737522920956	0.105529053465175	0.733230888712933
137	glmnet	2	repeatedcv	12	V2+V3+V4+V5+V6+V7+V8+V9+V10+V12+V13+V14	0.708620850858433	0.111886970143077	0.710502202648047	0.0260266198327301	0.100675634960767	0.761826153791681	0.0950728540678387	0.78469084302768	0.885827772779607	0.726494804103486	0.105572545786543	0.732993937471324
138	lasso.RMSE	2	repeatedcv	12	V2+V3+V4+V5+V6+V7+V8+V9+V10+V12+V13+V14	0.707662525330575	0.111904255236293	0.709906140902638	0.0265117086997128	0.103305921578358	0.759437001654128	0.0954656683615965	0.782531049495332	0.884607850686015	0.725204646889029	0.105825072623163	0.731734437458002
139	pls	2	LOOCV	12	V2+V3+V4+V5+V6+V7+V8+V9+V10+V12+V13+V14	0.653634793172026	0.122635047377084	0.641704997652924	NA	NA	0.713072176022584	0.103636184485778	0.740617247124416	0.860591219525517	0.674819610176896	0.115090733446574	0.68254666894497
140	pls	2	repeatedcv	12	V2+V3+V4+V5+V6+V7+V8+V9+V10+V12+V13+V14	0.653634793172026	0.120536781731806	0.663746888469211	0.0252941763262298	0.0992312037405639	0.713072176022584	0.103636184485778	0.740617247124416	0.860591219525517	0.674819610176896	0.115090733446574	0.68254666894497
141	glmStepAIC	2	LOOCV	12	V2+V3+V4+V5+V6+V7+V8+V9+V10+V12+V13+V14	0.707612635737855	0.114844963138363	0.686103418103263	0	0	0.764743493825329	0.0946451703874287	0.787328118418097	0.88731511787983	0.726386760785183	0.105614861531121	0.732888461519
142	glmStepAIC	2	repeatedcv	12	V2+V3+V4+V5+V6+V7+V8+V9+V10+V12+V13+V14	0.707612635737855	0.112765709774145	0.705873594116182	0.0258302547868856	0.0998768576724083	0.764743493825329	0.0946451703874287	0.787328118418097	0.88731511787983	0.726386760785183	0.105614861531121	0.732888461519
143	lm	2	LOOCV	12	V2+V3+V4+V5+V6+V7+V8+V9+V10+V12+V13+V14	0.708864041092458	0.114755983828545	0.686685084681505	0	0	0.763233873205868	0.0948874779440404	0.785963421378105	0.886545780757037	0.727024539274847	0.105488107790305	0.733511084876237
144	lm	2	repeatedcv	12	V2+V3+V4+V5+V6+V7+V8+V9+V10+V12+V13+V14	0.708864041092458	0.11199336973179	0.70994382515735	0.0256253416528816	0.0985932549135209	0.763233873205868	0.0948874779440404	0.785963421378105	0.886545780757037	0.727024539274847	0.105488107790305	0.733511084876237
145	svmRFE	1	repeatedcv	12	V10+V8+V4+V5+V6+V3+V9+V7+V13+V12+V14+V2	0.807366811330728	0.118316672045736	0.781676841682845	0.0149670557980438	0.0661034805360765	0.713361173554145	0.125737347127097	0.740878500892947	0.860742993519522	0.788757667947526	0.113795422876696	0.79377728771907
146	rfRFE	1	repeatedcv	12	V7+V14+V6+V9+V12+V2+V8+V4+V13+V10+V3+V5	0.978401454959994	0.0708478257408186	0.889746315820299	0.0174842147527359	0.0373924139976148	0.848221452745613	0.0802328993679828	0.862792193282034	0.928866079304242	0.946494092227184	0.0488831098992086	0.947765519738617
147	rf	1	repeatedcv	12	V2+V3+V4+V5+V6+V7+V8+V9+V10+V12+V13+V14	0.979916759331846	0.0700159374245483	0.883105736723677	0.0151665337397633	0.0456331526297941	0.831975542697449	0.0831926023435293	0.848105890598493	0.920926647783901	0.943481870495855	0.0490967457666816	0.944824875553379
148	nnet	1	LOOCV	12	V2+V3+V4+V5+V6+V7+V8+V9+V10+V12+V13+V14	0.827759450012987	0.0870954220937128	0.813236229226865	NA	NA	0.711503698478749	0.109199099030497	0.739199343424789	0.85976702857506	0.802396760739042	0.0897473489434602	0.807092283256134
149	nnet	1	repeatedcv	12	V2+V3+V4+V5+V6+V7+V8+V9+V10+V12+V13+V14	0.920758990364073	0.0823027765292337	0.843475169166048	0.0229908700164573	0.0662204578914929	0.851441350714974	0.0800260166376876	0.865702981046336	0.930431610085522	0.903963271747233	0.0627248431202581	0.906245332616605
150	svmRadial	1	LOOCV	12	V2+V3+V4+V5+V6+V7+V8+V9+V10+V12+V13+V14	0.930923241711094	0.0782232790878534	0.849494459327148	NA	NA	0.85084960088457	0.0779017891358131	0.865168039199651	0.930144095933341	0.912498987470032	0.0598139247565841	0.914578219450942
151	svmRadial	1	repeatedcv	12	V2+V3+V4+V5+V6+V7+V8+V9+V10+V12+V13+V14	0.925124015476265	0.0775420588707133	0.846367646609968	0.0226905032964447	0.0789685439468142	0.837187632043728	0.0814402343560282	0.85281761936753	0.923481250144003	0.904762512836566	0.0623644498229113	0.907025581838469
152	glmnet	1	LOOCV	12	V2+V3+V4+V5+V6+V7+V8+V9+V10+V12+V13+V14	0.746038897403337	0.105146975137734	0.727708265199621	0	0	0.642204102871889	0.120735606116251	0.676552508996188	0.822528120489621	0.726618333107272	0.105490845526893	0.733114531132445
153	glmnet	1	repeatedcv	12	V2+V3+V4+V5+V6+V7+V8+V9+V10+V12+V13+V14	0.745960997242397	0.103409700366452	0.745502685902973	0.0189304822240265	0.0701619263966779	0.642561092232307	0.12066479944402	0.676875227378006	0.822724271781261	0.726662261274507	0.105484565507523	0.733157415462043
154	lasso.RMSE	1	repeatedcv	11	V2+V3+V4+V5+V6+V7+V9+V10+V12+V13+V14	0.745617051262682	0.103501934805097	0.745076624959326	0.0192197720111975	0.071649058524433	0.645972448322377	0.120608559040975	0.677126872870008	0.822877191851863	0.726583807807389	0.105641325543734	0.732539408033366
155	pls	1	LOOCV	12	V2+V3+V4+V5+V6+V7+V8+V9+V10+V12+V13+V14	0.668369168110611	0.117726320513647	0.658651624511028	NA	NA	0.604099436995098	0.126978423329953	0.642105891043569	0.801315100970629	0.660813379563857	0.117499028437262	0.668873259653428
156	pls	1	repeatedcv	12	V2+V3+V4+V5+V6+V7+V8+V9+V10+V12+V13+V14	0.668369168110611	0.115673102976235	0.676654537012401	0.0204263655139712	0.0917235172490473	0.604099436995098	0.126978423329953	0.642105891043569	0.801315100970629	0.660813379563857	0.117499028437262	0.668873259653428
157	glmStepAIC	1	LOOCV	12	V2+V3+V4+V5+V6+V7+V8+V9+V10+V12+V13+V14	0.745051206072358	0.105769435744763	0.724693798827959	0	0	0.641346793025489	0.120869648646957	0.675777500895042	0.822056872056333	0.725707523895968	0.10566477203344	0.732225364912302
158	glmStepAIC	1	repeatedcv	12	V2+V3+V4+V5+V6+V7+V8+V9+V10+V12+V13+V14	0.745051206072358	0.103840441795377	0.743721971444989	0.0185541377787682	0.0683877008158239	0.641346793025489	0.120869648646957	0.675777500895042	0.822056872056333	0.725707523895968	0.10566477203344	0.732225364912302
159	lm	1	LOOCV	12	V2+V3+V4+V5+V6+V7+V8+V9+V10+V12+V13+V14	0.746093657781587	0.105266570659143	0.72734517221	0	0	0.641241984760665	0.120919895387187	0.675682754223641	0.821999242228143	0.726401843728987	0.105533368973351	0.732903186056219
160	lm	1	repeatedcv	12	V2+V3+V4+V5+V6+V7+V8+V9+V10+V12+V13+V14	0.746093657781587	0.103459469351039	0.745706023852219	0.0184682254621486	0.0677403057212976	0.641241984760665	0.120919895387187	0.675682754223641	0.821999242228143	0.726401843728987	0.105533368973351	0.732903186056219
