# Supplementary material for: A methodology for the design of experiments in computational intelligence with multiple regression models
Source: PeerJ. 2016 Dec 1;4:e2721. doi: 10.7717/peerj.2721 (PMC5136129; doi:10.7717/peerj.2721)
Supplement: Data S1 — Datailed results from UC Irvine Machine Learning Repository (Housing, Machine CPU, Wine Quality, Automobile and Parkinson) and the 3 Use Cases (Protein Corona, Gajewicz Metal Oxides and Aquatic Toxicity) [file peerj-04-2721-s001.zip › 1_housing/RRegrsResBest.csv]

Averaged values for all spits:
RegrMeth	CVtype	adjR2.tr.Avg	RMSE.tr.Avg	R2.tr.Avg	RMSEsd.tr.Avg	R2sd.tr.Avg	adjR2.ts.Avg	RMSE.ts.Avg	R2.ts.Avg	corP.ts.Avg	adjR2.both.Avg	RMSE.both.Avg	R2.both.Avg	NoModelFeats.Avg
1	rf	repeatedcv	0.978027385983336	0.0737971925430299	0.869925307296546	0.0186959925575687	0.0686795503246	0.861105666011991	0.0739445665608392	0.87443952207484	0.934956031650578	0.950607156584168	0.0463462738206174	0.951780847912861	12
RRegr package | eNanoMapper
Regression method: rf
Split no.: 10
CV type: repeatedcv
Training Set Summary:
net.c	V2	V3	V4	V5	V6	V7	V8	V9	V10	V12	V13	V14
	Min. :0.0000	Min. :0.0000522	Min. :0.00000	Min. :0.0000	Min. :0.00000	Min. :0.0000	Min. :0.05787	Min. :0.0000	Min. :0.00000	Min. :0.0000	Min. :0.0000	Min. :0.0000	Min. :0.0000
	1st Qu.:0.2556	1st Qu.:0.0008680	1st Qu.:0.00000	1st Qu.:0.1899	1st Qu.:0.00000	1st Qu.:0.1399	1st Qu.:0.44525	1st Qu.:0.4392	1st Qu.:0.08802	1st Qu.:0.1304	1st Qu.:0.5106	1st Qu.:0.9440	1st Qu.:0.1501
	Median :0.3522	Median :0.0029188	Median :0.00000	Median :0.3422	Median :0.00000	Median :0.3086	Median :0.50536	Median :0.7817	Median :0.18120	Median :0.1739	Median :0.6862	Median :0.9860	Median :0.2748
	Mean :0.3846	Mean :0.0446532	Mean :0.10658	Mean :0.3962	Mean :0.07105	Mean :0.3511	Mean :0.52091	Mean :0.6831	Mean :0.23675	Mean :0.3824	Mean :0.6257	Mean :0.8957	Mean :0.3072
	3rd Qu.:0.4494	3rd Qu.:0.0425327	3rd Qu.:0.03125	3rd Qu.:0.6466	3rd Qu.:0.00000	3rd Qu.:0.4954	3rd Qu.:0.58804	3rd Qu.:0.9377	3rd Qu.:0.36145	3rd Qu.:1.0000	3rd Qu.:0.8085	3rd Qu.:0.9979	3rd Qu.:0.4276
	Max. :1.0000	Max. :1.0000000	Max. :1.00000	Max. :1.0000	Max. :1.00000	Max. :1.0000	Max. :0.98946	Max. :1.0000	Max. :1.00000	Max. :1.0000	Max. :0.9149	Max. :1.0000	Max. :0.9727
Test Set Summary:
net.c	V2	V3	V4	V5	V6	V7	V8	V9	V10	V12	V13	V14
	Min. :0.01333	Min. :0.000000	Min. :0.0000	Min. :0.02749	Min. :0.00000	Min. :0.02675	Min. :0.0000	Min. :0.03399	Min. :0.0006729	Min. :0.0000	Min. :0.04255	Min. :0.008019	Min. :0.005243
	1st Qu.:0.29944	1st Qu.:0.000712	1st Qu.:0.0000	1st Qu.:0.13022	1st Qu.:0.00000	1st Qu.:0.12500	1st Qu.:0.4467	1st Qu.:0.40499	1st Qu.:0.0886636	1st Qu.:0.1304	1st Qu.:0.43085	1st Qu.:0.948838	1st Qu.:0.136865
	Median :0.37222	Median :0.002534	Median :0.0000	Median :0.28922	Median :0.00000	Median :0.31481	Median :0.5103	Median :0.70185	Median :0.2222717	Median :0.1739	Median :0.68617	Median :0.987405	Median :0.242412
	Mean :0.40480	Mean :0.028152	Mean :0.1349	Mean :0.37695	Mean :0.06349	Mean :0.34341	Mean :0.5247	Mean :0.65609	Mean :0.2593545	Mean :0.3395	Mean :0.61457	Mean :0.907240	Mean :0.284070
	3rd Qu.:0.44333	3rd Qu.:0.031453	3rd Qu.:0.2000	3rd Qu.:0.64663	3rd Qu.:0.00000	3rd Qu.:0.46862	3rd Qu.:0.5799	3rd Qu.:0.94284	3rd Qu.:0.3949431	3rd Qu.:0.2609	3rd Qu.:0.80851	3rd Qu.:0.998506	3rd Qu.:0.365273
	Max. :1.00000	Max. :0.281441	Max. :0.9500	Max. :1.00000	Max. :1.00000	Max. :1.00000	Max. :1.0000	Max. :1.00000	Max. :0.8712183	Max. :1.0000	Max. :1.00000	Max. :1.000000	Max. :1.000000
Predictors:
x
1	V2
2	V3
3	V4
4	V5
5	V6
6	V7
7	V8
8	V9
9	V10
10	V12
11	V13
12	V14
Trainig Results:
x
1	NA
Test Results:
x
1	NA
Full Statistics:
RegrMeth	Split.No	CVtype	NoModelFeats	ModelFeats	adjR2.tr	RMSE.tr	R2.tr	RMSEsd.tr	R2sd.tr	adjR2.ts	RMSE.ts	R2.ts	corP.ts	adjR2.both	RMSE.both	R2.both
1	rf	10	repeatedcv	12	V2+V3+V4+V5+V6+V7+V8+V9+V10+V12+V13+V14	0.980463277660933	0.0718285347347866	0.87788430520198	0.0149026304181099	0.0560940660473397	0.849946232841448	0.0746709981910751	0.864351394488669	0.929705004013998	0.950991918829595	0.0452158544100024	0.95215646729305
V14
	x
1	7.70567136911845
V7
	x
1	5.08020126987346
V9
	x
1	0.987884677926408
V2
	x
1	0.804847409782173
V6
	x
1	0.342068368328135
V8
	x
1	0.246226631691298
V12
	x
1	0.201356655223201
V13
	x
1	0.146063797382458
V4
	x
1	0.140602455660446
V10
	x
1	0.0847552533908682
V3
	x
1	0.0185970880918793
V5
	x
1	0.0139786763879319
Residuals of the fitted model:
resids
2	0.0347546555901695
6	-0.100861261261261
7	-0.0552070257280181
8	-0.218039308825554
9	0.0494628008043069
10	0.0118566566566566
11	0.122568708284256
12	0.0414039057239057
13	-0.00219256623171216
15	0.025207435307247
17	-0.0462721298007805
18	0.0162875297315666
20	0.0255174659561871
22	-0.01895191682911
23	0.0165395378284266
25	0.0331769696969697
26	0.0453402567721989
28	0.0149078857455242
29	0.0426107142857143
31	0.0481172512900909
33	0.0555012301349823
34	0.0457148692810458
36	0.0621083750417084
37	0.0201992217358071
38	0.00879828532235938
39	-0.0745495859811284
40	-0.0402735368956745
41	0.00492854192482484
42	0.0630966061118152
43	-0.0262842559874362
44	-0.00833553483553479
45	0.019291598583878
46	0.00510582010582017
47	-0.000629488536155132
48	0.0797845243012529
50	0.00862313067784765
51	0.0105793372319688
52	0.0422620252310598
54	-0.065351475320052
56	-0.0364194958847738
57	-0.0277494160827494
58	-0.0061470217981846
59	0.0229181837204436
60	0.0252584684328456
63	0.0449843739610347
64	0.0277415666094911
65	-0.0637754458161865
67	0.0208635578583766
69	0.0440395845581031
70	-0.00301436130007554
71	-0.00712281822051936
72	-0.0117078644021554
73	0.000475402883799825
75	0.0031627200971463
76	0.0411174716756113
77	0.0256607495069034
78	0.0296333734456478
79	-0.00691195098444164
81	-0.0156310846560846
82	0.0568582660873164
84	0.000929207688701417
86	-0.00412740208790502
87	-0.0433101350447921
89	0.175079317066613
90	0.0447201141596939
91	0.0326397306397306
95	0.0221138058532306
96	-0.0373198529411765
98	0.117835383714119
99	-0.0520082378943134
100	0.00330961603805668
101	-0.0501817810457517
102	-0.0121288244766506
103	0.0113637136180156
105	-0.000301984126984178
106	0.00371187363834424
107	-0.024574494949495
108	-0.0139176185531325
110	-0.00280277777777782
111	-0.0102905729886192
112	0.0337536231884058
113	0.0167889019761811
115	0.0604634940868211
116	0.0154120454392686
118	0.0348120142827137
120	0.0260065483734686
121	-0.0348345592979739
122	0.00624488386691779
125	-0.0191059463132856
126	-0.0727534188034187
127	-0.0216835511982568
128	0.00400154858691432
129	-0.0155416418207114
130	0.0329653021442497
132	0.0100273321449791
134	-0.0157387811091515
135	-0.000377412147064632
136	-0.0183255718954248
137	-0.0175303093355526
138	0.0393072774528915
139	0.0435131884652178
140	-0.0637834446468326
141	0.0254950939745718
142	-0.0225456349206345
143	0.0165649143767429
145	0.0768252818035426
146	0.0139691592733419
147	0.0283363309352519
149	-0.0948829951108431
150	-0.0213409306742639
151	-0.0441427329856932
152	-0.00973531746031731
153	0.1161275496511
154	-0.068901818181818
155	0.0252942533280613
158	-0.20519306963493
161	0.100554757630161
162	-0.15504169196519
164	-0.0991253767329723
165	-0.0533564143853998
168	-0.0949460260972716
170	-0.0361036769138035
171	0.0764707727985814
172	0.0531226895445351
174	0.0217826617826617
175	-0.025740874207541
176	-0.0407414421997756
177	-0.0189458955223881
178	-0.016733850129199
179	-0.0265597316355169
180	-0.130574834275984
182	-0.267945338898827
183	-0.108653899860363
185	-0.0940508677438659
186	-0.134725132275132
189	-0.00998082869511452
190	-0.0204312830687827
191	-0.144914212201232
192	-0.0321687631027254
195	0.015107919409535
196	-0.0808648989898999
197	0.0407642463555833
198	0.0436327913279134
199	-0.0413495412229589
200	-0.0343169590643277
202	-0.0106504465458366
204	-0.0255664767331456
205	-0.0673508806008811
206	-0.0122773471145565
207	-0.0426994352508536
208	-0.0799646587979921
209	-0.0722908615136875
210	-0.0172353049566978
211	-0.0411873479318735
212	0.00974074074074072
214	-0.0940153133903134
215	-0.116870100027034
216	0.00692036689597675
217	-0.0404606223323696
218	-0.111018551294657
219	-0.044652386541471
220	-0.039062962962963
221	0.035795019157088
222	-0.0650463127425828
223	-0.0373398611970042
224	-0.0871985903814262
225	-0.01108962962963
226	-0.154680676931613
227	0.192918531491209
228	0.00261758061203499
229	-0.0476098436839878
230	-0.0335861545138891
231	-0.0548167676767677
232	0.0340324816795401
233	0.111446265938068
234	-0.0779591743418904
235	-0.0545735246590393
236	-0.0311898063200816
237	0.0584994746519569
238	0.0456480056980056
239	0.0373599763173476
241	0.110398700939746
242	0.016498297547078
244	0.0302528093623246
245	0.0231521911775322
246	0.0237199391171994
248	-0.0125983690112131
249	-0.0161121456652183
250	-0.0040954850721458
251	0.0202788941423694
253	0.0837991769547327
254	-0.0172751322751322
255	0.00162689626896273
256	-0.0186016520117239
257	-0.0659515669515673
258	-0.0926727023319629
259	-0.00963338800054703
260	0.0323179529622731
261	-0.0499007512850926
262	-0.056891866376181
263	-0.112067844810077
264	-0.071252850300209
269	0.0565012254901939
270	0.0233527107812823
272	-0.0213664935964002
273	0.013945054945055
274	0.133937372541281
275	-0.0323586081355458
276	0.00478943278943289
277	0.0100950396825398
278	-0.0395598089255335
279	-0.114886301742919
281	0.0303956722290042
282	-0.0511389408099687
286	0.0188438906195916
287	0.0689331622919544
288	-0.0017464674758792
289	0.017058799675588
290	0.0202276438696192
291	0.0968127021852512
292	-0.0966454926624735
293	0.00403093355527817
294	-0.0388041711614527
296	-0.0490419430624656
297	-0.0267503690865911
299	0.0799657339821573
300	0.121089270442734
304	0.0034502354588265
306	-0.0382275837742504
307	8.81520952569215e-05
308	0.0182877757163471
309	0.168437010002703
311	0.0999626174682144
312	0.0451010648985333
313	0.0213261520047876
314	0.0152283722837228
315	0.0308367748279253
317	0.0143277844631635
318	-0.00145496788301214
319	-0.0217919180125836
321	-0.00397740112994355
322	0.015726997031875
323	0.0277564831145078
324	0.022718317931084
326	0.0139819994819995
328	-0.0241262254901961
329	0.0663145145145145
330	0.036313911472448
332	0.0540296677466489
333	0.0296565534793384
334	0.0124287144287145
335	0.0411784149741139
336	-0.0142767233425596
338	0.0393659673659674
339	0.00816711991711994
340	0.0405756172839506
342	0.0149020715630883
343	0.203598280654127
344	0.0791599628302137
346	0.0556394474913671
347	0.0452392228293868
349	0.0672215016572992
353	0.0866900831991411
354	-0.0338711783336568
357	-0.0651045356951154
358	-0.0231409003258195
359	-0.0603825989177033
362	0.0108069663358631
363	-0.0142288930581614
367	-0.0725891305767848
368	-0.105701067615658
369	-0.376490286512929
371	-0.225993705691382
372	-0.237522749462998
373	-0.283248395061731
374	-0.0558038214893339
376	0.300879121599475
377	-0.0551280276816613
379	-0.0503919641663331
380	0.0380759292387195
381	0.150782154882155
382	0.0103223188405797
383	0.00252496282133008
384	-0.0340637117261663
385	-0.0238350938967137
386	0.0330204365079365
387	-0.060844768265534
388	0.0285996597304015
390	-0.00310304158907498
391	-0.0231433647669809
393	0.00542369785959501
394	0.0103542413381122
395	-0.01788997223915
397	0.0475467854010662
398	0.10304061908624
399	0.0660368389780149
400	0.0950279790660219
402	0.0725399545482459
403	-0.0386644029428414
404	0.0762470019214202
405	-0.0110815939278941
406	0.097911234112341
407	0.0423028641072517
408	-0.0597515574724445
411	0.208144527986633
413	-0.139069330734243
414	-0.0874709098862643
415	0.0457030504931738
417	0.0619249692496928
418	-0.044103320561941
419	-0.0170795286195288
420	0.0597495378338754
421	-0.0354734076637191
422	0.0190296713223544
423	-0.0512828770799785
424	-0.00089187686748643
425	0.0713443891652846
426	0.0305300677021111
427	0.0951651880016899
428	0.115887962962963
430	0.0536491846323936
431	-0.0143508958289075
432	0.0289146253837609
433	0.107931507748884
434	0.0322695256660169
435	0.0526264822134385
438	0.0186106051406598
439	0.0102635813551437
440	-0.0303213584609343
441	-0.0159479385045422
442	-0.0848155100492983
444	-0.0126024305555555
445	-0.0219545088566829
446	-0.032746571258199
447	-0.00477460883343228
448	0.0668338733244392
449	0.028295066045066
451	0.0304535161312325
452	0.0179553001277137
453	-0.00471464346909167
454	0.0258655568926326
455	-0.0206199588477368
456	0.0256680384087791
457	0.0690860931478216
459	0.0284659013256801
461	-0.015667783031258
462	0.030833468013468
463	0.0117433498790887
465	-0.02034438811435
466	0.0169762340036564
467	-0.0848934086629005
468	-0.108795520474938
469	-0.134355655079264
471	-0.054661043242195
472	0.0245148415563578
473	-0.0786703903185053
474	-0.151959007551241
475	0.0253640420996535
476	0.0336500936734397
477	-0.0291243231535628
478	0.0383107947805458
479	-0.00434760051880675
482	0.143591732804233
483	0.176199475581776
484	-0.0335322076297686
485	0.0177429718875502
487	-0.0444805280528051
490	0.189232219538379
492	0.0613443713012835
493	0.00312848067045146
495	-0.0839772758106092
496	-0.0867196040868455
497	-0.0362427550357375
498	0.0568484848484848
500	0.0436076701701703
502	0.0511860254670027
503	-0.0357618076792391
504	0.121732089753988
505	0.0818863079106982
506	0.239409345794393
Leverage output:
Mean of hat values: 0.0348841378386599
Leverage / Hat values with warnings (X3 & X2 = values 3 & 2 times than hat mean):
hat.fit	warn
1	0.0181374728760378	-
3	0.016234756884021	-
4	0.0229668014753754	-
5	0.0245083377392636	-
14	0.0209672273202491	-
16	0.0209937246772703	-
19	0.0305273518538337	-
21	0.0258317779764882	-
24	0.02403860417269	-
27	0.0219015933083024	-
30	0.0176428287184335	-
32	0.0267790737707439	-
35	0.0318993301780697	-
49	0.0675020964126822	-
53	0.0152849900678001	-
55	0.0519738081334005	-
61	0.0229084159624142	-
62	0.0354943081614284	-
66	0.0337945280024628	-
68	0.0149948673843175	-
74	0.031116269373235	-
80	0.0168745421880799	-
83	0.00895056952496973	-
85	0.0098003057902497	-
88	0.00923208542100878	-
92	0.0148871982325775	-
93	0.0221866704875873	-
94	0.026706631852523	-
97	0.0148818160899942	-
104	0.0174306752567447	-
109	0.0230346490561804	-
114	0.0142255847314685	-
117	0.00620069168977244	-
119	0.00676020881905988	-
123	0.0423847582521693	-
124	0.0515856605458855	-
131	0.030082996128126	-
133	0.0312718760772552	-
144	0.0642947131018886	-
148	0.0770166906444166	x2
156	0.117884691604475	x3
157	0.0819101463592355	x2
159	0.0424370886783075	-
160	0.0747764664335988	x2
163	0.0845396085281601	x2
166	0.0369405102094982	-
167	0.067431607884075	-
169	0.0341132895410378	-
173	0.0241094047578375	-
181	0.0316776144288366	-
184	0.0299509991789199	-
187	0.0470344791022988	-
188	0.0197948143714687	-
193	0.0161216432637995	-
194	0.0216302600705415	-
201	0.0445178481374846	-
203	0.0404778531038824	-
213	0.0482134859208354	-
240	0.0104567355185765	-
243	0.0152618750282878	-
247	0.0214310398699246	-
252	0.0240343731693766	-
265	0.0405769816967479	-
266	0.0361501155678164	-
267	0.0432490336850313	-
268	0.0573809782221657	-
271	0.00926070995228281	-
280	0.0168780378223798	-
283	0.0572988031638555	-
284	0.0903062690043631	x2
285	0.0397602971294053	-
295	0.0335034266896027	-
298	0.044049998381979	-
301	0.0333203424417748	-
302	0.0150976963433722	-
303	0.0160572148781642	-
305	0.0218653249102921	-
310	0.00796280556126192	-
316	0.0104550345389154	-
320	0.00680393526691921	-
325	0.0127741566200044	-
327	0.0182920225164489	-
331	0.0166127498345994	-
337	0.018387763718105	-
341	0.0162159210692408	-
345	0.0190603263569742	-
348	0.0401594925553713	-
350	0.0288998609099083	-
351	0.0325375546801346	-
352	0.0472105431057168	-
355	0.0851162751215565	x2
356	0.084912613792354	x2
360	0.0323270609899468	-
361	0.0402384840086543	-
364	0.063030501595788	-
365	0.130554548896023	x3
366	0.145495203213542	x3
370	0.10129377296307	x2
375	0.0847183738693223	x2
378	0.0292256757553245	-
389	0.0315410889797971	-
392	0.0187101967769363	-
396	0.022174082764892	-
401	0.0329234874128072	-
409	0.0321135110216441	-
410	0.0339236387099519	-
412	0.0459077445563354	-
416	0.0516149942543748	-
429	0.0291162870657449	-
436	0.0329636069475682	-
437	0.0425049726306424	-
443	0.0188262192378048	-
450	0.0160950677901277	-
458	0.0451637535373269	-
460	0.0191094184626795	-
464	0.0257332853070104	-
470	0.0251804410420912	-
480	0.018233743427528	-
481	0.0300423010722831	-
486	0.0291851267240786	-
488	0.0271340296260693	-
489	0.046063698747895	-
491	0.0583237040240247	-
494	0.0155167932444643	-
499	0.011179021229577	-
501	0.0110289227501433	-
Leverage Threshold: 0.0947368421052632
Points with leverage > threshold:
hat.fit.hat.fit...thresh.lever.
156	0.117884691604475
365	0.130554548896023
366	0.145495203213542
370	0.10129377296307
