# Supplementary material for: A methodology for the design of experiments in computational intelligence with multiple regression models
Source: PeerJ. 2016 Dec 1;4:e2721. doi: 10.7717/peerj.2721 (PMC5136129; doi:10.7717/peerj.2721)
Supplement: Data S1 — Datailed results from UC Irvine Machine Learning Repository (Housing, Machine CPU, Wine Quality, Automobile and Parkinson) and the 3 Use Cases (Protein Corona, Gajewicz Metal Oxides and Aquatic Toxicity) [file peerj-04-2721-s001.zip › 1_housing/RRegsResAvgs.csv]

	RegrMeth	CVtype	adjR2.tr.Avg	RMSE.tr.Avg	R2.tr.Avg	RMSEsd.tr.Avg	R2sd.tr.Avg	adjR2.ts.Avg	RMSE.ts.Avg	R2.ts.Avg	corP.ts.Avg	adjR2.both.Avg	RMSE.both.Avg	R2.both.Avg	NoModelFeats.Avg
1	rfRFE	repeatedcv	0.976633454566169	0.0743530698301792	0.870357780292198	0.0204200476403883	0.0690097077027469	0.863400141145492	0.0743026477511996	0.876513727595524	0.936068056815849	0.950057654896498	0.0473892858325765	0.951244403691036	12
2	rf	repeatedcv	0.978027385983336	0.0737971925430299	0.869925307296546	0.0186959925575687	0.0686795503246	0.861105666011991	0.0739445665608392	0.87443952207484	0.934956031650578	0.950607156584168	0.0463462738206174	0.951780847912861	12
3	svmRadial	repeatedcv	0.937464492721961	0.0775130054298341	0.852504782824986	0.0205541111333151	0.0767499395997298	0.827887587143565	0.0806428299813968	0.844410378777782	0.918678787864872	0.912989107142619	0.0596768820459659	0.915056692715467	12
4	nnet	repeatedcv	0.927668545615677	0.0785830824771547	0.853473968779753	0.0193463956263581	0.069541597902722	0.817405294154947	0.0833293518884058	0.834934385916072	0.913448229198589	0.903112468585864	0.0627040901139243	0.905414746560061	12
5	svmRFE	repeatedcv	0.778005452678424	0.118838492738548	0.751942437512914	0.0173885791930767	0.0815603522625492	0.699857973450237	0.117450079036288	0.727757417310437	0.852847005736715	0.764028871632745	0.111274166564815	0.769386467953085	11.6
6	glmStepAIC	repeatedcv	0.733282301440801	0.107231955942924	0.73069104565639	0.0220698054089686	0.0930342842408081	0.678293310523527	0.110906417937872	0.709177152713268	0.841609414622601	0.725532994104771	0.105747093398771	0.732054982363667	12
7	lm	repeatedcv	0.734053319713574	0.106735029887531	0.733370585963596	0.0219017999357072	0.0917307404376153	0.676390621424408	0.11126257402115	0.707457121767665	0.840555265816939	0.725588809340632	0.105739945644016	0.732109471296894	12
8	glmnet	repeatedcv	0.733820417206714	0.106668358901152	0.733361170412032	0.0224264452082504	0.0946255684555736	0.675099274007666	0.111448902472941	0.706067563204824	0.839715354738197	0.725042896926423	0.105848636466427	0.731522280931332	11.9
9	lasso.RMSE	repeatedcv	0.733170444918699	0.106755974810559	0.732880283029207	0.0226129602222864	0.0959109541900014	0.67415509827886	0.111728157017735	0.704479697769381	0.838757832203401	0.724160011718273	0.106064712595161	0.730497723041796	11.6
10	pls	repeatedcv	0.665238487282612	0.117773448559269	0.673641056187763	0.0221380637373317	0.0989036989703028	0.62425278262585	0.119645317872831	0.660324515493768	0.811847848670286	0.662767508790954	0.11719611006501	0.670780954126614	12
