# Supplementary material for: A methodology for the design of experiments in computational intelligence with multiple regression models
Source: PeerJ. 2016 Dec 1;4:e2721. doi: 10.7717/peerj.2721 (PMC5136129; doi:10.7717/peerj.2721)
Supplement: Data S1 — Datailed results from UC Irvine Machine Learning Repository (Housing, Machine CPU, Wine Quality, Automobile and Parkinson) and the 3 Use Cases (Protein Corona, Gajewicz Metal Oxides and Aquatic Toxicity) [file peerj-04-2721-s001.zip › 2_machineCPU/RRegrsResAllSplits.csv]

	RegrMeth	Split.No	CVtype	NoModelFeats	ModelFeats	adjR2.tr	RMSE.tr	R2.tr	RMSEsd.tr	R2sd.tr	adjR2.ts	RMSE.ts	R2.ts	corP.ts	adjR2.both	RMSE.both	R2.both
1	svmRFE	10	repeatedcv	2	V3+V6	0.745734148014487	0.128879629893047	0.72841228617925	0.0357325820601182	0.164032780268216	0.415662512196535	0.135215005465574	0.438577707796671	0.662251997200968	0.684786075821622	0.127305045721341	0.687816978938722
2	rfRFE	10	repeatedcv	6	V4+V5+V3+V6+V2+V7	0.962270898526043	0.0458758265443478	0.943148230552097	0.0460341637165189	0.0475601062616781	0.878062278295539	0.0423399677029987	0.89240789261371	0.944673431728505	0.948316523335519	0.0344369157419708	0.949807392854687
3	rf	10	repeatedcv	6	V2+V3+V4+V5+V6+V7	0.963772602038713	0.0471391828344435	0.927429771656265	0.0449155779079654	0.05924371664633	0.898074010910924	0.0389580408458295	0.910065303744933	0.953973429265686	0.953031197157297	0.0332729923757148	0.954386066470067
4	nnet	10	LOOCV	6	V2+V3+V4+V5+V6+V7	0.97937962677929	0.0505688808380494	0.879039454400121	NA	NA	0.870939871491046	0.0576474362735646	0.886123416021512	0.941341285624673	0.945873628151647	0.0337751374515057	0.947434965801118
5	nnet	10	repeatedcv	6	V2+V3+V4+V5+V6+V7	0.974606099567174	0.0433459898217447	0.922433968371538	0.0303603829321417	0.0621597857141154	0.866280249363205	0.052260487032758	0.882011984732239	0.939154931165375	0.946971773932956	0.0326542230414791	0.948501434300275
6	svmRadial	10	LOOCV	6	V2+V3+V4+V5+V6+V7	0.986086555685102	0.0928750387828791	0.619426256908032	NA	NA	0.871581568409665	0.0490176231982779	0.886689619184999	0.941641980364618	0.958879477387596	0.0286700932055653	0.960065646309107
7	svmRadial	10	repeatedcv	6	V2+V3+V4+V5+V6+V7	0.986086555685102	0.0688454154871101	0.829623179016338	0.0651239420239186	0.142692877674316	0.871581568409665	0.0490176231982779	0.886689619184999	0.941641980364618	0.958879477387596	0.0286700932055653	0.960065646309107
8	glmnet	10	LOOCV	6	V2+V3+V4+V5+V6+V7	0.886009749882794	0.0658624453264115	0.794251189452083	NA	NA	0.715746472477673	0.0641292805710097	0.749188063950888	0.865556505348373	0.855275469251917	0.0526072052453887	0.859450215331188
9	glmnet	10	repeatedcv	6	V2+V3+V4+V5+V6+V7	0.883046957440615	0.0556393977849424	0.872762840030701	0.0361944619206575	0.0916763410844701	0.702450585966359	0.0649473863571269	0.737456399382081	0.858752816229491	0.84980408602072	0.0537514373178469	0.85413666046243
10	lasso.RMSE	10	repeatedcv	5	V2+V3+V4+V5+V7	0.885245032236499	0.0566957789631295	0.86648893487756	0.0385702171734492	0.100926908685178	0.724012678680141	0.063262773453495	0.751070259201695	0.866643097936916	0.855691033478673	0.0526603514089818	0.859159999020051
11	pls	10	LOOCV	6	V2+V3+V4+V5+V6+V7	0.83481621202432	0.0644720684851881	0.80300468188511	0	0	0.652703619848992	0.0739422624029138	0.693562017513817	0.832803708873716	0.799518587542522	0.0622499700327915	0.805301705209565
12	pls	10	repeatedcv	6	V2+V3+V4+V5+V6+V7	0.83481621202432	0.0577372603398869	0.871279693485029	0.0280844306999139	0.058615096350496	0.652703619848992	0.0739422624029138	0.693562017513817	0.832803708873716	0.799518587542522	0.0622499700327915	0.805301705209565
13	glmStepAIC	10	LOOCV	6	V2+V3+V4+V5+V6+V7	0.886586144227916	0.0675522466290782	0.783717973035419	0	0	0.718052256024272	0.0646633781486889	0.751222578844946	0.866730972588926	0.856180402756423	0.0526016420032454	0.860329044984603
14	glmStepAIC	10	repeatedcv	6	V2+V3+V4+V5+V6+V7	0.886586144227916	0.057135144405468	0.862715110101495	0.0367811713368293	0.104500093521829	0.718052256024272	0.0646633781486889	0.751222578844946	0.866730972588926	0.856180402756423	0.0526016420032454	0.860329044984603
15	lm	10	LOOCV	6	V2+V3+V4+V5+V6+V7	0.88659722416592	0.0670783221358879	0.786822040702007	0	0	0.718155095725038	0.0646827280240722	0.751313319757387	0.866783317650603	0.85616892662575	0.0526059576093402	0.860317899896161
16	lm	10	repeatedcv	6	V2+V3+V4+V5+V6+V7	0.88659722416592	0.0574064597445675	0.862929187505068	0.0352441086402136	0.104274294016819	0.718155095725038	0.0646827280240722	0.751313319757387	0.866783317650603	0.85616892662575	0.0526059576093402	0.860317899896161
17	svmRFE	9	repeatedcv	2	V3+V7	0.879487951093474	0.126741958698821	0.755243426976788	0.0180401654811759	0.18051471525964	0.864613584352132	0.119265579238496	0.869922855554009	0.932696550628343	0.862450308755764	0.113121146297575	0.863772901940805
18	rfRFE	9	repeatedcv	6	V4+V6+V5+V3+V2+V7	0.975296608276462	0.0463720921742603	0.895010528475827	0.0308050460479985	0.0944070130344388	0.947860216804765	0.0265117402258162	0.953994308945381	0.976726322439086	0.968008057833824	0.0266878346711448	0.968930902319387
19	rf	9	repeatedcv	6	V2+V3+V4+V5+V6+V7	0.978093663516875	0.0451248486111835	0.895668070753774	0.0278391724986261	0.0876127182639104	0.916471414745843	0.0347047219967868	0.926298307128685	0.962443924147628	0.96281084790589	0.0273632229320517	0.963883611908605
20	nnet	9	LOOCV	6	V2+V3+V4+V5+V6+V7	0.96058432657885	0.0417824749148387	0.919521231217511	NA	NA	0.949209881899971	0.0265357951266827	0.955185189911739	0.977335761093259	0.958845410722277	0.028126089620772	0.960032562336057
21	nnet	9	repeatedcv	6	V2+V3+V4+V5+V6+V7	0.966433263513764	0.0426448968794486	0.878945268253452	0.0182211824005715	0.115493010255768	0.946139313741131	0.0255836274677561	0.952475865065704	0.975948700017426	0.964015013347943	0.0262347290067385	0.96505304180906
22	svmRadial	9	LOOCV	6	V2+V3+V4+V5+V6+V7	0.987093705503602	0.0785001348234996	0.720024511859163	NA	NA	0.786278017027528	0.0564791516276619	0.811421779730172	0.900789531316929	0.94911779429638	0.0316383325812107	0.950585550230138
23	svmRadial	9	repeatedcv	6	V2+V3+V4+V5+V6+V7	0.987184506403056	0.0619245575728285	0.810253949465997	0.0541379723829735	0.15768090687873	0.788747747055311	0.056246100611929	0.813600953284098	0.901998311131511	0.949519924598197	0.0314878285646327	0.950976080619403
24	glmnet	9	LOOCV	6	V2+V3+V4+V5+V6+V7	0.845869992677801	0.0694138965932408	0.777598385115625	NA	NA	0.929676777071436	0.0328831399245855	0.937950097415973	0.968478237967159	0.860433871949415	0.0517263720263305	0.864459817950875
25	glmnet	9	repeatedcv	6	V2+V3+V4+V5+V6+V7	0.845332126579737	0.0628301036789353	0.810018250345682	0.0302815426904127	0.160876616944066	0.927523796641086	0.0325456944218258	0.936050408800958	0.967496981287775	0.859309761337779	0.0518605556108227	0.863368133606881
26	lasso.RMSE	9	repeatedcv	6	V2+V3+V4+V5+V6+V7	0.843544100393783	0.0632346510951649	0.805711512531376	0.0299399454553738	0.166996429485791	0.927978350661324	0.031446935225061	0.936451485877638	0.967704234711019	0.858424466168638	0.052058083089319	0.862508375798389
27	pls	9	LOOCV	6	V2+V3+V4+V5+V6+V7	0.787164568624127	0.0734397592559725	0.750764327444428	0	0	0.841596048508225	0.0490301220218815	0.860231807507257	0.927486823360449	0.796284082905222	0.0626161298755746	0.802160503590648
28	pls	9	repeatedcv	6	V2+V3+V4+V5+V6+V7	0.787164568624127	0.067665976947437	0.80408762396357	0.0285869793197826	0.111871908729615	0.841596048508225	0.0490301220218815	0.860231807507257	0.927486823360449	0.796284082905222	0.0626161298755746	0.802160503590648
29	glmStepAIC	9	LOOCV	6	V2+V3+V4+V5+V6+V7	0.845827465447724	0.0690573732763073	0.779368496119522	0	0	0.930660811942534	0.0326580319118426	0.938818363478707	0.968926397348481	0.86077667786527	0.051693480088056	0.864792735234541
30	glmStepAIC	9	repeatedcv	6	V2+V3+V4+V5+V6+V7	0.845827465447724	0.0630353796737225	0.803156333471948	0.0277200526106243	0.169703450931181	0.930660811942534	0.0326580319118426	0.938818363478707	0.968926397348481	0.86077667786527	0.051693480088056	0.864792735234541
31	lm	9	LOOCV	6	V2+V3+V4+V5+V6+V7	0.845889716652343	0.0695758540980189	0.776053179898439	0	0	0.929917697291256	0.0330550743781217	0.93816267408052	0.968587979525102	0.86054194111937	0.0517468411312682	0.864564769740927
32	lm	9	repeatedcv	6	V2+V3+V4+V5+V6+V7	0.845889716652343	0.0635574402224702	0.803295607418317	0.0277328752356778	0.170481268534554	0.929917697291256	0.0330550743781217	0.93816267408052	0.968587979525102	0.86054194111937	0.0517468411312682	0.864564769740927
33	svmRFE	8	repeatedcv	6	V7+V5+V3+V6+V4+V2	0.920265690970166	0.110799071328406	0.836913066176009	0.01286863363951	0.138136145254656	0.652057581865407	0.139033484788597	0.692991983998889	0.832461400906306	0.814353173461374	0.114488564850369	0.819708370380757
34	rfRFE	8	repeatedcv	6	V5+V4+V6+V3+V2+V7	0.967534196342431	0.0401555502657994	0.934447690336973	0.0289787178893462	0.068461631347583	0.941075316007088	0.0610298626586465	0.94800763177096	0.973656834706644	0.945347267733393	0.0380777849006174	0.946923788856468
35	rf	8	repeatedcv	6	V2+V3+V4+V5+V6+V7	0.968721623771299	0.04111631259338	0.909684989779081	0.0268903470713261	0.0825160002695279	0.931113553798264	0.0621541206064582	0.939217841586704	0.969132520136799	0.943979765338904	0.0383489785354764	0.945595733646436
36	nnet	8	LOOCV	6	V2+V3+V4+V5+V6+V7	0.942421612934745	0.047874138024322	0.873059190106862	NA	NA	0.971490823547626	0.0278227889036308	0.974844844306729	0.987342313641388	0.951526214027328	0.0305757564924501	0.952924496315001
37	nnet	8	repeatedcv	6	V2+V3+V4+V5+V6+V7	0.953149544869049	0.044764935183149	0.865643113378652	0.0163391969372234	0.128814958116829	0.98651019543285	0.0291178118707964	0.988097231264279	0.994030799957566	0.959787276177126	0.0285622202936128	0.960947258595094
38	svmRadial	8	LOOCV	6	V2+V3+V4+V5+V6+V7	0.982459751941779	0.0530115556764754	0.845889656179154	NA	NA	0.568522831907059	0.113281137560891	0.619284851682699	0.786946536737216	0.82713223556733	0.0584870911302429	0.832118805695195
39	svmRadial	8	repeatedcv	6	V2+V3+V4+V5+V6+V7	0.977915209938415	0.0495664291933613	0.825346786718563	0.0224518880228801	0.134030268439741	0.575660406015356	0.113055711365762	0.62558271119002	0.790937868097122	0.827769964656196	0.0590843528033908	0.832738138752652
40	glmnet	8	LOOCV	5	V2+V3+V4+V5+V7	0.822179086409239	0.0656182353420005	0.758611458441809	NA	NA	0.92928569001621	0.0451416126164355	0.936218465504816	0.967583828670579	0.855834373321244	0.0530831059311509	0.859299893193329
41	glmnet	8	repeatedcv	6	V2+V3+V4+V5+V6+V7	0.821614193502298	0.0600215371605704	0.800145062034816	0.0255961726794959	0.14966140748921	0.929554021226868	0.0437043570526715	0.937841783435472	0.96842231667567	0.856285704519741	0.0526676352403326	0.860431309197056
42	lasso.RMSE	8	repeatedcv	5	V2+V3+V4+V5+V7	0.821497737107819	0.0600928933213897	0.800919959076373	0.0262182577393	0.147490590763059	0.927566437735165	0.0462140012765947	0.934667767368973	0.96678217162346	0.854733124101741	0.0534402260995992	0.858225116310834
43	pls	8	LOOCV	6	V2+V3+V4+V5+V6+V7	0.764017455054388	0.0695056669259252	0.729272915142936	0	0	0.841414625108471	0.0649544629536727	0.860071728036886	0.927400521908893	0.788119141083776	0.0639530323729107	0.794231088937128
44	pls	8	repeatedcv	6	V2+V3+V4+V5+V6+V7	0.764017455054388	0.0638667536571275	0.800958137144161	0.0261708138584258	0.108642341250327	0.841414625108471	0.0649544629536727	0.860071728036886	0.927400521908893	0.788119141083776	0.0639530323729107	0.794231088937128
45	glmStepAIC	8	LOOCV	6	V2+V3+V4+V5+V6+V7	0.821581505891032	0.0649029184458454	0.764046500899563	0	0	0.930221526681361	0.0431223798264199	0.938430758836495	0.968726359111021	0.856559182503984	0.052548113416068	0.860696898393292
46	glmStepAIC	8	repeatedcv	6	V2+V3+V4+V5+V6+V7	0.821581505891032	0.0594860723736455	0.802068266951089	0.024526217096907	0.150225354181551	0.930221526681361	0.0431223798264199	0.938430758836495	0.968726359111021	0.856559182503984	0.052548113416068	0.860696898393292
47	lm	8	LOOCV	6	V2+V3+V4+V5+V6+V7	0.821774539086913	0.066590978962692	0.751854154739583	0	0	0.9301220663382	0.0431523932836577	0.938342999710177	0.96868106191366	0.856656915664153	0.0525305772480933	0.860791812327688
48	lm	8	repeatedcv	6	V2+V3+V4+V5+V6+V7	0.821774539086913	0.0605820492592941	0.796420192464675	0.0249149889262535	0.152423788694681	0.9301220663382	0.0431523932836577	0.938342999710177	0.96868106191366	0.856656915664153	0.0525305772480933	0.860791812327688
49	svmRFE	7	repeatedcv	2	V3+V7	0.888358086449342	0.130450377180788	0.716194452053718	0.0317696846558685	0.156951650821981	0.653119188070566	0.117746620352901	0.666722357165839	0.816530683542167	0.857002252774316	0.111317173788438	0.858377231113025
50	rfRFE	7	repeatedcv	6	V4+V3+V5+V6+V2+V7	0.969736387902536	0.0442811109598737	0.923955560263474	0.0327049699203255	0.0596021543494521	0.898280281189769	0.0327948690224234	0.910247306932149	0.954068816664788	0.95728513168408	0.0302411502164742	0.958517291347039
51	rf	7	repeatedcv	6	V2+V3+V4+V5+V6+V7	0.971646068414026	0.0455788635839884	0.898007482165041	0.0361109758677189	0.110890262415535	0.902914263137886	0.0316101147597892	0.914336114533429	0.956209242024688	0.960150480432637	0.0296482676356868	0.961299985804773
52	nnet	7	LOOCV	6	V2+V3+V4+V5+V6+V7	0.964641242946268	0.0425730573500088	0.92520641421955	NA	NA	0.840445999010807	0.0387536717930775	0.859217057950712	0.926939619366177	0.950202478879403	0.0308480545133617	0.951638945834805
53	nnet	7	repeatedcv	6	V2+V3+V4+V5+V6+V7	0.946389019773298	0.0429144814365966	0.86611832749177	0.0190724778148736	0.130110944969915	0.781407110718348	0.045369820607804	0.807123921222072	0.898400757580976	0.927348387723403	0.0372582813914377	0.929444107308305
54	svmRadial	7	LOOCV	6	V2+V3+V4+V5+V6+V7	0.985711373384468	0.0823722617379903	0.704396190910887	NA	NA	0.856842292678922	0.0393313780804415	0.873684375893166	0.934710851490003	0.968085480426803	0.0252649674343513	0.969006091568337
55	svmRadial	7	repeatedcv	6	V2+V3+V4+V5+V6+V7	0.985711373384468	0.0670417208002747	0.783246216999147	0.049790053207381	0.167030498129385	0.856842292678922	0.0393313780804415	0.873684375893166	0.934710851490003	0.968085480426803	0.0252649674343513	0.969006091568337
56	glmnet	7	LOOCV	6	V2+V3+V4+V5+V6+V7	0.885120509292246	0.0604562793550673	0.839346846438682	NA	NA	0.713598571111306	0.0591696601441133	0.747292856862917	0.864461021019986	0.857701972287621	0.0524273310702818	0.861806723087016
57	glmnet	7	repeatedcv	6	V2+V3+V4+V5+V6+V7	0.885148201873719	0.0572259034411375	0.827418911533111	0.0270806537856506	0.154408055430962	0.712155293929973	0.059368983602561	0.746019376997035	0.863724132461885	0.857557080411867	0.0524766806619418	0.861666010784602
58	lasso.RMSE	7	repeatedcv	5	V2+V3+V4+V5+V7	0.884566782048666	0.0572916004047155	0.82900596211983	0.0282222080970511	0.152450509307397	0.73060453770071	0.0582293316527372	0.757015857533974	0.870066582241827	0.857814682490421	0.0524165595397966	0.861232598776709
59	pls	7	LOOCV	6	V2+V3+V4+V5+V6+V7	0.819189070536241	0.0693188585314646	0.787928520075317	0	0	0.731009705709175	0.0595339920188521	0.762655622684566	0.87330156457238	0.80190995618213	0.0619368838480496	0.807624092061492
60	pls	7	repeatedcv	6	V2+V3+V4+V5+V6+V7	0.819189070536241	0.0650165916456631	0.837152880995769	0.0295469439158715	0.105504943796688	0.731009705709175	0.0595339920188521	0.762655622684566	0.87330156457238	0.80190995618213	0.0619368838480496	0.807624092061492
61	glmStepAIC	7	LOOCV	6	V2+V3+V4+V5+V6+V7	0.884297415785233	0.0610105711793083	0.835602269329446	0	0	0.723776066648288	0.0590735333787731	0.756272999983784	0.869639580506651	0.857786589229594	0.0525238781961077	0.861888899155663
62	glmStepAIC	7	repeatedcv	6	V2+V3+V4+V5+V6+V7	0.884297415785233	0.0576229311151387	0.823774159763052	0.0260123824958431	0.158572142805359	0.723776066648288	0.0590735333787731	0.756272999983784	0.869639580506651	0.857786589229594	0.0525238781961077	0.861888899155663
63	lm	7	LOOCV	6	V2+V3+V4+V5+V6+V7	0.885188513340096	0.0613605989629745	0.833655546565571	0	0	0.708319856883954	0.0598012927609154	0.742635167838783	0.86176282574661	0.857223320933486	0.0525901355796651	0.861341878983481
64	lm	7	repeatedcv	6	V2+V3+V4+V5+V6+V7	0.885188513340096	0.0577417367441157	0.823108746556292	0.0261971437497674	0.157485419624877	0.708319856883954	0.0598012927609154	0.742635167838783	0.86176282574661	0.857223320933486	0.0525901355796651	0.861341878983481
65	svmRFE	6	repeatedcv	4	V3+V7+V6+V4	0.908674313205024	0.13344384224336	0.706778798974121	0.0259974114847881	0.315081820962298	0.722803632784397	0.121022798222959	0.744544524330718	0.862869934770426	0.889315719930031	0.119820365001037	0.89144426377753
66	rfRFE	6	repeatedcv	6	V4+V5+V3+V2+V6+V7	0.971473931031632	0.0491713545069302	0.929096459754823	0.0314462979533864	0.0645941205453069	0.933114634697193	0.0235599790866781	0.940983501203406	0.970043040902519	0.967326356996033	0.0276495281213667	0.96826886592884
67	rf	6	repeatedcv	6	V2+V3+V4+V5+V6+V7	0.970948777831864	0.0486291020257119	0.909889216863433	0.0320685467803215	0.0739931600241074	0.933060643815134	0.0235553158441068	0.940935862189824	0.970018485488717	0.966837323254999	0.027731567265162	0.967793938930335
68	nnet	6	LOOCV	6	V2+V3+V4+V5+V6+V7	0.971163959079682	0.0442913820657707	0.915693082469667	NA	NA	0.715769917579574	0.0537892122770232	0.749208750805506	0.865568455297157	0.937950553295482	0.034651847415299	0.93974044118119
69	nnet	6	repeatedcv	6	V2+V3+V4+V5+V6+V7	0.942603276780319	0.0427348314951254	0.892901367282153	0.0194965115161546	0.118370901282094	0.769338121325488	0.0434110144475535	0.796474812934254	0.892454375827837	0.925421492803479	0.0377472139407962	0.927572795895686
70	svmRadial	6	LOOCV	6	V2+V3+V4+V5+V6+V7	0.98621606428699	0.0826869136741114	0.70940446925887	NA	NA	0.831062747828074	0.037273843449838	0.85093771867183	0.922462854900852	0.969826319619359	0.0242352424553587	0.970696714245723
71	svmRadial	6	repeatedcv	6	V2+V3+V4+V5+V6+V7	0.98621606428699	0.0688973294138258	0.797034883976169	0.0532777578608634	0.178238558147351	0.831062747828074	0.037273843449838	0.85093771867183	0.922462854900852	0.969826319619359	0.0242352424553587	0.970696714245723
72	glmnet	6	LOOCV	5	V2+V3+V4+V5+V7	0.879738008045157	0.0624496559673376	0.831079226732064	NA	NA	0.732130740015268	0.0524615970178724	0.758392432170634	0.870857297248311	0.858565534248487	0.0521201303646793	0.861965401213667
73	glmnet	6	repeatedcv	6	V2+V3+V4+V5+V6+V7	0.88232169425088	0.0576018209776136	0.854585761283682	0.0286732541935517	0.138975565850188	0.697673496412111	0.0563936595644017	0.733241320363628	0.856295112892528	0.85658864992967	0.0524803523202187	0.860725515797083
74	lasso.RMSE	6	repeatedcv	6	V2+V3+V4+V5+V6+V7	0.881086823245681	0.0583805542094137	0.853752628001127	0.0296630568282012	0.139935936884911	0.712075304680039	0.0545504421499207	0.745948798247093	0.863683274266147	0.85772505291296	0.0522147877432577	0.861829137925086
75	pls	6	LOOCV	6	V2+V3+V4+V5+V6+V7	0.809996880694106	0.0713259853520596	0.77965422193623	0	0	0.735318077348456	0.0529790080532066	0.766457127072167	0.875475372053473	0.7992369277571	0.0621522138451551	0.805028170225645
76	pls	6	repeatedcv	6	V2+V3+V4+V5+V6+V7	0.809996880694106	0.066307935676487	0.851570884278528	0.0266164231885616	0.0806230272331337	0.735318077348456	0.0529790080532066	0.766457127072167	0.875475372053473	0.7992369277571	0.0621522138451551	0.805028170225645
77	glmStepAIC	6	LOOCV	6	V2+V3+V4+V5+V6+V7	0.882654412331495	0.0633119610459625	0.82623452835437	0	0	0.684375445320136	0.0584133320561107	0.721507745870709	0.849416120562065	0.855018895237368	0.0529469096802513	0.859201042490136
78	glmStepAIC	6	repeatedcv	6	V2+V3+V4+V5+V6+V7	0.882654412331495	0.0588470823072634	0.848188717847413	0.0284228698561744	0.145771866433979	0.684375445320136	0.0584133320561107	0.721507745870709	0.849416120562065	0.855018895237368	0.0529469096802513	0.859201042490136
79	lm	6	LOOCV	6	V2+V3+V4+V5+V6+V7	0.882654412331495	0.0627837086170258	0.829138120408762	0	0	0.684375445320136	0.0584133320561107	0.721507745870709	0.849416120562065	0.855018895237368	0.0529469096802513	0.859201042490136
80	lm	6	repeatedcv	6	V2+V3+V4+V5+V6+V7	0.882654412331495	0.0581576083466347	0.84793827042339	0.0282617256274064	0.146000566876597	0.684375445320136	0.0584133320561107	0.721507745870709	0.849416120562065	0.855018895237368	0.0529469096802513	0.859201042490136
81	svmRFE	5	repeatedcv	2	V7+V3	0.900179991934641	0.136454000723692	0.584118969272747	0.0335541629809593	0.327464937670867	0.5388751296397	0.122669211930383	0.556958457889124	0.746296494624706	0.865690323870158	0.117736055126652	0.866981763063714
82	rfRFE	5	repeatedcv	6	V4+V5+V6+V3+V2+V7	0.977832537871263	0.0440315546582219	0.93940658060048	0.0462719455847579	0.0523769297232693	0.898405388416001	0.0287825314205595	0.910357695661177	0.95412666646582	0.966823218438751	0.0265539806203495	0.967780240983787
83	rf	5	repeatedcv	6	V2+V3+V4+V5+V6+V7	0.980956489905652	0.0418151358661126	0.926425946794417	0.0275839704279449	0.0609389906188103	0.877702341791642	0.0422391058527774	0.89209030158086	0.944505321097166	0.956137056171365	0.0290027227719546	0.957402333397191
84	nnet	5	LOOCV	6	V2+V3+V4+V5+V6+V7	0.969940620513823	0.042942060103218	0.922402949864587	NA	NA	0.895030423705678	0.0281095353006816	0.907379785622656	0.952564845888539	0.963179260032998	0.0265442982226229	0.964241396762815
85	nnet	5	repeatedcv	6	V2+V3+V4+V5+V6+V7	0.970109775507321	0.0438566263111137	0.891895104090733	0.0211754856913369	0.109035250451118	0.900368897106876	0.0276603877026875	0.912090203329596	0.955034137258767	0.963618749836095	0.0263808551227684	0.964668208975438
86	svmRadial	5	LOOCV	6	V2+V3+V4+V5+V6+V7	0.987398865579118	0.0786666772647805	0.737816689309981	NA	NA	0.645522394501907	0.0500157959442515	0.687225642207565	0.828990737106009	0.956412873422413	0.0289666210306616	0.957670194381381
87	svmRadial	5	repeatedcv	6	V2+V3+V4+V5+V6+V7	0.987677548123538	0.0632245687794301	0.821131610023034	0.0524979202085124	0.156630714356135	0.647155194782433	0.0499541958609667	0.688666348337441	0.829859234049632	0.956714890072019	0.0288448682246457	0.957963499012249
88	glmnet	5	LOOCV	5	V2+V3+V4+V5+V7	0.872375476797139	0.0646872670131313	0.821330747496434	NA	NA	0.774710989242149	0.0458286668200771	0.796798147159585	0.892635506329199	0.859353789335531	0.0519847589020209	0.862734707861119
89	glmnet	5	repeatedcv	6	V2+V3+V4+V5+V6+V7	0.872141090881348	0.0597720983474446	0.825403449256632	0.0265937462587862	0.161762559767659	0.766612923762355	0.0462644384709963	0.794070226849137	0.891106181579467	0.859025761259922	0.0519428278031485	0.863092325838963
90	lasso.RMSE	5	repeatedcv	5	V2+V3+V4+V5+V7	0.87261086776694	0.0600735876139951	0.823796464762262	0.0267219642200564	0.165276648522166	0.773387369780052	0.0460808497901448	0.795604294311419	0.891966532057913	0.859471232948067	0.051977723461888	0.862849328309892
91	pls	5	LOOCV	6	V2+V3+V4+V5+V6+V7	0.802797608431076	0.0729880369431006	0.77247006168807	0	0	0.751139445323064	0.0484419290068988	0.780417157637997	0.883412224070959	0.796231226994095	0.0625764523379596	0.802109172369265
92	pls	5	repeatedcv	6	V2+V3+V4+V5+V6+V7	0.802797608431076	0.0669895042915217	0.830566131818092	0.0278391421781796	0.0884833037624455	0.751139445323064	0.0484419290068988	0.780417157637997	0.883412224070959	0.796231226994095	0.0625764523379596	0.802109172369265
93	glmStepAIC	5	LOOCV	6	V2+V3+V4+V5+V6+V7	0.872351012740621	0.0649929842434746	0.819459757421508	0	0	0.76003948891594	0.04765744476259	0.78827013727877	0.887845784626345	0.858643014101627	0.0521715404150623	0.86272061946408
94	glmStepAIC	5	repeatedcv	6	V2+V3+V4+V5+V6+V7	0.872351012740621	0.0600416548794622	0.820364667122852	0.0251744870015559	0.169193657845246	0.76003948891594	0.04765744476259	0.78827013727877	0.887845784626345	0.858643014101627	0.0521715404150623	0.86272061946408
95	lm	5	LOOCV	6	V2+V3+V4+V5+V6+V7	0.873082034177423	0.0664709479355079	0.811155357767498	0	0	0.751994832519568	0.0485822692687721	0.781171911046678	0.88383930159655	0.858190914181958	0.0522653127469564	0.862281560888247
96	lm	5	repeatedcv	6	V2+V3+V4+V5+V6+V7	0.873082034177423	0.0604510659050887	0.816963236548164	0.0255129328514743	0.170749214388442	0.751994832519568	0.0485822692687721	0.781171911046678	0.88383930159655	0.858190914181958	0.0522653127469564	0.862281560888247
97	svmRFE	4	repeatedcv	2	V7+V3	0.876982839969398	0.131757532991082	0.731865837755774	0.0286904006562941	0.154735929910554	0.667343818731202	0.123429701633671	0.680389159173116	0.824857053781512	0.865385156234004	0.117645435318988	0.866679529731754
98	rfRFE	4	repeatedcv	2	V4+V5	0.95287479585552	0.0452936071058816	0.904592292302606	0.0188832287036025	0.122358406296467	0.717809465175542	0.0389336514150236	0.728875760658854	0.853742209720741	0.938407798007642	0.0361173912328529	0.939000030719107
99	rf	4	repeatedcv	6	V2+V3+V4+V5+V6+V7	0.969933476238142	0.0458946368573506	0.927249594759131	0.0264902721494517	0.0518499166722193	0.862709294868748	0.0255769538118331	0.878861142531248	0.937475942374655	0.964420284975264	0.0273003542410259	0.96544662290867
100	nnet	4	LOOCV	6	V2+V3+V4+V5+V6+V7	0.975119961115686	0.0417016143843642	0.927254900419209	NA	NA	0.810994591221617	0.0303304822853709	0.833230521666132	0.912814615169001	0.965615572665536	0.0256566951280974	0.966607431146338
101	nnet	4	repeatedcv	6	V2+V3+V4+V5+V6+V7	0.977945986780408	0.0429860649961974	0.900739242185205	0.0223198708459339	0.109640185830663	0.700763549560374	0.0391095343307979	0.735967837847389	0.857885678775085	0.960288736314989	0.0275955970624269	0.961434253536672
102	svmRadial	4	LOOCV	6	V2+V3+V4+V5+V6+V7	0.984571524678784	0.0798659284975892	0.735154910598559	NA	NA	0.683323570628956	0.0389530158582081	0.720579621143196	0.848869613747127	0.966650048140351	0.0257759074963738	0.967612065982456
103	svmRadial	4	repeatedcv	6	V2+V3+V4+V5+V6+V7	0.984571524678784	0.0642887132945819	0.816335420445007	0.0489609337506954	0.178132661777443	0.683323570628956	0.0389530158582081	0.720579621143196	0.848869613747127	0.966650048140351	0.0257759074963738	0.967612065982456
104	glmnet	4	LOOCV	6	V2+V3+V4+V5+V6+V7	0.865127595440915	0.0665663226558335	0.814980947662758	0	0	0.808924583306255	0.0373166603422478	0.831404044093755	0.911813601616994	0.860240150134828	0.0517181504376802	0.864271684265554
105	glmnet	4	repeatedcv	5	V2+V3+V4+V5+V7	0.864838926888665	0.0620590606804773	0.838510629266405	0.028278397430394	0.139944816254858	0.81977383896644	0.0357622304096751	0.837443070440319	0.91511915641643	0.860009709859408	0.0518534298999901	0.863374861064711
106	lasso.RMSE	4	repeatedcv	5	V2+V3+V4+V5+V7	0.864920167501561	0.0622583024677304	0.836789616382748	0.028292320543856	0.141465260754325	0.815068472289937	0.0365221773545827	0.833199014222296	0.912797356603478	0.860073453885918	0.0518326846613765	0.863437072782892
107	pls	4	LOOCV	6	V2+V3+V4+V5+V6+V7	0.807013049326018	0.0725308467834752	0.77983276068426	0	0	0.768307096837908	0.0456253283570315	0.795565085445213	0.891944552898448	0.80061519041865	0.0620126135486984	0.80636667531042
108	pls	4	repeatedcv	6	V2+V3+V4+V5+V6+V7	0.807013049326018	0.0674662315524526	0.847943925603243	0.0259682764458729	0.0791857703518553	0.768307096837908	0.0456253283570315	0.795565085445213	0.891944552898448	0.80061519041865	0.0620126135486984	0.80636667531042
109	glmStepAIC	4	LOOCV	6	V2+V3+V4+V5+V6+V7	0.864995973117689	0.0661148368027569	0.816899889463244	0	0	0.804900565484171	0.0380403444748928	0.827853440133092	0.909864517460205	0.860093250919366	0.0518448098536999	0.864129022527461
110	glmStepAIC	4	repeatedcv	6	V2+V3+V4+V5+V6+V7	0.864995973117689	0.0619033832877275	0.8351911780867	0.0271215987543505	0.148514837641369	0.804900565484171	0.0380403444748928	0.827853440133092	0.909864517460205	0.860093250919366	0.0518448098536999	0.864129022527461
111	lm	4	LOOCV	6	V2+V3+V4+V5+V6+V7	0.865393435171527	0.0677400794145599	0.807808487953065	0	0	0.801808112693286	0.0384751982634164	0.825124805317605	0.908363806697297	0.860043267801288	0.0518585520006319	0.864080481230097
112	lm	4	repeatedcv	6	V2+V3+V4+V5+V6+V7	0.865393435171527	0.0627512189659114	0.831847577400207	0.0275806681367613	0.146450870732291	0.801808112693286	0.0384751982634164	0.825124805317605	0.908363806697297	0.860043267801288	0.0518585520006319	0.864080481230097
113	svmRFE	3	repeatedcv	4	V7+V3+V5+V6	0.875089747539574	0.102146832495093	0.740834438070631	0.0233376632207237	0.181081518310284	0.627702603414119	0.144817415205853	0.656902399224776	0.810495156817594	0.762804426045736	0.102354403020932	0.767365879391011
114	rfRFE	3	repeatedcv	6	V4+V5+V3+V6+V2+V7	0.965786373143178	0.0402672017346088	0.88136014188232	0.0337281869727409	0.100104084941677	0.851731185620912	0.0931918371124435	0.869174575547864	0.932295326357407	0.89561605308303	0.05080037123395	0.898627128474865
115	rf	3	repeatedcv	6	V2+V3+V4+V5+V6+V7	0.965638983799351	0.0389389632496343	0.899499951983795	0.0312641245357011	0.084760149957779	0.855021604464265	0.092293281685014	0.872077886291998	0.933851104990511	0.897533334155775	0.0504050455395183	0.90048910336282
116	nnet	3	LOOCV	6	V2+V3+V4+V5+V6+V7	0.949311133076635	0.0389157769085302	0.891416953859576	NA	NA	0.930198676495777	0.052269430189799	0.938410596908039	0.96871595264455	0.940728299243901	0.0344700857631689	0.942438059842635
117	nnet	3	repeatedcv	6	V2+V3+V4+V5+V6+V7	0.954464495241573	0.0368331957021598	0.897508441749727	0.0175021363379006	0.0988164325859149	0.923124642910604	0.057692718977644	0.93216880256818	0.965488893032012	0.937518683810492	0.035848160135149	0.939321029469805
118	svmRadial	3	LOOCV	6	V2+V3+V4+V5+V6+V7	0.97881437832022	0.0668226252547715	0.683568363476464	NA	NA	0.627549558272545	0.11594663182209	0.671367257299304	0.81937003685716	0.820292318580721	0.0596810470003371	0.825476194006278
119	svmRadial	3	repeatedcv	6	V2+V3+V4+V5+V6+V7	0.97881437832022	0.0568156283267119	0.793851756396538	0.0390606160592917	0.139934699514936	0.627549558272545	0.11594663182209	0.671367257299304	0.81937003685716	0.820292318580721	0.0596810470003371	0.825476194006278
120	glmnet	3	LOOCV	5	V2+V3+V4+V5+V7	0.875030817527761	0.0533284846747747	0.795337927094266	NA	NA	0.826126731201077	0.082663219242899	0.843173130102933	0.918244591654605	0.853247173799748	0.054513753799904	0.856774885968024
121	glmnet	3	repeatedcv	6	V2+V3+V4+V5+V6+V7	0.876739555801323	0.0475814346076626	0.834487540453595	0.0247102122036911	0.131013261308014	0.820968228119025	0.0806001418278203	0.842030789516787	0.917622356700613	0.854036353688164	0.0533902039046989	0.858246843485621
122	lasso.RMSE	3	repeatedcv	5	V2+V3+V4+V5+V7	0.876381592699686	0.0481722168430508	0.831890934220981	0.0251282788223225	0.133462609220688	0.828122052185104	0.0809547609465126	0.844972831382643	0.919224037644057	0.854963155238839	0.0536513417369866	0.85844961785329
123	pls	3	LOOCV	6	V2+V3+V4+V5+V6+V7	0.798642351575924	0.0558779216289774	0.774878940001003	0	0	0.775082045768893	0.0952429695008175	0.801542981560788	0.895289328407743	0.784016385732168	0.0653667009354561	0.790246682297586
124	pls	3	repeatedcv	6	V2+V3+V4+V5+V6+V7	0.798642351575924	0.0527105632646072	0.820193047846805	0.0182127096618182	0.0869264034562866	0.775082045768893	0.0952429695008175	0.801542981560788	0.895289328407743	0.784016385732168	0.0653667009354561	0.790246682297586
125	glmStepAIC	3	LOOCV	6	V2+V3+V4+V5+V6+V7	0.875886057462578	0.0543181113453286	0.78746336857051	0	0	0.82522571580671	0.0799239328212888	0.845787396300038	0.919667002941846	0.854933408921301	0.0532152132454433	0.859118022125495
126	glmStepAIC	3	repeatedcv	6	V2+V3+V4+V5+V6+V7	0.875886057462578	0.0487650633733724	0.827224944255215	0.0244124839220199	0.137325001676045	0.82522571580671	0.0799239328212888	0.845787396300038	0.919667002941846	0.854933408921301	0.0532152132454433	0.859118022125495
127	lm	3	LOOCV	6	V2+V3+V4+V5+V6+V7	0.876826171959311	0.0546053227884018	0.785083086744945	0	0	0.81950837885869	0.0805483258445888	0.840742687228256	0.916920218573163	0.853629607391927	0.0533608165648589	0.857851830255621
128	lm	3	repeatedcv	6	V2+V3+V4+V5+V6+V7	0.876826171959311	0.0490348903435401	0.826164242274389	0.024311639198825	0.137173689772172	0.81950837885869	0.0805483258445888	0.840742687228256	0.916920218573163	0.853629607391927	0.0533608165648589	0.857851830255621
129	svmRFE	2	repeatedcv	6	V3+V7+V6+V5+V4+V2	0.936730109551433	0.124300265760422	0.753566562700358	0.0340730196169273	0.19547921941504	0.593002509308375	0.130965545599627	0.640884567036802	0.800552663499911	0.861172436985613	0.112703337666628	0.865177078226412
130	rfRFE	2	repeatedcv	2	V4+V5	0.963935541394525	0.0425045665686764	0.879753703862569	0.0200050403757128	0.0993907075598088	0.864104624474031	0.0535553100717751	0.869433854886814	0.932434370283943	0.940146255595754	0.0366606887324898	0.940721772368872
131	rf	2	repeatedcv	6	V2+V3+V4+V5+V6+V7	0.977495214662502	0.0446174202474943	0.865976394977214	0.0279863447939227	0.109708240455289	0.862442727818031	0.048718850922977	0.878625936310027	0.937350487443212	0.949231925573006	0.0323662220540283	0.9506963892584
132	nnet	2	LOOCV	6	V2+V3+V4+V5+V6+V7	0.966832112919412	0.0394204900815811	0.921576274667415	NA	NA	0.827712859386185	0.054382104087254	0.847981934752516	0.920859345802884	0.936879644978162	0.0347275707959505	0.938700424449946
133	nnet	2	repeatedcv	6	V2+V3+V4+V5+V6+V7	0.966428797751488	0.0421917401946287	0.84293161708572	0.0202985873857016	0.166035808808212	0.827440047805824	0.0543435053744181	0.847741218652198	0.920728634643345	0.936640671260678	0.0347945824021771	0.938468344205082
134	svmRadial	2	LOOCV	6	V2+V3+V4+V5+V6+V7	0.986842186987839	0.0787182550909983	0.6923500163744	NA	NA	0.61397486661777	0.0835491754423119	0.65938958819215	0.812028071061678	0.900398026361145	0.0439274371140698	0.903271160216112
135	svmRadial	2	repeatedcv	6	V2+V3+V4+V5+V6+V7	0.985205581492763	0.0613335054166053	0.779525728134009	0.0563336371036751	0.174620634553783	0.612437774409981	0.0835416738000703	0.658033330361748	0.811192535938138	0.899899204559145	0.0442834976805365	0.902786727504555
136	glmnet	2	LOOCV	5	V2+V3+V4+V5+V7	0.859642843127031	0.0687162805108995	0.759739163996526	NA	NA	0.848457101332633	0.0542311564225216	0.863314248260806	0.929147054163552	0.85857668837583	0.052293004289938	0.861976287212949
137	glmnet	2	repeatedcv	5	V2+V3+V4+V5+V7	0.859634899222002	0.0622330131430072	0.796424528226395	0.0293865124179787	0.161019954992748	0.849079231562439	0.0540465228274725	0.863875385330828	0.929448968653378	0.858724932915628	0.0522488932523971	0.862120968182079
138	lasso.RMSE	2	repeatedcv	5	V2+V3+V4+V5+V7	0.857710847285112	0.0622119717936854	0.797619732385975	0.0305473163670361	0.160322161508825	0.852108494563262	0.0524036353897722	0.866607661762942	0.930917644994949	0.857951499498005	0.0522510921371538	0.861366126913918
139	pls	2	LOOCV	6	V2+V3+V4+V5+V6+V7	0.807367854515202	0.0685115334543766	0.761301881804884	0	0	0.767820443190529	0.0677402984731149	0.795135685168114	0.891703810224064	0.799851921237382	0.0622237372907334	0.805625423509381
140	pls	2	repeatedcv	6	V2+V3+V4+V5+V6+V7	0.807367854515202	0.061987761088289	0.818098749335545	0.0267973191893128	0.107934174981954	0.767820443190529	0.0677402984731149	0.795135685168114	0.891703810224064	0.799851921237382	0.0622237372907334	0.805625423509381
141	glmStepAIC	2	LOOCV	6	V2+V3+V4+V5+V6+V7	0.858741421571796	0.0693348731088495	0.755064704083536	0	0	0.843972596298667	0.0546488514088549	0.86232876144	0.928616584732364	0.85763918715252	0.0523932347616742	0.861745749061582
142	glmStepAIC	2	repeatedcv	6	V2+V3+V4+V5+V6+V7	0.858741421571796	0.0627275941181805	0.792730232103003	0.028930646003593	0.163867163402725	0.843972596298667	0.0546488514088549	0.86232876144	0.928616584732364	0.85763918715252	0.0523932347616742	0.861745749061582
143	lm	2	LOOCV	6	V2+V3+V4+V5+V6+V7	0.858765613809296	0.0694645653153433	0.754117622280084	0	0	0.843914768410218	0.0545432029580935	0.862277736832545	0.928589110873343	0.857751027596611	0.052362562851906	0.861854363339017
144	lm	2	repeatedcv	6	V2+V3+V4+V5+V6+V7	0.858765613809296	0.0632655459456987	0.789751758784	0.0288930989210325	0.167117495490774	0.843914768410218	0.0545432029580935	0.862277736832545	0.928589110873343	0.857751027596611	0.052362562851906	0.861854363339017
145	svmRFE	1	repeatedcv	4	V3+V7+V6+V5	0.886102001850221	0.113138451669868	0.707316133650356	0.0382217962022309	0.2089185667552	0.802485472388182	0.126687611534091	0.817976807887148	0.904420702929311	0.854614477816997	0.106061397636788	0.857410353243593
146	rfRFE	1	repeatedcv	2	V4+V5	0.940547661040784	0.0434335672774883	0.870000856061316	0.031954404546102	0.101152465754401	0.922792198187526	0.0590067337979906	0.925819955121349	0.962195383028493	0.933414349997445	0.0407861713177558	0.934054596632085
147	rf	1	repeatedcv	6	V2+V3+V4+V5+V6+V7	0.971965936375884	0.045296116117512	0.893952058690911	0.0352369113625331	0.0707813132685357	0.910244153413503	0.0585726480292193	0.92080366477662	0.95958515243652	0.949834745228917	0.0361678855739527	0.951281819885775
148	nnet	1	LOOCV	6	V2+V3+V4+V5+V6+V7	0.962936510024998	0.0333063988140661	0.927452015081005	NA	NA	0.906281522307557	0.0553550717410107	0.917307225565492	0.957761570311469	0.941012004538354	0.0341884867675275	0.942713581330516
149	nnet	1	repeatedcv	6	V2+V3+V4+V5+V6+V7	0.964834610398179	0.0306833144187655	0.911767302011115	0.0135226310146785	0.0697885656595719	0.906157162182758	0.0549173272441117	0.917197496043609	0.957704284235802	0.942377284949404	0.0337047591068874	0.944039478652786
150	svmRadial	1	LOOCV	6	V2+V3+V4+V5+V6+V7	0.98623142303589	0.0871455665626234	0.512861606821228	NA	NA	0.859571236707451	0.0758567163436177	0.876092267683045	0.935998006238819	0.92535003735453	0.0398008180988199	0.927503401661611
151	svmRadial	1	repeatedcv	6	V2+V3+V4+V5+V6+V7	0.986958150475523	0.0638489279259716	0.777026796390719	0.0595513808831172	0.190002429344271	0.848104560361276	0.0769433535156839	0.865974612083479	0.930577569084641	0.922726379948774	0.0402103531087285	0.924955426681021
152	glmnet	1	LOOCV	6	V2+V3+V4+V5+V6+V7	0.888886843195313	0.0549182807708887	0.80343555296925	0	0	0.798570590232978	0.0815524112927961	0.822268167852628	0.906790035152917	0.856667317489283	0.0537421422964011	0.860801914100169
153	glmnet	1	repeatedcv	6	V2+V3+V4+V5+V6+V7	0.889257312364992	0.0472156970269957	0.856257849298518	0.0267739534343815	0.0992897591993266	0.79774253121531	0.0812994018626264	0.82153752754292	0.906387073795142	0.856672986050611	0.053567569543222	0.860807419145305
154	lasso.RMSE	1	repeatedcv	6	V2+V3+V4+V5+V6+V7	0.887723523001912	0.0484240541797616	0.850459956328852	0.0287696603426361	0.10207374217667	0.788837205383386	0.0828134890134462	0.813679887102987	0.902042065040754	0.852933946939677	0.0543443215630492	0.857176236931802
155	pls	1	LOOCV	6	V2+V3+V4+V5+V6+V7	0.795765101313895	0.0623099810661008	0.744453473608809	0	0	0.791538818182203	0.0857357617004967	0.816063663101944	0.903362420682831	0.793454882251402	0.0637814132784546	0.79941291449415
156	pls	1	repeatedcv	6	V2+V3+V4+V5+V6+V7	0.795765101313895	0.0547082595704083	0.837107500336358	0.0290673654727031	0.0788214137579567	0.791538818182203	0.0857357617004967	0.816063663101944	0.903362420682831	0.793454882251402	0.0637814132784546	0.79941291449415
157	glmStepAIC	1	LOOCV	6	V2+V3+V4+V5+V6+V7	0.889944241804157	0.0548520919617708	0.802695244652519	0	0	0.794167850150909	0.0798097445470931	0.818383397191979	0.904645453861334	0.856572588731588	0.0528338657577232	0.860709917902792
158	glmStepAIC	1	repeatedcv	6	V2+V3+V4+V5+V6+V7	0.889944241804157	0.048268289500734	0.849191284057418	0.0254138112004267	0.104784315471476	0.794167850150909	0.0798097445470931	0.818383397191979	0.904645453861334	0.856572588731588	0.0528338657577232	0.860709917902792
159	lm	1	LOOCV	6	V2+V3+V4+V5+V6+V7	0.890190483538124	0.0549969766701915	0.801474276911353	0	0	0.792071849421889	0.0803895840397351	0.81653398478402	0.90362270045856	0.855640580113374	0.0530266816718896	0.859804794148565
160	lm	1	repeatedcv	6	V2+V3+V4+V5+V6+V7	0.890190483538124	0.0485096725557947	0.848941549234766	0.0254584039565155	0.105266701095199	0.792071849421889	0.0803895840397351	0.81653398478402	0.90362270045856	0.855640580113374	0.0530266816718896	0.859804794148565
