# Supplementary material for: A methodology for the design of experiments in computational intelligence with multiple regression models
Source: PeerJ. 2016 Dec 1;4:e2721. doi: 10.7717/peerj.2721 (PMC5136129; doi:10.7717/peerj.2721)
Supplement: Data S1 — Datailed results from UC Irvine Machine Learning Repository (Housing, Machine CPU, Wine Quality, Automobile and Parkinson) and the 3 Use Cases (Protein Corona, Gajewicz Metal Oxides and Aquatic Toxicity) [file peerj-04-2721-s001.zip › 2_machineCPU/RRegrsResBest.csv]

Averaged values for all spits:
RegrMeth	CVtype	adjR2.tr.Avg	RMSE.tr.Avg	R2.tr.Avg	RMSEsd.tr.Avg	R2sd.tr.Avg	adjR2.ts.Avg	RMSE.ts.Avg	R2.ts.Avg	corP.ts.Avg	adjR2.both.Avg	RMSE.both.Avg	R2.both.Avg	NoModelFeats.Avg
1	nnet	repeatedcv	0.961696487018257	0.0412956076438929	0.887088375190006	0.0198308462876516	0.11082658436742	0.860752929014746	0.0429466235056327	0.877134937365952	0.935683119249419	0.946398807015656	0.0320780621503473	0.94794499527482	6
RRegr package | eNanoMapper
Regression method: nnet
Split no.: 10
CV type: repeatedcv
Training Set Summary:
net.c	V2	V3	V4	V5	V6	V7
	Min. :0.00000	Min. :0.00000	Min. :0.002004	Min. :0.007007	Min. :0.00000	Min. :0.00000	Min. :0.00000
	1st Qu.:0.01923	1st Qu.:0.02225	1st Qu.:0.022044	1st Qu.:0.061562	1st Qu.:0.00000	1st Qu.:0.01923	1st Qu.:0.03409
	Median :0.03846	Median :0.06271	Median :0.060621	Median :0.124124	Median :0.03125	Median :0.05769	Median :0.04545
	Mean :0.08954	Mean :0.12464	Mean :0.095347	Mean :0.188040	Mean :0.08601	Mean :0.08831	Mean :0.10140
	3rd Qu.:0.09353	3rd Qu.:0.14026	3rd Qu.:0.123246	3rd Qu.:0.249249	3rd Qu.:0.12500	3rd Qu.:0.11538	3rd Qu.:0.13636
	Max. :1.00000	Max. :1.00000	Max. :1.000000	Max. :1.000000	Max. :1.00000	Max. :1.00000	Max. :1.00000
Test Set Summary:
net.c	V2	V3	V4	V5	V6	V7
	Min. :0.00000	Min. :0.005394	Min. :0.00000	Min. :0.00000	Min. :0.00000	Min. :0.00000	Min. :0.00000
	1st Qu.:0.01661	1st Qu.:0.025287	1st Qu.:0.02749	1st Qu.:0.06156	1st Qu.:0.00000	1st Qu.:0.01923	1st Qu.:0.02273
	Median :0.03584	Median :0.063385	Median :0.06062	Median :0.12412	Median :0.04688	Median :0.02885	Median :0.04545
	Mean :0.07966	Mean :0.130025	Mean :0.06501	Mean :0.16979	Mean :0.13604	Mean :0.09652	Mean :0.11101
	3rd Qu.:0.09244	3rd Qu.:0.142785	3rd Qu.:0.06547	3rd Qu.:0.24925	3rd Qu.:0.15625	3rd Qu.:0.11538	3rd Qu.:0.13636
	Max. :0.79458	Max. :0.730276	Max. :0.24850	Max. :1.00000	Max. :1.00000	Max. :1.00000	Max. :1.00000
Predictors:
x
1	V2
2	V3
3	V4
4	V5
5	V6
6	V7
Trainig Results:
x
1	NA
Test Results:
x
1	NA
Full Statistics:
RegrMeth	Split.No	CVtype	NoModelFeats	ModelFeats	adjR2.tr	RMSE.tr	R2.tr	RMSEsd.tr	R2sd.tr	adjR2.ts	RMSE.ts	R2.ts	corP.ts	adjR2.both	RMSE.both	R2.both
1	nnet	10	repeatedcv	6	V2+V3+V4+V5+V6+V7	0.975475139262104	0.0433994595119519	0.91857131339512	0.0304222256824611	0.0698822337658701	0.859765727925765	0.0531441703396756	0.876263877581558	0.936089673899652	0.946408674413178	0.0328071147492484	0.947954578035875
importance
	Overall
V2	11.1214049216301
V3	12.6980615745782
V4	17.1685237305936
V5	22.6062633952022
V6	8.54198729572233
V7	27.8637590822735
model
	x
1	nnet
calledFrom
	x
1	varImp
Residuals of the fitted model:
resids
3	-0.0362917891228986
4	-0.0782498310809405
5	-0.0265693717418615
6	0.0192551559094459
7	-0.0706338105459512
8	0.0360095460974054
9	-0.0339484391389293
10	0.00358506295050764
11	0.0126188394749147
12	0.0115002677146272
16	-0.0109331341757096
17	-0.0157151695407895
18	-0.00355843209320021
19	0.000538258412110391
21	-0.00596606478475454
23	0.0140314978866222
24	0.0180598649220842
25	0.00131269857967072
26	0.0365946130104867
27	0.00872675615348101
28	1.94402825384431e-05
29	0.042439599650972
30	-0.000427825705706517
31	0.0600115359095845
34	-0.0360570325380932
38	-0.00589239641802208
39	0.0230011115701161
40	-0.0123661164588606
42	-0.0194189986577169
43	-0.00929294285431903
44	-0.00229993586131204
45	0.018716701625174
46	0.0236931490736508
47	-0.0113497713029392
49	0.00803672151443905
50	0.0221593116592565
51	0.000807549083652555
52	0.00306528893566505
53	0.0688881141320621
55	-0.0171556317047038
56	0.00571653135705609
57	0.0196627220560685
58	-0.00770394961717909
59	-0.00595569786892734
60	-0.000710942624172097
61	-0.00420744612067559
63	0.00277182647946003
64	0.0194995088909691
65	0.000534887901428971
67	-0.00660611677628583
69	0.00333187529908698
70	-0.0102882432300214
71	0.009212885921966
72	-0.00129571393894593
73	0.000599499166197533
74	0.00710167260706837
76	0.00163237341956349
77	0.0214555688919286
78	0.0137825803145887
79	0.00375837820502586
82	0.010668705425414
83	-0.0463683100619509
84	-0.00638873767157512
85	-0.00533916432185574
86	-0.00384666204280093
87	0.00398955264669357
88	-0.0038257061927209
89	-0.00694945134530388
90	-0.0158667102600599
92	4.97000330552388e-05
93	-0.0151893425563573
96	0.0335353282839367
97	0.0387930432688718
98	0.0575776680333301
99	0.0512167212987522
101	0.000558280556261288
102	-0.000349051348212698
103	-0.0097191108134131
105	-0.00513881719219345
107	-0.00796359909783704
109	-0.0070536571024108
110	-0.00698746505192097
111	-0.00820941588423105
112	0.0103487834335223
113	-0.00244101578932262
115	0.00562041943983119
116	0.00876929276073928
117	-3.87665954541538e-05
118	-0.00650985657404112
120	0.0011345318931793
121	0.010562052523209
122	0.015382147369274
123	-0.00094892968536327
124	0.00433873241926149
126	-0.00626397748226324
127	-0.00354395612450228
128	0.00972252708573191
129	-0.00626732421722908
130	0.00247393452402966
131	-0.0218355056426309
132	-0.0137268246514633
135	-0.0233837937745513
138	0.00861960420823598
140	0.00711429028862413
141	-0.00994624030768122
142	-0.011694492055933
143	0.00911222889818877
144	-0.0149377987707109
145	-0.0132651187941484
148	-0.0306448422400812
149	-0.0112252172889451
151	0.045459542117522
152	-0.00145862200142874
153	0.0796153334792536
154	0.00650205694366329
155	0.0533793294885567
156	0.0412856279496835
157	-0.0149600809090265
159	-0.0103203439894333
160	-0.00757116279078714
161	-0.0101060116167968
162	-0.00998938494394774
163	-0.012193300072181
164	-0.0126918320599151
165	-0.0178687948277639
167	-0.00328693479430385
168	-0.0697697186523925
170	-0.0328337294317124
171	0.00109362406095841
174	0.00202841169828599
175	0.0183159447165366
177	0.00351322950617787
178	0.00302686393949183
179	0.00295924359364558
180	0.00929961433493044
182	-0.0228186252149772
184	-0.0190130033991433
185	-0.0257149761185952
186	-0.00289766875037685
187	0.0165799354105065
188	-1.6846366371448e-05
189	0.00695971596661214
190	-0.0196214383915921
191	-0.0189768465672274
192	-0.0178592268968568
193	0.030281299888082
194	-0.0128405971370353
195	-0.0320515565473959
196	-0.0166780534831551
198	-0.00588406380108886
200	0.0203783971718012
202	-0.0083364105554604
203	-0.00417609347667406
205	0.0109272496549747
206	-0.0220726897082157
207	0.0128536928232589
208	0.00243431801627723
Leverage output:
Mean of hat values: 0.0750596242407064
Leverage / Hat values with warnings (X3 & X2 = values 3 & 2 times than hat mean):
hat.fit	warn
1	0.857843327752098	x3
2	0.0331701173448762	-
13	0.039439921083598	-
14	0.039609179660661	-
15	0.00767057539073771	-
20	0.273034349039435	x3
22	0.0161943071324706	-
32	0.208848609479128	x2
33	0.0364344935970668	-
35	0.0361605588907362	-
36	0.0214266444166919	-
37	0.000523302086104781	-
41	0.00491901463791808	-
48	0.0403360346938786	-
54	0.0062379726957906	-
62	0.041152502478061	-
66	0.168152478863987	x2
68	0.00290894822889694	-
75	0.0144671226479795	-
80	0.0152504587808294	-
81	0.00694280768257336	-
91	0.0963749672410735	-
94	0.0171473918841318	-
95	0.0396914889304723	-
100	0.0143434796932621	-
104	0.0771748074029442	-
106	0.0112388610769669	-
108	0.0522427696202361	-
114	0.00492404261505405	-
119	0.0105072354594956	-
125	0.0407524839373588	-
133	0.00917424225935101	-
134	0.00816109227629633	-
136	0.021336532208465	-
137	0.0190139273168805	-
139	0.00441026661989422	-
146	0.0461443897621141	-
147	0.0375673725541967	-
150	0.00639912669832166	-
158	0.00189657986957364	-
166	0.0625081111199669	-
169	0.278230293522715	x3
172	0.00255270237480671	-
173	0.0493951633526786	-
176	0.0246021685226545	-
181	0.00906995434900399	-
183	0.00376169721513886	-
197	0.584823550621006	x3
199	0.478524608098753	x3
201	0.00271224538495029	-
204	0.00234815147099839	-
209	0.0153480304744533	-
Leverage Threshold: 0.114649681528662
Points with leverage > threshold:
hat.fit.hat.fit...thresh.lever.
1	0.857843327752098
20	0.273034349039435
32	0.208848609479128
66	0.168152478863987
169	0.278230293522715
197	0.584823550621006
199	0.478524608098753
