# Supplementary material for: A methodology for the design of experiments in computational intelligence with multiple regression models
Source: PeerJ. 2016 Dec 1;4:e2721. doi: 10.7717/peerj.2721 (PMC5136129; doi:10.7717/peerj.2721)
Supplement: Data S1 — Datailed results from UC Irvine Machine Learning Repository (Housing, Machine CPU, Wine Quality, Automobile and Parkinson) and the 3 Use Cases (Protein Corona, Gajewicz Metal Oxides and Aquatic Toxicity) [file peerj-04-2721-s001.zip › 2_machineCPU/RRegsResAvgs.csv]

	RegrMeth	CVtype	adjR2.tr.Avg	RMSE.tr.Avg	R2.tr.Avg	RMSEsd.tr.Avg	R2sd.tr.Avg	adjR2.ts.Avg	RMSE.ts.Avg	R2.ts.Avg	corP.ts.Avg	adjR2.both.Avg	RMSE.both.Avg	R2.both.Avg	NoModelFeats.Avg
1	rf	repeatedcv	0.971917283655431	0.0444150581986811	0.905378347842306	0.0316386243395512	0.0792294468592045	0.894975400876424	0.0458383154354791	0.907331236067433	0.952454560940558	0.950396696019405	0.0331607258924572	0.951827560557307	6
2	rfRFE	repeatedcv	0.964728893138437	0.0441386431796089	0.910077204409248	0.0320812001710492	0.0810007619814081	0.885323558886837	0.0459706482514355	0.894930248334166	0.945396240229795	0.946069101270547	0.0348011816788972	0.947263201048514	4.8
3	nnet	repeatedcv	0.961696487018257	0.0412956076438929	0.887088375190006	0.0198308462876516	0.11082658436742	0.860752929014746	0.0429466235056327	0.877134937365952	0.935683119249419	0.946398807015656	0.0320780621503473	0.94794499527482	6
4	lasso.RMSE	repeatedcv	0.867528747328766	0.0576835610892037	0.829643570068708	0.0292073225589282	0.141040079730901	0.807976090365912	0.0552478396252267	0.827921785701166	0.909182699712052	0.856978164766294	0.0526847171441408	0.860623361062286	5.3
5	glmnet	repeatedcv	0.868007495880558	0.0572180066848786	0.831601482172954	0.0283568907015	0.13886283383215	0.802353394780197	0.0554932816397178	0.824956628865916	0.907437509669238	0.856801502599351	0.0526239585554619	0.860797004756473	5.8
6	glmStepAIC	repeatedcv	0.868286565038024	0.0577832595034715	0.826460489376019	0.0274515720278324	0.145245788391076	0.801539232327299	0.0558010973336555	0.824887557935852	0.907407877373924	0.857420319741904	0.0524772687417331	0.861533195133965	6
7	lm	repeatedcv	0.868636214423245	0.0581457688033116	0.824736036860927	0.0274107585243927	0.14574233092264	0.798018810346224	0.0561643400877484	0.821781303246668	0.905656644359695	0.857086539666528	0.0525294347084861	0.861209043329994	6
8	pls	repeatedcv	0.80267701520953	0.062445683803388	0.83189585748071	0.0266890403930442	0.0906608383670758	0.765592992582592	0.0643226134488886	0.793170287572875	0.890218032705296	0.795923830210445	0.0628869147365783	0.801810642800528	6
9	svmRadial	repeatedcv	0.984634089278886	0.0625786796210701	0.803337632756552	0.0501186101503308	0.161899424881609	0.734246542044252	0.0660263527563267	0.765511654744928	0.87316208556608	0.924036400798916	0.036753815797392	0.926227658468178	6
10	svmRFE	repeatedcv	0.881760488057776	0.123811196298458	0.726124397180975	0.0282285519998596	0.202239728462874	0.653766603275062	0.128085297397215	0.676587082005709	0.819343263870124	0.831757435169561	0.114255292442875	0.834473434980732	3.4
