# Supplementary material for: A methodology for the design of experiments in computational intelligence with multiple regression models
Source: PeerJ. 2016 Dec 1;4:e2721. doi: 10.7717/peerj.2721 (PMC5136129; doi:10.7717/peerj.2721)
Supplement: Data S1 — Datailed results from UC Irvine Machine Learning Repository (Housing, Machine CPU, Wine Quality, Automobile and Parkinson) and the 3 Use Cases (Protein Corona, Gajewicz Metal Oxides and Aquatic Toxicity) [file peerj-04-2721-s001.zip › 3_winequality/Parameters.csv]

RRegrs.Parameters	Parameter.Value	Description
DataFileName	~/github/RRegrs/TEST/ds/ds.winequality-red.csv	Input dataset file (Step 1)
PathDataSet	DataResults	Working folder for all input and output files
noCores	4	No of CPU cores (0=all available; 1=no parallel; >1 = specific no. of cores)
ResAvgs	RRegsResAvgs.csv	Output file averaged statistics (by splits) for each regression method
ResBySplits	RRegrsResAllSplits.csv	Output file statistics for each splitting and each regression method
ResBest	RRegrsResBest.csv	Output file statistics for the best model
fDet	FALSE	If calculate and print details for all the functions
fFilters	F	If run Filters (Step 2)
fScaling	T	If Scaling dataset (Step 3)
fRemNear0Var	T	If run Removal of near zero variance columns (Step 4)
fRemCorr	T	If run Removal of correlated columns (Step 5)
fLM	T	If run LM (Step 8.1)
fGLM	T	If run GLM (Step 8.2)
fPLS	T	If run PLS (Step 8.3)
fLASSO	T	If run LASSO (Step 8.4)
fENET	T	If run ENET (Step 8.5)
fSVRM	T	If run svmRadial.RMSE (Step 8.7)
fNN	T	If run Neural Networks (Step 8.8)
fRF	T	If run Random Forest (Step 8.9)
fRFRFE	T	If run Random Forest RFE (Step 8.10)
fSVMRFE	T	If run Random Forest (Step 8.11)
RFE_SVM_C	1;5;10;15;20	Values of C for SVM RFE
RFE_SVM_epsilon	0.01;0.1;0.3	Values of epsilon for SVM RFE
cutoff	0.9	Cut-off for correlated features (default = 0.9)
iScaling	1	Type of scaling: 1 = normalization; 2 = standardization; 3 = other; any other: no scaling
iScalCol	1	Scaling columns: 1 = including dependent variable; 2: only all the features
trainFrac	0.75	Fraction of training set from the entire dataset; the rest of dataset is the test set
iSplitTimes	10	Number of splitting the dataset into train and test (default = 10)
noYrand	0	Number of Y-Randomization (default = 100)
CVtypes	repeatedcv;LOOCV	Cross-validation types: 10-CV (repeatedcv) and LOOCV
NoNAValFile	ds.NoNA.csv	Dataset without NA values (if fDet is True)
No0NearVarFile	ds.No0Var.csv	Dataset without zero near features from Step 3 (if fDet is True)
ScaledFile	ds.scaled.csv	Scaled dataset file from Step 4 (if fDet is True)
NoCorrFile	ds.scaled.NoCorrs.csv	Dataset after correction removal in Step 5 (if fDet is True)
lmFile	LM.details.csv	LM output file with details
glmFile	GLM.details.csv	GLM output file with details
plsFile	PLS.details.csv	PLS output file with details
lassoFile	Lasso.details.csv	Lasso output file with details
svrmFile	SVMRadial.details.csv	SVM Radial output file with details
nnFile	NN.details.csv	NN output file with details
rfFile	RF.details.csv	RF output
rfrfeFile	RFRFE.details.csv	RF-RFE output
svmrfeFile	SVMRFE.details.csv	SVM-RFE output
enetFile	ENET.details.csv	ENET output
fR2rule	T	Best model rule: R2 (default = T) or adjR2 (F)
