# Supplementary material for: A methodology for the design of experiments in computational intelligence with multiple regression models
Source: PeerJ. 2016 Dec 1;4:e2721. doi: 10.7717/peerj.2721 (PMC5136129; doi:10.7717/peerj.2721)
Supplement: Data S1 — Datailed results from UC Irvine Machine Learning Repository (Housing, Machine CPU, Wine Quality, Automobile and Parkinson) and the 3 Use Cases (Protein Corona, Gajewicz Metal Oxides and Aquatic Toxicity) [file peerj-04-2721-s001.zip › 3_winequality/RRegrsResAllSplits.csv]

	RegrMeth	Split.No	CVtype	NoModelFeats	ModelFeats	adjR2.tr	RMSE.tr	R2.tr	RMSEsd.tr	R2sd.tr	adjR2.ts	RMSE.ts	R2.ts	corP.ts	adjR2.both	RMSE.both	R2.both
1	svmRFE	10	repeatedcv	11	V2+V4+V7+V12+V9+V3+V10+V8+V11+V5+V6	0.471439197643317	0.126862896286574	0.374956319629885	0.00814527331543027	0.0553999537158703	0.351883737027456	0.133336402810317	0.369796498064386	0.608108952461963	0.442863547456703	0.120612454396753	0.446698654451682
2	rfRFE	10	repeatedcv	11	V12+V11+V3+V8+V9+V2+V4+V6+V7+V10+V5	0.930965253106809	0.115787124033013	0.482423234468786	0.00919448908780063	0.0709483269452866	0.497442862982144	0.119371739079624	0.511332633100728	0.715075263941305	0.816500431609042	0.0746048143662378	0.817763570064799
3	rf	10	repeatedcv	11	V2+V3+V4+V5+V6+V7+V8+V9+V10+V11+V12	0.933748754824456	0.115728882824356	0.479679831177897	0.00972810392331128	0.0727103715056791	0.495503400464233	0.119397116595708	0.509446773818237	0.713755401953804	0.818052719061865	0.0738913986179846	0.819305172184718
4	nnet	10	LOOCV	11	V2+V3+V4+V5+V6+V7+V8+V9+V10+V11+V12	0.460115529055208	0.127363643099234	0.366451655714979	NA	NA	0.36721644012931	0.131991333331289	0.384705432990057	0.620246268017839	0.439242417607163	0.120517339068441	0.443102451027889
5	nnet	10	repeatedcv	11	V2+V3+V4+V5+V6+V7+V8+V9+V10+V11+V12	0.457619113525726	0.128106817357081	0.362952840622101	0.00981710577309917	0.0755105284292133	0.369259446753354	0.131683713487525	0.386691974606904	0.621845619592921	0.438044918184419	0.120628822568964	0.441913194717568
6	svmRadial	10	LOOCV	11	V2+V3+V4+V5+V6+V7+V8+V9+V10+V11+V12	0.498896223590886	0.124524531682923	0.391099065343924	0	0	0.386660417885612	0.130303301598419	0.403612014376211	0.635304662643216	0.472639325897677	0.117204039623841	0.476269468210021
7	svmRadial	10	repeatedcv	11	V2+V3+V4+V5+V6+V7+V8+V9+V10+V11+V12	0.498896223590886	0.124288833210429	0.396773699344849	0.00932253352994482	0.0592114461077429	0.386660417885612	0.130303301598419	0.403612014376211	0.635304662643216	0.472639325897677	0.117204039623841	0.476269468210021
8	glmnet	10	LOOCV	9	V3+V4+V5+V6+V7+V8+V10+V11+V12	0.345718969951167	0.129648375791909	0.336953843886872	NA	NA	0.369879835678091	0.133153207964957	0.384128784117531	0.619781238920259	0.354473225125055	0.129585253336872	0.358108857774538
9	glmnet	10	repeatedcv	9	V3+V4+V5+V6+V7+V8+V10+V11+V12	0.34725948440039	0.129307167243552	0.345546346910339	0.0082404519768426	0.0621338940394203	0.368361582527572	0.133119514442183	0.382644863324687	0.61858294781273	0.35517333216341	0.12942744923158	0.358805021782014
10	lasso.RMSE	10	repeatedcv	9	V3+V4+V5+V6+V7+V8+V10+V11+V12	0.347563155699766	0.129272233127342	0.345859652581368	0.00825754982506976	0.062350030953113	0.36774418002985	0.133138309799401	0.382041422189979	0.618094994470897	0.355226448994329	0.129403811525101	0.358857839456814
11	pls	10	LOOCV	11	V2+V3+V4+V5+V6+V7+V8+V9+V10+V11+V12	0.314052703691643	0.13214886064625	0.311162264136082	NA	NA	0.351891701527619	0.13424863819044	0.369804242440172	0.608115320017653	0.327487246902892	0.132011742066525	0.332116558720206
12	pls	10	repeatedcv	11	V2+V3+V4+V5+V6+V7+V8+V9+V10+V11+V12	0.314052703691643	0.131765949887558	0.320115156702153	0.00830421377874231	0.0608048423513226	0.351891701527619	0.13424863819044	0.369804242440172	0.608115320017653	0.327487246902892	0.132011742066525	0.332116558720206
13	glmStepAIC	10	LOOCV	11	V2+V3+V4+V5+V6+V7+V8+V9+V10+V11+V12	0.34668726063867	0.130475808895654	0.328880586171751	0	0	0.361113276750973	0.133309339076384	0.378770950006599	0.615443701736072	0.353655834641653	0.129418847522117	0.358105012250503
14	glmStepAIC	10	repeatedcv	11	V2+V3+V4+V5+V6+V7+V8+V9+V10+V11+V12	0.34668726063867	0.129210641647345	0.346545312095636	0.00822093728275248	0.062083591569751	0.361113276750973	0.133309339076384	0.378770950006599	0.615443701736072	0.353655834641653	0.129418847522117	0.358105012250503
15	lm	10	LOOCV	11	V2+V3+V4+V5+V6+V7+V8+V9+V10+V11+V12	0.347068485393344	0.129776254411236	0.335877831611302	0	0	0.36222213296968	0.133211966148903	0.379849159445392	0.616319040307366	0.354192910040057	0.129366055502596	0.358638390634274
16	lm	10	repeatedcv	11	V2+V3+V4+V5+V6+V7+V8+V9+V10+V11+V12	0.347068485393344	0.129484807098194	0.344106339834446	0.0083746441095682	0.0627208676035231	0.36222213296968	0.133211966148903	0.379849159445392	0.616319040307366	0.354192910040057	0.129366055502596	0.358638390634274
17	svmRFE	9	repeatedcv	11	V9+V4+V12+V2+V3+V7+V10+V5+V8+V11+V6	0.472704457028279	0.129066738350635	0.375972774020882	0.00731757225851796	0.0710850733214963	0.339248018553364	0.129127443990167	0.357510007990331	0.597921406198449	0.444691984731388	0.120423249890743	0.448514505487304
18	rfRFE	9	repeatedcv	11	V12+V11+V3+V8+V9+V6+V2+V4+V7+V10+V5	0.930451439890873	0.11638592719906	0.49155057371057	0.00688050948281611	0.0568102349825676	0.442078794348059	0.118407939228766	0.457498727167585	0.676386522017984	0.813128339644131	0.0743072515488407	0.814414690247332
19	rf	9	repeatedcv	11	V2+V3+V4+V5+V6+V7+V8+V9+V10+V11+V12	0.933835051271513	0.116000622471036	0.492505545107465	0.00969666761400199	0.0655569373097513	0.448091756014681	0.117787469130442	0.463345501451461	0.680694866626347	0.816997786401383	0.0732967864839062	0.818257501263451
20	nnet	9	LOOCV	11	V2+V3+V4+V5+V6+V7+V8+V9+V10+V11+V12	0.428026185142733	0.12673745326916	0.389692314697731	NA	NA	0.321199271191466	0.130338675850584	0.339960095354516	0.583060970529254	0.406224341513919	0.124038332433253	0.410311658312008
21	nnet	9	repeatedcv	11	V2+V3+V4+V5+V6+V7+V8+V9+V10+V11+V12	0.448777151614217	0.128456386332754	0.379562281625116	0.00991919342379307	0.0705674944789909	0.316131719746172	0.131243323441421	0.33503260186374	0.578820008175029	0.419753756716955	0.122640394935242	0.423747942371594
22	svmRadial	9	LOOCV	11	V2+V3+V4+V5+V6+V7+V8+V9+V10+V11+V12	0.494859157936784	0.125703549733438	0.39967922743724	0	0	0.352175719365413	0.126675057372105	0.370080410538731	0.608342346494744	0.464055489511589	0.117946914801484	0.467744719558756
23	svmRadial	9	repeatedcv	11	V2+V3+V4+V5+V6+V7+V8+V9+V10+V11+V12	0.494859157936784	0.125790790680342	0.402696790256423	0.00864114478994782	0.0605494075691025	0.352175719365413	0.126675057372105	0.370080410538731	0.608342346494744	0.464055489511589	0.117946914801484	0.467744719558756
24	glmnet	9	LOOCV	11	V2+V3+V4+V5+V6+V7+V8+V9+V10+V11+V12	0.368601301880345	0.129570632427216	0.359484421211916	NA	NA	0.286301287905029	0.13351838664499	0.306026629194086	0.553196736427544	0.353237963106988	0.129437652297552	0.357690017178216
25	glmnet	9	repeatedcv	11	V2+V3+V4+V5+V6+V7+V8+V9+V10+V11+V12	0.36843787753844	0.129227592855252	0.367144890737019	0.00870705739782494	0.0670814764392374	0.287013580409996	0.133431241446923	0.306719235222786	0.553822385989214	0.353286827236472	0.12943262221627	0.357738544946358
26	lasso.RMSE	9	repeatedcv	11	V2+V3+V4+V5+V6+V7+V8+V9+V10+V11+V12	0.368234587041195	0.129221128100102	0.367006138050533	0.00863254239829598	0.0667039290214536	0.287740220159292	0.133359737283716	0.307425791963935	0.554459910150351	0.353317078217173	0.129429617611274	0.357768587691273
27	pls	9	LOOCV	11	V2+V3+V4+V5+V6+V7+V8+V9+V10+V11+V12	0.334647615707267	0.132265497581843	0.332520516064054	NA	NA	0.281397666746339	0.134138696880391	0.30125853525335	0.548870235350169	0.326305068459911	0.132121237686743	0.330942517926082
28	pls	9	repeatedcv	11	V2+V3+V4+V5+V6+V7+V8+V9+V10+V11+V12	0.334647615707267	0.131878506133665	0.340628610825038	0.00895515370073614	0.0684190657559004	0.281397666746339	0.134138696880391	0.30125853525335	0.548870235350169	0.326305068459911	0.132121237686743	0.330942517926082
29	glmStepAIC	9	LOOCV	11	V2+V3+V4+V5+V6+V7+V8+V9+V10+V11+V12	0.367612673873117	0.12947832766986	0.360452055452129	0	0	0.275557982622847	0.134592490977417	0.295580249434778	0.543672925052166	0.349872078473917	0.129784588595329	0.354347301963771
30	glmStepAIC	9	repeatedcv	11	V2+V3+V4+V5+V6+V7+V8+V9+V10+V11+V12	0.367612673873117	0.129515092773328	0.364455104091206	0.00878903736005516	0.0669653082469387	0.275557982622847	0.134592490977417	0.295580249434778	0.543672925052166	0.349872078473917	0.129784588595329	0.354347301963771
31	lm	9	LOOCV	11	V2+V3+V4+V5+V6+V7+V8+V9+V10+V11+V12	0.368868272984601	0.129547827275582	0.359804149372399	0	0	0.283036372263342	0.13388732774897	0.302851949914355	0.550319861457276	0.352635030262095	0.129508026855036	0.357091234684571
32	lm	9	repeatedcv	11	V2+V3+V4+V5+V6+V7+V8+V9+V10+V11+V12	0.368868272984601	0.12915781707975	0.367930043973702	0.00876070669325526	0.0671618603561926	0.283036372263342	0.13388732774897	0.302851949914355	0.550319861457276	0.352635030262095	0.129508026855036	0.357091234684571
33	svmRFE	8	repeatedcv	11	V9+V4+V2+V3+V12+V10+V7+V11+V5+V8+V6	0.478446945006054	0.130443967419931	0.362033971275936	0.00533792596519978	0.051722648840086	0.3527780374556	0.124612239791085	0.370666081646525	0.60882352257984	0.450852677816833	0.119445189554006	0.454632790798069
34	rfRFE	8	repeatedcv	11	V12+V11+V3+V8+V9+V4+V2+V6+V10+V7+V5	0.930070736455371	0.119836495594886	0.46364113514681	0.00745217165973203	0.0575485286130764	0.494682316852171	0.111182765047256	0.508648383471834	0.713195894177634	0.829272520744403	0.071905155685346	0.830447741189842
35	rf	8	repeatedcv	11	V2+V3+V4+V5+V6+V7+V8+V9+V10+V11+V12	0.931764875481375	0.11857407334753	0.475610659258044	0.00999668544668051	0.0678166124731427	0.491464083063803	0.111223495475508	0.505519095843446	0.710998660929433	0.829684103245558	0.0713791547552729	0.830856490519838
36	nnet	8	LOOCV	11	V2+V3+V4+V5+V6+V7+V8+V9+V10+V11+V12	0.450642152445461	0.129662786064251	0.370082576309212	NA	NA	0.374122693826507	0.123548600880911	0.391420810328789	0.625636324336103	0.435124393571699	0.121028164691093	0.439012773841231
37	nnet	8	repeatedcv	11	V2+V3+V4+V5+V6+V7+V8+V9+V10+V11+V12	0.444094089470356	0.131305876545032	0.361813677042377	0.0101511833661487	0.0711323436467821	0.369301526538032	0.124016367409188	0.386732891382458	0.621878518187	0.428950376989415	0.12168274260728	0.43288125674731
38	svmRadial	8	LOOCV	11	V2+V3+V4+V5+V6+V7+V8+V9+V10+V11+V12	0.594776612413109	0.124638188082527	0.420128915757241	NA	NA	0.347374354023557	0.127281051993639	0.365411746249037	0.60449296625274	0.535804263860719	0.109948189186122	0.538999603721503
39	svmRadial	8	repeatedcv	11	V2+V3+V4+V5+V6+V7+V8+V9+V10+V11+V12	0.594776612413109	0.125521261341211	0.41690925636545	0.00931670779727489	0.061440892902763	0.347374354023557	0.127281051993639	0.365411746249037	0.60449296625274	0.535804263860719	0.109948189186122	0.538999603721503
40	glmnet	8	LOOCV	8	V3+V5+V6+V8+V9+V10+V11+V12	0.354249131294771	0.13172381146878	0.346115966505886	NA	NA	0.34239473440535	0.127507147573856	0.35561293069871	0.596332902579348	0.352310646185539	0.12977682305359	0.355553146079479
41	glmnet	8	repeatedcv	11	V2+V3+V4+V5+V6+V7+V8+V9+V10+V11+V12	0.35444455745725	0.131447656213155	0.353252677189201	0.00888201392795505	0.0635727975812286	0.337188877417357	0.127391079814024	0.355507777790244	0.596244729779848	0.352616379525043	0.129582655521593	0.357072712331817
42	lasso.RMSE	8	repeatedcv	9	V3+V4+V5+V6+V8+V9+V10+V11+V12	0.35391559371004	0.131387800704966	0.353812794206177	0.0088485404390136	0.0637521442644332	0.34067837253413	0.127482280341787	0.355587655567278	0.596311710070562	0.352078539902257	0.129742915995832	0.355727659514823
43	pls	8	LOOCV	11	V2+V3+V4+V5+V6+V7+V8+V9+V10+V11+V12	0.323600692840804	0.134199316776432	0.321292281851818	NA	NA	0.310540803445107	0.130278713572069	0.329596208375016	0.574104701578916	0.322134846303486	0.132590522864753	0.326801001929682
44	pls	8	repeatedcv	11	V2+V3+V4+V5+V6+V7+V8+V9+V10+V11+V12	0.323600692840804	0.133800325742896	0.330170345476788	0.00941244848092425	0.0634766697540974	0.310540803445107	0.130278713572069	0.329596208375016	0.574104701578916	0.322134846303486	0.132590522864753	0.326801001929682
45	glmStepAIC	8	LOOCV	11	V2+V3+V4+V5+V6+V7+V8+V9+V10+V11+V12	0.354285196044282	0.132127454602743	0.342297326757774	0	0	0.334166032210281	0.127533559855977	0.352568478556228	0.593774770899057	0.352015488020556	0.12960807413576	0.356475957126797
46	glmStepAIC	8	repeatedcv	11	V2+V3+V4+V5+V6+V7+V8+V9+V10+V11+V12	0.354285196044282	0.131722302906455	0.350504046840817	0.00890082705094981	0.0636195847131537	0.334166032210281	0.127533559855977	0.352568478556228	0.593774770899057	0.352015488020556	0.12960807413576	0.356475957126797
47	lm	8	LOOCV	11	V2+V3+V4+V5+V6+V7+V8+V9+V10+V11+V12	0.354997702132102	0.131845037137577	0.345062159142698	0	0	0.338239593894782	0.127190228614383	0.356529454365027	0.597100874530449	0.353423666156724	0.129469582525181	0.357874441921602
48	lm	8	repeatedcv	11	V2+V3+V4+V5+V6+V7+V8+V9+V10+V11+V12	0.354997702132102	0.131512033146266	0.352662807514039	0.00895122711488787	0.0640925015554078	0.338239593894782	0.127190228614383	0.356529454365027	0.597100874530449	0.353423666156724	0.129469582525181	0.357874441921602
49	svmRFE	7	repeatedcv	11	V2+V7+V4+V8+V9+V5+V3+V12+V11+V10+V6	0.464493933069882	0.127409825775752	0.378061367663493	0.00862158555220717	0.048977290783117	0.36619676341696	0.129164129292646	0.383713938297395	0.619446477346829	0.443028680700003	0.12031331624132	0.446862650983044
50	rfRFE	7	repeatedcv	11	V12+V11+V3+V8+V9+V6+V2+V4+V7+V10+V5	0.931466357757313	0.116770658782917	0.482947538814752	0.0111314312052959	0.0548316240972453	0.502907898518276	0.115652412306891	0.516646624941137	0.718781347101563	0.822616350014233	0.0733905364533771	0.8238373889065
51	rf	7	repeatedcv	11	V2+V3+V4+V5+V6+V7+V8+V9+V10+V11+V12	0.933100324966094	0.117175286085524	0.475108428694979	0.0103409821655085	0.0596815777287619	0.501483377800378	0.115510118999428	0.51526147539886	0.717817160145159	0.823316943503736	0.0726912873350651	0.824533159787502
52	nnet	7	LOOCV	11	V2+V3+V4+V5+V6+V7+V8+V9+V10+V11+V12	0.495302833415617	0.129252880829423	0.362867487126634	NA	NA	0.355171428381803	0.130409633540044	0.372993323577281	0.610731793488173	0.463071249249706	0.117925725160838	0.466767254417574
53	nnet	7	repeatedcv	11	V2+V3+V4+V5+V6+V7+V8+V9+V10+V11+V12	0.351640293141214	0.129879815659859	0.349097310304719	0.00932185001646934	0.0586484371981435	0.352875619346982	0.130978852704187	0.37076096655096	0.608901442395204	0.355882041166493	0.129218987217314	0.360315894450078
54	svmRadial	7	LOOCV	11	V2+V3+V4+V5+V6+V7+V8+V9+V10+V11+V12	0.606035337848334	0.124744930294044	0.401194377562732	NA	NA	0.390884451120491	0.126895880286483	0.407719302973945	0.638529014982048	0.552159101736162	0.107760286680206	0.555241861361257
55	svmRadial	7	repeatedcv	11	V2+V3+V4+V5+V6+V7+V8+V9+V10+V11+V12	0.606035337848334	0.124710085512782	0.405994557923826	0.00986330687309288	0.0708272600107419	0.390884451120491	0.126895880286483	0.407719302973945	0.638529014982048	0.552159101736162	0.107760286680206	0.555241861361257
56	glmnet	7	LOOCV	9	V3+V4+V5+V6+V7+V8+V10+V11+V12	0.352125275905401	0.130171802899015	0.34198776570435	NA	NA	0.35270123020433	0.131188680151534	0.367338639571569	0.606084680198707	0.355457676231093	0.129305842799801	0.35908776441252
57	glmnet	7	repeatedcv	9	V3+V4+V5+V6+V7+V8+V10+V11+V12	0.35106263024812	0.12990101571669	0.349289493773072	0.00931682172761535	0.0586642199215807	0.352668192185899	0.131358275008362	0.367306348644007	0.606058040656179	0.354621298458847	0.129450430799686	0.358256097153384
58	lasso.RMSE	7	repeatedcv	9	V3+V4+V5+V6+V7+V8+V10+V11+V12	0.351008398241621	0.129837373174998	0.349616599761332	0.00931097956037834	0.0585628149557322	0.352544612390703	0.131349657745519	0.367185563366792	0.605958384187225	0.354550687035713	0.129448115044708	0.358185883416614
59	pls	7	LOOCV	11	V2+V3+V4+V5+V6+V7+V8+V9+V10+V11+V12	0.315661829311016	0.133021938078521	0.312788125915481	NA	NA	0.342947995618213	0.132465838125253	0.361107724382534	0.600922394642215	0.325421140396344	0.132212249734676	0.330064674473715
60	pls	7	repeatedcv	11	V2+V3+V4+V5+V6+V7+V8+V9+V10+V11+V12	0.315661829311016	0.132613584625788	0.321995200604525	0.00991060393295802	0.0616390275148771	0.342947995618213	0.132465838125253	0.361107724382534	0.600922394642215	0.325421140396344	0.132212249734676	0.330064674473715
61	glmStepAIC	7	LOOCV	11	V2+V3+V4+V5+V6+V7+V8+V9+V10+V11+V12	0.349962369793407	0.132199751916147	0.322068071189574	0	0	0.343412471041248	0.13161509074552	0.361559362545133	0.601298064644427	0.352516058827794	0.129488768672015	0.356973082202572
62	glmStepAIC	7	repeatedcv	11	V2+V3+V4+V5+V6+V7+V8+V9+V10+V11+V12	0.349962369793407	0.130095936426733	0.347135377110193	0.00926948200048001	0.0579671282147212	0.343412471041248	0.13161509074552	0.361559362545133	0.601298064644427	0.352516058827794	0.129488768672015	0.356973082202572
63	lm	7	LOOCV	11	V2+V3+V4+V5+V6+V7+V8+V9+V10+V11+V12	0.351381270021807	0.130419450053558	0.339629111621952	0	0	0.345506969808307	0.131452851499215	0.363595973155313	0.602989198207823	0.354002687573679	0.129342671610864	0.358449477584123
64	lm	7	repeatedcv	11	V2+V3+V4+V5+V6+V7+V8+V9+V10+V11+V12	0.351381270021807	0.130042473951701	0.347766490737515	0.00929293135830247	0.0589608559271372	0.345506969808307	0.131452851499215	0.363595973155313	0.602989198207823	0.354002687573679	0.129342671610864	0.358449477584123
65	svmRFE	6	repeatedcv	11	V12+V8+V3+V4+V10+V9+V2+V5+V7+V11+V6	0.470875022784872	0.127998539557147	0.366211428094595	0.011938275936277	0.0687463422657245	0.409670527848954	0.125289644714959	0.425986166526496	0.652676157467465	0.459060409024066	0.118645797240442	0.462784023229782
66	rfRFE	6	repeatedcv	11	V12+V11+V3+V8+V9+V6+V2+V4+V7+V10+V5	0.928293071984016	0.119150054477698	0.450100236703325	0.0129588371340964	0.0837243473829264	0.534405544474059	0.112921994098631	0.547273732943369	0.739779516439438	0.827698316553956	0.0728067516377337	0.828884373198453
67	rf	6	repeatedcv	11	V2+V3+V4+V5+V6+V7+V8+V9+V10+V11+V12	0.929982646237838	0.119339514035282	0.449611848846044	0.0103285175485259	0.0608928794022365	0.529963091315654	0.112920166332858	0.542954061153664	0.736854165458582	0.827547588359378	0.0720898476323602	0.828734682557154
68	nnet	6	LOOCV	11	V2+V3+V4+V5+V6+V7+V8+V9+V10+V11+V12	0.407655778470211	0.130193291871631	0.344431427822677	NA	NA	0.399218268886757	0.126383406826741	0.415822789093405	0.644843228307008	0.40987843106558	0.123611671072688	0.413940594556368
69	nnet	6	repeatedcv	11	V2+V3+V4+V5+V6+V7+V8+V9+V10+V11+V12	0.423392985923099	0.130600018895803	0.347113571465945	0.0105660124318962	0.0664208402202798	0.404929074132158	0.125747329486309	0.421375758012928	0.649134622411197	0.423011677465586	0.122229286451417	0.426983436882281
70	svmRadial	6	LOOCV	11	V2+V3+V4+V5+V6+V7+V8+V9+V10+V11+V12	0.564150249414132	0.126787610096769	0.382213899851243	NA	NA	0.427748979720993	0.123734338324207	0.443564962693528	0.666006728714904	0.531602450390847	0.110256680780085	0.534826713873764
71	svmRadial	6	repeatedcv	11	V2+V3+V4+V5+V6+V7+V8+V9+V10+V11+V12	0.473914951570171	0.126774563926986	0.3812870739355	0.00902721938941636	0.0667863912272774	0.43126083021543	0.123343863480992	0.446979751993395	0.668565443313813	0.466946234755422	0.117821782602404	0.470615566055604
72	glmnet	6	LOOCV	7	V3+V6+V7+V8+V10+V11+V12	0.337543323803087	0.13103793694357	0.330534561774909	NA	NA	0.383645534967826	0.129366045525528	0.394485940131708	0.628081157281213	0.352073747103776	0.129862121252145	0.354911972241619
73	glmnet	6	repeatedcv	9	V3+V4+V5+V6+V7+V8+V10+V11+V12	0.338730904774813	0.130672330098038	0.337469624151093	0.010031577341692	0.0626172677787478	0.386080489115904	0.128516625054439	0.399963091120821	0.632426352329519	0.354383162726478	0.129431108981255	0.358019302610997
74	lasso.RMSE	6	repeatedcv	7	V3+V6+V7+V8+V10+V11+V12	0.338124598474762	0.130602226071871	0.338087336189984	0.0100713576430423	0.0626937015265124	0.384894507456053	0.129171795391149	0.395712945767128	0.629057187994166	0.352821510313845	0.129755318268013	0.355656459893196
75	pls	6	LOOCV	11	V2+V3+V4+V5+V6+V7+V8+V9+V10+V11+V12	0.307692893898609	0.133499655740452	0.305006741360001	NA	NA	0.340075242042306	0.132812641472993	0.358314368518523	0.598593658936113	0.320461639175736	0.132670873927182	0.325139312498056
76	pls	6	repeatedcv	11	V2+V3+V4+V5+V6+V7+V8+V9+V10+V11+V12	0.307692893898609	0.133000789587318	0.313190609531288	0.0101629175218488	0.0589563303869133	0.340075242042306	0.132812641472993	0.358314368518523	0.598593658936113	0.320461639175736	0.132670873927182	0.325139312498056
77	glmStepAIC	6	LOOCV	11	V2+V3+V4+V5+V6+V7+V8+V9+V10+V11+V12	0.337361943062697	0.130930712057225	0.331564002727582	0	0	0.383486409622532	0.128347819151175	0.400525729959598	0.63287102158307	0.353521516181488	0.129402113972121	0.357971618385496
78	glmStepAIC	6	repeatedcv	11	V2+V3+V4+V5+V6+V7+V8+V9+V10+V11+V12	0.337361943062697	0.130620322319285	0.337679822114566	0.0100759274820553	0.0620644198597504	0.383486409622532	0.128347819151175	0.400525729959598	0.63287102158307	0.353521516181488	0.129402113972121	0.357971618385496
79	lm	6	LOOCV	11	V2+V3+V4+V5+V6+V7+V8+V9+V10+V11+V12	0.337970922434734	0.131396702680863	0.326929223779502	0	0	0.38523639218263	0.128172371061921	0.402227346167532	0.63421395929728	0.354407428882072	0.129313825512463	0.358851432813422
80	lm	6	repeatedcv	11	V2+V3+V4+V5+V6+V7+V8+V9+V10+V11+V12	0.337970922434734	0.130849306253902	0.335610518964746	0.0101329678050695	0.0627292094442822	0.38523639218263	0.128172371061921	0.402227346167532	0.63421395929728	0.354407428882072	0.129313825512463	0.358851432813422
81	svmRFE	5	repeatedcv	11	V2+V4+V12+V7+V9+V3+V5+V8+V11+V10+V6	0.456724565246796	0.132507720167209	0.343163325628926	0.00886327895190437	0.0544935175947938	0.466322642537202	0.113306825994645	0.481072519250998	0.693593915234986	0.462777850318488	0.118314860388899	0.466475875128561
82	rfRFE	5	repeatedcv	11	V12+V11+V3+V8+V9+V2+V4+V6+V5+V7+V10	0.930578360730196	0.119704280670207	0.468907479745688	0.00879068874779593	0.0582807358304297	0.541100503957369	0.105856998653155	0.553783655858045	0.744166416776546	0.839380939553803	0.0704457019787155	0.840486577641981
83	rf	5	repeatedcv	11	V2+V3+V4+V5+V6+V7+V8+V9+V10+V11+V12	0.932533858791749	0.119941631242183	0.464769319649568	0.00981022900129875	0.0633353484873687	0.53722193745841	0.105957007061766	0.550012285920615	0.741628131829298	0.839611040361134	0.0698307891618615	0.840715094526358
84	nnet	5	LOOCV	11	V2+V3+V4+V5+V6+V7+V8+V9+V10+V11+V12	0.341285101891197	0.13298347055617	0.333080588147099	NA	NA	0.378291498401524	0.122261549043391	0.395474396686909	0.628867550989005	0.354466272814376	0.129320036651719	0.358909871687368
85	nnet	5	repeatedcv	11	V2+V3+V4+V5+V6+V7+V8+V9+V10+V11+V12	0.34187571011234	0.132638892241321	0.339110428603141	0.00950474778695484	0.0611275431788524	0.377512996291253	0.122315706940313	0.394717410966621	0.628265398511346	0.354734109992559	0.129281713046193	0.359175865180345
86	svmRadial	5	LOOCV	11	V2+V3+V4+V5+V6+V7+V8+V9+V10+V11+V12	0.458962221491129	0.129871419724195	0.366275807577649	0	0	0.461787200849124	0.114489410771031	0.476662428966359	0.690407436928629	0.463156361755284	0.1183327618627	0.466851781042325
87	svmRadial	5	repeatedcv	11	V2+V3+V4+V5+V6+V7+V8+V9+V10+V11+V12	0.458962221491129	0.12988377221843	0.369313860960383	0.00977306062694269	0.0657532867122822	0.461787200849124	0.114489410771031	0.476662428966359	0.690407436928629	0.463156361755284	0.1183327618627	0.466851781042325
88	glmnet	5	LOOCV	8	V2+V3+V5+V6+V8+V10+V11+V12	0.340304028990812	0.133017661285574	0.332755311268425	NA	NA	0.375977872490105	0.123006037934771	0.388521030832012	0.623314552077851	0.352044112798395	0.129752747924953	0.355287947027189
89	glmnet	5	repeatedcv	10	V2+V3+V5+V6+V7+V8+V9+V10+V11+V12	0.340501136430381	0.132752734572734	0.338163643254801	0.00949225129266641	0.0614137517996124	0.374445833126558	0.122930521261545	0.390163274505287	0.62463051038617	0.352593655828589	0.129698457610318	0.356645009671964
90	lasso.RMSE	5	repeatedcv	9	V2+V3+V5+V6+V7+V8+V10+V11+V12	0.340627339457907	0.132690096465646	0.338620732766209	0.0093977676221413	0.0612763607576098	0.374668712091745	0.122921710323291	0.388809369356002	0.623545803735381	0.352357985505425	0.129622582245611	0.356005531269162
91	pls	5	LOOCV	11	V2+V3+V4+V5+V6+V7+V8+V9+V10+V11+V12	0.310348391524389	0.135447863374049	0.308172443708149	NA	NA	0.349674313351084	0.125009780797952	0.367648138861481	0.606339953212289	0.324261377084896	0.132278617075067	0.328912894514224
92	pls	5	repeatedcv	11	V2+V3+V4+V5+V6+V7+V8+V9+V10+V11+V12	0.310348391524389	0.135022003792238	0.315324208534448	0.00970129062627127	0.0626275062119769	0.349674313351084	0.125009780797952	0.367648138861481	0.606339953212289	0.324261377084896	0.132278617075067	0.328912894514224
93	glmStepAIC	5	LOOCV	11	V2+V3+V4+V5+V6+V7+V8+V9+V10+V11+V12	0.339712908047806	0.132907782193346	0.333944639394216	0	0	0.368839190240443	0.123154434778457	0.386283333223747	0.621516961332309	0.351057161230878	0.129629280900288	0.355524227079727
94	glmStepAIC	5	repeatedcv	11	V2+V3+V4+V5+V6+V7+V8+V9+V10+V11+V12	0.339712908047806	0.132887871372544	0.336848720702112	0.00955835023079042	0.0617349618911444	0.368839190240443	0.123154434778457	0.386283333223747	0.621516961332309	0.351057161230878	0.129629280900288	0.355524227079727
95	lm	5	LOOCV	11	V2+V3+V4+V5+V6+V7+V8+V9+V10+V11+V12	0.34145410034853	0.133101867274539	0.332076607841696	0	0	0.374280280076686	0.122608509396338	0.391574041180094	0.625758772355685	0.353667686669225	0.129367459759354	0.358116782693405
96	lm	5	repeatedcv	11	V2+V3+V4+V5+V6+V7+V8+V9+V10+V11+V12	0.34145410034853	0.132797415799734	0.337737149386079	0.00951846662711603	0.0613034351777189	0.374280280076686	0.122608509396338	0.391574041180094	0.625758772355685	0.353667686669225	0.129367459759354	0.358116782693405
97	svmRFE	4	repeatedcv	11	V2+V12+V9+V10+V3+V4+V7+V5+V8+V11+V6	0.499519022315889	0.124879509922403	0.418814636354532	0.00767908948868304	0.0514790055657088	0.228009365271708	0.138994900090691	0.249345789849625	0.499345361297795	0.433221330846519	0.121639244883424	0.4371228110472
98	rfRFE	4	repeatedcv	11	V12+V11+V3+V8+V9+V2+V6+V4+V7+V10+V5	0.930395325452583	0.115973741473704	0.500084117151532	0.00744728117270377	0.0423068860134535	0.376888114787891	0.122987811916602	0.394109800057572	0.627781649984748	0.796881057805746	0.0759187085043331	0.798279248271413
99	rf	4	repeatedcv	11	V2+V3+V4+V5+V6+V7+V8+V9+V10+V11+V12	0.932605041481565	0.11552005511132	0.501694870007338	0.00829612264289601	0.0646593217775858	0.379293530094247	0.122768520759731	0.396448734036365	0.629641750550553	0.798655168538907	0.0752559030474847	0.800041146727939
100	nnet	4	LOOCV	11	V2+V3+V4+V5+V6+V7+V8+V9+V10+V11+V12	0.415381695209007	0.125876141164833	0.400874889298006	NA	NA	0.234140824426584	0.137639566796812	0.255307786565548	0.505279909125178	0.373150849524541	0.127410297674387	0.377465831161105
101	nnet	4	repeatedcv	11	V2+V3+V4+V5+V6+V7+V8+V9+V10+V11+V12	0.415851142947222	0.126755285294213	0.397188933218066	0.00794223788024886	0.0693764231518397	0.234154948937447	0.137640899221574	0.255321520700482	0.50529349956286	0.373491406447609	0.127374839797452	0.377804043825004
102	svmRadial	4	LOOCV	11	V2+V3+V4+V5+V6+V7+V8+V9+V10+V11+V12	0.524516691406295	0.123183954116754	0.428436139759561	0	0	0.270985073501748	0.135497644988791	0.291133727249187	0.539568093246058	0.461880945408216	0.118239422701301	0.465585144156971
103	svmRadial	4	repeatedcv	11	V2+V3+V4+V5+V6+V7+V8+V9+V10+V11+V12	0.524516691406295	0.123358754756161	0.430443892428849	0.00899736343729272	0.0558655883660583	0.270985073501748	0.135497644988791	0.291133727249187	0.539568093246058	0.461880945408216	0.118239422701301	0.465585144156971
104	glmnet	4	LOOCV	9	V2+V3+V5+V6+V7+V8+V10+V11+V12	0.387847520442529	0.128135737448982	0.37913054082388	NA	NA	0.239367137013161	0.137058085796742	0.256567377633466	0.506524804558934	0.353819435750697	0.12943507363641	0.357458750568121
105	glmnet	4	repeatedcv	10	V2+V3+V4+V5+V6+V7+V8+V10+V11+V12	0.388468757637265	0.127986792648092	0.385966764286628	0.00802811661584515	0.0701722196450917	0.239019390681053	0.137163811142411	0.258139506493087	0.50807431197915	0.354627626353193	0.129347556003128	0.358666251970507
106	lasso.RMSE	4	repeatedcv	9	V2+V3+V5+V6+V7+V8+V10+V11+V12	0.388694761377751	0.127926429041898	0.38621707528926	0.00807691042066429	0.0701580987498999	0.240338030871201	0.137158996921915	0.257516316605269	0.507460655228825	0.354671715167587	0.129372734720518	0.358306229913201
107	pls	4	LOOCV	11	V2+V3+V4+V5+V6+V7+V8+V9+V10+V11+V12	0.354673090376868	0.130883648348739	0.352231642643152	NA	NA	0.217075712692483	0.138800911781204	0.238714323648218	0.488583998559325	0.324852382272209	0.132274511435706	0.329499831455567
108	pls	4	repeatedcv	11	V2+V3+V4+V5+V6+V7+V8+V9+V10+V11+V12	0.354673090376868	0.130649948047145	0.359579021748329	0.0081558259942363	0.0710317663320954	0.217075712692483	0.138800911781204	0.238714323648218	0.488583998559325	0.324852382272209	0.132274511435706	0.329499831455567
109	glmStepAIC	4	LOOCV	11	V2+V3+V4+V5+V6+V7+V8+V9+V10+V11+V12	0.387447752461759	0.127813908307963	0.382314439513734	0	0	0.238305379931218	0.137139054075006	0.259357241289903	0.509271284572282	0.354297790075077	0.129374128573001	0.358742548716613
110	glmStepAIC	4	repeatedcv	11	V2+V3+V4+V5+V6+V7+V8+V9+V10+V11+V12	0.387447752461759	0.127830508616734	0.38713688356512	0.00809492170255255	0.0700819074502152	0.238305379931218	0.137139054075006	0.259357241289903	0.509271284572282	0.354297790075077	0.129374128573001	0.358742548716613
111	lm	4	LOOCV	11	V2+V3+V4+V5+V6+V7+V8+V9+V10+V11+V12	0.388230893000042	0.128311140131615	0.377620876518671	0	0	0.238840332233211	0.137164088979691	0.259877408478022	0.509781726308448	0.354877355645481	0.129321226802724	0.359318124786845
112	lm	4	repeatedcv	11	V2+V3+V4+V5+V6+V7+V8+V9+V10+V11+V12	0.388230893000042	0.128101306431241	0.38481485791891	0.00819827775002244	0.0705571911673782	0.238840332233211	0.137164088979691	0.259877408478022	0.509781726308448	0.354877355645481	0.129321226802724	0.359318124786845
113	svmRFE	3	repeatedcv	11	V4+V2+V7+V9+V12+V10+V8+V3+V6+V5+V11	0.444504754263365	0.129757892905998	0.375242213976875	0.006974098871156	0.0558224133888102	0.359577733856734	0.122826694935835	0.377277846740091	0.614229474007957	0.427754416468377	0.122133441634353	0.431693528745504
114	rfRFE	3	repeatedcv	11	V12+V11+V3+V8+V9+V6+V2+V4+V10+V7+V5	0.931607360247849	0.118171131549701	0.48738070506865	0.00863305767642925	0.0769296677710349	0.471240577201869	0.111504795376861	0.4858545310983	0.697032661428645	0.824944684742392	0.0717823701616094	0.826149696299235
115	rf	3	repeatedcv	11	V2+V3+V4+V5+V6+V7+V8+V9+V10+V11+V12	0.93354067611398	0.118287611086808	0.482121063523414	0.00882571216509872	0.0711854648951189	0.474501018907176	0.111088182046247	0.489024860093159	0.699303124612753	0.826810454264384	0.0710839488439351	0.828002622601738
116	nnet	3	LOOCV	11	V2+V3+V4+V5+V6+V7+V8+V9+V10+V11+V12	0.357291235807363	0.131463799096313	0.352288794626402	NA	NA	0.325581818052034	0.125971764061116	0.344221516548084	0.586703942843479	0.354532393349484	0.129285460398619	0.358975537074863
117	nnet	3	repeatedcv	11	V2+V3+V4+V5+V6+V7+V8+V9+V10+V11+V12	0.373088718359174	0.131439006643476	0.356954395051731	0.00692815634347428	0.0641180450518004	0.330529774922738	0.125479479621884	0.349032720841959	0.590789912610193	0.367680318110266	0.127966561508978	0.372032956721522
118	svmRadial	3	LOOCV	11	V2+V3+V4+V5+V6+V7+V8+V9+V10+V11+V12	0.494553335596935	0.127077183171908	0.397878833810578	0	0	0.382196290493365	0.121937045229685	0.399271267389277	0.63187915568507	0.469913838268685	0.117570233996945	0.473562741759952
119	svmRadial	3	repeatedcv	11	V2+V3+V4+V5+V6+V7+V8+V9+V10+V11+V12	0.494553335596935	0.126932978848286	0.402177401341914	0.00944615966218665	0.0588835019489007	0.382196290493365	0.121937045229685	0.399271267389277	0.63187915568507	0.469913838268685	0.117570233996945	0.473562741759952
120	glmnet	3	LOOCV	9	V2+V3+V6+V7+V8+V9+V10+V11+V12	0.355716092830576	0.131941513677384	0.347571973989291	NA	NA	0.32842769504598	0.125986404578661	0.343614003449463	0.586185980256661	0.353177771305326	0.12951389378354	0.356820700002605
121	glmnet	3	repeatedcv	11	V2+V3+V4+V5+V6+V7+V8+V9+V10+V11+V12	0.356097081786755	0.131788243901799	0.353895378783887	0.00683362096138179	0.0641209959711326	0.324259998743299	0.126039429088837	0.342936229933811	0.585607573323476	0.353317261682427	0.129442184437177	0.357768769893624
122	lasso.RMSE	3	repeatedcv	11	V2+V3+V4+V5+V6+V7+V8+V9+V10+V11+V12	0.354960352686816	0.131783995934626	0.353420986487033	0.00682672281434823	0.0646540587148326	0.325282645355582	0.125964441891727	0.343930612443744	0.586455976560683	0.352692727586672	0.129474078435383	0.357148534843584
123	pls	3	LOOCV	11	V2+V3+V4+V5+V6+V7+V8+V9+V10+V11+V12	0.325964361105337	0.13437180543378	0.323360970426964	NA	NA	0.299080923926174	0.128561717919668	0.318453059194546	0.56431645306029	0.324387457385748	0.132278764824562	0.329038106928149
124	pls	3	repeatedcv	11	V2+V3+V4+V5+V6+V7+V8+V9+V10+V11+V12	0.325964361105337	0.134121766079304	0.330444569355741	0.00695096046607808	0.0618685876030421	0.299080923926174	0.128561717919668	0.318453059194546	0.56431645306029	0.324387457385748	0.132278764824562	0.329038106928149
125	glmStepAIC	3	LOOCV	11	V2+V3+V4+V5+V6+V7+V8+V9+V10+V11+V12	0.354980674104253	0.132217359241168	0.345062701662207	0	0	0.329831968098028	0.125602539068912	0.348354200135519	0.590215384529681	0.353798058075477	0.129361078539558	0.358246256674456
126	glmStepAIC	3	repeatedcv	11	V2+V3+V4+V5+V6+V7+V8+V9+V10+V11+V12	0.354980674104253	0.132136471154751	0.350187978443756	0.00691598900613475	0.0636517627917793	0.329831968098028	0.125602539068912	0.348354200135519	0.590215384529681	0.353798058075477	0.129361078539558	0.358246256674456
127	lm	3	LOOCV	11	V2+V3+V4+V5+V6+V7+V8+V9+V10+V11+V12	0.35704939756062	0.131997822338313	0.347220763007703	0	0	0.325644723395138	0.126016661799675	0.344282683301302	0.586756067971438	0.354392542019166	0.129302919454408	0.358836648425792
128	lm	3	repeatedcv	11	V2+V3+V4+V5+V6+V7+V8+V9+V10+V11+V12	0.35704939756062	0.131775012817736	0.353907680298894	0.00695280614638135	0.0637860442473771	0.325644723395138	0.126016661799675	0.344282683301302	0.586756067971438	0.354392542019166	0.129302919454408	0.358836648425792
129	svmRFE	2	repeatedcv	11	V2+V10+V7+V11+V4+V9+V12+V8+V3+V5+V6	0.448586542207286	0.125106708488117	0.380036661704254	0.00741159974540891	0.0558025370516385	0.36102960190979	0.138737174655147	0.378689587786655	0.615377597728951	0.429570098660121	0.123434986415624	0.433496712499131
130	rfRFE	2	repeatedcv	8	V12+V11+V3+V8+V9+V6+V2+V4	0.92288962062075	0.115027537098237	0.474966686157575	0.00766283216180222	0.0440205257884486	0.476178585873882	0.126234210408997	0.486707659524658	0.697644364647675	0.797321590349529	0.0779537058482097	0.798336250723249
131	rf	2	repeatedcv	11	V2+V3+V4+V5+V6+V7+V8+V9+V10+V11+V12	0.931348707273026	0.114436682821909	0.478019703653501	0.0090621451631536	0.061862668306077	0.480687765587984	0.125276420818502	0.495040616287814	0.703591228120287	0.805479790539482	0.0761262556454592	0.806818790729761
132	nnet	2	LOOCV	11	V2+V3+V4+V5+V6+V7+V8+V9+V10+V11+V12	0.44509299707175	0.126658991896301	0.357492514706113	NA	NA	0.361850472309881	0.135838007456861	0.379487770813879	0.616025787458511	0.427541045014047	0.121772018586592	0.431481626055878
133	nnet	2	repeatedcv	11	V2+V3+V4+V5+V6+V7+V8+V9+V10+V11+V12	0.457404780859648	0.126944177516082	0.360771501960111	0.00969256712725054	0.0640091821905791	0.379620879082879	0.133842340489032	0.396767035691141	0.629894463931174	0.441602621142863	0.120284013387512	0.445446407855897
134	svmRadial	2	LOOCV	11	V2+V3+V4+V5+V6+V7+V8+V9+V10+V11+V12	0.625784533472145	0.122050673164593	0.412532882280411	NA	NA	0.338696971505345	0.138633515467932	0.35697419088585	0.597473171687106	0.548454353062854	0.108143438419099	0.551562614712609
135	svmRadial	2	repeatedcv	11	V2+V3+V4+V5+V6+V7+V8+V9+V10+V11+V12	0.590441328223133	0.122537162994045	0.405778295653228	0.00819611779931211	0.0649082080841048	0.351783129107444	0.136972932504	0.369698670765279	0.608028511473992	0.527546202241518	0.110644605924827	0.530798387332471
136	glmnet	2	LOOCV	9	V2+V3+V5+V6+V7+V8+V10+V11+V12	0.349583103257385	0.127808934598446	0.340828310474123	NA	NA	0.340504278934933	0.140194645623141	0.355417498758012	0.596169018616375	0.350371994082817	0.130102041867405	0.354030725029784
137	glmnet	2	repeatedcv	11	V2+V3+V4+V5+V6+V7+V8+V9+V10+V11+V12	0.351975050249509	0.127496794993385	0.34878555339673	0.00813851150656014	0.0596097472417397	0.346287936085089	0.139020710376568	0.364355354937008	0.603618550855595	0.354454099747521	0.129485073756058	0.358897782415092
138	lasso.RMSE	2	repeatedcv	10	V2+V3+V4+V5+V6+V7+V8+V10+V11+V12	0.350900729543842	0.127408472368471	0.349208612356208	0.00811675739977549	0.0594186328795086	0.343708669390069	0.139476637743302	0.360198401314941	0.600165311655832	0.3525853822786	0.129729153779019	0.356636787896381
139	pls	2	LOOCV	11	V2+V3+V4+V5+V6+V7+V8+V9+V10+V11+V12	0.322450359266651	0.129834239111135	0.319725010386368	NA	NA	0.308762748239594	0.142440458851381	0.327867295398801	0.572596974667873	0.323358783918098	0.132461943773748	0.328016514441816
140	pls	2	repeatedcv	11	V2+V3+V4+V5+V6+V7+V8+V9+V10+V11+V12	0.322450359266651	0.129478922993833	0.327152401729972	0.00815659987912053	0.0574429180437832	0.308762748239594	0.142440458851381	0.327867295398801	0.572596974667873	0.323358783918098	0.132461943773748	0.328016514441816
141	glmStepAIC	2	LOOCV	11	V2+V3+V4+V5+V6+V7+V8+V9+V10+V11+V12	0.350932510506774	0.127689961487108	0.34217493368965	0	0	0.34743575154258	0.138661957713284	0.365471446851705	0.604542344961629	0.353979906558643	0.129446379851015	0.358426853384585
142	glmStepAIC	2	repeatedcv	11	V2+V3+V4+V5+V6+V7+V8+V9+V10+V11+V12	0.350932510506774	0.127621817198372	0.34725753469599	0.00828958864985503	0.0596836621172956	0.34743575154258	0.138661957713284	0.365471446851705	0.604542344961629	0.353979906558643	0.129446379851015	0.358426853384585
143	lm	2	LOOCV	11	V2+V3+V4+V5+V6+V7+V8+V9+V10+V11+V12	0.352277214118505	0.127817966906081	0.340898222059023	0	0	0.347631971963482	0.138630172174385	0.365662244095144	0.604700127414526	0.355013971403948	0.129342145990144	0.359453800136461
144	lm	2	repeatedcv	11	V2+V3+V4+V5+V6+V7+V8+V9+V10+V11+V12	0.352277214118505	0.127484162565783	0.348911726707329	0.00829570007161606	0.05986876791719	0.347631971963482	0.138630172174385	0.365662244095144	0.604700127414526	0.355013971403948	0.129342145990144	0.359453800136461
145	svmRFE	1	repeatedcv	11	V2+V7+V4+V9+V12+V10+V11+V8+V3+V5+V6	0.466201023891785	0.126093443546756	0.385441658074374	0.0102050189473314	0.0700320185101896	0.385263063095877	0.128097389256797	0.402253279944986	0.634234404573724	0.448931049975791	0.119837948764847	0.452724390683091
146	rfRFE	1	repeatedcv	11	V12+V11+V3+V8+V9+V2+V4+V6+V7+V10+V5	0.928049448347656	0.11862022865116	0.455556178517168	0.00992116727234368	0.0694069909766663	0.533490742664027	0.112645295725419	0.546384214600448	0.739178066909759	0.826238032553038	0.07261195023254	0.827434141215063
147	rf	1	repeatedcv	11	V2+V3+V4+V5+V6+V7+V8+V9+V10+V11+V12	0.930263105844543	0.118902359017037	0.452508063218667	0.0105540140855458	0.072234041533418	0.529826334936698	0.112779152828279	0.542821084473623	0.736763927234242	0.826603082672621	0.072010539984736	0.827796678473998
148	nnet	1	LOOCV	11	V2+V3+V4+V5+V6+V7+V8+V9+V10+V11+V12	0.506011487843635	0.127988812776381	0.367995890896241	NA	NA	0.341019920702464	0.135350021992607	0.359232937969481	0.599360440777902	0.463312923611209	0.118143381393242	0.467007265188353
149	nnet	1	repeatedcv	11	V2+V3+V4+V5+V6+V7+V8+V9+V10+V11+V12	0.43418292301928	0.129140953518498	0.357563791292748	0.00897637276833	0.0639460298562621	0.379770080295894	0.129419653500653	0.39691211325254	0.630009613619142	0.423871746620011	0.122178114881992	0.4278375856608
150	svmRadial	1	LOOCV	11	V2+V3+V4+V5+V6+V7+V8+V9+V10+V11+V12	0.487482598932867	0.125448377997562	0.387299248994337	0	0	0.416991787427667	0.125359405866734	0.433105079734942	0.658107194714465	0.47381018827841	0.117126365270218	0.477432270837194
151	svmRadial	1	repeatedcv	11	V2+V3+V4+V5+V6+V7+V8+V9+V10+V11+V12	0.487482598932867	0.125484172216418	0.389733596082092	0.00925804458170205	0.0683244185754333	0.416991787427667	0.125359405866734	0.433105079734942	0.658107194714465	0.47381018827841	0.117126365270218	0.477432270837194
152	glmnet	1	LOOCV	9	V2+V3+V6+V7+V8+V9+V10+V11+V12	0.34336286986885	0.130411455437612	0.33438128331586	NA	NA	0.363667236733661	0.131478220992199	0.37805667107888	0.61486313198864	0.353138823956344	0.129763102386574	0.356781972006652
153	glmnet	1	repeatedcv	10	V2+V3+V5+V6+V7+V8+V9+V10+V11+V12	0.343939168189971	0.130044777672332	0.342631203453593	0.00902953305471721	0.062461734380555	0.362310510820454	0.13127100495207	0.378332859794814	0.615087684639202	0.35367581968215	0.129578045080586	0.357720401536454
154	lasso.RMSE	1	repeatedcv	8	V2+V3+V6+V7+V8+V10+V11+V12	0.343925296482804	0.130000316713656	0.342938864555663	0.00897167801525448	0.0621750716322031	0.3664734803563	0.131130078164014	0.379207681756173	0.615798409998088	0.353830934624705	0.129593911433595	0.357065823562754
155	pls	1	LOOCV	11	V2+V3+V4+V5+V6+V7+V8+V9+V10+V11+V12	0.314286061937578	0.132582226156329	0.311937066688665	NA	NA	0.321565901552584	0.134831949680143	0.340316592715703	0.583366602331418	0.32194800411437	0.132520104781379	0.326615445888301
156	pls	1	repeatedcv	11	V2+V3+V4+V5+V6+V7+V8+V9+V10+V11+V12	0.314286061937578	0.132131524018049	0.321485035416525	0.0094363226415392	0.0660616153474356	0.321565901552584	0.134831949680143	0.340316592715703	0.583366602331418	0.32194800411437	0.132520104781379	0.326615445888301
157	glmStepAIC	1	LOOCV	11	V2+V3+V4+V5+V6+V7+V8+V9+V10+V11+V12	0.343427621811675	0.129985027854247	0.338682181292996	0	0	0.361760885110616	0.130840856524886	0.379400659642735	0.615955079240958	0.353573259239986	0.129396475995294	0.358023005265243
158	glmStepAIC	1	repeatedcv	11	V2+V3+V4+V5+V6+V7+V8+V9+V10+V11+V12	0.343427621811675	0.129884462730812	0.343802803564483	0.009033351258084	0.0612579424918434	0.361760885110616	0.130840856524886	0.379400659642735	0.615955079240958	0.353573259239986	0.129396475995294	0.358023005265243
159	lm	1	LOOCV	11	V2+V3+V4+V5+V6+V7+V8+V9+V10+V11+V12	0.344226581177537	0.130499545803359	0.333582255700237	0	0	0.362433258070519	0.130773947609916	0.380054449430379	0.616485563034836	0.354330061297327	0.129320933425519	0.358774597796532
160	lm	1	repeatedcv	11	V2+V3+V4+V5+V6+V7+V8+V9+V10+V11+V12	0.344226581177537	0.130150527512669	0.341430786712054	0.00914489647454862	0.0623950466258744	0.362433258070519	0.130773947609916	0.380054449430379	0.616485563034836	0.354330061297327	0.129320933425519	0.358774597796532
