# Supplementary material for: A methodology for the design of experiments in computational intelligence with multiple regression models
Source: PeerJ. 2016 Dec 1;4:e2721. doi: 10.7717/peerj.2721 (PMC5136129; doi:10.7717/peerj.2721)
Supplement: Data S1 — Datailed results from UC Irvine Machine Learning Repository (Housing, Machine CPU, Wine Quality, Automobile and Parkinson) and the 3 Use Cases (Protein Corona, Gajewicz Metal Oxides and Aquatic Toxicity) [file peerj-04-2721-s001.zip › 3_winequality/RRegrsResBest.csv]

Averaged values for all spits:
RegrMeth	CVtype	adjR2.tr.Avg	RMSE.tr.Avg	R2.tr.Avg	RMSEsd.tr.Avg	R2sd.tr.Avg	adjR2.ts.Avg	RMSE.ts.Avg	R2.ts.Avg	corP.ts.Avg	adjR2.both.Avg	RMSE.both.Avg	R2.both.Avg	NoModelFeats.Avg
1	rf	repeatedcv	0.932272304228614	0.117390671804299	0.475162933313692	0.00966391797560211	0.065993522341914	0.486803629564326	0.115470765004847	0.500987448847724	0.707104841746046	0.821275867694845	0.0727655911508066	0.822506133937246	11
RRegr package | eNanoMapper
Regression method: rf
Split no.: 10
CV type: repeatedcv
Training Set Summary:
net.c	V2	V3	V4	V5	V6	V7	V8	V9	V10	V11	V12
	Min. :0.0000	Min. :0.0000	Min. :0.0000	Min. :0.0000	Min. :0.00000	Min. :0.00000	Min. :0.00000	Min. :0.00000	Min. :0.0000	Min. :0.0000	Min. :0.0000	Min. :0.0000
	1st Qu.:0.4000	1st Qu.:0.2212	1st Qu.:0.1849	1st Qu.:0.1000	1st Qu.:0.06849	1st Qu.:0.09683	1st Qu.:0.08451	1st Qu.:0.05654	1st Qu.:0.4060	1st Qu.:0.3622	1st Qu.:0.1317	1st Qu.:0.1692
	Median :0.6000	Median :0.2920	Median :0.2740	Median :0.2600	Median :0.08904	Median :0.11352	Median :0.18310	Median :0.11307	Median :0.4868	Median :0.4409	Median :0.1737	Median :0.2615
	Mean :0.5255	Mean :0.3306	Mean :0.2776	Mean :0.2719	Mean :0.11128	Mean :0.12757	Mean :0.20947	Mean :0.14206	Mean :0.4896	Mean :0.4483	Mean :0.1975	Mean :0.3113
	3rd Qu.:0.6000	3rd Qu.:0.4071	3rd Qu.:0.3493	3rd Qu.:0.4200	3rd Qu.:0.11644	3rd Qu.:0.13189	3rd Qu.:0.28169	3rd Qu.:0.19788	3rd Qu.:0.5679	3rd Qu.:0.5197	3rd Qu.:0.2395	3rd Qu.:0.4154
	Max. :1.0000	Max. :1.0000	Max. :1.0000	Max. :1.0000	Max. :1.00000	Max. :1.00000	Max. :0.94366	Max. :0.96113	Max. :1.0000	Max. :1.0000	Max. :1.0000	Max. :1.0000
Test Set Summary:
net.c	V2	V3	V4	V5	V6	V7	V8	V9	V10	V11	V12
	Min. :0.0000	Min. :0.0531	Min. :0.0274	Min. :0.0000	Min. :0.00000	Min. :0.04341	Min. :0.00000	Min. :0.00000	Min. :0.0000	Min. :0.1102	Min. :0.03593	Min. :0.09231
	1st Qu.:0.4000	1st Qu.:0.2212	1st Qu.:0.1849	1st Qu.:0.0800	1st Qu.:0.06849	1st Qu.:0.09683	1st Qu.:0.08451	1st Qu.:0.06007	1st Qu.:0.4086	1st Qu.:0.3858	1st Qu.:0.13174	1st Qu.:0.16923
	Median :0.6000	Median :0.2920	Median :0.2740	Median :0.2400	Median :0.08904	Median :0.11018	Median :0.16901	Median :0.11307	Median :0.4941	Median :0.4567	Median :0.17365	Median :0.27692
	Mean :0.5323	Mean :0.3248	Mean :0.2845	Mean :0.2681	Mean :0.11514	Mean :0.12123	Mean :0.20961	Mean :0.14581	Mean :0.4922	Mean :0.4538	Mean :0.19361	Mean :0.31093
	3rd Qu.:0.6000	3rd Qu.:0.4071	3rd Qu.:0.3630	3rd Qu.:0.4400	3rd Qu.:0.11644	3rd Qu.:0.12855	3rd Qu.:0.29577	3rd Qu.:0.20495	3rd Qu.:0.5749	3rd Qu.:0.5197	3rd Qu.:0.23952	3rd Qu.:0.40000
	Max. :1.0000	Max. :0.7788	Max. :0.8288	Max. :0.7800	Max. :0.89041	Max. :0.75459	Max. :1.00000	Max. :1.00000	Max. :0.9200	Max. :0.8189	Max. :0.76647	Max. :0.86154
Predictors:
x
1	V2
2	V3
3	V4
4	V5
5	V6
6	V7
7	V8
8	V9
9	V10
10	V11
11	V12
Trainig Results:
x
1	NA
Test Results:
x
1	NA
Full Statistics:
RegrMeth	Split.No	CVtype	NoModelFeats	ModelFeats	adjR2.tr	RMSE.tr	R2.tr	RMSEsd.tr	R2sd.tr	adjR2.ts	RMSE.ts	R2.ts	corP.ts	adjR2.both	RMSE.both	R2.both
1	rf	10	repeatedcv	11	V2+V3+V4+V5+V6+V7+V8+V9+V10+V11+V12	0.933748754824456	0.115701447614758	0.479933020075262	0.00974945949082789	0.0725894596491844	0.495503400464233	0.119397116595708	0.509446773818237	0.713755401953804	0.818052719061865	0.0738913986179846	0.819305172184718
V12
	x
1	6.14977028182435
V11
	x
1	3.99971999828552
V3
	x
1	3.70049751859112
V8
	x
1	2.37813856770545
V9
	x
1	2.20323825831828
V4
	x
1	1.93694389243415
V2
	x
1	1.85644163780185
V6
	x
1	1.84429828478971
V10
	x
1	1.82590852591381
V5
	x
1	1.61324908709694
V7
	x
1	1.43519921390495
Residuals of the fitted model:
resids
2	0.0165429687499996
3	0.0661519607843141
5	0.0326266195524141
6	0.0363119266055043
7	0.0239382716049378
8	-0.381367370892019
9	-0.312125693160813
10	0.0475722543352601
11	0.0506793650793649
13	0.0285349940688016
14	0.089138991389914
16	0.0142364824717759
18	0.0376585059635903
20	-0.0940321583178726
21	-0.148706022659511
22	0.112126225490196
23	0.0664044943820228
24	0.0398685782556748
25	-0.102099213551119
26	0.0614207650273225
27	0.103735144312394
30	-0.0825302061122957
31	0.0466547406082287
32	-0.107012121212121
33	0.0237112763320936
34	-0.174385026737968
35	0.0658703703703706
36	-0.153674446439258
37	-0.0698214285714285
39	0.140480324074073
41	0.0776846679081318
42	0.213055082339579
43	-0.0573015873015873
44	0.146261261261261
45	0.0144909090909086
46	0.35073050951504
47	0.0196391076115481
48	0.108655913978495
49	0.0333212121212117
50	0.0786572438162546
51	0.0930857142857142
52	-0.138049382716049
54	0.0197659817351591
58	0.0130364873222008
60	-0.157480122324159
61	0.0822816399286989
62	0.0106857142857135
66	-0.00543019943019979
68	0.123516548463357
69	0.207649425287357
70	-0.0506832694763729
71	-0.16557984213722
73	0.0187999999999994
74	0.217127525252525
76	0.0645487364620941
77	0.0587990626830697
79	0.0188929001203363
80	0.22795523290986
81	0.0492542372881354
83	0.0398198198198195
86	0.15733950617284
87	-0.0858997050147492
88	0.0674911032028472
90	-0.0132993774759487
91	0.0273298429319366
92	-0.0887174833635813
93	0.106782449725777
94	0.0704945054945058
95	0.189551045510455
96	-0.12661231884058
98	0.0971732872769142
99	-0.00572665429808283
101	-0.0966777777777778
102	-0.0626881720430107
103	-0.0886116322701688
104	0.0139421894218935
105	0.0277734877734873
106	0.0137082601054473
107	0.0512327044025156
108	0.0680075901328276
109	-0.0988630952380952
110	0.0137446286065063
111	0.0542557251908397
112	0.0318867924528298
114	-0.0690141712877387
116	-0.0747864768683274
117	-0.0985003035822707
118	-0.190697819314643
119	-0.0341522712731923
120	-0.190102286401926
121	0.0118121212121209
122	-0.0352444444444442
123	-0.0163940520446104
126	0.0331223628691978
127	-0.223339517625231
129	-0.242015503875969
130	0.067498565691337
132	0.206502347417841
134	-0.117121212121212
136	0.025565423327412
137	0.0542806394316163
138	0.0739082568807342
139	0.020804195804195
140	0.0256838365896974
141	0.0254584092289004
143	0.0495451713395642
144	0.0655990068280574
145	0.0463658686310624
146	0.0157380952380944
147	0.0371256454388981
148	0.0247272727272722
149	-0.0941850490196078
150	-0.101001697792869
151	-0.0957875457875458
152	0.273220338983051
153	0.0339732402559623
154	0.0391265253692998
155	0.00935849056603688
156	0.00977657004830834
157	0.00875675675675586
159	0.0139896373056988
160	-0.158177623990773
161	0.0237781840341252
163	-0.0935722411831627
164	0.0257247706422013
165	0.0202659574468078
167	0.029769277474195
168	0.224965859714463
169	-0.121005484460694
170	0.0373062730627303
171	0.170504854368932
172	-0.0541830065359477
173	-0.055968992248062
175	0.0217765222849963
176	0.106655031995346
177	0.0232200357781748
178	-0.116377358490566
180	0.0248673587081885
181	0.0253333333333329
182	0.00715389185977322
183	0.0181501831501826
184	0.0650350541746338
188	0.0084923439340393
189	0.0193310063990685
191	0.0140917107583765
193	0.0298664343786288
194	0.0321473158551806
195	0.0309890109890104
196	0.0148098001289483
197	0.113428401663696
200	0.181355439208843
201	-0.180890538033395
202	0.0299823321554767
204	0.0804778353483019
205	-0.169775757575758
207	-0.133059033989266
208	0.0334570191713046
209	0.0410716300056397
211	0.083554256010397
212	-0.130048221820373
214	0.0729062870699883
215	-0.13402701043585
217	0.1241381495564
220	0.0172732958098805
221	-0.125232704402515
222	0.0541620284477428
223	0.0841153846153847
224	-0.104118357487923
226	-0.0403942652329746
228	0.0705330764290305
229	-0.0415749525616697
234	0.0551804281345565
236	-0.115368043087971
241	0.0512418300653594
243	-0.180288288288289
244	-0.0802965599050994
245	-0.0831941923774943
246	-0.077068345323741
247	0.0267545511613304
248	0.015009310986964
250	-0.0755014492753623
251	0.0203542061986087
252	-0.0513185459026493
253	0.117014134275618
255	-0.0492085499711148
256	0.0400414446417996
257	0.137227036395147
258	0.064322280395579
259	0.0619225967540575
261	0.108165191740413
263	0.145159574468085
264	0.0768330252618609
266	-0.187971552257266
267	0.262694786174575
268	-0.28531690140845
270	-0.00438412142440137
271	-0.0322452830188676
272	-0.00596014492753594
273	0.168817204301075
274	0.0605194805194806
275	0.060889659156557
276	-0.0318853974121994
278	-0.00514104778353452
279	-0.263753648569759
282	-0.241852507374631
284	-0.235674019607843
285	0.01827414330218
286	0.0172727272727266
288	-0.033694996986136
289	-0.210859813084112
290	0.0632318104906938
292	0.181431966726085
294	-0.0715151515151515
295	-0.0233805309734512
296	0.132438438438438
298	0.07503351614869
299	0.0726440879382059
300	0.0660258671369785
302	-0.00966727162734404
304	0.0336374695863744
305	-0.0101997503121105
306	-0.133727664818238
307	0.001496969696969
308	-0.076859649122807
309	-0.0960649819494583
310	-0.115092592592592
313	-0.180746619635509
314	0.00640653357531673
315	0.15783534830167
316	-0.042174432497013
317	0.0536283741368487
319	-0.0876190476190467
320	-0.0866725978647686
321	-0.0868354430379736
323	0.123525641025641
324	-0.14027926322044
325	-0.0323990772779698
326	-0.039136018680677
327	-0.109825545171339
330	0.116231343283582
331	0.0186726726726729
332	0.0148345153664305
333	-0.17956043956044
334	0.0834132841328414
335	-0.13140606060606
336	-0.139329896907216
337	0.112951515151516
338	0.157341849148419
339	-0.0353729372937293
340	-0.175833333333333
341	0.026726943942134
342	0.0707306763285031
343	-0.0386750599520381
344	-0.0385670356703565
346	0.0523985890652556
348	0.102299465240643
349	-0.0130769230769229
351	-0.127349970291146
354	0.265469924812031
356	0.00555354993983181
357	0.222749855574813
360	-0.0346321839080458
362	-0.039808153477218
364	0.210837821663675
365	-0.115506715506715
366	0.137191078963232
367	-0.10898245614035
371	0.0556608639587364
372	-0.0343585237258347
373	0.0397619047619052
374	0.0595176252319111
375	0.0163949275362321
376	-0.0880297397769506
377	-0.00970987654320976
379	0.208914319248827
381	-0.00575014594279011
382	0.0280647130647134
383	-0.00447368421052596
384	-0.00519503546099254
385	0.163298429319372
387	-0.093731343283582
388	-0.174433902593296
389	-0.0932007575757575
390	-0.240255474452555
392	0.0271729957805911
393	0.0192289010321791
397	0.0332469135802465
398	0.00287037037037063
399	0.00105676328502446
400	0.0499239766081869
401	0.0347169811320752
402	-0.0125763125763124
403	-0.0843291592128801
404	-0.0751641414141414
406	0.0523248792270535
407	0.0104601990049753
408	-0.22324427480916
409	0.122220216606499
410	0.251269841269841
411	-0.164665450121655
413	0.0479864947820748
414	-0.0886336866902229
415	0.00716183574879137
416	0.00335213032581377
417	0.0690385722510082
418	0.0595083932853718
420	0.0235021097046411
421	-0.162818003913894
424	-0.0321181147075518
425	0.0496183661299942
426	-0.295581257413998
427	-0.157657320872274
428	-0.126293053123175
429	0.0747965998785673
430	-0.0900632183908046
431	-0.0338681592039785
432	0.0405298829328401
433	0.0768613569321541
434	0.0129949874686709
436	0.0122561340514654
437	-0.0790699126092385
438	0.0746563573883166
442	0.0364909090909095
443	-0.290281509916827
445	-0.140742028985507
446	-0.104869933454325
448	0.198339393939394
450	-0.0033659491193736
452	-0.12270429159318
453	-0.110712603062426
454	-0.107928743961352
456	-0.343653483992466
460	0.478226571767497
461	-0.0275159976730655
462	0.111842267406038
463	0.263489681050657
465	-0.0151964512040554
466	0.18234250764526
467	0.0631404460518392
469	-0.132161505768063
470	0.068419117647059
472	0.0403345498783459
474	0.269981583793739
475	-0.00920691711389365
476	0.067439172749392
479	0.0639545997610515
480	-0.0438228438228436
481	0.196209262435678
482	-0.280227001194742
483	0.0750554582603621
484	0.0776110068792998
485	0.129169675090254
487	0.0796477987421385
488	-0.20154486036839
489	-0.193384223918575
491	-0.0610804174340085
492	-0.0666851168511673
493	-0.0506234567901221
494	0.0354662004662007
496	-0.142985723153319
497	-0.0381055155875297
498	0.124115151515152
499	-0.15164658634538
501	-0.0396969696969695
502	-0.170647653000594
504	-0.0403676470588219
505	-0.0446666666666653
506	-0.0958693045563541
507	-0.0673001230012289
508	-0.110895915678524
509	-0.0740966010733453
510	-0.147218390804597
513	-0.127906388361796
514	-0.0525340768277558
515	-0.0498226950354594
517	0.0891921005386004
518	0.532275819418677
519	0.0754573357888279
520	0.0487141986593539
521	0.0056833642547931
522	0.0525519848771267
523	0.0220582877959922
524	0.00748484848484765
526	0.0889609609609611
527	0.0453416518122399
528	-0.0706726726726726
529	-0.143416815742397
532	0.0692377495462798
533	0.0674985354422967
534	0.043350456621005
537	0.0676297686053786
541	0.0739018087855299
542	0.0557098765432102
544	-0.0425030525030524
545	0.00964075382803331
546	0.0105839416058386
549	-0.013185185185185
550	-0.117273284313725
553	-0.00254504504504482
554	0.0766071428571428
555	0.0308223477714999
556	0.0306949806949803
557	-0.00810185185185153
558	0.0409999999999998
559	-0.01066301703163
560	0.0383612662942274
561	0.0674564676616918
562	0.00531484690929995
563	0.0135224586288407
566	0.0642
567	-0.05410661980082
568	-0.0524770114942528
570	-0.00604473540643735
572	-0.00757410768300038
574	0.232691358024691
575	-0.0262145871006629
576	0.053614163614164
577	0.283861209964413
578	0.0224936386768442
581	0.000186567164178197
582	0.00126092384519272
583	0.00746232670283242
584	-0.19
585	-0.18925786163522
586	-0.0915203562340966
587	-0.168262213976499
588	0.0295856524427948
589	-0.311955974842766
591	0.0408708708708706
592	0.00046329723225047
594	0.0750148544266193
595	0.0299451553930526
597	-0.111032028469751
598	-0.115224242424242
601	0.1908166969147
602	-0.101457975986278
603	-0.0379976442873979
604	-0.100986997635934
605	-0.146690865093769
608	-0.111546149323927
610	-0.0821125074805505
611	0.0833992805755397
612	0.0873880162885399
613	-0.0657257072570725
614	0.160428743961353
615	-0.135189063408958
617	0.0178089887640445
618	0.0336005089058529
620	0.1889486260454
622	0.0347359154929573
624	0.0648160919540235
625	0.116514041514042
627	-0.0102768166089975
628	-0.0137090041741214
629	-0.0563004345127249
630	0.0355871886120992
631	-0.0544943147815679
633	-0.0702337023370233
634	0.255026455026455
635	0.0647526501766786
636	0.0467693236714975
638	-0.0109695926563407
639	-0.350062189054727
640	0.0208229721728835
641	0.0118123543123533
642	0.0134174174174166
643	0.0125203252032511
644	0.0155535499398307
645	0.0125357142857134
646	-0.307906691221608
647	0.104984423676012
649	-0.22546497584541
650	-0.0879901051329622
652	0.0582037037037037
653	0.306881908086097
655	0.0433882783882781
657	0.00724691358024637
658	-0.266212914485166
660	0.241561728395062
661	-0.0841869918699186
662	0.0928100113765643
663	-0.0862589928057553
664	0.0650284414106944
665	0.180561660561661
666	0.0505534591194968
669	0.114502529510961
670	-0.0305976586568082
671	0.132167832167832
672	0.0159396179913736
673	-0.0209769094138554
675	-0.0428666666666664
676	0.180460405156538
677	-0.0420948860135549
678	0.000379353233829871
680	0.0628482587064678
681	0.0431238779174148
682	-0.164139590854393
683	0.0496804511278195
684	0.0360617517328289
685	-0.0080859835100125
686	0.0383043981481478
687	0.0818022598870058
688	0.0755329636475665
689	0.0147013142174428
690	0.141972920696325
691	0.278718411552346
692	-0.00858131487889358
693	0.0584135472370767
695	0.030971973762671
696	-0.00576477757464944
697	-0.0513159420289854
698	-0.0528695114409399
699	0.00752822341057574
700	0.00371198013656127
701	-0.184665471923537
703	-0.101518704634282
704	0.296589008363202
705	0.232838589981447
706	-0.00750000000000067
708	0.0741947565543074
709	0.00276932826362497
711	0.107444831591173
712	0.0306803995006238
713	0.0347645259938835
714	0.0405025996533793
716	-0.185644682115271
719	0.0159124087591234
721	0.0144876126126118
722	0.0114575866188761
723	0.148551810237204
724	0.118456572769953
726	0.0851295045045047
727	-0.00749851455733774
728	0.0394444444444441
729	0.0390151515151511
731	0.0911111111111112
732	-0.000380774032459397
735	0.0792469352014013
736	-0.0114686166971366
737	-0.0114122137404586
738	-0.150958005249344
742	0.0125171339563855
743	0.0946194690265488
744	0.041935275080906
745	0.010221833041447
746	-0.0256400742115025
747	-0.212103030303031
748	0.0563992869875223
749	-0.0434782608695651
750	-0.0222834193918527
751	0.0121999999999992
752	0.0120833333333326
753	0.0841451414514147
754	0.0105027932960886
755	-0.154056152927121
757	-0.246322897483119
758	-0.00645276292335212
759	-0.00882866043613828
760	0.0301732377538824
761	0.0364841849148415
762	0.000261080752883336
763	-0.13063492063492
765	-0.193010033444817
767	0.0339135802469133
768	0.0449051987767582
770	0.0642086330935253
771	-0.177805020431991
772	0.00533464566929054
774	-0.0659451401311866
775	-0.0622631578947368
777	-0.0773018648018647
778	-0.0586452762923351
779	0.141693889897157
780	0.0856308851224107
781	-0.104126186487995
782	0.0236745406824143
784	0.0233395638629278
785	0.0939797211660329
786	0.0103997648442085
787	0.0112116040955622
788	-0.0462644728823886
789	-0.0448406862745097
792	0.019283903675538
793	-0.138834315651604
795	0.0573902728351132
796	0.0928035714285714
797	0.0473408239700372
799	-0.116292203806016
801	0.0296521739130429
802	0.0814015843997563
803	-0.0945028142589108
804	-0.143085585585586
805	-0.0863797313797313
806	-0.0266843971631195
808	-0.0254905660377344
810	-0.121850490196078
811	0.0440579710144926
812	0.0148995271867615
813	0.204681508967223
815	0.00882637628554162
817	-0.0791666666666666
818	0.104894736842106
819	0.0109057301293892
820	0.0443811274509802
821	0.113921568627451
822	-0.00992289442467231
823	0.0186095592799497
824	0.0168804159445399
827	-0.170786052009456
828	0.0905269841269841
830	-0.00972471573907818
832	-0.00905024509803898
833	0.452466076696165
834	0.161260558804419
835	0.00104240282685442
837	-0.0875328554360801
838	-0.0882060606060594
839	-0.10953826691967
840	0.0421613663133096
841	-0.128778173190984
844	0.0516139044072005
845	0.0770076425631987
846	0.00804452466907246
847	0.00987726098191133
848	-0.114810744810745
850	0.0142631246046798
851	0.0252850061957863
852	0.0272674418604646
853	0.0253908045977006
855	0.00923333333333365
856	-0.126056685150954
862	-0.124244604316547
863	0.0836904761904764
864	0.0218988095238088
865	0.0111346266901814
866	0.0133333333333325
867	0.024359441408622
870	-0.0296043165467623
871	0.00740543735224619
874	-0.182346999405823
875	-0.0905431675242984
876	-0.0692330917874384
877	0.409779040404041
878	0.00657142857142878
879	-0.0785996409335727
880	0.0269084628670114
881	0.0333209647495358
883	0.122489819662596
884	0.0270840579710139
885	-0.0784138342277877
886	0.170360520094563
887	-0.0800062656641604
888	-0.13785158587672
889	-0.0467812142038945
890	0.0529899348727059
891	0.128184471687099
892	0.0799696969696972
893	-0.0746205221615057
895	-0.131117571059431
896	-0.00832116788321124
897	-0.0318864468864457
898	-0.00650994575045172
899	-0.0319873015872999
900	0.330958259847148
901	0.28554307116105
902	-0.130501207729468
903	-0.130624242424242
905	-0.303428063943162
906	0.0223695518723137
907	0.137402431222009
908	-0.100874704491726
909	-0.0218345323741004
910	0.0584444444444452
911	0.053979652902454
912	0.0217785843920147
913	0.0274023437500005
916	0.131341991341993
917	0.0627358490566039
918	-0.0283304042179259
919	-0.0216137071651088
920	0.025058072009292
922	-0.0209134045077103
923	0.0282754418037786
924	-0.0313224637681158
925	0.114895061728395
926	-0.20104440275172
927	0.0729609279609289
929	0.11809963099631
930	-0.0383008849557509
931	0.0515308641975308
932	0.048458781362007
933	-0.112452380952381
934	0.0543714821763605
935	0.0504204204204203
937	0.0332515723270445
938	0.329083333333333
940	0.0967207207207207
942	-0.16339222614841
943	-0.281301247771836
945	-0.134854545454545
946	-0.187573149741824
947	-0.112270992366411
949	-0.0256281094527347
950	-0.0253567251461978
951	-0.0284168212739626
954	-0.0969157769869504
955	0.000230496453900941
956	0.158167848699764
959	-0.245512367491166
960	0.166194968553459
961	-0.0138574040219376
963	0.110612121212121
964	0.0609191390343227
965	-0.0140128205128203
966	0.0718155283129019
967	-0.152471698113207
968	0.026320861678004
970	0.0803675538656529
971	0.0642473118279576
972	0.0687777777777784
973	-0.0947540983606547
976	0.0376736775015931
978	0.00138433515482606
979	-0.252954271961492
980	0.129528920691711
982	0.0704394977168952
983	0.0630113636363644
984	-0.0169439421338153
986	-0.104955752212389
988	0.0563586956521739
989	0.0351074278698584
990	-0.0140363210310485
991	0.0351476793248941
992	0.0289571694599623
993	-0.167163904235728
994	0.0326666666666662
996	-0.0927336860670194
998	-0.304913536076327
999	-0.225812274368232
1000	-0.0852737226277371
1001	-0.122204204204204
1002	-0.201902206320811
1003	-0.0256046065259101
1005	0.112319902319902
1006	-0.16719489981785
1007	-0.0240166369578129
1009	-0.116333927510397
1010	0.13208041958042
1011	-0.16786355475763
1012	-0.0602013025458851
1013	-0.0346107055961078
1014	-0.0962049335863377
1015	-0.054925799086758
1016	0.0682565991405777
1017	-0.0693757159221062
1019	0.088759124087592
1020	0.0952127659574468
1021	0.00176258992805778
1022	0.0015764139590857
1023	0.0836868686868688
1024	0.0829891304347834
1025	-0.104538077403245
1026	-0.0893107546048721
1027	0.0497117117117123
1029	-0.0898046181172291
1030	-0.10290944123314
1031	-0.253632398753894
1032	-0.223472750316857
1033	-0.00286151960784375
1034	-0.0516697819314641
1035	-0.191841937539835
1036	-0.180877817319098
1037	-0.148304093567251
1039	-0.0773356401384073
1041	0.0798158379373849
1042	-0.0955412844036697
1043	-0.00698729582577118
1044	-0.159586288416075
1045	-0.0126972477064218
1046	-0.0383454545454543
1049	0.00426504629629654
1050	0.00833648393194741
1051	0.105212895377129
1052	0.0317868145409732
1053	0.179233716475096
1054	-0.0363522012578608
1055	-0.0668844525105868
1056	-0.0656823671497584
1058	0.0262279098110902
1059	-0.13022687609075
1060	-0.203706253585772
1061	0.0561878787878792
1063	0.0404076738609117
1064	0.094168212739642
1065	-0.0305670103092781
1066	-0.0862982768865121
1067	-0.106404428904428
1068	-0.0331833333333328
1069	-0.0360883084577104
1070	0.174745972738538
1071	-0.119145454545454
1073	-0.102337363270006
1074	-0.0832228719948017
1075	0.0507679738562089
1076	-0.231934731934732
1077	0.150051480051481
1080	-0.204126679462572
1081	0.0465494791666671
1083	-0.0481963470319633
1084	0.0792896174863396
1085	-0.0467471264367814
1087	-0.136344086021505
1088	0.000735382760699399
1089	-0.144047619047618
1090	-0.127275803722503
1091	-0.369600477042337
1093	0.0156464811783964
1094	-0.0816178266178255
1095	-0.0746603773584905
1096	0.0702009456264778
1097	-0.0686135693215338
1098	0.013961267605633
1099	-0.0651878787878777
1100	0.0126225490196071
1101	0.14374125874126
1103	-0.101683967704729
1105	0.068115942028986
1106	0.198763339610798
1107	0.0833570159857914
1111	-0.0729084967320262
1113	0.0397912829957032
1114	-0.0747569444444444
1115	0.0568153655514256
1116	-0.00418819188191855
1117	-0.00397412199630287
1118	-0.00418069584736214
1119	-0.0279936507936506
1121	-0.270271519352974
1122	-0.00309259259259231
1124	0.038072360616845
1125	0.413333333333334
1126	-0.181973762671437
1127	0.0157393483709276
1128	-0.0511071849234392
1129	0.11540191118606
1130	-0.0524827586206896
1131	-0.0895840867992767
1132	0.0642718446601944
1135	-0.0652470293933693
1136	0.0282327848872642
1138	0.053709582598472
1139	0.0349938949938946
1140	-0.134359441408621
1141	-0.104701946472019
1142	-0.0230935251798559
1144	0.0140329218106997
1146	-0.0156042031523642
1148	-0.253400735294118
1149	0.0400427350427355
1150	0.0387636363636369
1151	-0.0140236318407947
1152	0.0177642276422768
1153	0.0084481688392295
1154	-0.00317547055251954
1155	-0.0208928571428569
1156	0.00771766169154148
1158	-0.0921792510742776
1160	0.178013165769001
1161	-0.102065404475042
1162	-0.00997549019607824
1163	-0.0466072489601888
1164	0.0502482269503545
1165	0.0529870892018778
1166	0.0792412935323384
1167	0.107244047619048
1168	-0.101885098743267
1169	0.00701291079812238
1170	0.0044444444444447
1171	0.0167436352871524
1172	0.0035735735735738
1173	0.0933579335793366
1175	-0.0865641025641025
1176	0.00999367488931091
1177	0.246500920810313
1178	-0.139318048206936
1179	0.182804232804233
1180	0.0253192735793792
1181	0.0257410768300064
1182	0.209731585518103
1183	-0.0308466548253403
1184	0.0519607843137255
1185	0.133261578604044
1186	-0.00635947712418272
1187	0.0565461121157324
1188	-0.00776769509981823
1191	0.024772182254197
1192	-0.00953163017031688
1194	-0.0126823387582887
1195	-0.168995686999384
1196	-0.153190639269407
1197	-0.178224242424243
1198	-0.177157390783962
1199	-0.00466324200913215
1202	-0.174979054458408
1206	-0.0769498525073734
1208	0.0996678966789667
1209	-0.0813000616142936
1211	-0.0270064440538954
1212	0.0782000000000002
1213	-0.0292543021032502
1214	0.0208666666666669
1217	-0.140516351118761
1218	0.0959168131224377
1219	0.00522988505747157
1220	0.0434750462107213
1221	0.0646293053123183
1223	-0.186947935368044
1224	0.139429097605894
1225	-0.0146779237023137
1226	0.0169905771495871
1227	0.0450120336943439
1229	-0.0638545246277192
1230	0.0982867132867133
1231	0.0697897340754491
1234	0.301619047619048
1236	0.350664183736809
1237	-0.0899415204678362
1238	-0.0761021984551395
1240	0.371592039800995
1243	0.0161565217391308
1244	0.104222222222222
1246	0.0704553734061933
1247	0.0341849148418487
1248	0.064832175925926
1249	0.0357831325301208
1251	-0.0158573141486807
1252	0.0760314579552331
1253	0.0739887005649719
1254	0.0895141451414515
1255	0.215836363636364
1256	0.079258600237248
1257	0.0188743781094522
1259	-0.0104712041884814
1260	-0.0106396063960638
1261	0.0474280575539566
1262	0.212047619047619
1263	0.060444059976932
1265	0.064988221436985
1266	-0.0246393034825868
1267	-0.0237862950058069
1268	0.0642582247051526
1271	0.104342273307791
1272	-0.0554719471947194
1274	0.0329492187499998
1275	-0.0678659286592865
1277	0.458813868613139
1278	-0.146879951249238
1280	-0.156077015643802
1281	-0.0331238779174144
1282	-0.0361570743405273
1283	-0.0325122549019606
1285	0.160597196831201
1286	0.0997385620915032
1288	0.136395061728395
1289	0.0201207729468592
1290	0.0213345633456328
1293	0.0321851851851855
1294	0.206024024024023
1296	0.0215430982519583
1297	0.0204798464491358
1298	0.0228439838802538
1300	0.302579075425791
1301	-0.0143456790123455
1302	-0.0248655409631018
1303	0.0960277275467157
1304	0.216262437810945
1305	0.0122376009227213
1306	0.018821839080459
1307	0.0344367816091949
1308	0.28397201946472
1309	0.0354464285714282
1310	0.0274999999999996
1311	0.0185351787773926
1312	0.00723404255319182
1313	-0.0519109461966611
1314	-0.0655048661800486
1315	-0.0685263157894737
1316	-0.0597912939773404
1317	-0.0228054020871697
1318	0.0616007194244609
1319	-0.0614938271604938
1320	-0.176943462897527
1321	0.0650501474926256
1322	-0.0243404004711423
1323	0.2731541218638
1326	-0.0138161721931352
1327	-0.0143599740090965
1328	-0.0137794773741233
1331	-0.127652752571083
1333	-0.1829386763813
1334	0.0225464684014865
1335	-0.0424380630630639
1337	0.0270531400966179
1339	0.0263497867154169
1340	-0.0170673952641163
1341	-0.0183950617283948
1342	-0.019356197352587
1345	0.135620667926906
1346	-0.113292682926829
1347	0.0536690647482015
1349	-0.0332070707070716
1350	0.114141414141414
1353	0.0452424242424242
1356	0.0888888888888889
1358	-0.0865023474178404
1360	-0.0171334530221422
1362	0.051939393939394
1363	-0.0160942158616575
1364	0.197071428571428
1365	-0.0251295336787563
1366	0.0924798154555941
1367	0.0193369499698608
1370	0.251001788908766
1371	0.0261142147734321
1373	0.0268449197860957
1374	0.0200504095778194
1377	0.0133271719038814
1378	-0.0233097345132741
1380	-0.00852922286448277
1382	-0.0205662580268542
1383	0.00379084967320165
1384	0.0040164452877916
1385	0.0287071078431367
1386	0.00695035460992838
1387	0.0718490083173386
1389	0.162284508740205
1391	-0.00950810185185158
1392	0.13145796590241
1393	0.0236283741368483
1394	0.0523640661938534
1395	0.0419757365684574
1396	-0.156660583941606
1397	0.138548951048951
1398	0.0137323511356653
1400	0.00199194012665538
1402	0.0103085299455526
1403	0.118659147869675
1404	-0.396350941105039
1405	-0.0456484848484848
1406	-0.0734250764525984
1407	0.0599758890898135
1408	-0.0119782732990278
1409	-0.148333333333333
1410	-0.010767857142857
1411	-0.162495201535509
1412	-0.0434810874704491
1413	0.062464307883303
1414	0.0637507453786526
1415	0.163281519861831
1419	0.0139624924379909
1420	0.0254152249134941
1421	0.0150654761904755
1422	0.0946345811051694
1423	0.00608617594254968
1424	0.350692401960784
1427	0.0153873239436623
1430	0.260065359477125
1431	0.152557417752949
1432	-0.14109604519774
1435	-0.0759300873907616
1436	-0.0763564356435643
1437	-0.00120720720720757
1438	-0.032698695136418
1439	-0.000154569892473311
1440	-0.0304997060552613
1441	0.000302469135804229
1442	-0.179701149425288
1444	0.146729776247849
1445	-0.0310990990990988
1447	0.113635307781649
1450	-0.293623962040331
1452	-0.163184357541899
1453	-0.180611010284331
1455	0.00887005649717554
1456	-0.137822878228782
1457	-0.114264705882353
1458	0.0587614155251143
1459	0.15166963755199
1460	-0.072185389809698
1462	0.188227465214761
1463	-0.0351282051282049
1464	-0.0887971274685816
1467	-0.141121495327103
1468	0.192540250447227
1469	-0.134928057553957
1471	0.0390293040293039
1472	0.0996060606060606
1473	0.0364976689976693
1474	0.110325352977287
1475	0.0470022002200217
1476	-0.0311155115511534
1477	0.0471156211562115
1478	-0.0288503649635024
1480	0.081906474820144
1481	0.226755793226381
1482	0.07991975308642
1483	0.314929404542664
1484	0.188954954954955
1485	0.300820987654321
1486	0.0506578947368422
1488	0.200141843971631
1489	0.0186323268206035
1490	-0.0358300907911803
1491	0.0179500891265602
1492	0.0182619047619043
1494	0.0148207885304651
1495	-0.23007393715342
1496	0.00392192192192209
1497	0.0131711711711703
1498	-0.0068641114982575
1499	-0.230301953818829
1500	-0.00866784037558654
1501	0.0229470404984419
1502	0.00477396021699744
1503	0.0468259587020646
1505	-0.0162838633686687
1506	0.427801672640382
1508	-0.0174175824175822
1509	-0.0373064619321817
1510	0.303345259391772
1511	-0.0855517438536305
1512	0.109009958992384
1514	-0.0623492605233219
1515	-0.0755492780916509
1516	-0.0746896992962252
1517	0.0726258992805757
1519	0.122052173913043
1520	0.0802829654782118
1521	-0.00515587529976003
1522	0.230803990610328
1523	0.0761757105943154
1525	-0.0369680196801967
1527	-0.0797476525821595
1528	0.0227676399026767
1529	-0.0819073405535499
1530	-0.0839399509803921
1531	0.0269528920691715
1532	0.0539676840215439
1534	0.0937057057057057
1535	-0.218655816757082
1536	-0.121871890547263
1537	-0.0943491484184914
1540	0.149453652547575
1542	-0.229485749690211
1544	-0.105066413662239
1545	-0.121919540229884
1546	-0.0532898009950249
1547	0.159088771310994
1548	0.0906749555950267
1549	0.0796679438058749
1550	-0.309974009096816
1551	0.00969102792632115
1552	0.0272141119221405
1554	0.0773853989813246
1555	-0.120571428571428
1556	-0.226561728395062
1559	0.046319088319088
1560	0.00454599761051266
1561	0.00466907340553446
1562	0.00461212121212018
1563	0.0228450874020488
1565	0.0232256235827657
1566	-0.00831034482758597
1567	0.0104949314251642
1568	0.0230434782608689
1570	-0.0763453056080655
1572	0.00380952380952404
1573	0.0115092097445031
1574	0.0302550415183871
1577	0.0490336391437314
1579	-0.00295040803515367
1580	0.0794584837545128
1581	0.0585040347610186
1582	0.0814936247723135
1583	0.0815821256038649
1584	0.0742513863216269
1585	-0.0981509433962255
1586	0.104296424452135
1587	0.0418726591760303
1588	-0.0464504504504504
1589	0.0667369654364388
1590	0.050177619893428
1591	0.085888294711825
1592	-0.0823045977011494
1593	-0.00552519732847578
1594	-0.136881720430107
1595	0.151587009803922
1596	0.00216262975778581
1597	-0.00846926713947949
1599	0.00403115264797527
Leverage output:
Mean of hat values: 0.00944150906694182
Leverage / Hat values with warnings (X3 & X2 = values 3 & 2 times than hat mean):
hat.fit	warn
1	0.00484031351276355	-
4	0.00719318166390739	-
12	0.0128761332804733	-
15	0.0169434999673837	-
17	0.0101323034928343	-
19	0.00836723208524477	-
28	0.00449135127620294	-
29	0.00385747148374016	-
38	0.00674353373446463	-
40	0.0131461409382888	-
53	0.00592993100686102	-
55	0.00589603011534332	-
56	0.00491232436320586	-
57	0.00804143150461969	-
59	0.00226143390936504	-
63	0.00749613908022777	-
64	0.00285948860772903	-
65	0.00801605610502184	-
67	0.00318784709827445	-
72	0.00623542531971804	-
75	0.00680909114574522	-
78	0.00468549561619846	-
82	0.0524345692311366	x3
84	0.0367271197847997	x3
85	0.00989947298128716	-
89	0.0168925244488124	-
97	0.00500122583041129	-
100	0.00425512220691264	-
113	0.0110790684027002	-
115	0.00507120068464605	-
124	0.00473684172597531	-
125	0.00922964933451304	-
128	0.0207721319973747	x2
131	0.0162249973335309	-
133	0.0182233625452757	-
135	0.0139536296063428	-
142	0.00442145782501884	-
158	0.0127991152470647	-
162	0.0177128318349022	-
166	0.00983844393799536	-
174	0.00627442737531583	-
179	0.00521059377236555	-
185	0.00799977830282454	-
186	0.00821735041546021	-
187	0.0078789034365572	-
190	0.0157298345023808	-
192	0.00817867776531519	-
198	0.00909370383505622	-
199	0.0199323454562758	x2
203	0.00405434837210797	-
206	0.0083612821181731	-
210	0.00978503871302132	-
213	0.00970922084319984	-
216	0.0149182493570483	-
218	0.00611944935992062	-
219	0.00362904194391087	-
225	0.00708228760326843	-
227	0.0412396683229537	x3
230	0.00681312431113274	-
231	0.0157123607939273	-
232	0.0081089542687112	-
233	0.00461399687133383	-
235	0.0150086559955097	-
237	0.00596201805569926	-
238	0.00531028426822971	-
239	0.00596201805569926	-
240	0.0150086559955097	-
242	0.00562526446142841	-
249	0.00497646432030685	-
254	0.0126501212145723	-
260	0.00634045173991864	-
262	0.0101908098981173	-
265	0.0116194358017322	-
269	0.0140217657951849	-
277	0.0140217657951849	-
280	0.00951436628749004	-
281	0.0117545522720848	-
283	0.00385813405025358	-
287	0.00743945408224725	-
291	0.0071116969164126	-
293	0.00551494404998517	-
297	0.00898357278135234	-
301	0.00373543517937772	-
303	0.00609655454809787	-
311	0.00880323107196449	-
312	0.0102914138641587	-
318	0.00622351447535456	-
322	0.00608721323647927	-
328	0.00938801889210872	-
329	0.0124493703542853	-
345	0.00832902349910734	-
347	0.00921102253242228	-
350	0.00947161968900862	-
352	0.00911453268066885	-
353	0.00515298180124694	-
355	0.025454108948975	x2
358	0.00613732743327774	-
359	0.00655001660769468	-
361	0.00448284922779815	-
363	0.00941589812405996	-
368	0.0115261700567231	-
369	0.00863314776144043	-
370	0.0110247916738572	-
378	0.0110247916738572	-
380	0.00561410232187094	-
386	0.00475995524016179	-
391	0.0235150422727321	x2
394	0.0152115290385893	-
395	0.0109379225247204	-
396	0.0204675723803336	x2
405	0.0040574901915689	-
412	0.00437462966893853	-
419	0.00585767656868298	-
422	0.0124494450927237	-
423	0.00996202927728911	-
435	0.00653547328558367	-
439	0.00653547328558367	-
440	0.00450848060674853	-
441	0.0184902546844784	-
444	0.00498455402887449	-
447	0.0106476823356985	-
449	0.00303019531170952	-
451	0.00747996640696402	-
455	0.0088249928741216	-
457	0.00541536377363253	-
458	0.00464231841584853	-
459	0.0112899720148898	-
464	0.0244857534147533	x2
468	0.0134421294038554	-
471	0.01012615826996	-
473	0.00735588948071157	-
477	0.00516156288965669	-
478	0.00890174149466149	-
486	0.00606869643557417	-
490	0.00317847524210614	-
495	0.0220949039446423	x2
500	0.013905678377124	-
503	0.0185501296966621	-
511	0.0199723352377191	x2
512	0.00804980989547654	-
516	0.0216834417508792	x2
525	0.00781113448760662	-
530	0.00402023326732858	-
531	0.0138983652194605	-
535	0.00796342857065753	-
536	0.0138983652194605	-
538	0.00738250023235585	-
539	0.0165795580258906	-
540	0.0135980092220373	-
543	0.00459110364490192	-
547	0.0062373054257867	-
548	0.00528739300186928	-
551	0.00458151270898615	-
552	0.00317933631241661	-
564	0.00726523717809654	-
565	0.0226965186896431	x2
569	0.0120169441869928	-
571	0.00753358864700671	-
573	0.00481618474618187	-
579	0.008414922479066	-
580	0.00552411257938098	-
590	0.00720645624534996	-
593	0.00542408954078238	-
596	0.0164186710797941	-
599	0.0041646761012019	-
600	0.00917643801210637	-
606	0.00527768465453606	-
607	0.00619676777771116	-
609	0.0166959028422804	-
616	0.0083879442421974	-
619	0.00894470118008801	-
621	0.00820367973314948	-
623	0.00378034486488587	-
626	0.0142850325908728	-
632	0.00713613080161321	-
637	0.014791522720897	-
648	0.0106023470798373	-
651	0.00852578664091562	-
654	0.0162062928148393	-
656	0.0117160987062136	-
659	0.00788872093026909	-
667	0.0139693141503386	-
668	0.00656446689067281	-
674	0.00487895506052905	-
679	0.0106396145902211	-
694	0.00932151893562053	-
702	0.00559065044602049	-
707	0.00431367978258386	-
710	0.00455173125723108	-
715	0.00524880567536497	-
717	0.00480384949898164	-
718	0.00382572377889324	-
720	0.00473773918386072	-
725	0.0193512457194846	x2
730	0.00941009021268978	-
733	0.00492186919226463	-
734	0.00768814792380247	-
739	0.00741474373451905	-
740	0.00672043542976497	-
741	0.00736170192056841	-
756	0.00997688512529609	-
764	0.00455785935388774	-
766	0.00551231387756773	-
769	0.00820570865386269	-
773	0.0155015818434288	-
776	0.0102100074529052	-
783	0.00740531764626412	-
790	0.0106829841755981	-
791	0.00625302273275585	-
794	0.00482359817559313	-
798	0.00873428768396094	-
800	0.00531769117396411	-
807	0.00674585677437783	-
809	0.00696495730388922	-
814	0.0102906159569542	-
816	0.00660370743701363	-
825	0.00690623650384422	-
826	0.00386197169910094	-
829	0.0133182592193543	-
831	0.00767620461570267	-
836	0.00476245731975611	-
842	0.0047328485419167	-
843	0.00752418903984249	-
849	0.00625748455384548	-
854	0.0122971161457692	-
857	0.0122971161457692	-
858	0.0049722500860684	-
859	0.0107816041557159	-
860	0.00470255193861244	-
861	0.00684412883839953	-
868	0.00473048502355054	-
869	0.00470255193861244	-
872	0.0100102366110711	-
873	0.00886458875688413	-
882	0.00778034460611888	-
894	0.00675685738367594	-
904	0.0133966199491272	-
914	0.00784768949488528	-
915	0.00509100160892492	-
921	0.00392502585957489	-
928	0.00501677042765714	-
936	0.00639414572887608	-
939	0.00780365067268622	-
941	0.00673672317469841	-
944	0.00672244303974259	-
948	0.0074245625015844	-
952	0.0074245625015844	-
953	0.00520870145601539	-
957	0.00535903180153484	-
958	0.00472990159979933	-
962	0.00230761539720655	-
969	0.00800807130294332	-
974	0.0102907203654412	-
975	0.0105637904393965	-
977	0.00772159703493067	-
981	0.00278523599070071	-
985	0.0138417300688879	-
987	0.00812220908751541	-
995	0.00961305648817896	-
997	0.010610021624388	-
1004	0.00879331513821133	-
1008	0.00537687766862606	-
1018	0.0258132593596103	x2
1028	0.00824302596307404	-
1038	0.00701790233909378	-
1040	0.00345077306185526	-
1047	0.0105954637102132	-
1048	0.00506595383959817	-
1057	0.00987557965949729	-
1062	0.0107850416139603	-
1072	0.0182651904853109	-
1078	0.0188858191568223	x2
1079	0.0188858191568223	x2
1082	0.102546847941418	x3
1086	0.0112157523178458	-
1092	0.00391811152154031	-
1102	0.0035082234265003	-
1104	0.0035082234265003	-
1108	0.00520699967749625	-
1109	0.00585755557714476	-
1110	0.00722002145595743	-
1112	0.0104339008738542	-
1120	0.0107207354741422	-
1123	0.00998650607896601	-
1133	0.00984394644669161	-
1134	0.0112644621085547	-
1137	0.00430014418976665	-
1143	0.00378421545815102	-
1145	0.00698967597214817	-
1147	0.00878636266261018	-
1157	0.0131633113548339	-
1159	0.0153373109747728	-
1174	0.00582746447541679	-
1189	0.0131849816455216	-
1190	0.012239488644396	-
1193	0.00808457567182392	-
1200	0.00542633666809838	-
1201	0.00535069174893898	-
1203	0.00907057357102498	-
1204	0.0119354227477388	-
1205	0.00832989416587761	-
1207	0.00832989416587761	-
1210	0.011443471509583	-
1215	0.0050337610503431	-
1216	0.00568819449893604	-
1222	0.00662458454607879	-
1228	0.00276712410453359	-
1232	0.0140867590233992	-
1233	0.00334239933952891	-
1235	0.0116827169124778	-
1239	0.00699971837251943	-
1241	0.0106947839951293	-
1242	0.00448251945326131	-
1245	0.0736573779496199	x3
1250	0.00429597231933415	-
1258	0.00671348590255765	-
1264	0.0070632272870633	-
1269	0.00610182944633724	-
1270	0.0210500401087414	x2
1273	0.00652964255359197	-
1276	0.00684551670687515	-
1279	0.00684551670687515	-
1284	0.00241272155750792	-
1287	0.00844249235258657	-
1291	0.00557273621360307	-
1292	0.00443956746084608	-
1295	0.00443956746084608	-
1299	0.0068014807361699	-
1324	0.00676688878079156	-
1325	0.00274030976753175	-
1329	0.00200285191868784	-
1330	0.00579538550300428	-
1332	0.0124647458033167	-
1336	0.00773901423708876	-
1338	0.00289270210570299	-
1343	0.00469124738317396	-
1344	0.00445509028237676	-
1348	0.00392352584176111	-
1351	0.00649135932537206	-
1352	0.00818842557648645	-
1354	0.00552491172138964	-
1355	0.00277208063404003	-
1357	0.00508879184827086	-
1359	0.0187120578283663	-
1361	0.00361242599358445	-
1368	0.0233757325728359	x2
1369	0.00784412159942159	-
1372	0.0163660816413588	-
1375	0.0281046570314544	x2
1376	0.00688926304904494	-
1379	0.00348063377557585	-
1381	0.0038064094127375	-
1388	0.00240234042638091	-
1390	0.0101026396108396	-
1399	0.00614804092845075	-
1401	0.0103447876956263	-
1416	0.00937933483226441	-
1417	0.00911093955900379	-
1418	0.00645061385980396	-
1425	0.00541490194212958	-
1426	0.00541490194212958	-
1428	0.00389810040139987	-
1429	0.00765436533352401	-
1433	0.00945051274476061	-
1434	0.00806922908643948	-
1443	0.00548837991205183	-
1446	0.0126547494834175	-
1448	0.00556723233228146	-
1449	0.0111082028535907	-
1451	0.00627969024638982	-
1454	0.00596123644305523	-
1461	0.0122755483062988	-
1465	0.0067665877195177	-
1466	0.0067665877195177	-
1470	0.0151454990101552	-
1479	0.0192688109222382	x2
1487	0.00391146284569803	-
1493	0.0072613487494304	-
1504	0.00841620828686864	-
1507	0.00563584125301709	-
1513	0.0059743543310235	-
1518	0.00675093502452954	-
1524	0.00370929860452018	-
1526	0.00205964211329188	-
1533	0.00485004661130033	-
1538	0.00543829399647129	-
1539	0.00741676678878138	-
1541	0.00751261117884468	-
1543	0.0114741191639367	-
1553	0.00656581759394597	-
1557	0.00676590400717074	-
1558	0.00605951896840456	-
1564	0.00290479389450605	-
1569	0.0039310400510855	-
1571	0.017713933276057	-
1575	0.0943740572789883	x3
1576	0.00664976896190858	-
1578	0.0087555879868427	-
1598	0.00864232842759682	-
Leverage Threshold: 0.0275
Points with leverage > threshold:
hat.fit.hat.fit...thresh.lever.
82	0.0524345692311366
84	0.0367271197847997
227	0.0412396683229537
1082	0.102546847941418
1245	0.0736573779496199
1375	0.0281046570314544
1575	0.0943740572789883
