# Supplementary material for: A methodology for the design of experiments in computational intelligence with multiple regression models
Source: PeerJ. 2016 Dec 1;4:e2721. doi: 10.7717/peerj.2721 (PMC5136129; doi:10.7717/peerj.2721)
Supplement: Data S1 — Datailed results from UC Irvine Machine Learning Repository (Housing, Machine CPU, Wine Quality, Automobile and Parkinson) and the 3 Use Cases (Protein Corona, Gajewicz Metal Oxides and Aquatic Toxicity) [file peerj-04-2721-s001.zip › 3_winequality/RRegsResAvgs.csv]

	RegrMeth	CVtype	adjR2.tr.Avg	RMSE.tr.Avg	R2.tr.Avg	RMSEsd.tr.Avg	R2sd.tr.Avg	adjR2.ts.Avg	RMSE.ts.Avg	R2.ts.Avg	corP.ts.Avg	adjR2.both.Avg	RMSE.both.Avg	R2.both.Avg	NoModelFeats.Avg
1	rf	repeatedcv	0.932272304228614	0.117390671804299	0.475162933313692	0.00966391797560211	0.065993522341914	0.486803629564326	0.115470765004847	0.500987448847724	0.707104841746046	0.821275867694845	0.0727655911508066	0.822506133937246	11
2	rfRFE	repeatedcv	0.929476697459342	0.117542717953058	0.475755788548486	0.00900724656008159	0.0614807868401135	0.487041594165975	0.11567659618422	0.500823996276368	0.70690217034253	0.819398226357027	0.0735726946416943	0.820603367775787	10.7
3	svmRadial	repeatedcv	0.522443845900964	0.125528237570509	0.400110842429251	0.0091841658487113	0.0632550401504407	0.379209925398985	0.126875559409188	0.396367440023636	0.628322482573477	0.488791195171368	0.115259460265005	0.492310154403605	11
4	svmRFE	repeatedcv	0.467349546345753	0.128012724242052	0.375993435642375	0.00824937190321159	0.0583560801037435	0.361997949097364	0.128349284553229	0.379631171609749	0.614375726889796	0.444275204599829	0.120480048941041	0.448100594305337	11
5	nnet	repeatedcv	0.414792690897228	0.129526723000412	0.361212873118606	0.00928194269176649	0.0664856867402743	0.351408606604691	0.129236766630209	0.369334499386973	0.606483309899607	0.402702297283618	0.124348547640235	0.40681385844124	11
6	lm	repeatedcv	0.354352483917182	0.130135486265698	0.351487840204771	0.00876226241507679	0.0633575780022081	0.336307202685778	0.13091081250334	0.354650470953256	0.594442519088513	0.354094333994977	0.129365484743829	0.358540493147703	11
7	glmnet	repeatedcv	0.35409166487129	0.130062510591503	0.352214557593636	0.00866999558031007	0.0631848104798346	0.337763639111318	0.131024221258736	0.354606854176655	0.594415308775108	0.353874946340413	0.129487558363765	0.357958989431221	10.1
8	lasso.RMSE	repeatedcv	0.35379548127165	0.130013007170358	0.352478879224377	0.00865108061379838	0.0631744843455298	0.338407343063493	0.131115364560582	0.353761576033124	0.593730834405201	0.353413300962631	0.129557223905905	0.35713593374578	9.2
9	glmStepAIC	repeatedcv	0.353241091034444	0.130152542714636	0.351155358322388	0.00871484120237095	0.0629110269346593	0.334390934717077	0.131079714196702	0.352787165164595	0.592856153855165	0.352828715132547	0.12949097367565	0.357283586304976	11
10	pls	repeatedcv	0.322337799966016	0.132446332090779	0.328008515992481	0.00891463370224549	0.0632328329301444	0.31230130091415	0.133358934727149	0.331308048878835	0.574581029235626	0.324061794601369	0.132342056817034	0.32871468587758	11
