# Supplementary material for: A methodology for the design of experiments in computational intelligence with multiple regression models
Source: PeerJ. 2016 Dec 1;4:e2721. doi: 10.7717/peerj.2721 (PMC5136129; doi:10.7717/peerj.2721)
Supplement: Data S1 — Datailed results from UC Irvine Machine Learning Repository (Housing, Machine CPU, Wine Quality, Automobile and Parkinson) and the 3 Use Cases (Protein Corona, Gajewicz Metal Oxides and Aquatic Toxicity) [file peerj-04-2721-s001.zip › 4_automobile/RRegrsResAllSplits.csv]

	RegrMeth	Split.No	CVtype	NoModelFeats	ModelFeats	adjR2.tr	RMSE.tr	R2.tr	RMSEsd.tr	R2sd.tr	adjR2.ts	RMSE.ts	R2.ts	corP.ts	adjR2.both	RMSE.both	R2.both
1	svmRFE	10	repeatedcv	4	V3+V5+V13+V2	0.791239761524584	0.151874138687566	0.799010641846587	0.0180692828944083	0.107567144572185	0.343789469303337	0.15847733435049	0.399637174043478	0.632168627854529	0.718125710865559	0.141902859158947	0.723937551878641
2	rfRFE	10	repeatedcv	13	V8+V7+V14+V12+V5+V3+V4+V13+V10+V9+V11+V6+V2	0.985905009301875	0.0474113087966725	0.94745607093575	0.0145128864170649	0.0283413595660741	0.814328658860308	0.063141920836469	0.865684561728734	0.930421711767698	0.962625699363277	0.0378907537784377	0.965130162808006
3	rf	10	repeatedcv	13	V2+V3+V4+V5+V6+V7+V8+V9+V10+V11+V12+V13+V14	0.986570373973111	0.048392678606995	0.937174546518338	0.0149382839053165	0.0508209008128592	0.807851324633873	0.0642569673226646	0.860998830586206	0.927900226633341	0.962216598947986	0.0379738800720254	0.964748476338069
4	nnet	10	LOOCV	13	V2+V3+V4+V5+V6+V7+V8+V9+V10+V11+V12+V13+V14	0.97811103089456	0.0624715703465086	0.91161718880906	NA	NA	0.47524687644285	0.112934574901506	0.620391357426742	0.787649260411474	0.899714564614598	0.0614866801630644	0.906434722655887
5	nnet	10	repeatedcv	13	V2+V3+V4+V5+V6+V7+V8+V9+V10+V11+V12+V13+V14	0.980210446514048	0.0666892639672994	0.894729014674103	0.0242995044854034	0.0806084506029465	0.565500185380768	0.0966535199323607	0.685680985169066	0.828058563852259	0.922483175919159	0.0536595429070023	0.927677602275091
6	svmRadial	10	LOOCV	13	V2+V3+V4+V5+V6+V7+V8+V9+V10+V11+V12+V13+V14	0.986615224752233	0.0585189930886891	0.920656190034873	NA	NA	0.646180289931935	0.0883727653314246	0.744045316120974	0.862580614273805	0.938306316225193	0.0482285380912373	0.942440429055464
7	svmRadial	10	repeatedcv	13	V2+V3+V4+V5+V6+V7+V8+V9+V10+V11+V12+V13+V14	0.986615224752233	0.0589978856168268	0.918295430950895	0.0141561187823826	0.0493248928004814	0.646180289931935	0.0883727653314246	0.744045316120974	0.862580614273805	0.938306316225193	0.0482285380912373	0.942440429055464
8	glmnet	10	LOOCV	10	V2+V5+V6+V7+V8+V10+V11+V12+V13+V14	0.853667701817083	0.0853929920624433	0.828701684874687	NA	NA	0.714242986292773	0.0819144748678796	0.775042350911332	0.88036489645563	0.840818644069609	0.0778183344281993	0.849023868602103
9	glmnet	10	repeatedcv	10	V2+V5+V6+V7+V8+V10+V11+V12+V13+V14	0.852439570038654	0.0843757927207954	0.835544590955712	0.0221649826380695	0.0864862881110257	0.71784074343312	0.0817026378917189	0.777874627809052	0.881972010785519	0.840230949640599	0.0779854403300563	0.848466467700362
10	lasso.RMSE	10	repeatedcv	11	V2+V5+V6+V7+V8+V9+V10+V11+V12+V13+V14	0.856243462816315	0.0833021605022254	0.838649898025232	0.0208212528676418	0.085640647681971	0.705452676981932	0.0818566968263485	0.774389284496799	0.879993911624847	0.842679204555844	0.0769528179751753	0.851599455843915
11	pls	10	LOOCV	13	V2+V3+V4+V5+V6+V7+V8+V9+V10+V11+V12+V13+V14	0.772852093555359	0.0992163456988513	0.768726643753156	NA	NA	0.570861442862234	0.0971134499990398	0.68955934164502	0.830397098769631	0.759023534819686	0.0946575442741034	0.775171442280222
12	pls	10	repeatedcv	13	V2+V3+V4+V5+V6+V7+V8+V9+V10+V11+V12+V13+V14	0.772852093555359	0.0967560176252239	0.786336899596844	0.0233202074842384	0.0925413155447941	0.570861442862234	0.0971134499990398	0.68955934164502	0.830397098769631	0.759023534819686	0.0946575442741034	0.775171442280222
13	glmStepAIC	10	LOOCV	13	V2+V3+V4+V5+V6+V7+V8+V9+V10+V11+V12+V13+V14	0.857425673930172	0.0862941259781187	0.825977088480348	0	0	0.665733405253695	0.0843988103133643	0.758190122949482	0.870741134292783	0.840545292684339	0.0769430625762351	0.85123040193745
14	glmStepAIC	10	repeatedcv	13	V2+V3+V4+V5+V6+V7+V8+V9+V10+V11+V12+V13+V14	0.857425673930172	0.0848337278651915	0.833641701166992	0.0209838768812893	0.0885058492022696	0.665733405253695	0.0843988103133643	0.758190122949482	0.870741134292783	0.840545292684339	0.0769430625762351	0.85123040193745
15	lm	10	LOOCV	13	V2+V3+V4+V5+V6+V7+V8+V9+V10+V11+V12+V13+V14	0.859123364048291	0.0862045076272075	0.826573130857124	0	0	0.665202027333223	0.0844876447690071	0.757805721900629	0.870520374201908	0.841785930133843	0.0766440580819521	0.85238790388776
16	lm	10	repeatedcv	13	V2+V3+V4+V5+V6+V7+V8+V9+V10+V11+V12+V13+V14	0.859123364048291	0.0842282912966423	0.836170272260337	0.0209161256624671	0.0859485780923164	0.665202027333223	0.0844876447690071	0.757805721900629	0.870520374201908	0.841785930133843	0.0766440580819521	0.85238790388776
17	svmRFE	9	repeatedcv	8	V2+V5+V3+V6+V13+V4+V7+V8	0.862452857056274	0.14057406455359	0.83865592074743	0.0186017848919032	0.0587624647883953	0.805143784628929	0.151127734907615	0.838310800011239	0.915593141090102	0.850462511829338	0.142763537970667	0.856629006186891
18	rfRFE	9	repeatedcv	13	V8+V7+V14+V12+V5+V3+V4+V13+V6+V9+V10+V11+V2	0.982522691254151	0.0561766421245768	0.917461162613271	0.0162728395371554	0.0712471076501372	0.929537754136517	0.0494862515008236	0.949027311503012	0.974180328020953	0.97258950057761	0.0335897526263344	0.974426286621378
19	rf	9	repeatedcv	13	V2+V3+V4+V5+V6+V7+V8+V9+V10+V11+V12+V13+V14	0.981958417453152	0.0554606033689099	0.917418983518138	0.0164566078583926	0.0651978291192044	0.931812806153883	0.0489510158340615	0.950673093813447	0.975024663182141	0.97261990562322	0.0335596214638528	0.974454654215479
20	nnet	9	LOOCV	13	V2+V3+V4+V5+V6+V7+V8+V9+V10+V11+V12+V13+V14	0.95831480767321	0.0687201486609952	0.879049409875414	NA	NA	0.697432802742127	0.125629898139544	0.781121601983666	0.883810840612213	0.880781455570723	0.0706181910950021	0.888770327104644
21	nnet	9	repeatedcv	13	V2+V3+V4+V5+V6+V7+V8+V9+V10+V11+V12+V13+V14	0.903083353865866	0.0684270768172708	0.86656656823597	0.0173437452759289	0.10553860883968	0.648987267025221	0.139488517804369	0.746075895294841	0.863756849637003	0.824590385621802	0.0857336754467649	0.836344638131682
22	svmRadial	9	LOOCV	13	V2+V3+V4+V5+V6+V7+V8+V9+V10+V11+V12+V13+V14	0.958068148498063	0.0724504699463893	0.865275833600433	NA	NA	0.847841737314218	0.0722671207394013	0.889928065291136	0.943359987115807	0.936811482004874	0.0490314265699492	0.941045764138568
23	svmRadial	9	repeatedcv	13	V2+V3+V4+V5+V6+V7+V8+V9+V10+V11+V12+V13+V14	0.958068148498063	0.0695348442260059	0.866018648623106	0.020608542926593	0.0968938386902172	0.847841737314218	0.0722671207394013	0.889928065291136	0.943359987115807	0.936811482004874	0.0490314265699492	0.941045764138568
24	glmnet	9	LOOCV	11	V2+V4+V5+V6+V7+V8+V9+V10+V11+V12+V13	0.84805004789158	0.0808887587764914	0.83002328507551	NA	NA	0.799614038335072	0.0853993237925879	0.846512880426864	0.920061346012788	0.844443463854173	0.0766473252481784	0.853263679821205
25	glmnet	9	repeatedcv	9	V2+V5+V6+V8+V9+V10+V11+V12+V13	0.845840087057343	0.0794104862245559	0.830869922448651	0.0175401874537092	0.0861519110014939	0.816658559864774	0.0833720476542214	0.851766495209818	0.922911965037737	0.844450666926067	0.0769391418119465	0.8516668730996
26	lasso.RMSE	9	repeatedcv	10	V2+V4+V5+V6+V8+V9+V10+V11+V12+V13	0.848217207169231	0.0789858860376627	0.831566696848554	0.0170599638101161	0.0861946149323833	0.80639278696275	0.0854391181883573	0.847585811013228	0.9206442369413	0.844631483211735	0.0768270766907816	0.85264016964412
27	pls	9	LOOCV	13	V2+V3+V4+V5+V6+V7+V8+V9+V10+V11+V12+V13+V14	0.739082819305914	0.101547172857602	0.732071420818649	NA	NA	0.738625187293131	0.0917115706123417	0.810920348254605	0.900511159428136	0.758985586264312	0.094680408946994	0.775136036669281
28	pls	9	repeatedcv	13	V2+V3+V4+V5+V6+V7+V8+V9+V10+V11+V12+V13+V14	0.739082819305914	0.0981853785149392	0.75837986932831	0.0235421201167423	0.0797539077990194	0.738625187293131	0.0917115706123417	0.810920348254605	0.900511159428136	0.758985586264312	0.094680408946994	0.775136036669281
29	glmStepAIC	9	LOOCV	13	V2+V3+V4+V5+V6+V7+V8+V9+V10+V11+V12+V13+V14	0.845674403845293	0.0791456856339922	0.837221874430225	0	0	0.778022546185729	0.0885318979320647	0.839420565325846	0.916198976929054	0.840335034959287	0.0775044065818541	0.851034233647582
30	glmStepAIC	9	repeatedcv	13	V2+V3+V4+V5+V6+V7+V8+V9+V10+V11+V12+V13+V14	0.845674403845293	0.0787359088597708	0.832370705182359	0.0165457832347293	0.0865747431111304	0.778022546185729	0.0885318979320647	0.839420565325846	0.916198976929054	0.840335034959287	0.0775044065818541	0.851034233647582
31	lm	9	LOOCV	13	V2+V3+V4+V5+V6+V7+V8+V9+V10+V11+V12+V13+V14	0.847276341506941	0.0816576658195064	0.82684360472296	0	0	0.780004557667959	0.0883762869516532	0.840854360866183	0.916981112600572	0.841716185639344	0.0771869818501289	0.852322832993409
32	lm	9	repeatedcv	13	V2+V3+V4+V5+V6+V7+V8+V9+V10+V11+V12+V13+V14	0.847276341506941	0.0800631305278264	0.827591944708537	0.0160597276205661	0.0867109656318904	0.780004557667959	0.0883762869516532	0.840854360866183	0.916981112600572	0.841716185639344	0.0771869818501289	0.852322832993409
33	svmRFE	8	repeatedcv	8	V2+V8+V5+V3+V7+V9+V6+V4	0.826691406396222	0.153742953295536	0.79961415044358	0.0203138838843104	0.0930123352620512	0.606351064528509	0.144849649776133	0.673355138651316	0.820582194939249	0.800919722371669	0.14642901664992	0.809129218356342
34	rfRFE	8	repeatedcv	8	V8+V7+V14+V12+V4+V5+V3+V13	0.984813789433364	0.0497177867477268	0.960933639014928	0.0178717474650468	0.0123924982448524	0.779608865141733	0.0588045960566848	0.81712224979846	0.903948145525206	0.964610774160224	0.0374712946450211	0.96607012367939
35	rf	8	repeatedcv	13	V2+V3+V4+V5+V6+V7+V8+V9+V10+V11+V12+V13+V14	0.986670552394267	0.0497576319690242	0.95159382881504	0.015346854339548	0.0340605121197832	0.756743998350938	0.0580800852741011	0.824027573275147	0.90775964510169	0.966473852222592	0.0360094805166423	0.968720449754068
36	nnet	8	LOOCV	13	V2+V3+V4+V5+V6+V7+V8+V9+V10+V11+V12+V13+V14	0.844222736904594	0.0911502868526883	0.824043040981016	NA	NA	0.735572612419985	0.0688189259154467	0.808712102601691	0.899284216808953	0.83110673569439	0.079195558398058	0.842424325570539
37	nnet	8	repeatedcv	13	V2+V3+V4+V5+V6+V7+V8+V9+V10+V11+V12+V13+V14	0.840308228129266	0.0882020783447699	0.852839505911095	0.0225313208637727	0.0669189632714167	0.734655641189776	0.0692649299208102	0.808048761711753	0.898915325106738	0.826408906366969	0.0803275329886894	0.838041299239286
38	svmRadial	8	LOOCV	13	V2+V3+V4+V5+V6+V7+V8+V9+V10+V11+V12+V13+V14	0.989841323534486	0.0597478165087814	0.924377477483127	NA	NA	0.611964859588465	0.0725008865159459	0.719293728212932	0.848111860672242	0.95647229420634	0.0405691777831683	0.95938909923375
39	svmRadial	8	repeatedcv	13	V2+V3+V4+V5+V6+V7+V8+V9+V10+V11+V12+V13+V14	0.989841323534486	0.0602663560159191	0.912687036262826	0.0156496575090867	0.0726333192200254	0.611964859588465	0.0725008865159459	0.719293728212932	0.848111860672242	0.95647229420634	0.0405691777831683	0.95938909923375
40	glmnet	8	LOOCV	11	V2+V5+V6+V7+V8+V9+V10+V11+V12+V13+V14	0.849846882539614	0.0909280719631184	0.82354756333833	NA	NA	0.749039924186453	0.0647838567991513	0.807775261078985	0.898763184091886	0.841914131478644	0.0770935492657091	0.850877763198927
41	glmnet	8	repeatedcv	8	V5+V6+V7+V8+V10+V11+V12+V13	0.84142378611726	0.0890109292126078	0.856351530991366	0.0248421169390198	0.073156891613603	0.726179348468992	0.0683319678947591	0.772787118942355	0.879083112647692	0.829426635287665	0.0807343014815212	0.836460588471679
42	lasso.RMSE	8	repeatedcv	8	V5+V6+V7+V8+V10+V11+V12+V13	0.848494023072376	0.08822181187585	0.85861861596907	0.0244560001739956	0.0704805760664414	0.746571815934035	0.0658424727868886	0.789708528115476	0.888655460859537	0.838715891381128	0.0784493922137341	0.845366782458195
43	pls	8	LOOCV	13	V2+V3+V4+V5+V6+V7+V8+V9+V10+V11+V12+V13+V14	0.777387069122724	0.102600278076182	0.775269693353776	NA	NA	0.64317078434139	0.0937392617054312	0.741868226970367	0.861317727073098	0.754967825098923	0.096557138629439	0.771387506922191
44	pls	8	repeatedcv	13	V2+V3+V4+V5+V6+V7+V8+V9+V10+V11+V12+V13+V14	0.777387069122724	0.0998385612198831	0.792565962764584	0.0201114409127568	0.0818875593875986	0.64317078434139	0.0937392617054312	0.741868226970367	0.861317727073098	0.754967825098923	0.096557138629439	0.771387506922191
45	glmStepAIC	8	LOOCV	13	V2+V3+V4+V5+V6+V7+V8+V9+V10+V11+V12+V13+V14	0.847034726113997	0.0907191104530375	0.82547322012477	0	0	0.739788047709003	0.0638565889098207	0.81176156642779	0.900978116508825	0.841189647718009	0.0769664874104362	0.851831578541029
46	glmStepAIC	8	repeatedcv	13	V2+V3+V4+V5+V6+V7+V8+V9+V10+V11+V12+V13+V14	0.847034726113997	0.0885662650954148	0.859882844292171	0.0276249625921678	0.0701736825797235	0.739788047709003	0.0638565889098207	0.81176156642779	0.900978116508825	0.841189647718009	0.0769664874104362	0.851831578541029
47	lm	8	LOOCV	13	V2+V3+V4+V5+V6+V7+V8+V9+V10+V11+V12+V13+V14	0.84946676148867	0.0929092815061903	0.817113905373957	0	0	0.733390480685294	0.0660813840912582	0.807133539219149	0.898406110408399	0.841673223028147	0.076920566624653	0.852282749320075
48	lm	8	repeatedcv	13	V2+V3+V4+V5+V6+V7+V8+V9+V10+V11+V12+V13+V14	0.84946676148867	0.090011622740486	0.85611182102472	0.0280227093588956	0.0719855107982469	0.733390480685294	0.0660813840912582	0.807133539219149	0.898406110408399	0.841673223028147	0.076920566624653	0.852282749320075
49	svmRFE	7	repeatedcv	4	V13+V2+V9+V6	0.53472744714479	0.147753294123153	0.752443183568903	0.0233177770370688	0.125970046243149	0.0832959268892086	0.181797543967638	0.161313294813531	0.401638263632253	0.452179821617434	0.17843367837448	0.463475083027384
50	rfRFE	7	repeatedcv	13	V8+V7+V12+V14+V3+V4+V5+V13+V10+V11+V9+V6+V2	0.984221763699911	0.0519488863807291	0.931828969952426	0.0149875870488425	0.0519365360875256	0.907812379262975	0.03999385812812	0.933311082871088	0.966080267302406	0.975329391194418	0.0305915792061523	0.976982576320565
51	rf	7	repeatedcv	13	V2+V3+V4+V5+V6+V7+V8+V9+V10+V11+V12+V13+V14	0.984689384206457	0.0535257445524068	0.931351575248436	0.0143707811059932	0.0494274235055051	0.903511875734809	0.0416159903092573	0.930200080318798	0.964468807333238	0.974906484289296	0.030668478487277	0.976588008537951
52	nnet	7	LOOCV	13	V2+V3+V4+V5+V6+V7+V8+V9+V10+V11+V12+V13+V14	0.966928285513711	0.0890294733685336	0.837434952764206	NA	NA	0.799236619470181	0.0581826373496387	0.854766916212471	0.924536054576819	0.950182941571777	0.0431724035569804	0.95352119806439
53	nnet	7	repeatedcv	13	V2+V3+V4+V5+V6+V7+V8+V9+V10+V11+V12+V13+V14	0.83910520239019	0.0880788377843303	0.836528875447573	0.0236763686518407	0.0740864199571152	0.751224954619407	0.0658307551932347	0.820035073554464	0.905557879737383	0.835123534651227	0.0785745438617408	0.84617195758697
54	svmRadial	7	LOOCV	13	V2+V3+V4+V5+V6+V7+V8+V9+V10+V11+V12+V13+V14	0.989089889164272	0.0643619103731948	0.908855131483959	NA	NA	0.84538931527441	0.0712182286303759	0.888153972751701	0.942419212851532	0.958686381344988	0.0400853432928253	0.961454819708468
55	svmRadial	7	repeatedcv	13	V2+V3+V4+V5+V6+V7+V8+V9+V10+V11+V12+V13+V14	0.980278067475577	0.0655741790793827	0.903119919963174	0.0203756130587649	0.0604803836116419	0.852371365479924	0.057834930967379	0.893204817581222	0.945095136788473	0.960488801926764	0.0383383829197513	0.96313645952961
56	glmnet	7	LOOCV	9	V2+V5+V6+V7+V8+V10+V11+V12+V13	0.843452731725146	0.0907661097582364	0.818291274161464	NA	NA	0.801482854153567	0.0621058565128943	0.839496775698629	0.91624056649912	0.842191652415461	0.0774499900172974	0.849512658231238
57	glmnet	7	repeatedcv	8	V5+V6+V7+V8+V10+V11+V12+V13	0.8385737247341	0.0877622495148175	0.836174271323233	0.0260047586495245	0.0838995207428252	0.812105842253102	0.0615589133109076	0.844087826550446	0.918742524622893	0.837905603081795	0.0788507094042604	0.84458990810935
58	lasso.RMSE	7	repeatedcv	10	V2+V5+V6+V7+V8+V9+V10+V11+V12+V13	0.845080909894104	0.0863110750525692	0.839047779454053	0.0249542970394013	0.0834587530948143	0.789844014277683	0.0628323134488833	0.834558053793069	0.913541489913331	0.843378950585883	0.0769045369645416	0.851452200555683
59	pls	7	LOOCV	13	V2+V3+V4+V5+V6+V7+V8+V9+V10+V11+V12+V13+V14	0.761318074630195	0.104554577123357	0.758825061273617	NA	NA	0.746949782562289	0.0744353367918187	0.816942395896124	0.903848657628103	0.765296366315825	0.093766817342544	0.781023929397754
60	pls	7	repeatedcv	13	V2+V3+V4+V5+V6+V7+V8+V9+V10+V11+V12+V13+V14	0.761318074630195	0.101603291973349	0.77686882796093	0.0222634857352964	0.0927023997000073	0.746949782562289	0.0744353367918187	0.816942395896124	0.903848657628103	0.765296366315825	0.093766817342544	0.781023929397754
61	glmStepAIC	7	LOOCV	13	V2+V3+V4+V5+V6+V7+V8+V9+V10+V11+V12+V13+V14	0.844588347835544	0.0895521707349121	0.823965289111268	0	0	0.735274076227877	0.0673809302975195	0.808496140249953	0.899164134210186	0.839920122934332	0.0771646278426138	0.850647125005743
62	glmStepAIC	7	repeatedcv	13	V2+V3+V4+V5+V6+V7+V8+V9+V10+V11+V12+V13+V14	0.844588347835544	0.086506843708001	0.837721779243686	0.02633651753004	0.0867249637440094	0.735274076227877	0.0673809302975195	0.808496140249953	0.899164134210186	0.839920122934332	0.0771646278426138	0.850647125005743
63	lm	7	LOOCV	13	V2+V3+V4+V5+V6+V7+V8+V9+V10+V11+V12+V13+V14	0.846620974093479	0.0920534539341233	0.814598552973663	0	0	0.744221347006469	0.0668843656683204	0.81496863400468	0.902756132078138	0.842156673636041	0.0766466438783943	0.852733803753213
64	lm	7	repeatedcv	13	V2+V3+V4+V5+V6+V7+V8+V9+V10+V11+V12+V13+V14	0.846620974093479	0.0877828029954609	0.833796883828386	0.0267650114620611	0.0869497383732912	0.744221347006469	0.0668843656683204	0.81496863400468	0.902756132078138	0.842156673636041	0.0766466438783943	0.852733803753213
65	svmRFE	6	repeatedcv	4	V7+V2+V5+V4	0.799136665832557	0.146485476338091	0.765474314363183	0.0163338174480687	0.166976298341908	0.564461339064944	0.1644603497196	0.601528459144523	0.775582657841524	0.760172711952708	0.144009649396386	0.765117604489766
66	rfRFE	6	repeatedcv	13	V8+V7+V14+V3+V12+V5+V4+V13+V11+V9+V10+V2+V6	0.983995948593364	0.0530085867105145	0.924971136972551	0.0101407981566647	0.0473190315907967	0.830000907300624	0.0645735946004177	0.877021932940877	0.936494491676741	0.960967403859229	0.0390298495324031	0.963582990198559
67	rf	6	repeatedcv	13	V2+V3+V4+V5+V6+V7+V8+V9+V10+V11+V12+V13+V14	0.984458590435478	0.0515141801214609	0.929089434356331	0.0164592986298829	0.0588570963705554	0.830360603492987	0.0641955441962632	0.877282138697055	0.936633406780398	0.961471045328928	0.0386357108865431	0.964052882497608
68	nnet	6	LOOCV	13	V2+V3+V4+V5+V6+V7+V8+V9+V10+V11+V12+V13+V14	0.965665986611523	0.0596815790441401	0.915431478738627	NA	NA	0.585227235239648	0.10559286833121	0.699951616981873	0.836631111650692	0.900946953104505	0.0610637699467693	0.907584528411935
69	nnet	6	repeatedcv	13	V2+V3+V4+V5+V6+V7+V8+V9+V10+V11+V12+V13+V14	0.977892047723342	0.0689798694843763	0.898726120595788	0.0324523172499101	0.0869160458486712	0.675730652983257	0.0892514548684297	0.765422174498527	0.874884092036497	0.93031512426659	0.0509453172068081	0.93498472934151
70	svmRadial	6	LOOCV	13	V2+V3+V4+V5+V6+V7+V8+V9+V10+V11+V12+V13+V14	0.984511355483295	0.0583746722430164	0.919687047781652	NA	NA	0.742134044540549	0.0786554297310401	0.813458670518695	0.901919436822766	0.947636342639416	0.0444411970491485	0.951145247514094
71	svmRadial	6	repeatedcv	13	V2+V3+V4+V5+V6+V7+V8+V9+V10+V11+V12+V13+V14	0.982749631268498	0.0599340751000412	0.909772190962571	0.0174684409759265	0.0749853694676316	0.729084995985487	0.0805129226561883	0.804018933266098	0.896671028452519	0.944280796397181	0.0458037558614957	0.94801455746335
72	glmnet	6	LOOCV	12	V2+V4+V5+V6+V7+V8+V9+V10+V11+V12+V13+V14	0.872189814367258	0.0808637728193398	0.843110434772798	NA	NA	0.642217873289332	0.0943906779340107	0.733566501385673	0.856484968569603	0.843039502358835	0.0766853880945839	0.852748399120144
73	glmnet	6	repeatedcv	11	V2+V4+V5+V6+V7+V8+V10+V11+V12+V13+V14	0.872806930793693	0.0786760055677042	0.859406820088012	0.0235866629178578	0.0777929703997671	0.653429104534709	0.094185800868989	0.734541441771266	0.857053931658485	0.843886504962358	0.0766918380684854	0.85273830107274
74	lasso.RMSE	6	repeatedcv	11	V2+V4+V5+V6+V7+V8+V10+V11+V12+V13+V14	0.872291431050011	0.0773695056894122	0.860666294562323	0.0229078384693179	0.0801748995229172	0.656283372754468	0.0937618779418707	0.73672768976938	0.858328427683355	0.84403528431344	0.0766534081248669	0.852878644481235
75	pls	6	LOOCV	13	V2+V3+V4+V5+V6+V7+V8+V9+V10+V11+V12+V13+V14	0.776106662823987	0.0975817893128427	0.771343488134885	NA	NA	0.617312442787994	0.0963383594745248	0.723162192655144	0.850389435879318	0.766501582814774	0.0932016759629556	0.782148383966361
76	pls	6	repeatedcv	13	V2+V3+V4+V5+V6+V7+V8+V9+V10+V11+V12+V13+V14	0.776106662823987	0.0949211843827682	0.791279972490616	0.0228898349099613	0.0862893358565393	0.617312442787994	0.0963383594745248	0.723162192655144	0.850389435879318	0.766501582814774	0.0932016759629556	0.782148383966361
77	glmStepAIC	6	LOOCV	13	V2+V3+V4+V5+V6+V7+V8+V9+V10+V11+V12+V13+V14	0.871638736291799	0.0821915699509351	0.838771142403373	0	0	0.613502816970099	0.0966538520943196	0.720406293127306	0.848767514180006	0.839682776839416	0.0772651770028308	0.850425683546053
78	glmStepAIC	6	repeatedcv	13	V2+V3+V4+V5+V6+V7+V8+V9+V10+V11+V12+V13+V14	0.871638736291799	0.0777059320401068	0.858651016863542	0.0234868722138705	0.0828415775953062	0.613502816970099	0.0966538520943196	0.720406293127306	0.848767514180006	0.839682776839416	0.0772651770028308	0.850425683546053
79	lm	6	LOOCV	13	V2+V3+V4+V5+V6+V7+V8+V9+V10+V11+V12+V13+V14	0.87306700479612	0.0815350065930153	0.841741333026188	0	0	0.615125727768579	0.0968049592702613	0.721580313704929	0.849458835791899	0.840682974692935	0.0770471521830596	0.851358857832068
80	lm	6	repeatedcv	13	V2+V3+V4+V5+V6+V7+V8+V9+V10+V11+V12+V13+V14	0.87306700479612	0.0783107662950842	0.857107502904221	0.0238240383476071	0.0814600303011134	0.615125727768579	0.0968049592702613	0.721580313704929	0.849458835791899	0.840682974692935	0.0770471521830596	0.851358857832068
81	svmRFE	5	repeatedcv	8	V2+V3+V4+V13+V10+V11+V12+V6	0.753743616150789	0.12922143348367	0.735501122851692	0.0233311085937013	0.138746306418959	0.590161637061651	0.159163505535519	0.659921358412859	0.812355438470661	0.718471569462639	0.131818623803851	0.730080989278613
82	rfRFE	5	repeatedcv	13	V8+V7+V12+V14+V5+V3+V4+V13+V10+V9+V6+V11+V2	0.977157352229165	0.0588159406705387	0.901644534610852	0.0135661224610046	0.0655409708409358	0.934047812749463	0.0629300900534723	0.952289907095356	0.9758534250057	0.964281456399773	0.0396705309313513	0.966674967053396
83	rf	5	repeatedcv	13	V2+V3+V4+V5+V6+V7+V8+V9+V10+V11+V12+V13+V14	0.978689677341624	0.0560779631007388	0.904087296223684	0.0145482036269493	0.066367306289858	0.936264432758852	0.0634727952652976	0.953893419442573	0.976674674312063	0.96454466347237	0.0391487519525065	0.966920536538655
84	nnet	5	LOOCV	13	V2+V3+V4+V5+V6+V7+V8+V9+V10+V11+V12+V13+V14	0.958731408835329	0.0837402237201073	0.808537783925369	NA	NA	0.870424781149773	0.0753939287560758	0.906264735299836	0.951979377560163	0.936618976540894	0.048889941993102	0.940866158525267
85	nnet	5	repeatedcv	13	V2+V3+V4+V5+V6+V7+V8+V9+V10+V11+V12+V13+V14	0.81220812115138	0.0833823848890397	0.817249383604415	0.0235990303100536	0.0827586178978061	0.765118500962407	0.100327911835296	0.830085724100464	0.911090403911963	0.816387170846366	0.0841768122945925	0.828691123315424
86	svmRadial	5	LOOCV	13	V2+V3+V4+V5+V6+V7+V8+V9+V10+V11+V12+V13+V14	0.980831680659364	0.0669552910406289	0.871771538418624	NA	NA	0.877448935569643	0.0717974083807506	0.911346038497188	0.954644456589566	0.955019698059557	0.0418972043775874	0.95803384200402
87	svmRadial	5	repeatedcv	13	V2+V3+V4+V5+V6+V7+V8+V9+V10+V11+V12+V13+V14	0.985741074515451	0.0666121671865315	0.872992333086671	0.0226255821877481	0.0985736249331492	0.882497053626508	0.0695251245019548	0.914997868580878	0.956555209374178	0.959763341760127	0.0393738037354494	0.962459612673108
88	glmnet	5	LOOCV	9	V2+V5+V6+V7+V8+V10+V11+V12+V13	0.814495101481495	0.0879753643370596	0.778452573224371	NA	NA	0.850078761979956	0.0841888833553345	0.878787084154007	0.937436442727723	0.835172760469887	0.0796958592502898	0.84281938498417
89	glmnet	5	repeatedcv	10	V2+V5+V6+V7+V8+V10+V11+V12+V13+V14	0.808475112083004	0.0857404019768441	0.818286242647076	0.0246591086201471	0.0831546582255292	0.836751626284365	0.0883574957023318	0.871485322819607	0.933533782366555	0.828707519701293	0.0819272827880337	0.837537028995041
90	lasso.RMSE	5	repeatedcv	9	V2+V5+V6+V7+V8+V10+V11+V12+V13	0.814783733103348	0.0843921264560522	0.820056438699686	0.02318798173228	0.0860257729187136	0.851171822312663	0.0837317886590555	0.879670835061303	0.937907690053399	0.835685461044704	0.0795067401663153	0.843308300480774
91	pls	5	LOOCV	13	V2+V3+V4+V5+V6+V7+V8+V9+V10+V11+V12+V13+V14	0.733624428600488	0.0972980315998846	0.728880184216545	NA	NA	0.746109181728222	0.102267605368745	0.816334301675735	0.903512203390599	0.759537331428139	0.0946618839907418	0.775650809219037
92	pls	5	repeatedcv	13	V2+V3+V4+V5+V6+V7+V8+V9+V10+V11+V12+V13+V14	0.733624428600488	0.0944510996715376	0.757874256647068	0.0234507712048905	0.0914292408784591	0.746109181728222	0.102267605368745	0.816334301675735	0.903512203390599	0.759537331428139	0.0946618839907418	0.775650809219037
93	glmStepAIC	5	LOOCV	13	V2+V3+V4+V5+V6+V7+V8+V9+V10+V11+V12+V13+V14	0.811861843612335	0.0888429656316699	0.777387104710577	0	0	0.821727599895952	0.0852484266202877	0.871036987158774	0.933293623228389	0.830763382888613	0.0793696395485157	0.842103980942469
94	glmStepAIC	5	repeatedcv	13	V2+V3+V4+V5+V6+V7+V8+V9+V10+V11+V12+V13+V14	0.811861843612335	0.0870985422638575	0.812767871294814	0.0264359002483985	0.0885276497415582	0.821727599895952	0.0852484266202877	0.871036987158774	0.933293623228389	0.830763382888613	0.0793696395485157	0.842103980942469
95	lm	5	LOOCV	13	V2+V3+V4+V5+V6+V7+V8+V9+V10+V11+V12+V13+V14	0.816207735910571	0.0897169800416496	0.77262673028223	0	0	0.827852870998674	0.083618451234602	0.875468034339466	0.935664488125667	0.835330083472736	0.0782789376566324	0.846364665508068
96	lm	5	repeatedcv	13	V2+V3+V4+V5+V6+V7+V8+V9+V10+V11+V12+V13+V14	0.816207735910571	0.0870792619229377	0.811298667176837	0.0264752733557736	0.0913457370882241	0.827852870998674	0.083618451234602	0.875468034339466	0.935664488125667	0.835330083472736	0.0782789376566324	0.846364665508068
97	svmRFE	4	repeatedcv	8	V2+V3+V13+V5+V6+V4+V10+V8	0.818655941647484	0.138071283684751	0.759012804759397	0.0214145938547483	0.16520577787431	0.804890460281711	0.134614089268118	0.838100594701845	0.915478342016809	0.822114717257021	0.127948162759433	0.829450192834051
98	rfRFE	4	repeatedcv	13	V8+V7+V12+V14+V4+V5+V3+V13+V10+V11+V6+V9+V2	0.980373909034099	0.0611457314767113	0.908828443240158	0.0155248532293979	0.0881058727227734	0.968828972896839	0.032732673858929	0.977450746350904	0.988661087709486	0.977588745645432	0.0294595978476068	0.979090530731047
99	rf	4	repeatedcv	13	V2+V3+V4+V5+V6+V7+V8+V9+V10+V11+V12+V13+V14	0.983543366011307	0.0580938578969526	0.904134449883978	0.0158722256025174	0.0788552872950121	0.947409631711145	0.0459105280551516	0.961955903791041	0.980793507212931	0.973224032824961	0.0315642689043895	0.975018298666588
100	nnet	4	LOOCV	13	V2+V3+V4+V5+V6+V7+V8+V9+V10+V11+V12+V13+V14	0.810727482571569	0.0910266812864355	0.789851630450939	NA	NA	0.813524853862535	0.0776786057001249	0.865103085772897	0.930109179490718	0.82546490432902	0.0817295004002328	0.837160555069859
101	nnet	4	repeatedcv	13	V2+V3+V4+V5+V6+V7+V8+V9+V10+V11+V12+V13+V14	0.814624800157887	0.0886279397730422	0.811765375556737	0.0259937112214778	0.0925815694135661	0.822422392537862	0.0756064221515796	0.871539603112496	0.933562854398404	0.830142985497725	0.0803504171522776	0.84152515657262
102	svmRadial	4	LOOCV	13	V2+V3+V4+V5+V6+V7+V8+V9+V10+V11+V12+V13+V14	0.951803355833576	0.075239290977099	0.857139506904861	NA	NA	0.861550055343055	0.0656367803038145	0.899844720886465	0.948601455241592	0.936521925776123	0.0488245123868192	0.940775611162259
103	svmRadial	4	repeatedcv	13	V2+V3+V4+V5+V6+V7+V8+V9+V10+V11+V12+V13+V14	0.951803355833576	0.0745210991513045	0.849164434207217	0.027921348875923	0.0992066676400181	0.861550055343055	0.0656367803038145	0.899844720886465	0.948601455241592	0.936521925776123	0.0488245123868192	0.940775611162259
104	glmnet	4	LOOCV	8	V5+V6+V7+V8+V10+V11+V12+V13	0.818971937853974	0.0932717702601883	0.776101120161816	NA	NA	0.876146168805843	0.0684260464569105	0.897227671987828	0.94722102594264	0.839622211467412	0.0787955481237671	0.846235728520302
105	glmnet	4	repeatedcv	9	V5+V6+V7+V8+V9+V10+V11+V12+V13	0.819612333794036	0.0901677840264402	0.81284791350538	0.0259971748177694	0.0983880151973685	0.871092885293859	0.0689056884317633	0.895777226407801	0.946455084199879	0.839758782066107	0.0785553035418676	0.847192653001185
106	lasso.RMSE	4	repeatedcv	9	V5+V6+V7+V8+V9+V10+V11+V12+V13	0.820974802475105	0.0879597793620322	0.816260683668754	0.0246780822631445	0.100372173784182	0.876841300256825	0.0672783648885624	0.90042488105871	0.948907203607766	0.84188254461163	0.0778451942701749	0.849217890480163
107	pls	4	LOOCV	13	V2+V3+V4+V5+V6+V7+V8+V9+V10+V11+V12+V13+V14	0.731492600489117	0.103061802852229	0.72648727779877	NA	NA	0.779564259085513	0.0830691591503027	0.84053584699803	0.916807420889486	0.761561017957306	0.0941169590316914	0.777538887888002
108	pls	4	repeatedcv	13	V2+V3+V4+V5+V6+V7+V8+V9+V10+V11+V12+V13+V14	0.731492600489117	0.100289750466814	0.751412548754159	0.0241738072525645	0.0966136352579164	0.779564259085513	0.0830691591503027	0.84053584699803	0.916807420889486	0.761561017957306	0.0941169590316914	0.777538887888002
109	glmStepAIC	4	LOOCV	13	V2+V3+V4+V5+V6+V7+V8+V9+V10+V11+V12+V13+V14	0.819400112662499	0.0931328031402754	0.77807804713128	0	0	0.868759671044325	0.0664343859636434	0.90506018756398	0.951346512877395	0.841615335188372	0.0768237049600016	0.852228740562347
110	glmStepAIC	4	repeatedcv	13	V2+V3+V4+V5+V6+V7+V8+V9+V10+V11+V12+V13+V14	0.819400112662499	0.0894887613313188	0.815869821386263	0.0276860439054068	0.104647981573378	0.868759671044325	0.0664343859636434	0.90506018756398	0.951346512877395	0.841615335188372	0.0768237049600016	0.852228740562347
111	lm	4	LOOCV	13	V2+V3+V4+V5+V6+V7+V8+V9+V10+V11+V12+V13+V14	0.822770175219441	0.0941133831795685	0.774801933750441	0	0	0.862049091900018	0.067415021842099	0.900205726055332	0.948791719006512	0.843040662409607	0.0764482347656552	0.853558556165664
112	lm	4	repeatedcv	13	V2+V3+V4+V5+V6+V7+V8+V9+V10+V11+V12+V13+V14	0.822770175219441	0.0904328460552551	0.812211329622428	0.0273807247141549	0.104940057943694	0.862049091900018	0.067415021842099	0.900205726055332	0.948791719006512	0.843040662409607	0.0764482347656552	0.853558556165664
113	svmRFE	3	repeatedcv	4	V4+V2+V5+V13	0.761508158743756	0.134684520410674	0.691717638608754	0.0274248509418627	0.164083366962689	0.4837144433153	0.160114542208976	0.527653639628891	0.72639771449867	0.681229291694577	0.117083741874629	0.6878018836184
114	rfRFE	3	repeatedcv	13	V8+V7+V14+V12+V4+V5+V3+V13+V10+V9+V6+V11+V2	0.982215985350504	0.0489464720707168	0.909591190337384	0.0181128586542987	0.0906512260550733	0.871570394792906	0.0761049461080201	0.90709347708423	0.952414551067039	0.954160326044579	0.0435874703456376	0.95723205677355
115	rf	3	repeatedcv	13	V2+V3+V4+V5+V6+V7+V8+V9+V10+V11+V12+V13+V14	0.983737708633934	0.0497032928485772	0.917996032691395	0.01361524365923	0.0693428884999349	0.889020142113574	0.0705573861450245	0.919716698550245	0.959018612202206	0.959820167895923	0.0406292640374291	0.962512630871969
116	nnet	3	LOOCV	13	V2+V3+V4+V5+V6+V7+V8+V9+V10+V11+V12+V13+V14	0.92084666137719	0.0635033945132987	0.885364435670087	NA	NA	0.646401814189144	0.13454148761928	0.744205567711296	0.862673500063202	0.841903199719064	0.0795316453609972	0.852497315201807
117	nnet	3	repeatedcv	13	V2+V3+V4+V5+V6+V7+V8+V9+V10+V11+V12+V13+V14	0.921228805258468	0.0593795450684719	0.881432594268099	0.0170940060747628	0.110534509701872	0.617857597891821	0.144862679629164	0.723556560177063	0.850621278935028	0.828843260857274	0.0838216339540581	0.840312526882302
118	svmRadial	3	LOOCV	13	V2+V3+V4+V5+V6+V7+V8+V9+V10+V11+V12+V13+V14	0.967124267740605	0.0647379451312313	0.879117187069125	NA	NA	0.82805664343019	0.086519940175553	0.875615444183542	0.935743257621203	0.931932639721915	0.0512578151277641	0.93649385458591
119	svmRadial	3	repeatedcv	13	V2+V3+V4+V5+V6+V7+V8+V9+V10+V11+V12+V13+V14	0.967124267740605	0.0636939843286611	0.85849005503443	0.0189925900192419	0.134461450118224	0.82805664343019	0.086519940175553	0.875615444183542	0.935743257621203	0.931932639721915	0.0512578151277641	0.93649385458591
120	glmnet	3	LOOCV	9	V5+V6+V7+V8+V9+V10+V11+V12+V13	0.884279426651398	0.0671901192955239	0.86879185726089	NA	NA	0.715876738084876	0.117621764579025	0.770283320153729	0.877657860532069	0.838510493925483	0.0789345430938397	0.846002275135126
121	glmnet	3	repeatedcv	11	V4+V5+V6+V7+V8+V9+V10+V11+V12+V13+V14	0.8824049250174	0.0660716536689019	0.862598903564345	0.0147439036469159	0.100338286258993	0.699192569446067	0.116737484991624	0.769594308511881	0.877265244103447	0.83701039664892	0.0786735076218292	0.846252075189445
122	lasso.RMSE	3	repeatedcv	9	V5+V6+V7+V8+V9+V10+V11+V12+V13	0.884980968107826	0.0658954645701337	0.863013379845036	0.0147830148323933	0.100411386998058	0.713138291003195	0.119216029948922	0.768069256555775	0.876395605052749	0.837618735703486	0.0793859471325305	0.845151887139922
123	pls	3	LOOCV	13	V2+V3+V4+V5+V6+V7+V8+V9+V10+V11+V12+V13+V14	0.747852912321497	0.0947329233535588	0.739115938646055	NA	NA	0.66799919342755	0.118337357864893	0.7598292037561	0.871681824839832	0.748890700893629	0.0969660200204383	0.765717612689417
124	pls	3	repeatedcv	13	V2+V3+V4+V5+V6+V7+V8+V9+V10+V11+V12+V13+V14	0.747852912321497	0.0922126499846593	0.770170691665857	0.0195421450469027	0.0809554266822131	0.66799919342755	0.118337357864893	0.7598292037561	0.871681824839832	0.748890700893629	0.0969660200204383	0.765717612689417
125	glmStepAIC	3	LOOCV	13	V2+V3+V4+V5+V6+V7+V8+V9+V10+V11+V12+V13+V14	0.882265677024132	0.0664335325838968	0.871753298779718	0	0	0.668651530816196	0.124529112780229	0.760301107398951	0.871952468543412	0.829936637013554	0.0812277004352912	0.841332635564192
126	glmStepAIC	3	repeatedcv	13	V2+V3+V4+V5+V6+V7+V8+V9+V10+V11+V12+V13+V14	0.882265677024132	0.0656322950935242	0.860688240296485	0.0157642716712918	0.109384943224443	0.668651530816196	0.124529112780229	0.760301107398951	0.871952468543412	0.829936637013554	0.0812277004352912	0.841332635564192
127	lm	3	LOOCV	13	V2+V3+V4+V5+V6+V7+V8+V9+V10+V11+V12+V13+V14	0.884391537795324	0.0680374548534306	0.865602324513369	0	0	0.665424792711242	0.12406378151589	0.757966871323026	0.87061292852968	0.831305895354753	0.0807419040598166	0.842610139480465
128	lm	3	repeatedcv	13	V2+V3+V4+V5+V6+V7+V8+V9+V10+V11+V12+V13+V14	0.884391537795324	0.0663954744411142	0.858538903283498	0.0149599133431456	0.107230338481457	0.665424792711242	0.12406378151589	0.757966871323026	0.87061292852968	0.831305895354753	0.0807419040598166	0.842610139480465
129	svmRFE	2	repeatedcv	8	V5+V2+V6+V3+V10+V13+V7+V12	0.797500396935932	0.139785582674126	0.794071401418083	0.00874286962846151	0.0710730290709557	0.72317244770639	0.155988982214225	0.770292031075516	0.877662823113475	0.781197262697223	0.140022346502245	0.790220055988059
130	rfRFE	2	repeatedcv	13	V8+V7+V14+V12+V4+V3+V5+V13+V10+V9+V11+V6+V2	0.984194425065542	0.0474766169092865	0.934380958059267	0.0107872169086296	0.0389795538136357	0.866857705508987	0.0814885483111979	0.903684297602246	0.950623110176818	0.951072282804132	0.0454866263034219	0.954350944265711
131	rf	2	repeatedcv	13	V2+V3+V4+V5+V6+V7+V8+V9+V10+V11+V12+V13+V14	0.984294033014991	0.0501656489271541	0.926180267787287	0.0146122728546791	0.0602010618098311	0.876829701266515	0.0794640727042655	0.910898081767266	0.954409808084172	0.953379875434894	0.044506444883511	0.956503904400597
132	nnet	2	LOOCV	13	V2+V3+V4+V5+V6+V7+V8+V9+V10+V11+V12+V13+V14	0.824705271820625	0.0836354434339979	0.80140934170771	NA	NA	0.759592956682255	0.105782581366489	0.826088521855248	0.908894120266628	0.82008422129034	0.0838864840145468	0.832140433265729
133	nnet	2	repeatedcv	13	V2+V3+V4+V5+V6+V7+V8+V9+V10+V11+V12+V13+V14	0.946919662770337	0.0760994237420456	0.867166361800202	0.0385952627212576	0.084951070042725	0.845731054582482	0.0798920820260226	0.88840118842137	0.942550363864642	0.923945383668933	0.0533085397152979	0.929041827031324
134	svmRadial	2	LOOCV	13	V2+V3+V4+V5+V6+V7+V8+V9+V10+V11+V12+V13+V14	0.974338845802115	0.0651249145902581	0.882160769577813	NA	NA	0.813825651688801	0.0900931836209228	0.865320684200409	0.930226146805394	0.932189056228571	0.0514080720116468	0.936733088543151
135	svmRadial	2	repeatedcv	13	V2+V3+V4+V5+V6+V7+V8+V9+V10+V11+V12+V13+V14	0.974338845802115	0.0635739894212012	0.886972433917039	0.0222796615702399	0.0726502090676242	0.813825651688801	0.0900931836209228	0.865320684200409	0.930226146805394	0.932189056228571	0.0514080720116468	0.936733088543151
136	glmnet	2	LOOCV	9	V2+V5+V6+V7+V8+V10+V11+V12+V13	0.832588870059281	0.0839670731168345	0.79727241289285	NA	NA	0.824110526160285	0.0943045855326876	0.857791489235975	0.926170334893088	0.837860467056431	0.0796321915994746	0.845382404151751
137	glmnet	2	repeatedcv	10	V2+V5+V6+V7+V8+V9+V10+V11+V12+V13	0.83269637910241	0.0820682247330397	0.831423664865556	0.0198589103470127	0.0697169476502769	0.817286046736702	0.0946502578063149	0.856161355941659	0.925289876709812	0.837299057005527	0.0795164315824837	0.845685703551634
138	lasso.RMSE	2	repeatedcv	9	V2+V5+V6+V7+V8+V10+V11+V12+V13	0.833176380045566	0.0815115332390152	0.832424161510506	0.0197986695063972	0.0718252256503298	0.830276162857873	0.0917228629008832	0.862776472097855	0.928857616697982	0.840498009183471	0.0787252264768858	0.847897586077021
139	pls	2	LOOCV	13	V2+V3+V4+V5+V6+V7+V8+V9+V10+V11+V12+V13+V14	0.759256892937219	0.0927863726381196	0.75248613696746	NA	NA	0.725587867999665	0.111910295693924	0.801489095999758	0.895259233965089	0.764915493085626	0.0939797119512354	0.780668578600507
140	pls	2	repeatedcv	13	V2+V3+V4+V5+V6+V7+V8+V9+V10+V11+V12+V13+V14	0.759256892937219	0.0906704631882097	0.780805294727011	0.0202802816115303	0.078244156540632	0.725587867999665	0.111910295693924	0.801489095999758	0.895259233965089	0.764915493085626	0.0939797119512354	0.780668578600507
141	glmStepAIC	2	LOOCV	13	V2+V3+V4+V5+V6+V7+V8+V9+V10+V11+V12+V13+V14	0.835221234014303	0.0883596807439758	0.778507804656693	0	0	0.796785705704496	0.0917927532870528	0.852993914764955	0.923576696742049	0.838846030967546	0.077519559529855	0.849645008273844
142	glmStepAIC	2	repeatedcv	13	V2+V3+V4+V5+V6+V7+V8+V9+V10+V11+V12+V13+V14	0.835221234014303	0.0856996747411817	0.819374601561982	0.0220086716939318	0.0797366380155284	0.796785705704496	0.0917927532870528	0.852993914764955	0.923576696742049	0.838846030967546	0.077519559529855	0.849645008273844
143	lm	2	LOOCV	13	V2+V3+V4+V5+V6+V7+V8+V9+V10+V11+V12+V13+V14	0.835849786171436	0.0855514797235092	0.791835215058222	0	0	0.800914036394734	0.0911000200857159	0.855980366753638	0.925192070196042	0.840162392106423	0.0772210105878375	0.850873159645683
144	lm	2	repeatedcv	13	V2+V3+V4+V5+V6+V7+V8+V9+V10+V11+V12+V13+V14	0.835849786171436	0.0832283543877004	0.828107259579315	0.0212820480420092	0.0762150125063717	0.800914036394734	0.0911000200857159	0.855980366753638	0.925192070196042	0.840162392106423	0.0772210105878375	0.850873159645683
145	svmRFE	1	repeatedcv	13	V5+V3+V4+V13+V12+V6+V2+V7+V8+V10+V11+V9+V14	0.817768145892053	0.13894364608125	0.795212428232961	0.0118639565258576	0.0826765232889954	0.866103858572942	0.143799987956935	0.903138961520852	0.950336236034832	0.84602139019289	0.136802001485872	0.856339544458315
146	rfRFE	1	repeatedcv	13	V8+V7+V12+V14+V5+V4+V3+V13+V6+V10+V9+V11+V2	0.976922458859045	0.0560107185873812	0.91580327784971	0.0203162318808964	0.0482073214322582	0.954051927526849	0.0512714222153434	0.96676096884921	0.98324003623185	0.972342638118591	0.0359067682751065	0.974195966492087
147	rf	1	repeatedcv	13	V2+V3+V4+V5+V6+V7+V8+V9+V10+V11+V12+V13+V14	0.979634731456185	0.0564928596475939	0.902251600959346	0.0197513367986976	0.0699004502633958	0.957607644949282	0.0477658406993767	0.969333189963311	0.984547200475076	0.975114338670609	0.0331869781921119	0.976781934532888
148	nnet	1	LOOCV	13	V2+V3+V4+V5+V6+V7+V8+V9+V10+V11+V12+V13+V14	0.799212356393588	0.0885825136376257	0.770857680126701	NA	NA	0.8641774745049	0.0988926276172856	0.901745407088652	0.949602762784866	0.824552570689375	0.0846019727453659	0.836309357189572
149	nnet	1	repeatedcv	13	V2+V3+V4+V5+V6+V7+V8+V9+V10+V11+V12+V13+V14	0.9453205201062	0.0777467985578058	0.838435713887161	0.0300234445493045	0.0901021897342545	0.858325600246823	0.0774272155676243	0.897512136348766	0.947371171373061	0.926289175762852	0.0523652845130358	0.931228560892145
150	svmRadial	1	LOOCV	13	V2+V3+V4+V5+V6+V7+V8+V9+V10+V11+V12+V13+V14	0.979940007028972	0.0750941823352525	0.833603430225759	NA	NA	0.932896244783648	0.0559808983309159	0.951456857928596	0.975426500526101	0.968148591926066	0.0355235735779362	0.970282964632051
151	svmRadial	1	repeatedcv	13	V2+V3+V4+V5+V6+V7+V8+V9+V10+V11+V12+V13+V14	0.975358851499198	0.0734800054183747	0.821154871515195	0.0235057093662564	0.131073978330634	0.916590032309017	0.0625249430876163	0.93966087443631	0.969361065050743	0.96053333731046	0.0395034583487059	0.96317801058347
152	glmnet	1	LOOCV	10	V2+V3+V5+V6+V7+V8+V10+V11+V12+V13	0.816035848094162	0.0877058358233399	0.771801452025257	NA	NA	0.881680075012111	0.0858771636135499	0.906854527137194	0.952289098508008	0.842255581323142	0.0786199994163073	0.850386736925042
153	glmnet	1	repeatedcv	11	V2+V3+V5+V6+V7+V8+V10+V11+V12+V13+V14	0.810156352391518	0.0862897314810671	0.802904285642086	0.0244714843982171	0.0887064987411146	0.876101110330231	0.0901855789948724	0.905098722806134	0.951366765661979	0.836516924958029	0.0806208822618322	0.845786583852162
154	lasso.RMSE	1	repeatedcv	8	V5+V6+V7+V8+V10+V11+V12+V13	0.811908354114677	0.0845445294275633	0.803165240015946	0.022900140368373	0.0955498276532592	0.880827861736571	0.0894855837906651	0.901112481015453	0.949269445950649	0.837604094234742	0.0807752121088671	0.844300832616814
155	pls	1	LOOCV	13	V2+V3+V4+V5+V6+V7+V8+V9+V10+V11+V12+V13+V14	0.730836207583291	0.096605022534568	0.723182645193449	NA	NA	0.776462415637185	0.109841924919797	0.838291960248177	0.915582852749098	0.757288179012138	0.0959182157914112	0.773552373202046
156	pls	1	repeatedcv	13	V2+V3+V4+V5+V6+V7+V8+V9+V10+V11+V12+V13+V14	0.730836207583291	0.0928528038464777	0.757246329807165	0.0249650099572182	0.0872674727584448	0.776462415637185	0.109841924919797	0.838291960248177	0.915582852749098	0.757288179012138	0.0959182157914112	0.773552373202046
157	glmStepAIC	1	LOOCV	13	V2+V3+V4+V5+V6+V7+V8+V9+V10+V11+V12+V13+V14	0.811638169186845	0.0870038038299403	0.776135782853803	0	0	0.872828145834114	0.0821522766319767	0.908003339539572	0.952892092285151	0.840816196504259	0.0775973356291091	0.851483152408613
158	glmStepAIC	1	repeatedcv	13	V2+V3+V4+V5+V6+V7+V8+V9+V10+V11+V12+V13+V14	0.811638169186845	0.0866322985860649	0.802230017687642	0.023715079861391	0.0882293903672661	0.872828145834114	0.0821522766319767	0.908003339539572	0.952892092285151	0.840816196504259	0.0775973356291091	0.851483152408613
159	lm	1	LOOCV	13	V2+V3+V4+V5+V6+V7+V8+V9+V10+V11+V12+V13+V14	0.816125994733901	0.0887746998217536	0.767987276596382	0	0	0.86868271980955	0.0823983488408646	0.905004520713292	0.95131725555321	0.84310576941822	0.0769898230596508	0.853619300333494
160	lm	1	repeatedcv	13	V2+V3+V4+V5+V6+V7+V8+V9+V10+V11+V12+V13+V14	0.816125994733901	0.0864375133210693	0.799254694068102	0.0220037360076648	0.0912882449906288	0.86868271980955	0.0823983488408646	0.905004520713292	0.95131725555321	0.84310576941822	0.0769898230596508	0.853619300333494
