# Supplementary material for: A methodology for the design of experiments in computational intelligence with multiple regression models
Source: PeerJ. 2016 Dec 1;4:e2721. doi: 10.7717/peerj.2721 (PMC5136129; doi:10.7717/peerj.2721)
Supplement: Data S1 — Datailed results from UC Irvine Machine Learning Repository (Housing, Machine CPU, Wine Quality, Automobile and Parkinson) and the 3 Use Cases (Protein Corona, Gajewicz Metal Oxides and Aquatic Toxicity) [file peerj-04-2721-s001.zip › 4_automobile/RRegrsResBest.csv]

Averaged values for all spits:
RegrMeth	CVtype	adjR2.tr.Avg	RMSE.tr.Avg	R2.tr.Avg	RMSEsd.tr.Avg	R2sd.tr.Avg	adjR2.ts.Avg	RMSE.ts.Avg	R2.ts.Avg	corP.ts.Avg	adjR2.both.Avg	RMSE.both.Avg	R2.both.Avg	NoModelFeats.Avg
1	rfRFE	repeatedcv	0.982232333282102	0.0530658690474854	0.92528993835863	0.0152093141759002	0.0542721478004062	0.88566453781772	0.0580527901669478	0.914944653582412	0.95619171544839	0.965556821816726	0.0372684223491473	0.967773660494369	12.5
RRegr package | eNanoMapper
Regression method: rfRFE
Split no.: 10
CV type: repeatedcv
Training Set Summary:
net.c	V2	V3	V4	V5	V6	V7	V8	V9	V10	V11	V12	V13	V14
	Min. :0.0008192	Min. :0.0000	Min. :0.0000	Min. :0.0000	Min. :0.0000	Min. :0.0000	Min. :0.0000	Min. :0.0000	Min. :0.0000	Min. :0.0000	Min. :0.00000	Min. :0.0000	Min. :0.0000	Min. :0.0000
	1st Qu.:0.0697458	1st Qu.:0.4000	1st Qu.:0.2303	1st Qu.:0.4119	1st Qu.:0.3162	1st Qu.:0.3500	1st Qu.:0.2750	1st Qu.:0.1396	1st Qu.:0.4357	1st Qu.:0.4905	1st Qu.:0.09375	1st Qu.:0.1168	1st Qu.:0.2653	1st Qu.:0.1667
	Median :0.1285189	Median :0.6000	Median :0.3090	Median :0.4821	Median :0.4444	Median :0.5250	Median :0.3751	Median :0.2226	Median :0.5500	Median :0.5810	Median :0.12500	Median :0.2196	Median :0.3878	Median :0.3333
	Mean :0.2141168	Mean :0.5483	Mean :0.3690	Mean :0.5073	Mean :0.4884	Mean :0.5074	Mean :0.4302	Mean :0.2630	Mean :0.5690	Mean :0.5629	Mean :0.20357	Mean :0.2678	Mean :0.3826	Mean :0.3324
	3rd Qu.:0.2918053	3rd Qu.:0.8000	3rd Qu.:0.4752	3rd Qu.:0.6791	3rd Qu.:0.5769	3rd Qu.:0.6583	3rd Qu.:0.5842	3rd Qu.:0.3208	3rd Qu.:0.7500	3rd Qu.:0.6381	3rd Qu.:0.15000	3rd Qu.:0.3388	3rd Qu.:0.5510	3rd Qu.:0.4583
	Max. :1.0000000	Max. :1.0000	Max. :1.0000	Max. :1.0000	Max. :1.0000	Max. :1.0000	Max. :1.0000	Max. :1.0000	Max. :0.9000	Max. :1.0000	Max. :1.00000	Max. :1.0000	Max. :1.0000	Max. :0.9444
Test Set Summary:
net.c	V2	V3	V4	V5	V6	V7	V8	V9	V10	V11	V12	V13	V14
	Min. :0.00000	Min. :0.2000	Min. :0.0000	Min. :0.05224	Min. :0.2650	Min. :0.2000	Min. :0.08728	Min. :0.06792	Min. :0.1000	Min. :0.05714	Min. :0.0000	Min. :0.01869	Min. :0.02041	Min. :0.08333
	1st Qu.:0.05401	1st Qu.:0.4000	1st Qu.:0.2245	1st Qu.:0.37239	1st Qu.:0.3333	1st Qu.:0.3500	1st Qu.:0.21460	1st Qu.:0.13585	1st Qu.:0.3607	1st Qu.:0.51071	1st Qu.:0.1031	1st Qu.:0.09346	1st Qu.:0.29592	1st Qu.:0.24306
	Median :0.10777	Median :0.6000	Median :0.2828	Median :0.46194	Median :0.4274	Median :0.5250	Median :0.34600	Median :0.18491	Median :0.5357	Median :0.56190	Median :0.1250	Median :0.19626	Median :0.34694	Median :0.30556
	Mean :0.16419	Mean :0.5917	Mean :0.3263	Mean :0.45672	Mean :0.4439	Mean :0.4981	Mean :0.37027	Mean :0.22068	Mean :0.5479	Mean :0.55952	Mean :0.1878	Mean :0.22897	Mean :0.40264	Mean :0.37847
	3rd Qu.:0.21086	3rd Qu.:0.8000	3rd Qu.:0.4082	3rd Qu.:0.53657	3rd Qu.:0.5299	3rd Qu.:0.6438	3rd Qu.:0.50359	3rd Qu.:0.28113	3rd Qu.:0.7214	3rd Qu.:0.63452	3rd Qu.:0.1500	3rd Qu.:0.31776	3rd Qu.:0.55102	3rd Qu.:0.50000
	Max. :0.89859	Max. :1.0000	Max. :0.6822	Max. :0.78657	Max. :0.8547	Max. :1.0000	Max. :0.78627	Max. :0.55849	Max. :1.0000	Max. :0.87143	Max. :1.0000	Max. :0.62617	Max. :0.67347	Max. :1.00000
Predictors:
x
1	V8
2	V7
3	V14
4	V12
5	V5
6	V3
7	V4
8	V13
9	V10
10	V9
11	V11
12	V6
13	V2
Trainig Results:
RMSE	Rsquared
4	0.0473438815894435	0.945697371125068
Test Results:
x
RMSE	0.063141920836469
Rsquared	0.865684561728734
Full Statistics:
RegrMeth	Split.No	CVtype	NoModelFeats	ModelFeats	adjR2.tr	RMSE.tr	R2.tr	RMSEsd.tr	R2sd.tr	adjR2.ts	RMSE.ts	R2.ts	corP.ts	adjR2.both	RMSE.both	R2.both
1	rfRFE	10	repeatedcv	13	V8+V7+V14+V12+V5+V3+V4+V13+V10+V9+V11+V6+V2	0.985905009301875	0.0473438815894435	0.945697371125068	0.0135989664571806	0.0305705551573353	0.814328658860308	0.063141920836469	0.865684561728734	0.930421711767698	0.962625699363277	0.0378907537784377	0.965130162808006
V8
	x
1	1.87115355238396
V7
	x
1	1.36044267966125
V14
	x
1	0.871517360078496
V12
	x
1	0.694508369732722
V5
	x
1	0.436011805670377
V4
	x
1	0.262352705560834
V3
	x
1	0.248708021067421
V9
	x
1	0.136318043360024
V13
	x
1	0.0741294577464533
V11
	x
1	0.0697957462105374
V6
	x
1	0.0417014820755947
V10
	x
1	0.04124673972374
V2
	x
1	0.0236373714519001
Residuals of the fitted model:
resids
3	0.00258299890533641
5	0.020318627840392
6	0.00161683464905739
7	-0.00607388512179619
8	-0.0129990698906038
9	-0.0094172792526967
10	-0.0373336709531135
11	0.0480602154808599
13	0.00288466280973108
15	0.024133110263121
16	-0.0402574003276893
17	0.00330700265509107
18	-0.0232053233040398
19	0.00687297772923118
20	-0.0354660476970689
21	0.0511968610581113
23	0.0065878510075397
24	0.000707597272561922
25	0.00888933412300427
26	0.00451783994269017
28	0.0111047964233108
30	-0.00503391620819257
31	0.00518492154122962
33	-0.00860346143025031
35	-0.0108150286905884
36	0.0639435670191812
37	-0.0411720079392643
38	-0.0142422661900271
39	-0.000614873238903912
41	0.0104077354649722
42	0.00353081194247296
43	0.00807032090429144
44	0.0054616818099068
45	-0.0112658924280793
48	-0.0142585894444162
49	-0.0203522100003061
51	-0.0198359017734495
52	0.00683796831543965
53	-0.00196514903265309
54	-0.0474529219006009
55	0.0109684565480033
57	0.00876303910604806
58	-0.0780688727802328
60	0.00145807060225404
61	0.0321778293335016
62	0.0215883680908182
63	-0.0521331173559735
64	-0.0292759296956457
65	0.00757456136617796
66	-0.0123549062443112
67	0.0146693998973896
68	-0.0195115236392955
69	0.0033201136747833
70	-0.0175795886618388
71	0.0387414386905649
72	0.0124332245762612
73	-0.00158214977267419
74	0.00519731559174497
78	0.0205375510980915
79	-6.83233205899456e-05
80	0.00510628757734155
82	-0.00352166570913161
83	-0.0122391451378891
84	0.0137659541896298
85	-0.00603002416298443
87	-0.00777485335527393
88	-0.00479009400393904
89	-0.0226261740838201
91	0.00862672906012624
96	0.0233365489962433
97	-0.000906313820896044
99	0.0116596637357423
100	-0.0218553536707627
102	-0.000303370168880907
103	0.00266099829535116
104	0.0317381270377178
105	-0.00433970673419064
108	0.0156276492395284
109	0.0175372912632607
110	-0.0174673692137102
111	0.0409623711169586
114	-0.00609341936963452
115	-0.000614873238903912
116	0.0392318391057332
117	-0.00348108099801155
118	0.0049616089899549
120	-0.018322603029594
121	0.0115069398242391
123	-0.00134738179170205
124	-0.00564832679608761
128	-0.010301479450824
129	0.0188056452013316
130	-0.0508079091216445
131	-0.0157736085596546
132	0.0371336283959988
133	-0.000318521092961196
134	0.0126462216374556
135	0.0068391740609655
138	0.00902504722657646
140	0.0003856510411126
141	-0.0187708490853764
142	0.05761630569958
143	0.000910257683332583
144	0.0238245566376096
145	-0.00166168303145364
146	-0.0307255856922983
147	0.0609054599005578
148	-0.0087765453552455
149	-0.0133728016885724
150	0.00181680899657415
151	-0.00253103607661098
152	0.00351842864945034
153	-0.0394390347455209
154	0.00726140708008546
155	-0.00111854591794507
156	-0.045556097134252
158	-0.0131043655325197
159	0.00410386223552528
160	0.00141150307002306
161	0.00180309071049111
162	0.000493503301723014
163	0.00410386223552528
164	-0.0130574326001691
165	0.0298944175704149
167	0.00804564818032857
168	0.0102747440071307
170	0.0322770244774342
171	0.0268109797357204
172	-0.000452110123628724
173	-0.0201606747430614
174	-0.118768957658035
177	0.0171434379292655
178	-0.0121319811992124
179	0.034341676182911
181	0.00613423944524433
183	0.0110919633252238
185	-0.00585408370984561
186	-0.00566123413269787
187	-0.0157746216948293
188	-0.0770276298523973
189	0.00636571220514411
190	-0.0118683911755459
191	-0.00258659238085779
192	-0.00177176445740075
193	-0.00944646905979531
194	-0.0191707917514856
195	0.0242752202921784
1	0.00136678913658705
2	-0.121849596810739
4	-0.0683223582079672
12	-0.00197485938419854
14	-0.0225807935010556
22	0.10152480015888
27	0.000434165029399886
29	0.0239589822702329
32	-0.00586465560654519
34	0.0834168838261685
40	0.013256346093375
46	0.0261202911143106
47	0.0195471035154543
50	0.00756290201697088
56	0.0230022071380888
59	-0.130431017989838
75	-0.0110218628366984
76	-0.232335128179667
77	0.0859585513794422
81	0.00998481816290393
86	0.0115073887426973
90	0.0113012124049262
92	-0.0191040699181879
93	-0.0130895006868245
94	-0.0642034117802824
95	-0.0330679390061967
98	0.0113980106912933
101	0.0511686566846588
106	0.0810645855055192
107	-0.0155743979941412
112	0.061575147708654
113	0.0352965552773581
119	-0.00976621351219931
122	0.0419953248644674
125	-0.00832479436638368
126	0.0262320887741423
127	0.0146097656757952
136	-0.0402852308290047
137	0.00414128914959078
139	0.0760163839126087
157	0.0169037668957658
166	0.0135318173543187
169	-0.0139834307418415
175	0.0257174403786638
176	0.0314864466227383
180	0.06626921536501
182	-0.124035560764862
184	-0.141719010972643
Leverage output:
Mean of hat values: 0.0907009756884162
Leverage / Hat values with warnings (X3 & X2 = values 3 & 2 times than hat mean):
hat.fit	warn
1	0.0441584411959576	-
2	0.0701722063514053	-
4	0.0533851738772378	-
12	0.101842115537717	-
14	0.0411472006933514	-
22	0.0663180105248505	-
27	0.0749638117134631	-
29	0.116777077174675	-
32	0.0425191290933079	-
34	0.177079784734491	-
40	0.158397148921768	-
46	0.0924413532219646	-
47	0.0907648100250254	-
50	0.0574309593720017	-
56	0.0415226234333837	-
59	0.133226044618675	-
75	0.117952195906397	-
76	0.239657474085686	x2
77	0.0648504641511239	-
81	0.062298351252182	-
86	0.0487119790213718	-
90	0.0678435639734156	-
92	0.0922529994156981	-
93	0.109027846153509	-
94	0.119381627970659	-
95	0.0207606930746749	-
98	0.0720727152041521	-
101	0.150968901494099	-
106	0.0950350260113415	-
107	0.0359617028302116	-
112	0.0697936115286937	-
113	0.037784684220676	-
119	0.0280487019682036	-
122	0.0385406138714416	-
125	0.314853586483718	x3
126	0.0491674787245059	-
127	0.10353522006388	-
136	0.156651614615376	-
137	0.0806498786891899	-
139	0.0920118146686789	-
157	0.0712077873504195	-
166	0.113710996890179	-
169	0.0452358099095328	-
175	0.0378282195118115	-
176	0.0708823596145196	-
180	0.113743602429681	-
182	0.170907602959217	-
184	0.100171818510459	-
Leverage Threshold: 0.26530612244898
Points with leverage > threshold:
hat.fit.hat.fit...thresh.lever.
125	0.314853586483718
