# Supplementary material for: A methodology for the design of experiments in computational intelligence with multiple regression models
Source: PeerJ. 2016 Dec 1;4:e2721. doi: 10.7717/peerj.2721 (PMC5136129; doi:10.7717/peerj.2721)
Supplement: Data S1 — Datailed results from UC Irvine Machine Learning Repository (Housing, Machine CPU, Wine Quality, Automobile and Parkinson) and the 3 Use Cases (Protein Corona, Gajewicz Metal Oxides and Aquatic Toxicity) [file peerj-04-2721-s001.zip › 4_automobile/RRegsResAvgs.csv]

	RegrMeth	CVtype	adjR2.tr.Avg	RMSE.tr.Avg	R2.tr.Avg	RMSEsd.tr.Avg	R2sd.tr.Avg	adjR2.ts.Avg	RMSE.ts.Avg	R2.ts.Avg	corP.ts.Avg	adjR2.both.Avg	RMSE.both.Avg	R2.both.Avg	NoModelFeats.Avg
1	rf	repeatedcv	0.983424683492051	0.0529184461039813	0.922127801600197	0.0155971108381207	0.0603030756085939	0.883741216116586	0.0584270225805464	0.915897901020509	0.956723055131726	0.966377096471078	0.0365882879396289	0.968630177635387	13
2	rfRFE	repeatedcv	0.982232333282102	0.0530658690474854	0.92528993835863	0.0152093141759002	0.0542721478004062	0.88566453781772	0.0580527901669478	0.914944653582412	0.95619171544839	0.965556821816726	0.0372684223491473	0.967773660494369	12.5
3	svmRadial	repeatedcv	0.97519187909198	0.0656188585544249	0.879866735452312	0.0203583265272163	0.0890283733879647	0.79899626846976	0.07457885979002	0.854593045275997	0.923630576139595	0.945729999155755	0.0452338942835987	0.949366648696864	13
4	lasso.RMSE	repeatedcv	0.843615127184856	0.0818493872212516	0.836346918859916	0.0215547241063061	0.0860133878303071	0.7856800105078	0.0841167109380436	0.829502329297705	0.910250108838491	0.840672965882606	0.0782025552123873	0.848381374977784	9.4
5	glmnet	repeatedcv	0.840442920112942	0.0829573259126774	0.834640814603142	0.0223869290428243	0.0847791987941997	0.782663783664592	0.0847987873547502	0.827917444677002	0.9093674297794	0.837519304027836	0.0790494838892316	0.84563761830432	9.7
6	lm	repeatedcv	0.845089967576418	0.0833970063983577	0.832018927845638	0.0227689307914345	0.0884074214207234	0.756286765227574	0.0851230264269672	0.823696808888032	0.906970102649203	0.840095978989205	0.077412531274778	0.85081119689199	13
7	glmStepAIC	repeatedcv	0.842674892451692	0.0830900249584432	0.833319859897593	0.0230587979832517	0.0885347419154613	0.756107354564149	0.0850979034830279	0.823567022450661	0.906891126979725	0.838365045769773	0.0778381701516743	0.849196254042932	13
8	nnet	repeatedcv	0.898090118806698	0.0765613218428452	0.856543951398114	0.0255608711403712	0.0874996445310053	0.728555384741982	0.0938605488928891	0.803635810238881	0.895636878285298	0.86645291034589	0.0703263300040267	0.875401942126835	13
9	pls	repeatedcv	0.752980976136979	0.0961781200873862	0.772294065374254	0.0224539104232101	0.0867684450405624	0.701264255772517	0.0978764321580819	0.783893291409906	0.884930761461239	0.759696761769036	0.0948506375941554	0.775799556083482	13
10	svmRFE	repeatedcv	0.776342439732444	0.142113639333241	0.773071360684057	0.0189413925700391	0.11740732928236	0.587108443135292	0.155439371990525	0.637325145200405	0.78277954394921	0.743089470994106	0.140721361797643	0.751218113011646	6.9
