# Supplementary material for: A methodology for the design of experiments in computational intelligence with multiple regression models
Source: PeerJ. 2016 Dec 1;4:e2721. doi: 10.7717/peerj.2721 (PMC5136129; doi:10.7717/peerj.2721)
Supplement: Data S1 — Datailed results from UC Irvine Machine Learning Repository (Housing, Machine CPU, Wine Quality, Automobile and Parkinson) and the 3 Use Cases (Protein Corona, Gajewicz Metal Oxides and Aquatic Toxicity) [file peerj-04-2721-s001.zip › 5_parkinson/RRegrsResAllSplits.csv]

	RegrMeth	Split.No	CVtype	NoModelFeats	ModelFeats	adjR2.tr	RMSE.tr	R2.tr	RMSEsd.tr	R2sd.tr	adjR2.ts	RMSE.ts	R2.ts	corP.ts	adjR2.both	RMSE.both	R2.both
1	svmRFE	10	repeatedcv	12	V3+V19+V4+V17+V2+V18+V20+V6+V15+V14+V16+V7	0.506186278958332	0.172971188492818	0.474931858236724	0.00425519150604677	0.0220250093467944	0.479895090656584	0.173501368316811	0.484149527542829	0.69580854230372	0.500231669464833	0.169654975785651	0.501252646646723
2	rfRFE	10	repeatedcv	12	V2+V19+V4+V3+V6+V18+V17+V20+V16+V15+V7+V14	0.986107658426395	0.0853795577715179	0.898038844399377	0.00439430217393775	0.0106418821831163	0.903158963058834	0.0828606103830592	0.903951118780235	0.950763439968237	0.964076972897585	0.0516402730521425	0.964150360082677
3	rf	10	repeatedcv	12	V2+V3+V4+V6+V7+V14+V15+V16+V17+V18+V19+V20	0.996239200670856	0.03916395439966	0.973168057431122	0.00400463961649321	0.00578288222492816	0.970419168729547	0.0410617294980859	0.970661138719489	0.985221365338516	0.989742767507513	0.0242964699278766	0.989763722017202
4	nnet	10	LOOCV	12	V2+V3+V4+V6+V7+V14+V15+V16+V17+V18+V19+V20	0.555519512037494	0.159574821547001	0.540399939649851	NA	NA	0.525423842498264	0.162942847201179	0.52930585605656	0.727534092710823	0.548716408512699	0.158244847975086	0.549638336176616
5	nnet	10	repeatedcv	12	V2+V3+V4+V6+V7+V14+V15+V16+V17+V18+V19+V20	0.587988505484252	0.160173956354326	0.538288550643332	0.00700999741780895	0.0384314776095821	0.556217042445155	0.157576080640456	0.559847168887322	0.748229355804303	0.580695521582774	0.152577459043122	0.581552119087202
6	svmRadial	10	LOOCV	12	V2+V3+V4+V6+V7+V14+V15+V16+V17+V18+V19+V20	0.72003375711477	0.140225976239327	0.644897800551644	NA	NA	0.631735861720854	0.143669193503707	0.63474824731005	0.796710893178981	0.69774537998262	0.129624279727736	0.698362856223718
7	svmRadial	10	repeatedcv	12	V2+V3+V4+V6+V7+V14+V15+V16+V17+V18+V19+V20	0.72003375711477	0.142216806134649	0.635284228189772	0.00557783482087094	0.0275136545034748	0.631735861720854	0.143669193503707	0.63474824731005	0.796710893178981	0.69774537998262	0.129624279727736	0.698362856223718
8	glmnet	10	LOOCV	11	V2+V3+V4+V6+V7+V14+V15+V16+V17+V19+V20	0.148763103608681	0.217469478341047	0.145811343268733	NA	NA	0.151435369552782	0.217879217879369	0.157798158192808	0.39723816306192	0.151024536065007	0.217092079927019	0.152614377757769
9	glmnet	10	repeatedcv	11	V2+V3+V4+V6+V7+V14+V15+V16+V17+V19+V20	0.148641479541385	0.217596537734718	0.147078101790007	0.00415493526444414	0.0233714655493475	0.151666725890215	0.217869375669567	0.158027779751979	0.397527080526572	0.150990751970022	0.217108267024638	0.15258065692888
10	lasso.RMSE	10	repeatedcv	11	V2+V3+V4+V6+V7+V14+V15+V16+V17+V19+V20	0.148703742543662	0.217607774007505	0.147156132928262	0.00418617203656697	0.023470690346747	0.151460411005314	0.217883931686793	0.157823011877121	0.397269444932682	0.150986114453275	0.217101813459764	0.152576028096621
11	pls	10	LOOCV	12	V2+V3+V4+V6+V7+V14+V15+V16+V17+V18+V19+V20	0.110055149189108	0.221992309951533	0.109799703244357	NA	NA	0.127824874051063	0.220853841480385	0.134959230909541	0.367367977523274	0.116181262006955	0.221455973738884	0.117986816119301
12	pls	10	repeatedcv	12	V2+V3+V4+V6+V7+V14+V15+V16+V17+V18+V19+V20	0.110055149189108	0.221909972153916	0.111900672565109	0.0042037613938613	0.0217581534089199	0.127824874051063	0.220853841480385	0.134959230909541	0.367367977523274	0.116181262006955	0.221455973738884	0.117986816119301
13	glmStepAIC	10	LOOCV	12	V2+V3+V4+V6+V7+V14+V15+V16+V17+V18+V19+V20	0.148874583806309	0.217716485121584	0.143990381027951	0	0	0.150260376163757	0.217887722073489	0.157211211532561	0.396498690455039	0.150960135228208	0.217048297304256	0.152694639548477
14	glmStepAIC	10	repeatedcv	12	V2+V3+V4+V6+V7+V14+V15+V16+V17+V18+V19+V20	0.148874583806309	0.217682462225351	0.147598068738069	0.00448340622081534	0.0241563447480629	0.150260376163757	0.217887722073489	0.157211211532561	0.396498690455039	0.150960135228208	0.217048297304256	0.152694639548477
15	lm	10	LOOCV	12	V2+V3+V4+V6+V7+V14+V15+V16+V17+V18+V19+V20	0.148890187356807	0.217770834519432	0.143582118872104	0	0	0.149715398732023	0.217954954926361	0.156670691993929	0.395816487774232	0.150838545688016	0.217063675394972	0.152573298403669
16	lm	10	repeatedcv	12	V2+V3+V4+V6+V7+V14+V15+V16+V17+V18+V19+V20	0.148890187356807	0.217735809425691	0.147191877607725	0.00447530741244475	0.024078180781775	0.149715398732023	0.217954954926361	0.156670691993929	0.395816487774232	0.150838545688016	0.217063675394972	0.152573298403669
17	svmRFE	9	repeatedcv	12	V3+V19+V4+V17+V18+V2+V20+V15+V14+V6+V16+V7	0.507057023602049	0.172810505092924	0.474810673065663	0.00297604076609493	0.0250713832833309	0.465022041949702	0.174295312067259	0.469398139766064	0.685126367735226	0.497526226273406	0.1694425915532	0.498552730407679
18	rfRFE	9	repeatedcv	12	V2+V19+V4+V3+V6+V18+V20+V15+V17+V16+V7+V14	0.985986798898541	0.0867914937474361	0.893716749520917	0.00351008623652863	0.00985652768658265	0.900487464517716	0.0837033213106572	0.901301472987919	0.949368986742204	0.963366075427944	0.0519886487153405	0.96344091490613
19	rf	9	repeatedcv	12	V2+V3+V4+V6+V7+V14+V15+V16+V17+V18+V19+V20	0.995620771017163	0.0419864262245572	0.969307143502341	0.00452307392580708	0.00708920923389312	0.970273082977459	0.0413668989505438	0.970516247942878	0.985147830502041	0.98926781518988	0.0250455013305796	0.989289739980095
20	nnet	9	LOOCV	12	V2+V3+V4+V6+V7+V14+V15+V16+V17+V18+V19+V20	0.576112544528138	0.157181781885896	0.555002177031154	NA	NA	0.545687472490402	0.159429797304765	0.549403730384141	0.741217734801416	0.569343580568678	0.155168022364805	0.570223368963839
21	nnet	9	repeatedcv	12	V2+V3+V4+V6+V7+V14+V15+V16+V17+V18+V19+V20	0.550060979714271	0.15959297938807	0.542197163468836	0.00776267611780056	0.0421931623360407	0.53417104739467	0.160811450771439	0.537981509174673	0.733472227950502	0.546950160436941	0.158575697867815	0.547875696370675
22	svmRadial	9	LOOCV	12	V2+V3+V4+V6+V7+V14+V15+V16+V17+V18+V19+V20	0.720746044856978	0.140751798899582	0.643151044703524	NA	NA	0.618274247611619	0.145471779377143	0.621396748653651	0.788287224718028	0.695470740393347	0.130114985060729	0.696092863497752
23	svmRadial	9	repeatedcv	12	V2+V3+V4+V6+V7+V14+V15+V16+V17+V18+V19+V20	0.720746044856978	0.142073329809609	0.636891605497048	0.00627567956546176	0.0295814946099202	0.618274247611619	0.145471779377143	0.621396748653651	0.788287224718028	0.695470740393347	0.130114985060729	0.696092863497752
24	glmnet	9	LOOCV	11	V2+V3+V4+V6+V7+V14+V15+V16+V17+V19+V20	0.147497720638673	0.217865713408918	0.144881862253767	NA	NA	0.153214449446384	0.216884014437261	0.159563898019042	0.399454500561756	0.150441673304032	0.2171899138776	0.152032606500092
25	glmnet	9	repeatedcv	11	V2+V3+V4+V6+V7+V14+V15+V16+V17+V19+V20	0.147502102240257	0.2179247742165	0.145793064276277	0.00430722337473866	0.0238835008792499	0.15323294762469	0.216878851886674	0.159582257492535	0.399477480582492	0.150449579673105	0.217187000596497	0.15204049806323
26	lasso.RMSE	9	repeatedcv	11	V2+V3+V4+V6+V7+V14+V15+V16+V17+V19+V20	0.147757906167419	0.217964372511986	0.145581042637517	0.004374013693758	0.0241312609415871	0.153657064956507	0.216801952676664	0.160003194667126	0.400003993313975	0.150744016839283	0.217133057050328	0.152334383848947
27	pls	9	LOOCV	12	V2+V3+V4+V6+V7+V14+V15+V16+V17+V18+V19+V20	0.112137993095529	0.222030367254585	0.111827772784924	NA	NA	0.12120602904236	0.220783971309084	0.128394527782299	0.358321821526822	0.116105561484174	0.221461876862621	0.117911270245187
28	pls	9	repeatedcv	12	V2+V3+V4+V6+V7+V14+V15+V16+V17+V18+V19+V20	0.112137993095529	0.221937286211744	0.11381297031545	0.00421617128350063	0.0218175686949094	0.12120602904236	0.220783971309084	0.128394527782299	0.358321821526822	0.116105561484174	0.221461876862621	0.117911270245187
29	glmStepAIC	9	LOOCV	12	V2+V3+V4+V6+V7+V14+V15+V16+V17+V18+V19+V20	0.147942761354915	0.2180699156552	0.143403934096192	0	0	0.154051145271715	0.216610256454549	0.160970972304258	0.401211879565221	0.151114848778422	0.217031208146428	0.152849037034237
30	glmStepAIC	9	repeatedcv	12	V2+V3+V4+V6+V7+V14+V15+V16+V17+V18+V19+V20	0.147942761354915	0.217996699860395	0.145971537349962	0.00461241086094422	0.0247790589430606	0.154051145271715	0.216610256454549	0.160970972304258	0.401211879565221	0.151114848778422	0.217031208146428	0.152849037034237
31	lm	9	LOOCV	12	V2+V3+V4+V6+V7+V14+V15+V16+V17+V18+V19+V20	0.147943601559933	0.218132397251532	0.142933270580652	0	0	0.154151255648759	0.216598030117501	0.161070263782511	0.401335599944126	0.151139605316478	0.217028078740075	0.152873742997139
32	lm	9	repeatedcv	12	V2+V3+V4+V6+V7+V14+V15+V16+V17+V18+V19+V20	0.147943601559933	0.218054066535959	0.145550654684852	0.0046156193087624	0.0248158100605701	0.154151255648759	0.216598030117501	0.161070263782511	0.401335599944126	0.151139605316478	0.217028078740075	0.152873742997139
33	svmRFE	8	repeatedcv	12	V3+V19+V17+V4+V20+V2+V18+V6+V7+V15+V14+V16	0.509160850432089	0.172686904375475	0.478758000267002	0.0039729211078233	0.0360254122311902	0.45446804588326	0.174936116198593	0.45893047495579	0.677444075149964	0.496829554317828	0.169965256068599	0.497857481683879
34	rfRFE	8	repeatedcv	12	V2+V19+V4+V6+V3+V18+V20+V15+V17+V7+V16+V14	0.986042406334877	0.0865013207370393	0.894622848125371	0.00356426665333138	0.0127471504317438	0.896590863146657	0.0860412612446107	0.897436745656705	0.947331381121044	0.962106818810907	0.0528390918145392	0.962184230825593
35	rf	8	repeatedcv	12	V2+V3+V4+V6+V7+V14+V15+V16+V17+V18+V19+V20	0.995351263182052	0.0429926364903183	0.968071328410932	0.00421944559722233	0.00673565647057342	0.967600438190159	0.0434385935100496	0.967865465280628	0.9838015375474	0.988404618616255	0.0261614596998747	0.988428306831543
36	nnet	8	LOOCV	12	V2+V3+V4+V6+V7+V14+V15+V16+V17+V18+V19+V20	0.56698639652399	0.158866263389166	0.546920462444869	NA	NA	0.514188431677628	0.163394887092486	0.518162350436912	0.719834946662714	0.554805019824914	0.157171348694964	0.555714509059184
37	nnet	8	repeatedcv	12	V2+V3+V4+V6+V7+V14+V15+V16+V17+V18+V19+V20	0.569511191105092	0.158177972352545	0.551253827059036	0.00748579158139297	0.0428287629719114	0.52105283852637	0.16300795352605	0.524970606718384	0.724548553734243	0.558607726115263	0.157012377058218	0.559509446797356
38	svmRadial	8	LOOCV	12	V2+V3+V4+V6+V7+V14+V15+V16+V17+V18+V19+V20	0.715870323006495	0.142214987028344	0.636693010418613	NA	NA	0.618611638911274	0.145001159218211	0.621731380106273	0.788499448386791	0.692210322424155	0.130885096574978	0.692839106239428
39	svmRadial	8	repeatedcv	12	V2+V3+V4+V6+V7+V14+V15+V16+V17+V18+V19+V20	0.715870323006495	0.142747629657507	0.634516160961197	0.00612689632981218	0.0320208114589308	0.618611638911274	0.145001159218211	0.621731380106273	0.788499448386791	0.692210322424155	0.130885096574978	0.692839106239428
40	glmnet	8	LOOCV	12	V2+V3+V4+V6+V7+V14+V15+V16+V17+V18+V19+V20	0.152051997409748	0.217698360463102	0.148395890755612	0	0	0.137882477044406	0.21756472130584	0.144934563121752	0.380702722766402	0.150628840578896	0.217101889533808	0.152364021701308
41	glmnet	8	repeatedcv	12	V2+V3+V4+V6+V7+V14+V15+V16+V17+V18+V19+V20	0.152079744989687	0.217651374711724	0.150851193369903	0.00476699370987731	0.03233323390579	0.137736173682339	0.217586110187106	0.144789456515204	0.380512097725162	0.150608629519977	0.217103616609908	0.152343851931581
42	lasso.RMSE	8	repeatedcv	12	V2+V3+V4+V6+V7+V14+V15+V16+V17+V18+V19+V20	0.151945537041172	0.217714845979157	0.15052184830799	0.00483273280479912	0.0325160795098639	0.138071122747556	0.217534925611337	0.145121665710766	0.380948376700527	0.150603236143607	0.217109112823263	0.152338469573345
43	pls	8	LOOCV	12	V2+V3+V4+V6+V7+V14+V15+V16+V17+V18+V19+V20	0.112852993900202	0.222215477484254	0.112668735203159	NA	NA	0.113382263239794	0.220786408917152	0.120634760064008	0.347325150347637	0.115022519833014	0.221613218577453	0.116830441140811
44	pls	8	repeatedcv	12	V2+V3+V4+V6+V7+V14+V15+V16+V17+V18+V19+V20	0.112852993900202	0.222135157851989	0.115141133745778	0.00452828067981612	0.0278907340036054	0.113382263239794	0.220786408917152	0.120634760064008	0.347325150347637	0.115022519833014	0.221613218577453	0.116830441140811
45	glmStepAIC	8	LOOCV	12	V2+V3+V4+V6+V7+V14+V15+V16+V17+V18+V19+V20	0.15217578986851	0.217861506043433	0.147276392606248	0	0	0.134764697046608	0.218081776478228	0.14184228643682	0.376619551320454	0.149847562264272	0.217206849767802	0.151584339460872
46	glmStepAIC	8	repeatedcv	12	V2+V3+V4+V6+V7+V14+V15+V16+V17+V18+V19+V20	0.15217578986851	0.217751596077752	0.150745616302228	0.00501201216732276	0.0329549038061583	0.134764697046608	0.218081776478228	0.14184228643682	0.376619551320454	0.149847562264272	0.217206849767802	0.151584339460872
47	lm	8	LOOCV	12	V2+V3+V4+V6+V7+V14+V15+V16+V17+V18+V19+V20	0.152331773061769	0.217918497794599	0.146857056009864	0	0	0.134902041997805	0.218067155158984	0.141978507911933	0.376800355509298	0.149994902979913	0.21718823297418	0.15173137917403
48	lm	8	repeatedcv	12	V2+V3+V4+V6+V7+V14+V15+V16+V17+V18+V19+V20	0.152331773061769	0.217762416982581	0.150684465766937	0.00501758051118052	0.0329907999876382	0.134902041997805	0.218067155158984	0.141978507911933	0.376800355509298	0.149994902979913	0.21718823297418	0.15173137917403
49	svmRFE	7	repeatedcv	12	V3+V19+V4+V20+V17+V18+V2+V15+V6+V14+V7+V16	0.506866910966799	0.173780630749583	0.47747920674174	0.00345503684278487	0.0296109258742736	0.458107441142304	0.17048427527968	0.462540100110465	0.680103006985313	0.495949060227319	0.169650875606411	0.496978786355557
50	rfRFE	7	repeatedcv	12	V2+V19+V4+V6+V3+V18+V20+V15+V17+V7+V16+V14	0.986149685830205	0.0873059541601714	0.893831288038508	0.00291108736199999	0.00951722029677904	0.905339000491397	0.0804637328086354	0.906113323595762	0.951899849561792	0.965521717583852	0.0506090628141604	0.965592153298696
51	rf	7	repeatedcv	12	V2+V3+V4+V6+V7+V14+V15+V16+V17+V18+V19+V20	0.995942563829447	0.0406099518449875	0.971729665839266	0.0049151936444408	0.00734541173437203	0.978027884077524	0.0348778604889901	0.978207615087114	0.989043788255664	0.991656365670648	0.0221730559060199	0.99167341088889
52	nnet	7	LOOCV	12	V2+V3+V4+V6+V7+V14+V15+V16+V17+V18+V19+V20	0.581899813348384	0.159843403563201	0.547546497167156	NA	NA	0.551644666014988	0.154345167464671	0.555312194309344	0.745192722931017	0.575027325177716	0.153595055050146	0.575895502245791
53	nnet	7	repeatedcv	12	V2+V3+V4+V6+V7+V14+V15+V16+V17+V18+V19+V20	0.567756944551931	0.158988328491526	0.552906231845375	0.00761772406944246	0.0419074465513861	0.524820226449862	0.158850414326147	0.528707177562747	0.727122532701846	0.557923707070796	0.156630752059406	0.558826825136024
54	svmRadial	7	LOOCV	12	V2+V3+V4+V6+V7+V14+V15+V16+V17+V18+V19+V20	0.724277855357665	0.14106575040134	0.646937348772191	NA	NA	0.636254459907078	0.138789645238246	0.63922988354792	0.799518532335505	0.703304933108929	0.128409563278339	0.703911051733834
55	svmRadial	7	repeatedcv	12	V2+V3+V4+V6+V7+V14+V15+V16+V17+V18+V19+V20	0.724277855357665	0.14233492972358	0.641036837442424	0.00607112898147784	0.0291890832667531	0.636254459907078	0.138789645238246	0.63922988354792	0.799518532335505	0.703304933108929	0.128409563278339	0.703911051733834
56	glmnet	7	LOOCV	12	V2+V3+V4+V6+V7+V14+V15+V16+V17+V18+V19+V20	0.151239949946623	0.218772737502277	0.150763476071134	NA	NA	0.129106241801591	0.214629971398267	0.136230117124277	0.369093642757874	0.147619100322977	0.217585200844492	0.149360430046526
57	glmnet	7	repeatedcv	12	V2+V3+V4+V6+V7+V14+V15+V16+V17+V18+V19+V20	0.153423725947666	0.218751468337658	0.152737284438432	0.00439288013130762	0.0271401946103686	0.132120764062361	0.214243554380642	0.139219980716247	0.373121938133162	0.150008181113889	0.217192834787033	0.151744630182094
58	lasso.RMSE	7	repeatedcv	12	V2+V3+V4+V6+V7+V14+V15+V16+V17+V18+V19+V20	0.153730906409751	0.218787897823384	0.152480969522268	0.00440155324689986	0.0266324749976607	0.132670860997241	0.214180356004947	0.139765577880699	0.373852347699862	0.150375081886867	0.217134118101754	0.152110781413145
59	pls	7	LOOCV	12	V2+V3+V4+V6+V7+V14+V15+V16+V17+V18+V19+V20	0.117397186475071	0.223053432902225	0.117163585426238	NA	NA	0.103975827350779	0.217706329148396	0.111305268435844	0.333624442203871	0.115976563722592	0.221476593413104	0.11778253601325
60	pls	7	repeatedcv	12	V2+V3+V4+V6+V7+V14+V15+V16+V17+V18+V19+V20	0.117397186475071	0.222972014704709	0.119362812659963	0.00426090584360008	0.0250896834659666	0.103975827350779	0.217706329148396	0.111305268435844	0.333624442203871	0.115976563722592	0.221476593413104	0.11778253601325
61	glmStepAIC	7	LOOCV	12	V2+V3+V4+V6+V7+V14+V15+V16+V17+V18+V19+V20	0.154074578229143	0.218898730353216	0.149890715603126	0	0	0.133820541041881	0.214073450851642	0.140905853589596	0.375374284667445	0.150918404796596	0.21705685676087	0.152652994368003
62	glmStepAIC	7	repeatedcv	12	V2+V3+V4+V6+V7+V14+V15+V16+V17+V18+V19+V20	0.154074578229143	0.218787783744463	0.153008697990776	0.00453440970487438	0.0269537017469256	0.133820541041881	0.214073450851642	0.140905853589596	0.375374284667445	0.150918404796596	0.21705685676087	0.152652994368003
63	lm	7	LOOCV	12	V2+V3+V4+V6+V7+V14+V15+V16+V17+V18+V19+V20	0.154120927041333	0.218960257198065	0.14943313395526	0	0	0.134238590254247	0.214020557562539	0.141320483176503	0.375926167187791	0.151055026016049	0.217039321670854	0.152789336483841
64	lm	7	repeatedcv	12	V2+V3+V4+V6+V7+V14+V15+V16+V17+V18+V19+V20	0.154120927041333	0.218848691986542	0.152572282700194	0.00454903990839791	0.0270126692191662	0.134238590254247	0.214020557562539	0.141320483176503	0.375926167187791	0.151055026016049	0.217039321670854	0.152789336483841
65	svmRFE	6	repeatedcv	12	V3+V19+V4+V17+V18+V2+V20+V15+V14+V6+V7+V16	0.504144712244058	0.173933940171434	0.468455725051269	0.00267950474118185	0.0242320368536117	0.488756924349842	0.170767318127656	0.492938871798923	0.702096055963088	0.5013008941555	0.169283043555855	0.502319687017286
66	rfRFE	6	repeatedcv	12	V2+V19+V4+V3+V6+V18+V17+V20+V7+V16+V15+V14	0.985645931817393	0.0885116846220041	0.889197541134464	0.00473905436862424	0.0124036860670533	0.905633358747426	0.0829974440235973	0.906405274013296	0.952053188647197	0.96410604002628	0.0519111961908307	0.964179367830108
67	rf	6	repeatedcv	12	V2+V3+V4+V6+V7+V14+V15+V16+V17+V18+V19+V20	0.995296282504001	0.0428869980124115	0.967886482216285	0.00507330266429503	0.00814932154917635	0.971381775599186	0.0409534135373614	0.971615871504305	0.985705773293585	0.989263743594216	0.0251471258308175	0.989285676702297
68	nnet	6	LOOCV	12	V2+V3+V4+V6+V7+V14+V15+V16+V17+V18+V19+V20	0.544422733007745	0.158772631842862	0.546562073952329	NA	NA	0.53724542036371	0.160186131636218	0.541030733898567	0.735547914073969	0.543451942499364	0.159209090831536	0.544384624945739
69	nnet	6	repeatedcv	12	V2+V3+V4+V6+V7+V14+V15+V16+V17+V18+V19+V20	0.55644058352859	0.1601141483843	0.540110243531358	0.0068085026073917	0.0394703735006351	0.543929444550121	0.15909212941652	0.547660083040509	0.740040595535481	0.554149765261098	0.157359445443791	0.555060593115519
70	svmRadial	6	LOOCV	12	V2+V3+V4+V6+V7+V14+V15+V16+V17+V18+V19+V20	0.72198702964312	0.140083458261227	0.646700081659541	NA	NA	0.638857059997394	0.141449319243548	0.641811194475943	0.801131196793598	0.701171458091155	0.128872495782555	0.701781935194136
71	svmRadial	6	repeatedcv	12	V2+V3+V4+V6+V7+V14+V15+V16+V17+V18+V19+V20	0.72198702964312	0.141788319907965	0.638755680194758	0.00608537823547574	0.0280210544253984	0.638857059997394	0.141449319243548	0.641811194475943	0.801131196793598	0.701171458091155	0.128872495782555	0.701781935194136
72	glmnet	6	LOOCV	12	V2+V3+V4+V6+V7+V14+V15+V16+V17+V18+V19+V20	0.15132481355798	0.217445005650941	0.148689236033532	0	0	0.13863143649173	0.218289801055431	0.145677396111429	0.381677083555497	0.149886825005787	0.217208226624546	0.151623521992496
73	glmnet	6	repeatedcv	12	V2+V3+V4+V6+V7+V14+V15+V16+V17+V18+V19+V20	0.151599373579348	0.217383506626304	0.150846733670539	0.00540855459458339	0.0298611441066993	0.13858145799893	0.218296869842588	0.145627826440657	0.381612141369554	0.150076447562883	0.217168452550804	0.151812757169496
74	lasso.RMSE	6	repeatedcv	12	V2+V3+V4+V6+V7+V14+V15+V16+V17+V18+V19+V20	0.151468688806496	0.217427087952796	0.150603943202385	0.00544377346222291	0.0297691016072379	0.138120898855167	0.218354130664451	0.145171034651853	0.381013168606878	0.149860823182088	0.217200240522181	0.151597573287947
75	pls	6	LOOCV	12	V2+V3+V4+V6+V7+V14+V15+V16+V17+V18+V19+V20	0.114241022106345	0.221830233342704	0.113981677647399	NA	NA	0.110949624093675	0.221760807999364	0.118222019806611	0.343834291202333	0.115275796517108	0.221560530194459	0.117083200405735
76	pls	6	repeatedcv	12	V2+V3+V4+V6+V7+V14+V15+V16+V17+V18+V19+V20	0.114241022106345	0.221779500359546	0.116072863518562	0.00510944830026382	0.0263266530642329	0.110949624093675	0.221760807999364	0.118222019806611	0.343834291202333	0.115275796517108	0.221560530194459	0.117083200405735
77	glmStepAIC	6	LOOCV	12	V2+V3+V4+V6+V7+V14+V15+V16+V17+V18+V19+V20	0.151856152417353	0.21754194686659	0.148031939388131	0	0	0.138827539029458	0.218296123012063	0.145871894538419	0.381931793044805	0.150328937319044	0.217129666092987	0.152064731114102
78	glmStepAIC	6	repeatedcv	12	V2+V3+V4+V6+V7+V14+V15+V16+V17+V18+V19+V20	0.151856152417353	0.217407626192921	0.151119088219172	0.00558492440010607	0.0301511960958407	0.138827539029458	0.218296123012063	0.145871894538419	0.381931793044805	0.150328937319044	0.217129666092987	0.152064731114102
79	lm	6	LOOCV	12	V2+V3+V4+V6+V7+V14+V15+V16+V17+V18+V19+V20	0.151862627947649	0.217598687490925	0.14760241225759	0	0	0.139044595681899	0.218267199649044	0.146087175676321	0.38221352105377	0.150389910887228	0.217121780918019	0.152125580119327
80	lm	6	repeatedcv	12	V2+V3+V4+V6+V7+V14+V15+V16+V17+V18+V19+V20	0.151862627947649	0.217468027214551	0.150676134872675	0.00559666141725682	0.030151640790841	0.139044595681899	0.218267199649044	0.146087175676321	0.38221352105377	0.150389910887228	0.217121780918019	0.152125580119327
81	svmRFE	5	repeatedcv	12	V3+V19+V4+V17+V18+V20+V2+V14+V15+V6+V7+V16	0.506014679987637	0.173194639242297	0.465283680611216	0.00326982021854769	0.0361408228605103	0.506656132116509	0.171972907634057	0.510691664778133	0.714626940982589	0.506900598439998	0.168618784029511	0.507907951660754
82	rfRFE	5	repeatedcv	12	V2+V19+V4+V6+V3+V18+V15+V17+V20+V7+V16+V14	0.985492357583332	0.0866842646167859	0.892710283772563	0.00433321864411817	0.0122314486224346	0.896012224734946	0.0864758485290643	0.896862840483536	0.947028426439004	0.961163936731178	0.0532794203500579	0.961243274960532
83	rf	5	repeatedcv	12	V2+V3+V4+V6+V7+V14+V15+V16+V17+V18+V19+V20	0.995683450392919	0.0414393181811609	0.96949331923331	0.00522207978289558	0.00816299073689915	0.977230963934339	0.0370011410029765	0.977417213718107	0.988644128955463	0.990889504763113	0.0231188748582437	0.990908116602208
84	nnet	5	LOOCV	12	V2+V3+V4+V6+V7+V14+V15+V16+V17+V18+V19+V20	0.539489035289161	0.15936233918144	0.537439865275158	NA	NA	0.532134952927901	0.163757519163934	0.535962069877366	0.732094303950909	0.53852138426783	0.160020422434986	0.539464139356149
85	nnet	5	repeatedcv	12	V2+V3+V4+V6+V7+V14+V15+V16+V17+V18+V19+V20	0.56200040132084	0.160168202815569	0.53385038873639	0.00649124866211693	0.0393978481171666	0.55999530061117	0.158920185529044	0.563594521056068	0.750729326093012	0.562353438597381	0.155900064901808	0.563247507160002
86	svmRadial	5	LOOCV	12	V2+V3+V4+V6+V7+V14+V15+V16+V17+V18+V19+V20	0.717639247281419	0.141901863671729	0.633170803829171	NA	NA	0.645504851666158	0.142526943298347	0.64840460748075	0.805235746524426	0.699291378130042	0.129317479306433	0.699905696050103
87	svmRadial	5	repeatedcv	12	V2+V3+V4+V6+V7+V14+V15+V16+V17+V18+V19+V20	0.717639247281419	0.142738125043899	0.629135659927301	0.00680449010175465	0.0341238137240421	0.645504851666158	0.142526943298347	0.64840460748075	0.805235746524426	0.699291378130042	0.129317479306433	0.699905696050103
88	glmnet	5	LOOCV	12	V2+V3+V4+V6+V7+V14+V15+V16+V17+V18+V19+V20	0.145294940247458	0.216948111000695	0.142344234797492	NA	NA	0.161428443576537	0.219527668389202	0.168287924610676	0.410229112339283	0.150952035683024	0.217118752453844	0.152686556549862
89	glmnet	5	repeatedcv	12	V2+V3+V4+V6+V7+V14+V15+V16+V17+V18+V19+V20	0.143443323232792	0.217001719925376	0.144177859494993	0.00544061458894559	0.0316865780875994	0.160703711707222	0.219845688715248	0.16756912101841	0.409352074647742	0.149330844851167	0.217425878730462	0.151068677650246
90	lasso.RMSE	5	repeatedcv	12	V2+V3+V4+V6+V7+V14+V15+V16+V17+V18+V19+V20	0.145450208766576	0.217022154159267	0.143944918133295	0.00539130191693656	0.0316487457900552	0.161435111729671	0.219494084427812	0.16829453821859	0.410237173131092	0.151075827801807	0.21708868100455	0.152810095773611
91	pls	5	LOOCV	12	V2+V3+V4+V6+V7+V14+V15+V16+V17+V18+V19+V20	0.109584137230439	0.221086126805889	0.10932846233046	NA	NA	0.126519069369593	0.224001878520322	0.133664107656958	0.365601022505351	0.115369873321297	0.221568034760655	0.117177085020334
92	pls	5	repeatedcv	12	V2+V3+V4+V6+V7+V14+V15+V16+V17+V18+V19+V20	0.109584137230439	0.221021945197164	0.111860726044213	0.00523131258926331	0.0296363333355588	0.126519069369593	0.224001878520322	0.133664107656958	0.365601022505351	0.115369873321297	0.221568034760655	0.117177085020334
93	glmStepAIC	5	LOOCV	12	V2+V3+V4+V6+V7+V14+V15+V16+V17+V18+V19+V20	0.145504810547601	0.217032813957979	0.141791527590095	0	0	0.160780620230038	0.219444418171792	0.167645400432655	0.409445234961472	0.150987683312736	0.217054692201797	0.152722131354998
94	glmStepAIC	5	repeatedcv	12	V2+V3+V4+V6+V7+V14+V15+V16+V17+V18+V19+V20	0.145504810547601	0.217118519132225	0.143697591748161	0.00558317238441024	0.0319644942795604	0.160780620230038	0.219444418171792	0.167645400432655	0.409445234961472	0.150987683312736	0.217054692201797	0.152722131354998
95	lm	5	LOOCV	12	V2+V3+V4+V6+V7+V14+V15+V16+V17+V18+V19+V20	0.145820114900639	0.217040786072017	0.14173944485957	0	0	0.160411455925539	0.219484240000502	0.167279255877068	0.408997867814819	0.151138236211894	0.217034934051001	0.1528723766895
96	lm	5	repeatedcv	12	V2+V3+V4+V6+V7+V14+V15+V16+V17+V18+V19+V20	0.145820114900639	0.217063286879976	0.144147763892772	0.00558970375710767	0.0320246348276092	0.160411455925539	0.219484240000502	0.167279255877068	0.408997867814819	0.151138236211894	0.217034934051001	0.1528723766895
97	svmRFE	4	repeatedcv	12	V3+V19+V4+V20+V18+V17+V15+V14+V2+V6+V16+V7	0.500349687576518	0.173058173793306	0.473832887246502	0.00296287527467286	0.0208623751810738	0.495301381480132	0.170010472407695	0.499429795537555	0.706703470726977	0.500090959134	0.169187697086726	0.501112223773155
98	rfRFE	4	repeatedcv	12	V2+V19+V4+V6+V3+V18+V17+V20+V15+V7+V16+V14	0.986466970862538	0.0845076007319169	0.89983679068203	0.00288683917783999	0.00839311978099641	0.89415607206085	0.0859430865550862	0.895021871062398	0.946055955566264	0.961935796323727	0.0524837481343557	0.96201355772041
99	rf	4	repeatedcv	12	V2+V3+V4+V6+V7+V14+V15+V16+V17+V18+V19+V20	0.996017795880738	0.0399366646488797	0.971974866946709	0.00487726514268776	0.0074287896536776	0.977591566516607	0.0361428407257741	0.977774866586001	0.988824992901171	0.991361702443445	0.0224639632174471	0.991379349629464
100	nnet	4	LOOCV	12	V2+V3+V4+V6+V7+V14+V15+V16+V17+V18+V19+V20	0.530362515107573	0.159167943386913	0.543165006938806	NA	NA	0.514382246018634	0.164760415979076	0.518354579384535	0.719968457214991	0.527031025460188	0.162022964307	0.527997254213078
101	nnet	4	repeatedcv	12	V2+V3+V4+V6+V7+V14+V15+V16+V17+V18+V19+V20	0.572077170622881	0.159802179756313	0.540790049294652	0.00692099234702548	0.037777603470551	0.552646601297946	0.158163589640708	0.556305933802667	0.745859191672709	0.567890763555429	0.15493888191036	0.568773519911802
102	svmRadial	4	LOOCV	12	V2+V3+V4+V6+V7+V14+V15+V16+V17+V18+V19+V20	0.711329159010215	0.142892025990179	0.631699508825143	NA	NA	0.658685586999574	0.137907933226083	0.661477524938227	0.813312685833823	0.698381998097427	0.129481208210314	0.698998173790793
103	svmRadial	4	repeatedcv	12	V2+V3+V4+V6+V7+V14+V15+V16+V17+V18+V19+V20	0.711329159010215	0.14336765303929	0.629685146668031	0.00619651795632484	0.0314500297459729	0.658685586999574	0.137907933226083	0.661477524938227	0.813312685833823	0.698381998097427	0.129481208210314	0.698998173790793
104	glmnet	4	LOOCV	12	V2+V3+V4+V6+V7+V14+V15+V16+V17+V18+V19+V20	0.148301769766703	0.217987134464275	0.142478975670777	0	0	0.150720876746188	0.217559528517693	0.157667945239062	0.397074231396425	0.150623680476633	0.217122067537541	0.152358872140623
105	glmnet	4	repeatedcv	12	V2+V3+V4+V6+V7+V14+V15+V16+V17+V18+V19+V20	0.148130053418383	0.217910581244636	0.146290872234752	0.00462348867570687	0.0277999763098061	0.150676076027009	0.217580827139509	0.157623510987933	0.397018275382801	0.150482411880949	0.217151521034354	0.152217892142684
106	lasso.RMSE	4	repeatedcv	12	V2+V3+V4+V6+V7+V14+V15+V16+V17+V18+V19+V20	0.148342638062876	0.217811658369924	0.146808172144112	0.00465083164940818	0.0279555823361734	0.150875342175858	0.217536220223316	0.157821147147834	0.397267097993068	0.150692657608042	0.217109583786323	0.152427708358588
107	pls	4	LOOCV	12	V2+V3+V4+V6+V7+V14+V15+V16+V17+V18+V19+V20	0.114985088473613	0.221481898653396	0.114767657944299	NA	NA	0.112091890178051	0.222416408932365	0.119354942201135	0.345477846179946	0.116032554944005	0.221468060484051	0.117838412850146
108	pls	4	repeatedcv	12	V2+V3+V4+V6+V7+V14+V15+V16+V17+V18+V19+V20	0.114985088473613	0.221388560833105	0.117056517763825	0.0042513308005513	0.0236046934909314	0.112091890178051	0.222416408932365	0.119354942201135	0.345477846179946	0.116032554944005	0.221468060484051	0.117838412850146
109	glmStepAIC	4	LOOCV	12	V2+V3+V4+V6+V7+V14+V15+V16+V17+V18+V19+V20	0.148511244848235	0.218013417629397	0.142604175226688	0	0	0.15024210653328	0.217574655930189	0.157193091346913	0.396475839550045	0.150667628953918	0.217085255517347	0.152402730835524
110	glmStepAIC	4	repeatedcv	12	V2+V3+V4+V6+V7+V14+V15+V16+V17+V18+V19+V20	0.148511244848235	0.217931175255559	0.147072452984509	0.00497716261037914	0.0289928537431617	0.15024210653328	0.217574655930189	0.157193091346913	0.396475839550045	0.150667628953918	0.217085255517347	0.152402730835524
111	lm	4	LOOCV	12	V2+V3+V4+V6+V7+V14+V15+V16+V17+V18+V19+V20	0.148725441034327	0.218032293894879	0.142469148265017	0	0	0.150302363247815	0.217566102642862	0.157252855163988	0.396551201188432	0.150844034044507	0.21706266132251	0.152578775547991
112	lm	4	repeatedcv	12	V2+V3+V4+V6+V7+V14+V15+V16+V17+V18+V19+V20	0.148725441034327	0.217934510663855	0.147143566753336	0.00500198814282815	0.0291263192854645	0.150302363247815	0.217566102642862	0.157252855163988	0.396551201188432	0.150844034044507	0.21706266132251	0.152578775547991
113	svmRFE	3	repeatedcv	12	V3+V19+V4+V17+V20+V18+V2+V6+V15+V14+V16+V7	0.501721932088486	0.174032754947452	0.472358596033021	0.00445014633066492	0.0375610397296999	0.445050142615713	0.173976958139	0.44958960975178	0.670514436646804	0.48876008003051	0.1708306173612	0.489804492533001
114	rfRFE	3	repeatedcv	12	V2+V19+V4+V3+V6+V18+V15+V20+V17+V16+V7+V14	0.986592769914396	0.0860063162043561	0.896777703889663	0.00404872072352353	0.0119848803892516	0.899072353518291	0.0831423559380252	0.899897937538592	0.948629504885122	0.9640322360585	0.0515154067386043	0.964105714636522
115	rf	3	repeatedcv	12	V2+V3+V4+V6+V7+V14+V15+V16+V17+V18+V19+V20	0.995892464870156	0.0404327696058989	0.971658378920141	0.00491321983198412	0.00731431550834085	0.965388596137572	0.04395264351057	0.965671716005568	0.982685970188629	0.988455800070354	0.025881674254425	0.988479383727003
116	nnet	3	LOOCV	12	V2+V3+V4+V6+V7+V14+V15+V16+V17+V18+V19+V20	0.607435063930939	0.160436591968125	0.541341895419318	NA	NA	0.538197057857784	0.159733266548747	0.541974587036861	0.73618923317097	0.589295614428542	0.151151067832491	0.590134642795389
117	nnet	3	repeatedcv	12	V2+V3+V4+V6+V7+V14+V15+V16+V17+V18+V19+V20	0.560541355632714	0.160318685305659	0.543103601073967	0.00656361820438515	0.0357930740942138	0.529870406320378	0.159064703608772	0.533716047168473	0.730558722601046	0.553890507259804	0.157355571071495	0.554801864752633
118	svmRadial	3	LOOCV	12	V2+V3+V4+V6+V7+V14+V15+V16+V17+V18+V19+V20	0.717414883251224	0.141112060461532	0.645015275811756	NA	NA	0.644239598886258	0.138233681620472	0.647149704416841	0.804456154440278	0.700050439539492	0.129093994346997	0.700663206772302
119	svmRadial	3	repeatedcv	12	V2+V3+V4+V6+V7+V14+V15+V16+V17+V18+V19+V20	0.717414883251224	0.142235266582815	0.640005158381623	0.00649314087809543	0.0296270292007688	0.644239598886258	0.138233681620472	0.647149704416841	0.804456154440278	0.700050439539492	0.129093994346997	0.700663206772302
120	glmnet	3	LOOCV	12	V2+V3+V4+V6+V7+V14+V15+V16+V17+V18+V19+V20	0.156788007747402	0.218279171607097	0.150403029020348	NA	NA	0.127270006834898	0.21684686612622	0.134408902484511	0.366618197154084	0.15065034671781	0.21709157093273	0.152385483905312
121	glmnet	3	repeatedcv	12	V2+V3+V4+V6+V7+V14+V15+V16+V17+V18+V19+V20	0.156220987919306	0.218302540627941	0.153135840147096	0.00505593553483161	0.0304290438955913	0.129023045896963	0.216434351177782	0.136147601758747	0.368981844754924	0.150865563906934	0.217060551377269	0.152600261427043
122	lasso.RMSE	3	repeatedcv	12	V2+V3+V4+V6+V7+V14+V15+V16+V17+V18+V19+V20	0.156708779449563	0.218125759819434	0.154079200188948	0.00497576661665348	0.030063060015857	0.127612246300308	0.216760625138183	0.13474834244509	0.367080839114616	0.150716785571255	0.217080512792399	0.152451787030762
123	pls	3	LOOCV	12	V2+V3+V4+V6+V7+V14+V15+V16+V17+V18+V19+V20	0.120902979221182	0.222063417550305	0.120689937483919	NA	NA	0.0894627433831277	0.221282121265872	0.0969109009014661	0.311305157203452	0.114874941967405	0.221619958891309	0.11668316476216
124	pls	3	repeatedcv	12	V2+V3+V4+V6+V7+V14+V15+V16+V17+V18+V19+V20	0.120902979221182	0.222008510928917	0.122443849463044	0.00425132592039289	0.0234777039600472	0.0894627433831277	0.221282121265872	0.0969109009014661	0.311305157203452	0.114874941967405	0.221619958891309	0.11668316476216
125	glmStepAIC	3	LOOCV	12	V2+V3+V4+V6+V7+V14+V15+V16+V17+V18+V19+V20	0.156924336802833	0.218150182808468	0.15157370799014	0	0	0.123879281645744	0.217707394462818	0.131045913288724	0.362002642654337	0.149550998099608	0.217283473623076	0.151288381147413
126	glmStepAIC	3	repeatedcv	12	V2+V3+V4+V6+V7+V14+V15+V16+V17+V18+V19+V20	0.156924336802833	0.218161557915761	0.154474743121198	0.00530526924723191	0.0313029604344663	0.123879281645744	0.217707394462818	0.131045913288724	0.362002642654337	0.149550998099608	0.217283473623076	0.151288381147413
127	lm	3	LOOCV	12	V2+V3+V4+V6+V7+V14+V15+V16+V17+V18+V19+V20	0.15707268222807	0.21821342240444	0.151109372089221	0	0	0.123934114299111	0.217719554389089	0.131100297413228	0.362077750508407	0.14965103468776	0.217272196748541	0.151388213370726
128	lm	3	repeatedcv	12	V2+V3+V4+V6+V7+V14+V15+V16+V17+V18+V19+V20	0.15707268222807	0.21818452772552	0.154339538602468	0.00531753583284504	0.0313285712675207	0.123934114299111	0.217719554389089	0.131100297413228	0.362077750508407	0.14965103468776	0.217272196748541	0.151388213370726
129	svmRFE	2	repeatedcv	12	V3+V19+V4+V17+V20+V18+V2+V15+V14+V6+V7+V16	0.508929845192408	0.172525689928723	0.47159956470718	0.00315159911895858	0.0142511057202207	0.502278584146487	0.171299101439397	0.506349924971465	0.711582690185382	0.508302058415924	0.168075176338687	0.509306548592807
130	rfRFE	2	repeatedcv	12	V2+V19+V4+V3+V6+V18+V20+V17+V7+V15+V16+V14	0.986360860264027	0.0871248359284914	0.893749199834774	0.00431050446194028	0.0100120139641385	0.903158462585992	0.0834433978419605	0.90395062240124	0.950763178925877	0.963966509256181	0.0517604631475837	0.964040122107547
131	rf	2	repeatedcv	12	V2+V3+V4+V6+V7+V14+V15+V16+V17+V18+V19+V20	0.995616724007692	0.0425814014550079	0.968381881942687	0.00442907234898399	0.00688524505902746	0.971087748349449	0.041383682156141	0.971324249385445	0.985557836651632	0.98931663542243	0.0250500753837569	0.989338460477746
132	nnet	2	LOOCV	12	V2+V3+V4+V6+V7+V14+V15+V16+V17+V18+V19+V20	0.550159832890178	0.159659541842585	0.537410841442977	NA	NA	0.533945175885476	0.162850183100084	0.537757485285186	0.733319497412407	0.546876618155745	0.158574207401598	0.547802304329073
133	nnet	2	repeatedcv	12	V2+V3+V4+V6+V7+V14+V15+V16+V17+V18+V19+V20	0.552810278226172	0.160498386401333	0.533531769650949	0.00633749906769417	0.035507905877399	0.537599088396343	0.162420360089658	0.541381508941158	0.73578632016446	0.549798156327594	0.158145912677606	0.550717874087906
134	svmRadial	2	LOOCV	12	V2+V3+V4+V6+V7+V14+V15+V16+V17+V18+V19+V20	0.71312522498489	0.142101650895972	0.633159119557853	NA	NA	0.626015369577898	0.145956948871179	0.629074548558856	0.793142199456602	0.690915300589512	0.131102438340413	0.691546730006081
135	svmRadial	2	repeatedcv	12	V2+V3+V4+V6+V7+V14+V15+V16+V17+V18+V19+V20	0.71312522498489	0.143628225517983	0.625870410086437	0.00614712015979178	0.0292513242416415	0.626015369577898	0.145956948871179	0.629074548558856	0.793142199456602	0.690915300589512	0.131102438340413	0.691546730006081
136	glmnet	2	LOOCV	12	V2+V3+V4+V6+V7+V14+V15+V16+V17+V18+V19+V20	0.140709599326081	0.217821781117546	0.13783309092738	NA	NA	0.17414463413119	0.217287472305585	0.180900097246681	0.425323520683587	0.150449302140151	0.217198310195284	0.152184850041806
137	glmnet	2	repeatedcv	12	V2+V3+V4+V6+V7+V14+V15+V16+V17+V18+V19+V20	0.140609436925408	0.217844569641379	0.139416787885095	0.00463465592347136	0.0258527216112321	0.173615568487586	0.217378301749318	0.180375359338403	0.424706203555355	0.150257138931907	0.217234965212945	0.151993079403957
138	lasso.RMSE	2	repeatedcv	12	V2+V3+V4+V6+V7+V14+V15+V16+V17+V18+V19+V20	0.140537006493332	0.217875001960372	0.139285291408132	0.00464304161950463	0.0259516149946955	0.173270715209297	0.217431339246041	0.180033326945826	0.42430334307642	0.150127121180769	0.217257557486148	0.151863327266202
139	pls	2	LOOCV	12	V2+V3+V4+V6+V7+V14+V15+V16+V17+V18+V19+V20	0.108427583673592	0.221535422253716	0.108151053810479	NA	NA	0.128384834568607	0.222870392421793	0.135514610972954	0.368123092148474	0.115049096593032	0.221616587303981	0.116856963607142
140	pls	2	repeatedcv	12	V2+V3+V4+V6+V7+V14+V15+V16+V17+V18+V19+V20	0.108427583673592	0.221439174946906	0.110410562051279	0.00459888424549376	0.0229540676012552	0.128384834568607	0.222870392421793	0.135514610972954	0.368123092148474	0.115049096593032	0.221616587303981	0.116856963607142
141	glmStepAIC	2	LOOCV	12	V2+V3+V4+V6+V7+V14+V15+V16+V17+V18+V19+V20	0.140891769217507	0.217918952091235	0.13715565982937	0	0	0.175936756623456	0.216949295534997	0.182677560250258	0.427407955295942	0.150968442011959	0.217087011474605	0.152702929362292
142	glmStepAIC	2	repeatedcv	12	V2+V3+V4+V6+V7+V14+V15+V16+V17+V18+V19+V20	0.140891769217507	0.217870294872023	0.139851366755625	0.0047963968659046	0.0263180555465481	0.175936756623456	0.216949295534997	0.182677560250258	0.427407955295942	0.150968442011959	0.217087011474605	0.152702929362292
143	lm	2	LOOCV	12	V2+V3+V4+V6+V7+V14+V15+V16+V17+V18+V19+V20	0.140898292023844	0.217977733700729	0.136706541305143	0	0	0.176189498534944	0.216920200724328	0.182928234743247	0.427701104444736	0.151032084940867	0.217079127985758	0.152766442275002
144	lm	2	repeatedcv	12	V2+V3+V4+V6+V7+V14+V15+V16+V17+V18+V19+V20	0.140898292023844	0.217945725492891	0.139320822666624	0.00481792856211634	0.0264098624102333	0.176189498534944	0.216920200724328	0.182928234743247	0.427701104444736	0.151032084940867	0.217079127985758	0.152766442275002
145	svmRFE	1	repeatedcv	12	V3+V19+V4+V20+V17+V18+V2+V14+V15+V6+V7+V16	0.506034626315097	0.172789508983816	0.472968812087304	0.00445715982576724	0.0392405185299709	0.454161363340173	0.17537286947461	0.458626301063361	0.677219536829352	0.494037630774461	0.169598878483859	0.495071261763686
146	rfRFE	1	repeatedcv	12	V2+V19+V4+V6+V3+V18+V20+V17+V7+V16+V15+V14	0.986434085726741	0.0861561058238582	0.895217799853283	0.00296674883873879	0.00728834116717169	0.891053220645033	0.0878359725162078	0.891944400844256	0.94442808135096	0.960925848907285	0.0534631794204772	0.961005673526473
147	rf	1	repeatedcv	12	V2+V3+V4+V6+V7+V14+V15+V16+V17+V18+V19+V20	0.995759698269357	0.0412039091904192	0.970545928456058	0.00462283560637159	0.00685066609786834	0.969658938135458	0.0422612822741415	0.969907126780566	0.984838629817376	0.989145363573604	0.0252806776698086	0.989167538520338
148	nnet	1	LOOCV	12	V2+V3+V4+V6+V7+V14+V15+V16+V17+V18+V19+V20	0.603608408521313	0.156990127743908	0.556238011083464	NA	NA	0.551850184275075	0.157927129062783	0.555516031438469	0.745329478444579	0.591288118141754	0.15070427548713	0.592123076020933
149	nnet	1	repeatedcv	12	V2+V3+V4+V6+V7+V14+V15+V16+V17+V18+V19+V20	0.573654267290906	0.158276720522802	0.549740427735745	0.0072664792869818	0.041519433303912	0.551513488541969	0.157658623715471	0.555182089862689	0.745105421979125	0.568949647934363	0.154654410361185	0.569830241094865
150	svmRadial	1	LOOCV	12	V2+V3+V4+V6+V7+V14+V15+V16+V17+V18+V19+V20	0.725303757449722	0.13986756844735	0.647727301458268	NA	NA	0.621588659707328	0.144874684429796	0.624684048993976	0.790369564820139	0.6996318579063	0.129233184345161	0.700245480259913
151	svmRadial	1	repeatedcv	12	V2+V3+V4+V6+V7+V14+V15+V16+V17+V18+V19+V20	0.725303757449722	0.140970533128892	0.642687211509933	0.00532945273712671	0.0249051188006418	0.621588659707328	0.144874684429796	0.624684048993976	0.790369564820139	0.6996318579063	0.129233184345161	0.700245480259913
152	glmnet	1	LOOCV	12	V2+V3+V4+V6+V7+V14+V15+V16+V17+V18+V19+V20	0.15168825324783	0.217384262725247	0.148883037962667	NA	NA	0.142068119932749	0.217992872661172	0.149085967622461	0.386116520784155	0.151025683248409	0.217056789672317	0.152760053660568
153	glmnet	1	repeatedcv	12	V2+V3+V4+V6+V7+V14+V15+V16+V17+V18+V19+V20	0.151829761677672	0.217587581494584	0.14955526025165	0.00448216361750967	0.0270308521411325	0.142218931438482	0.217968008280592	0.149235545496245	0.386310167477178	0.151169353199211	0.217030425185233	0.152903430107895
154	lasso.RMSE	1	repeatedcv	12	V2+V3+V4+V6+V7+V14+V15+V16+V17+V18+V19+V20	0.151640391344709	0.217578846585263	0.149657122125986	0.00455256081812362	0.027121817108512	0.142040313323968	0.217997775565412	0.149058388470602	0.386080805623127	0.150982995065602	0.217063885812709	0.152717452685488
155	pls	1	LOOCV	12	V2+V3+V4+V6+V7+V14+V15+V16+V17+V18+V19+V20	0.116470589461	0.221510314631912	0.116215043918861	NA	NA	0.107506973980083	0.222335177082817	0.114807530430144	0.338832599420634	0.116039348013268	0.221465302011383	0.117845192041842
156	pls	1	repeatedcv	12	V2+V3+V4+V6+V7+V14+V15+V16+V17+V18+V19+V20	0.116470589461	0.221427151059581	0.118327012173778	0.00405593475463908	0.0234169273548129	0.107506973980083	0.222335177082817	0.114807530430144	0.338832599420634	0.116039348013268	0.221465302011383	0.117845192041842
157	glmStepAIC	1	LOOCV	12	V2+V3+V4+V6+V7+V14+V15+V16+V17+V18+V19+V20	0.151948139860995	0.217666233372562	0.146836092041353	0	0	0.142048163942009	0.217987162884482	0.149066174870909	0.386090889391228	0.151215516483659	0.217013894084084	0.152949499085327
158	glmStepAIC	1	repeatedcv	12	V2+V3+V4+V6+V7+V14+V15+V16+V17+V18+V19+V20	0.151948139860995	0.217615349473251	0.150201845765696	0.00493086628316833	0.0280111229425486	0.142048163942009	0.217987162884482	0.149066174870909	0.386090889391228	0.151215516483659	0.217013894084084	0.152949499085327
159	lm	1	LOOCV	12	V2+V3+V4+V6+V7+V14+V15+V16+V17+V18+V19+V20	0.152029550999996	0.217725132158494	0.146400410937318	0	0	0.142455891608121	0.217935181100162	0.149470567341388	0.386614235823499	0.151378415537681	0.216993057321688	0.153112065352722
160	lm	1	repeatedcv	12	V2+V3+V4+V6+V7+V14+V15+V16+V17+V18+V19+V20	0.152029550999996	0.217669021182293	0.149856218734497	0.00496807199289134	0.0280476514123627	0.142455891608121	0.217935181100162	0.149470567341388	0.386614235823499	0.151378415537681	0.216993057321688	0.153112065352722
