# Supplementary material for: A methodology for the design of experiments in computational intelligence with multiple regression models
Source: PeerJ. 2016 Dec 1;4:e2721. doi: 10.7717/peerj.2721 (PMC5136129; doi:10.7717/peerj.2721)
Supplement: Data S1 — Datailed results from UC Irvine Machine Learning Repository (Housing, Machine CPU, Wine Quality, Automobile and Parkinson) and the 3 Use Cases (Protein Corona, Gajewicz Metal Oxides and Aquatic Toxicity) [file peerj-04-2721-s001.zip › 5_parkinson/RRegrsResBest.csv]

Averaged values for all spits:
RegrMeth	CVtype	adjR2.tr.Avg	RMSE.tr.Avg	R2.tr.Avg	RMSEsd.tr.Avg	R2sd.tr.Avg	adjR2.ts.Avg	RMSE.ts.Avg	R2.ts.Avg	corP.ts.Avg	adjR2.both.Avg	RMSE.both.Avg	R2.both.Avg	NoModelFeats.Avg
1	rf	repeatedcv	0.995742021462438	0.0413234030053301	0.970221705289885	0.00468001281611815	0.00717444882687565	0.97186601626473	0.0402440085654634	0.97209615110101	0.985947185345148	0.989750431685146	0.024461887807885	0.989771370537679	12
RRegr package | eNanoMapper
Regression method: rf
Split no.: 10
CV type: repeatedcv
Training Set Summary:
net.c	V2	V3	V4	V6	V7	V14	V15	V16	V17	V18	V19	V20
	Min. :0.0000	Min. :0.0000	Min. :0.0000	Min. :0.0000	Min. :0.003068	Min. :0.00000	Min. :0.00000	Min. :0.00000	Min. :0.0004546	Min. :0.0000	Min. :0.06138	Min. :0.0000	Min. :0.0000
	1st Qu.:0.2890	1st Qu.:0.4490	1st Qu.:0.0000	1st Qu.:0.2261	1st Qu.:0.045225	1st Qu.:0.02167	1st Qu.:0.04823	1st Qu.:0.04782	1st Qu.:0.0142044	1st Qu.:0.4891	1st Qu.:0.39019	1st Qu.:0.2292	1st Qu.:0.1888
	Median :0.4633	Median :0.5918	Median :0.0000	Median :0.4359	Median :0.072518	Median :0.03339	Median :0.07415	Median :0.07488	Median :0.0243377	Median :0.5593	Median :0.48120	Median :0.3656	Median :0.2573
	Mean :0.4724	Mean :0.5874	Mean :0.3195	Mean :0.4409	Mean :0.094425	Mean :0.04636	Mean :0.09129	Mean :0.09630	Mean :0.0420445	Mean :0.5528	Mean :0.47904	Mean :0.3931	Mean :0.2779
	3rd Qu.:0.6543	3rd Qu.:0.7347	3rd Qu.:1.0000	3rd Qu.:0.6494	3rd Qu.:0.115600	3rd Qu.:0.05191	3rd Qu.:0.11058	3rd Qu.:0.11797	3rd Qu.:0.0417922	3rd Qu.:0.6291	3rd Qu.:0.56811	3rd Qu.:0.5594	3rd Qu.:0.3434
	Max. :1.0000	Max. :1.0000	Max. :1.0000	Max. :1.0000	Max. :1.000000	Max. :1.00000	Max. :1.00000	Max. :1.00000	Max. :1.0000000	Max. :0.9606	Max. :1.00000	Max. :1.0000	Max. :1.0000
Test Set Summary:
net.c	V2	V3	V4	V6	V7	V14	V15	V16	V17	V18	V19	V20
	Min. :0.002895	Min. :0.0000	Min. :0.0000	Min. :0.0000096	Min. :0.00000	Min. :0.0001748	Min. :0.005642	Min. :0.003725	Min. :0.00000	Min. :0.003866	Min. :0.0000	Min. :0.00714	Min. :0.001729
	1st Qu.:0.285795	1st Qu.:0.4490	1st Qu.:0.0000	1st Qu.:0.2438618	1st Qu.:0.04703	1st Qu.:0.0221989	1st Qu.:0.048458	1st Qu.:0.047006	1st Qu.:0.01438	1st Qu.:0.492324	1st Qu.:0.3945	1st Qu.:0.24755	1st Qu.:0.191469
	Median :0.448095	Median :0.5918	Median :0.0000	Median :0.4364091	Median :0.07387	Median :0.0336480	Median :0.073891	Median :0.075479	Median :0.02408	Median :0.560760	Median :0.4772	Median :0.37838	Median :0.261659
	Mean :0.469354	Mean :0.5893	Mean :0.3127	Mean :0.4452250	Mean :0.09370	Mean :0.0466934	Mean :0.092326	Mean :0.097115	Mean :0.04411	Mean :0.552863	Mean :0.4791	Mean :0.40455	Mean :0.279983
	3rd Qu.:0.655030	3rd Qu.:0.7347	3rd Qu.:1.0000	3rd Qu.:0.6493669	3rd Qu.:0.11436	3rd Qu.:0.0513022	3rd Qu.:0.111505	3rd Qu.:0.117161	3rd Qu.:0.04127	3rd Qu.:0.629252	3rd Qu.:0.5678	3rd Qu.:0.56849	3rd Qu.:0.338543
	Max. :1.000000	Max. :1.0000	Max. :1.0000	Max. :1.0000000	Max. :0.72116	Max. :0.9470372	Max. :0.673590	Max. :0.628958	Max. :0.96763	Max. :1.000000	Max. :0.9620	Max. :0.91657	Max. :0.924156
Predictors:
x
1	V2
2	V3
3	V4
4	V6
5	V7
6	V14
7	V15
8	V16
9	V17
10	V18
11	V19
12	V20
Trainig Results:
x
1	NA
Test Results:
x
1	NA
Full Statistics:
RegrMeth	Split.No	CVtype	NoModelFeats	ModelFeats	adjR2.tr	RMSE.tr	R2.tr	RMSEsd.tr	R2sd.tr	adjR2.ts	RMSE.ts	R2.ts	corP.ts	adjR2.both	RMSE.both	R2.both
1	rf	10	repeatedcv	12	V2+V3+V4+V6+V7+V14+V15+V16+V17+V18+V19+V20	0.996239200670856	0.0391937496376095	0.97312893147461	0.00401796231184095	0.00578378342161725	0.970419168729547	0.0410617294980859	0.970661138719489	0.985221365338516	0.989742767507513	0.0242964699278766	0.989763722017202
V2
	x
1	160.704048964637
V3
	x
1	19.3649313222722
V4
	x
1	18.5137860390786
V19
	x
1	16.9203877369911
V6
	x
1	7.03985365019425
V17
	x
1	4.13958149258758
V15
	x
1	4.06779756853785
V18
	x
1	3.13649035901909
V7
	x
1	2.69860017742021
V16
	x
1	2.42800634784399
V20
	x
1	2.42689312412041
V14
	x
1	1.95906615077106
Residuals of the fitted model:
resids
1	-0.0362661625838104
2	-0.0392027666332452
4	-0.0519898791571859
5	-0.0242568090094372
6	-0.144069873017331
7	-0.0115807479290364
8	-0.0113267048158947
9	-0.106617756412664
10	-0.0683834157420298
12	-0.147750428003229
13	-0.286359962673564
15	-0.121587351762701
16	-0.150780229826474
17	-0.217364259858584
18	-0.132170962723303
19	-0.267310216320727
20	-0.098047526487797
22	-0.351836996859791
23	-0.0240392373838655
25	0.00359695337136212
27	0.000892031194948739
28	-0.0478970329735767
29	0.00035773414700857
30	-0.00220172787891015
34	-0.0239047415565906
35	-0.0308224806462247
37	-0.334677123982811
38	-0.0143316626308654
39	-0.018220846223733
40	-0.0155653679513559
41	-0.263230734411873
42	-0.0910523248519948
43	-0.139809323582217
45	-0.00876312064318563
46	-0.0823370151349939
47	-0.0279756158559917
49	-0.0691727321051068
50	0.0106796375515643
51	-0.00324418058669984
52	-0.0737549892194483
53	-0.0159776341969226
54	-0.0392912490053728
56	-0.0616372721472287
57	-0.00800460287969551
59	-0.0041343442741717
60	-0.00496375187001452
61	-0.00450813931096439
62	-0.0241523859587885
63	-0.00729932532806044
64	-0.0131483499429939
66	-0.00777170202455724
67	-0.00379708709269366
68	-0.00862788809253334
69	-0.0853800356322304
70	-0.109130765767152
71	-0.0325953244038276
72	-0.0319330576416383
74	-0.125774103720442
75	0.00221477815421633
77	0.0002982408701655
78	-0.00315039793391436
80	-0.000407745730633069
81	-0.00339388676276131
83	-0.0303623151114304
84	-0.023081656130081
85	-0.279398066219467
86	0.00290060899466726
87	-0.00815386683823216
88	-0.00277106565886553
91	-0.0424250646019596
92	-0.0114628011806706
94	-0.0010607539277655
95	-0.00809064395184567
96	-0.0098194598752096
97	-0.0351094567904127
99	-0.0864243135142261
100	0.00402447438869602
101	0.00324824740225826
105	-0.00919574102104448
106	-0.0280516341040514
108	-0.00438756027148179
112	-0.00389420095295412
113	-0.00994444853688126
114	-0.00514537893954548
115	0.0012055758616607
116	-0.0014373811235241
118	-0.0123217988901512
119	-0.0216364679462199
120	-0.00626469285979714
121	-0.0403550358483207
122	-0.0612225300252739
123	-0.0167328163601987
125	0.00110498513987844
128	-0.00534803125068573
129	-0.0119853332711159
130	-0.00124264076627134
131	-0.00127806752646653
132	-0.0135550231199204
133	0.00561168435241977
134	-0.0281270010545716
136	0.00088842922011334
137	-0.0026491740827288
138	-0.0601547751031286
139	-0.00151957858683871
140	-0.00761883395687257
141	-0.00929393518051336
143	-0.120547217208802
145	-0.00235435890989333
146	-0.00146109990710308
148	-0.0184445440962785
150	0.000834865837931298
152	0.00222120936998038
153	0.0053487571340527
155	0.00226588031302033
158	0.00395864135991225
159	-2.57170112840654e-05
160	-0.00324546883405408
161	0.000318473657018925
163	-0.000882732121536639
165	0.00678103350439813
166	-0.00117005474231358
168	0.00287479812446245
169	-0.00374704323144653
171	-0.0202154926096225
172	-0.0244871452987401
174	-0.0314659465608551
175	0.00232941453755897
177	0.00185765747211097
178	0.0042945449784203
180	0.00238713911125382
182	-0.00118971457577216
183	-0.000597847774190974
184	-0.00309883773048808
186	0.000565129798466207
187	-0.00595896510460003
188	-0.00226925823924651
189	0.000757444804145246
190	-0.00194629676567359
191	-0.0037918090523314
192	2.51785854525899e-05
193	-0.00248712628865316
194	0.00049749360975504
197	-0.00797069916301452
199	0.00768215884435425
200	0.00288859642839834
201	0.00561358145682556
202	0.00457906595769431
203	0.00189336768110704
204	0.0013253419213507
205	-0.000333037605213193
207	-0.00259220388125719
209	-0.00820426222490273
210	-0.0022967254720222
212	0.000460066872334214
213	-0.00245169478315155
214	0.000226193623856785
216	-0.0107984071101039
217	0.00622274393569833
218	-0.00687933598710139
219	0.00246607392779641
221	-0.00450208764991467
222	-0.00253755044865156
223	-0.00697651177748154
224	0.00142073456087238
225	-0.00027238671913099
226	0.00171672776283144
228	0.00495164892615085
229	0.00204464228867812
230	0.00156465436390341
233	0.0068259755485458
235	-0.00210752788544205
237	0.000711254972684067
238	-0.00141513003857519
239	5.96593532696255e-05
240	0.000139244161750207
241	-0.00551398912955448
243	-0.00281347093720546
244	-0.00482553273730363
246	-0.000933228052355684
247	-0.0182830294371485
248	-0.00440926356547394
249	0.00119588591132569
251	0.00207617978755364
253	0.000563839534371502
254	0.000677880960230803
255	-0.00197156711664981
256	-0.00467983814388856
257	-0.000255380124969284
259	-0.001941377266865
260	-0.000898488896996702
261	0.000515133397005652
263	-0.000139305263458345
264	0.000493629319796074
266	-0.00406676458415811
267	-0.00424246558224411
268	-0.00150299454413061
269	-0.00985876492355425
270	-0.00199375438682819
271	-0.00084785078606775
272	-0.00762921674358269
273	0.00436372893231807
274	0.0131946914329728
275	0.0128729904137896
276	0.00793316583399545
277	0.00163840518120689
278	0.00158039019202727
280	-0.00149513191230322
281	0.00306840550489951
283	-0.00291868906248566
284	0.000289784019387007
286	-0.00149291574548754
287	0.00028024476241495
288	0.000873512799788645
289	-0.00140960349634472
290	0.00420672495065244
293	-0.0110137381494874
294	-0.00788722000879127
296	0.00113035176548371
298	-0.00119684462101033
299	0.00047157570738332
300	-0.000377121377257095
303	0.00604335522883559
305	-0.00344337772769643
308	-0.000724331527274691
309	-0.00734938732389112
311	-0.00599870548688219
312	0.00214416260863626
314	0.000189459608887943
315	-0.0014145104772888
316	-0.00862533389445597
318	-0.000113420765459171
319	0.00607153565821961
320	5.60271885891028e-05
321	0.000511427905344641
323	0.00102301482349254
324	0.000186832917853708
325	-0.00148990445002151
326	-0.00534013255840771
328	-0.00165280059567541
329	-0.128664442976302
331	0.00130020018423438
332	-0.000917013822267498
333	-0.00289743259413244
334	-0.00138332205087222
335	-0.00103715778258417
336	-1.03180082221543e-05
337	-0.00604413041084118
338	-0.0256723895580458
340	6.79047475952155e-05
341	-0.00166720827508915
342	0.000644863984849753
343	0.00762904082984839
345	-0.00168105980873512
346	-0.00160984250572582
347	0.000188136297144537
348	-0.000745097694975438
349	-0.00394907348187756
350	-0.00675247760601994
351	0.00590739123074735
352	-0.00379019333734765
353	-0.00168917476920949
354	0.00325768897882317
355	0.000317156337924951
356	-0.00217970788814548
357	-0.00781021570580387
359	-0.000182987087434694
360	3.4047289230732e-05
361	-0.0176677427021907
362	0.000325999644314012
364	-0.000613727932593178
366	0.00120335589807929
368	-0.000675090266545664
370	-0.00302937577392937
371	0.000389717908796827
372	7.03303736446781e-05
376	-0.00235295733811958
377	-0.00442742384799744
379	0.00179538628562481
382	7.73424650378773e-05
384	0.000298294070693261
385	0.000531622579235114
386	-0.000983594666328136
387	-0.000631266055863389
388	-0.00920048846006694
390	0.000942137545589472
391	0.0123379723106273
392	-0.000145157889450909
394	-0.0027961295024076
395	-0.00100433245442555
396	-0.000353332604025702
398	-0.00625779205521748
399	0.00479483198579145
401	-0.00130236074632328
402	-0.00316998681710434
403	0.002710874603574
404	-0.00214929864060565
405	-0.00334169549774965
407	-0.00837916229787194
408	-0.000116502918068973
409	0.00217881139065512
410	-0.0365570424616125
411	-0.0485079918532767
412	0.000159565940190731
413	5.01682254293589e-05
416	-0.0029868708710068
417	-0.00209957367117009
418	-0.0011676680441538
419	-0.000133911525806552
420	0.00386739250893253
421	0.000360573920333729
422	-0.0161367133830497
423	0.00477715116430255
424	-0.103003472924314
426	-0.000478612452227245
427	0.000525709444523126
428	-0.0191685054762104
429	-0.00241627876657435
430	-0.00307589682068787
431	-0.0322160975566942
432	-0.000793997330833629
433	-0.000504990878881006
434	-0.00342054557795701
435	-0.000659480579267457
436	1.81014830933357e-05
437	-0.00910280872700264
438	0.00181617770688136
439	0.0101797549338975
440	0.018288924724489
441	0.00985406932866817
442	0.0909825500484726
443	0.13565093298868
444	0.0277066190830555
445	0.0108316369866558
446	0.0357788494873919
447	0.115684554726646
448	0.109637048250595
451	0.0261414058231242
453	0.0245421267657403
454	0.0194718885749334
455	0.0842731472630843
456	0.032040811554466
457	0.0227059720173081
458	0.00121697827136485
459	0.0481959563759582
460	0.0525687573407659
462	0.013305949822037
463	0.0584209698541093
464	0.0848731996969879
465	0.0593219202380162
466	0.152507760504693
467	0.0607079258519667
470	0.0665829180131454
472	0.0127489135191252
474	0.1008197926448
476	0.000432671488807435
478	8.04984358612204e-05
479	-0.00466313864333529
481	0.021851397829893
482	0.038026101686453
484	0.089543258998552
485	0.0278103870266312
486	0.0141954536941237
487	0.00235275353757441
488	0.0256720009725532
489	0.0427621408366657
490	0.053443484005776
491	0.06484612338233
492	0.0282750817052523
493	0.157719020864008
495	0.099658944840796
496	0.00106282185367151
497	0.0920814187665009
498	0.00128830481980591
500	0.030114008571871
502	-0.00471847706514378
503	0.0158977320877806
504	-0.00332396136794655
505	-0.00543269368021077
507	0.00546519719707261
508	0.0884978902540879
509	0.0189644695722266
510	0.00522938698944425
511	0.0375022495739147
512	0.011668916526148
514	0.0133362435370074
515	0.317818455400708
516	0.147729003846657
518	0.00849346057506195
519	0.00485790011459364
520	0.0815885436007259
521	0.0306506590212243
522	0.0111251225918227
523	0.00772961168856307
524	0.00452464330264074
525	0.0211217427063702
526	0.0188256078170264
527	0.0629453748746614
528	-0.00915907935927829
529	0.100268184737039
530	0.0691086920940824
531	0.0227513087346342
532	0.0050556295991494
533	0.0104168485526107
534	0.0845364160970479
535	0.0295544822330722
536	0.0344421855785598
538	0.0651003864948098
539	0.0413560568715985
540	0.0130303923616248
542	0.0402657136532457
544	0.0338494713393867
545	0.0034309993328917
546	0.0429504167671554
547	0.00639356064175328
551	0.0191574832309834
553	0.00899175294576998
554	0.0118984762373082
555	0.0279986638363067
556	0.0078153843542918
557	0.126152832903884
558	0.0486923761198539
559	0.0364325102588376
561	0.137399791292796
562	0.0345357314844795
563	0.0123135539623866
564	0.0100606956894365
565	0.0155978091808123
567	0.00585347224455302
569	0.135845297182581
570	0.0259180896377981
571	0.0534936992968944
572	0.0329419887403539
573	0.0216291613335503
574	0.0333347331668489
575	0.00526037533495172
576	-0.0173421167693943
577	-0.0142185263322511
580	5.86456917740508e-05
583	-0.0149079492562983
584	-0.00616334432613552
586	-0.00238260793844258
587	-0.0332512645980605
590	-0.0158363860941296
593	-0.03795921918782
594	-0.0111101935692636
595	-0.00336984505362858
596	-0.00428485397564071
597	-0.00407368582989964
598	-0.0658503437592073
600	-0.0559159877858091
601	-0.0189326476020509
602	-0.010487538442712
603	-2.1094237467878e-15
604	-0.000126830985394233
606	-0.0202331299172348
608	0.00120710008475589
610	-0.00532550628269657
611	-0.0150403809367726
612	-0.016859800277273
613	-0.00850985604838395
614	-0.0137725948038868
615	-0.0102632163666094
616	-0.00912433822612169
618	-0.0297625945019767
619	-0.00155828807110925
620	-0.0121522160183083
621	-0.0040810096569398
622	-0.0264261944270584
623	-0.000744335336973934
624	-8.55602633541563e-05
625	-0.016492978519048
626	-0.0405253154434698
628	-4.80766738889526e-05
629	-0.000311618104714584
630	-2.22044604925031e-15
631	-0.00714059193665395
632	-0.0170192852714747
634	-0.00843248383159778
638	-0.0133362422902806
639	-0.0271952931183794
641	-0.0834839213801024
642	-0.00762658435560248
644	-0.00817234924844612
645	-0.00209361600592584
646	-0.00391751935973572
647	-0.0166195612530284
648	-0.0011506169033535
649	-5.47435056300616e-05
650	1.16635112564767e-05
651	-2.55351295663786e-15
652	-0.0402703386149429
653	-0.0116068623715057
655	-0.00518935882760208
656	-0.0154406726555519
658	0.000330858127762013
661	-0.0123857874788666
662	-0.0118326837791027
665	-0.0232730905568485
666	-0.00601620791006241
667	-0.0544401776792375
671	-0.00348753533464852
673	-0.00189624345518513
674	-2.55351295663786e-15
675	-0.00517445475866374
676	-0.0975679088272751
678	-0.00335435316304766
679	-0.0227802405086656
680	-0.000549542510532741
681	-0.00653141333417695
682	5.09215764814552e-05
684	-0.000121382546171112
685	0.00220177653582432
686	0.00271988810234303
687	0.000324646013224017
688	-0.00498817555784914
689	-0.0161811709810762
690	-0.00433973410587751
691	-0.018480587864473
692	-0.00366905196869893
694	-0.00127295364566071
696	-0.0116639696023003
697	-0.00263417258390064
698	-0.00420152580008459
699	-0.00560932306597539
700	-5.19616214968988e-05
703	-2.33064545774875e-05
704	-0.00894835508718794
705	-0.0131719689956942
707	-0.0217123062753091
709	-0.00271838524415313
710	-0.0109287104991748
711	0.00220368121126235
713	-0.00972179113175231
715	-0.00509892145960833
717	-0.0203088555332418
718	-0.011393589375679
721	-0.0266733184143203
722	-0.0288470534252215
723	-0.0183493789355785
725	-0.000314460679302409
726	3.00823256528249e-05
727	-2.1094237467878e-15
728	-0.00187413432821393
729	-0.000199051338915734
730	-0.00507016411659711
732	-0.00564017770038905
733	-0.000357995710660086
734	0.00112190603750362
736	-9.87506336421751e-05
737	-0.000118012145345348
739	0.000387787035394438
740	0.00246784512879206
741	0.000892392190584457
742	0.00310935985982452
743	0.0010435916828575
744	0.00651824995229866
745	-0.000165162421169152
747	-0.00335906097375893
748	0.00170688204438552
750	-0.0021883940012869
751	0.00542119891728954
752	-0.00116391045234776
753	-0.000653837407212809
754	0.00221161583958263
755	0.00013005325741744
756	0.000461202088453794
760	0.000668123900737783
761	-0.00065531560578258
762	-0.000568446156769986
763	0.000805095433986991
764	3.67771634472991e-05
765	0.000355409454624867
766	0.000621454460143944
767	-0.000623756705321221
768	0.000625371390827967
769	0.000476081768323811
770	0.00373290302509088
772	-0.00104787282132401
774	-0.000442347977935187
775	0.000640434688162439
777	0.00136247372654519
778	-0.000103812330795927
779	-0.000679374526453502
781	0.00221562218548776
782	0.00256414103714564
783	-0.00356458054222075
785	-0.00151245542617795
787	-0.0021207934418932
788	-0.000222567195432011
789	0.000173662129518748
790	-1.13552514976467e-05
791	0.000289951041785974
792	0.000558133205426081
793	0.000361801532014039
794	-0.00091879138298967
795	0.000945299646570197
796	0.00575317300434208
797	-0.00025990071784987
798	-0.00328348120923971
799	-0.00208429594541304
800	-0.000229268359532853
801	0.000868303084627597
803	0.000427785389061408
804	-0.00164739970782724
805	-0.000379939653440742
806	0.000684775063607201
807	0.00178704039846678
809	-0.00240752695990432
810	-0.00535049539899879
813	-0.000193266812368531
814	0.000666268053118424
817	-8.08782746549719e-05
818	0.000997352264201279
819	-0.000400837066245607
820	0.00101870056550546
823	0.000116109182082047
824	0.00318765156580703
826	0.00107509268390005
827	0.000955227920078849
828	-0.00208336396825415
830	-0.00185856439785437
831	-8.94987558588412e-05
832	0.00232822053739079
833	9.54888881508076e-05
834	0.00111083112823518
835	-0.00619651643319696
837	-0.000289873211407388
838	0.00243362081600063
839	-0.00079818375323748
841	-0.000197278630436171
842	-0.000217899461924187
843	0.000568090586605452
844	0.000100571408315542
845	-0.000256891998110409
846	0.00039231632986314
847	0.000623377378707657
849	-0.000923947060820662
852	0.000155036557259347
853	-0.00213843086588061
854	-0.00505893162629723
855	0.00200690809248893
856	0.000176222881098309
857	-0.000337297150238669
858	0.00137736086748186
859	0.00242492947008111
861	-0.00184322965611416
863	-0.00130982096318211
864	0.000228870447686713
866	-0.000484639226956296
868	-0.000990413695720838
870	0.000160498395224029
871	-0.00067560981977477
872	0.000900734456359853
873	-0.000503780605566329
874	0.00260047304376787
875	-0.00232763178389928
877	-0.00244242430884001
878	5.69179324794167e-06
879	0.000677794177738833
880	-0.00337287428655919
881	0.000814630659597637
882	-7.88590437283965e-07
883	-0.000310177116731758
885	0.000370617543852036
886	0.00149559725341963
887	-0.00365054121687358
888	0.0915348196274925
889	0.0304830033721533
890	0.00570175055447608
891	0.00381824680455772
892	0.0556052354797396
893	0.00824909633670157
894	-0.0046593108398007
895	0.00824278851204058
896	0.0278142666667504
898	0.0813276365700226
899	0.0383471925665453
900	0.0682351375806055
901	0.0468724795513253
903	0.0443202578056717
904	0.0537517574588209
905	0.021532740549406
906	0.244850300557397
907	0.0415523026162592
908	0.0367108160863761
909	0.0247536746576476
912	0.0196469706585052
913	0.0275957740287527
915	0.0859712381912732
917	0.00581232397022302
919	0.0291938626298286
920	0.0108544176768465
921	-0.0109813095690478
922	0.00388655016310707
923	0.0338570309333567
924	0.0442197196234138
926	0.00749168460545113
927	0.0759471989260583
928	0.0619574609943526
929	0.0186870026439037
930	0.0438470890596132
931	0.0297790151061686
932	0.138297772496413
933	0.389917419059239
934	0.044546714777899
935	0.0140760047833358
936	0.023971522527933
937	0.05347826927688
939	0.0776646083504616
940	0.0077164470456676
941	0.164368818738178
942	0.0739656049762712
943	0.0143073582496263
944	0.0208877446116408
945	-0.000751435318923022
946	0.00120334016691054
947	0.00998737074678219
948	0.00303864730445219
951	0.140087629871682
953	0.00462744293667972
954	0.00863200823605009
956	0.0265585433111259
958	0.0266028968424786
960	0.158448030432944
962	0.014875282034747
964	0.0064616995560603
965	0.00151710492164153
966	0.0302011907615494
967	0.00779750380942429
968	0.11641982233365
969	0.00930344248886739
970	0.00661173836258444
971	0.00402772904014387
972	0.00914134865209831
973	0.00712982887113767
975	-0.00570043925970881
976	-0.00200329251290421
977	0.0260338158287682
978	0.135285910237964
979	0.049283618766412
980	0.0753587625152726
981	0.0631565896101058
982	0.0807808644635237
983	0.180813581973795
985	0.294074615721223
986	0.159698530277718
987	0.157423138756247
988	0.0209697739973121
989	0.00863405422088703
990	0.00880549197621527
991	0.0171987838399995
992	0.0564243508456465
993	0.00236820279828093
996	0.0508071232856445
997	0.0372883563013295
998	0.00348616551445963
999	0.0233461118056621
1000	-0.000517002459336391
1001	0.0924287455239957
1003	0.0934231659562068
1006	0.0428120335676841
1008	0.0760137369925312
1009	0.0768885510527757
1010	0.0288751241279403
1011	0.0495572365324373
1012	0.156457691344736
1013	0.121464675254427
1014	0.0171248042911456
1015	0.00349488159634997
1016	0.0970993872173919
1017	0.172617864498459
1018	0.00564533032140779
1020	0.0436006253467362
1023	0.217262883098311
1024	0.000338825435328094
1025	0.00732648756391729
1026	0.00216409608184942
1028	-0.00773840357844452
1029	-0.00664637717734662
1030	0.0313064573553632
1031	0.0486534342457092
1033	0.0854168635862286
1034	0.134231381691808
1035	0.106824628083685
1036	0.0175999184114481
1037	0.115114044161518
1038	0.091458001462887
1039	0.241702767275103
1041	0.0220983857219945
1042	0.0133271169529656
1043	0.0530866516685529
1045	0.0184922049754717
1046	0.0177370585891237
1047	0.00338188386286492
1048	0.0187009454910263
1049	0.0772900226325645
1050	0.190800266619706
1051	0.11349997877145
1052	0.0222028418174198
1053	0.0117677836795785
1054	0.036774887232944
1055	0.0571383265470943
1056	0.0536561851032777
1057	0.0199977605788342
1058	0.0273245169614377
1059	0.00677537954536445
1061	0.0212028189115668
1062	0.0226305469557393
1063	0.0798474280884918
1065	0.100540484395221
1066	0.0220875527823949
1067	0.075256579166979
1068	0.053481928515931
1069	0.00108747245099666
1070	0.0102264584265931
1072	-0.0102720914836811
1073	0.0208797247945446
1074	0.0999865909745605
1075	0.0482089078760923
1076	0.0252241106402152
1077	0.0110412696551642
1079	0.024858864598378
1080	0.02133507464455
1081	0.020280020903259
1082	-0.0103203111463046
1083	-0.00613744458041354
1084	0.06973451370043
1086	0.0037466291356385
1087	-0.00226698607460363
1088	0.0294753826781138
1090	0.0433451770820736
1092	0.0108121641558328
1093	0.0394257444210886
1094	0.0228249166779609
1095	0.0233460392316667
1096	0.0335152418728212
1097	0.0807066796615228
1098	0.0887650151753467
1099	0.0397501101756512
1102	-0.00813573781265742
1103	0.10458545733229
1104	0.0326370962639777
1105	0.0220507651915588
1108	-0.0057771266032523
1110	0.0421214692175139
1116	0.00342656322220358
1117	0.0557810704445926
1118	0.0283754872586855
1120	0.010691193430636
1121	0.0236660620761474
1123	0.00105266170460716
1124	-0.00113758064649555
1125	0.0270747523621488
1126	0.0193604207485965
1127	0.0594909789788246
1128	0.020062005045021
1129	-0.0128375606836229
1130	0.0795814685386076
1131	-0.000958276940276115
1133	0.0149057960771216
1134	0.061507402420041
1135	0.00503785607439738
1138	-0.00245813525457522
1139	0.0109505464604927
1142	0.0285023789990196
1143	0.0428399344799864
1144	0.0208489737956306
1145	0.0115066205021149
1146	0.0101841310216573
1147	0.031354390310257
1149	-0.0130636489009929
1150	-0.0221063715616023
1151	-0.0149418840165954
1152	-0.0437476680591445
1153	-0.0228954483717408
1154	0.000602586001900551
1155	-0.00684489662343113
1156	0.0146456237955633
1157	0.017090438763622
1159	-0.0223312355554458
1160	-0.00307329276987756
1162	0.0193103876619263
1164	0.00869430355226392
1165	0.0476287437895384
1166	0.0165273726610831
1167	0.0162044671663549
1168	0.0277148887063178
1169	0.0145221459023394
1170	0.00804926161962732
1171	0.0161837551614876
1172	-0.00120410607060906
1174	-0.0121266639604745
1175	-0.0345392303608883
1177	-0.00826048059341644
1178	-0.042842347853735
1179	-0.0164669145299157
1180	-0.0208532046560304
1181	-0.0152600035528104
1182	-0.0268068240775765
1183	0.0218963644618575
1186	-0.0257941375380749
1187	0.0312060597317685
1191	0.0148736306610662
1192	0.0293447563569081
1193	0.0684414196761076
1195	0.00842023911503625
1196	0.00989745572615286
1197	-0.00693957618629848
1198	-0.00814923609303608
1200	0.0549282225048175
1202	0.00269024110632599
1203	-0.000184737427862625
1204	0.00751732513988895
1205	0.00211138297748675
1206	-0.000508363123422284
1207	0.00405884553756153
1208	0.00046320682887413
1209	0.000178425994488474
1210	-0.00015762793883678
1211	0.0272071143957089
1212	0.0203768040289228
1213	0.231927112167272
1215	-0.00359579904863871
1216	0.00170457940099217
1217	0.023023822952752
1218	0.0420082934855902
1220	0.047538882758483
1221	0.00371496927877019
1222	-0.000333128516501413
1223	-0.00139826772086582
1224	-0.0146945855926552
1225	0.000410542707101946
1226	0.00469590809334663
1228	0.00594782587966414
1230	0.00698984646682882
1231	0.000801590077254444
1232	0.0078834038215021
1234	0.00390634108749399
1235	0.000144410567700537
1238	0.0205864445564459
1239	0.0100844183866835
1241	-0.00164045357917375
1242	-0.00519344749033657
1243	0.015812615247709
1244	0.00852234102353167
1246	-0.000831707333750209
1247	0.00195386885299054
1248	-0.00166768770070458
1255	3.03219061459359e-06
1257	0.000495923474731264
1258	0.000878854199087842
1260	8.63393248291544e-05
1261	0.00136488980280614
1262	0.0140446357461113
1263	0.0375036140784962
1264	0.00787491133111567
1265	-0.00110621664510246
1266	0.100667421117488
1267	0.0192643298197047
1268	0.00649843267555572
1269	0.00913054249009476
1271	-0.00175950361841581
1272	0.00898606007252856
1273	-0.00508954878302881
1274	-0.0107974361948618
1275	0.0368522005538326
1276	0.0458619604322004
1277	0.000403230780115726
1278	0.0398779130918964
1279	-0.000190866728641714
1280	-0.000236343517552196
1282	0.00578062315406819
1283	0.0189129845606366
1284	0.0119304679790199
1286	-0.000588141222779281
1287	0.0155129718748518
1289	0.00842400895126927
1291	0.0311332394403649
1292	0.0374789117580122
1293	0.0238849319398615
1294	0.0116796912393071
1295	0.0439167042312911
1296	-0.00417452975241017
1297	-0.000620739171941109
1299	-0.0094051449636342
1303	0.0173467028636838
1304	0.0142385062305308
1306	0.01651705550348
1308	0.0561541437595994
1310	0.0416601141838615
1311	0.00684766853415464
1314	0.0943587862104261
1315	0.0311899719315422
1316	0.0180917168590097
1318	0.00283435497956858
1319	0.0674501698554009
1320	-0.00725126877854182
1322	-0.0094237644729086
1323	0.0635806336397889
1324	0.0197521319036392
1325	0.0328483110467537
1328	0.0429393009643746
1329	0.0105781545128278
1330	0.0154145669303454
1331	0.00518358677013125
1332	0.00637751692045818
1333	0.0507982472577128
1336	0.0297144855884973
1337	0.0537872822552787
1338	0.0623238676888381
1340	0.141243989654934
1343	0.0944665501309053
1344	0.0822939040832161
1345	0.0108437678618947
1347	0.136201959885486
1348	0.00553057956752623
1350	-0.00962237293106011
1351	-0.00161109656272368
1353	-0.00252472245306767
1354	-0.00243590592584386
1355	0.00010199094925567
1356	0.00141655087221654
1357	0.00292243193183733
1360	0.00431729898120381
1361	0.00144810031126091
1362	0.00660521729709146
1363	0.00964049848807647
1364	0.0064468529528694
1365	0.0202249636849813
1366	0.0142541118954433
1367	0.00669441931333015
1368	-0.00131695190914832
1369	0.0140629832565823
1370	0.0218695847359154
1371	0.0124150243181121
1373	0.00268263450014372
1375	-0.003289553061053
1376	-0.00726148301484369
1377	-0.0011576295413932
1378	0.022596174011034
1379	0.000113796368723385
1380	0.0107352472715672
1381	6.24063072451886e-06
1382	0.00115584309327094
1383	0.0019302655520877
1385	0.000769225128246787
1386	0.00199485803861638
1387	0.00711054757313717
1388	0.0059368345235315
1390	0.00363978771154227
1391	0.00805507928846766
1392	0.00714892868163541
1393	-0.000202353892768348
1394	0.00794366174414857
1395	0.00635422385018897
1398	0.0282336925521813
1399	-0.00169754858923188
1400	-0.00416823003551647
1401	-0.00335852858984648
1402	-0.00091529090320408
1403	0.00351461254121233
1404	-0.000157726185762985
1406	-0.00264155721803344
1407	0.00111846090717266
1409	0.00584425795601645
1410	0.0096339543936898
1412	0.00742885383523584
1416	0.0142370197528277
1417	0.015503501681255
1418	-0.000194353311111728
1421	0.00767175294470435
1422	0.00865345005022111
1423	0.0113819280805152
1424	-0.000278122070957565
1425	0.00521195972904936
1427	-0.0119681783391554
1428	-0.00675035721999973
1430	-0.00169552747634943
1431	-0.000533762031964646
1432	0.000268711303664404
1433	0.000561574919121677
1434	0.00190971042257737
1435	0.00431340826013676
1436	0.00304733336225704
1437	0.0111526016460049
1439	0.00663513034167779
1440	0.0103241016966335
1443	0.00425889262654489
1444	0.0194113385731054
1446	0.00170958765784296
1448	-0.000186003111789845
1449	0.0039320920765063
1450	0.00802737841137302
1451	-0.00250762853744196
1452	0.00162444908246623
1453	-0.000491265377911998
1454	0.00219414300866261
1455	0.000117051381571143
1456	0.00380820774311219
1458	0.013448165004268
1459	0.000233088466683518
1460	0.00104840128017508
1461	0.00551183873099464
1462	-0.000370474724451092
1463	0.00207148722642669
1465	0.0100936646661678
1466	0.0122734776852663
1467	0.00711087627370338
1469	0.00625270435111569
1470	0.001616947037344
1471	0.00534450185095009
1472	-0.000603739209268539
1473	-0.0043844233162697
1476	-0.00210093347965834
1477	0.00304852830690278
1478	0.0197874580529032
1480	-0.0052292274866394
1481	0.000435440721441582
1482	-0.000169963362154801
1483	0.0171676259816295
1484	0.000930315623869304
1485	0.00267340316743003
1486	0.00871883619077041
1487	-0.00298808091441796
1488	0.00247717816034637
1489	0.00979566051933162
1490	0.00953606321781053
1491	0.000254454119046454
1492	0.0120185289501055
1493	0.0136884499715098
1494	0.015107090820911
1495	0.00273317722771149
1496	0.00533321006878734
1497	0.000232036744288122
1498	-0.00699608008591895
1500	0.00461636033592716
1501	0.00469962106576538
1504	0.00307286104893129
1505	-0.0159509714697734
1508	-0.016955243055586
1511	-0.120878318710007
1512	-0.0613320050064001
1513	-0.00339563840718338
1514	-0.0271686557076493
1515	0.0107415862217407
1516	0.0124668055648135
1517	0.0166102359650908
1518	0.0329495290725777
1519	0.0400258582519117
1520	0.0677363208764382
1521	0.0542746857270469
1522	-0.00374569082286447
1523	0.00130832889817384
1525	-0.00278907166628994
1526	-0.00188118829127237
1528	-0.0416625437764986
1529	-0.0244532107564512
1531	-0.0187670641888198
1532	-0.00955003606266774
1533	-0.0202002490039032
1534	-0.0756676142287333
1535	-0.0247032521032298
1536	-0.00384874088786213
1537	-0.0103047652528266
1538	-0.011446608852427
1539	-0.00235261513714685
1540	-0.0206459255818548
1541	0.0202341518945309
1542	0.00733127763612257
1543	0.00707848860779725
1545	0.00834554076203381
1547	-0.0251814599360571
1548	0.00389089867920145
1550	0.00285788391755865
1551	-0.0201013186102887
1552	-0.0282962163414079
1553	-0.000857433687469045
1554	-0.00308863911347573
1555	-0.0263326498876515
1557	-0.0668543396690029
1558	-0.0208646722081235
1559	-0.0102768356946097
1560	-0.0229300017299909
1561	-0.00795285397674234
1562	0.00248373718165673
1565	0.0112567056749337
1566	0.0364676782679728
1569	0.0091954612344306
1570	-0.0154968414490436
1571	-0.00673562993111609
1572	-0.00797203003769859
1573	-0.0119186920994405
1576	-0.0776358451918233
1578	-0.0073539736764609
1580	-0.0443283900017482
1581	0.00119670218703383
1582	-0.0013758103635062
1583	-0.0162389925999917
1584	-0.0151740809428519
1586	-0.00167220345098151
1587	0.00432728627383255
1588	0.0142590220726529
1590	0.0348692683501649
1591	0.0171548162339417
1593	-0.00123014922768594
1595	-0.00365115918682585
1596	0.000409392185575452
1598	-0.000740166814522047
1599	0.000341810425266431
1600	-0.0209204532951536
1601	-0.00482354797342299
1602	-0.0193490471848628
1604	-0.0281025326991743
1605	0.000358653135959008
1606	-0.000175215051494537
1607	0.00496086963114239
1608	0.00687523675463486
1609	-0.00182648633625199
1610	0.00242091017745633
1612	0.0245812457772514
1613	0.0477357165281765
1614	0.0165299099033502
1615	0.00581274724030634
1616	-0.000683246981984076
1617	0.000285874359682581
1618	-0.00363570061725504
1620	-0.00617147610884328
1621	-0.00194167024583619
1622	-0.00292105558303896
1623	-0.00684058519069963
1624	-0.00930238728191901
1625	-0.013174561274221
1626	-0.0157638664837403
1627	-0.00329842303700895
1628	-0.0290662744239348
1629	-0.00585584756206947
1631	0.00454273395071064
1632	-0.00505782177687913
1633	0.00808408325351012
1634	0.0106478460116642
1638	0.00115698616838361
1639	0.00508060772695085
1640	0.00384426585430397
1641	0.0176274981791698
1642	0.0180712046953122
1644	0.0605558502961876
1645	0.0259600671191373
1646	0.000521734661114159
1647	0.00293317963454559
1648	0.0216311226132437
1649	0.0700620527407765
1650	0.00232196542149093
1651	0.00395631614155467
1652	0.00207059735156662
1653	0.00713224271806373
1654	0.0709378747135788
1655	-0.0153644391559259
1656	-0.00118318966166037
1658	0.00349491479219882
1659	0.006136906656526
1661	0.00774740118945921
1662	-0.00459379338187282
1663	0.010815524803267
1664	0.00791286528241181
1665	0.0333347673786525
1666	0.00513553094832209
1667	0.000113783978473558
1668	0.00386444451325479
1669	0.000867052630331322
1671	0.0207101221515854
1672	-0.0159311997526536
1673	-0.00226378690008611
1675	0.00652921458466343
1676	0.00255938873730027
1677	0.0134895689425978
1678	0.0264999952784923
1681	0.000364262248541858
1683	0.0173906731883347
1684	0.00194059996781354
1685	0.000119055823035841
1686	0.00154207839033327
1687	0.0995630618688848
1688	0.0242117537154885
1689	0.0152401534485246
1690	-0.01592829126094
1691	-0.00264545930961935
1693	0.00136390089704203
1694	0.028147519349406
1696	0.0407128323026281
1697	-0.000354236713128064
1698	0.0149018861086159
1699	0.0311302410085307
1700	0.00949452227143621
1701	0.0109219104210024
1703	0.00249663262562572
1704	0.00697912207928003
1705	0.0165464026388839
1706	0.020226287217205
1708	-0.00980717425565863
1710	0.00708718679608666
1712	0.00567763578733205
1713	0.00945685806783808
1714	0.00769812469084058
1716	0.00548708873365777
1717	0.00142393018916193
1721	0.00210520646932921
1724	0.00941781980623141
1725	0.0184161164451617
1726	-0.0124918693685711
1727	-0.00450927540734591
1731	0.00330836975796028
1732	0.0176368846556297
1733	-0.0026238161197667
1734	0.0124889255317671
1735	0.104387568077825
1736	0.000238757798957157
1737	0.000853408566160729
1739	0.000307349422226377
1740	0.00530056509674337
1741	0.00216847275325321
1743	0.0448929725333692
1745	0.033988633439295
1747	0.133816175034152
1750	0.0546650584257625
1752	0.0108784491669404
1753	0.050501734862314
1756	0.0262557162897426
1757	0.0315962324885246
1759	-0.0466375066228689
1760	-0.000838007935752172
1761	-0.0133195359421927
1762	-0.0431424898828622
1763	0.0444015606457948
1764	0.0198663307174938
1765	0.0246086099684764
1766	0.0356992738193246
1767	0.0235104958039992
1768	0.0702407024263541
1769	0.0251335419539411
1770	0.050151068576839
1771	0.00991085805348413
1772	0.0474085863430662
1775	0.0285176434248997
1776	0.0459705660724276
1777	-0.00462395863487242
1779	-0.00299763070643733
1780	-0.0610344768447176
1781	-0.0351623680916379
1782	0.0324287362612432
1783	0.0129727196626775
1784	0.068005415395572
1785	0.0451590674455907
1786	0.0401489121546666
1787	0.0567987762651857
1788	0.0285023127219338
1789	0.0508118988974358
1790	0.0196245604229155
1793	0.0162099304874448
1794	0.00868288727153416
1795	0.0121427253792011
1796	-0.0202487388380483
1797	-0.0272436239304383
1798	-0.0397306144384316
1799	-0.0324864757155335
1800	-0.100042092921948
1802	0.0479956969458628
1803	0.0725608005140474
1805	0.0294860991267339
1809	0.03071252768622
1810	0.00142796707417187
1811	0.0132146609977279
1812	0.0051290781991512
1813	0.00999080899742644
1815	-0.0291267469811476
1816	-0.0212547713402415
1817	-0.0435102254836658
1818	0.0154536782916512
1819	0.0496481920902174
1820	0.0323465826235052
1824	0.0173460885928486
1826	0.0323789792052185
1827	0.0573813158428189
1829	0.0159705750805965
1830	0.0040712909666149
1831	0.0925491578891418
1832	-0.00582792266668297
1833	-0.0333073676306943
1834	-0.0459419390411792
1835	-0.10730115456817
1836	-0.0349704296711972
1837	0.030688009858323
1838	0.0375113568412007
1839	0.0131924277119874
1840	0.0383542925122606
1841	0.0357540280307135
1842	0.0444716742928818
1843	0.022523352441289
1845	0.0629425830227353
1846	0.0539403868487048
1847	0.040964500692975
1848	0.0425527345037217
1849	0.00902776645718434
1850	0.0253393180963214
1851	-0.017962463068532
1852	-0.0439428122853397
1853	-0.0510700321940412
1854	-0.0336113044757124
1855	-0.121022344995541
1856	0.00685510423425106
1857	0.00364084575845952
1859	0.0105668548527233
1860	0.00472671295677751
1861	0.00864168419602662
1862	0.00253750236245137
1863	-0.0068747109386893
1865	-0.00773252472491281
1866	-0.0111762843172664
1867	-0.00788504703351078
1871	-0.0100581567242883
1872	-0.0155868243750169
1873	-0.00841776942150285
1875	-0.0044181494996538
1877	-0.0202427655433203
1879	0.017977522640711
1882	0.0218672338209234
1883	0.00328048303346579
1884	0.0316787658569382
1885	0.00375330110944133
1886	-0.0036093936657276
1887	-0.00498682755407637
1889	-0.0286382042598129
1890	-0.0332107999398149
1891	-0.00893461877757301
1892	-0.0110638348894154
1894	-0.00658819843912822
1897	-0.00807410658349661
1898	-0.00146982113222527
1899	-0.00751395484539807
1902	0.00918699566758346
1904	0.00739211626092845
1905	0.00340973254942445
1908	0.00393956148654906
1910	-0.0155872643941443
1911	-0.0103871139962444
1912	-0.0174950186339123
1913	-0.00128904380895917
1916	-0.0170528507675384
1917	-0.00849528533613292
1920	-0.00937340519912017
1921	0.000478927087506686
1922	-0.00345181093406177
1923	-0.0277007308862396
1924	0.00622597554328652
1925	0.00491844519962903
1926	0.0096489311309913
1927	0.0091423980131341
1928	0.00188518442684293
1929	0.00598513178251736
1930	-0.00305446116570601
1931	-0.00296884733728031
1932	-0.0124451413778762
1933	-0.0068044375741258
1935	-0.00423492085091076
1939	-0.0149304436674125
1940	-0.0204305882342105
1942	-0.00863384276306989
1943	-0.00600444956640073
1944	-0.00842932170542737
1947	0.0509340263065079
1949	0.0250436729065434
1950	0.0272753954069561
1951	0.0225828034225163
1952	0.018142048242947
1953	-0.00365043926961989
1954	-0.00405872957631748
1955	-0.00453301287583802
1956	-0.0194903027088261
1958	-0.0298877715310133
1960	-0.0142722728450856
1961	-0.0161325683587301
1963	-0.0156049895042807
1966	-0.0224165882561235
1967	-0.0306036276863883
1969	0.0835235372185464
1970	0.0533614421274878
1971	0.0425508105543598
1972	0.0430044444553969
1975	0.0181653709753307
1976	0.010547094910569
1977	0.000322414951051619
1978	-0.0399106295418125
1981	-0.0365538542836665
1982	-0.0480055526324254
1983	-0.0228042059518048
1984	-0.0270350001636323
1985	-0.0375703187323886
1987	-0.0232184198943951
1989	-0.0312626602735673
1990	-0.045014457914639
1991	-0.0471577868675015
1992	-0.0351576427038269
1993	0.00367564825625716
1994	-0.0664352068809515
1995	-0.0582154899409897
1996	-0.110375019112893
1997	-0.092307479095928
1998	-0.0817435170866068
2001	-0.109116978387402
2002	-0.159141633655497
2005	-0.0765147549494857
2007	-0.0388707655085543
2008	-0.107525377625565
2009	-0.0120417394785785
2010	-0.0181896026453037
2011	-0.00102325307975276
2012	-0.0629402350710929
2013	-0.00664480620907476
2015	-0.0101996937580895
2017	0.013204224217328
2018	-0.0706895055799802
2019	-0.0960926509066891
2020	-0.0713752253762195
2022	-0.0270760290486305
2023	-0.000172046437504847
2024	-0.161806020543716
2025	4.9960036108132e-16
2026	-0.245578855042702
2027	-0.0703486264970897
2028	-0.00702922209776352
2029	-0.0093726333066253
2031	-0.000179904113884632
2032	-0.00852612481563281
2033	-0.00269779182740243
2035	6.66133814775094e-16
2036	-0.0455205241602794
2037	6.66133814775094e-16
2039	-0.0563150415207037
2040	-0.00788851764869131
2041	0.0111572245287912
2043	-0.0947442373075253
2044	-0.136646464045639
2045	-0.0916554863920139
2047	-0.00269422989483853
2048	-0.188896173593852
2049	-0.00257664295346965
2050	-0.227907261999357
2051	-0.00128786615921311
2055	-0.0416978116046827
2056	-0.0180940060964552
2057	-0.00573782365735742
2059	-0.00300170862627941
2061	-0.000427693103763449
2062	-0.000256373140052835
2063	0.0125636267562659
2064	0.0195360571819604
2067	-0.157924495041477
2068	-0.116403133607679
2071	-0.00119790221689187
2072	-0.083998816921919
2073	-0.00126611360245893
2074	-0.195702964515104
2075	-0.00664165358978624
2076	-0.00267944059077657
2077	-0.000534415428179169
2078	-0.0022328919090413
2079	8.32667268468867e-16
2081	-0.0400439282337072
2082	-0.00113751397673217
2087	-0.0615308811253839
2088	0.0653232864918059
2089	-0.0129714728205635
2090	-0.129792620041674
2091	0.0317857921822116
2092	-0.0551228207188744
2095	-0.000368875728064821
2096	-0.00141637120958332
2097	4.9960036108132e-16
2098	-0.00179705562938098
2099	-0.00136509597092083
2101	-1.45304939405122e-05
2102	-0.0045927789781946
2105	7.21644966006352e-16
2107	7.7715611723761e-16
2109	6.10622663543836e-16
2110	-0.0123702627006123
2111	-0.0491568647771712
2112	0.0242473172694302
2113	0.00153906755820693
2114	-0.0130378173090862
2115	-0.00266181440522051
2117	0.00395884949790468
2118	0.00575361674406921
2119	-0.000353051457874287
2120	-0.00152570186382267
2123	-0.0019809854895822
2124	-3.9992587613169e-05
2125	9.43689570931383e-16
2126	-0.000457307651026695
2127	-0.00560930231113149
2128	9.43689570931383e-16
2129	8.32667268468867e-16
2130	-0.000441482618289302
2131	6.66133814775094e-16
2132	-0.0413321485500289
2133	7.7715611723761e-16
2134	-0.00061493890721015
2135	-0.00238266433476952
2138	0.00144599319496708
2139	0.000163019309417201
2140	-7.96056141947332e-05
2141	0.000683263220495334
2142	0.000625656523083107
2143	-5.86215037694515e-05
2144	-0.000758483182657199
2145	-0.0118265817439744
2146	-0.00702765740357986
2147	-0.00053249307465042
2149	-0.00524044902659815
2150	0.000252342046735521
2151	-0.00224930540022344
2152	-0.0010965970309128
2153	-0.000363182855600275
2154	-0.00025152398405337
2155	0.000473365605387577
2156	-0.0027508362896484
2158	-0.000772386780843404
2159	0.000713373806992268
2160	-0.000526079178035599
2162	0.00145134674197867
2166	0.00125134186886161
2167	0.00691266357928066
2169	0.00158743680628232
2171	-0.0348506337545864
2172	-0.00259916412213185
2174	-0.000893719884207222
2175	-0.000457948394000485
2176	0.00116622853481213
2177	0.0281176837415252
2178	0.000304094228412821
2181	-0.000587090540778323
2182	-0.011243784948972
2183	-0.000723752476507467
2184	0.00230931221010444
2185	-0.00294353717153756
2188	-0.000667089027006795
2189	-0.0018776088740467
2190	0.00117652346045616
2191	0.000390831550433846
2193	0.0013885541064943
2194	-0.00607807831314056
2196	-0.00117965014470245
2197	-0.00051502962454808
2198	0.000149608150849412
2199	0.00050981279438217
2200	0.0028117883832578
2201	0.00371991223535106
2202	0.000792627227171383
2204	-0.00422671652863021
2206	0.000457540889299113
2207	0.00101138705406778
2209	4.74577678128973e-05
2211	-0.0117114554932868
2212	-0.00143736731849053
2215	0.00623815301165254
2216	0.00177475168900615
2219	0.000616162529195774
2220	-0.00245598028427407
2221	0.000193767820984292
2222	0.000575934409568934
2223	-0.00437030630236557
2224	0.000722921841803004
2225	-0.0630210180025809
2226	0.0340331832756891
2227	-0.00059658439053456
2228	-0.0107216503532341
2229	-0.00857238263342036
2231	0.00144916091910946
2232	-0.0449340761892448
2233	0.00239510621702904
2235	-0.0202186795963794
2236	0.00202375766843055
2237	0.0134767012504568
2239	0.0603096173424508
2242	-0.0012168772181636
2243	-0.00216172871128434
2245	-0.00484355689127991
2246	0.0203548618376977
2248	-0.000538871056324219
2250	-0.00258219401926085
2253	0.0020584941257652
2254	-0.0334107338525208
2255	-0.00383108883660471
2257	-0.00149317774894692
2258	0.00122159663055471
2259	-0.000618345495962069
2260	0.0109266896348038
2261	0.00264047579073551
2262	0.00123958701689431
2263	-0.0211404364204333
2264	-0.000600684296292897
2265	0.00112916836172461
2269	-0.0189482508297344
2270	0.0011236773651811
2271	-0.0551252849992501
2272	0.0296738969237519
2273	0.0267446913351408
2275	-0.000406329412132533
2276	0.0149126784476399
2277	-0.00248927585868264
2278	-0.000465629299855608
2279	0.00839509482140433
2284	-0.00610883127039541
2285	-0.0659057900149381
2287	-0.00648176971650194
2290	0.0357911126186021
2293	0.082126806742723
2294	0.198789841927832
2296	0.0484797982900968
2297	0.0419137524495433
2298	0.0193231266509879
2299	0.0255141529527043
2300	0.00293542300704341
2301	0.000835909938244006
2303	-0.0198230716855042
2304	0.0284323416112301
2305	-0.010893715727345
2306	-0.0131127844558228
2308	-0.0132903172006755
2309	-0.0474262792527582
2311	-0.0336221138501763
2313	0.00422264360329716
2316	0.00641364591132354
2317	0.0655859301518473
2318	0.0303821303095718
2319	0.107635999993394
2320	0.023643397582943
2321	0.0203136567223857
2322	0.000574587645041591
2323	0.00781072659233661
2324	0.0039054772700039
2325	0.00313158536813507
2326	-0.00856690230905799
2328	0.00972460859427704
2329	-0.0100234298419677
2331	-0.030396129186781
2332	-0.0119610804631165
2333	-0.062251531466293
2334	-0.0626822296600998
2335	-0.0452800834847943
2336	0.0140211707628409
2337	0.0194299382762371
2339	0.0186841197552192
2340	0.00501411919149608
2341	0.0675377654336196
2342	0.00297889645912475
2344	0.0309684095533662
2345	0.0894031953922345
2346	0.0112045637998573
2347	0.0173397547450189
2348	0.00361727624786012
2349	-0.00328377844949834
2350	0.00533275422903134
2351	0.00928702050903163
2352	0.0111917983993435
2353	-0.0156275373291412
2354	0.00170418865696265
2355	-0.0422835010916226
2357	-0.0640186972825852
2360	-0.00123273361017839
2361	0.0342069070758231
2362	0.00070596260497735
2363	0.0774433298959492
2364	0.0432653749879567
2366	0.0066987777311418
2367	0.0417123554621695
2368	0.0389909246006364
2370	0.00595117710752729
2371	0.00460066110436691
2372	-0.00069660425058915
2373	-0.0124840029937781
2374	-0.0106510973647646
2375	0.00838679228157502
2377	-0.0133285466394802
2379	0.000417401853923582
2380	-0.031589573177312
2381	-0.109117159526317
2382	-0.102341028472096
2383	0.00660440213823144
2385	-0.00699049050308165
2387	0.0118743894405053
2388	0.0196047746220527
2389	0.0371813570137999
2390	0.0288625740475393
2392	0.0219735649998457
2393	0.0203403092856748
2395	0.000808710937728607
2396	-0.0167161559580902
2397	-0.0108925493868246
2398	0.00393804579349177
2399	0.0105196444880136
2402	-0.00778639300184492
2403	-0.071162641002058
2404	-0.0625686776808807
2405	-0.0526763474926146
2406	-0.0331243108745574
2408	0.0185697331514875
2410	0.0346410997697161
2411	0.0278512641533958
2412	0.00480618759459728
2415	0.0221994044712496
2416	0.0185586820732362
2417	0.0107939761812672
2418	0.0187144474731808
2419	0.0285778235691345
2420	0.0709209697241453
2422	0.0675948209896987
2424	0.0042398366933416
2425	0.0457891722685889
2426	0.0577013546142859
2428	0.0606113229322572
2429	0.0456093796589297
2430	0.0228078540506237
2433	0.008592007577153
2436	0.0611851224355482
2437	0.127942208538627
2441	0.00243267537287528
2442	0.0116794266346714
2446	0.00653737900122153
2448	0.0287329716819695
2449	0.0130585624307233
2451	0.00783662926220213
2453	0.0165608171081425
2454	0.145806942388156
2455	0.0773727132015403
2457	0.0387369956031023
2458	0.122199613276204
2460	0.031036112860606
2461	0.0285098541665991
2464	0.0933682720537751
2465	0.079015007549274
2467	0.0793610923172725
2468	0.079451722319416
2469	0.022325894368545
2474	0.041901943234487
2476	0.0170485683971764
2477	0.00124609331881365
2478	0.0121530722464773
2479	0.033181277062894
2480	0.00658829096582753
2481	0.110588693952757
2482	0.00953164034627885
2483	0.133311396157506
2484	0.00360546044518789
2488	0.108035888174242
2489	0.0236460068774624
2490	0.00869462439157392
2491	0.00825204095598125
2492	0.0273684782635747
2493	0.0170579755744671
2494	0.0162497054512854
2495	0.085401361835438
2496	0.0249537290798486
2497	0.0683111724224373
2498	0.0601425658299036
2499	0.010944754328212
2500	0.0311878707894794
2501	0.155462358730721
2503	0.0520635411619482
2504	0.0510292251070728
2505	0.000536902811742679
2508	0.00316171399527748
2509	0.00622878437662927
2511	0.0194543139285368
2512	0.0154653870296563
2513	0.0179583696620527
2514	0.0664208909381466
2515	0.0150097484833217
2517	0.00277083228854647
2519	0.0151370326146664
2520	0.0535101699448784
2521	0.00799143023010312
2522	0.0297340321321036
2523	0.00958169299444628
2524	0.0100886302123774
2525	0.00193433753477823
2526	0.00313067062783257
2527	0.0631534784627772
2529	0.131580823782683
2530	0.0218634454501013
2531	0.0553128802640513
2532	0.125627860206307
2534	0.0111397420493701
2535	0.0725283512429774
2537	0.0230855965977059
2538	0.0322215725075087
2539	0.00309131332672297
2540	0.0508632041011263
2542	0.138292878641202
2544	-0.00193484883140643
2545	0.00374574466692407
2546	-3.81839064962919e-05
2547	0.00187226028996895
2550	0.0074431421109194
2551	-0.0011319960857229
2552	0.00438604202886467
2553	0.000140613998991013
2555	0.0025749217662282
2556	0.00359469967799841
2557	0.00880689943828866
2558	-0.000308199031748502
2559	-0.00108191188193024
2560	-0.00180552522382321
2561	0.00041489084440649
2562	0.000233569532603284
2563	-0.000449479857073387
2565	0.00608910258834461
[truncated: 4,009 more rows]
