# Supplementary material for: A methodology for the design of experiments in computational intelligence with multiple regression models
Source: PeerJ. 2016 Dec 1;4:e2721. doi: 10.7717/peerj.2721 (PMC5136129; doi:10.7717/peerj.2721)
Supplement: Data S1 — Datailed results from UC Irvine Machine Learning Repository (Housing, Machine CPU, Wine Quality, Automobile and Parkinson) and the 3 Use Cases (Protein Corona, Gajewicz Metal Oxides and Aquatic Toxicity) [file peerj-04-2721-s001.zip › 5_parkinson/RRegsResAvgs.csv]

	RegrMeth	CVtype	adjR2.tr.Avg	RMSE.tr.Avg	R2.tr.Avg	RMSEsd.tr.Avg	R2sd.tr.Avg	adjR2.ts.Avg	RMSE.ts.Avg	R2.ts.Avg	corP.ts.Avg	adjR2.both.Avg	RMSE.both.Avg	R2.both.Avg	NoModelFeats.Avg
1	rf	repeatedcv	0.995742021462438	0.0413234030053301	0.970221705289885	0.00468001281611815	0.00717444882687565	0.97186601626473	0.0402440085654634	0.97209615110101	0.985947185345148	0.989750431685146	0.024461887807885	0.989771370537679	12
2	rfRFE	repeatedcv	0.986127952565845	0.0864969134343577	0.894769904925095	0.00376648286405828	0.0105076270589268	0.899466198350715	0.0842907031150904	0.900288560736394	0.94883219932077	0.963120195202344	0.0521490490378092	0.963195536989469	12
3	svmRadial	repeatedcv	0.71877272819565	0.142410081854619	0.635386809885852	0.00611076397661919	0.0295683413977544	0.633976733498543	0.142388128802673	0.636970788848249	0.798066364648817	0.697817380826298	0.129613472497366	0.698434709976806	12
4	nnet	repeatedcv	0.565284167747765	0.159611155977244	0.542577225303964	0.00702645293620402	0.0394827087832798	0.541181548453398	0.159556549126426	0.544934664621469	0.738145224823673	0.560120939414144	0.156315057239481	0.561019568751398	12
5	svmRFE	repeatedcv	0.505646654736347	0.173178393577783	0.473047900404762	0.0035630295732543	0.0285020629610676	0.47496971476807	0.172661669908476	0.479264441027636	0.692122512350841	0.498992873123378	0.16943078958697	0.500016381043453	12
6	glmnet	repeatedcv	0.14934799894719	0.217795465456082	0.147988299755874	0.00472674454154162	0.0279388711096817	0.14695754028158	0.217408193902903	0.153819843951636	0.391861930415494	0.150423890261005	0.217166351310914	0.15213057350071	11.8
7	lasso.RMSE	repeatedcv	0.149628580508555	0.217791539916909	0.14801186405989	0.00474517478648733	0.027926042764839	0.146921408730089	0.217397534124496	0.153784022801551	0.391805659019225	0.150616465973259	0.217127856283942	0.152322760733465	11.8
8	lm	repeatedcv	0.149969519815437	0.217866608408986	0.148148332628208	0.00499494368458309	0.0285986140043181	0.146534520593026	0.217453317627137	0.153515833308012	0.391403429124911	0.150746179631039	0.21708830671276	0.152481121041395	12
9	glmStepAIC	repeatedcv	0.14987041669534	0.21783230647497	0.14837410089754	0.0049820030745157	0.0285584692286333	0.146461122752795	0.217461225585425	0.153443035859111	0.391305876090599	0.150656015724842	0.217099720497325	0.152391141331124	12
10	pls	repeatedcv	0.113705472282608	0.221801927424758	0.1156389120301	0.00447073558113823	0.024597251838024	0.114130412925713	0.221479733707755	0.121376789916096	0.347981340026179	0.115592751840285	0.22153061362379	0.117399508220591	12
