# Supplementary material for: A methodology for the design of experiments in computational intelligence with multiple regression models
Source: PeerJ journal article supplement (doi:10.7717/peerj.2721), 2016-12-01

**Train Yobs-Ypred**

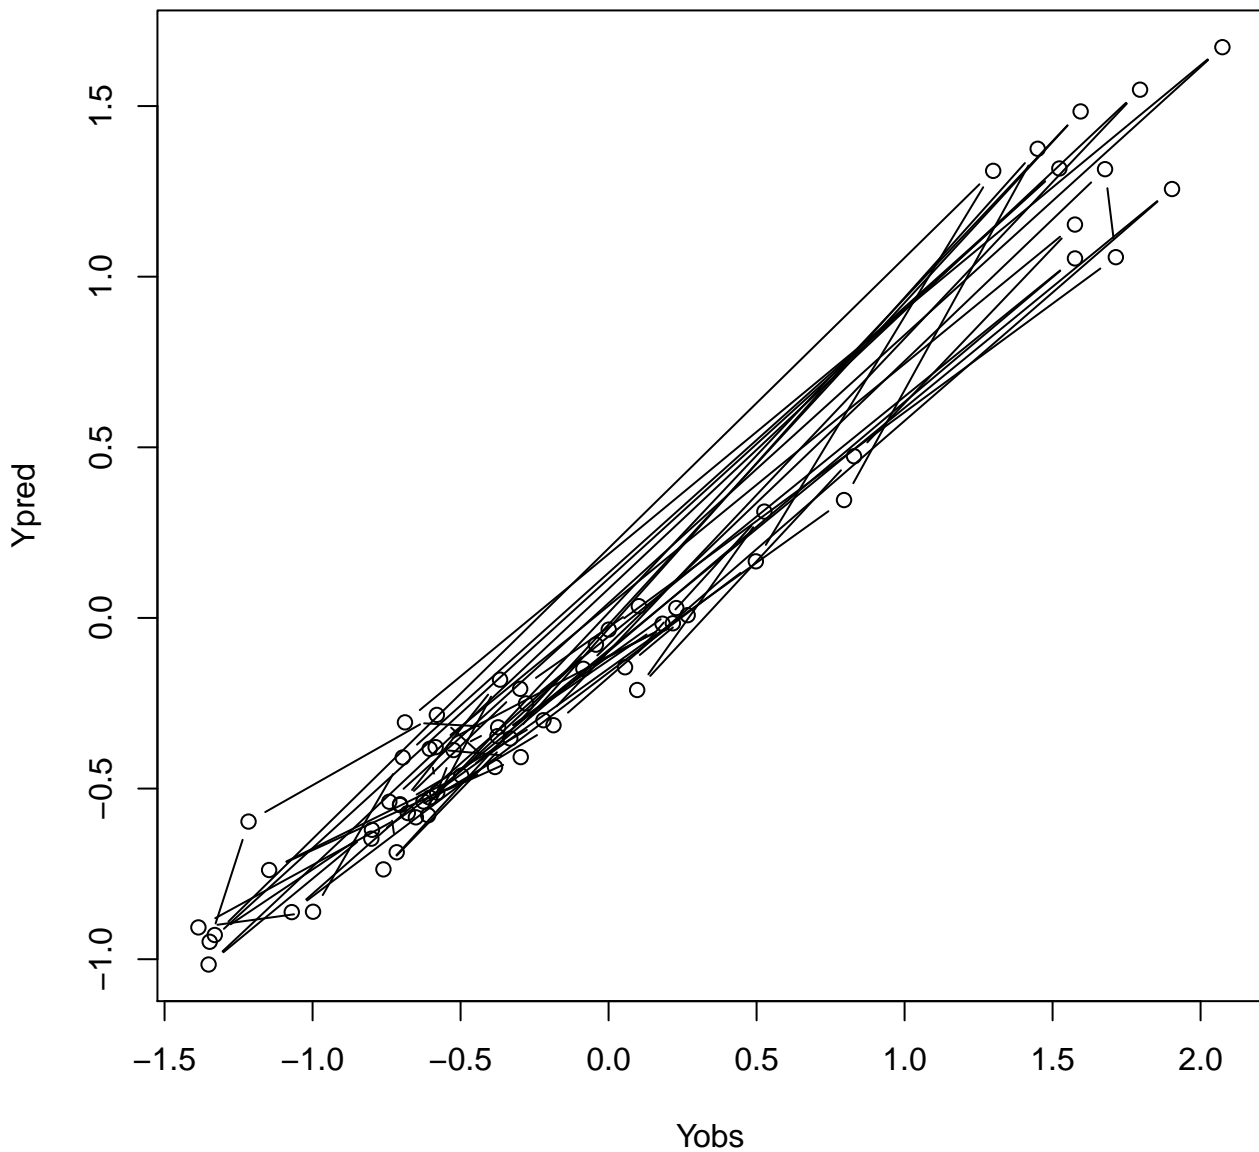

# Test Yobs-Ypred

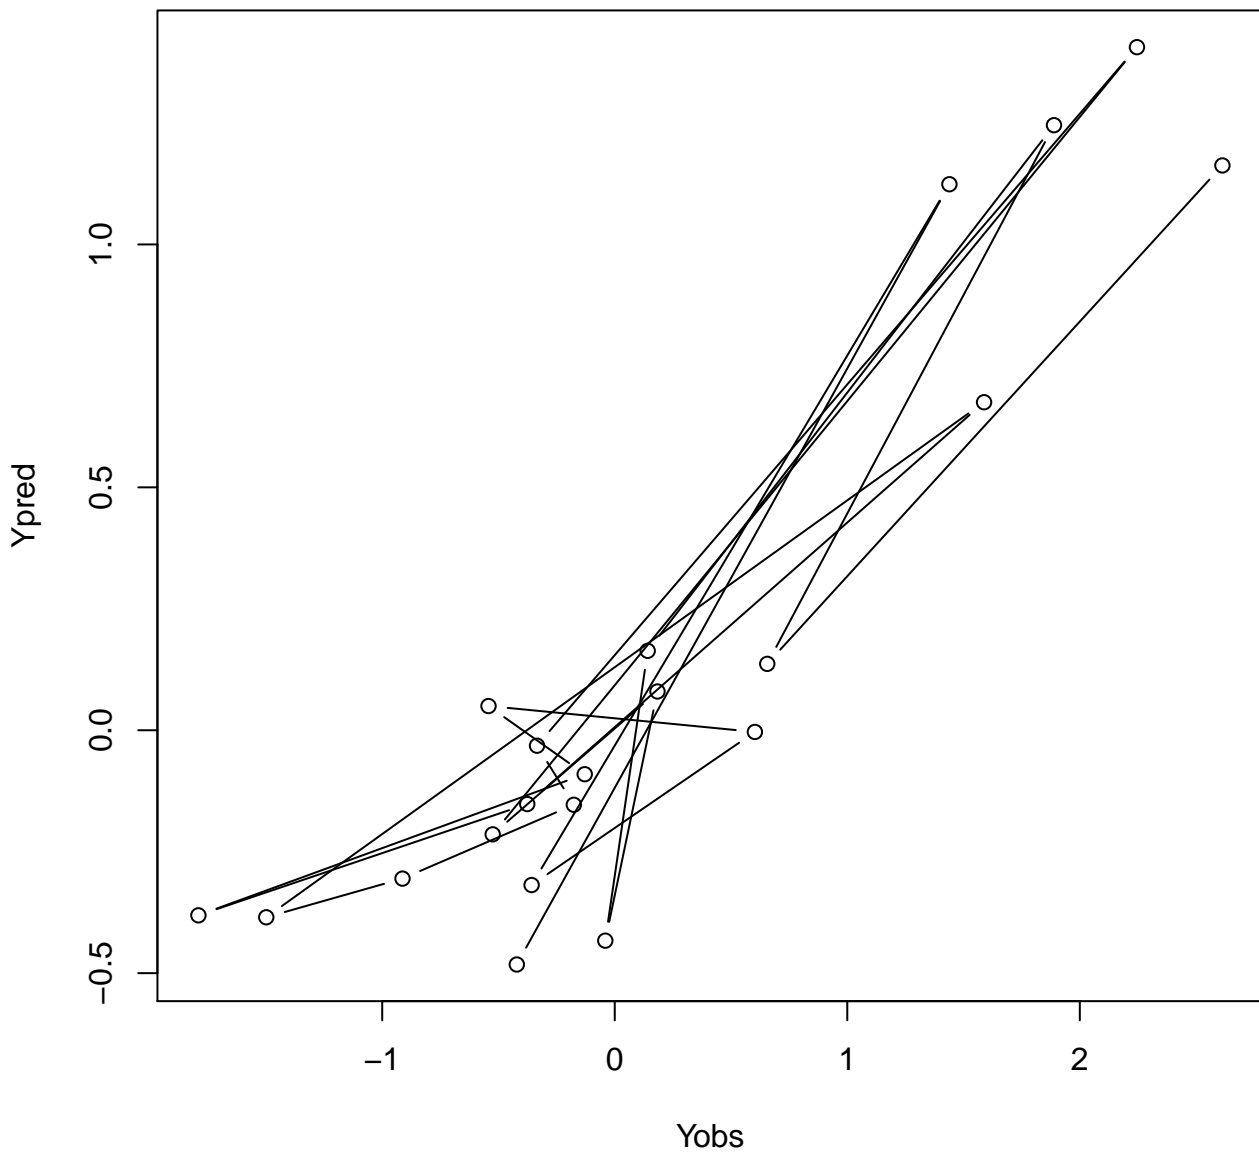

The scatter plot displays the relationship between the number of iterations (x-axis) and the error (y-axis). The x-axis is labeled from 0 to 4, and the y-axis is labeled from 0 to 1. The data points show a rapid decrease in error as the number of iterations increases, following a curve that approaches zero error as iterations increase.

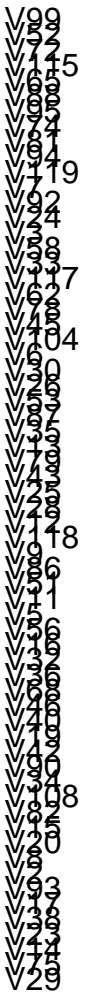

**Fitted vs. Residuals for Fitted Model**

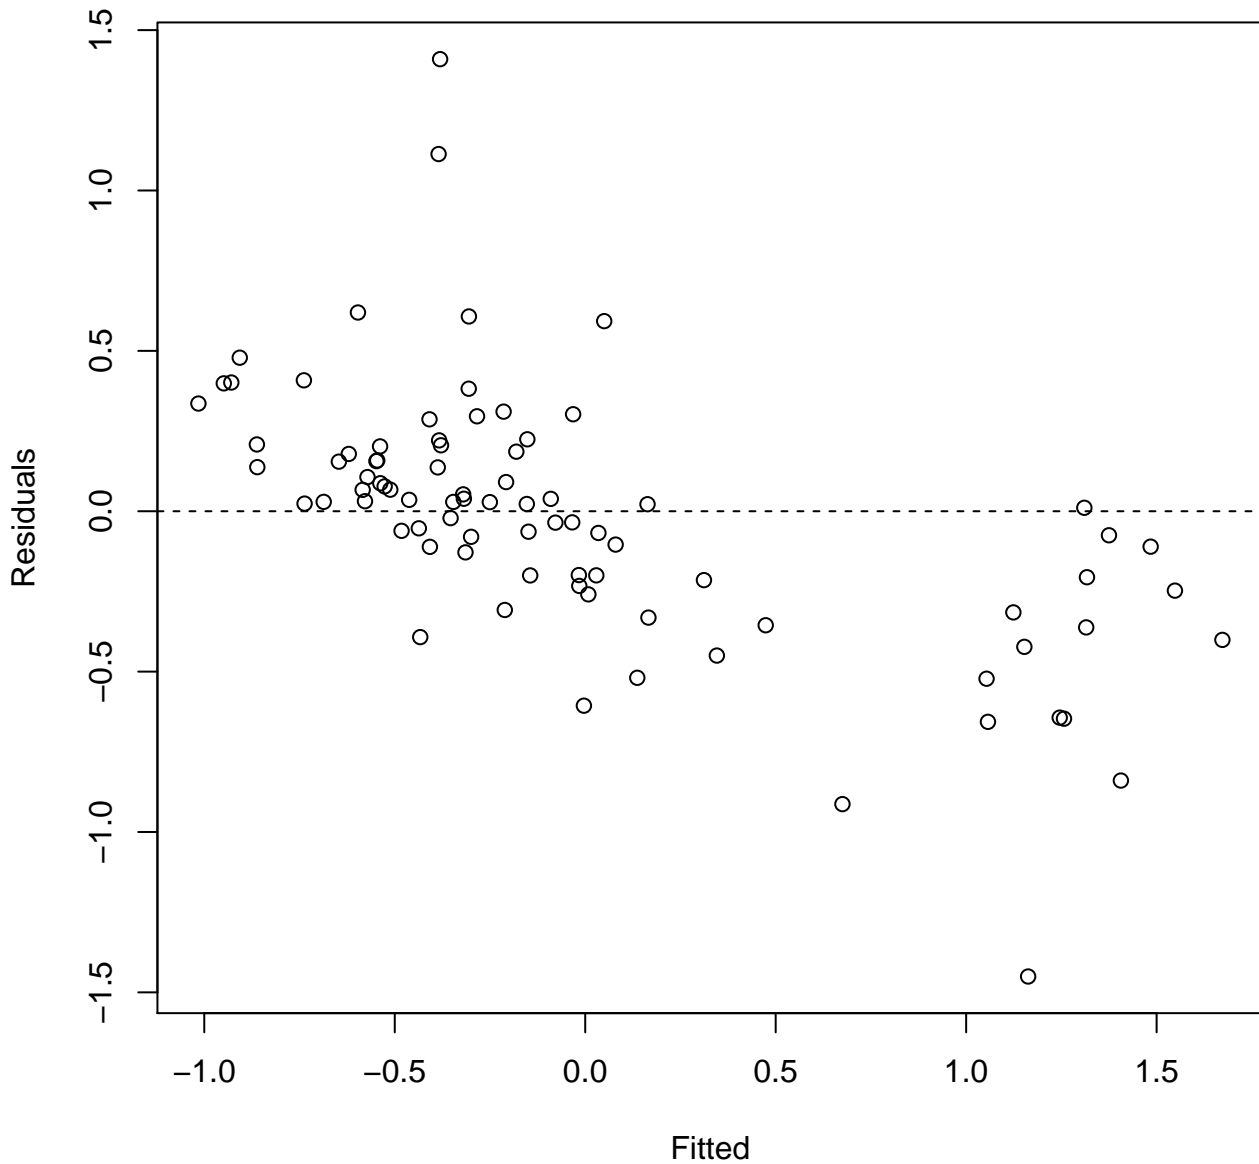

Supplement: rawData.zip [file rawData.zip]
