# Supplementary material for: A methodology for the design of experiments in computational intelligence with multiple regression models
Source: PeerJ journal article supplement (doi:10.7717/peerj.2721), 2016-12-01

**Train Yobs-Ypred**

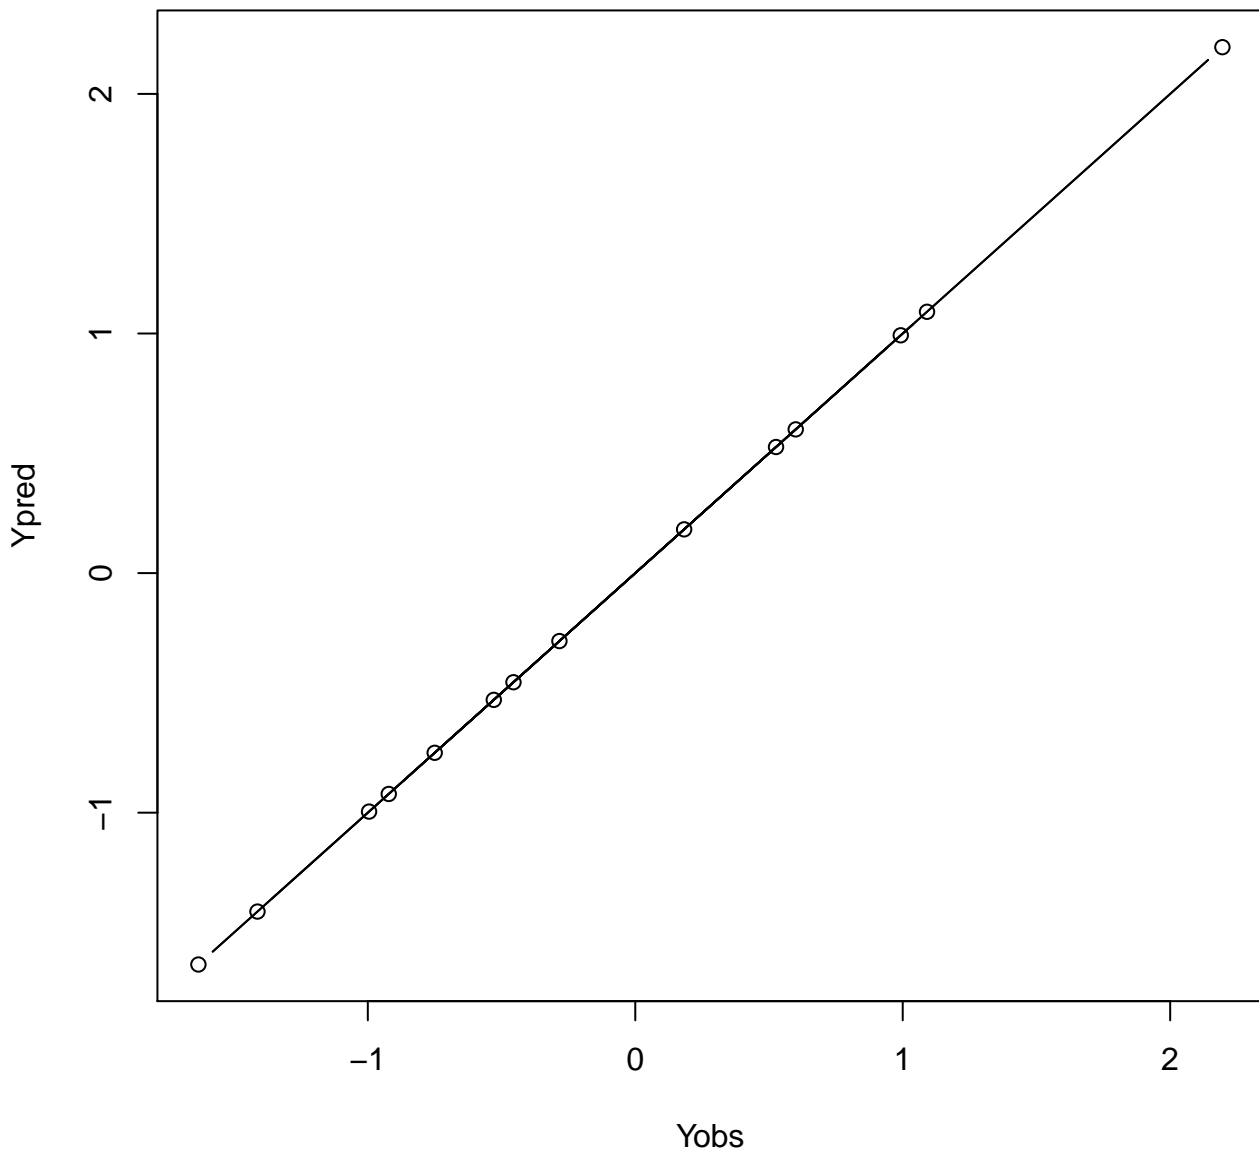

**Test Yobs-Ypred**

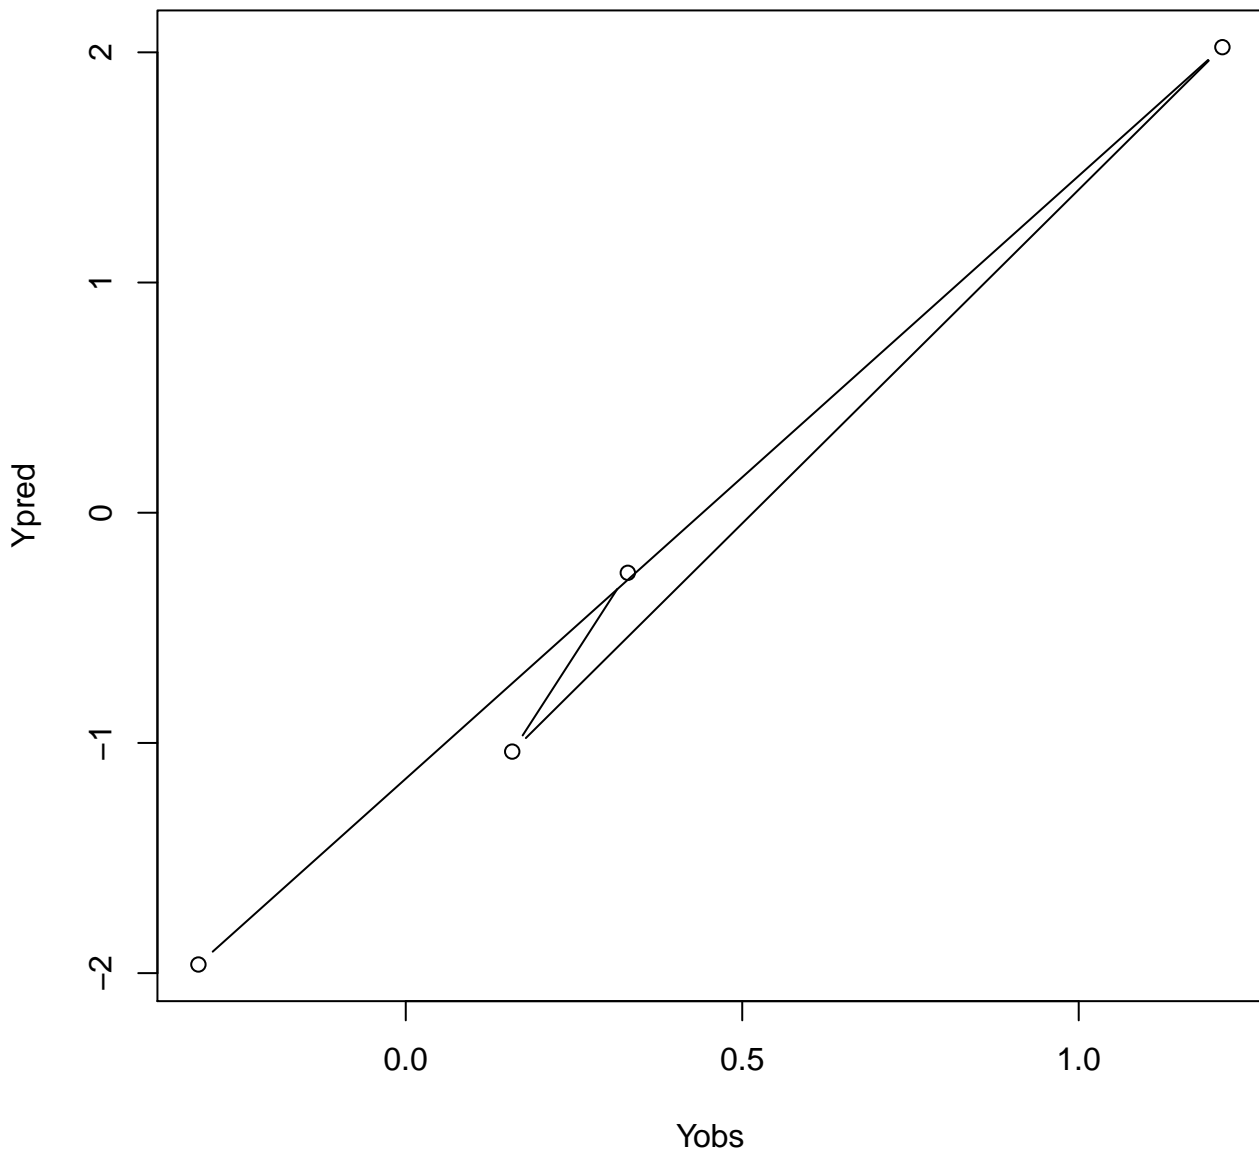

**Fitted vs. Residuals for Fitted Model**

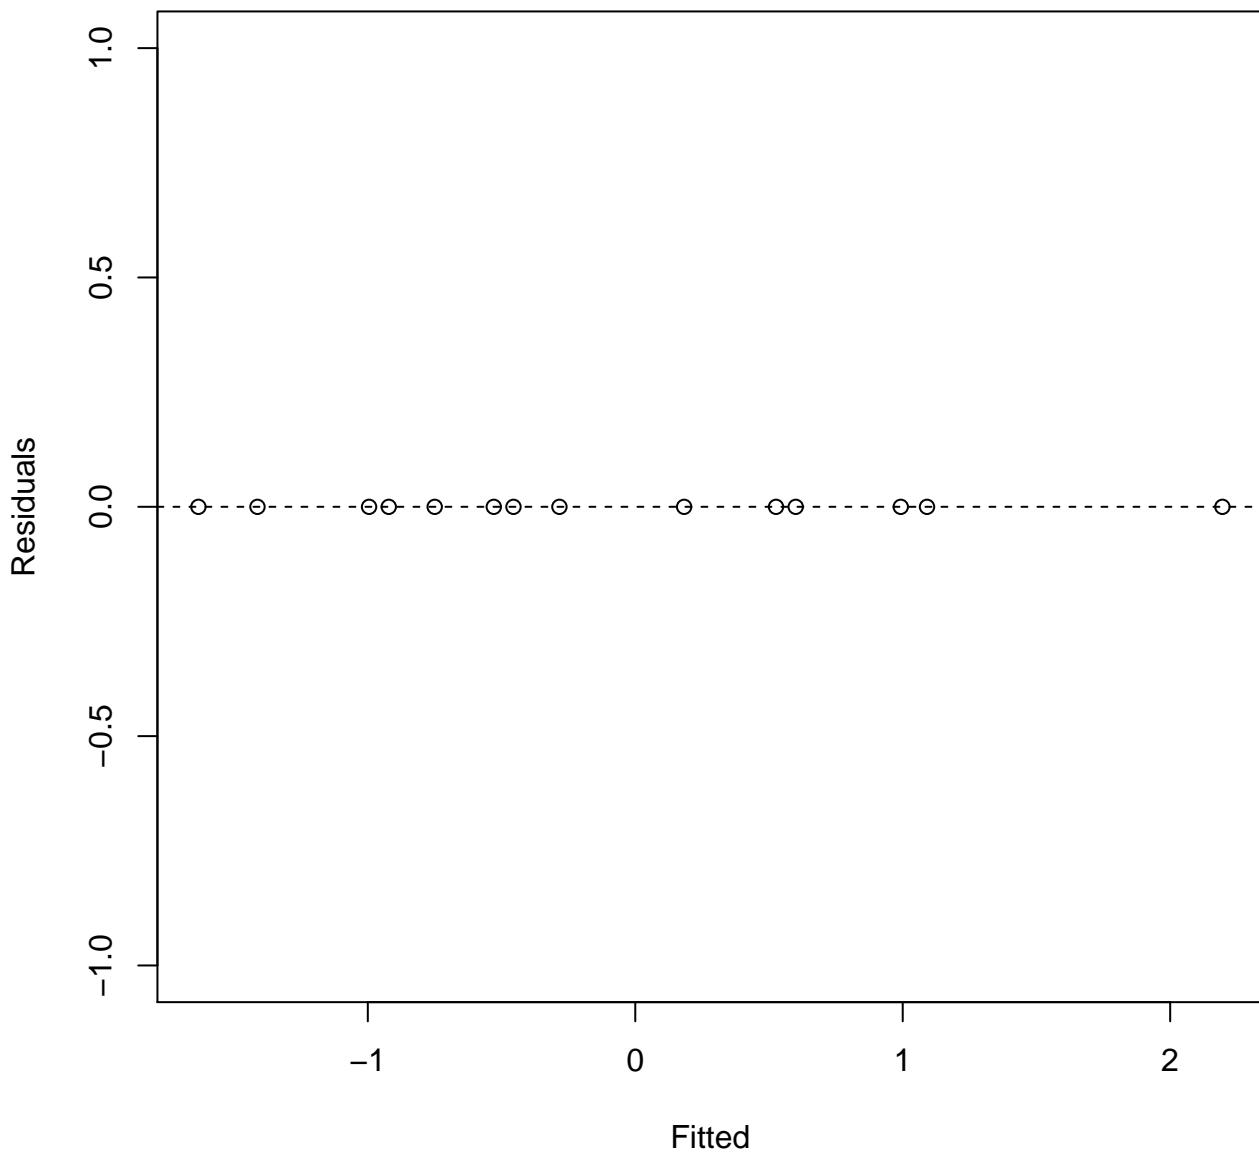

## Leverage for Fitted Model

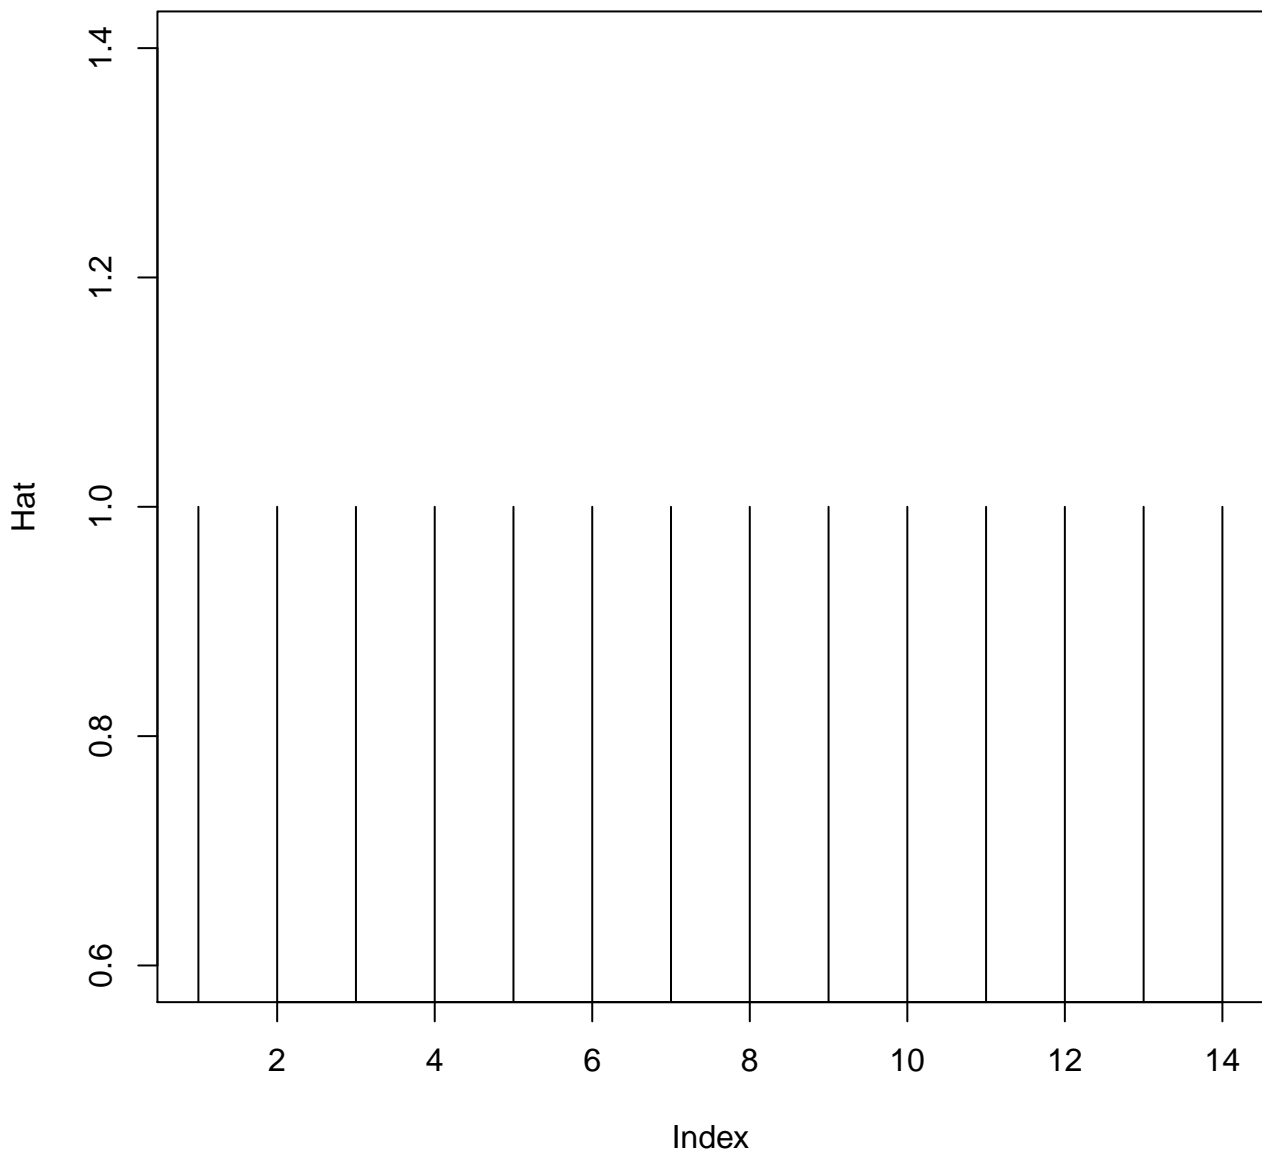

Supplement: rawData.zip [file rawData.zip]
