# Supplementary material for: A methodology for the design of experiments in computational intelligence with multiple regression models
Source: PeerJ journal article supplement (doi:10.7717/peerj.2721), 2016-12-01

**Train Yobs-Ypred**

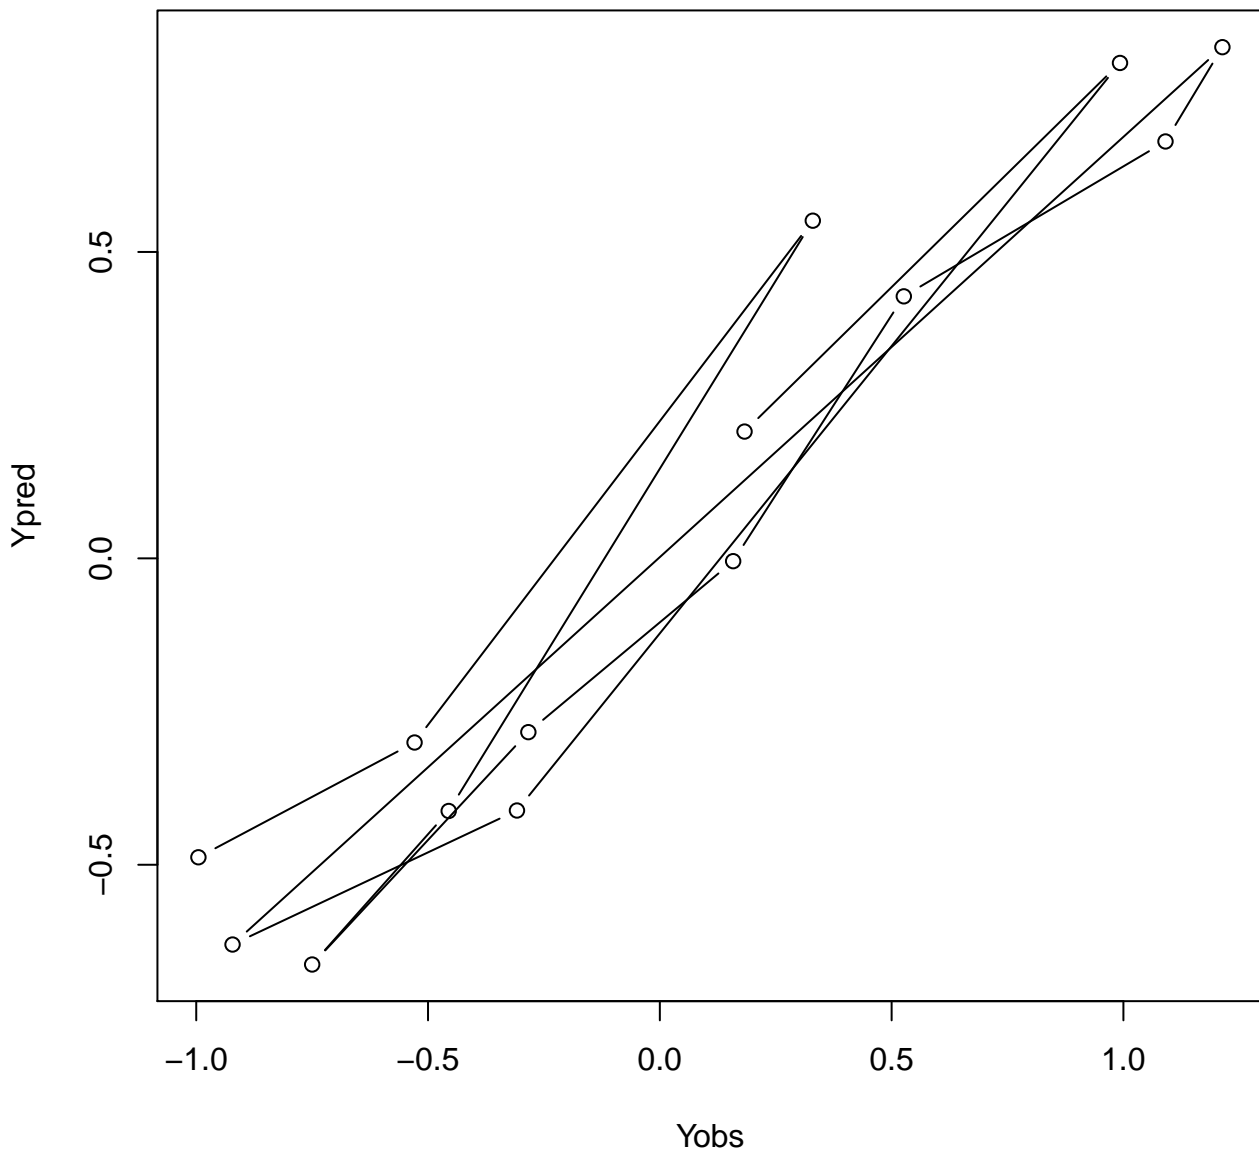

Test Yobs-Ypred

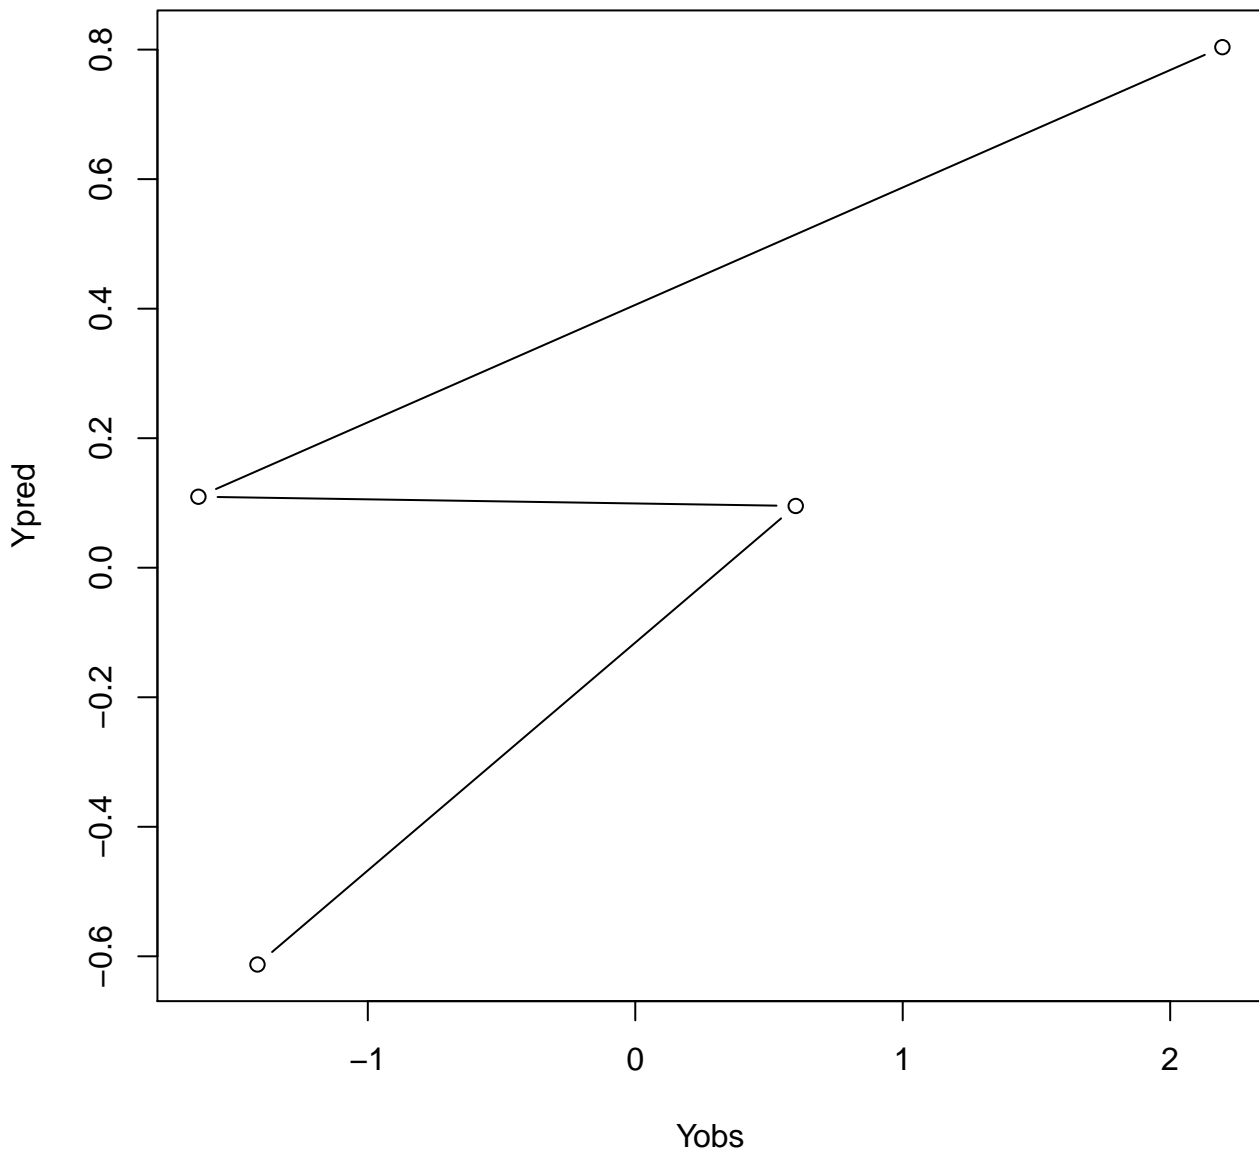

# Feature Importance

1

V31  
V30  
V22  
V24  
V21  
V27  
V29  
V28  
V23  
V33  
V6  
V25  
V18  
V11  
V20  
V19  
V10  
V9  
V16  
V14  
V2  
V26  
V5  
V7  
V3  
V4  
V32  
V13  
V8  
V15  
V17  
V12

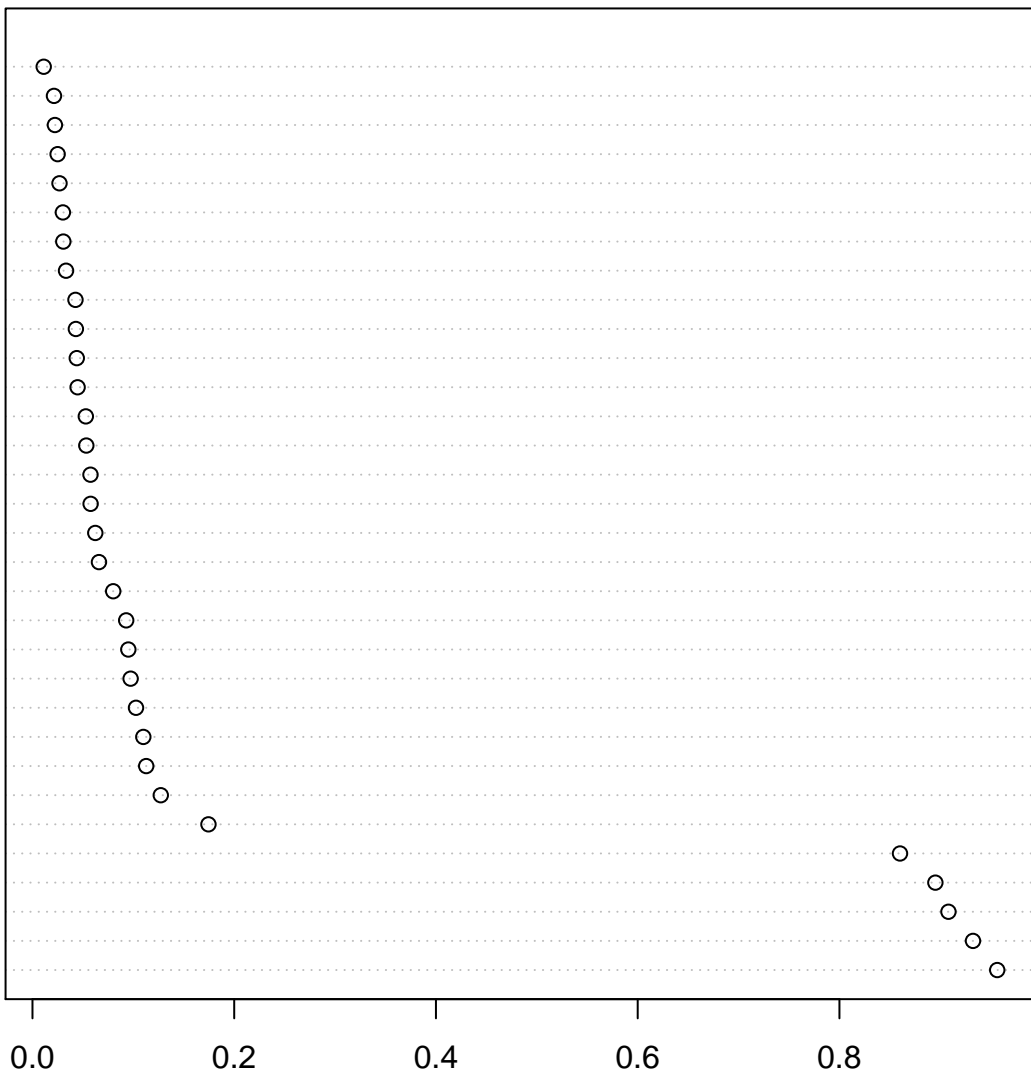

**Fitted vs. Residuals for Fitted Model**

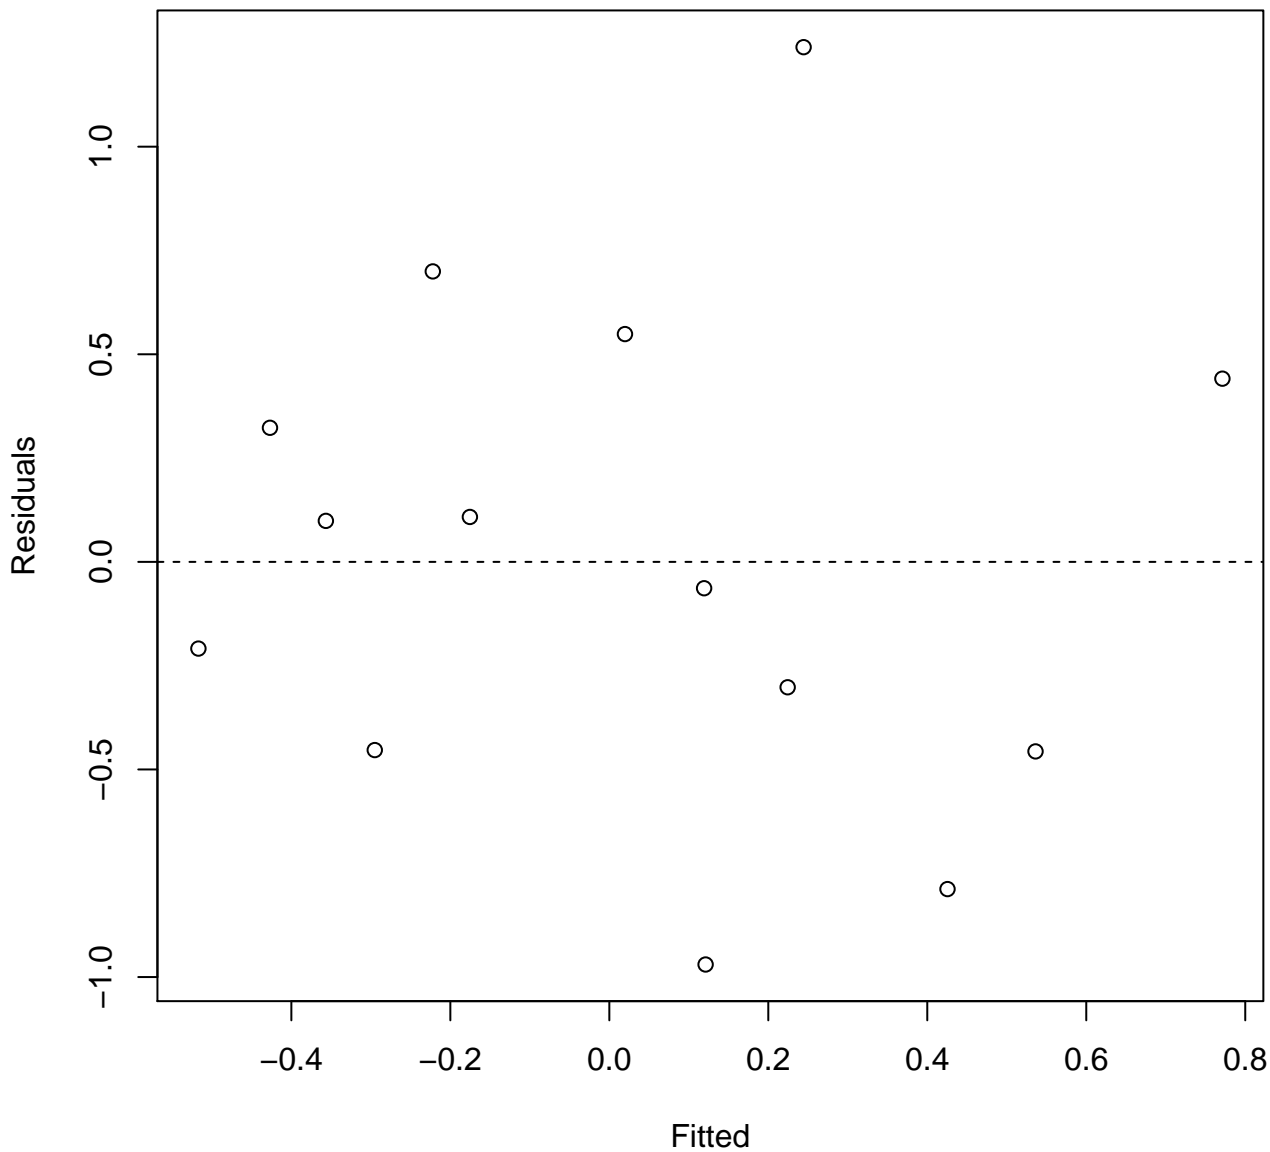

Supplement: rawData.zip [file rawData.zip]
