# Supplementary material for: A methodology for the design of experiments in computational intelligence with multiple regression models
Source: PeerJ journal article supplement (doi:10.7717/peerj.2721), 2016-12-01

**Train Yobs-Ypred**

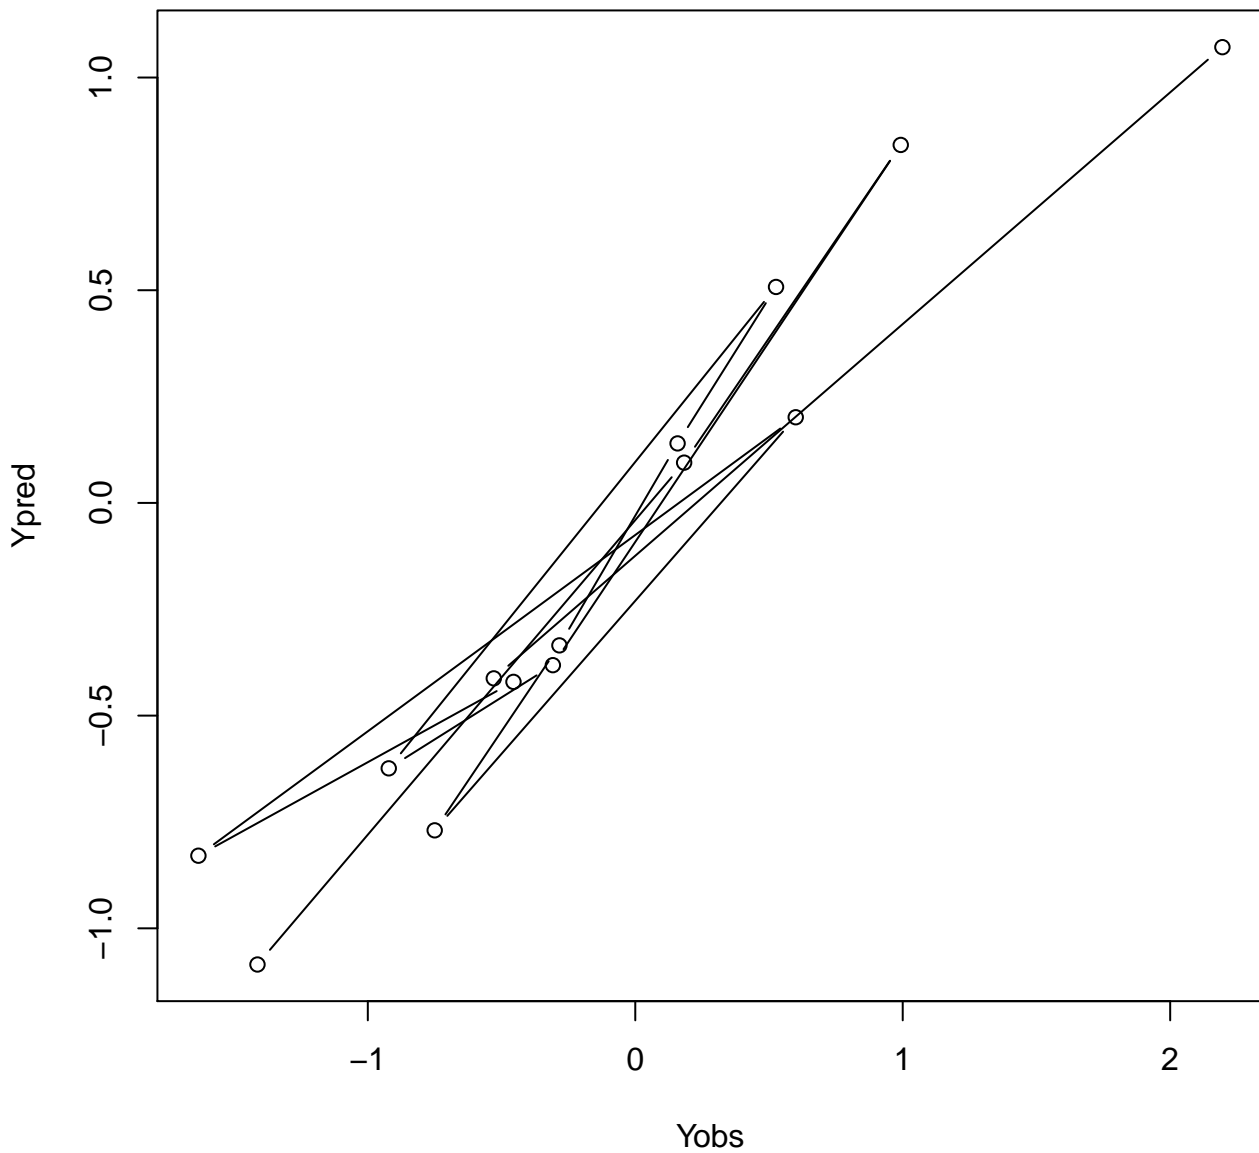

**Test Yobs-Ypred**

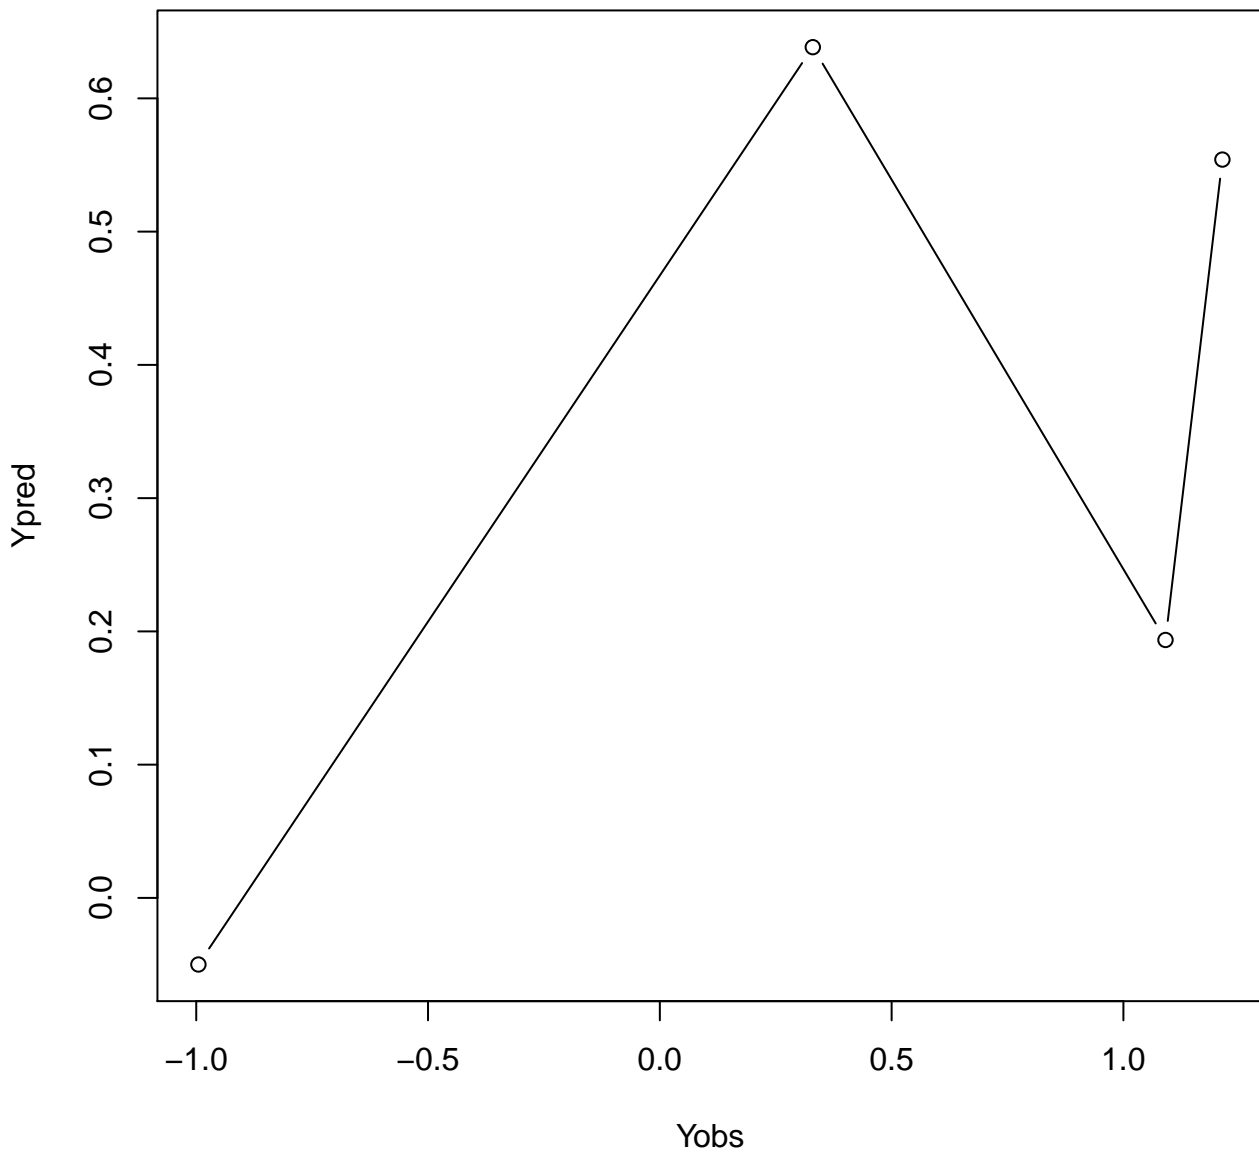

# Feature Importance

1

V20  
V22  
V30  
V25  
V27  
V33  
V16  
V29  
V24  
V9  
V10  
V11  
V23  
V28  
V19  
V18  
V21  
V31  
V6  
V14  
V7  
V26  
V5  
V2  
V4  
V3  
V12  
V8  
V13  
V15  
V17  
V32

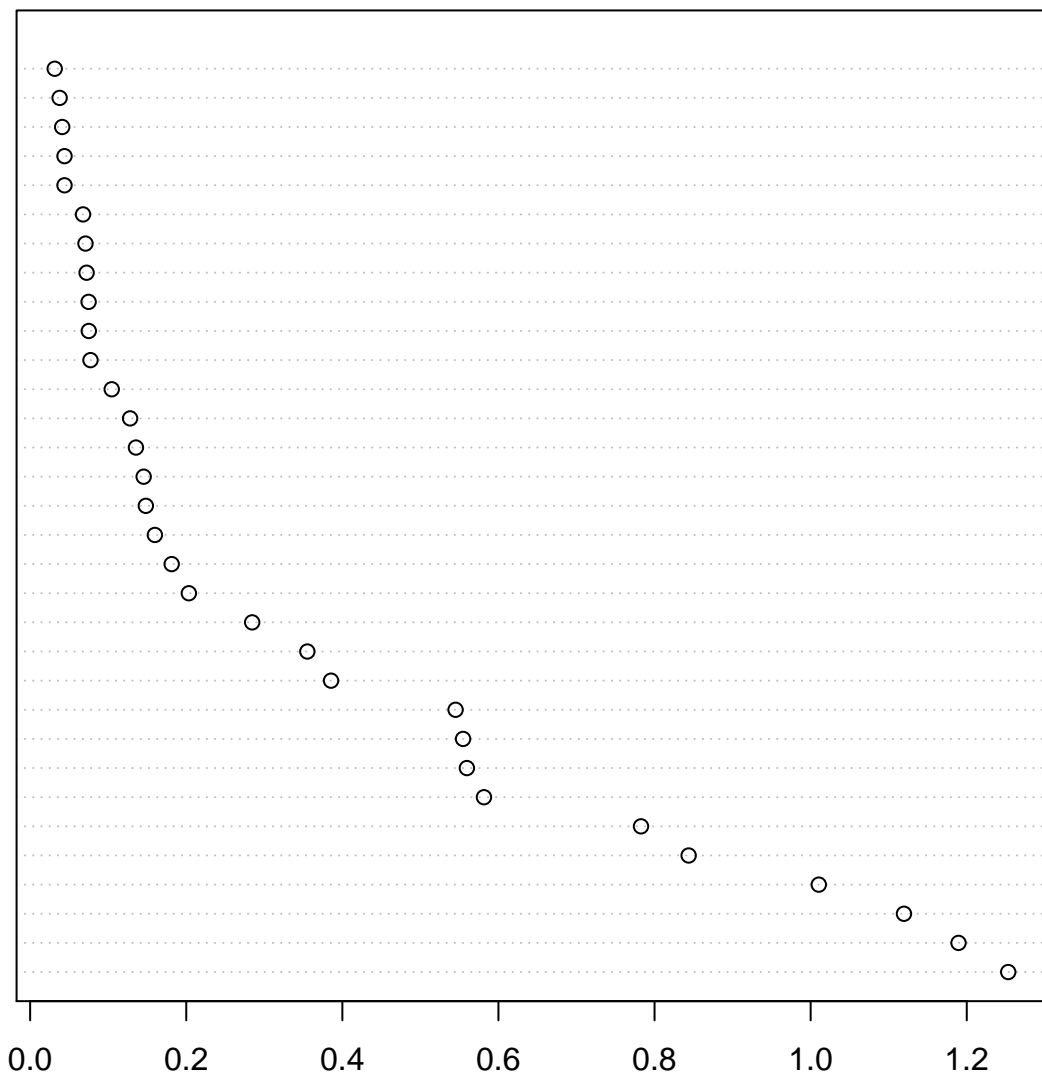

**Fitted vs. Residuals for Fitted Model**

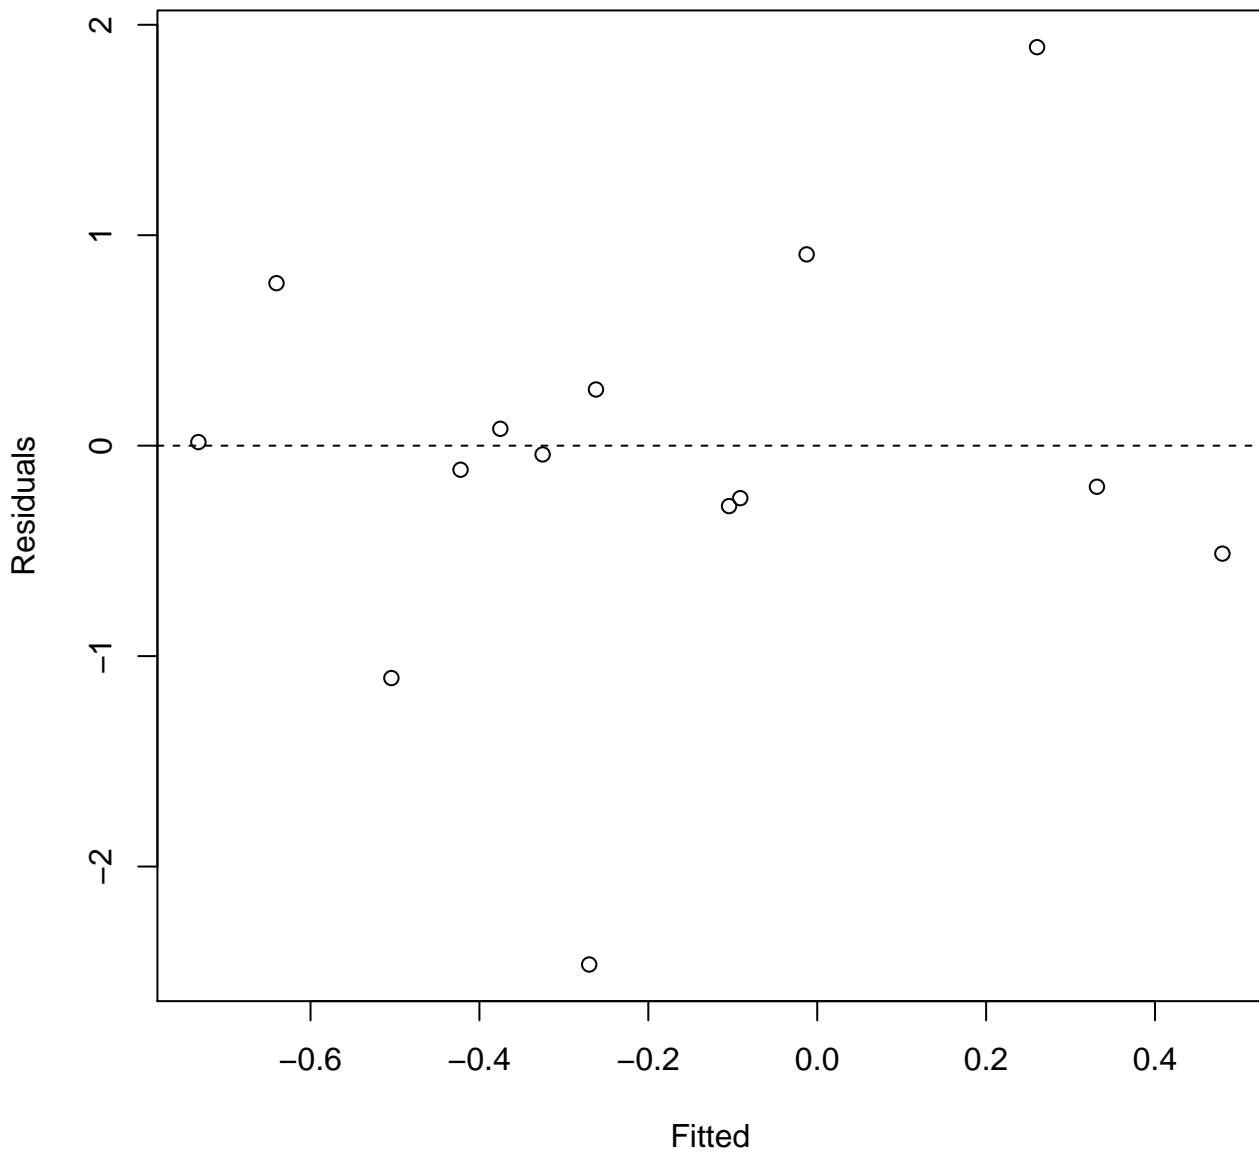

Supplement: rawData.zip [file rawData.zip]
