# Supplementary material for: A methodology for the design of experiments in computational intelligence with multiple regression models
Source: PeerJ journal article supplement (doi:10.7717/peerj.2721), 2016-12-01

**Train Yobs-Ypred**

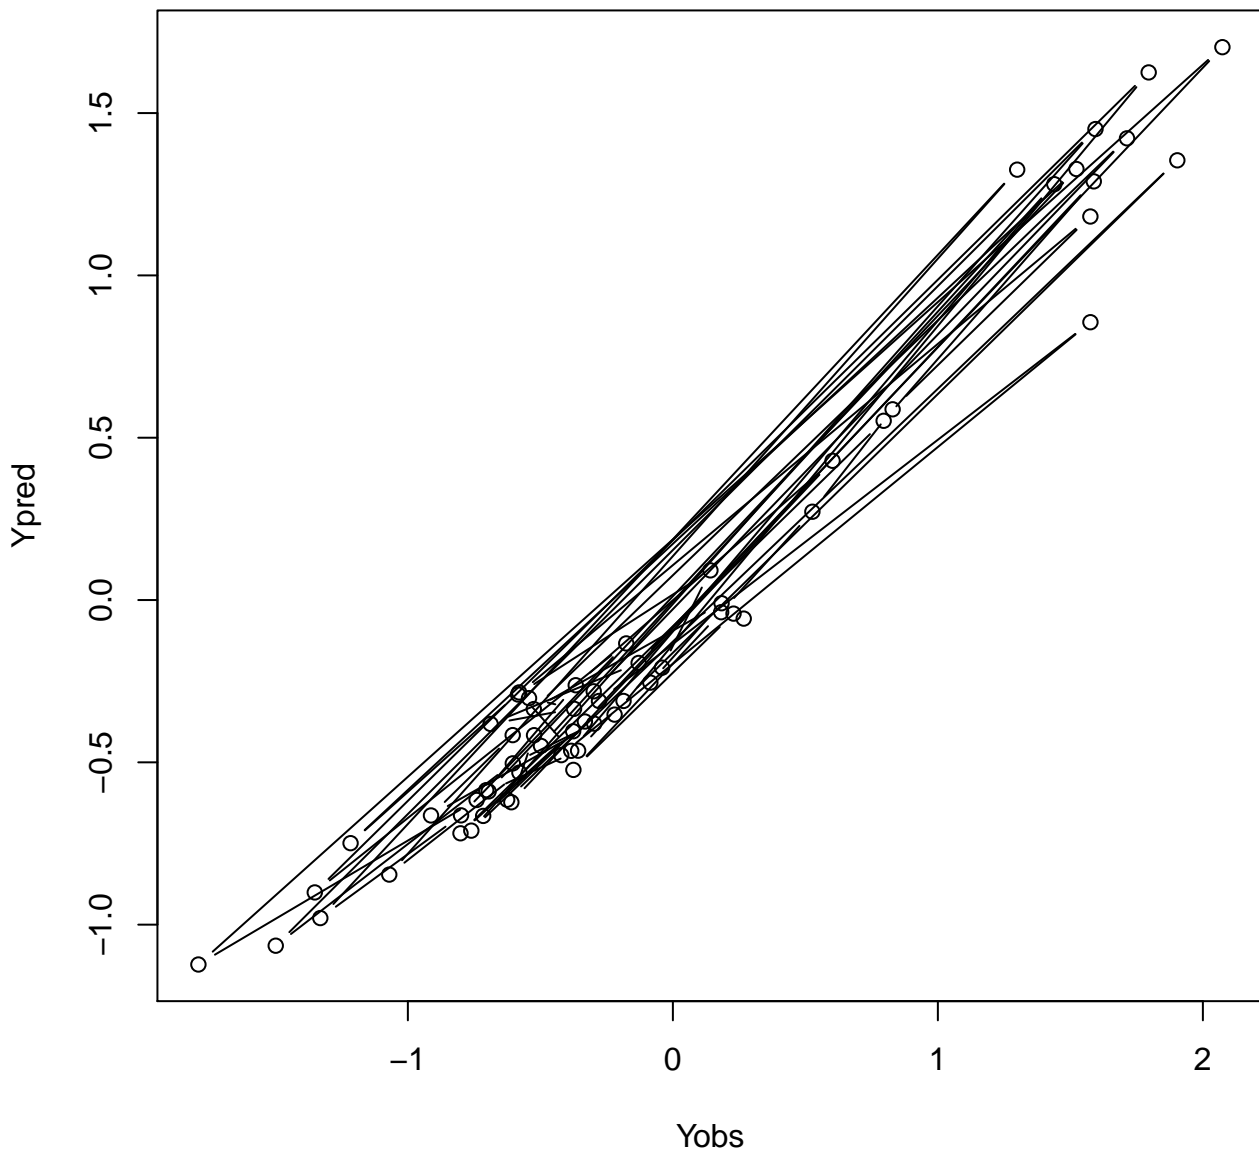

**Test Yobs-Ypred**

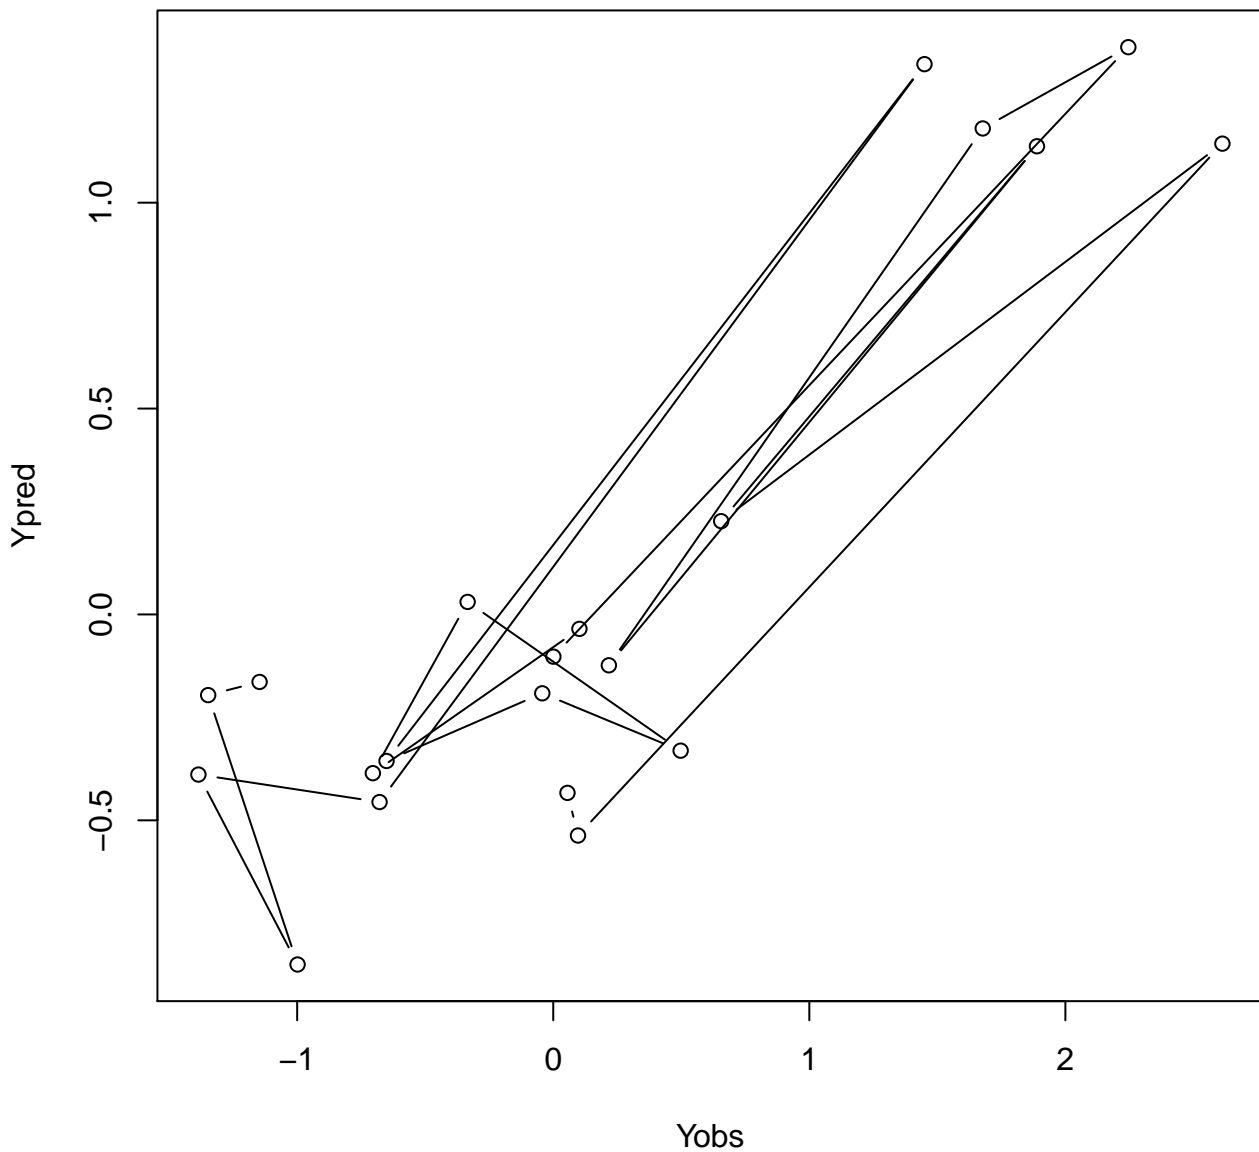

# Feature Importance

V92  
V9  
V3  
V28  
V45  
V25  
V24  
V42  
V11  
V7  
V78  
V35  
V12  
V26  
V56  
V15  
V40  
V6  
V29  
V16  
V68  
V82  
V17  
V8  
V19  
V93  
V108  
V2  
V38  
V23  
V75  
V14

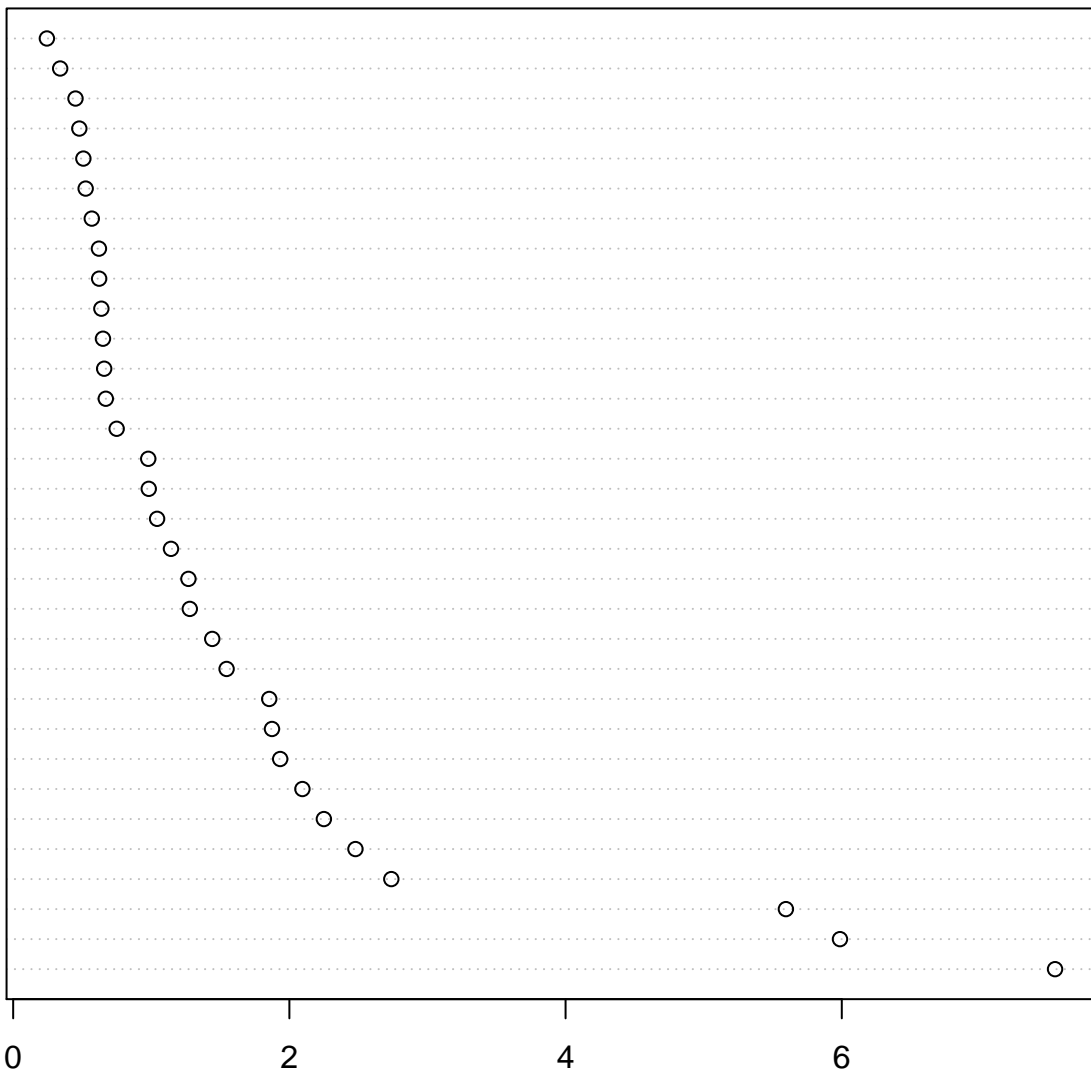

**Fitted vs. Residuals for Fitted Model**

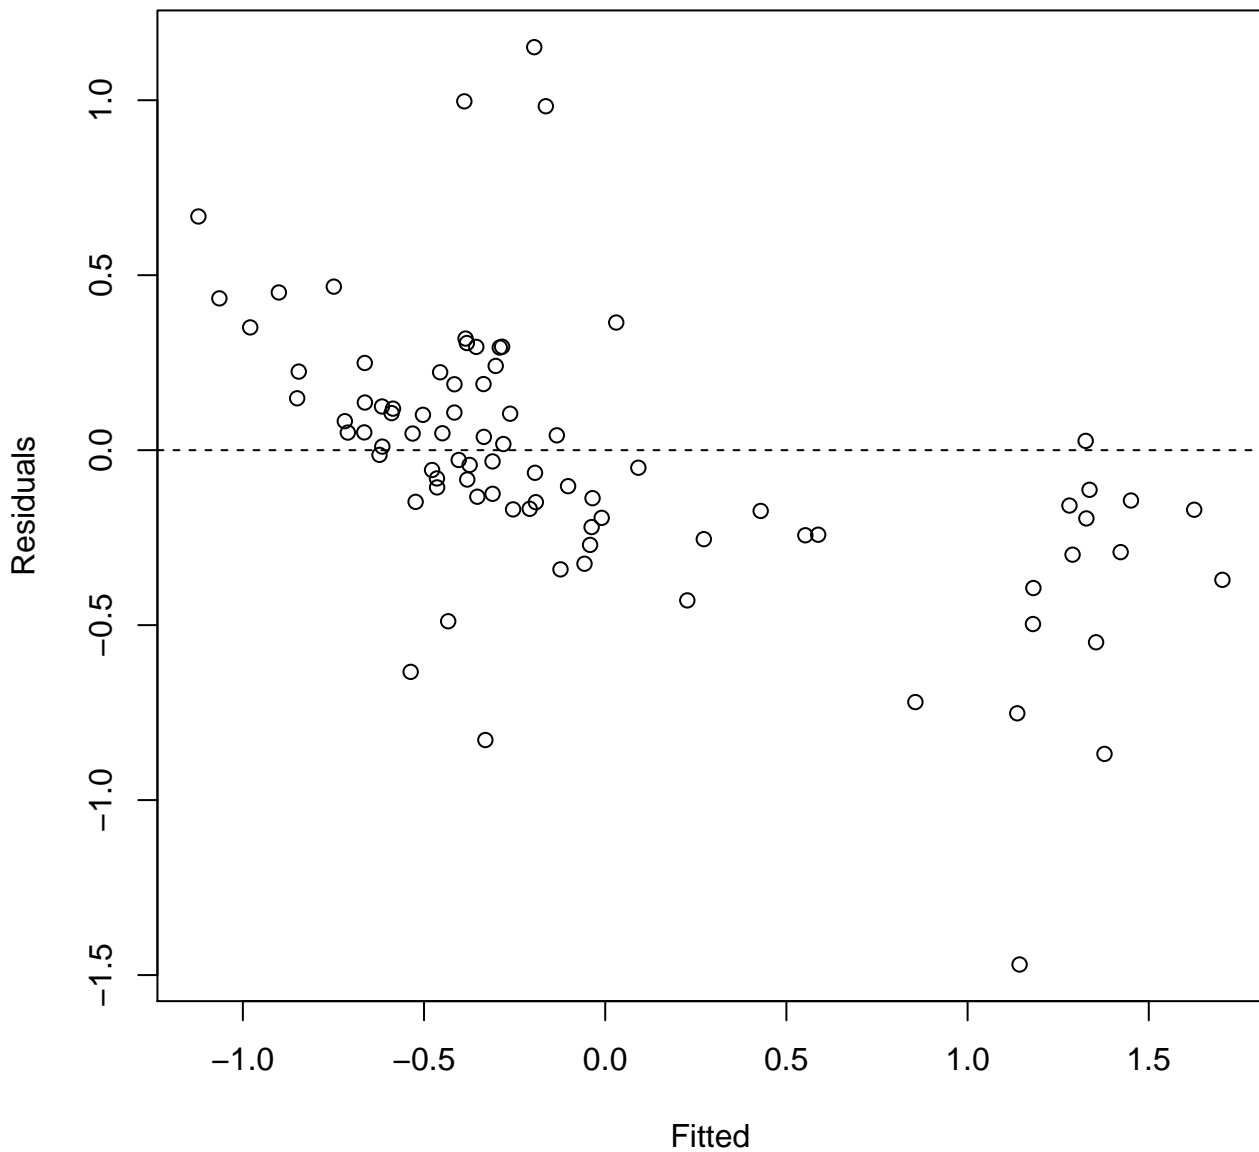

Supplement: rawData.zip [file rawData.zip]
