# Supplementary material for: A methodology for the design of experiments in computational intelligence with multiple regression models
Source: PeerJ journal article supplement (doi:10.7717/peerj.2721), 2016-12-01

Train Yobs-Ypred

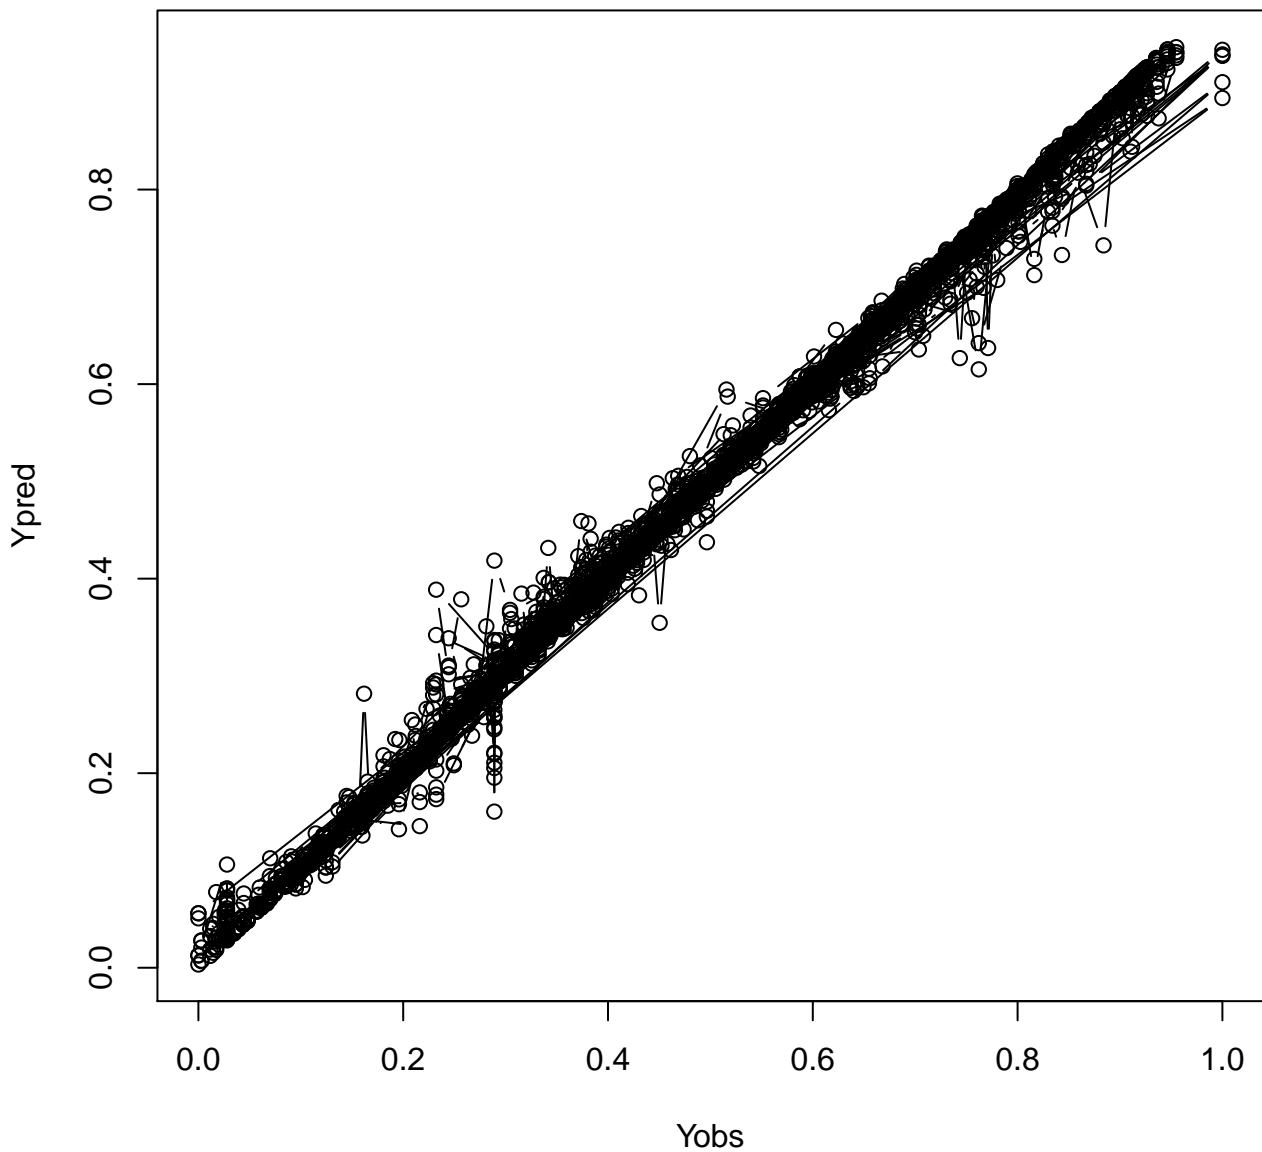

**Test Yobs-Ypred**

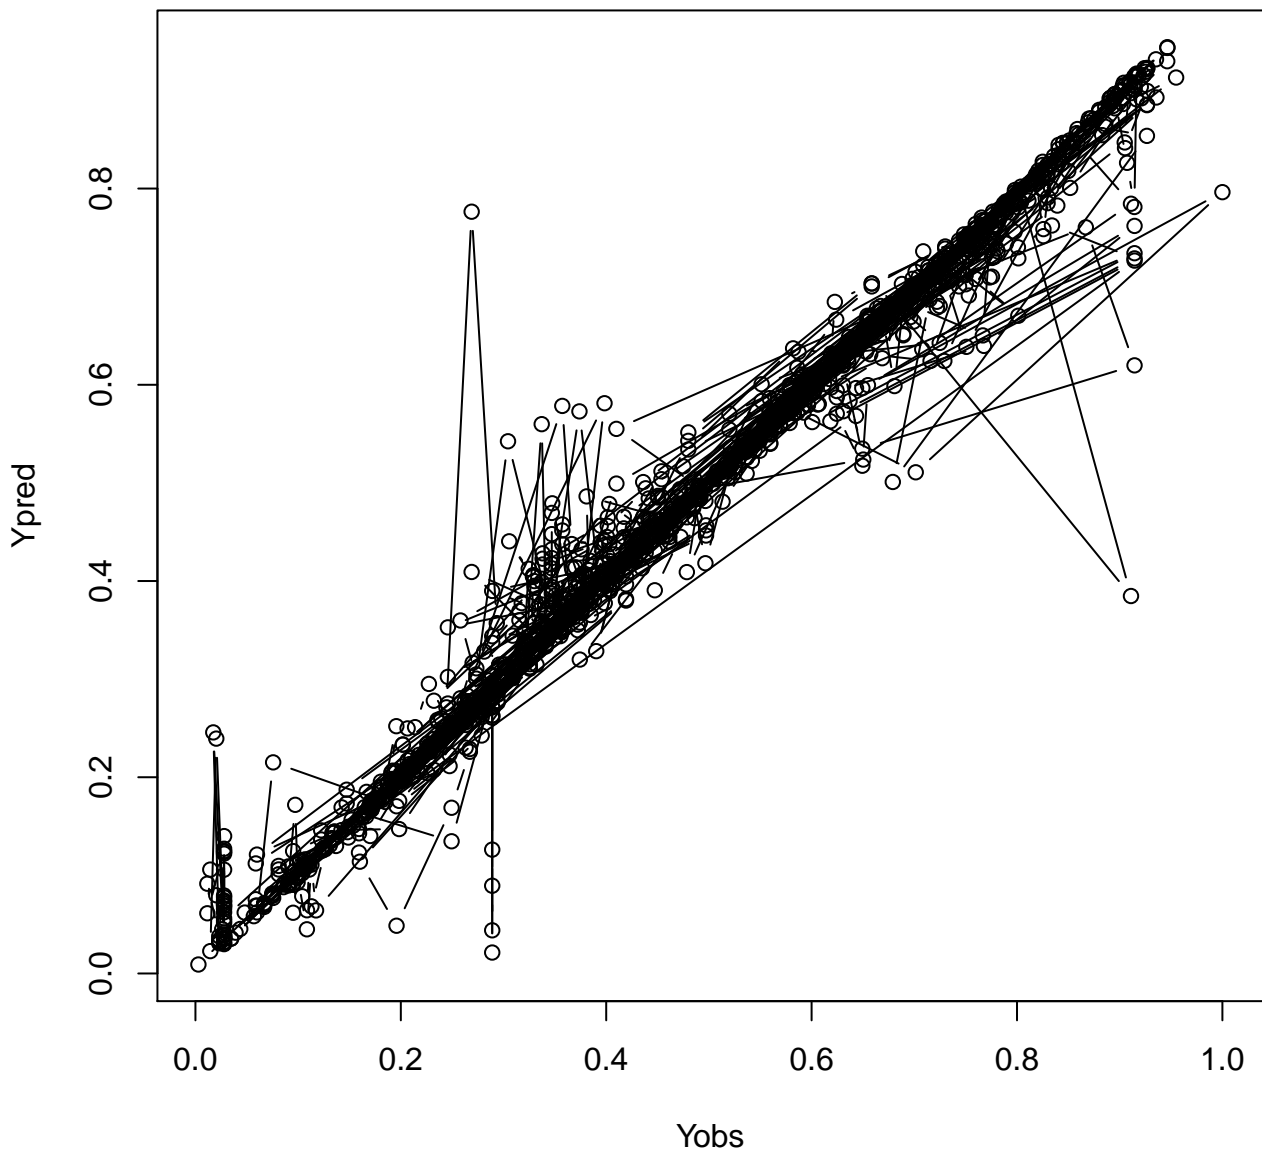

# Feature Importance

1

V14

V20

V16

V7

V18

V15

V17

V6

V19

V4

V3

V2

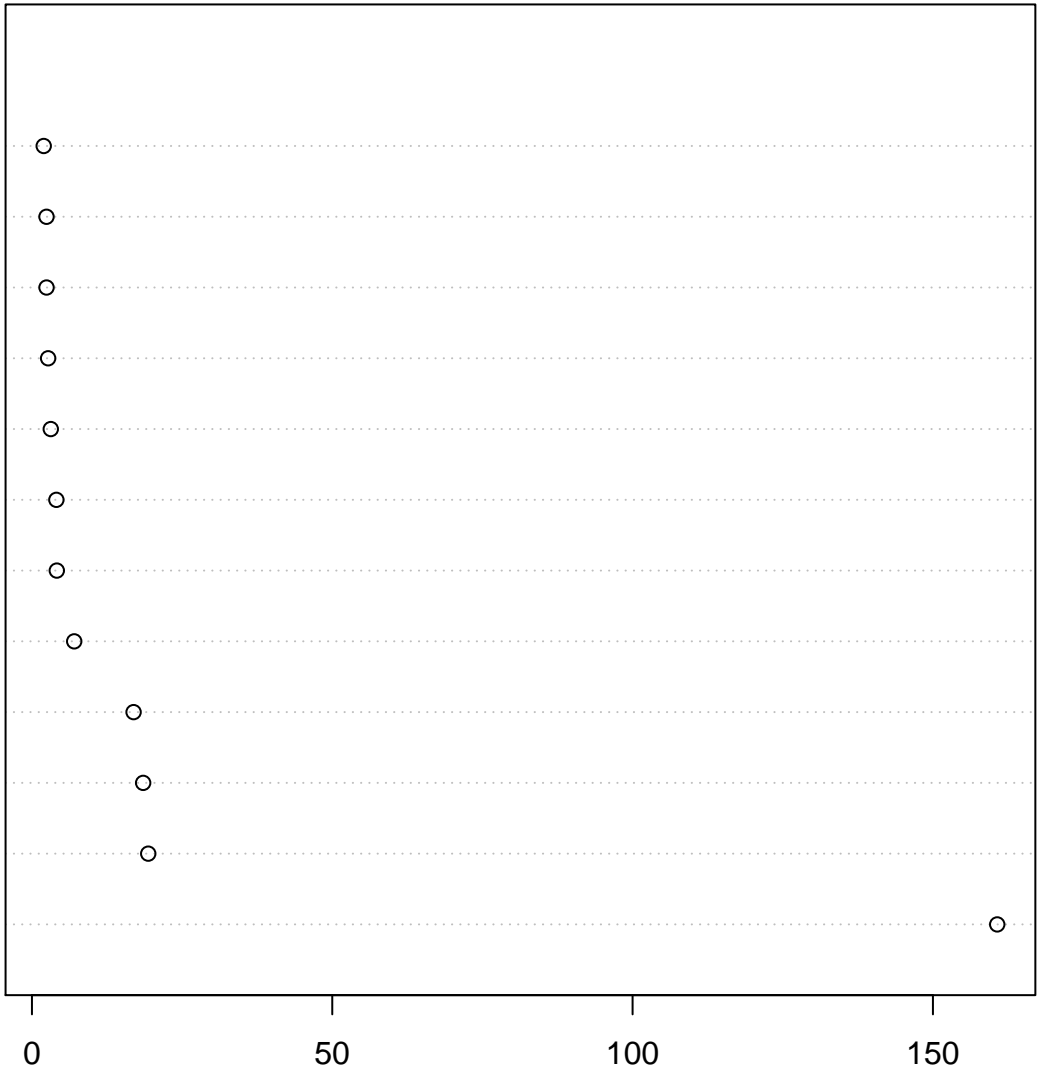

**Fitted vs. Residuals for Fitted Model**

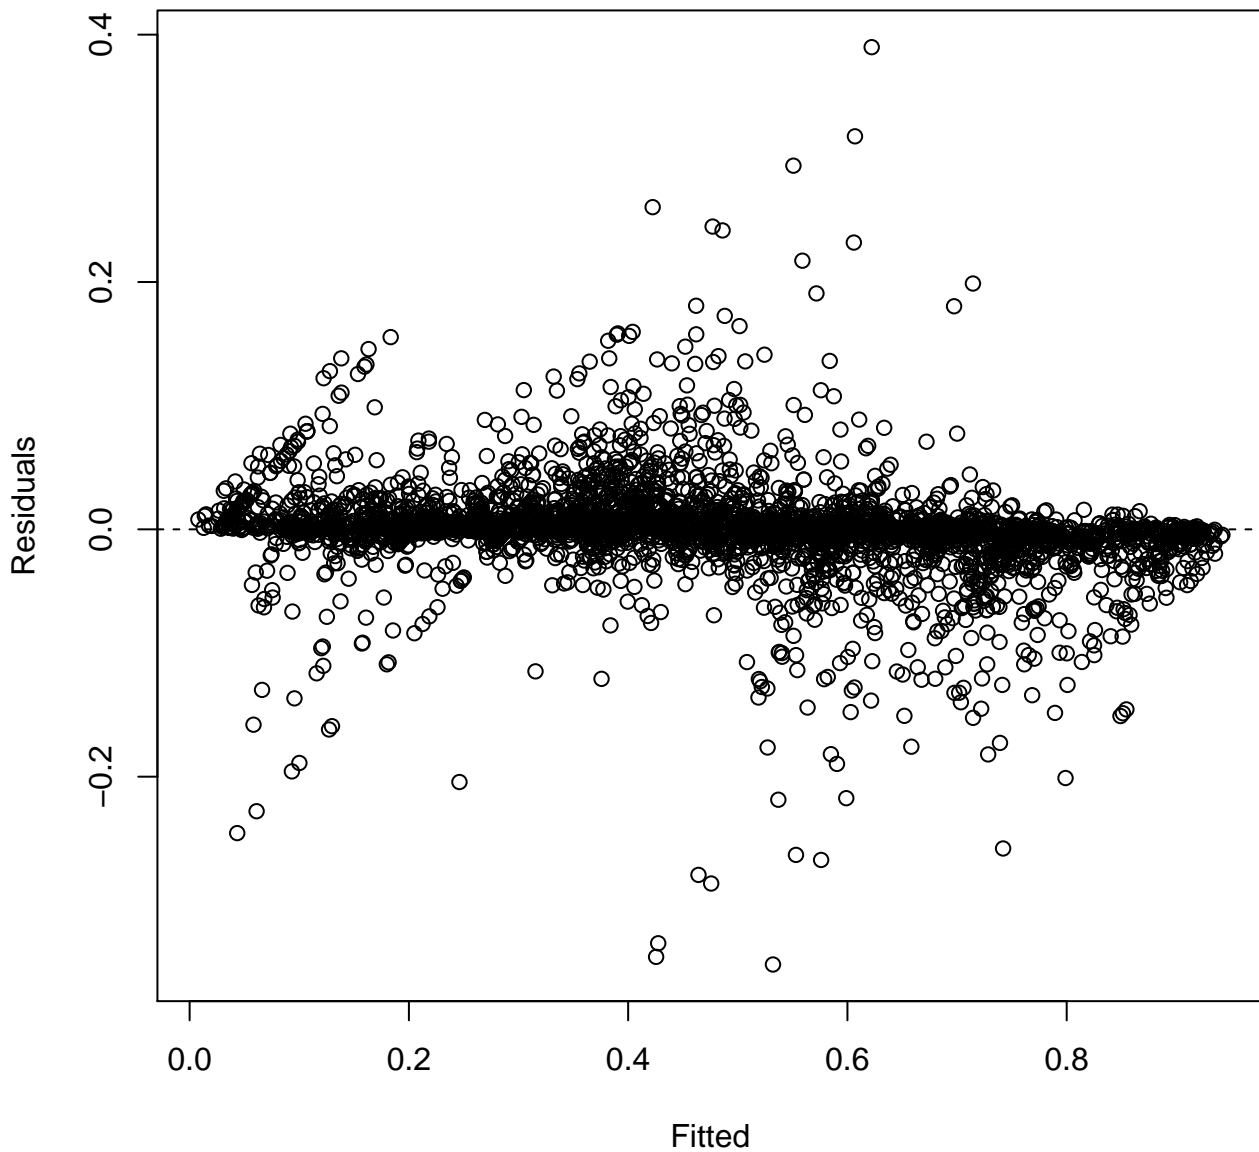

# Leverage for Fitted Model

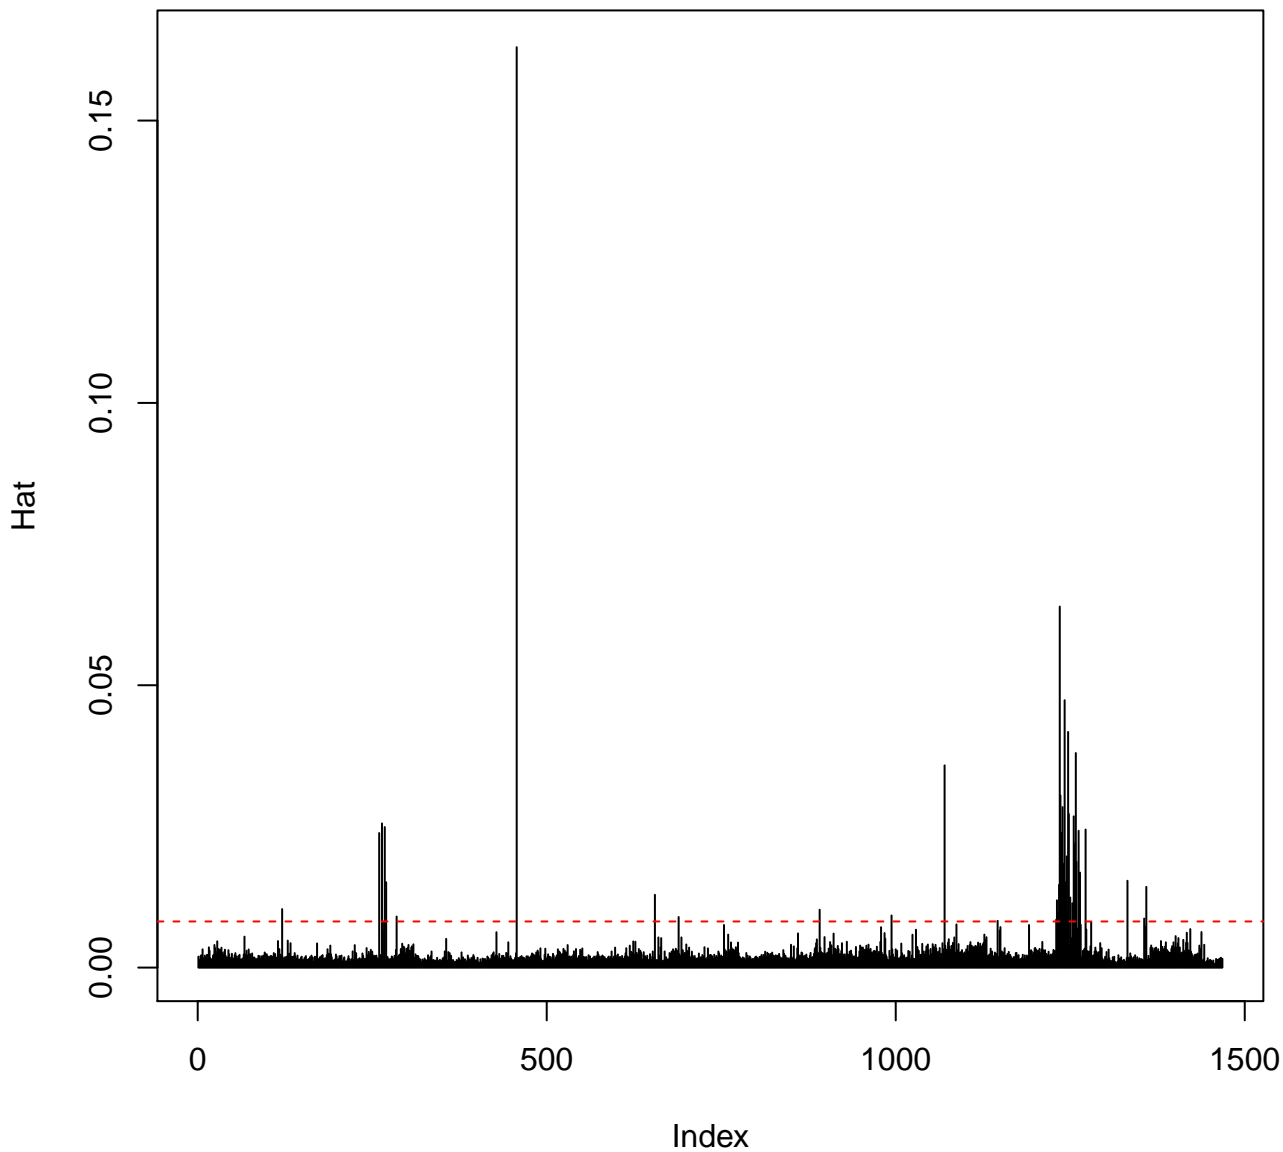

Supplement: rawData.zip [file rawData.zip]
