# Supplementary material for: A methodology for the design of experiments in computational intelligence with multiple regression models
Source: PeerJ journal article supplement (doi:10.7717/peerj.2721), 2016-12-01

Train Yobs-Ypred

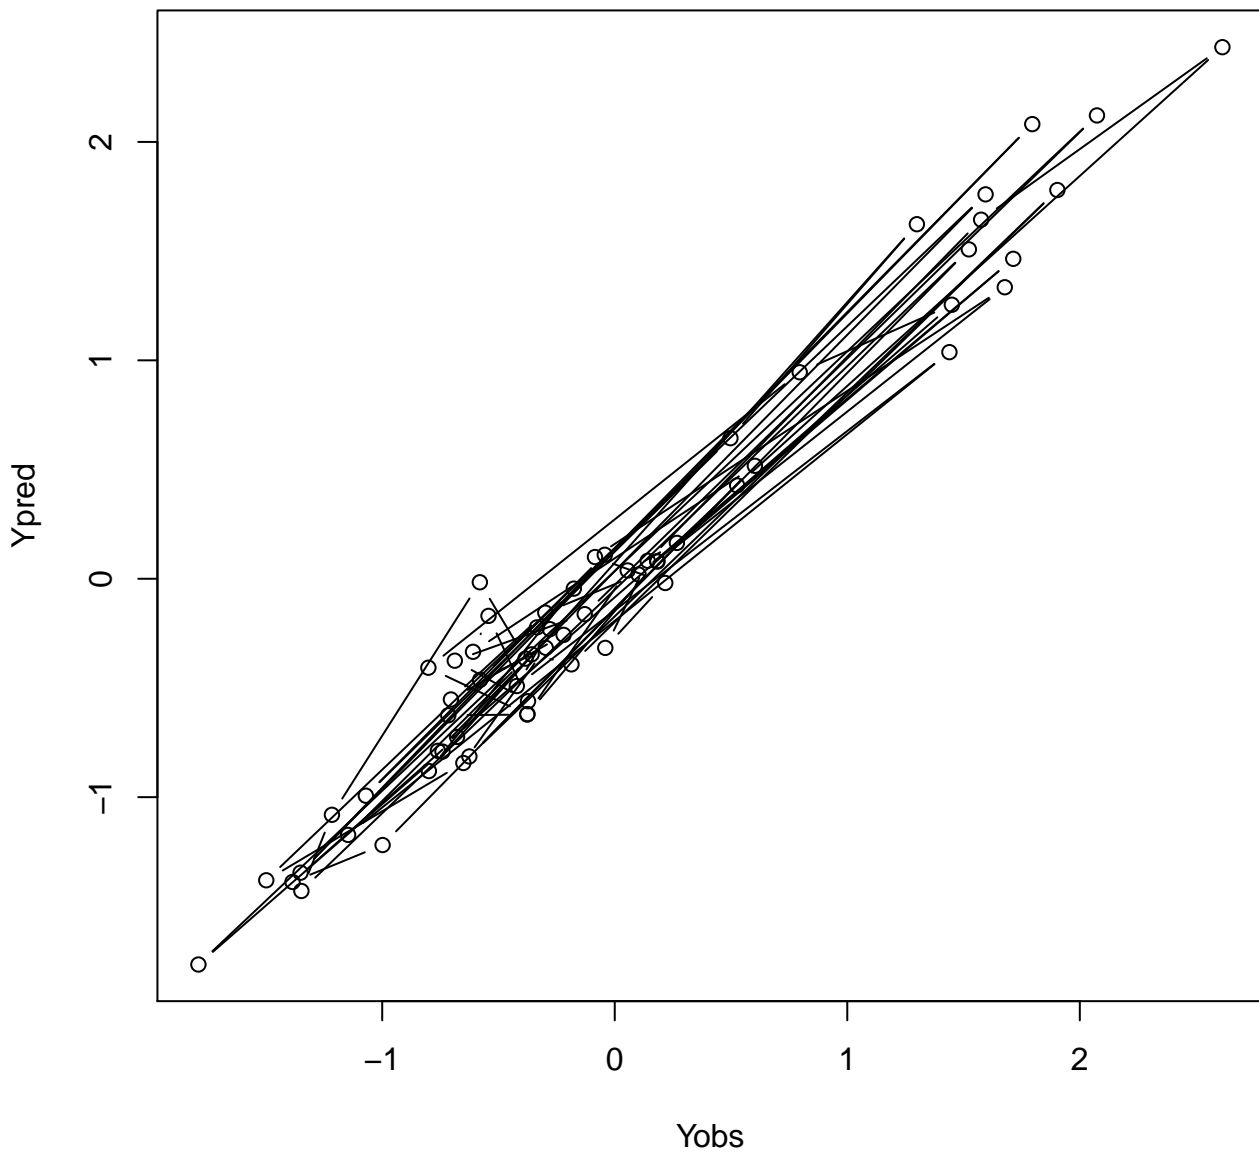

**Test Yobs-Ypred**

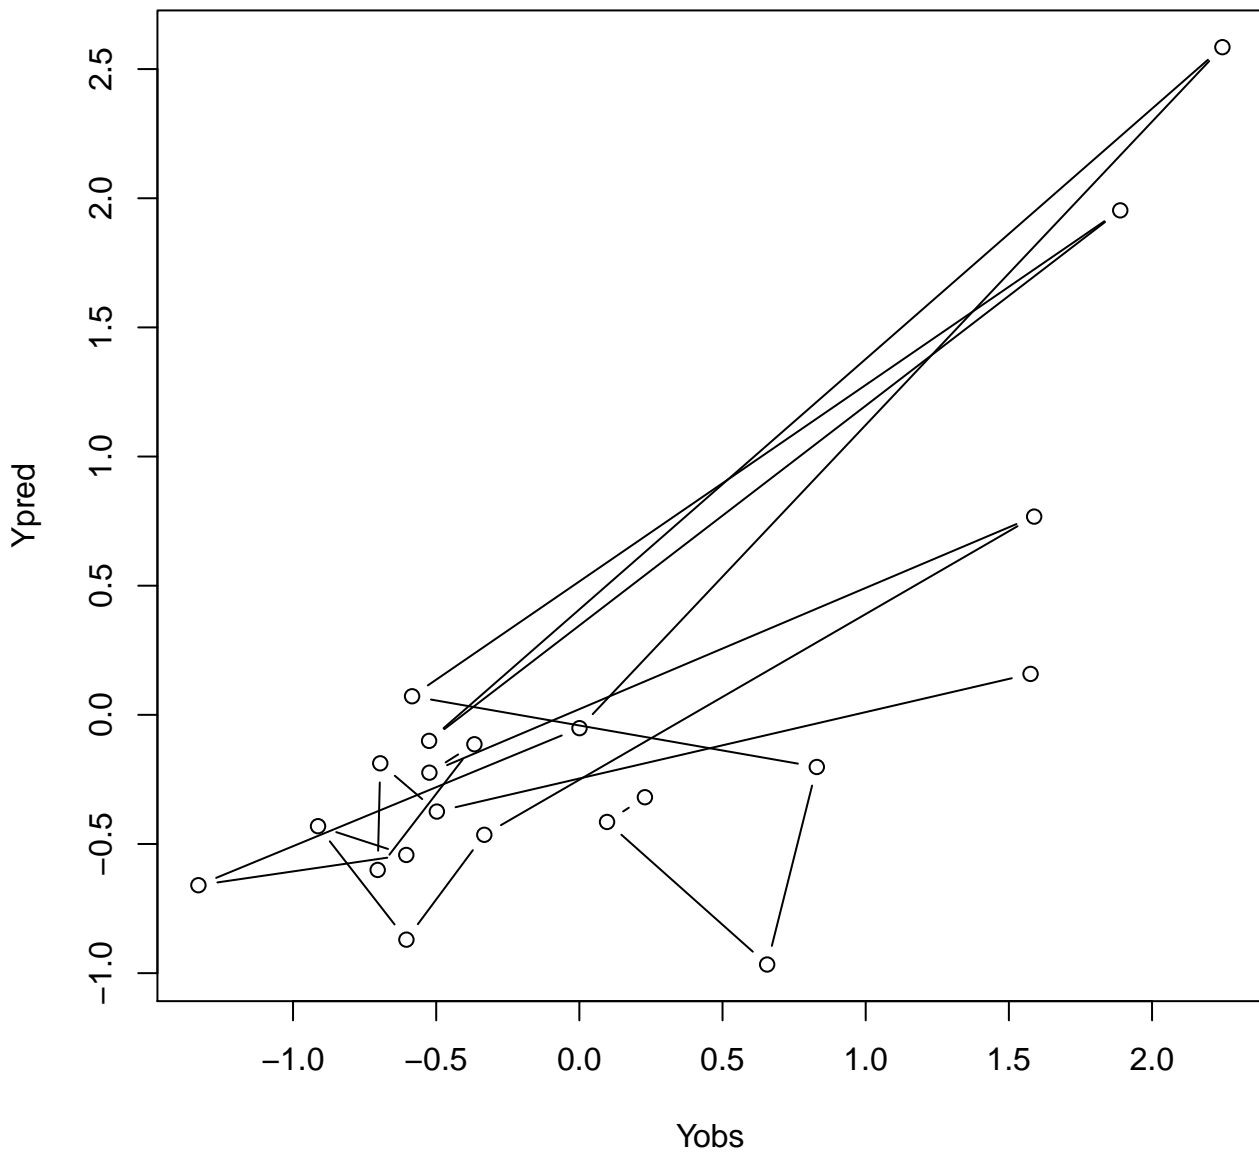

Feature Importance

Overall  
C1  
C2  
C3  
C4  
C5  
C6  
C7  
C8  
C9  
C10  
C11  
C12  
C13  
C14  
C15  
C16  
C17  
C18  
C19  
C20  
C21  
C22  
C23  
C24  
C25  
C26  
C27  
C28  
C29  
C30  
C31  
C32  
C33  
C34  
C35  
C36  
C37  
C38  
C39  
C40  
C41  
C42  
C43  
C44  
C45  
C46  
C47  
C48  
C49  
C50  
C51  
C52  
C53  
C54  
C55  
C56  
C57  
C58  
C59  
C60  
C61  
C62  
C63  
C64  
C65  
C66  
C67  
C68  
C69  
C70  
C71  
C72  
C73  
C74  
C75  
C76  
C77  
C78  
C79  
C80  
C81  
C82  
C83  
C84  
C85  
C86  
C87  
C88  
C89  
C90  
C91  
C92  
C93  
C94  
C95  
C96  
C97  
C98  
C99  
C100

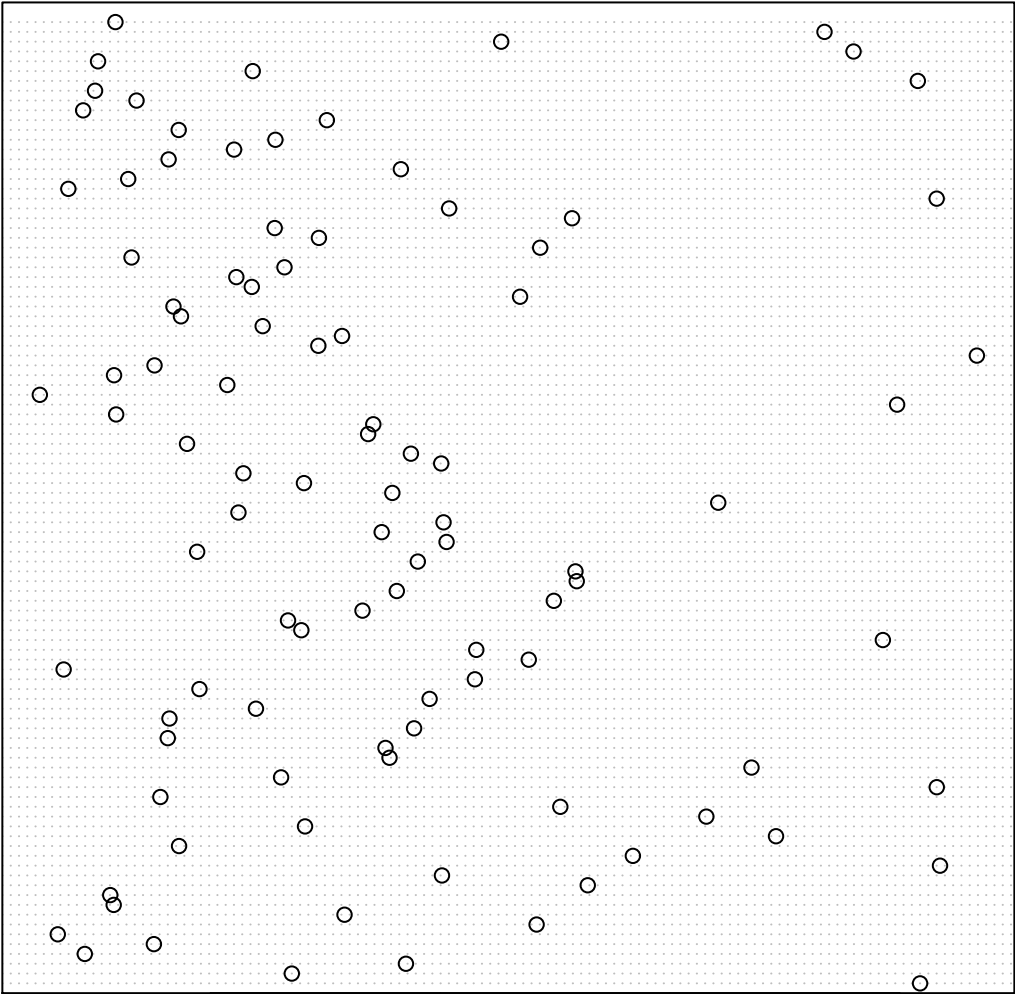

**Fitted vs. Residuals for Fitted Model**

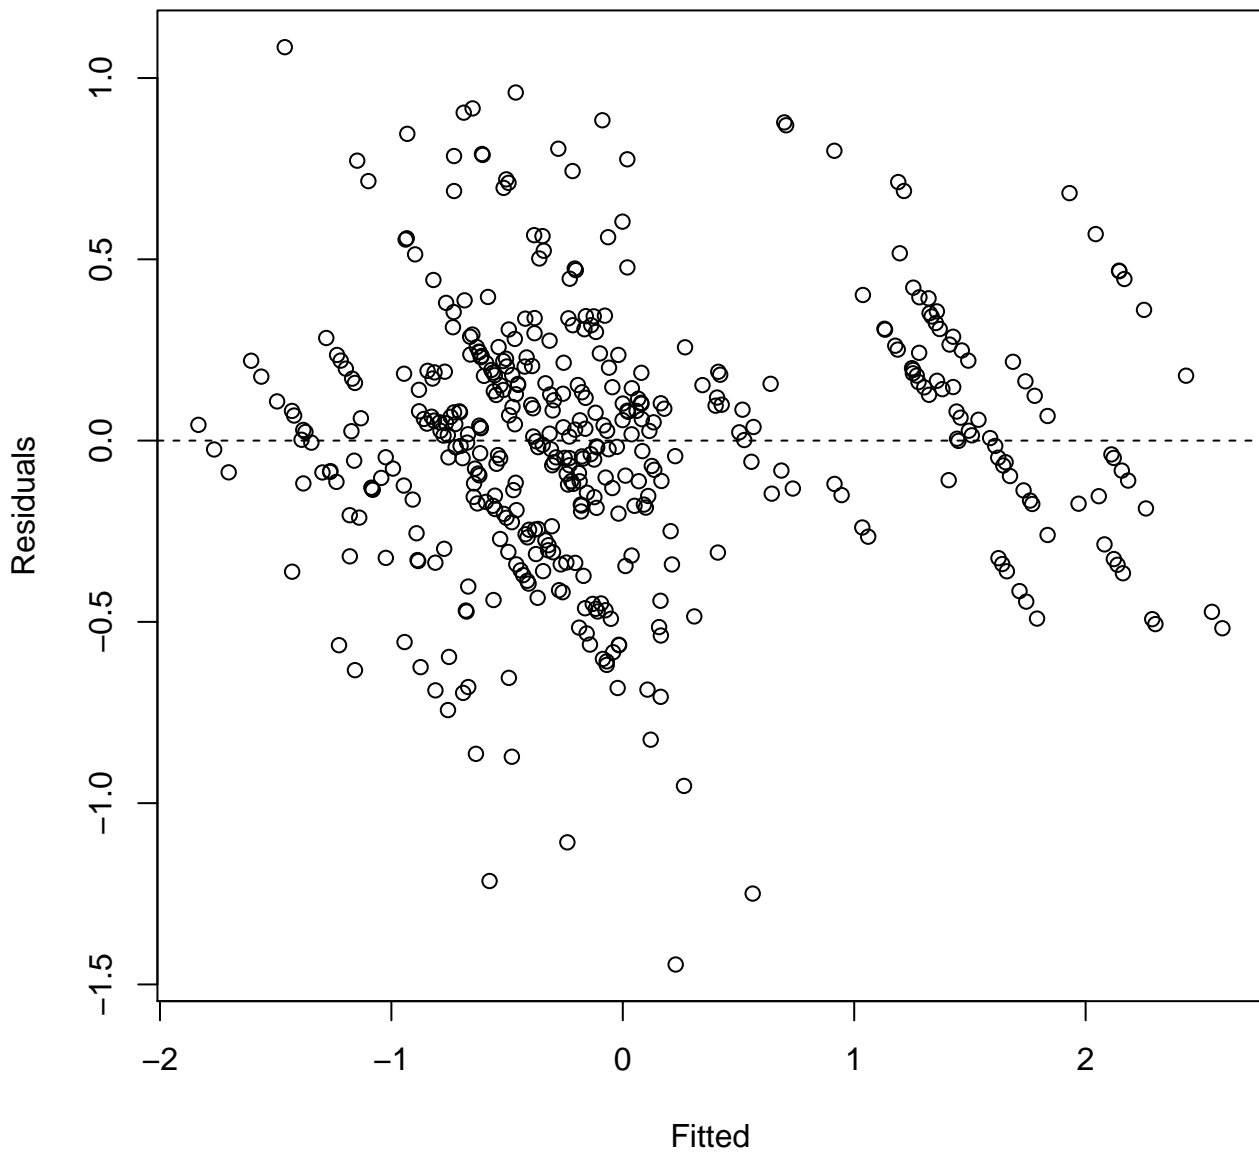

Supplement: rawData.zip [file rawData.zip]
