# Supplementary material for: A methodology for the design of experiments in computational intelligence with multiple regression models
Source: PeerJ journal article supplement (doi:10.7717/peerj.2721), 2016-12-01

**Train Yobs-Ypred**

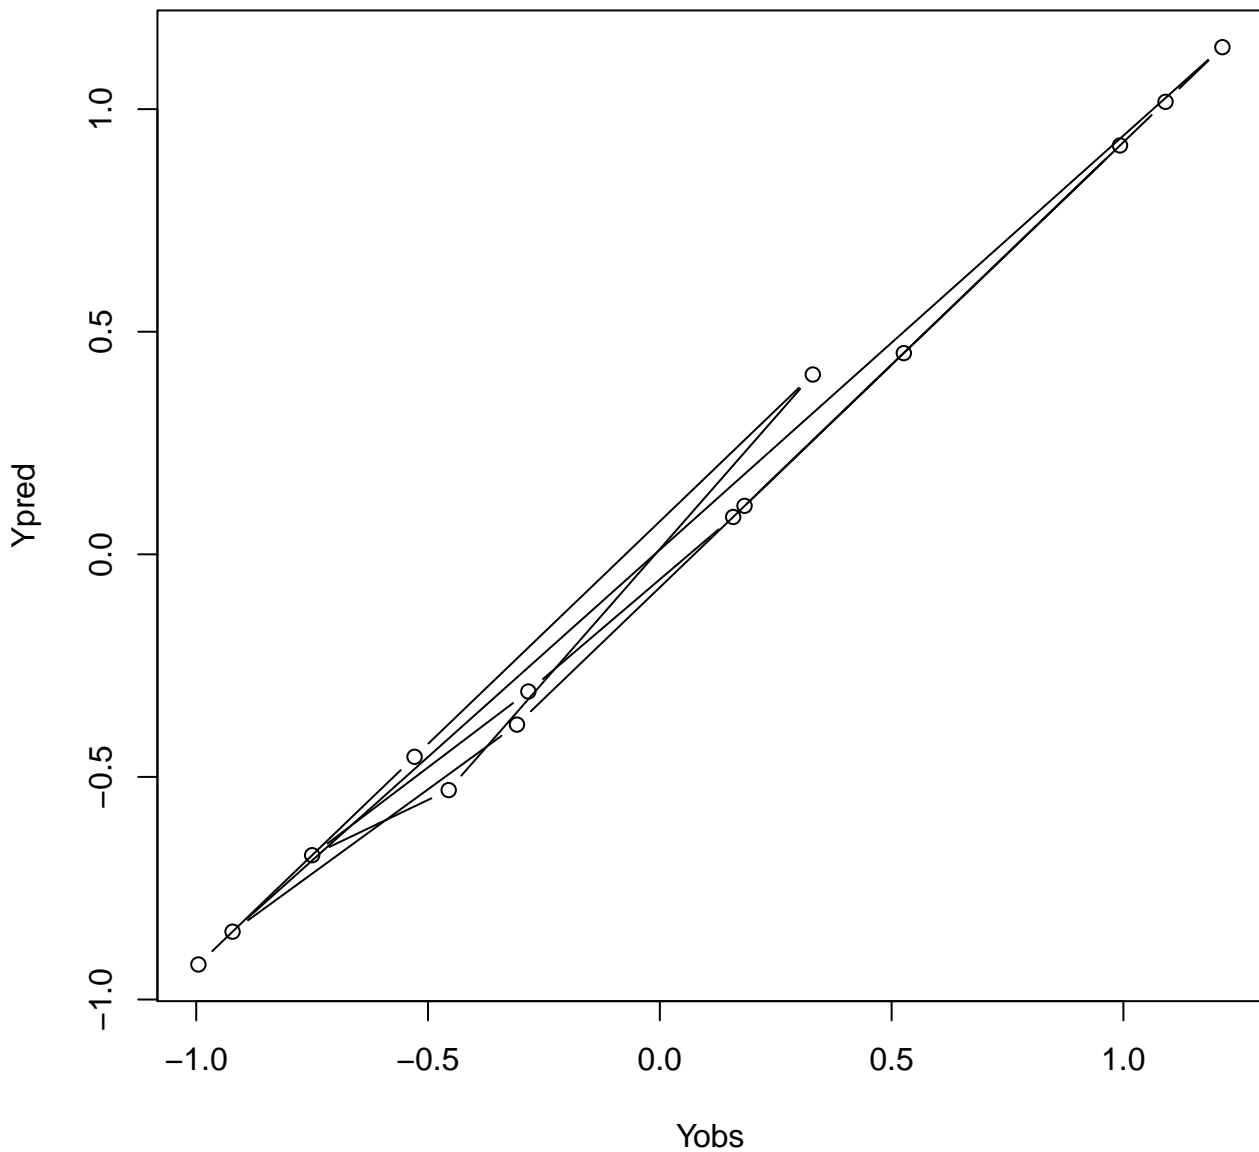

# Test Yobs-Ypred

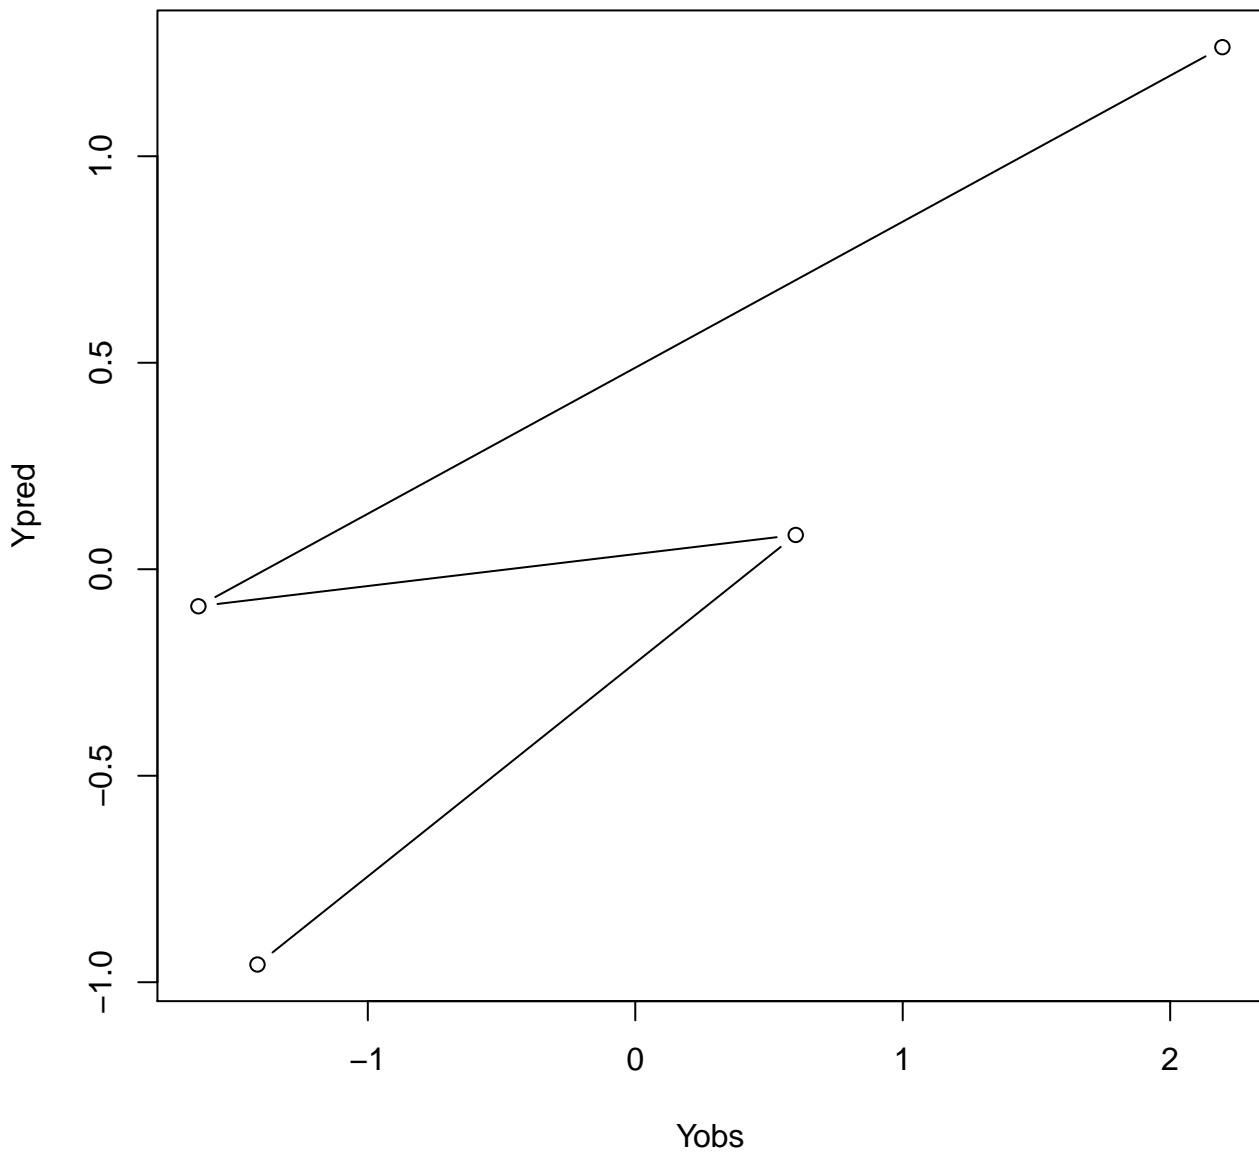

# Feature Importance

Overall

V33  
V32  
V31  
V30  
V29  
V28  
V27  
V26  
V25  
V24  
V23  
V22  
V21  
V20  
V19  
V18  
V17  
V16  
V15  
V14  
V13  
V12  
V11  
V10  
V9  
V8  
V7  
V6  
V5  
V4  
V3  
V2

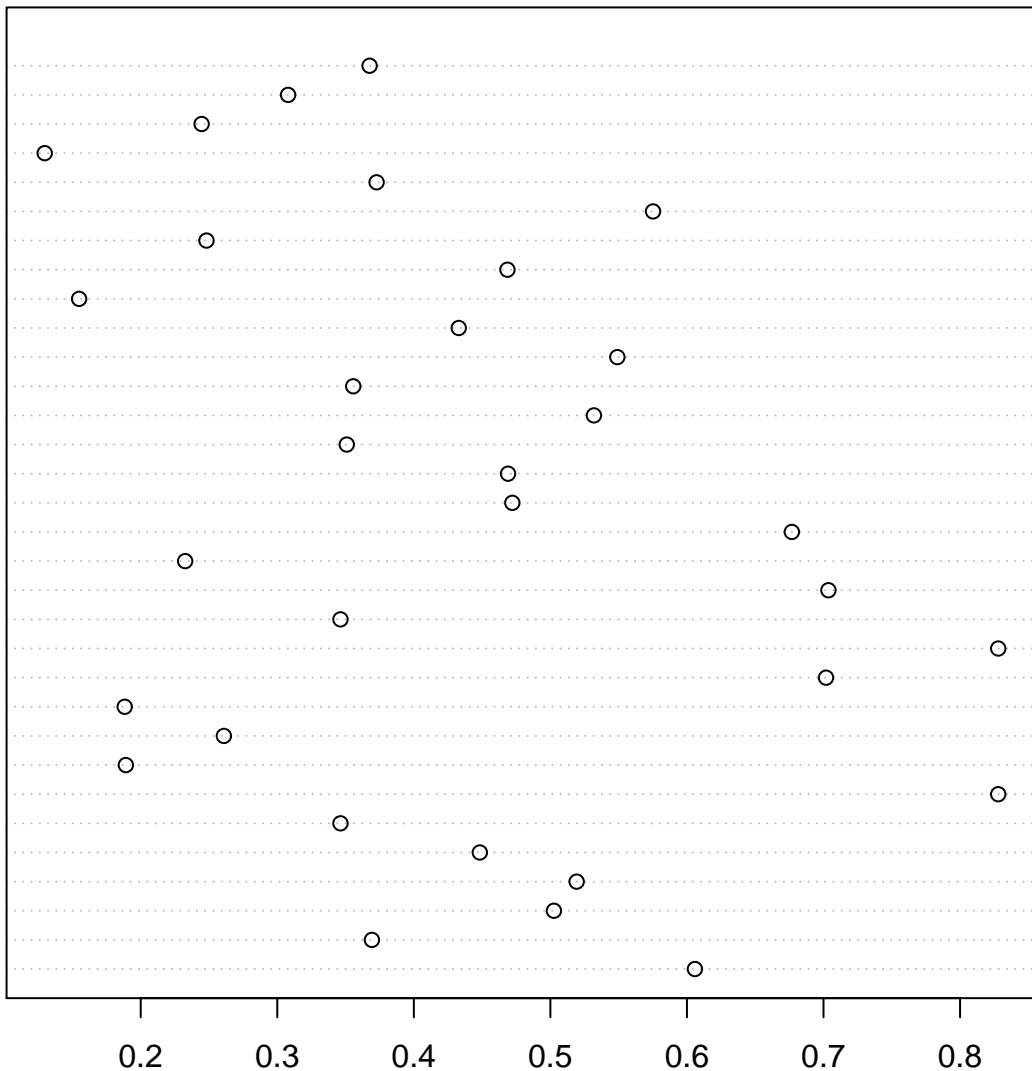

**Fitted vs. Residuals for Fitted Model**

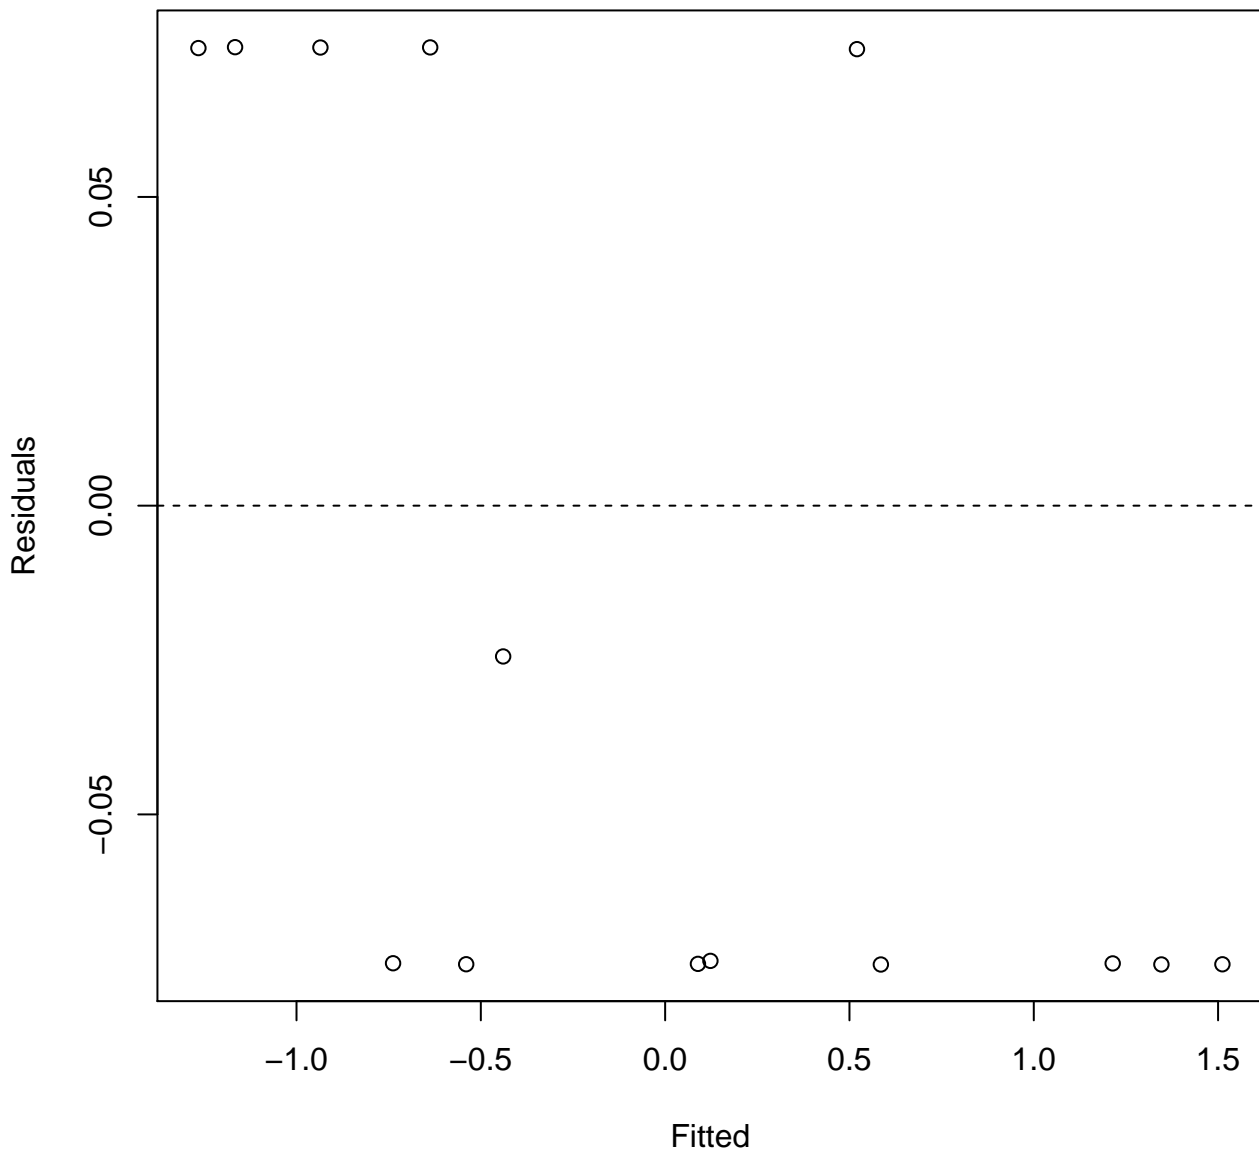

Supplement: rawData.zip [file rawData.zip]
