# Supplementary material for: A methodology for the design of experiments in computational intelligence with multiple regression models
Source: PeerJ journal article supplement (doi:10.7717/peerj.2721), 2016-12-01

Train Yobs-Ypred

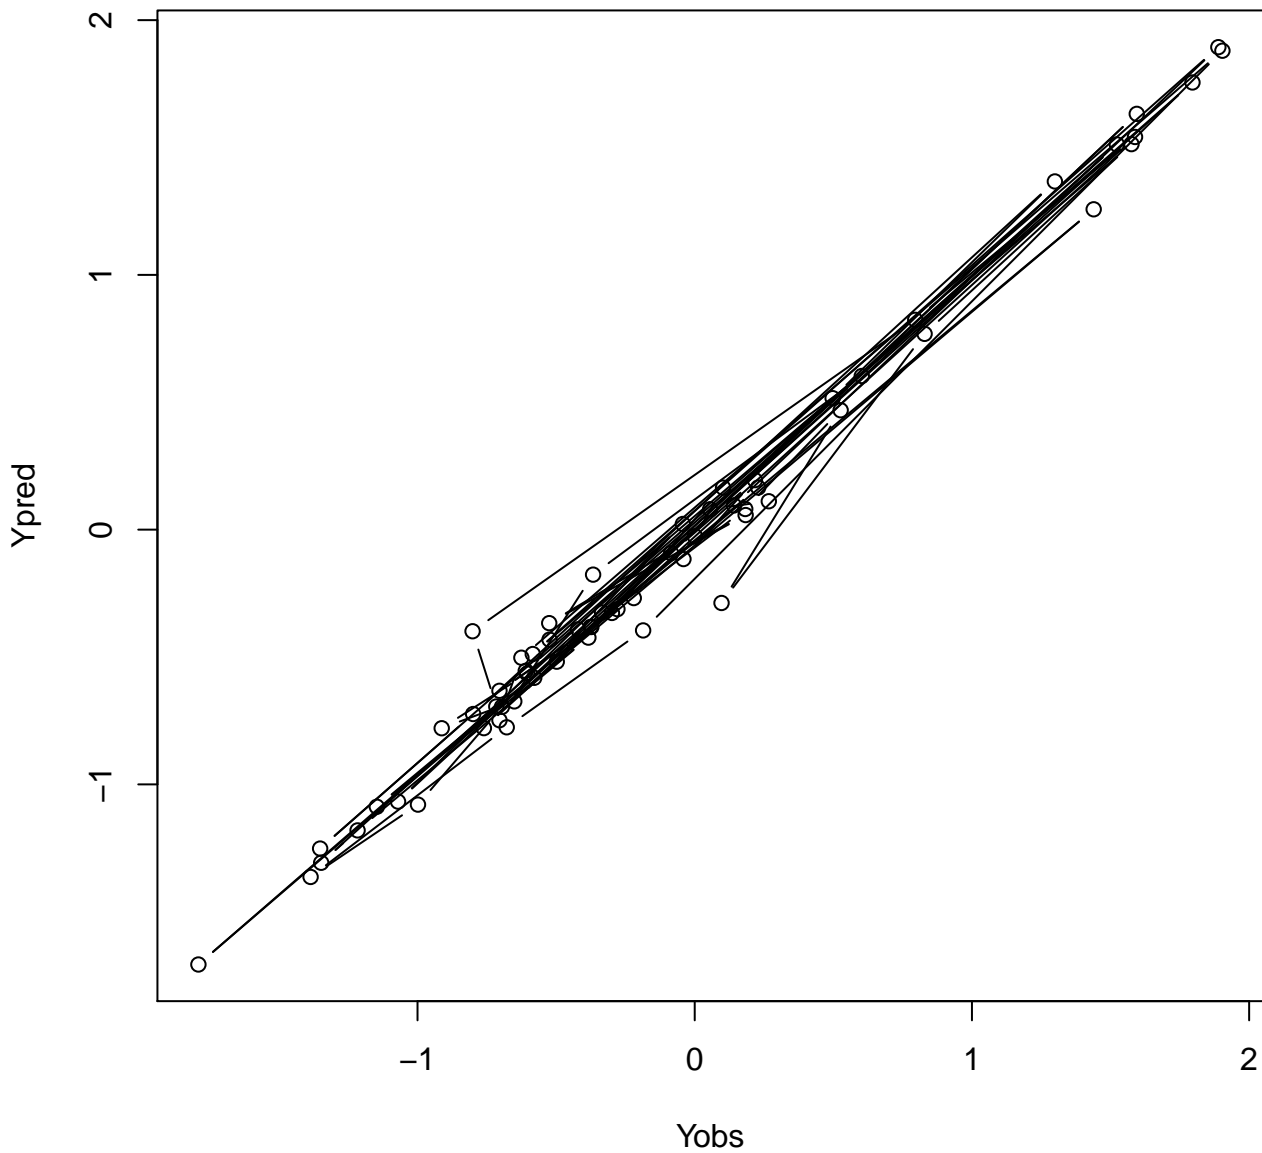

# Test Yobs-Ypred

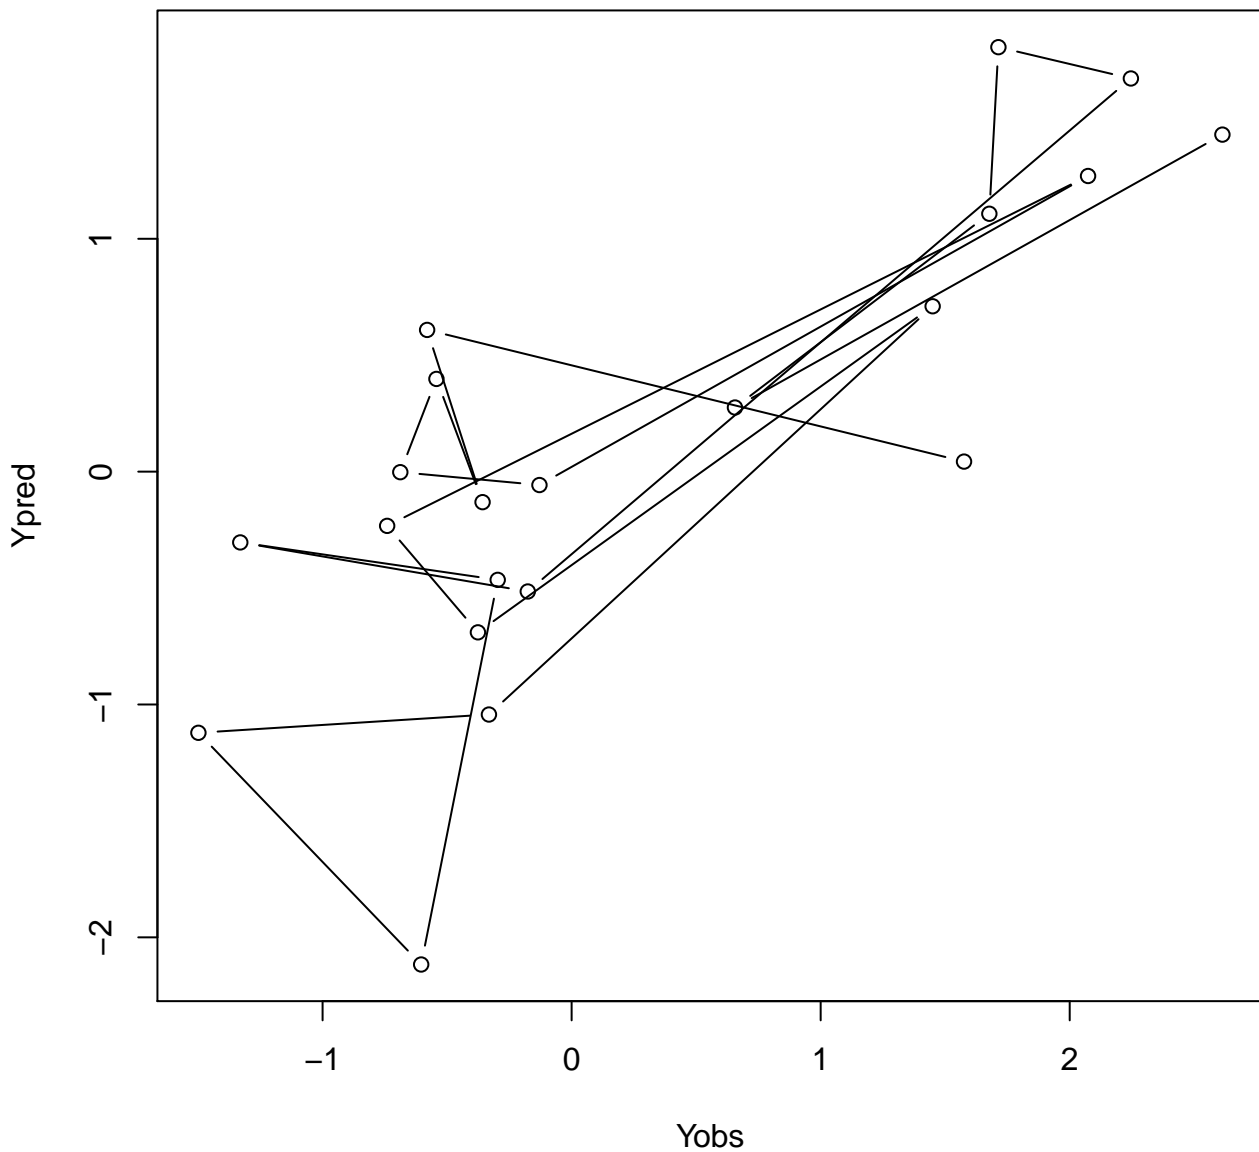

# Feature Importance

Overall  
Group 1  
Group 2  
Group 3  
Group 4  
Group 5  
Group 6  
Group 7  
Group 8  
Group 9  
Group 10  
Group 11  
Group 12  
Group 13  
Group 14  
Group 15  
Group 16  
Group 17  
Group 18  
Group 19  
Group 20  
Group 21  
Group 22  
Group 23  
Group 24  
Group 25  
Group 26  
Group 27  
Group 28  
Group 29  
Group 30  
Group 31  
Group 32  
Group 33  
Group 34  
Group 35  
Group 36  
Group 37  
Group 38  
Group 39  
Group 40  
Group 41  
Group 42  
Group 43  
Group 44  
Group 45  
Group 46  
Group 47  
Group 48  
Group 49  
Group 50  
Group 51  
Group 52  
Group 53  
Group 54  
Group 55  
Group 56  
Group 57  
Group 58  
Group 59  
Group 60  
Group 61  
Group 62  
Group 63  
Group 64  
Group 65  
Group 66  
Group 67  
Group 68  
Group 69  
Group 70  
Group 71  
Group 72  
Group 73  
Group 74  
Group 75  
Group 76  
Group 77  
Group 78  
Group 79  
Group 80  
Group 81  
Group 82  
Group 83  
Group 84  
Group 85  
Group 86  
Group 87  
Group 88  
Group 89  
Group 90  
Group 91  
Group 92  
Group 93  
Group 94  
Group 95  
Group 96  
Group 97  
Group 98  
Group 99  
Group 100

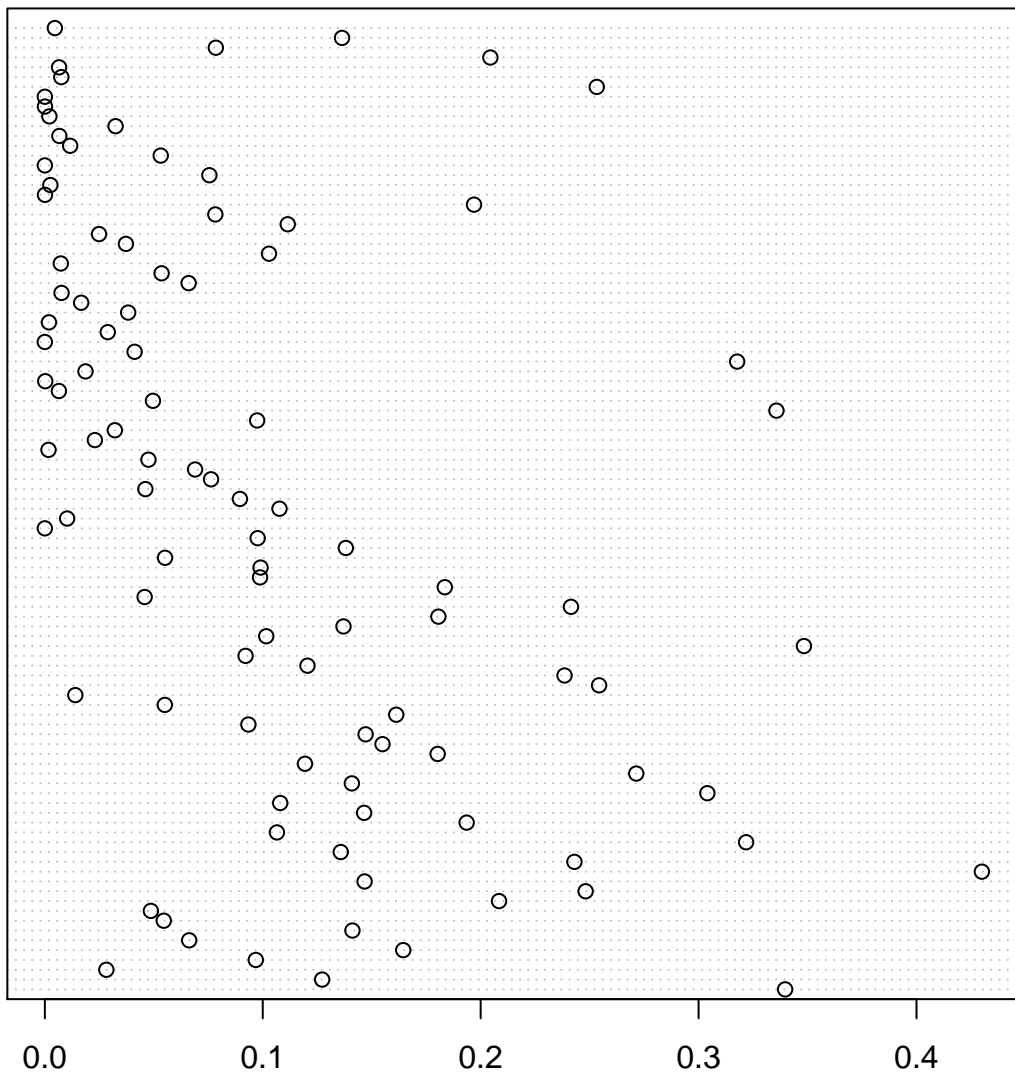

**Fitted vs. Residuals for Fitted Model**

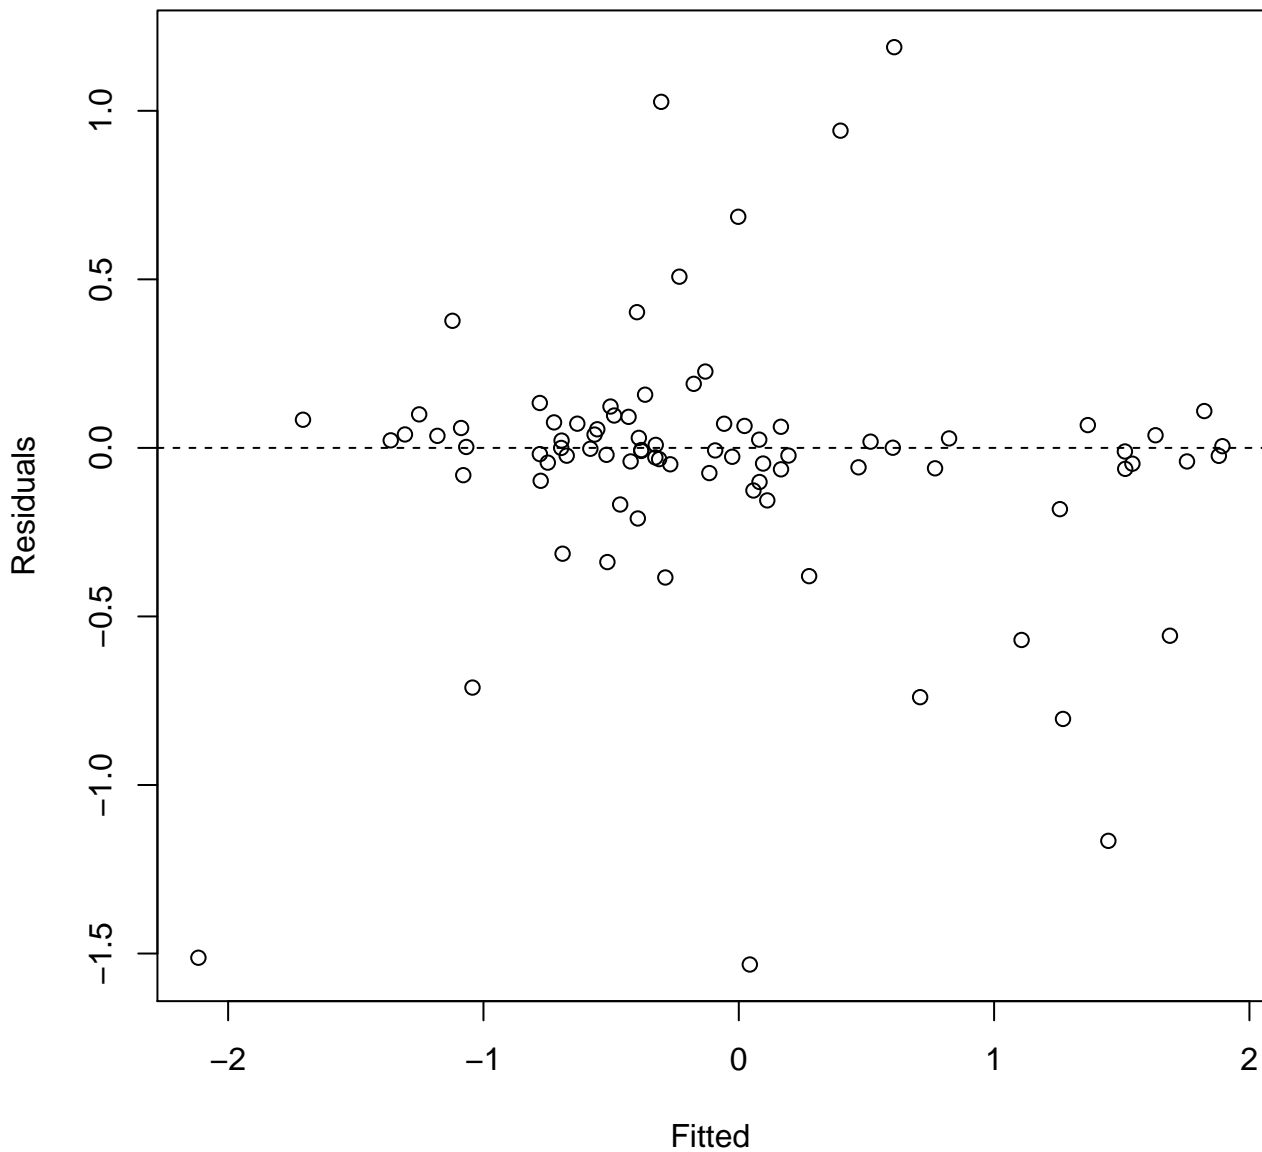

Supplement: rawData.zip [file rawData.zip]
