# Supplementary figures and images for: A methodology for the design of experiments in computational intelligence with multiple regression models (part 3 of 3)
Source: PeerJ journal article supplement (doi:10.7717/peerj.2721), 2016-12-01

# Models' differences on the training set (data split 4)

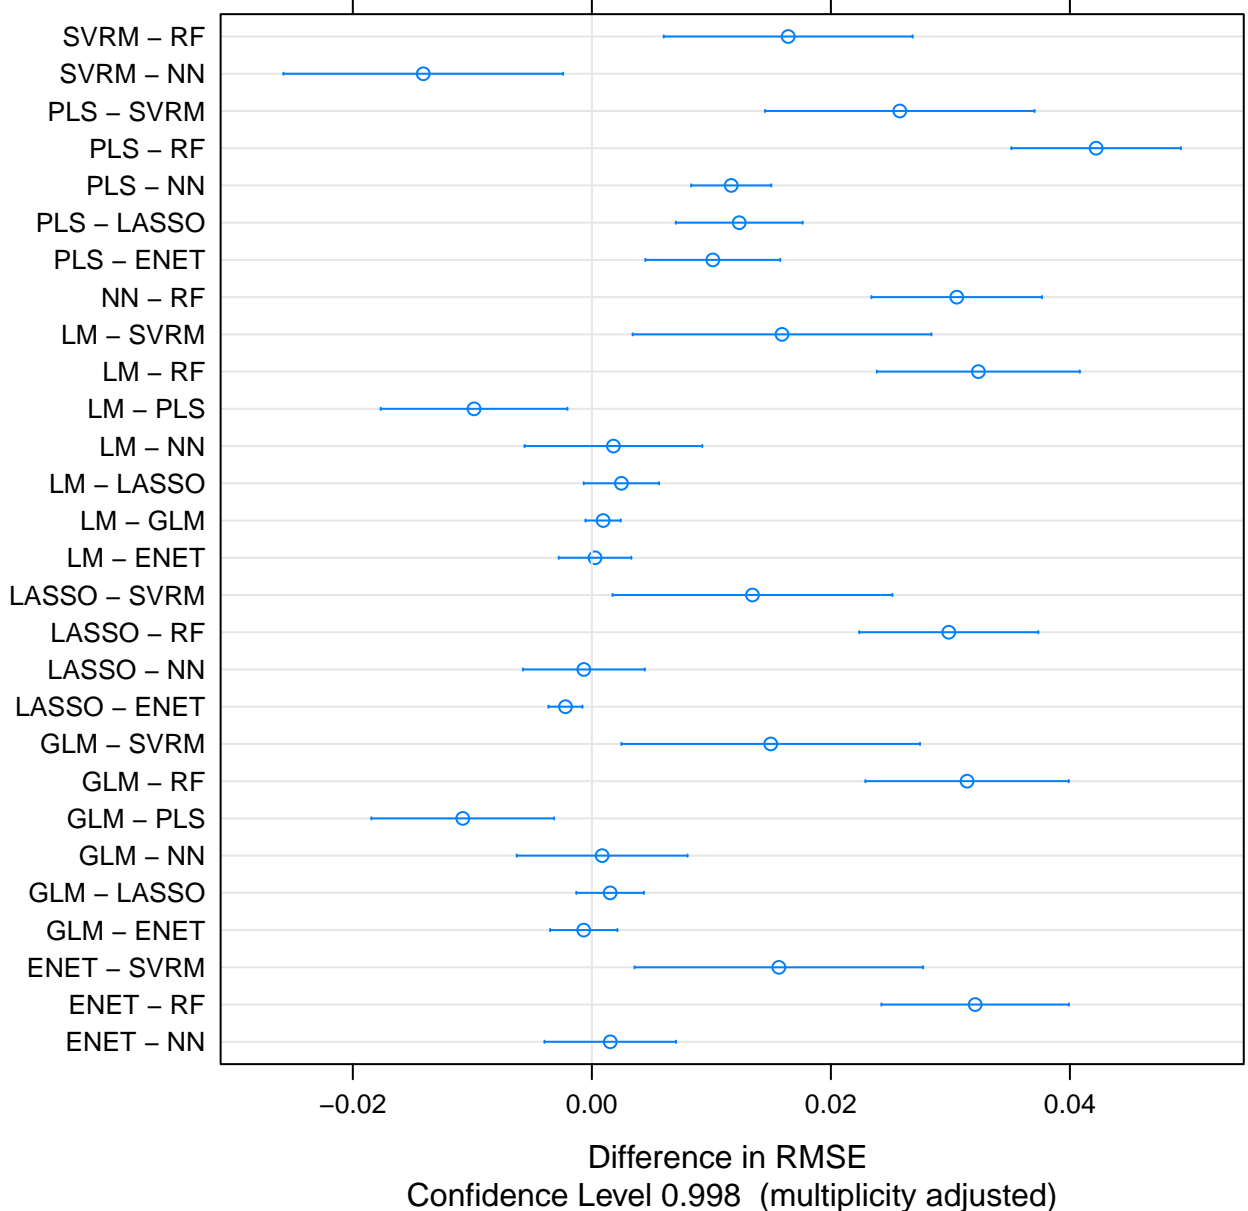

Supplement: rawData.zip [file rawData.zip]

# Models' differences on the training set (data split 3)

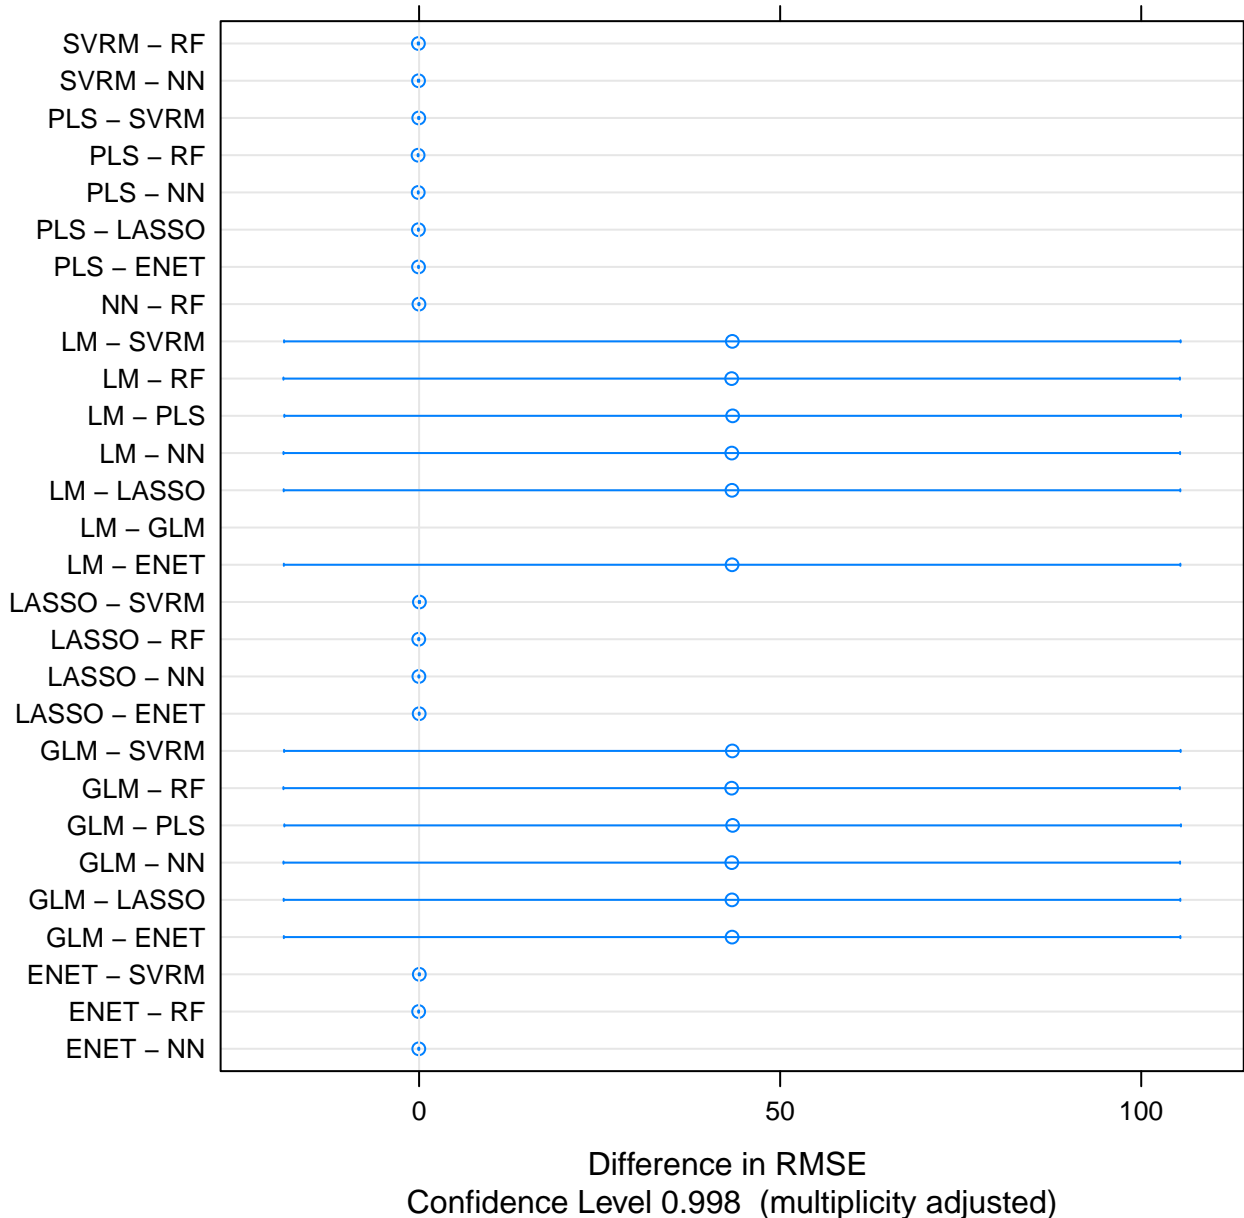

Supplement: rawData.zip [file rawData.zip]

# Models' differences on the training set (data split 1)

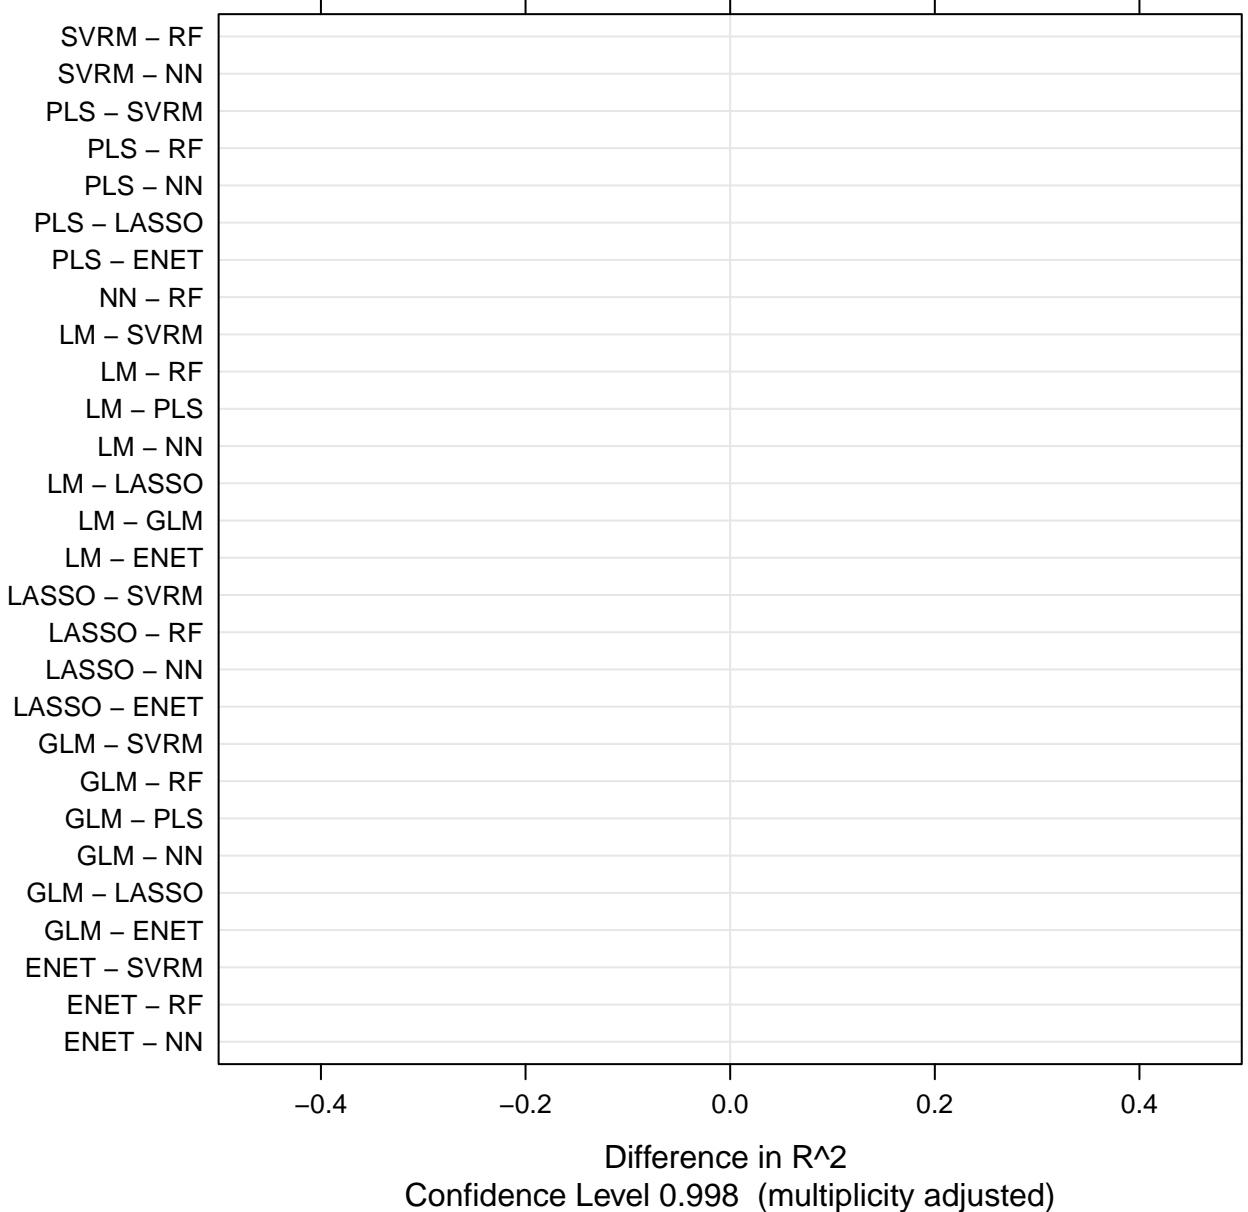

Supplement: rawData.zip [file rawData.zip]

# Models' differences on the training set (data split 7)

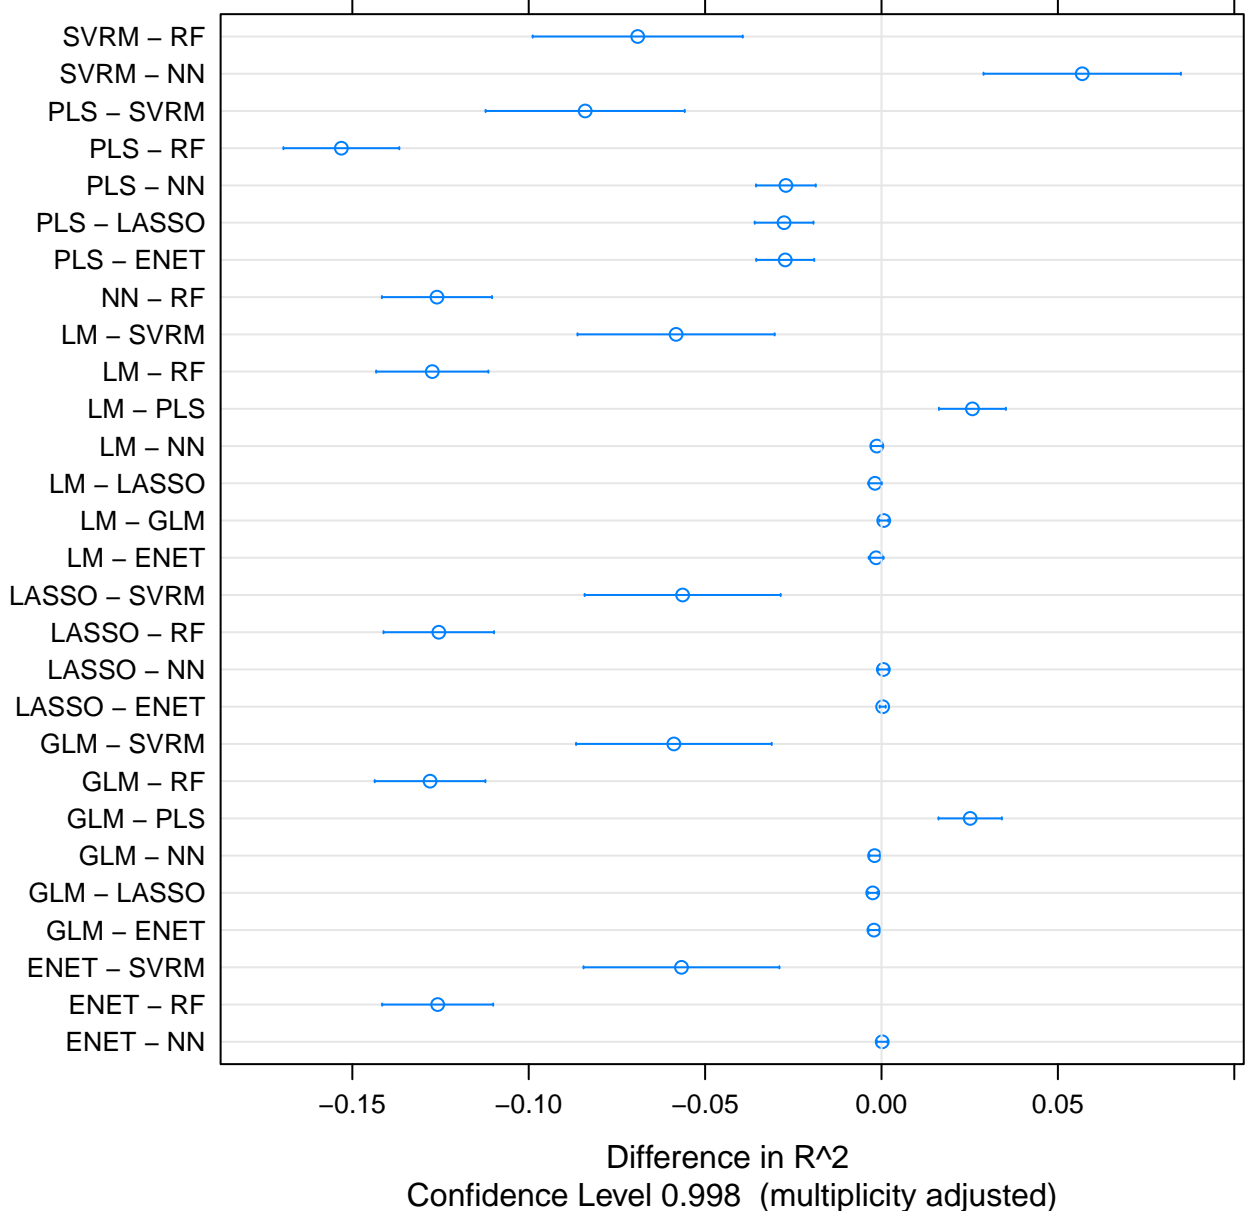

Supplement: rawData.zip [file rawData.zip]

# Models' differences on the training set (data split 10)

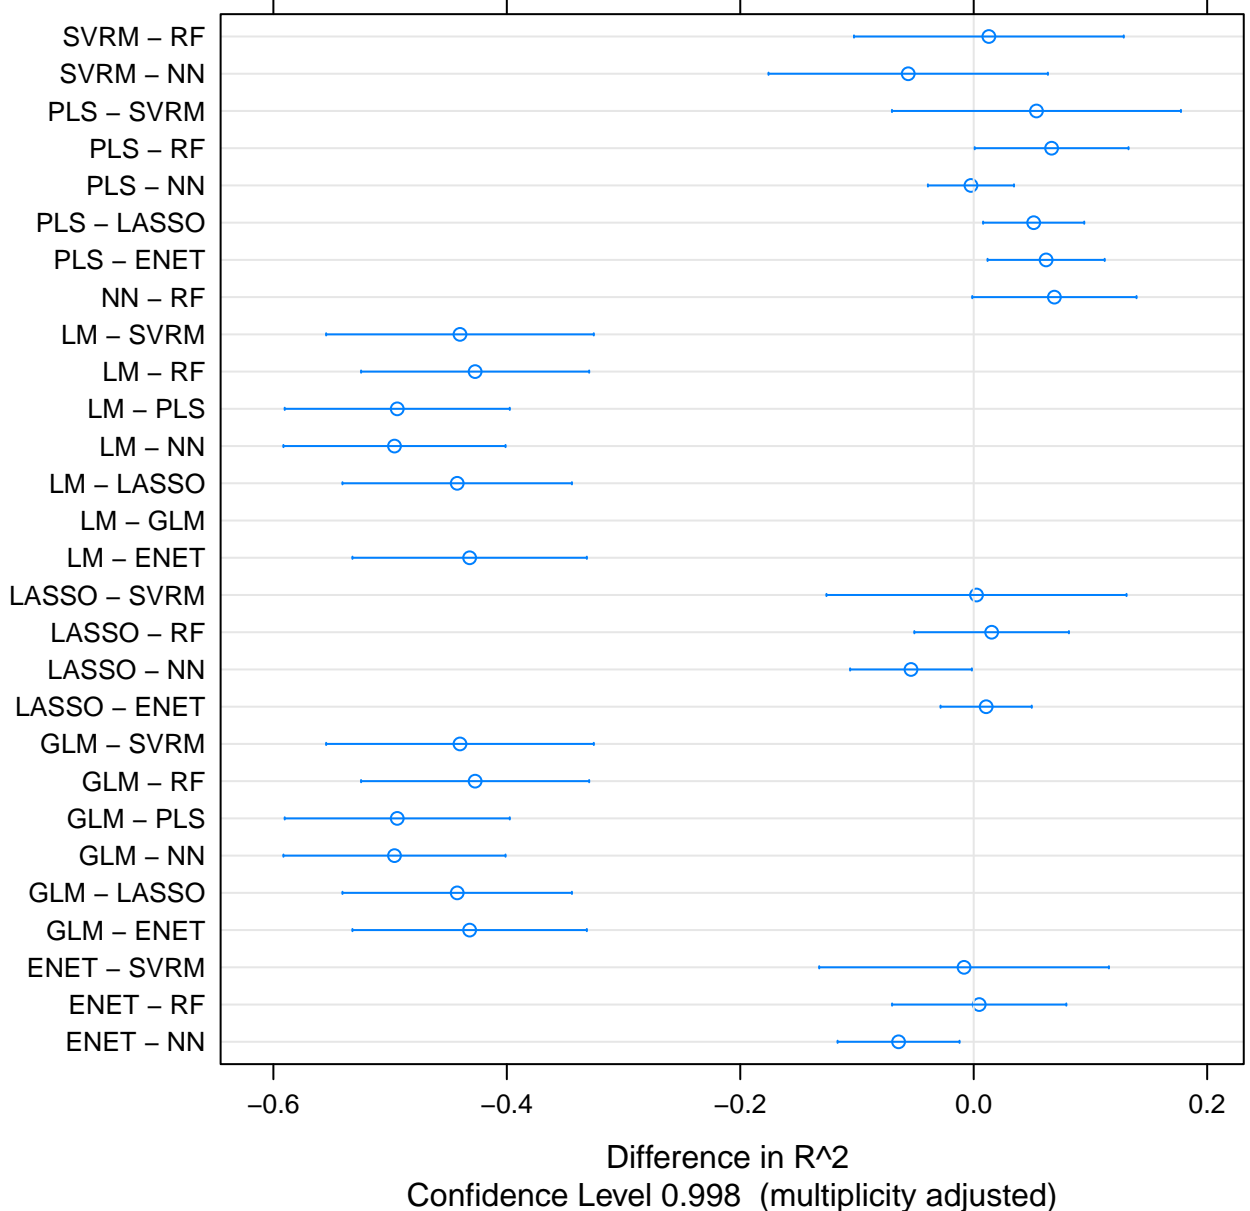

Supplement: rawData.zip [file rawData.zip]

# Resampling results on the training set (data split 5)

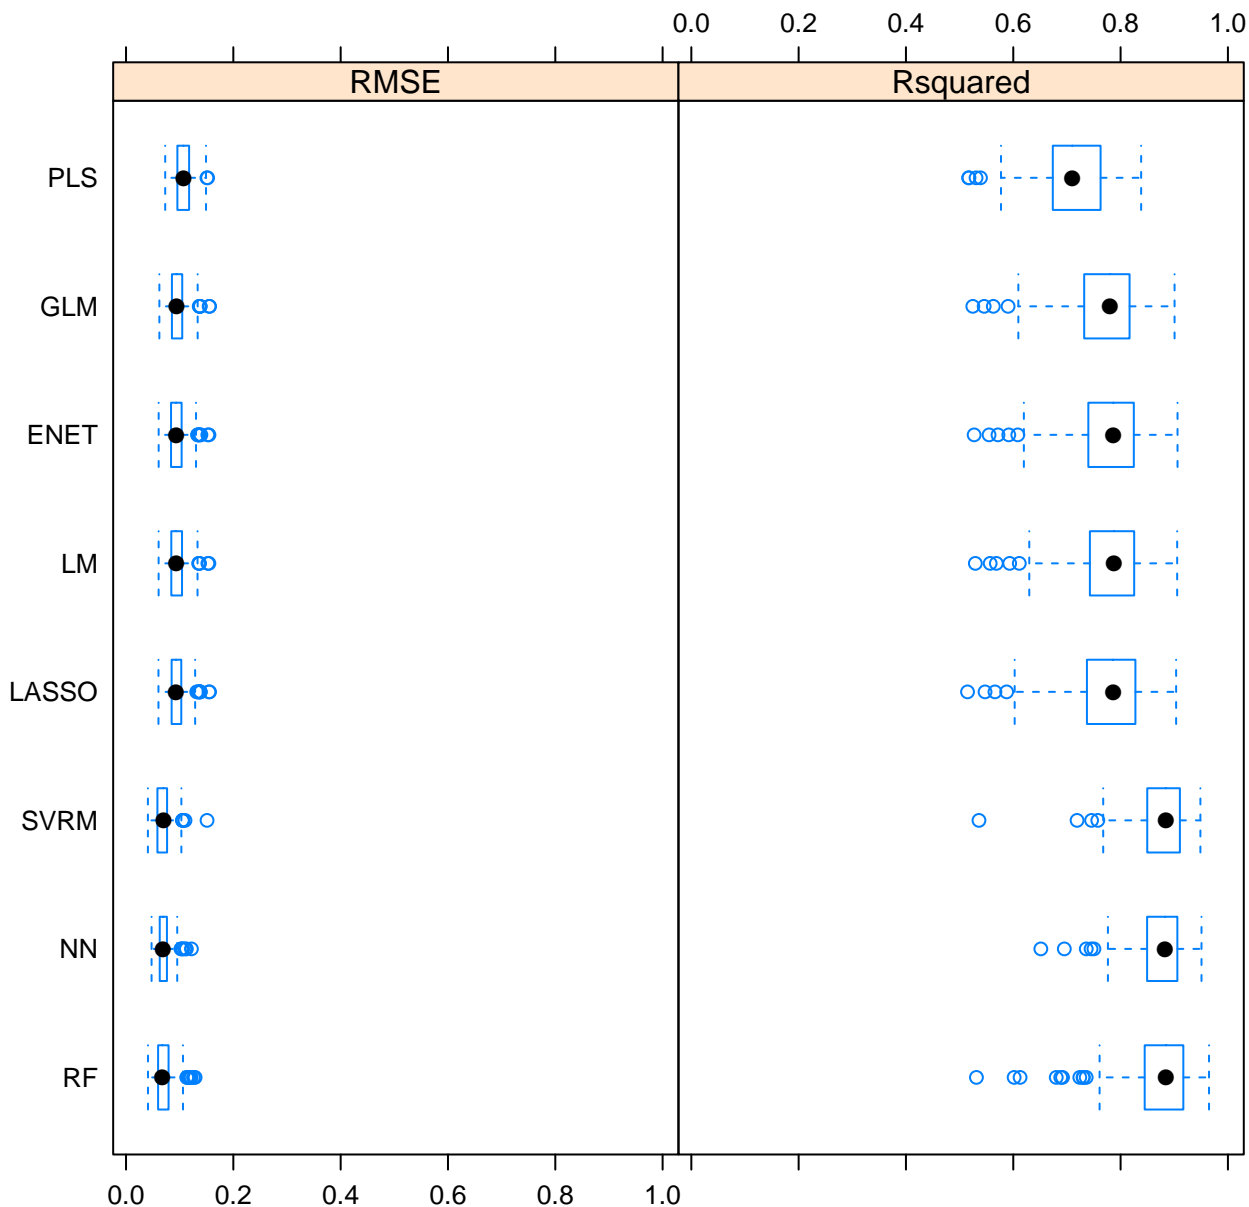

Supplement: rawData.zip [file rawData.zip]

# Models' differences on the training set (data split 6)

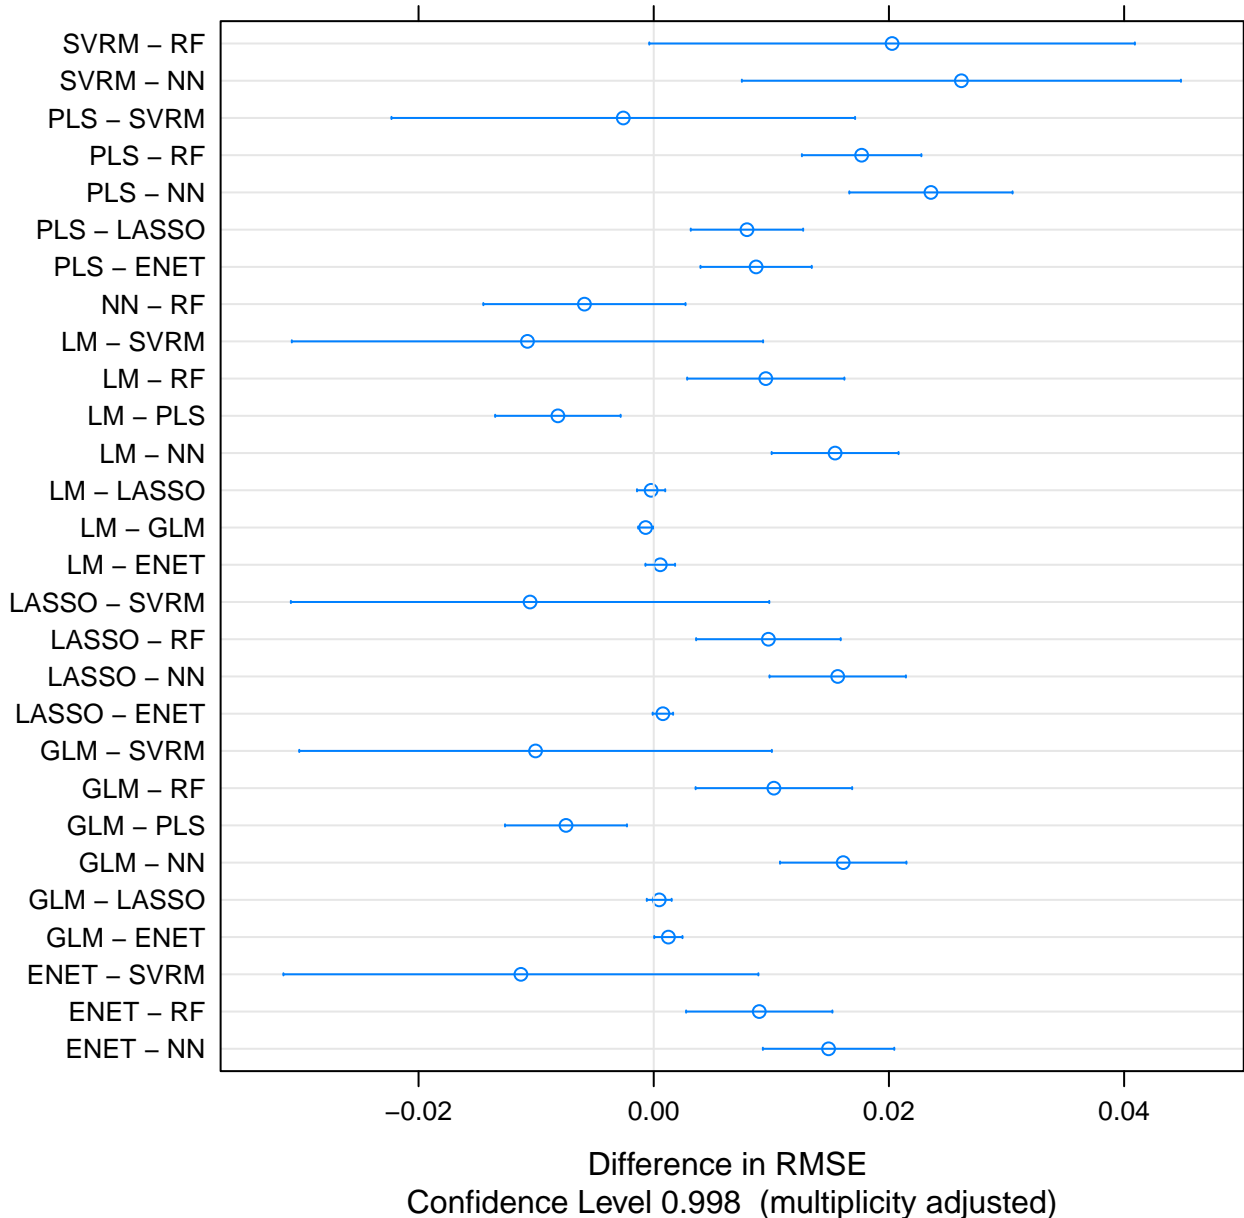

Supplement: rawData.zip [file rawData.zip]

# Resampling results on the training set (data split 10)

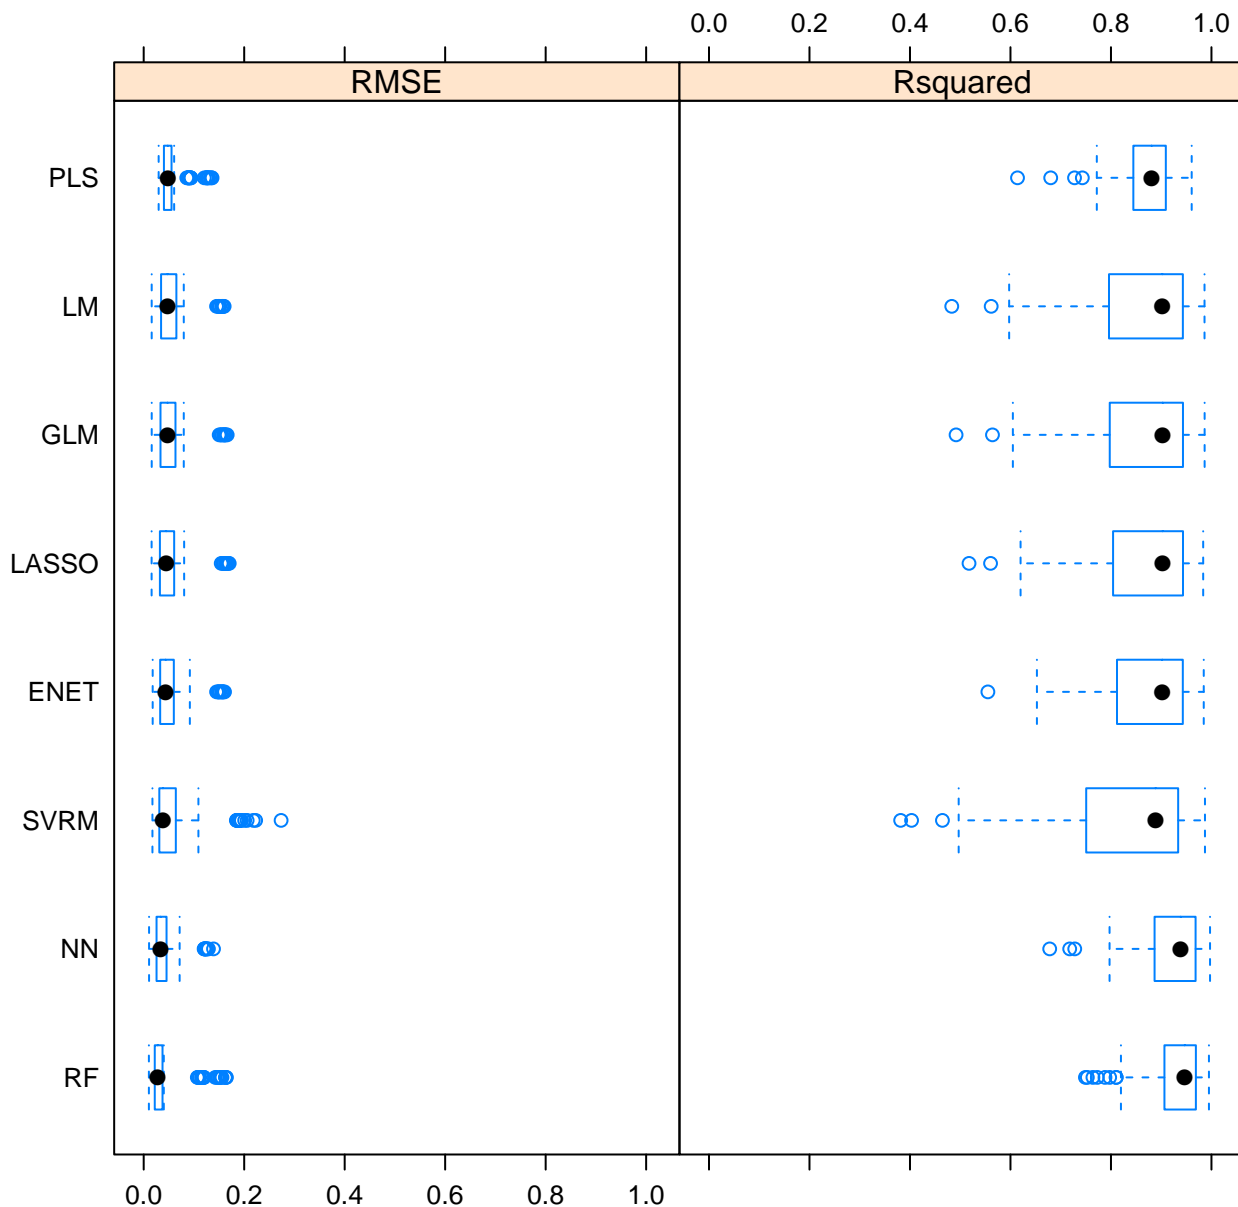

Supplement: rawData.zip [file rawData.zip]

# Resampling results on the training set (data split 2)

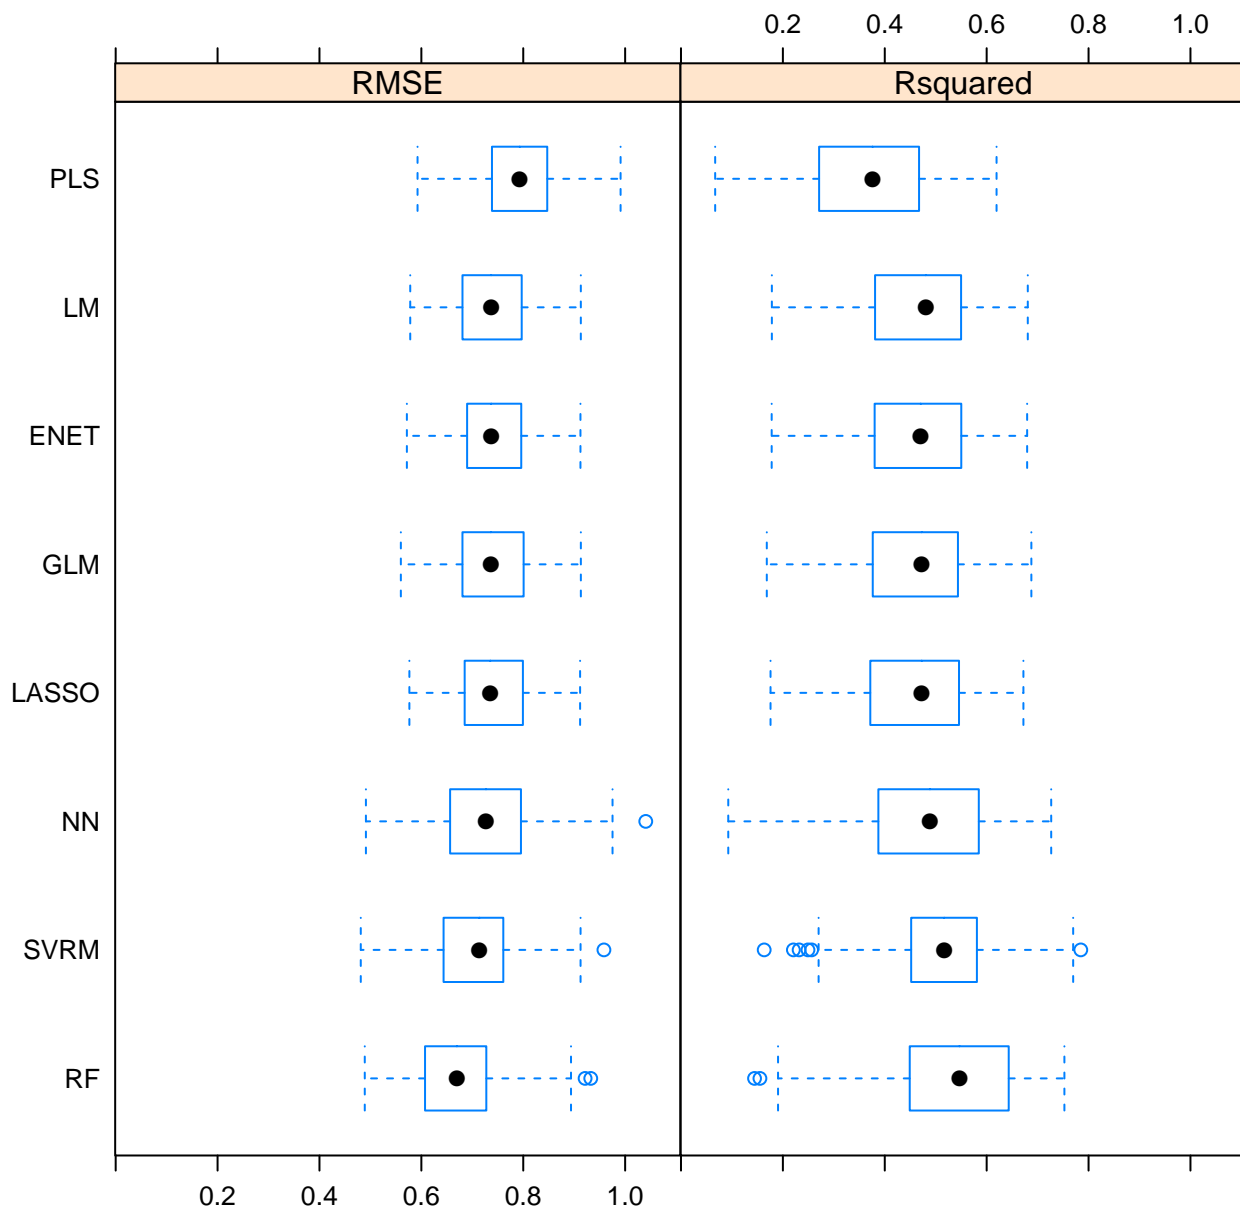

Supplement: rawData.zip [file rawData.zip]

# Models' differences on the training set (data split 10)

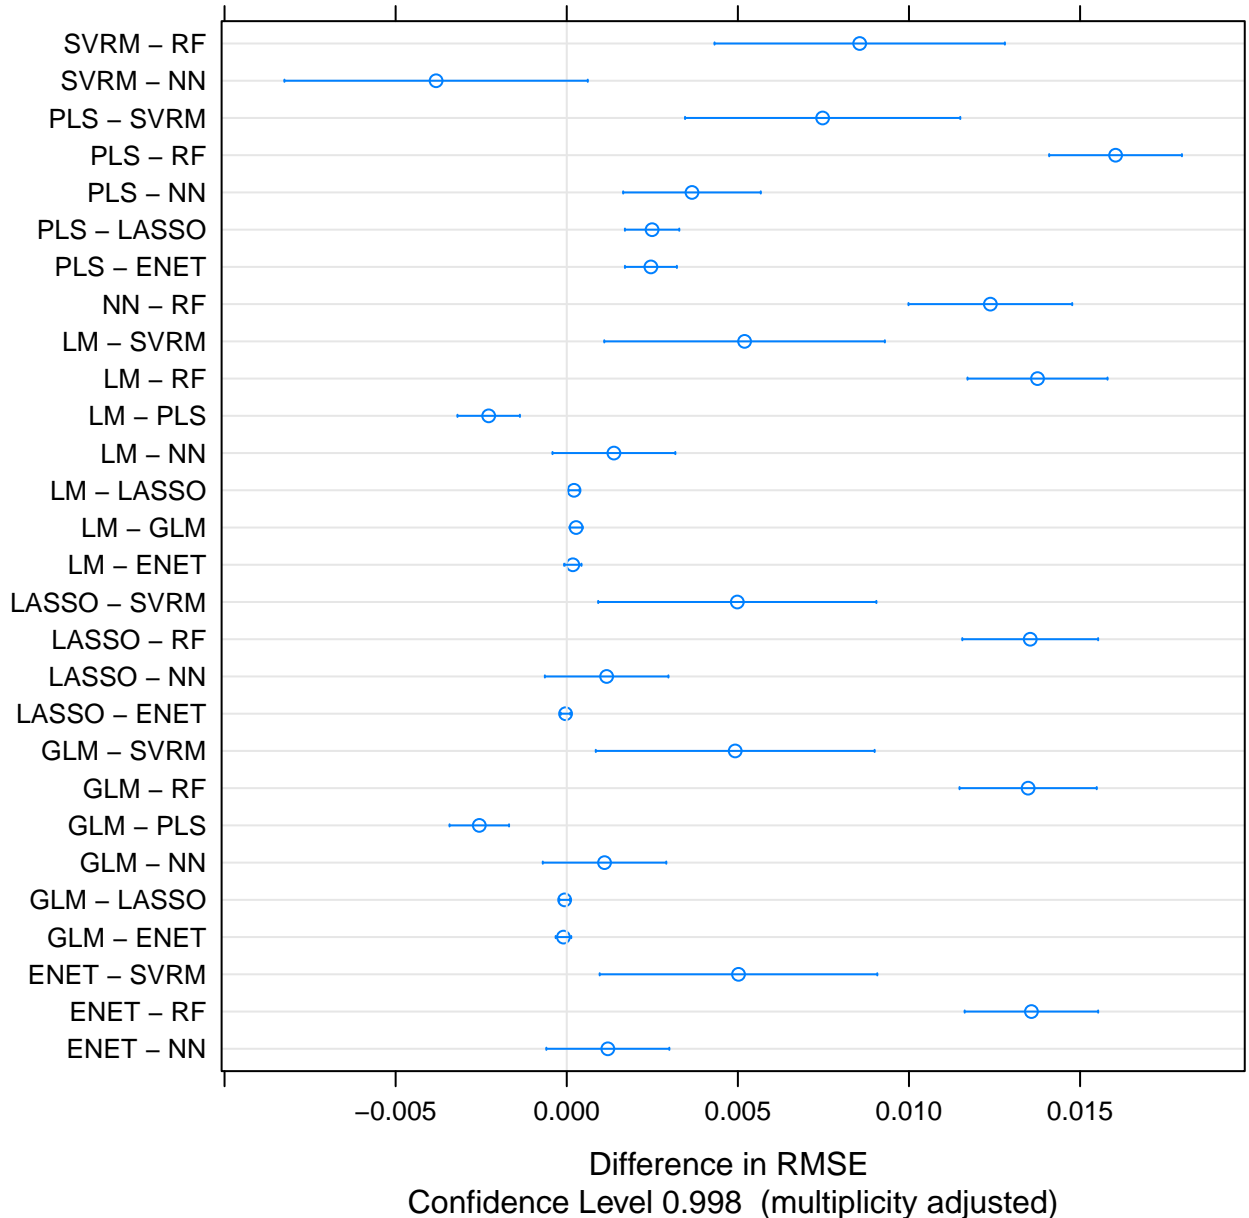

Supplement: rawData.zip [file rawData.zip]

# Models' differences on the training set (data split 7)

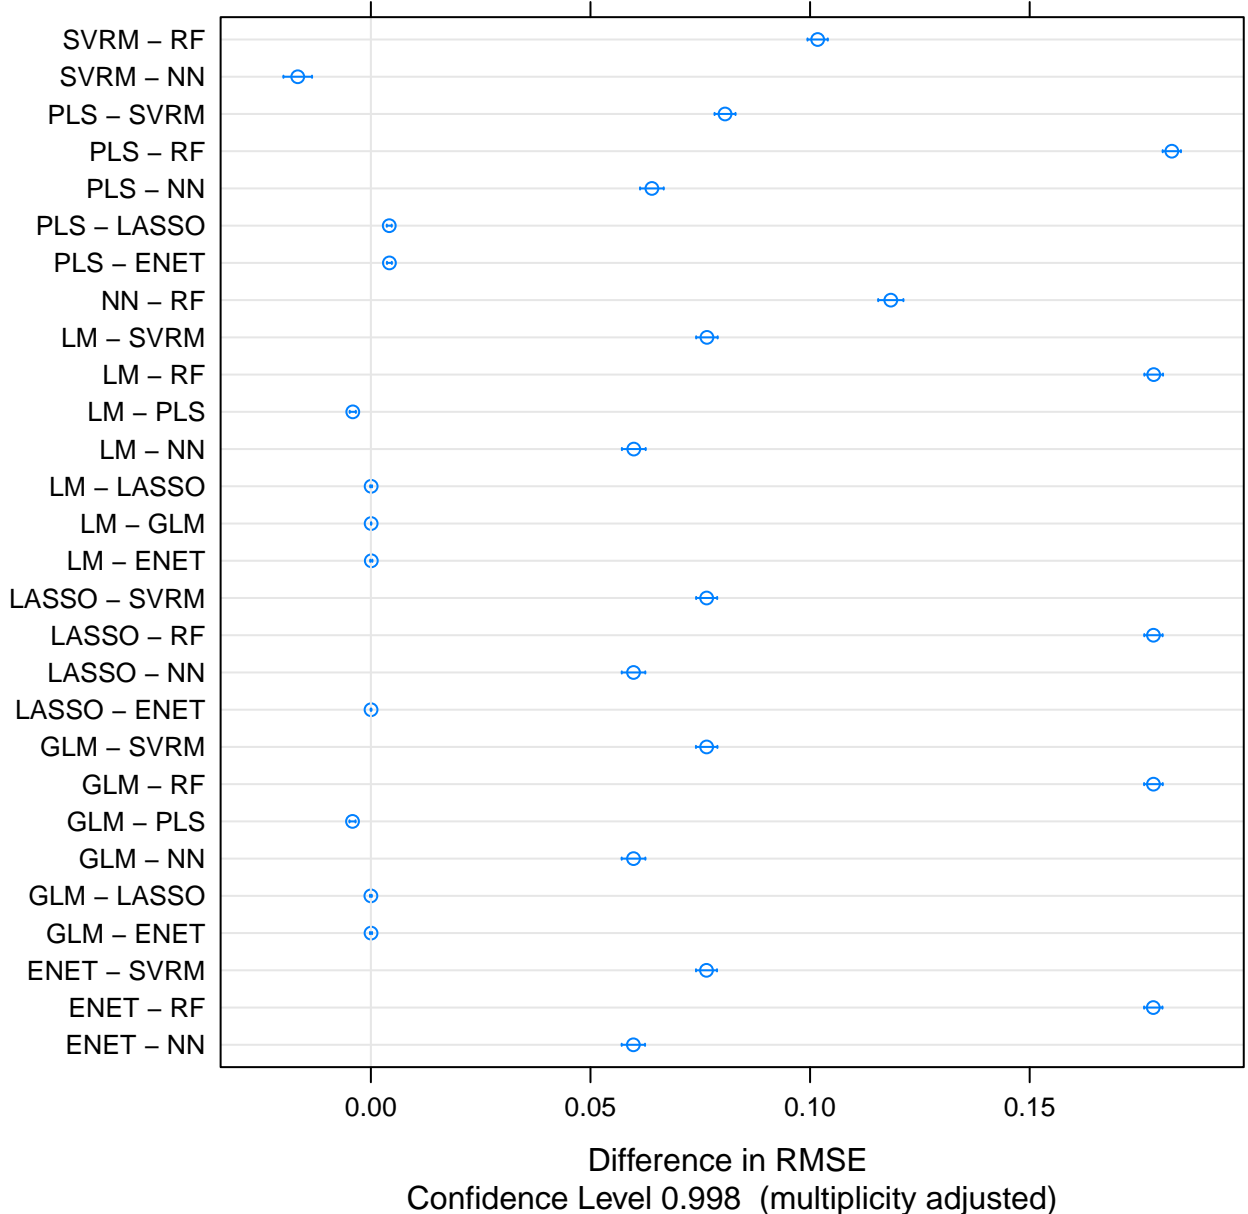

Supplement: rawData.zip [file rawData.zip]

# Resampling results on the training set (data split 7)

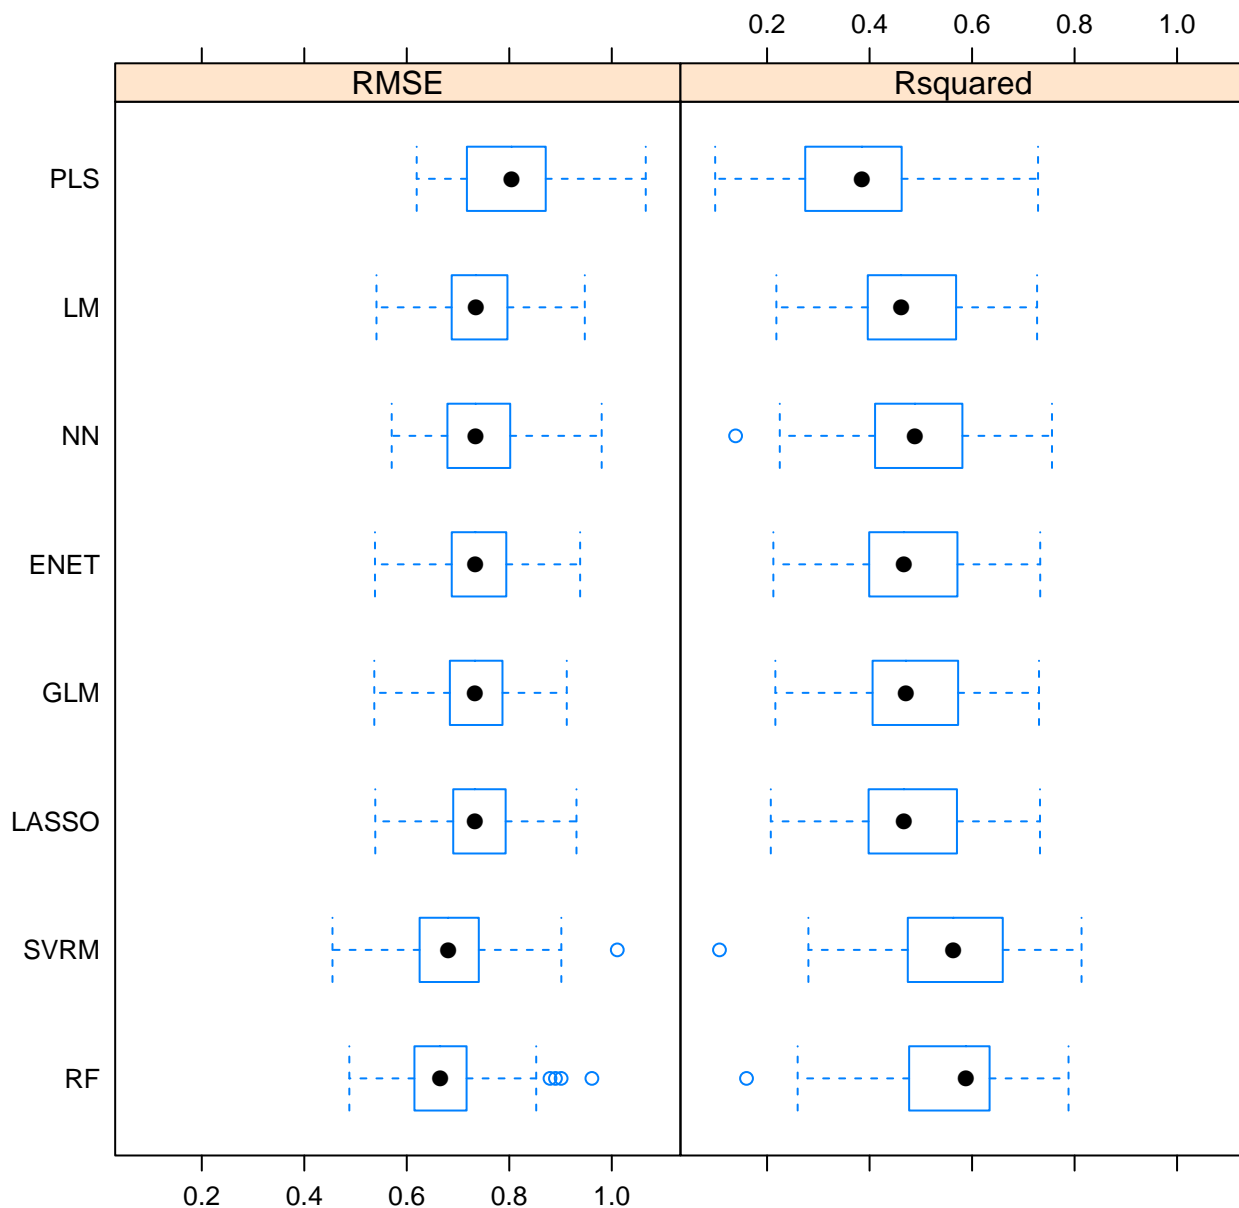

Supplement: rawData.zip [file rawData.zip]

# Resampling results on the training set (data split 9)

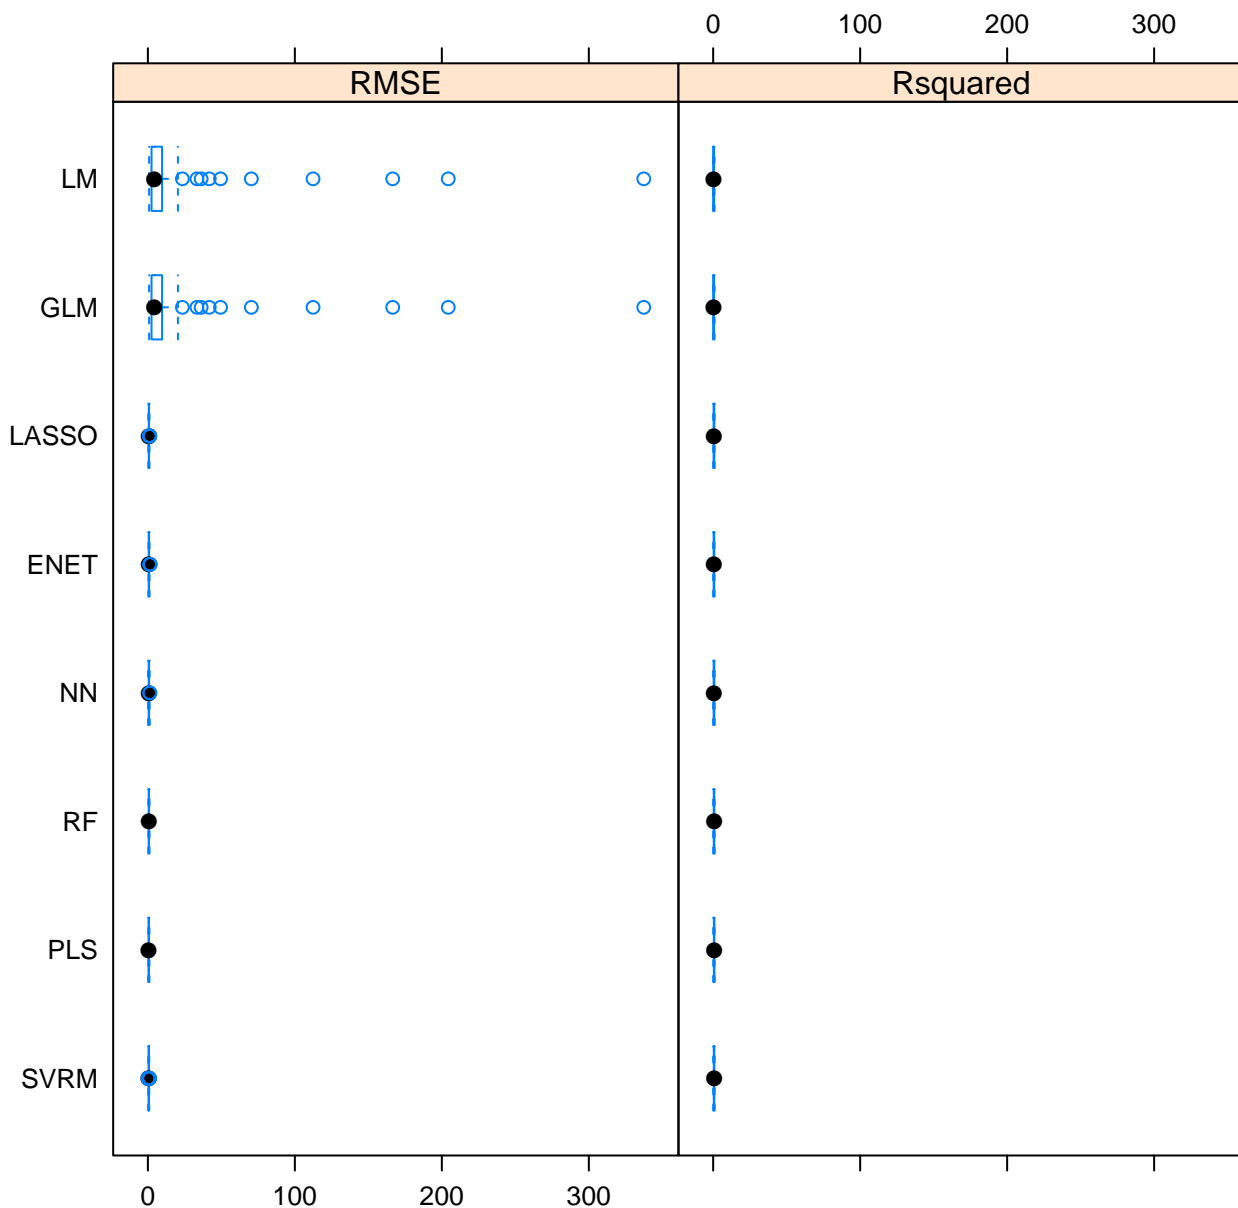

Supplement: rawData.zip [file rawData.zip]

# Models' differences on the training set (data split 7)

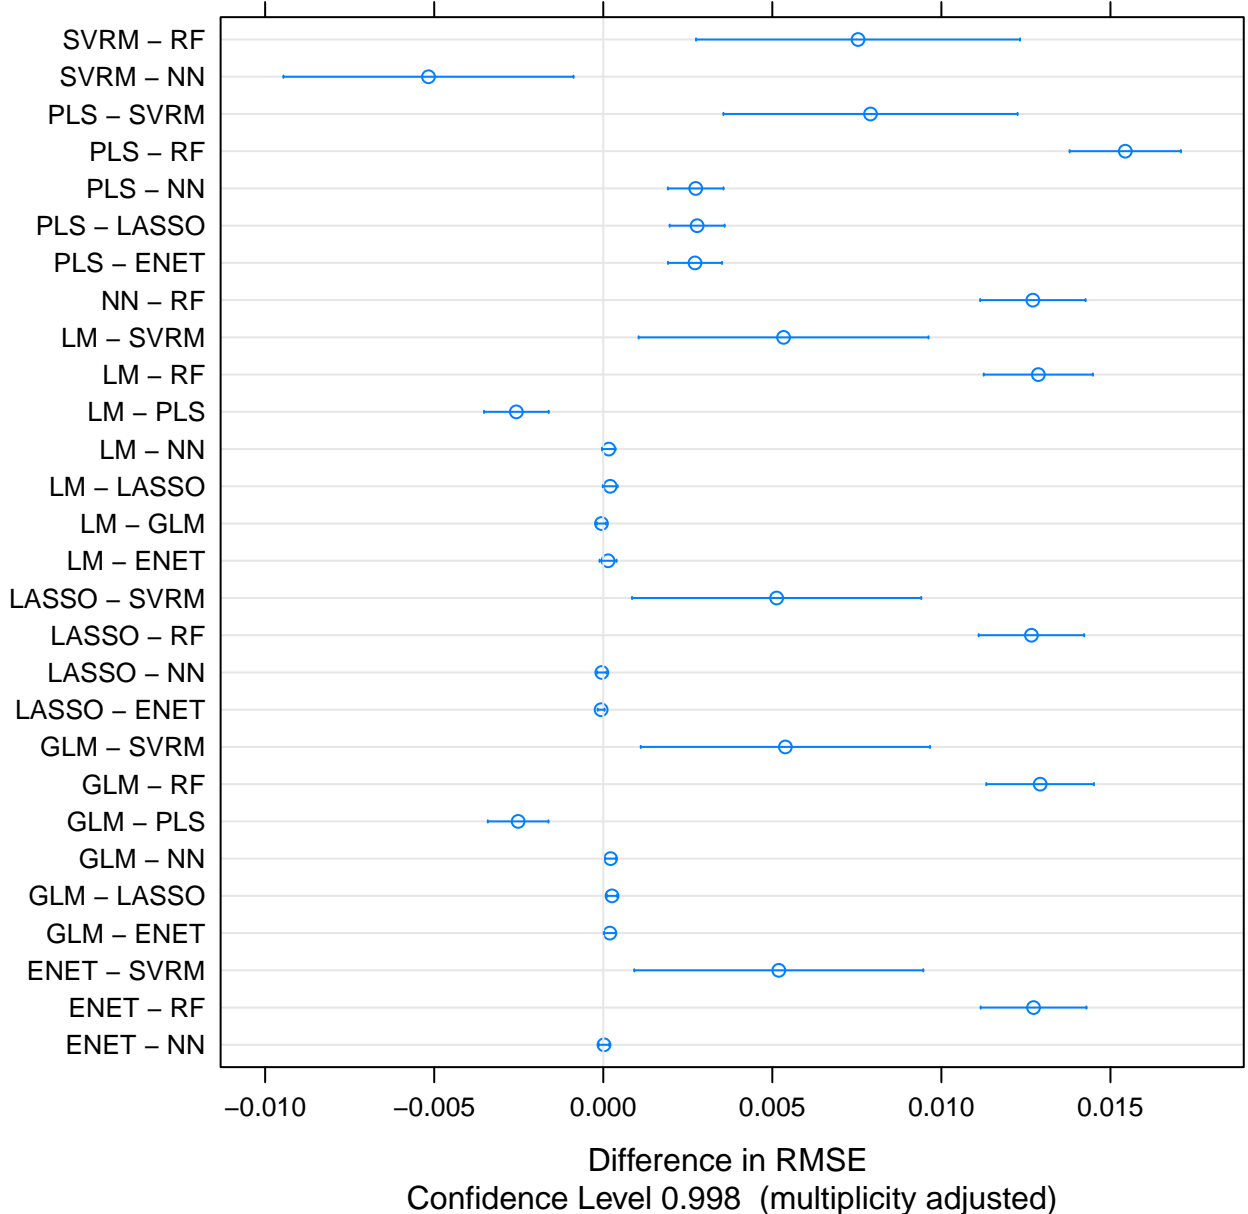

Supplement: rawData.zip [file rawData.zip]

# Models' differences on the training set (data split 8)

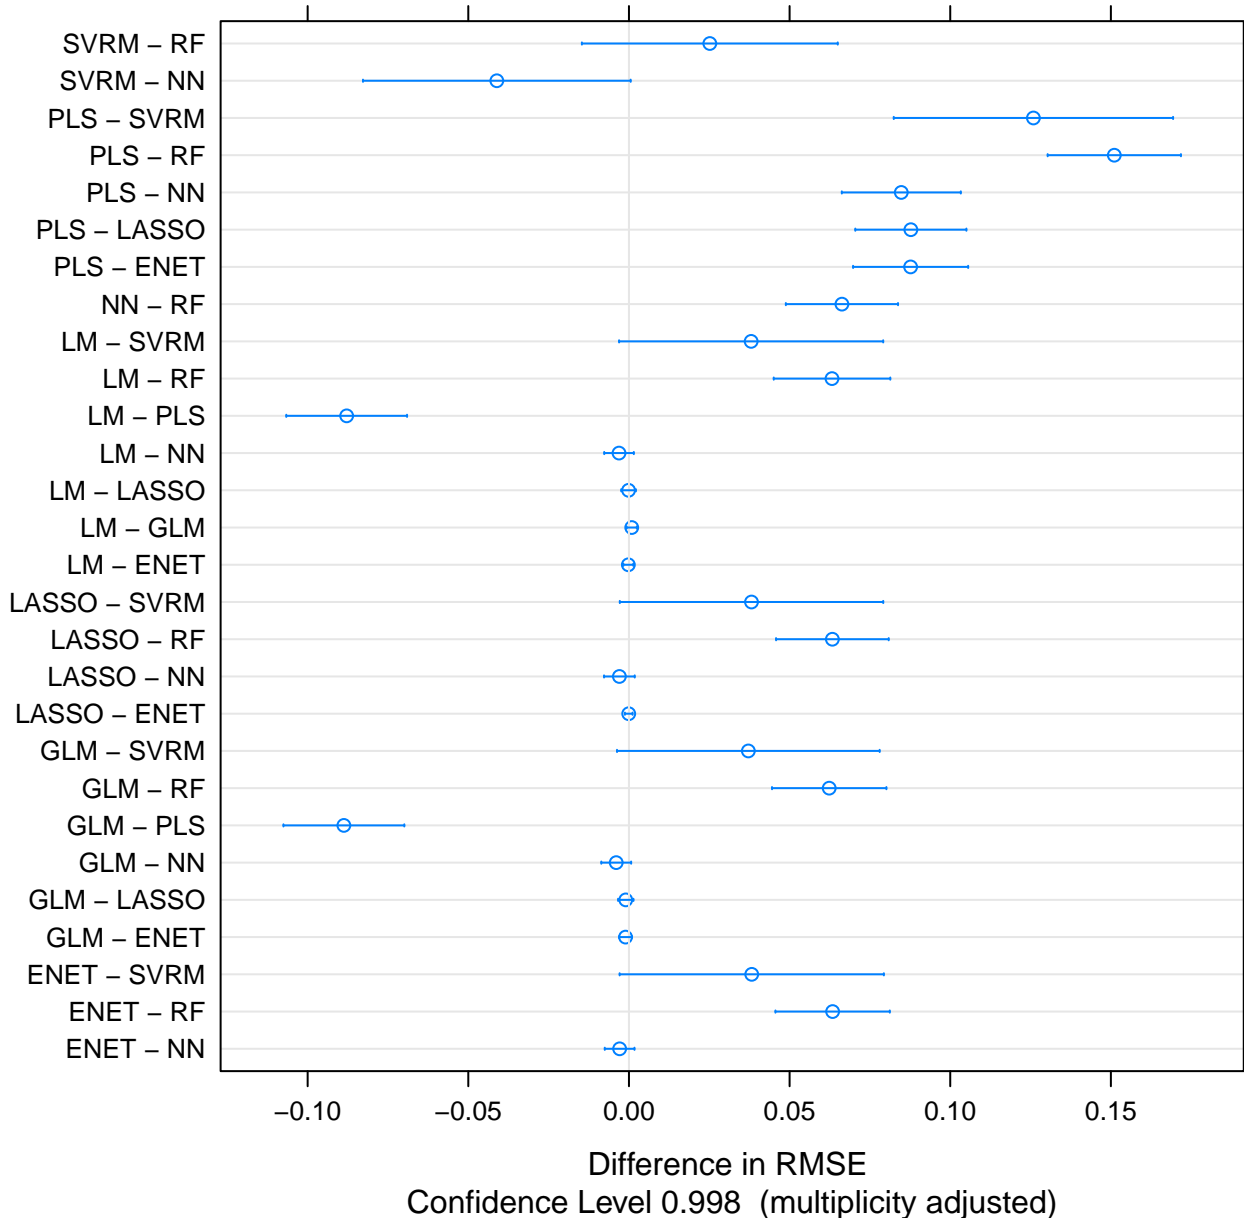

Supplement: rawData.zip [file rawData.zip]

# Models' differences on the training set (data split 7)

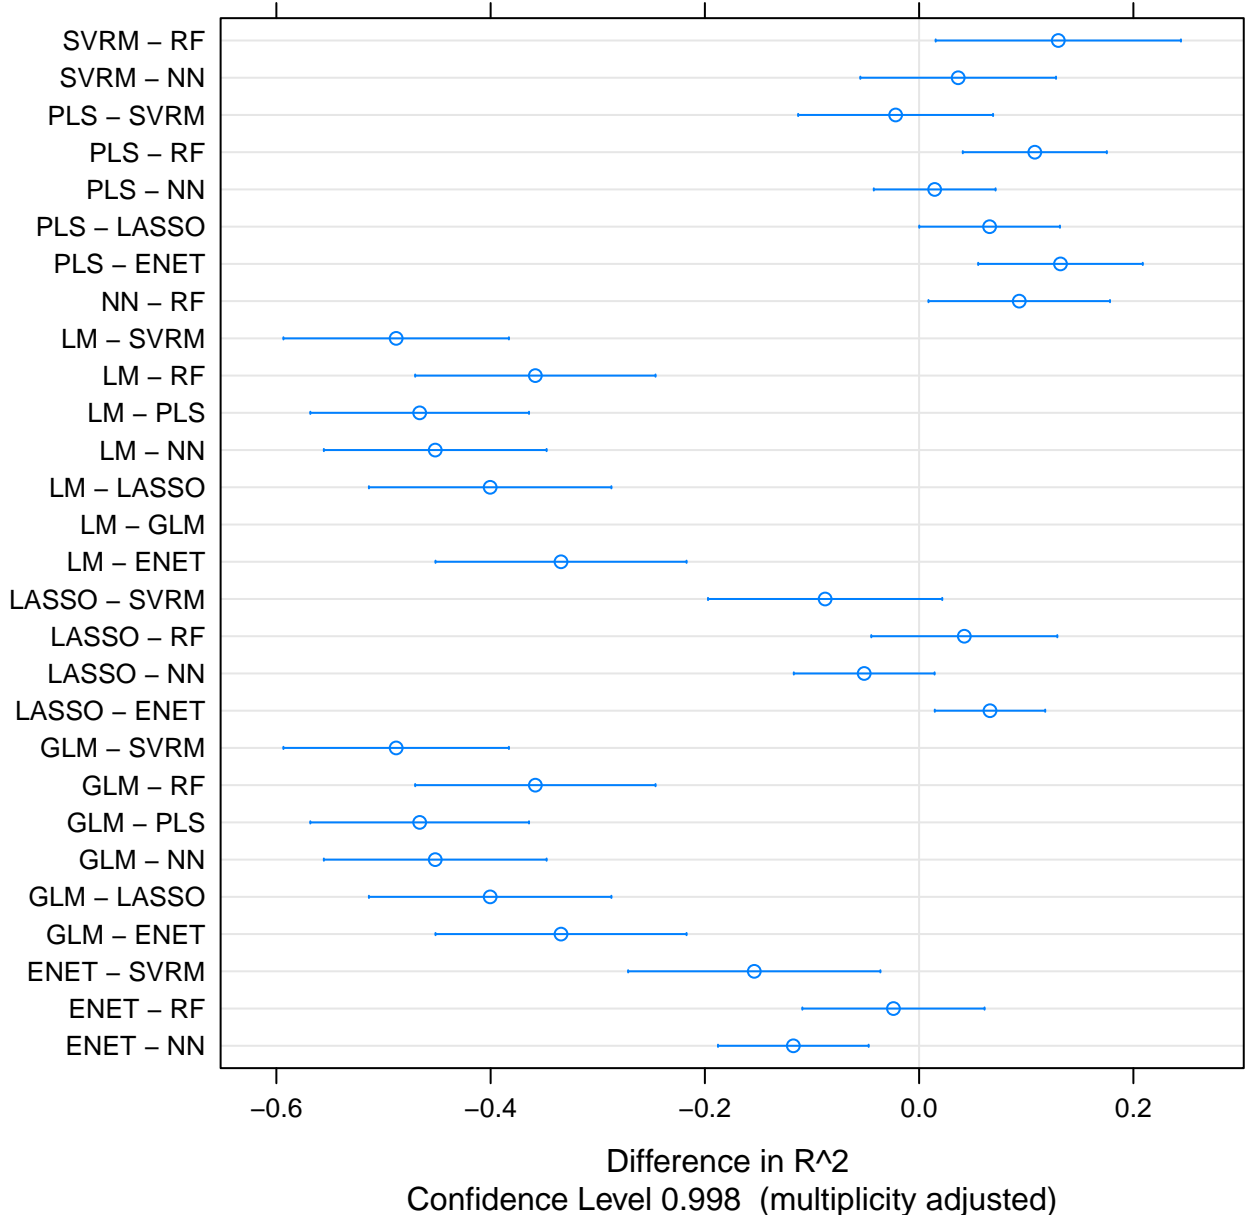

Supplement: rawData.zip [file rawData.zip]

# Models' differences on the training set (data split 1)

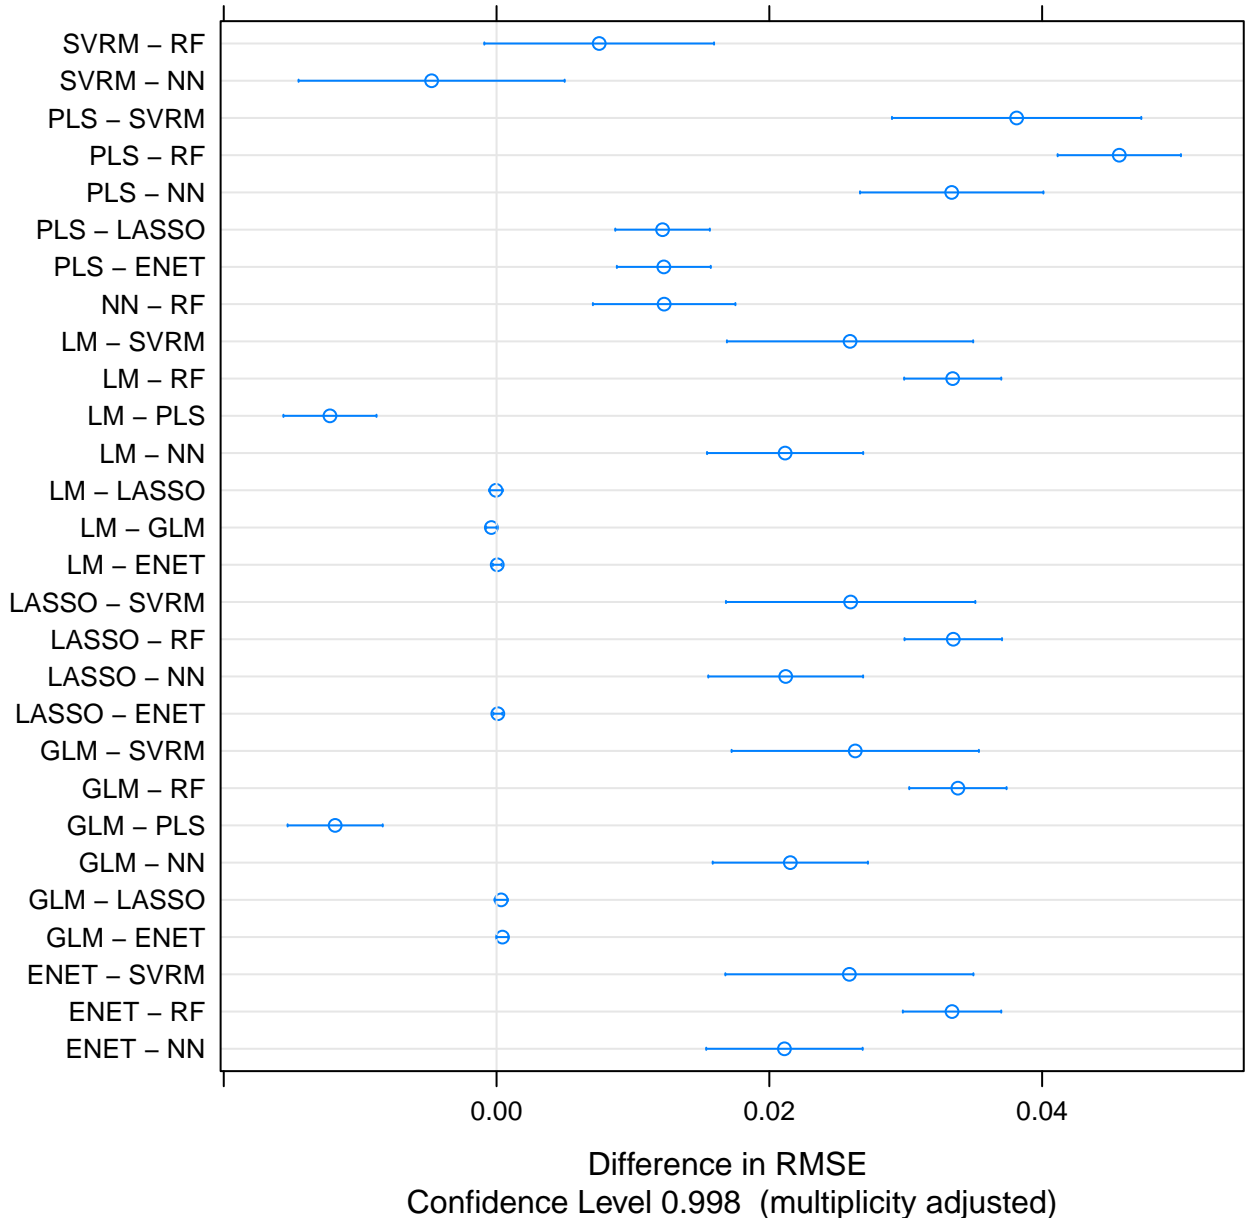

Supplement: rawData.zip [file rawData.zip]

# Resampling results on the training set (data split 5)

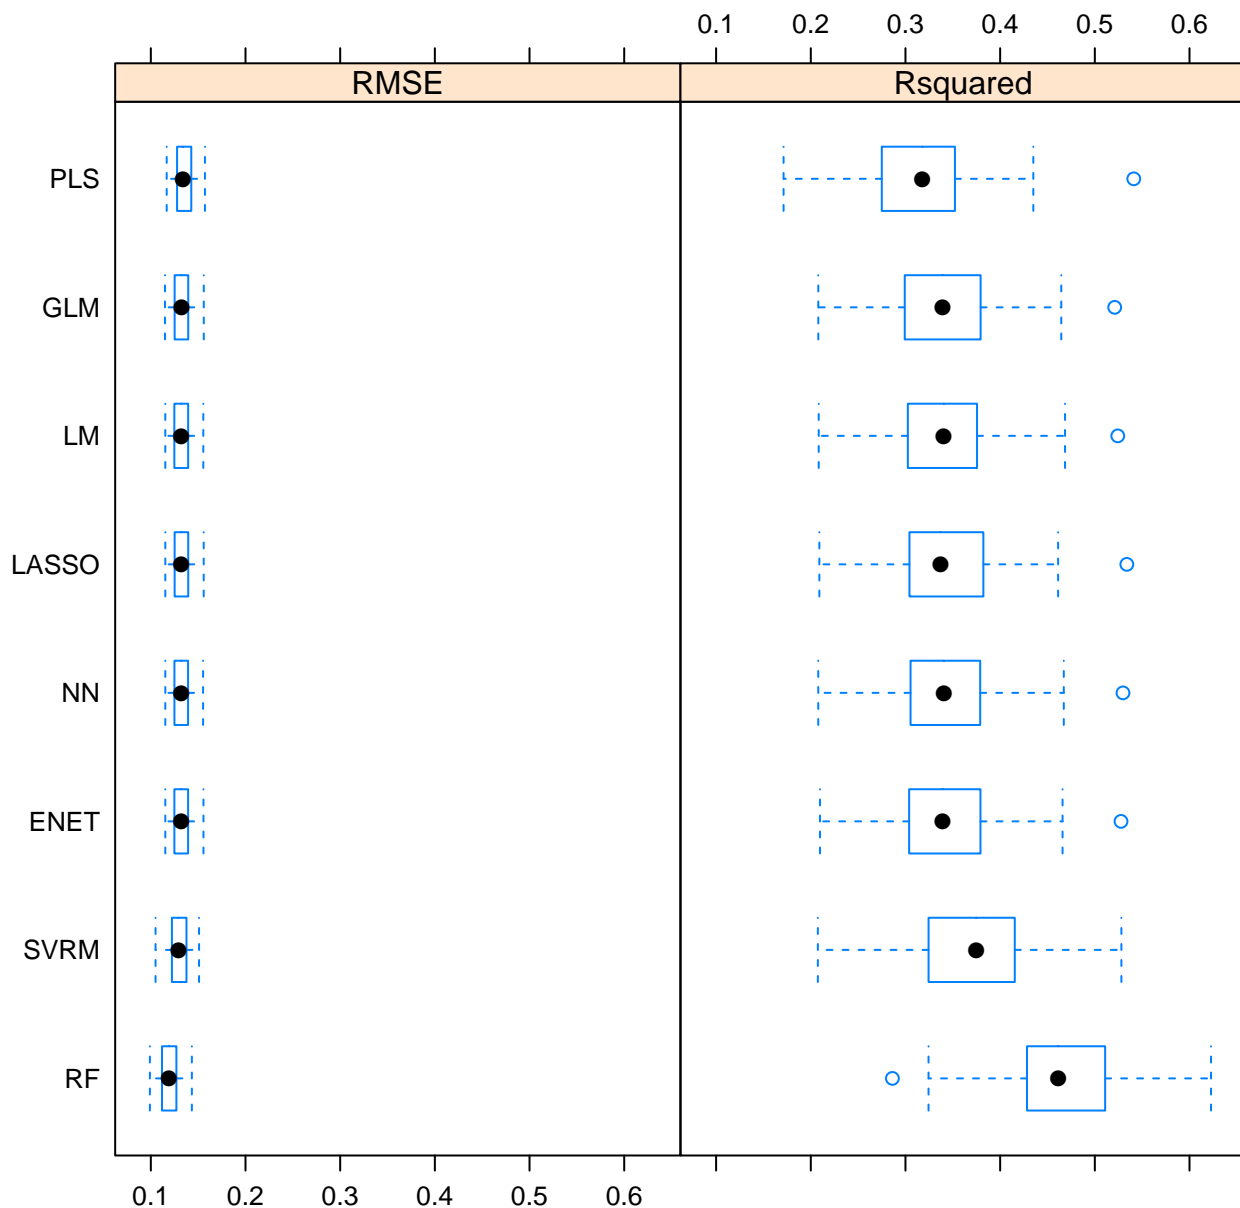

Supplement: rawData.zip [file rawData.zip]

# Resampling results on the training set (data split 5)

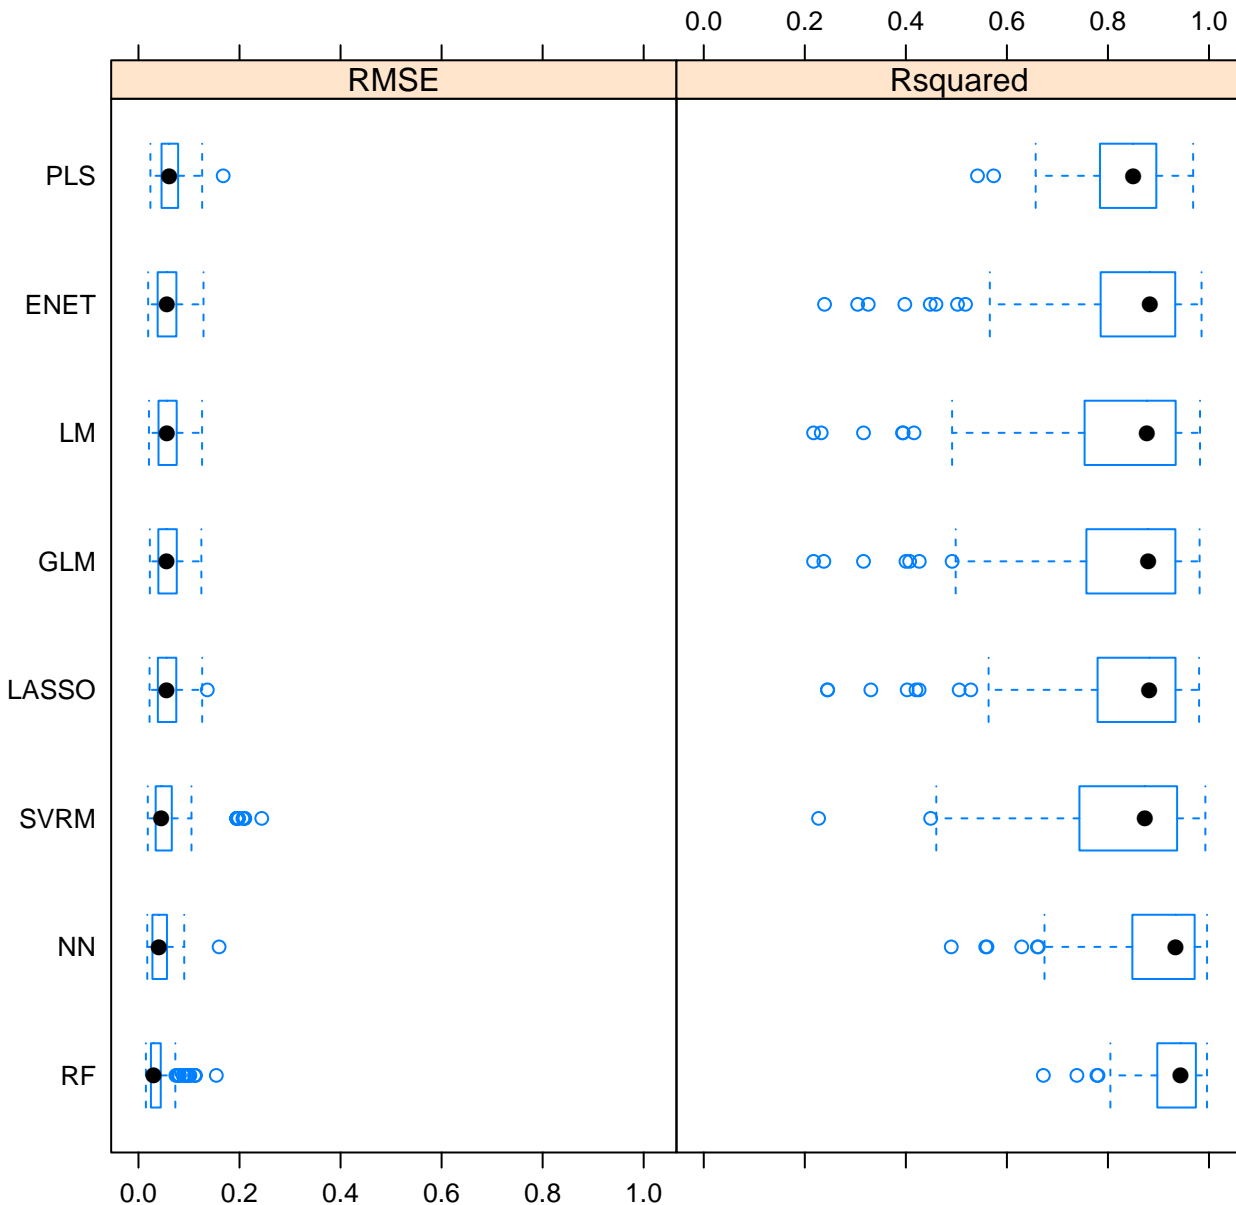

Supplement: rawData.zip [file rawData.zip]

# Resampling results on the training set (data split 4)

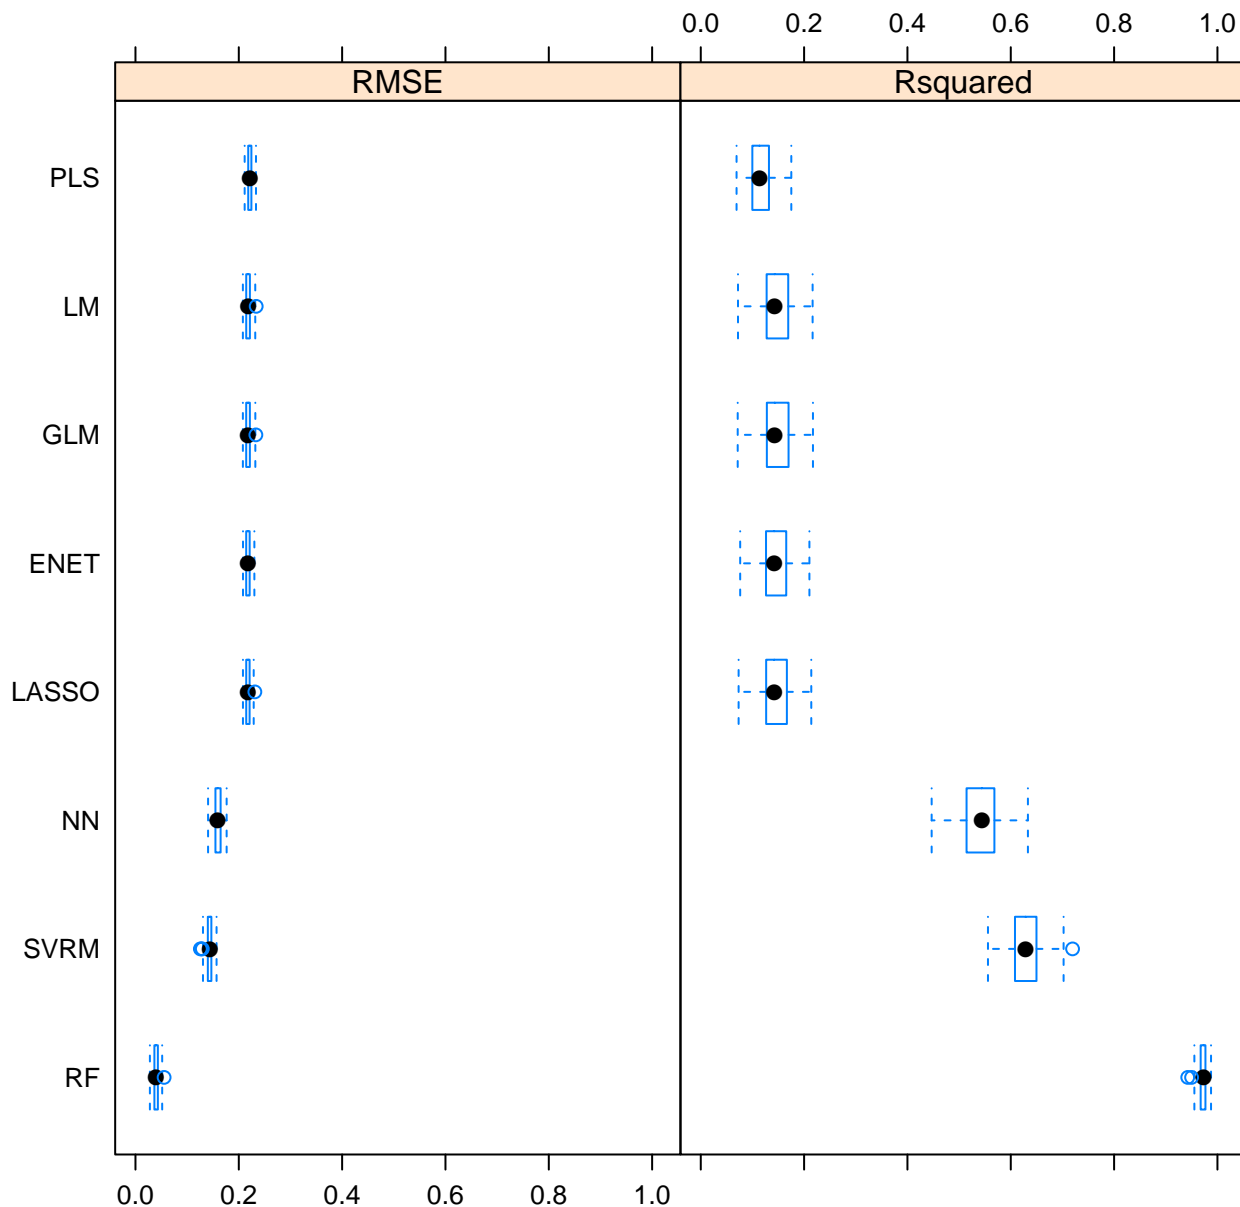

Supplement: rawData.zip [file rawData.zip]

# Models' differences on the training set (data split 4)

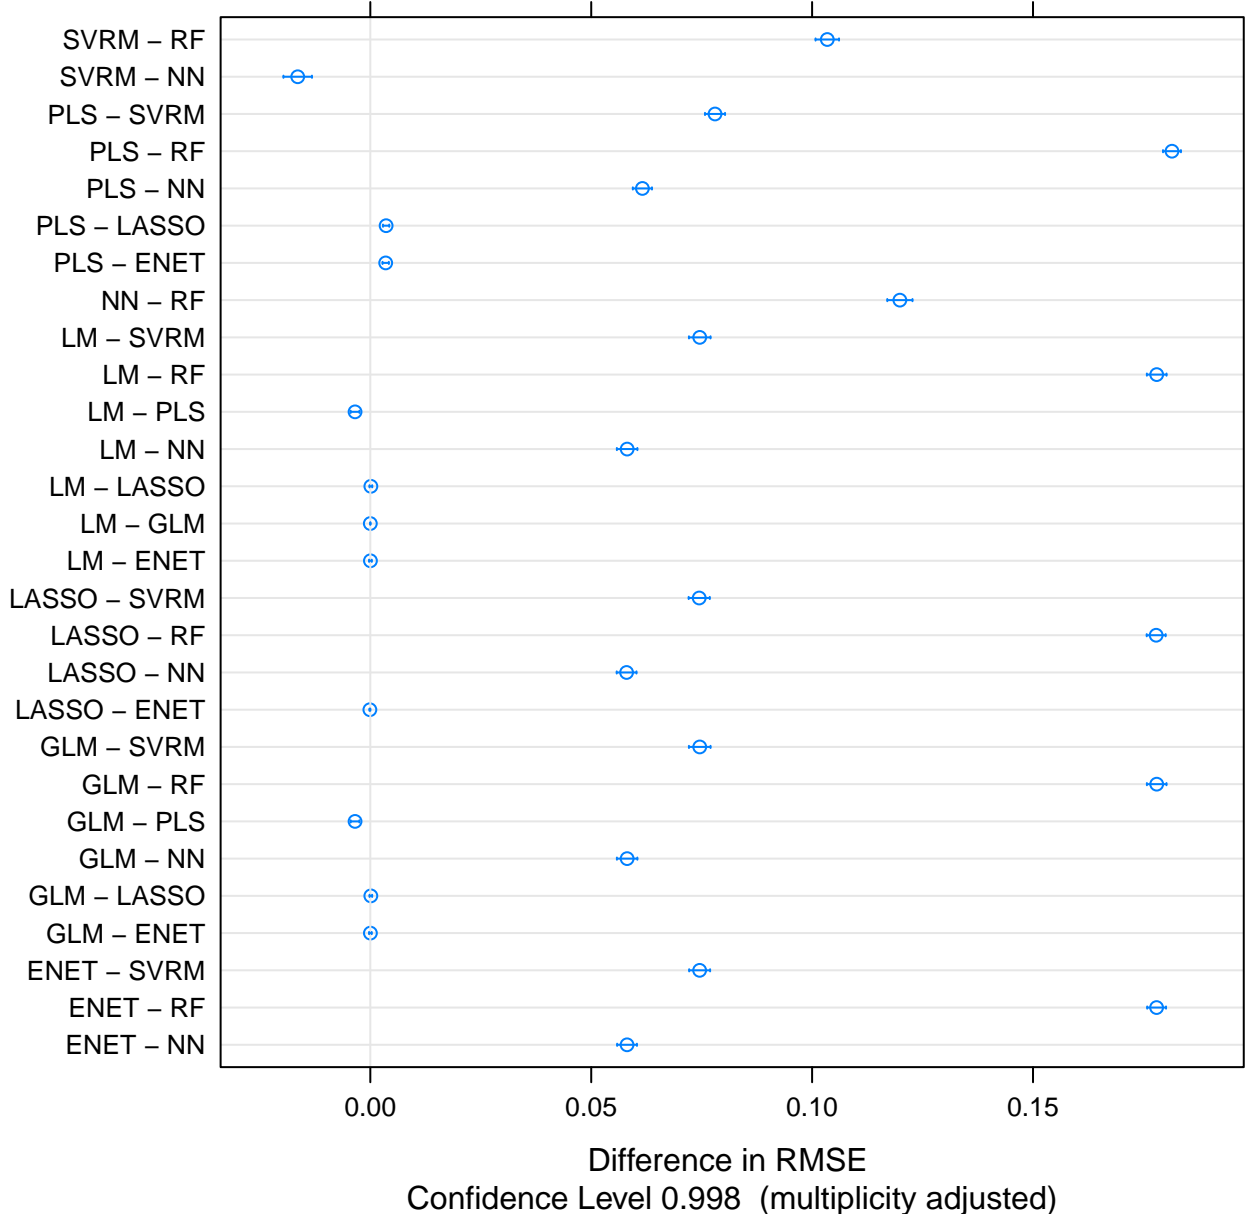

Supplement: rawData.zip [file rawData.zip]

# Resampling results on the training set (data split 10)

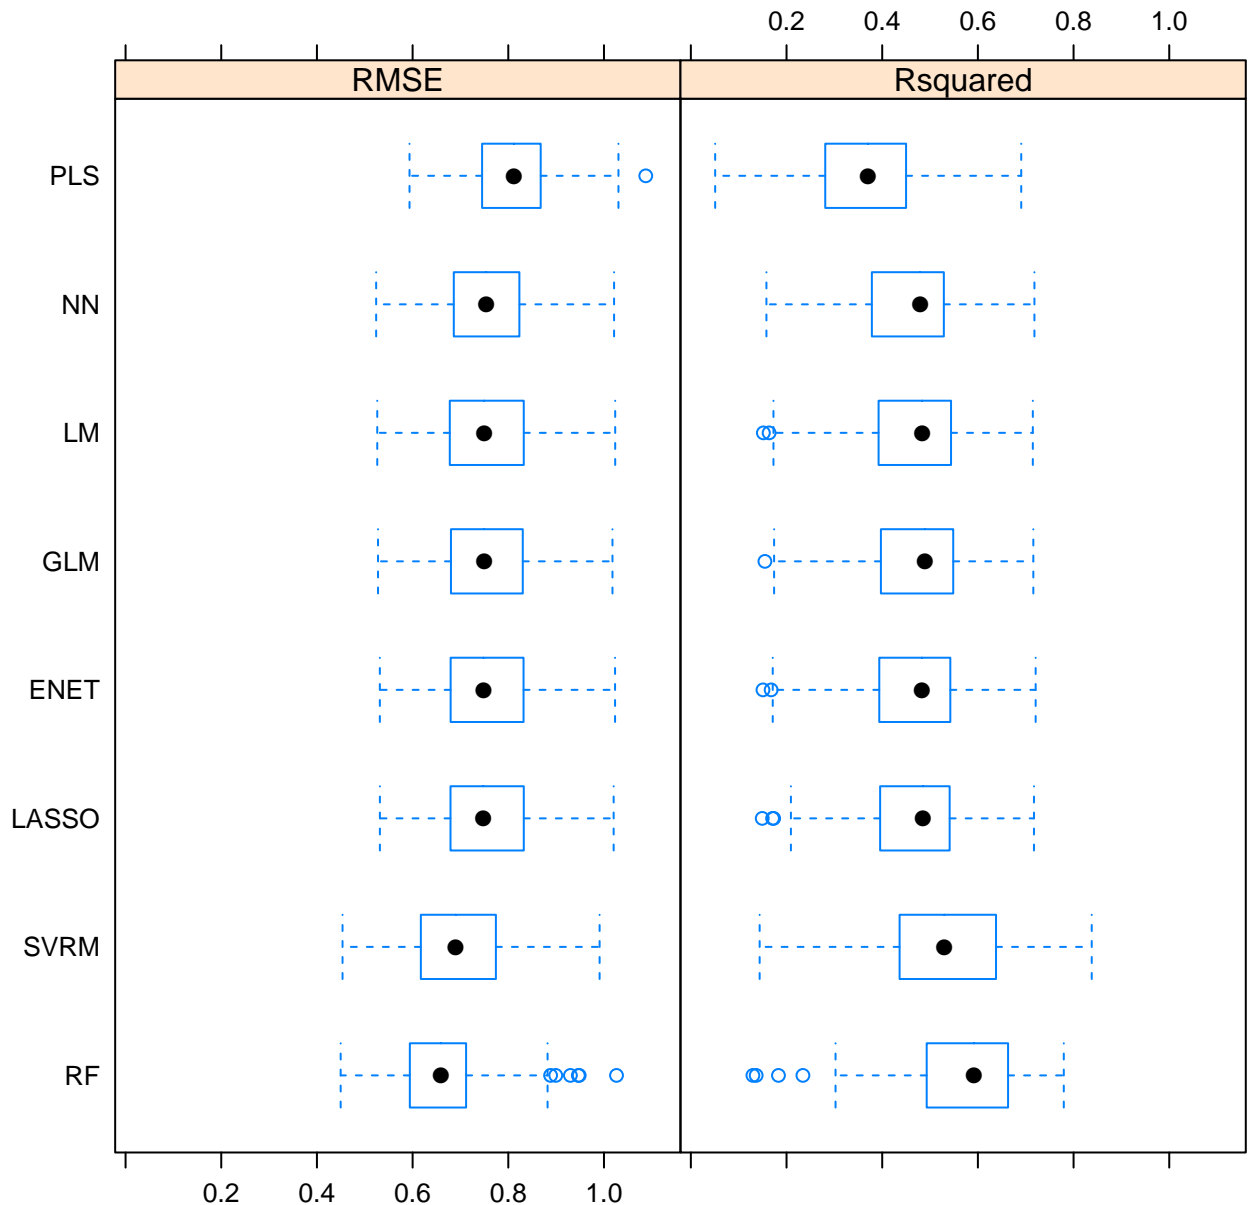

Supplement: rawData.zip [file rawData.zip]

# Models' differences on the training set (data split 10)

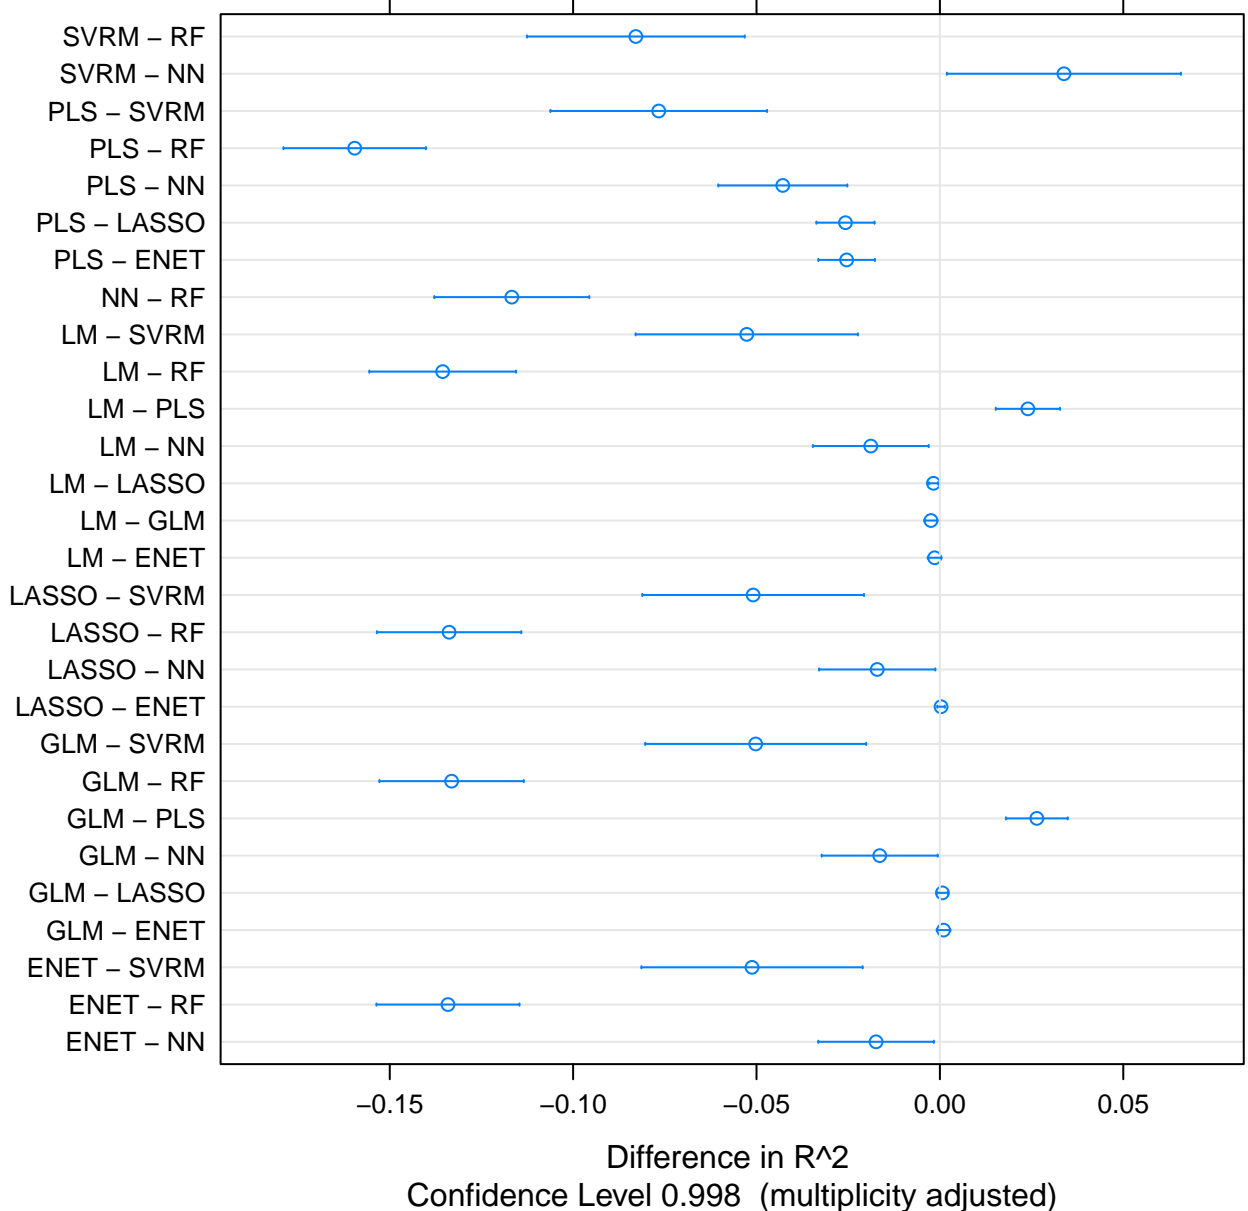

Supplement: rawData.zip [file rawData.zip]

# Models' differences on the training set (data split 5)

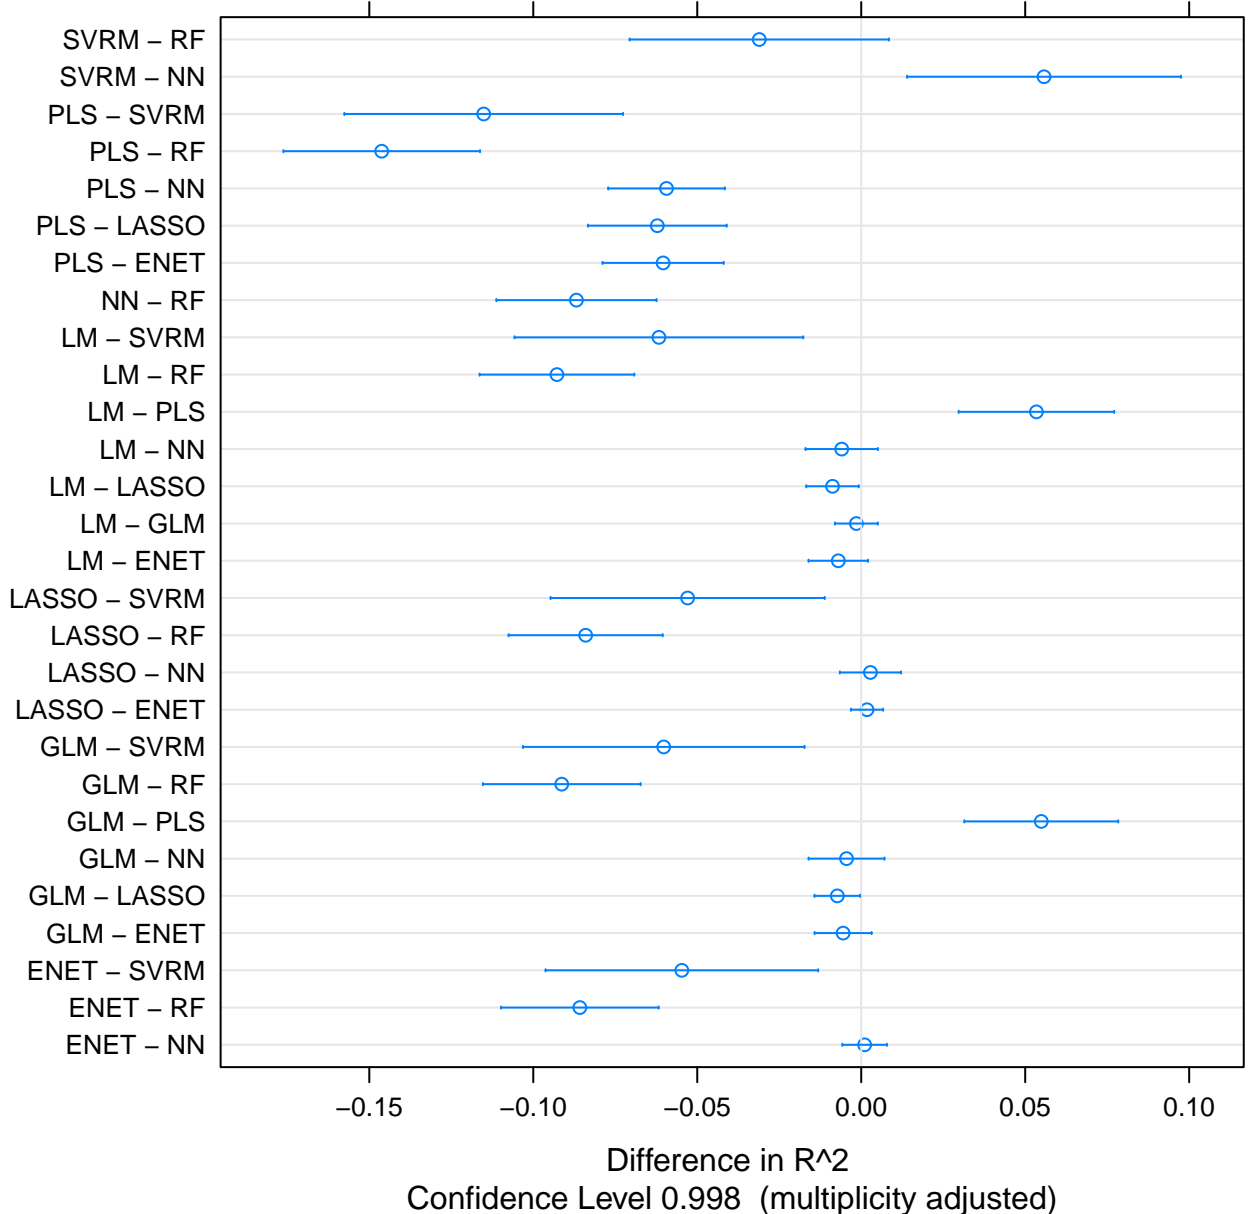

Supplement: rawData.zip [file rawData.zip]

# Models' differences on the training set (data split 3)

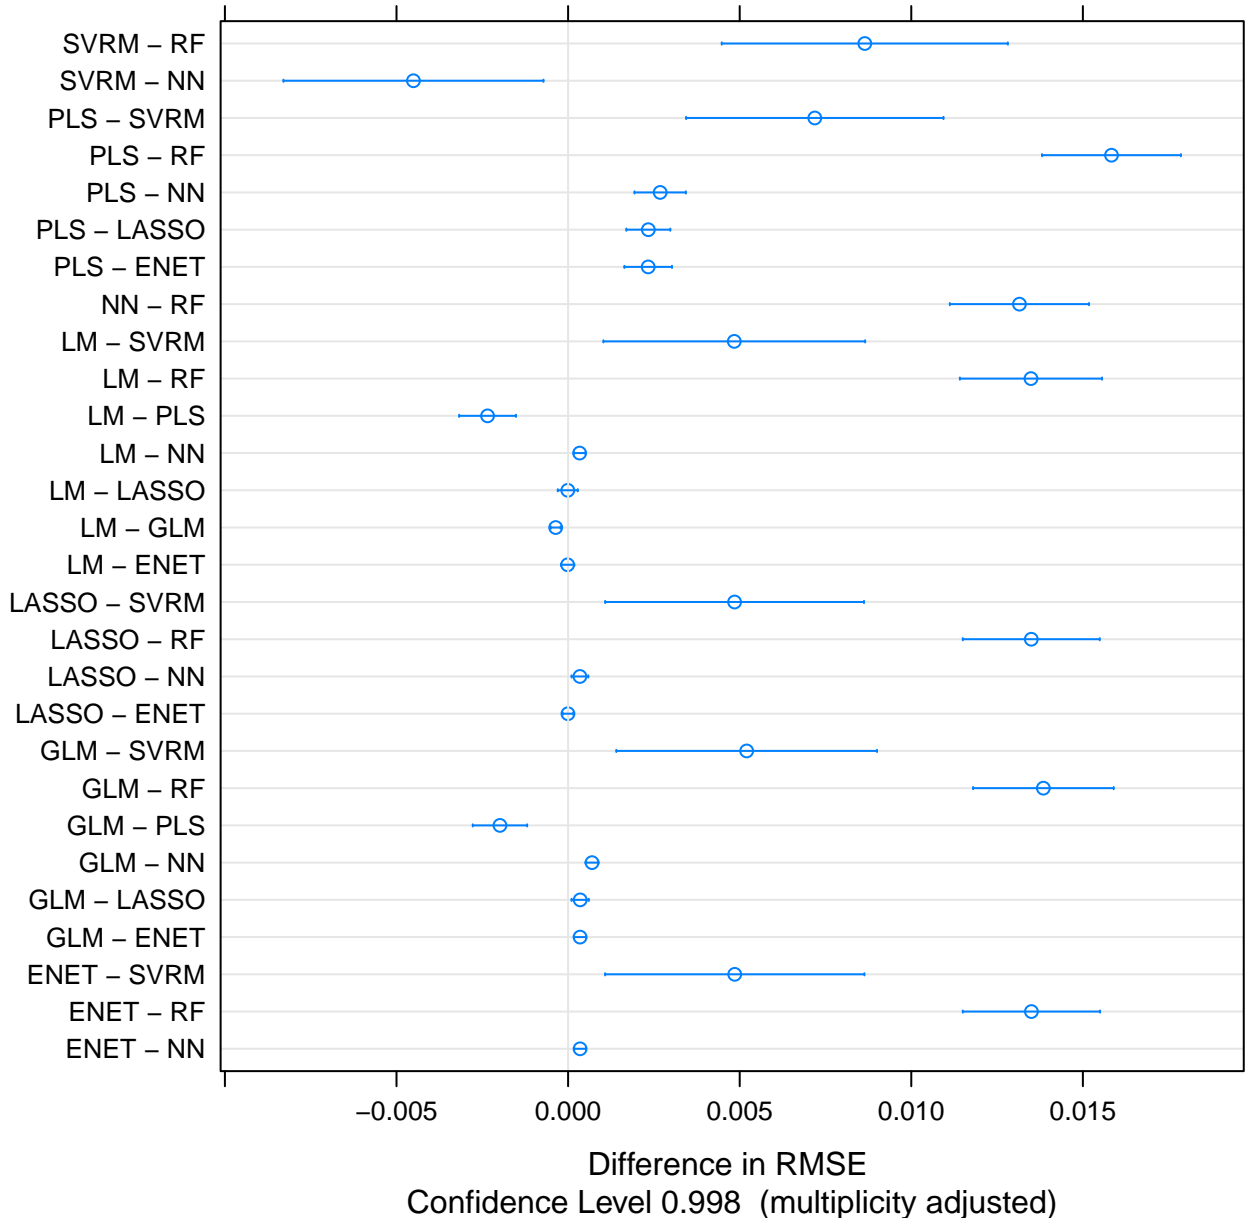

Supplement: rawData.zip [file rawData.zip]

# Resampling results on the training set (data split 5)

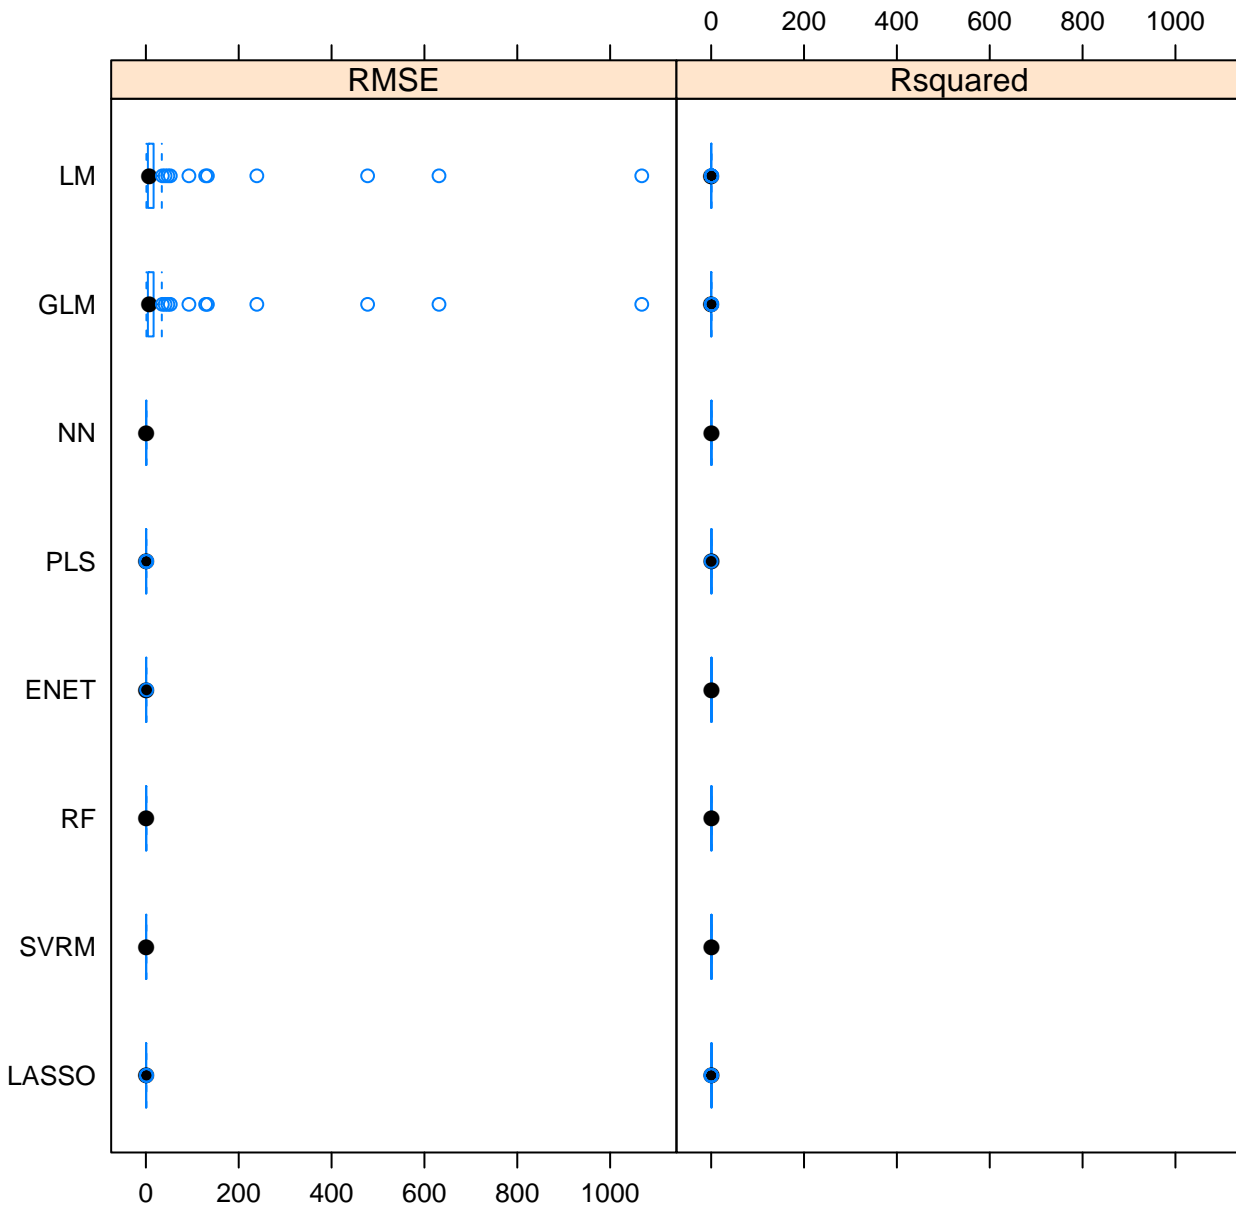

Supplement: rawData.zip [file rawData.zip]

# Resampling results on the training set (data split 9)

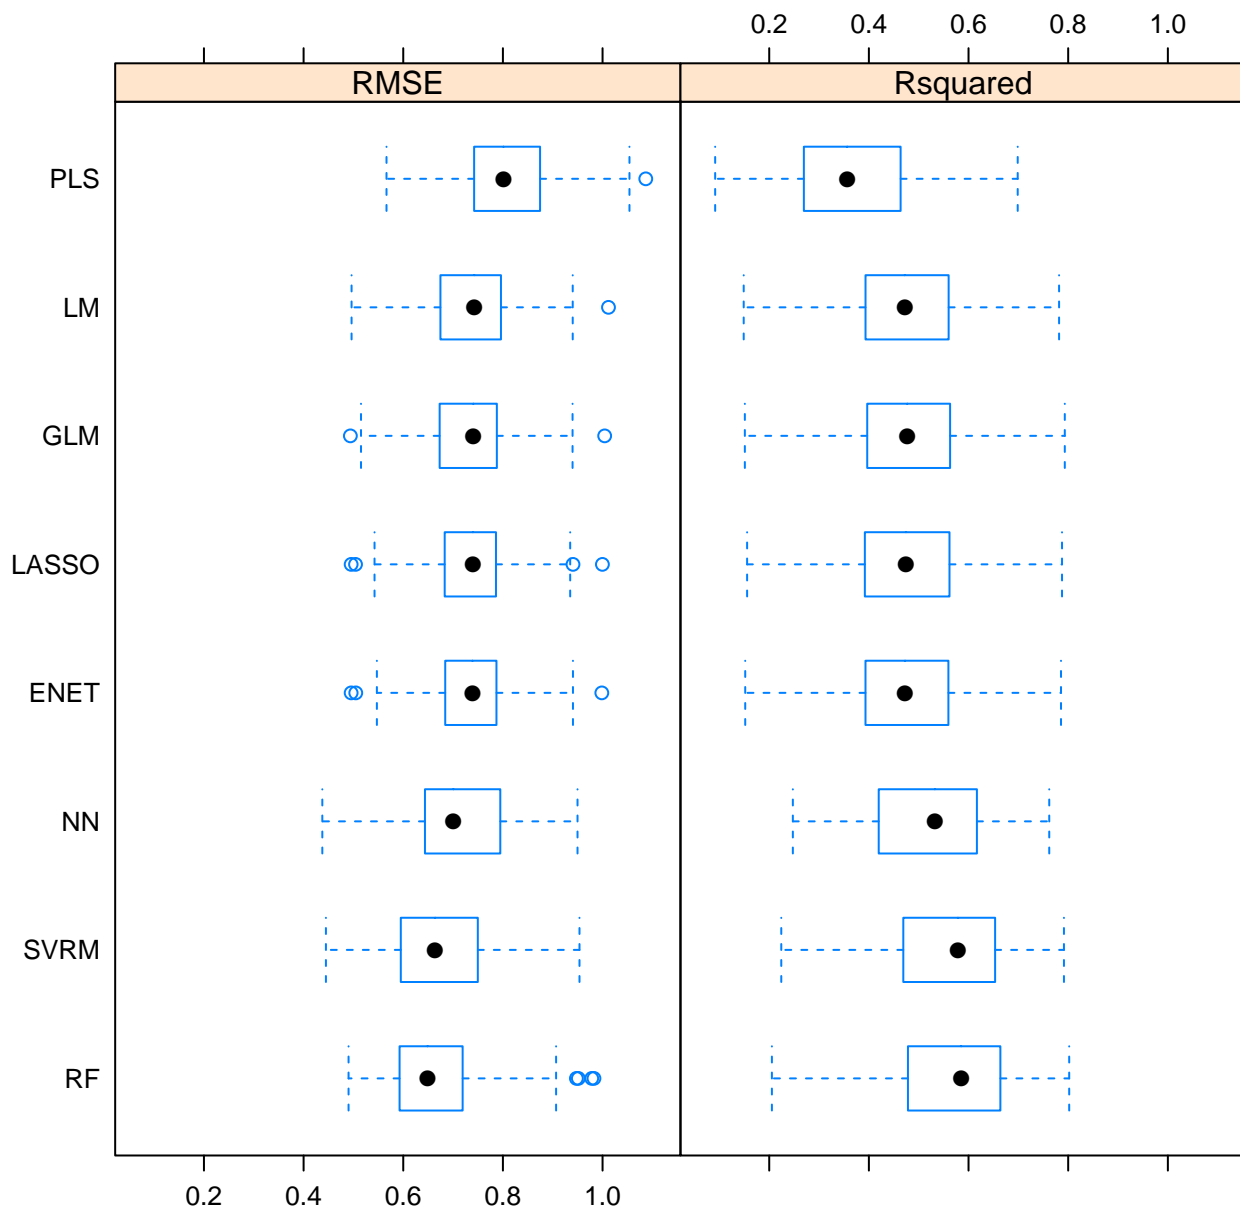

Supplement: rawData.zip [file rawData.zip]

Train Yobs-Ypred

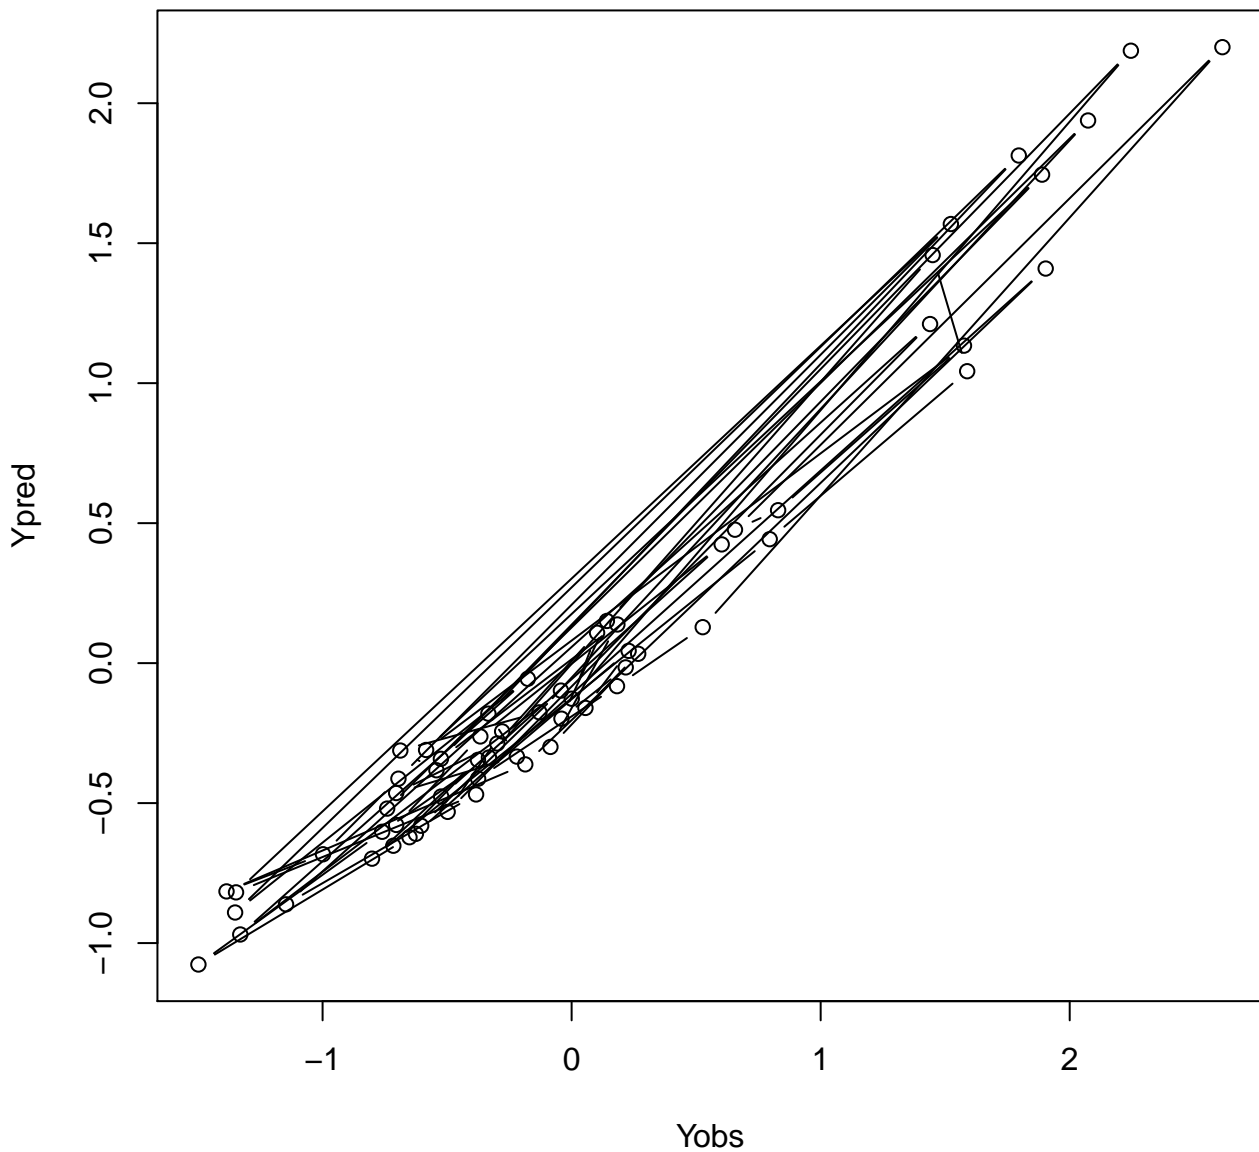

# Test Yobs-Ypred

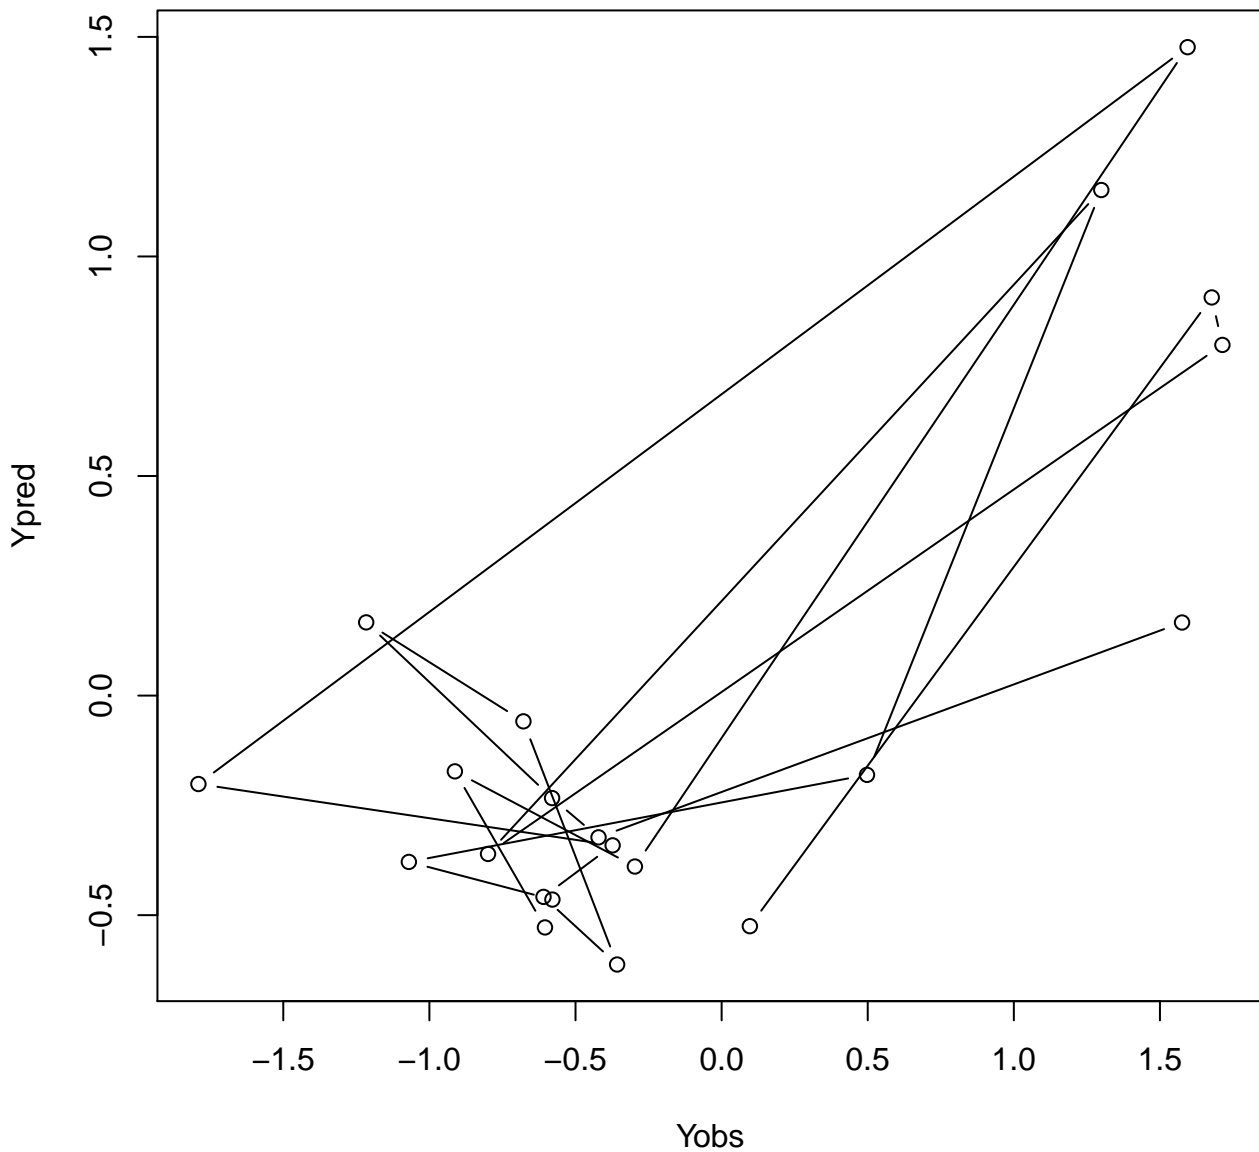

## Feature Importance

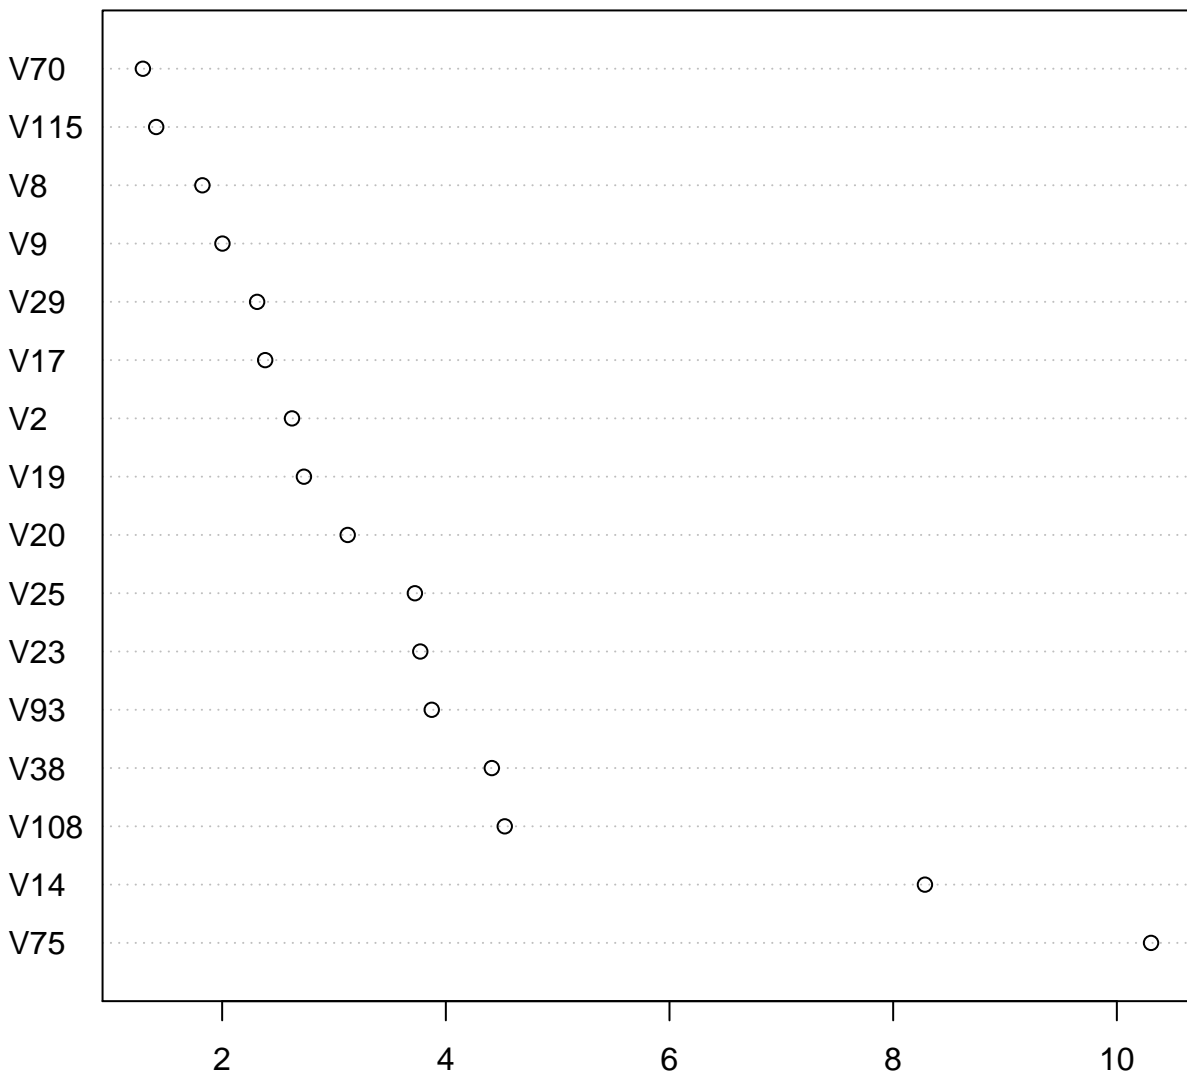

**Fitted vs. Residuals for Fitted Model**

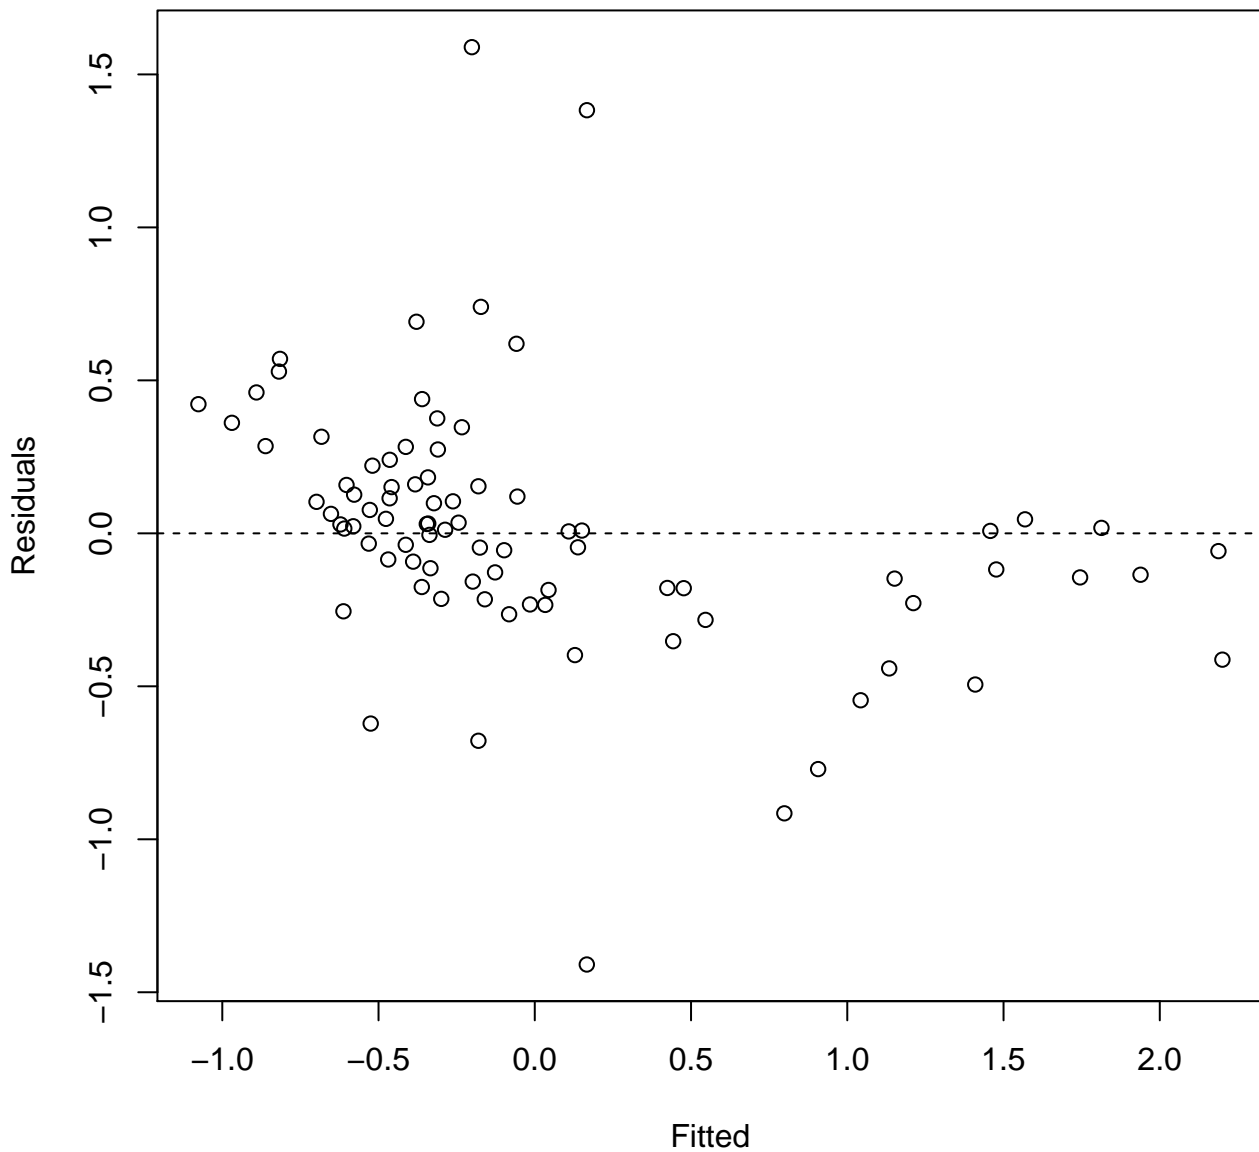

Supplement: rawData.zip [file rawData.zip]

# Models' differences on the training set (data split 4)

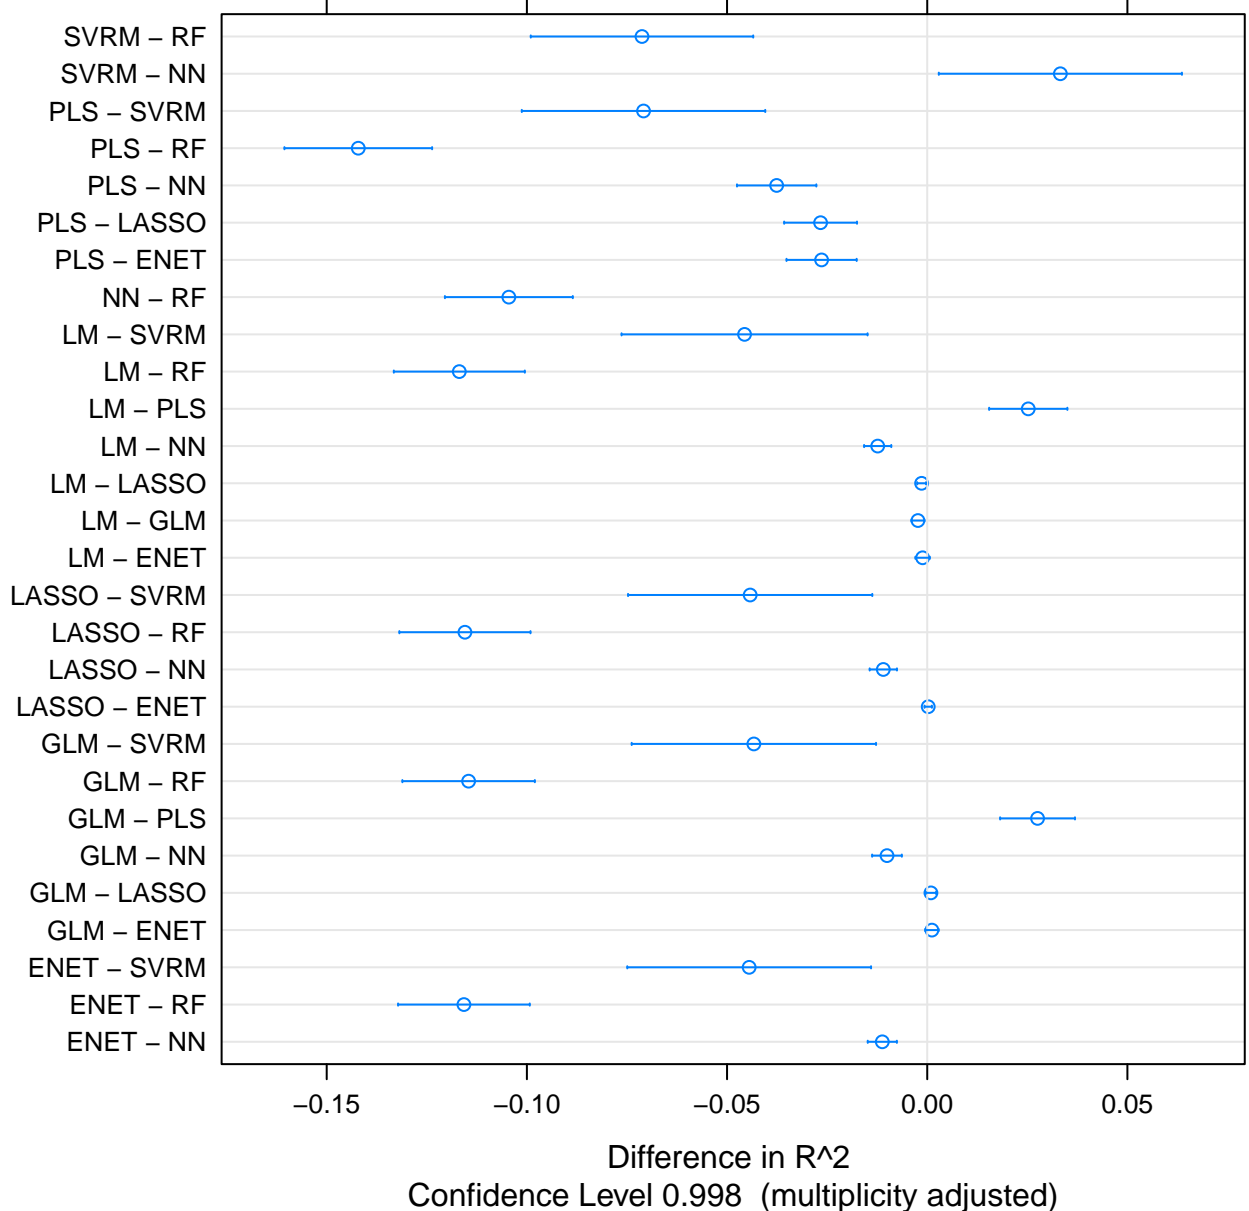

Supplement: rawData.zip [file rawData.zip]

# Models' differences on the training set (data split 2)

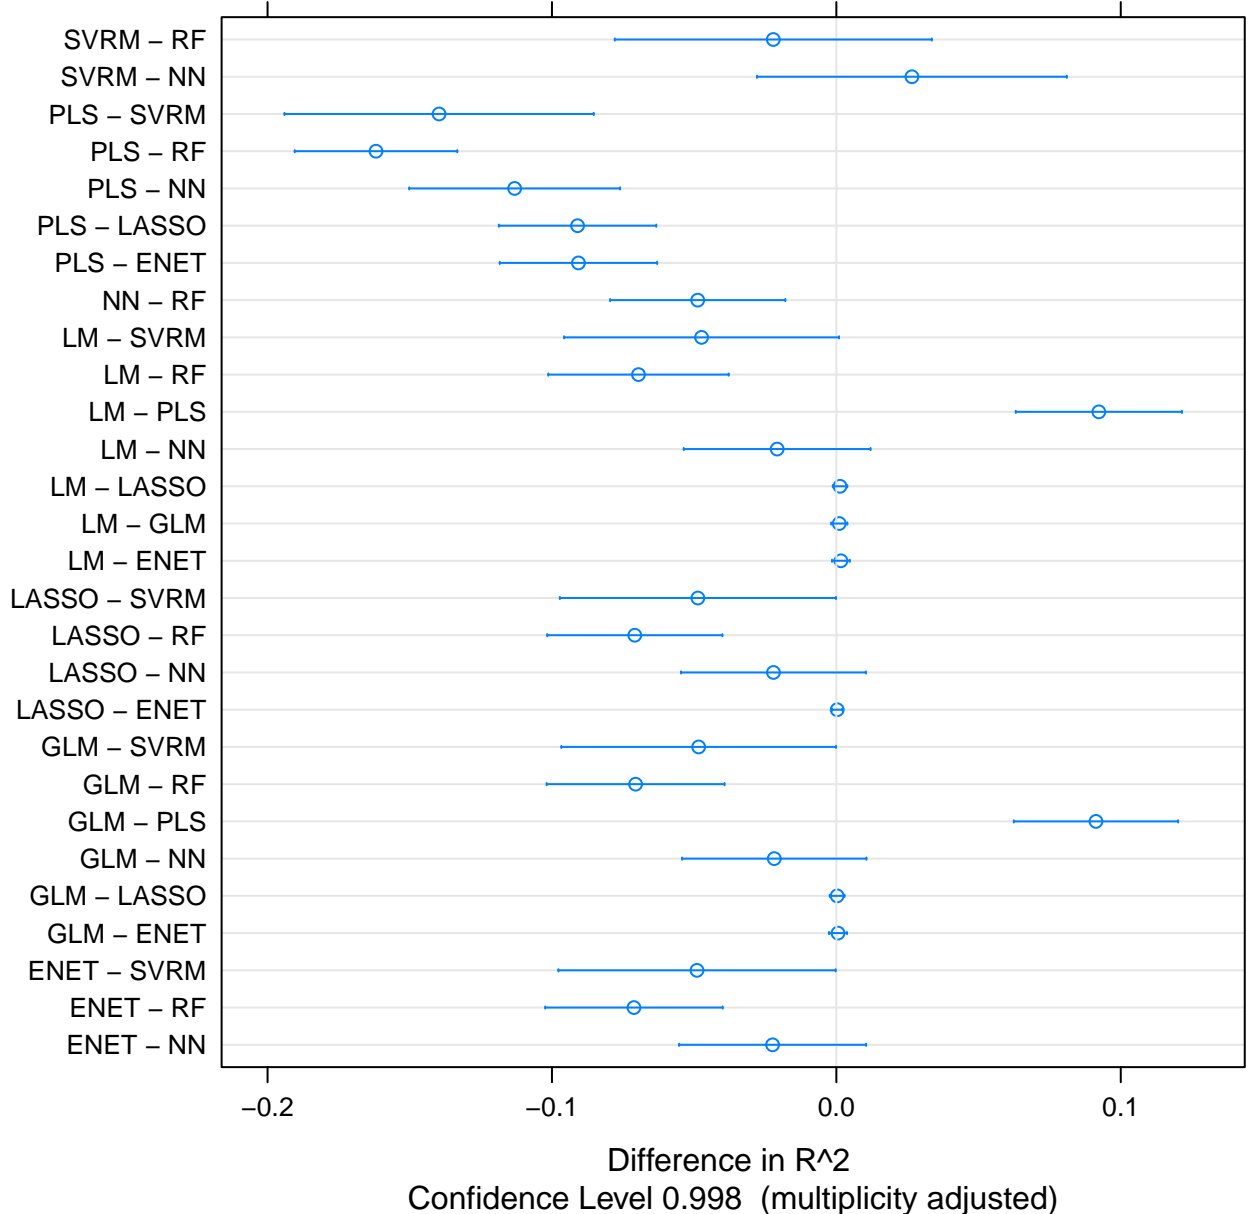

Supplement: rawData.zip [file rawData.zip]

# Resampling results on the training set (data split 1)

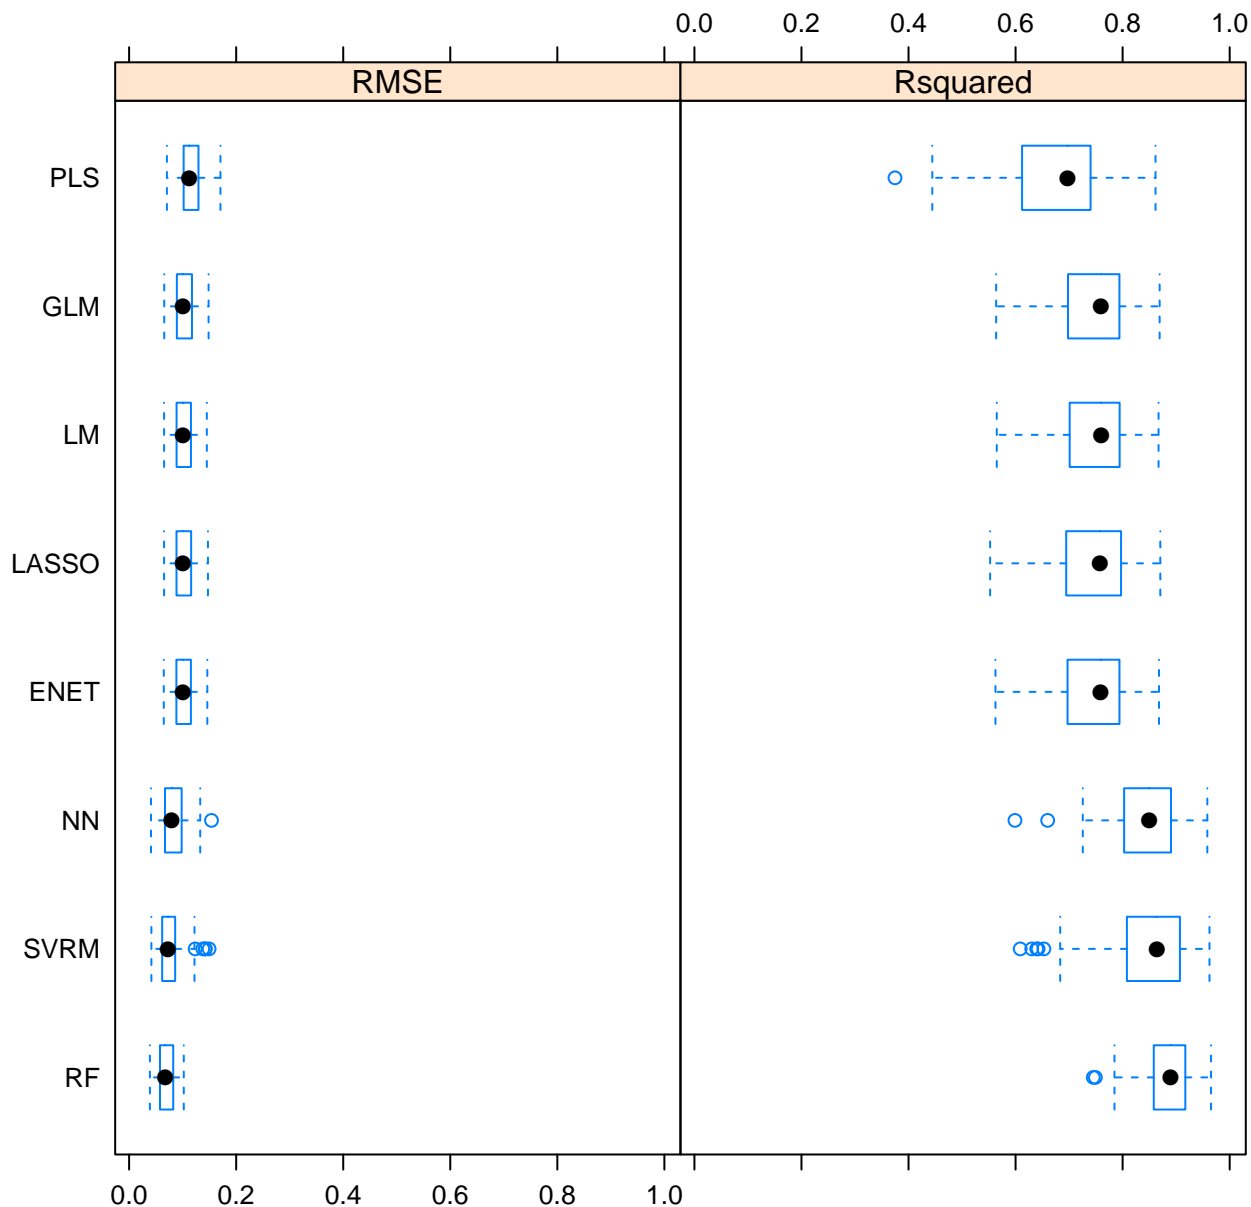

Supplement: rawData.zip [file rawData.zip]

# Models' differences on the training set (data split 2)

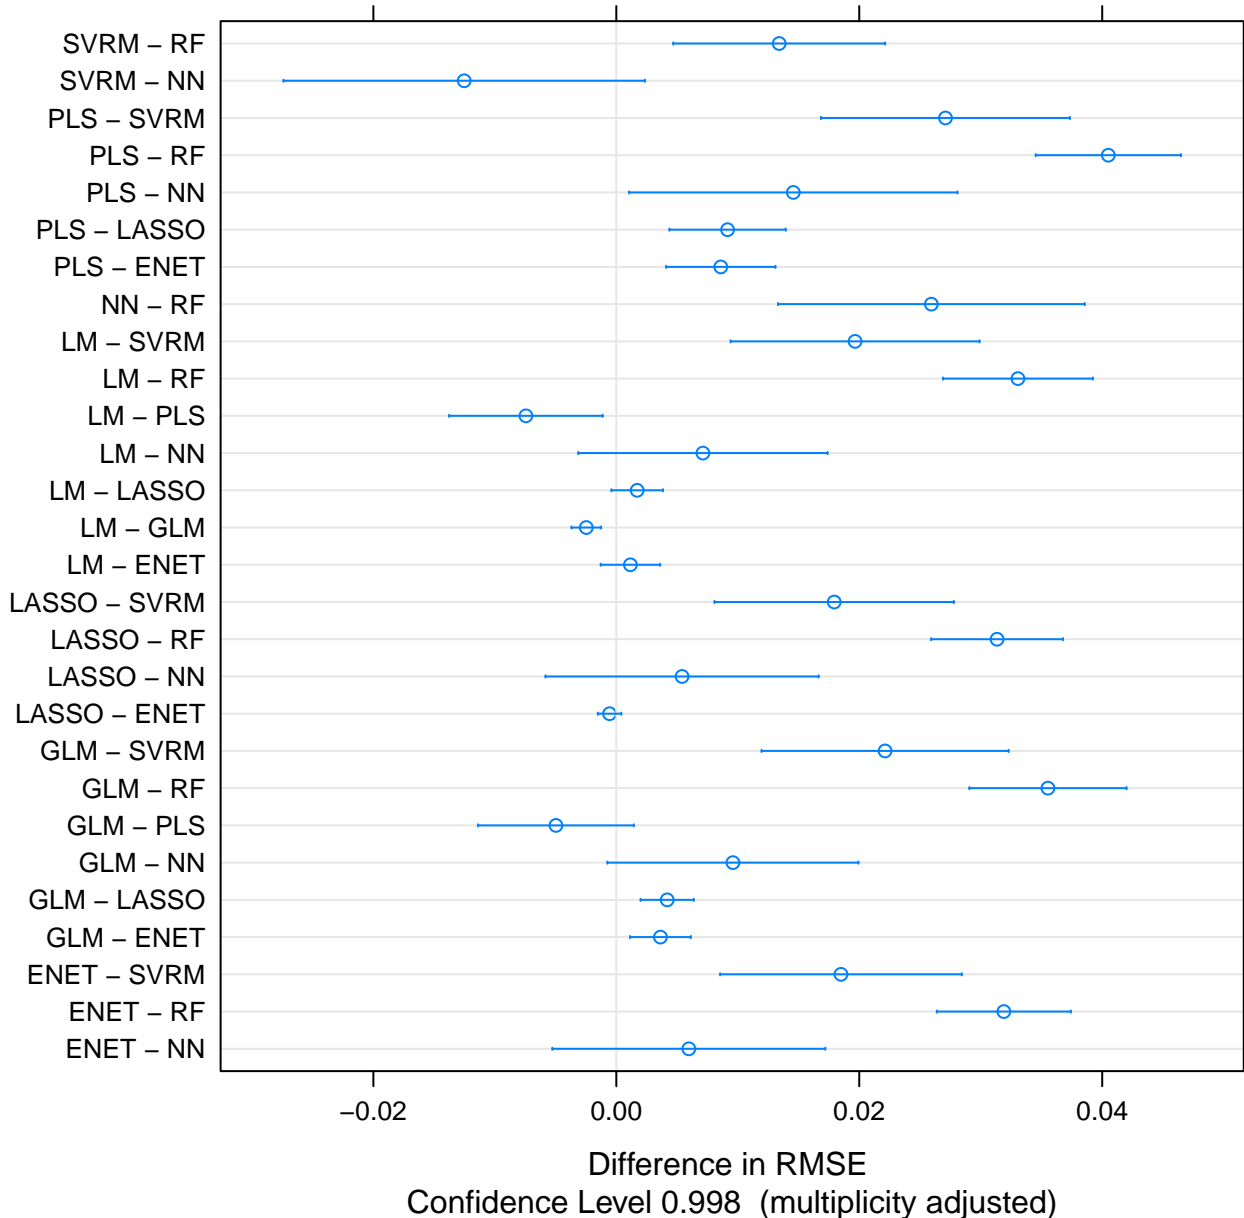

Supplement: rawData.zip [file rawData.zip]

# Resampling results on the training set (data split 4)

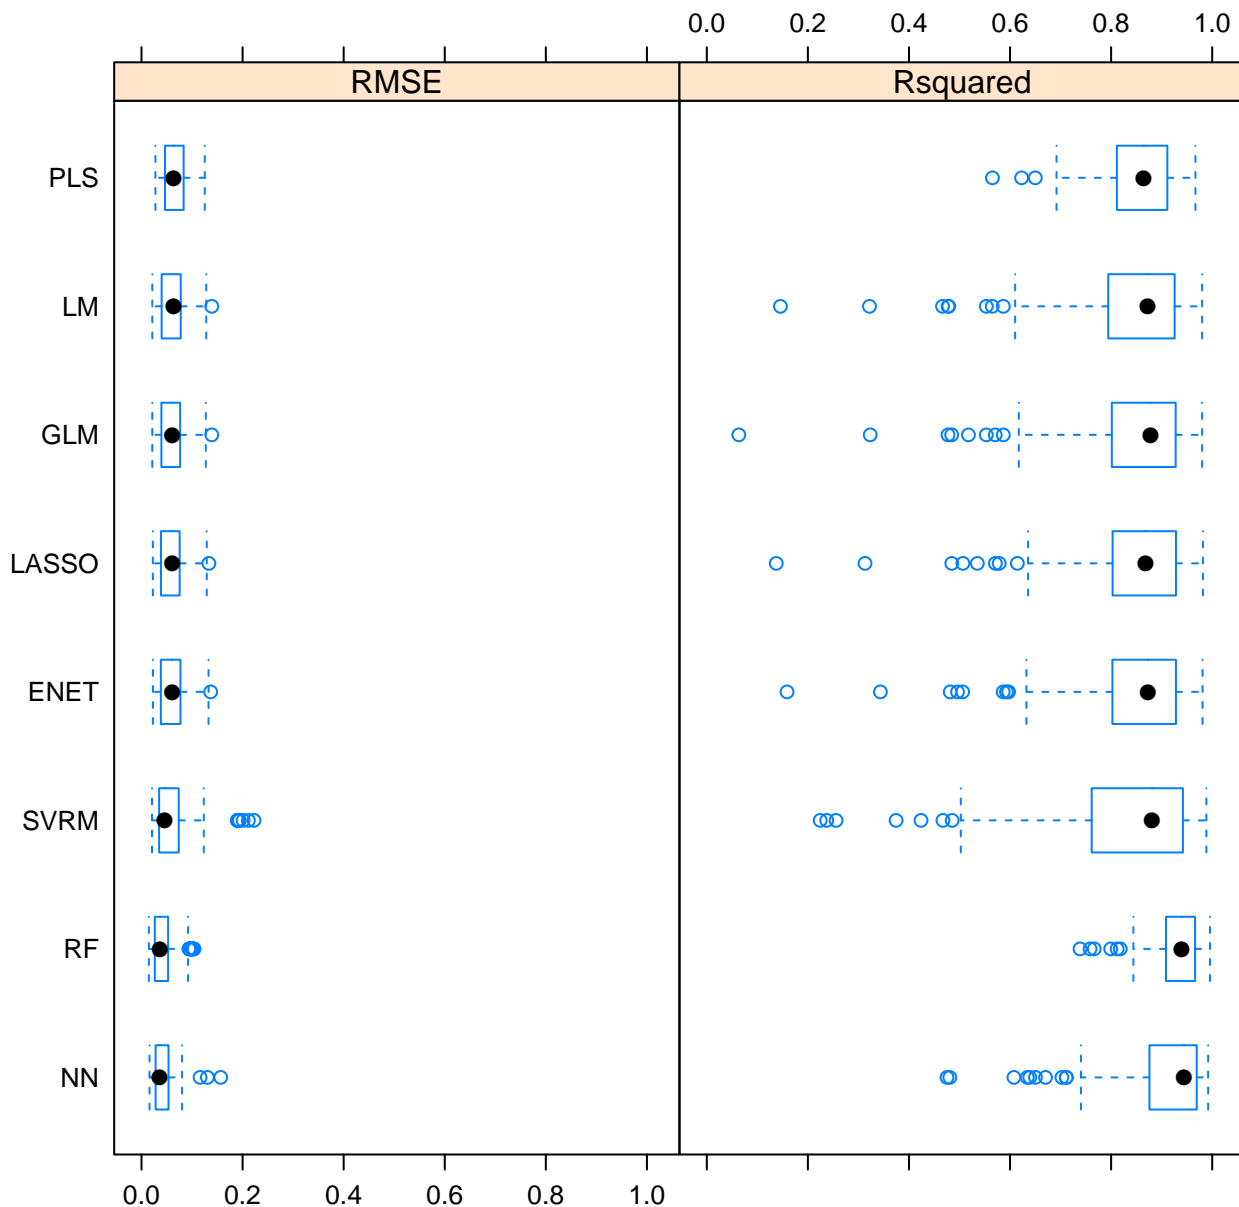

Supplement: rawData.zip [file rawData.zip]

**Train Yobs-Ypred**

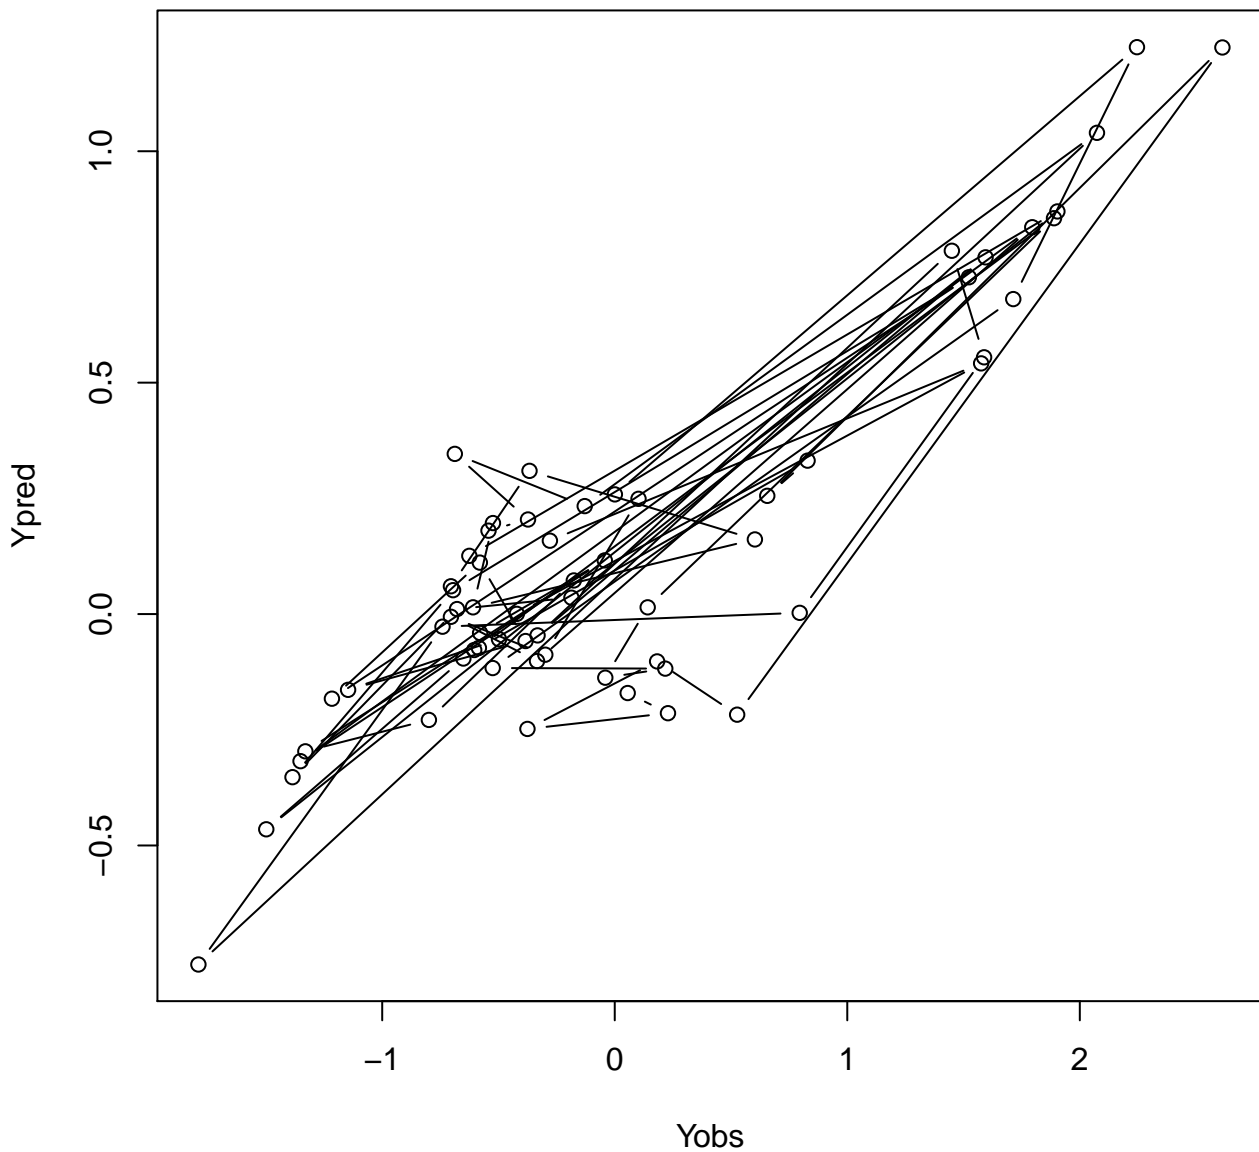

**Test Yobs-Ypred**

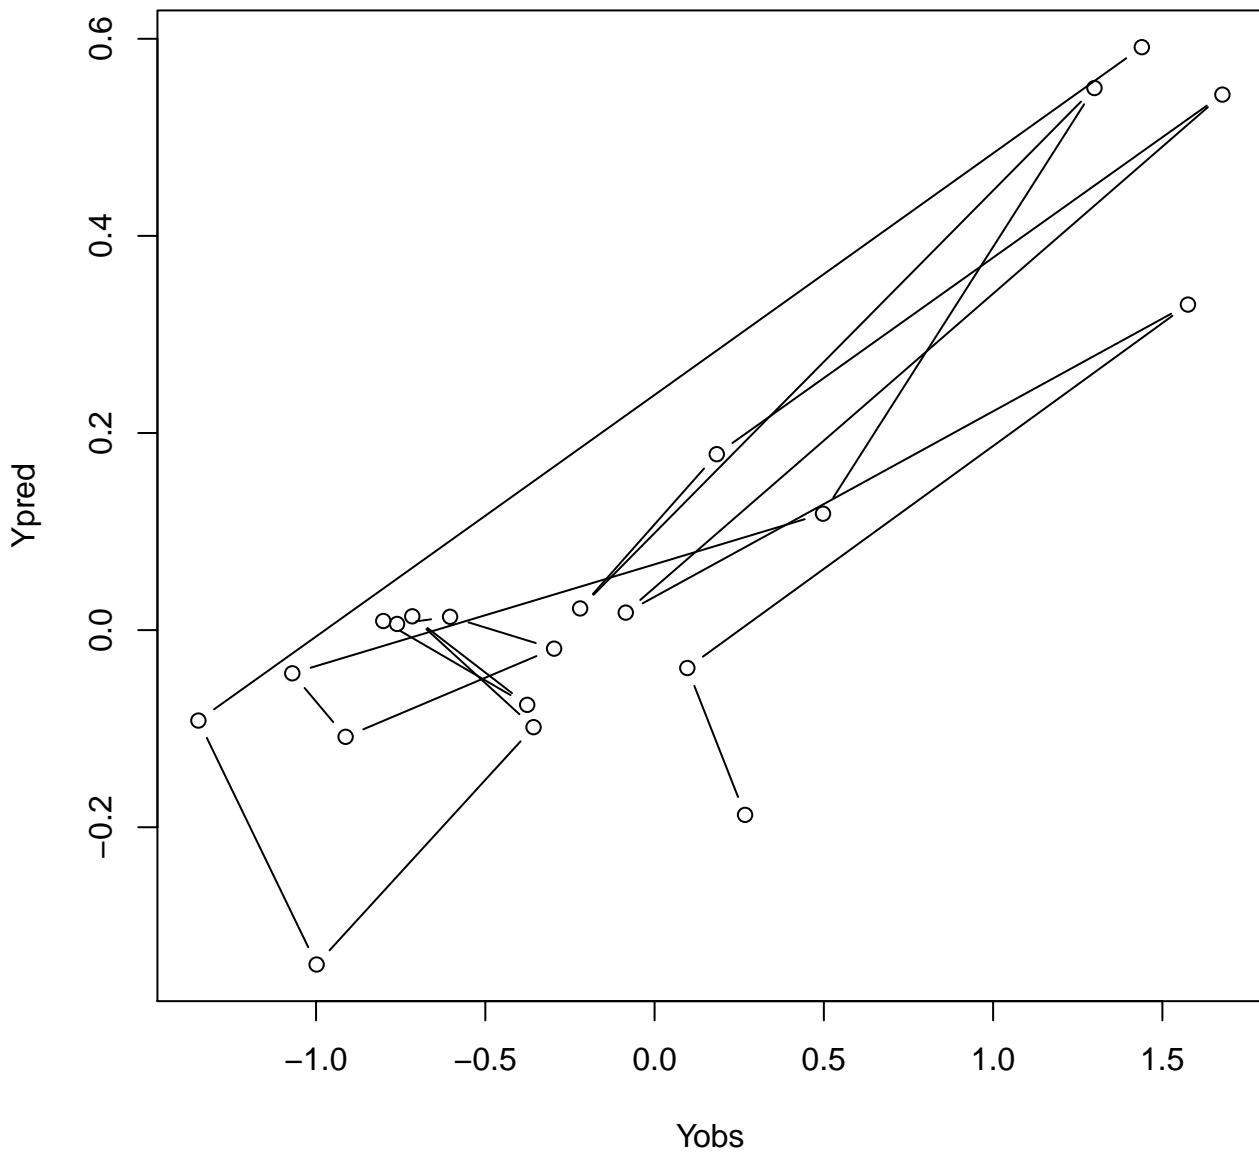

## Feature Importance

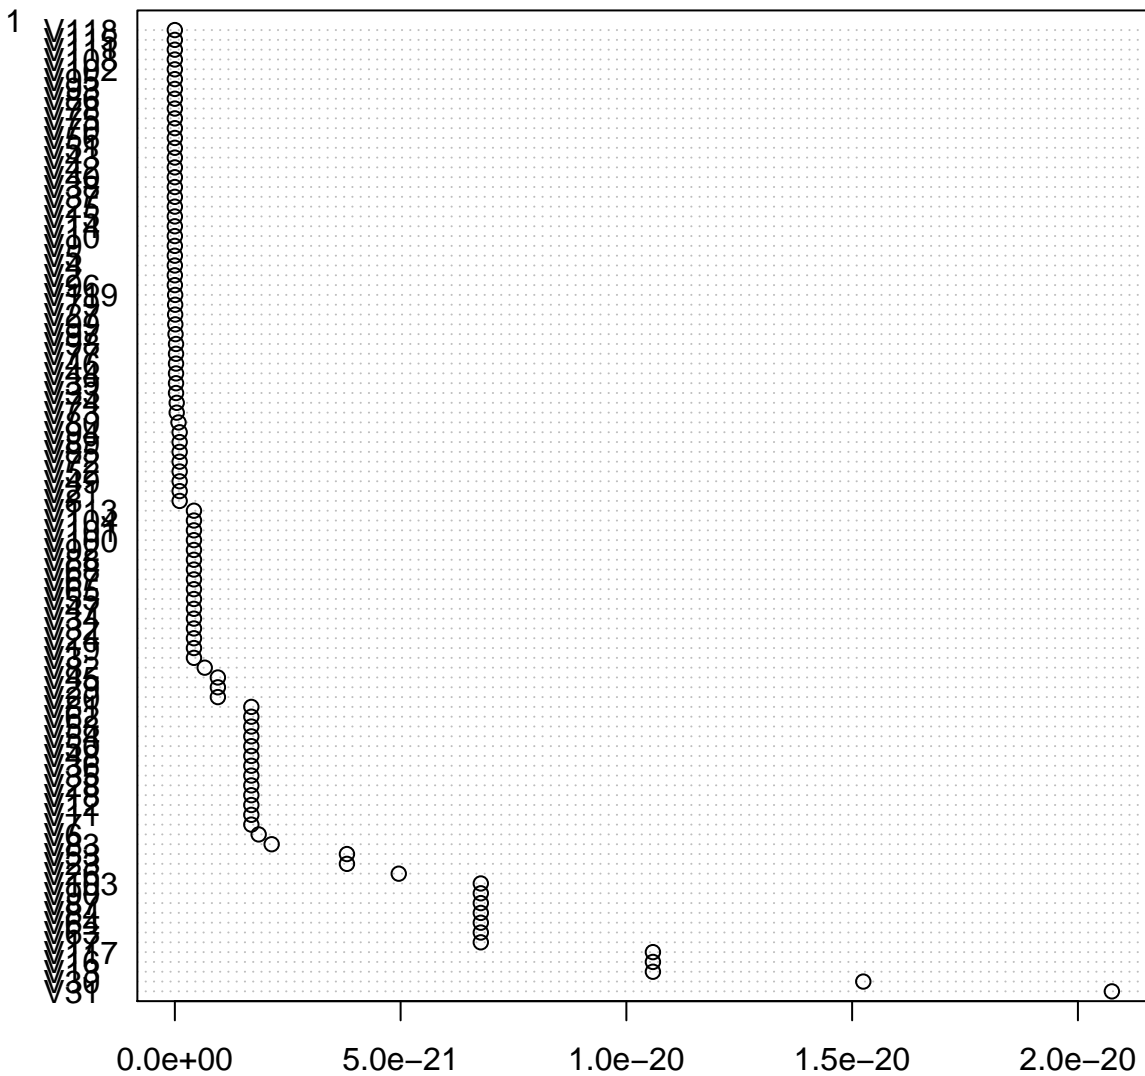

**Fitted vs. Residuals for Fitted Model**

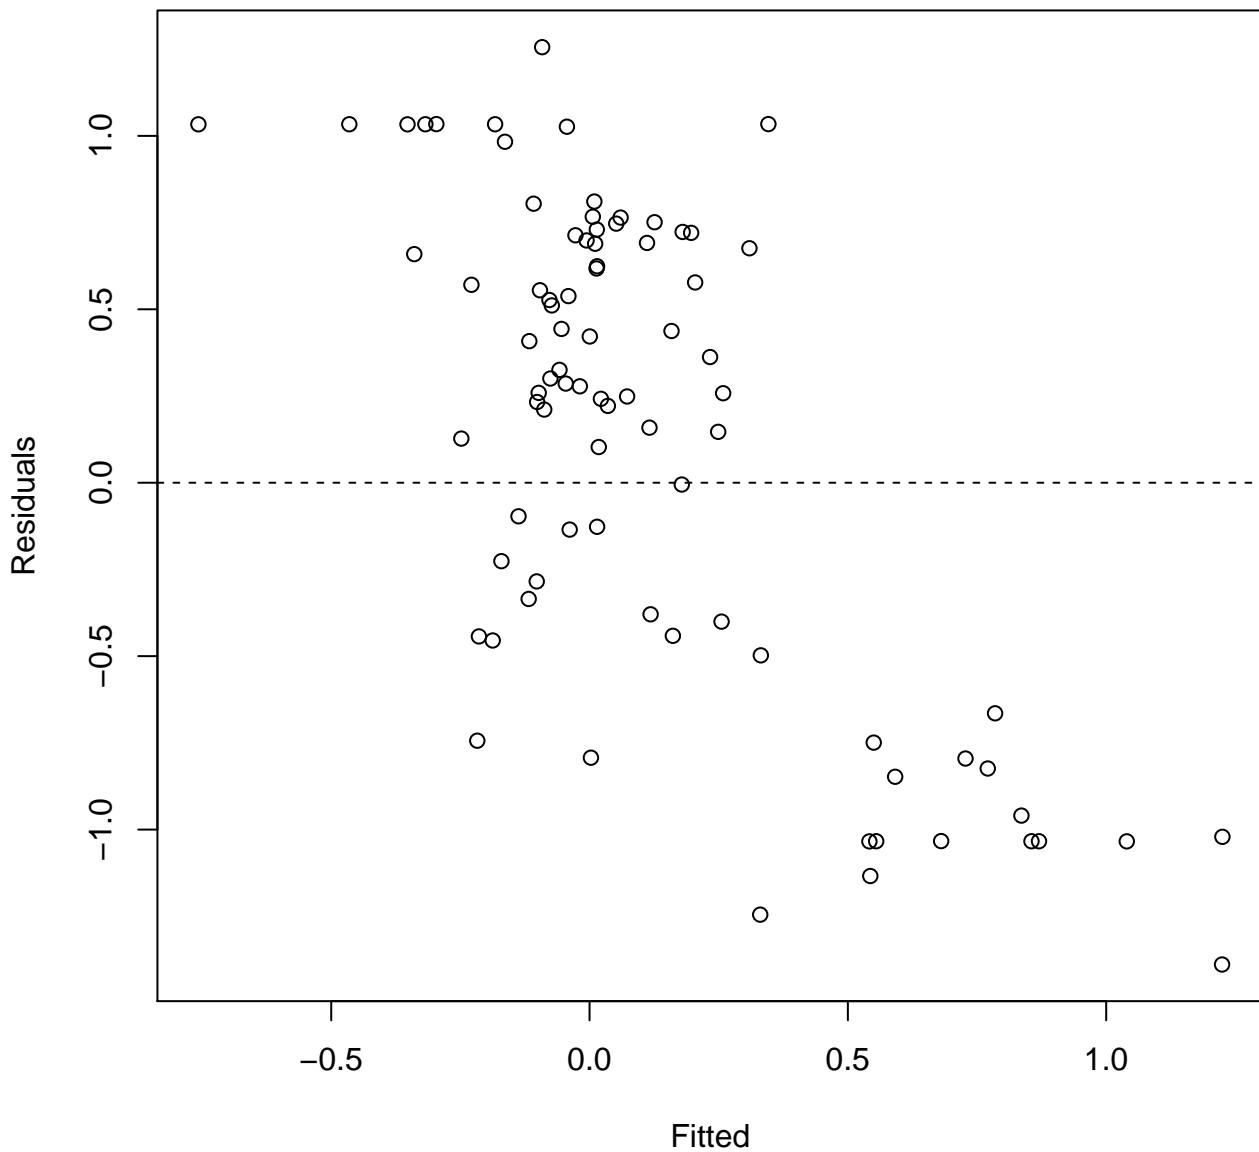

Supplement: rawData.zip [file rawData.zip]

# Models' differences on the training set (data split 7)

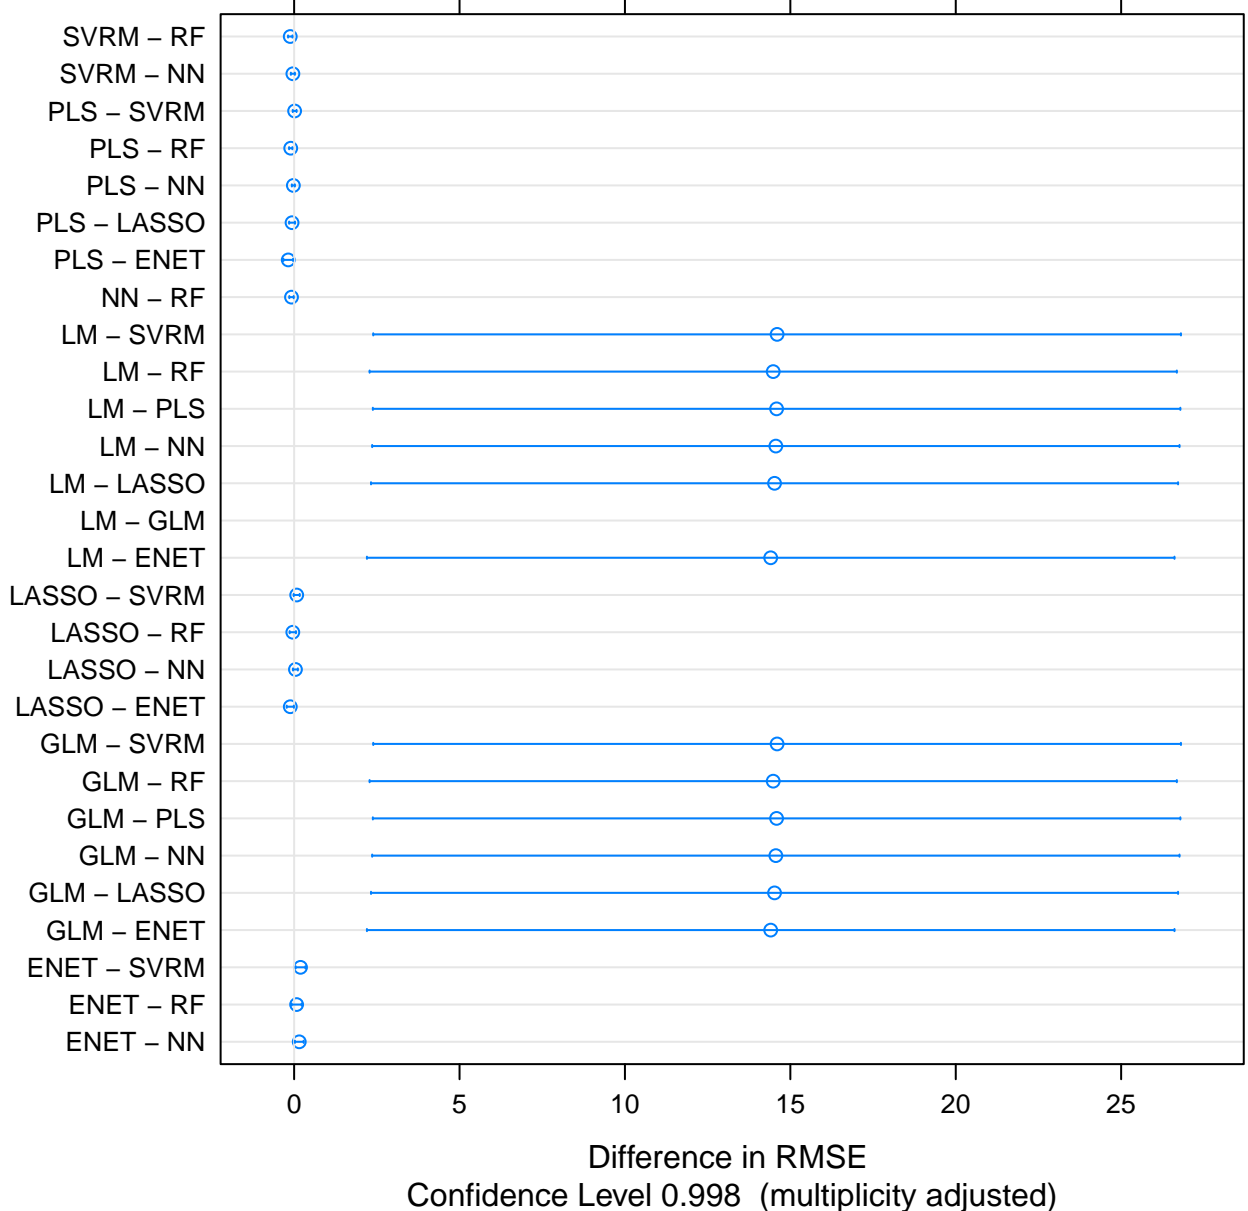

Supplement: rawData.zip [file rawData.zip]

# Models' differences on the training set (data split 7)

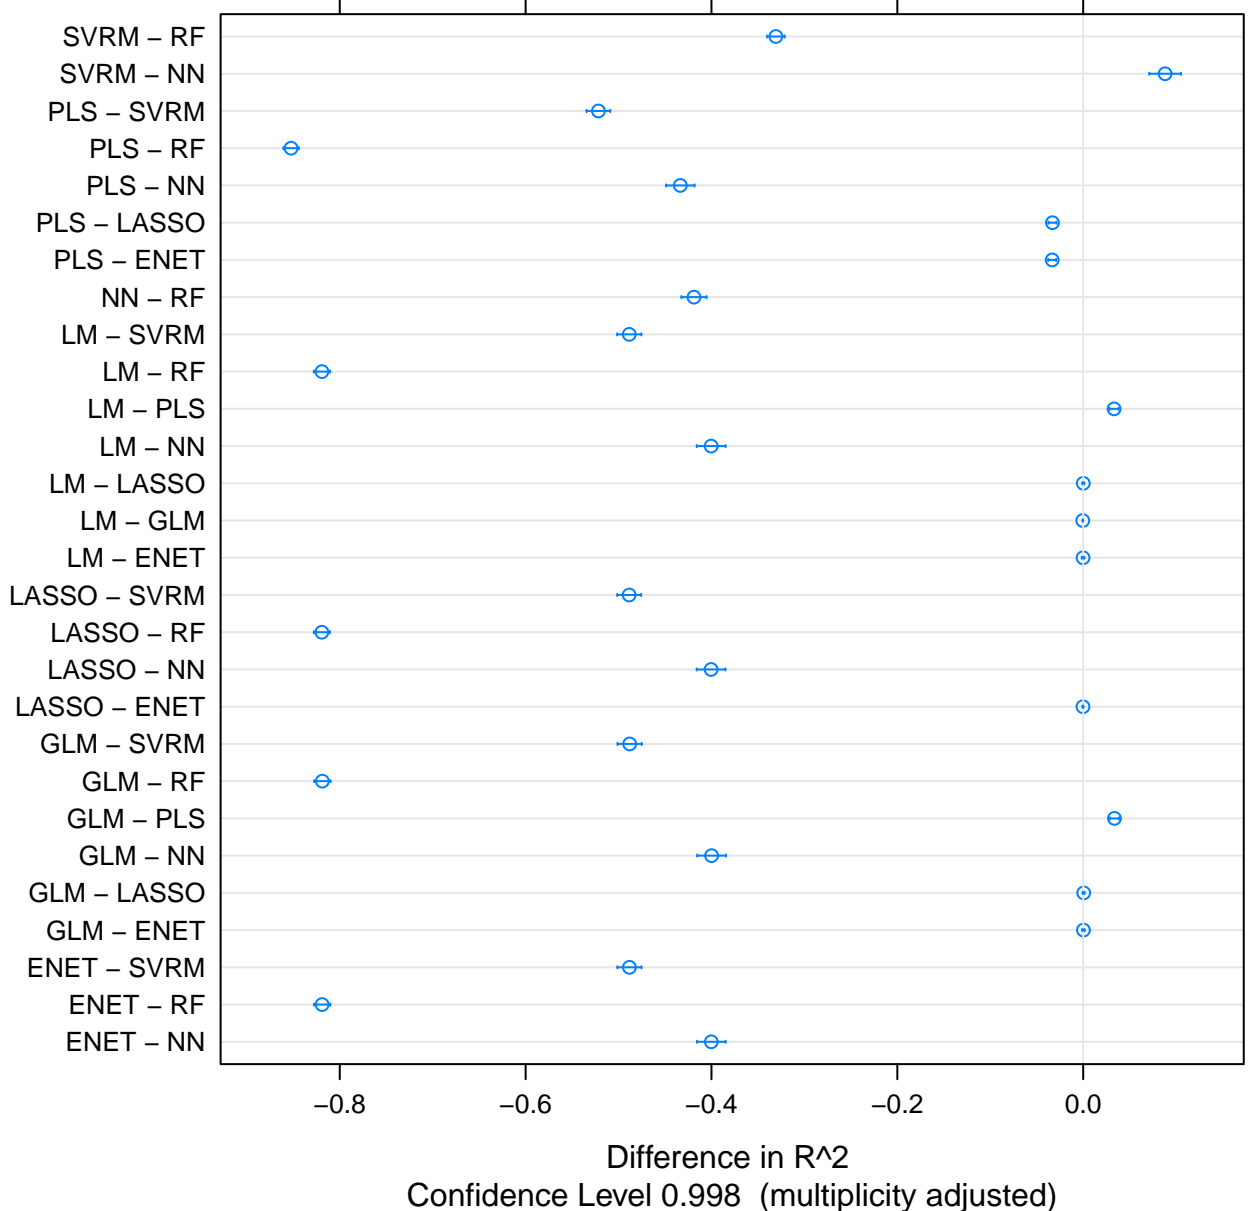

Supplement: rawData.zip [file rawData.zip]

# Resampling results on the training set (data split 5)

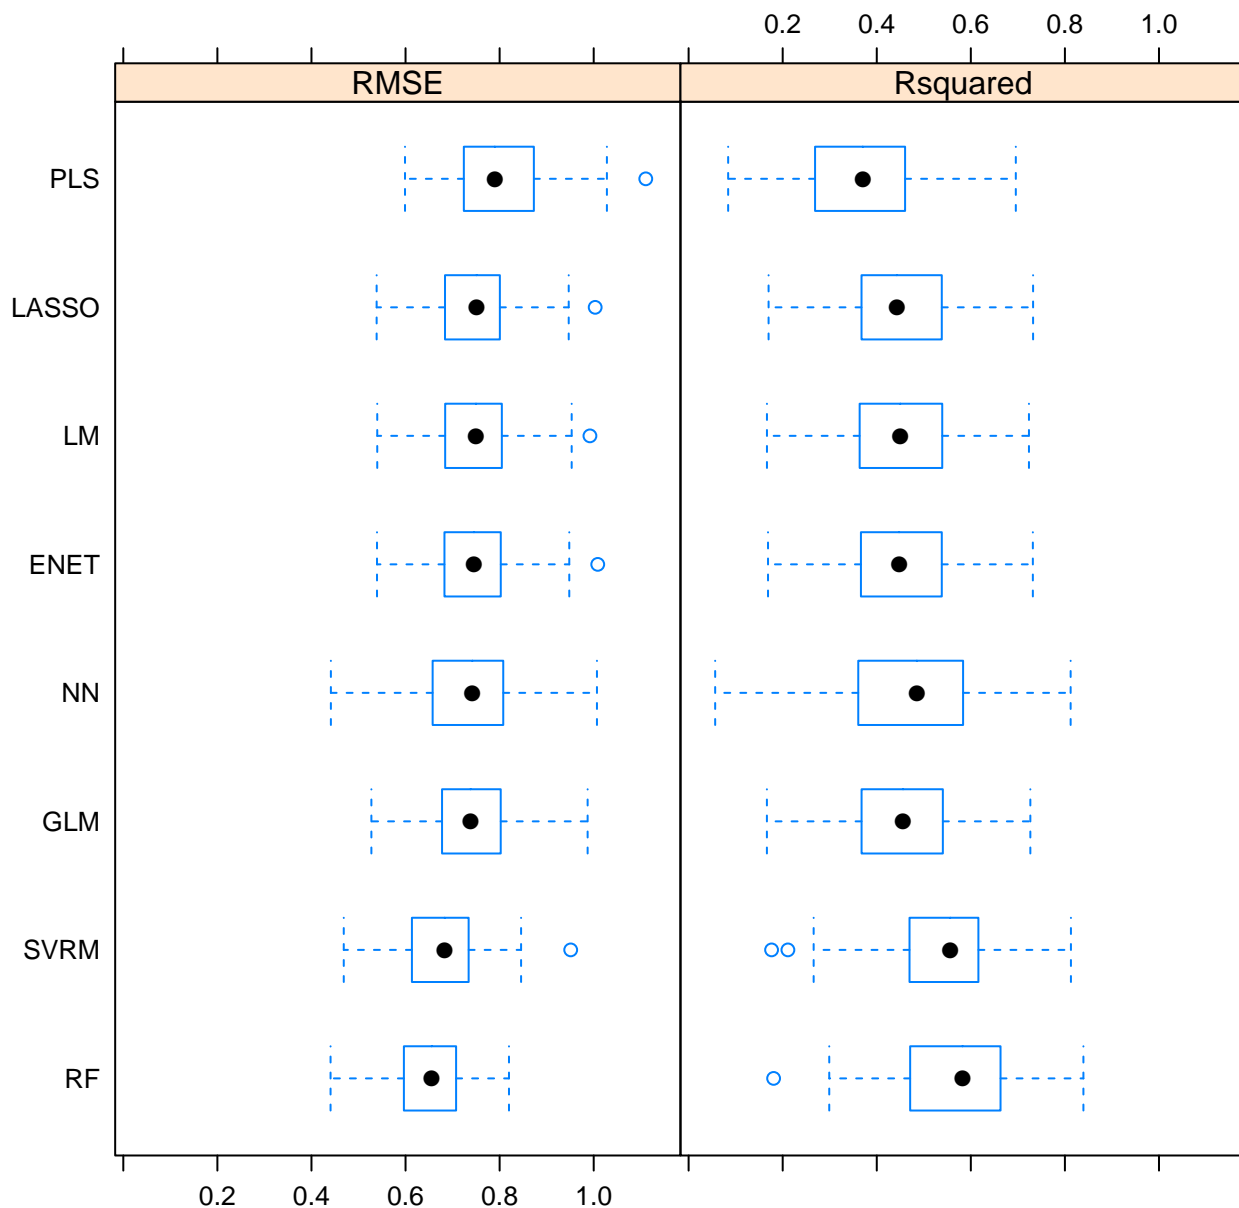

Supplement: rawData.zip [file rawData.zip]

# Models' differences on the training set (data split 7)

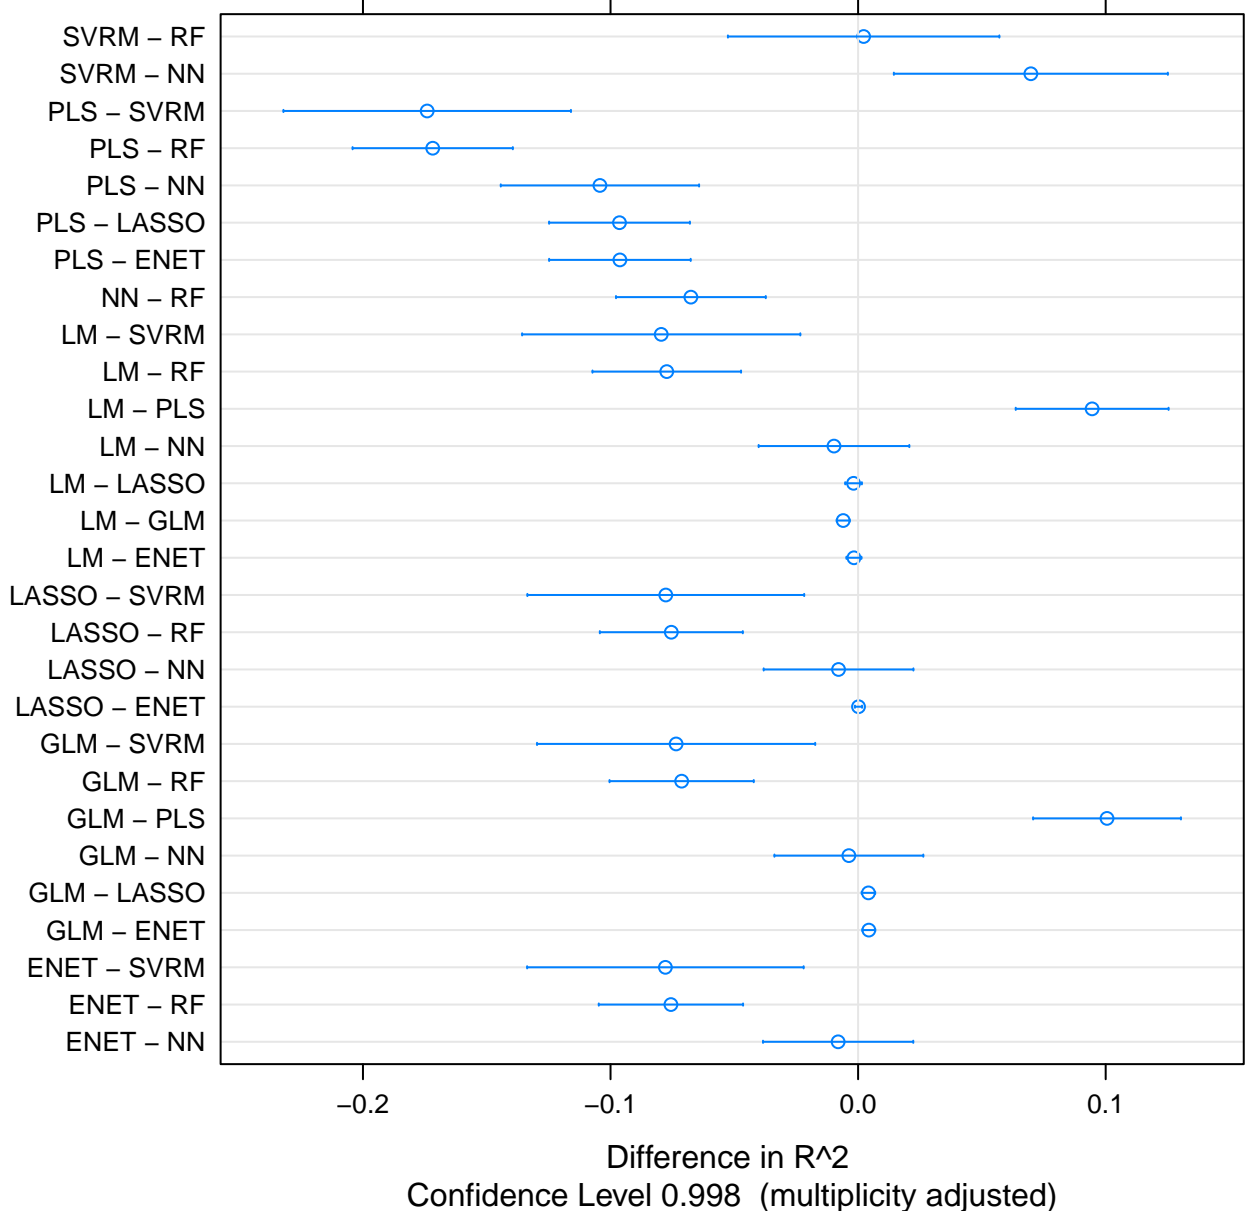

Supplement: rawData.zip [file rawData.zip]

# Resampling results on the training set (data split 5)

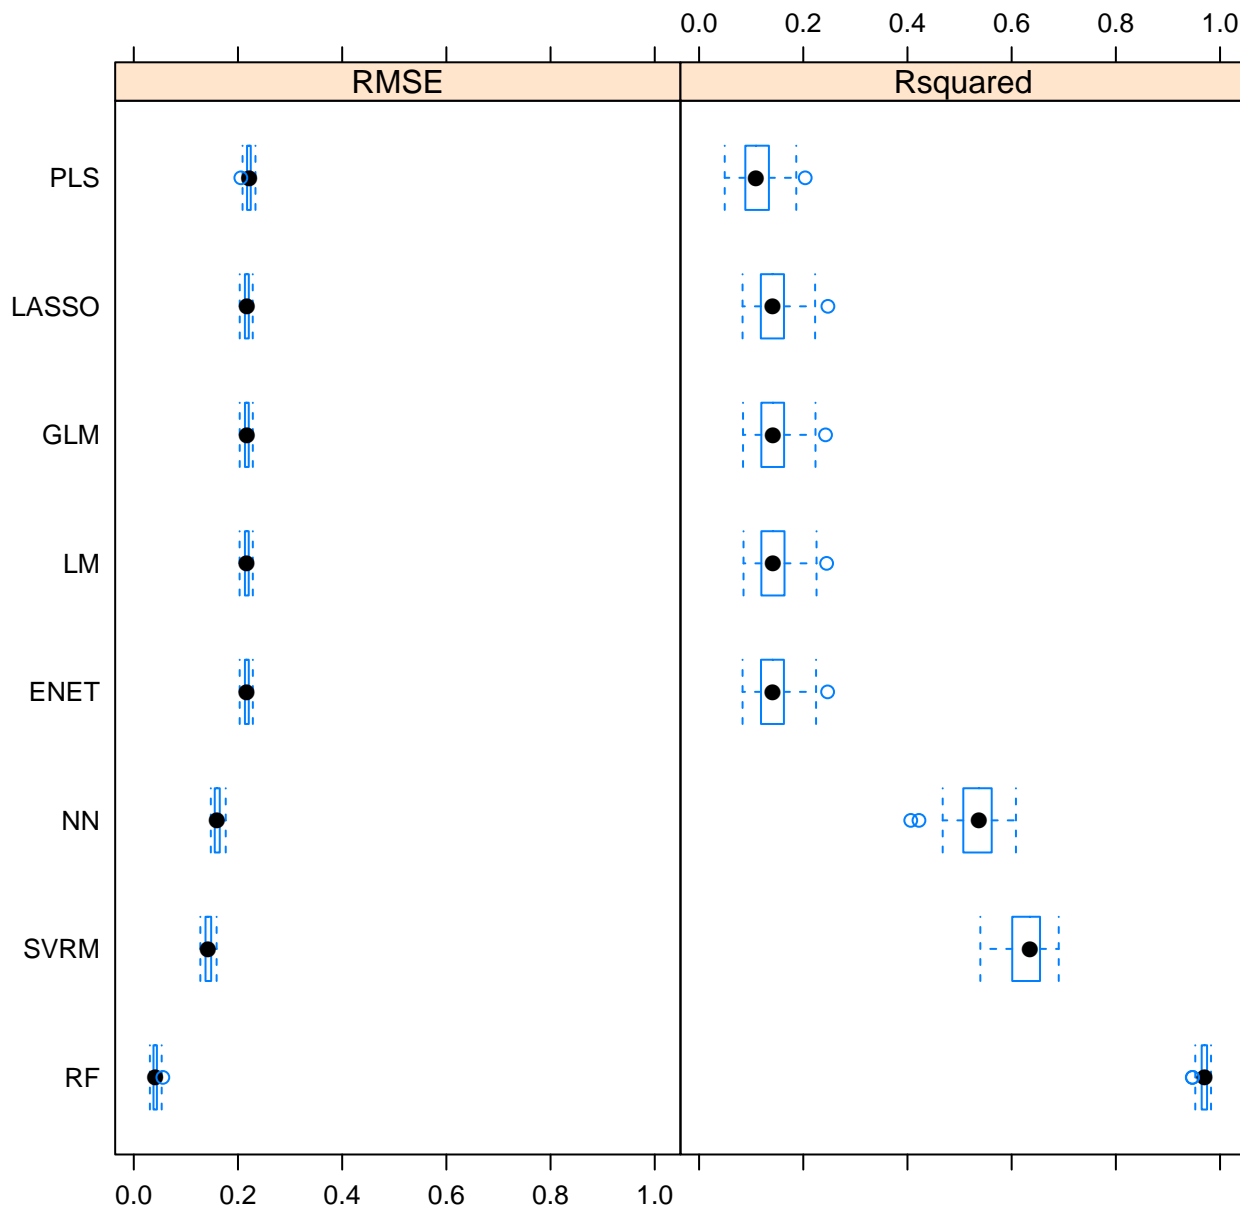

Supplement: rawData.zip [file rawData.zip]

# Models' differences on the training set (data split 4)

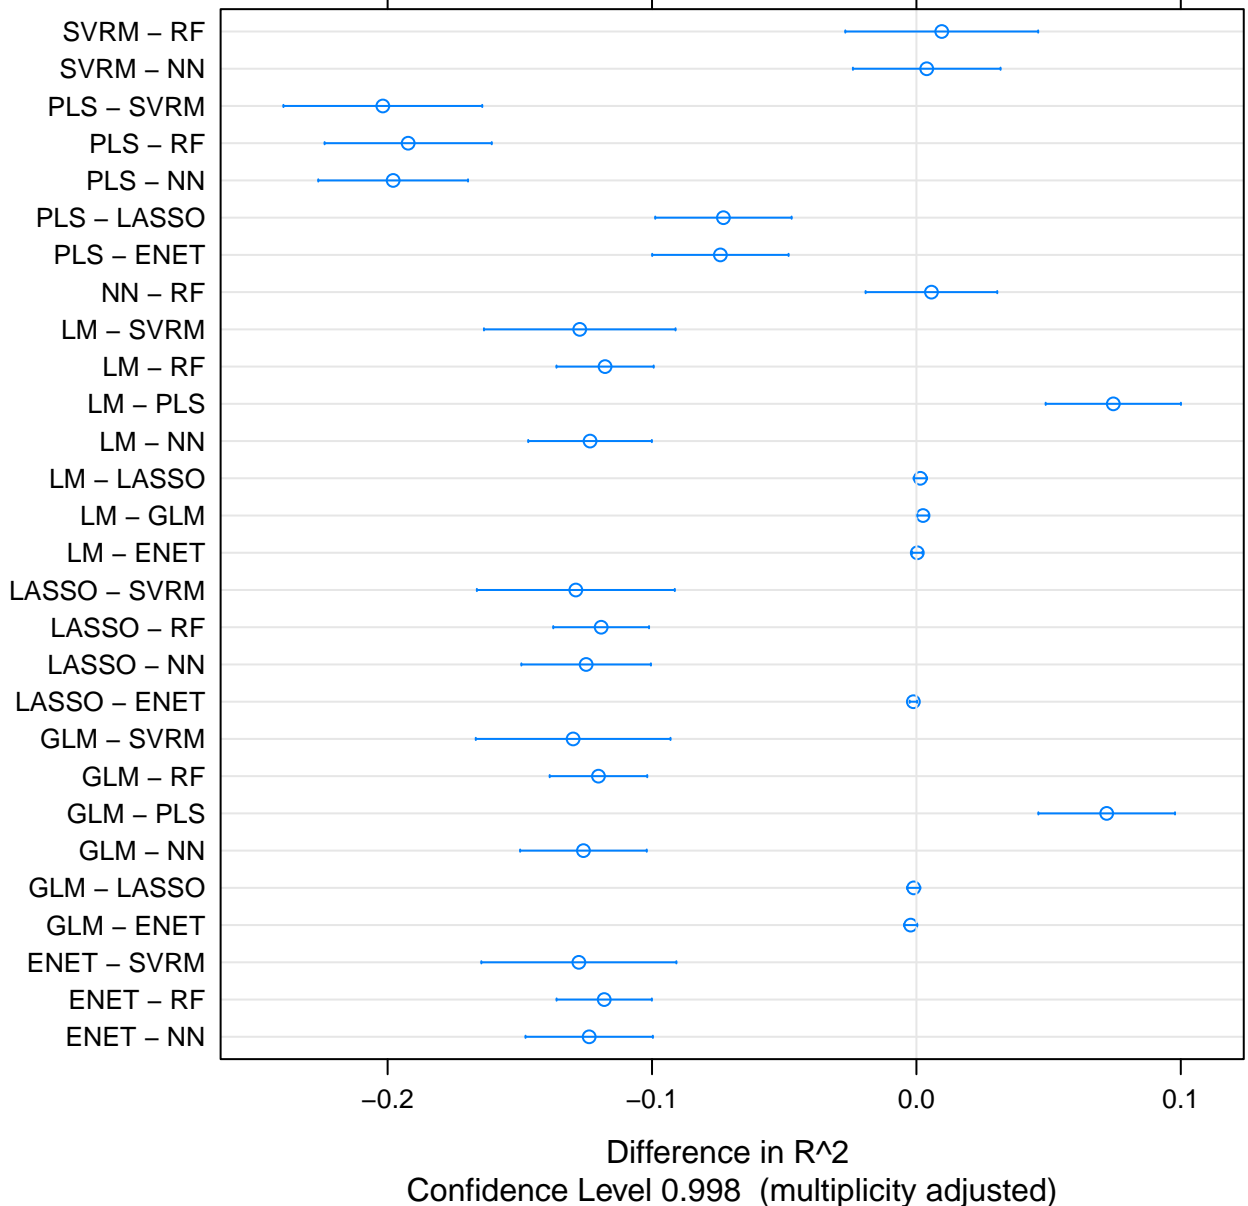

Supplement: rawData.zip [file rawData.zip]

# Resampling results on the training set (data split 2)

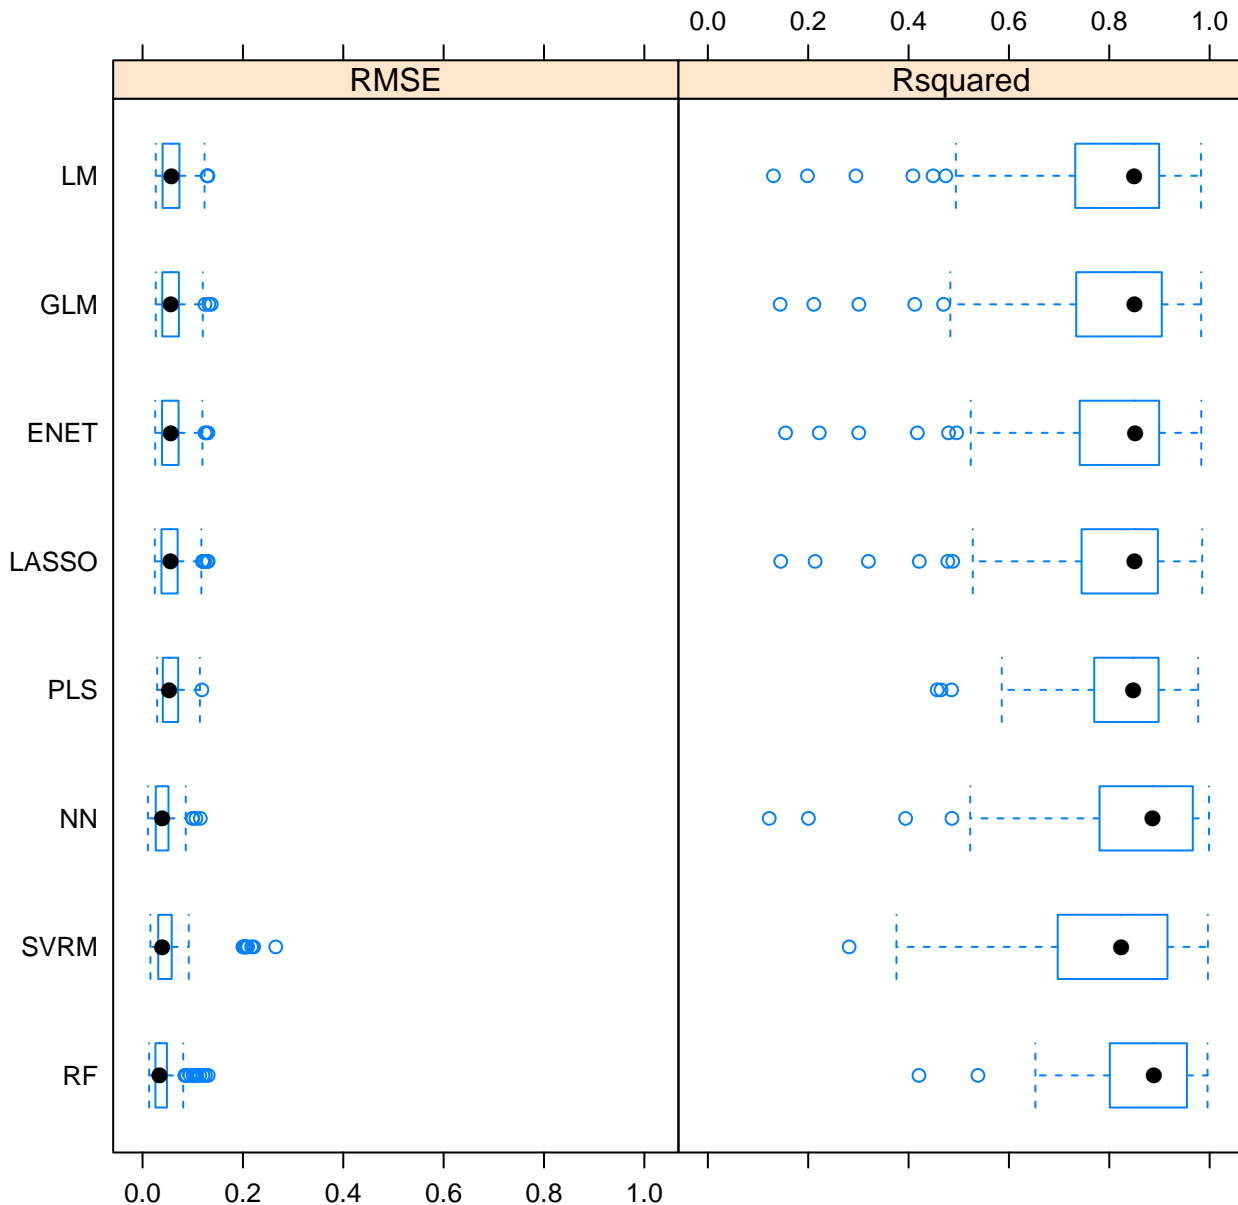

Supplement: rawData.zip [file rawData.zip]

# Models' differences on the training set (data split 2)

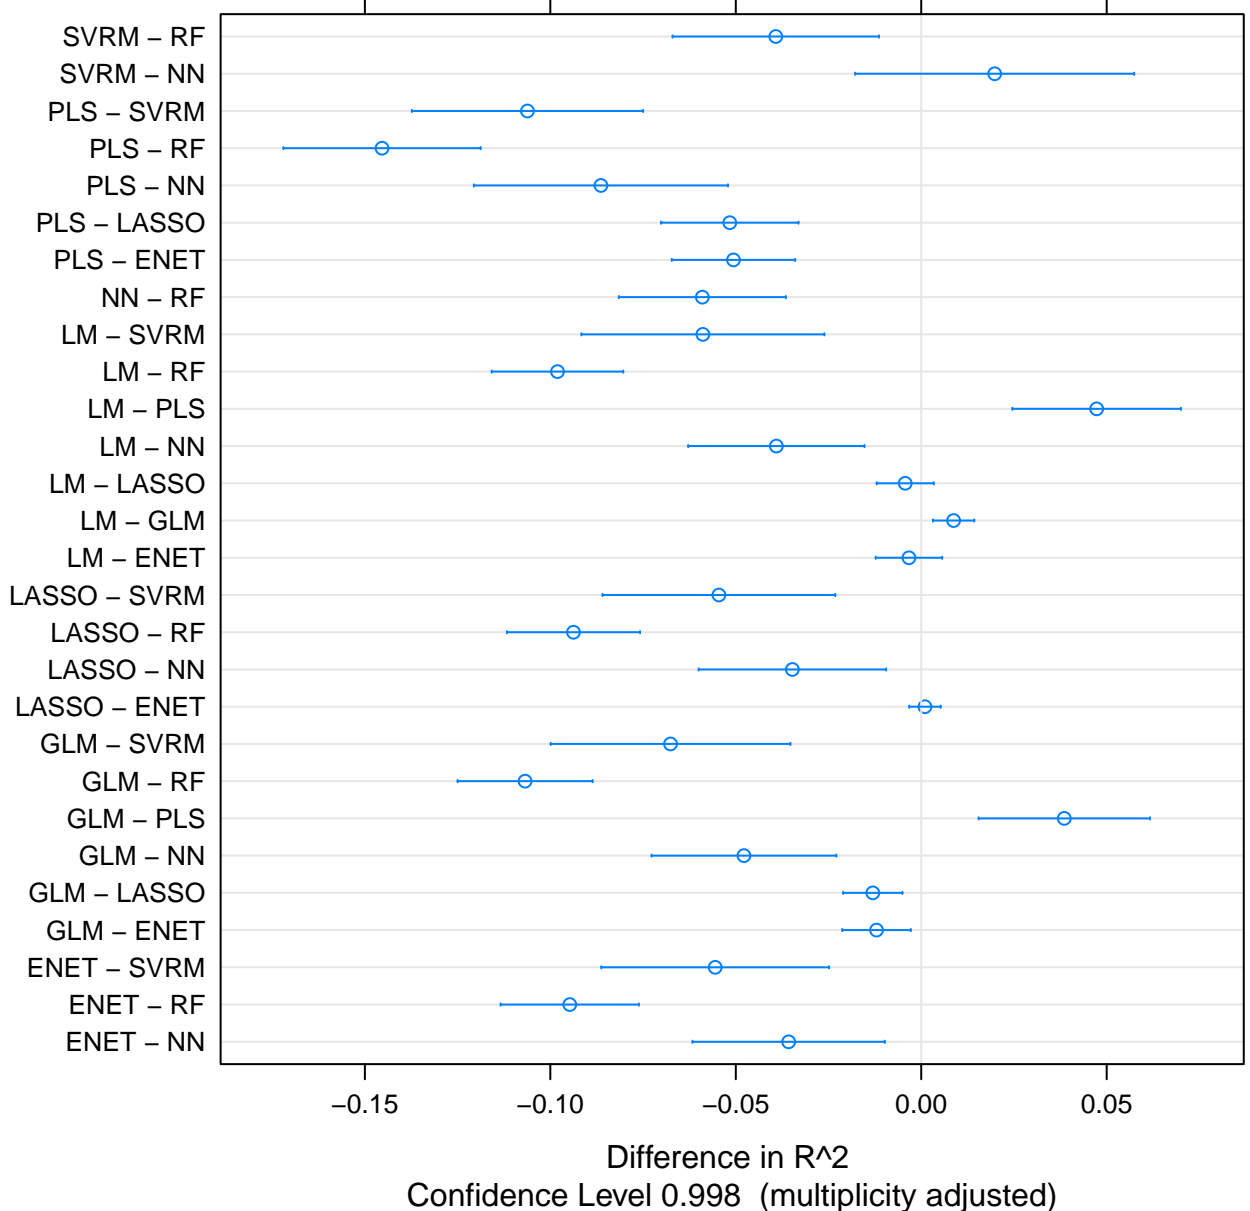

Supplement: rawData.zip [file rawData.zip]

# Models' differences on the training set (data split 5)

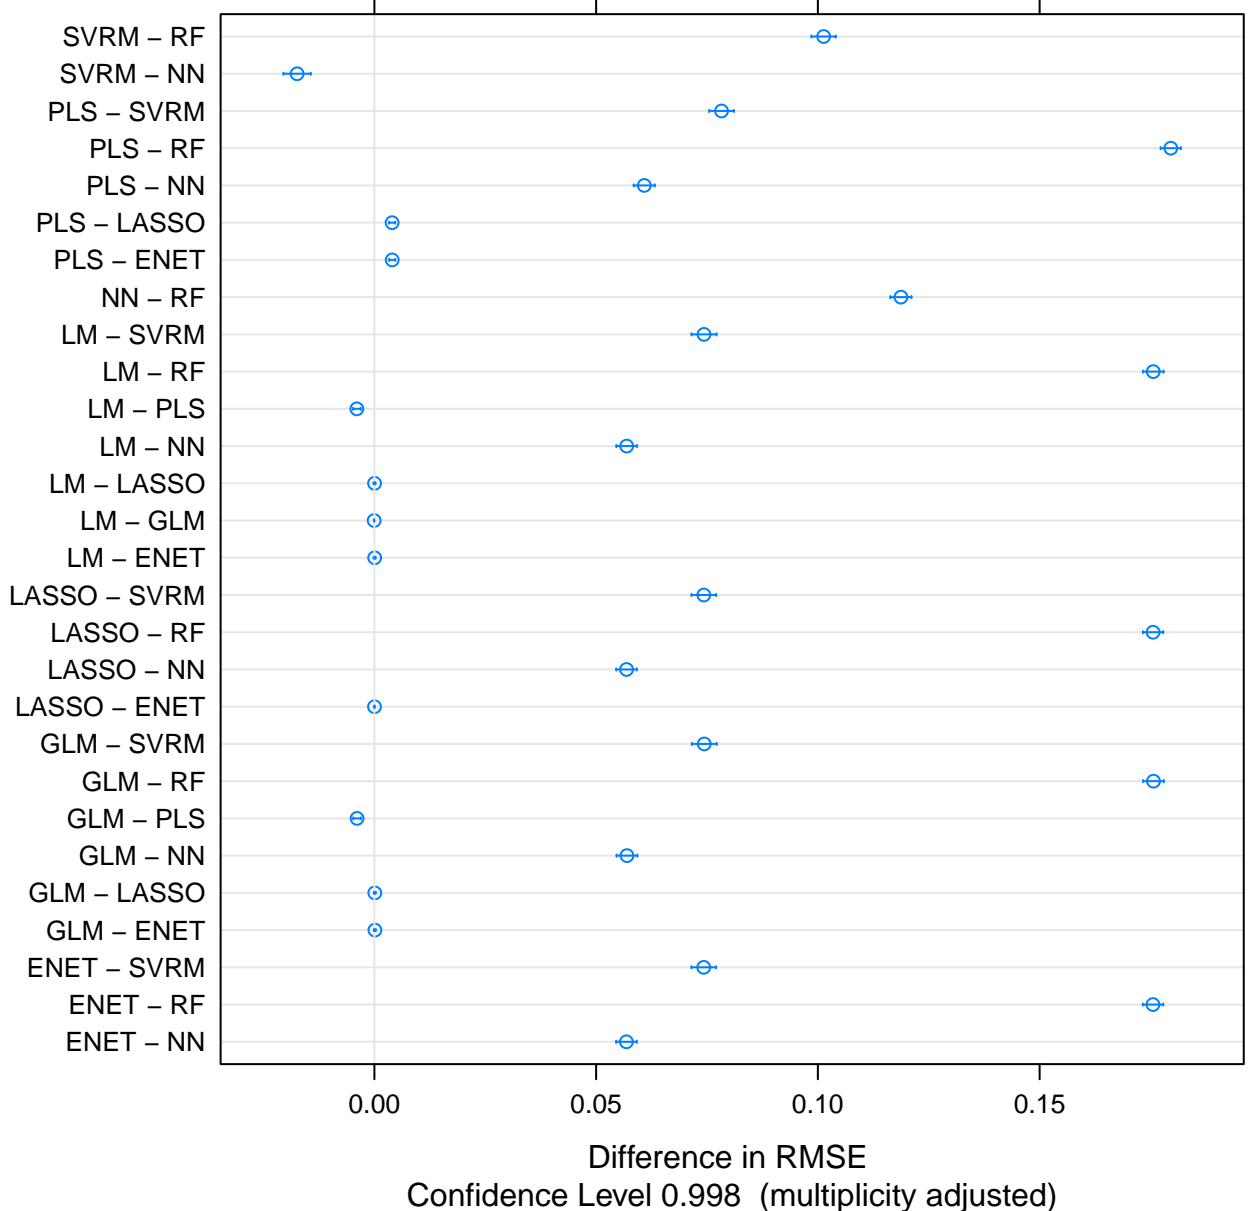

Supplement: rawData.zip [file rawData.zip]

**Train Yobs-Ypred**

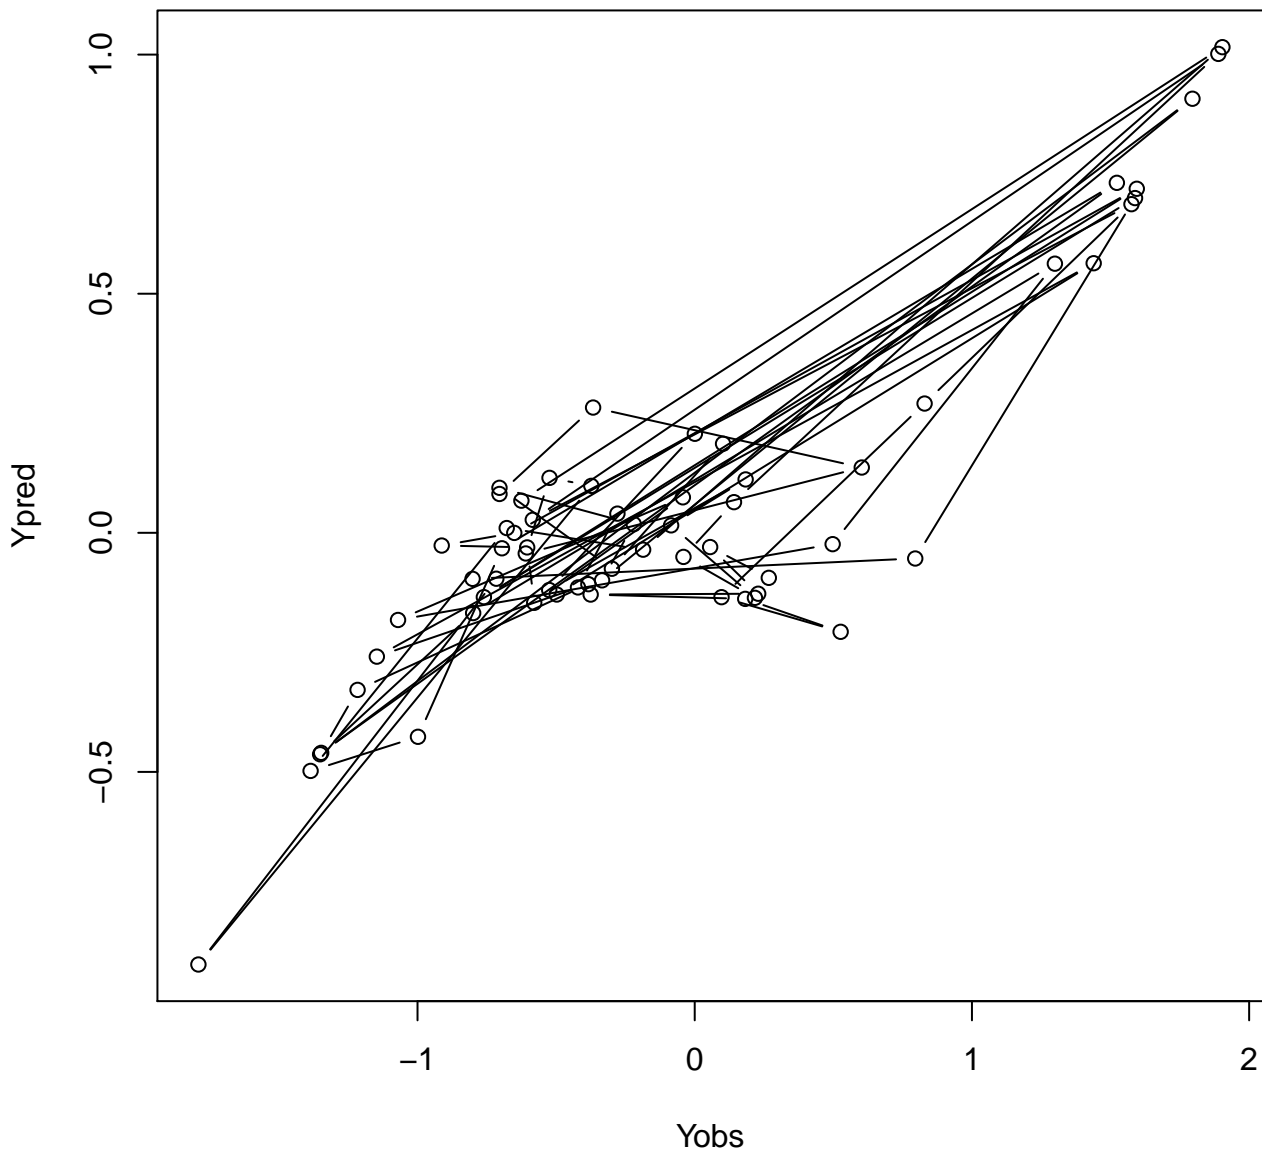

# Test Yobs-Ypred

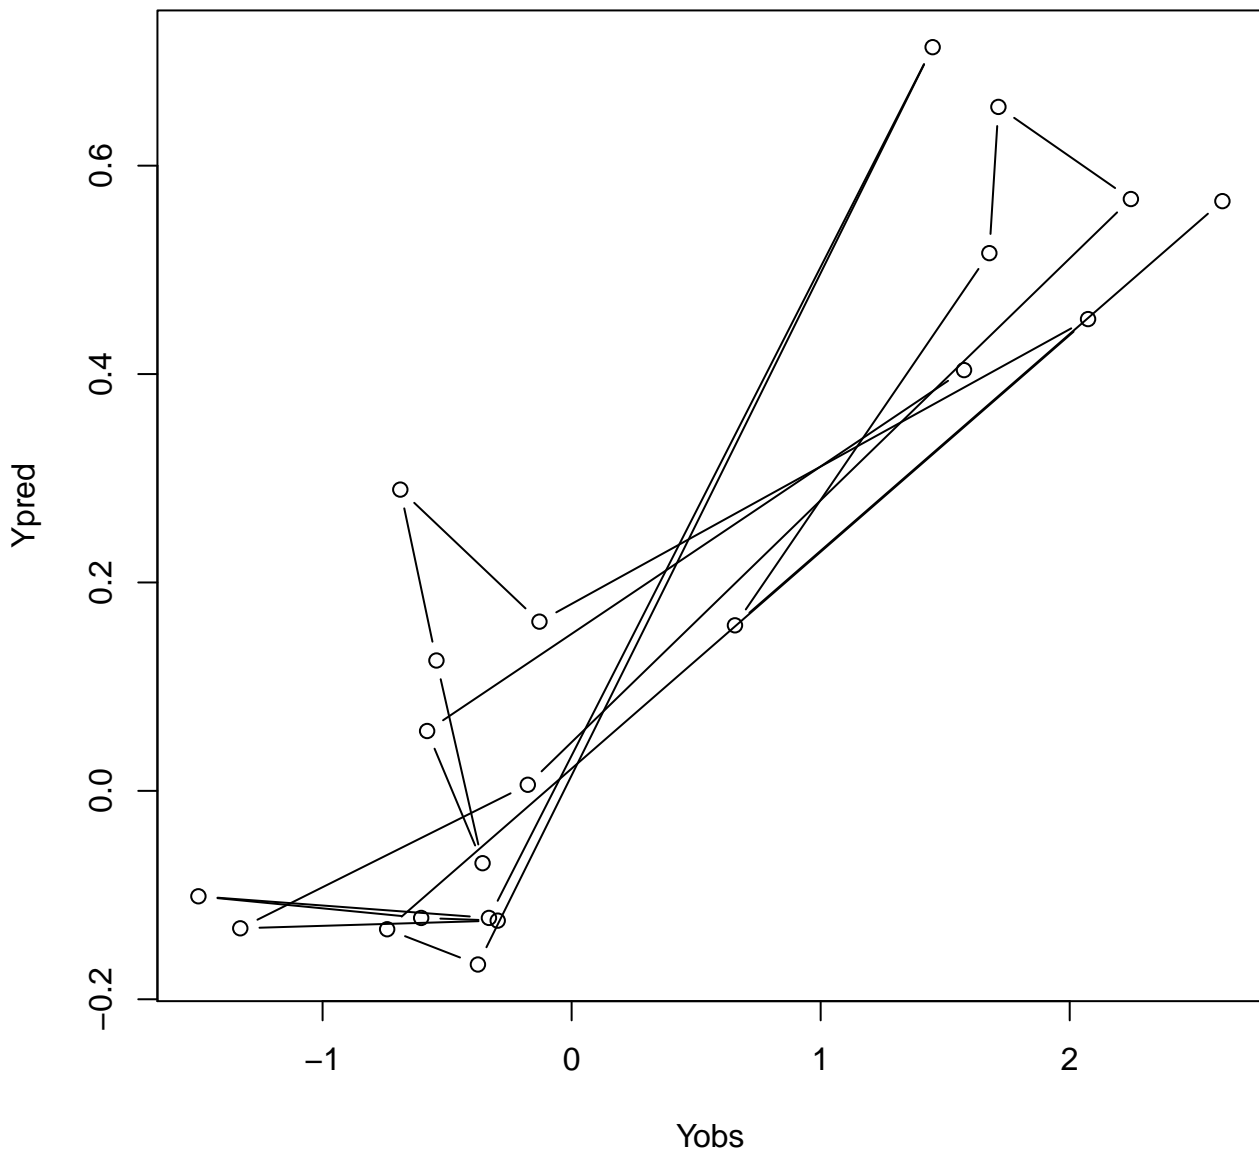

# Feature Importance

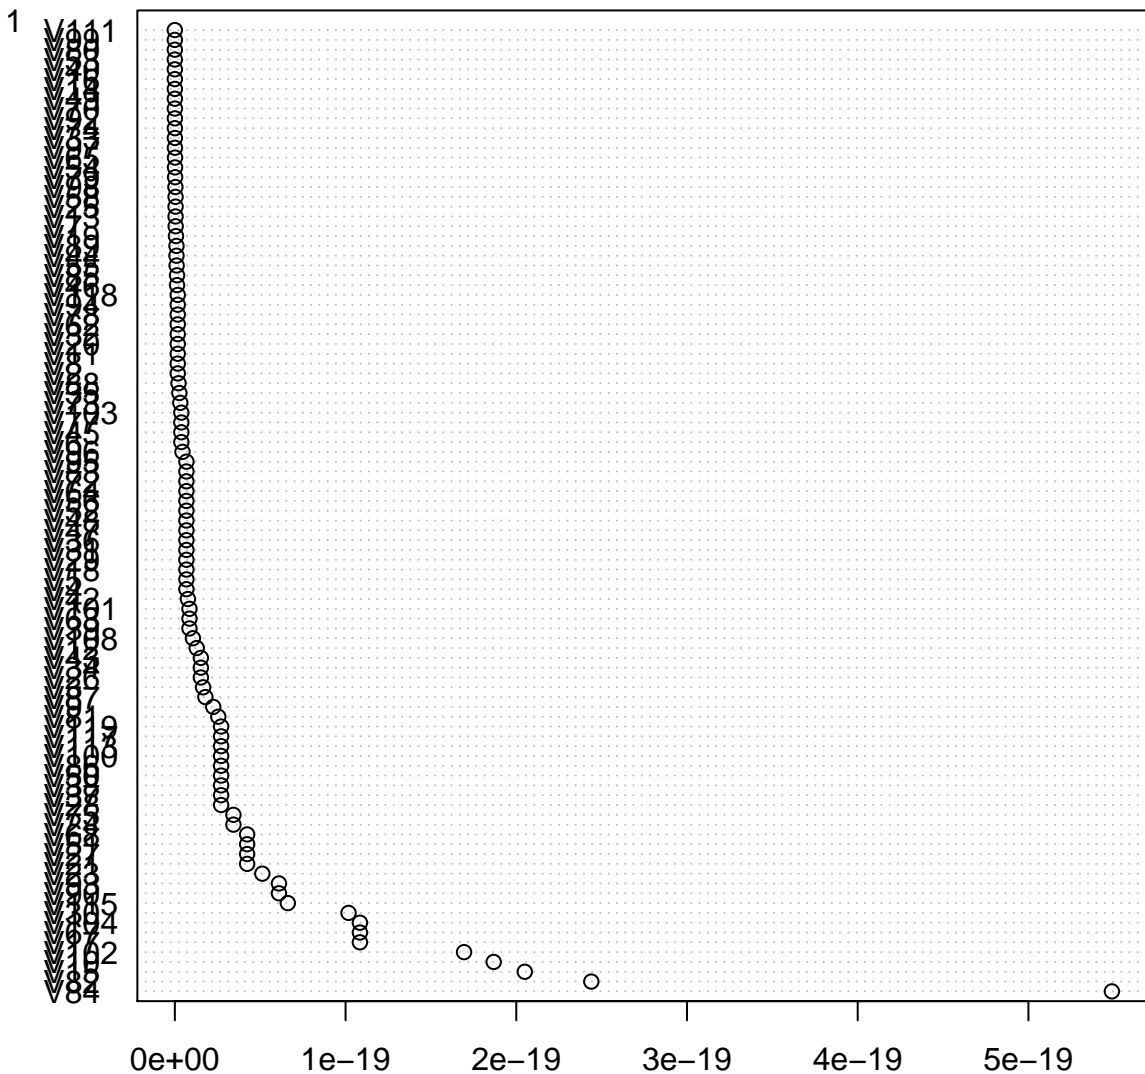

**Fitted vs. Residuals for Fitted Model**

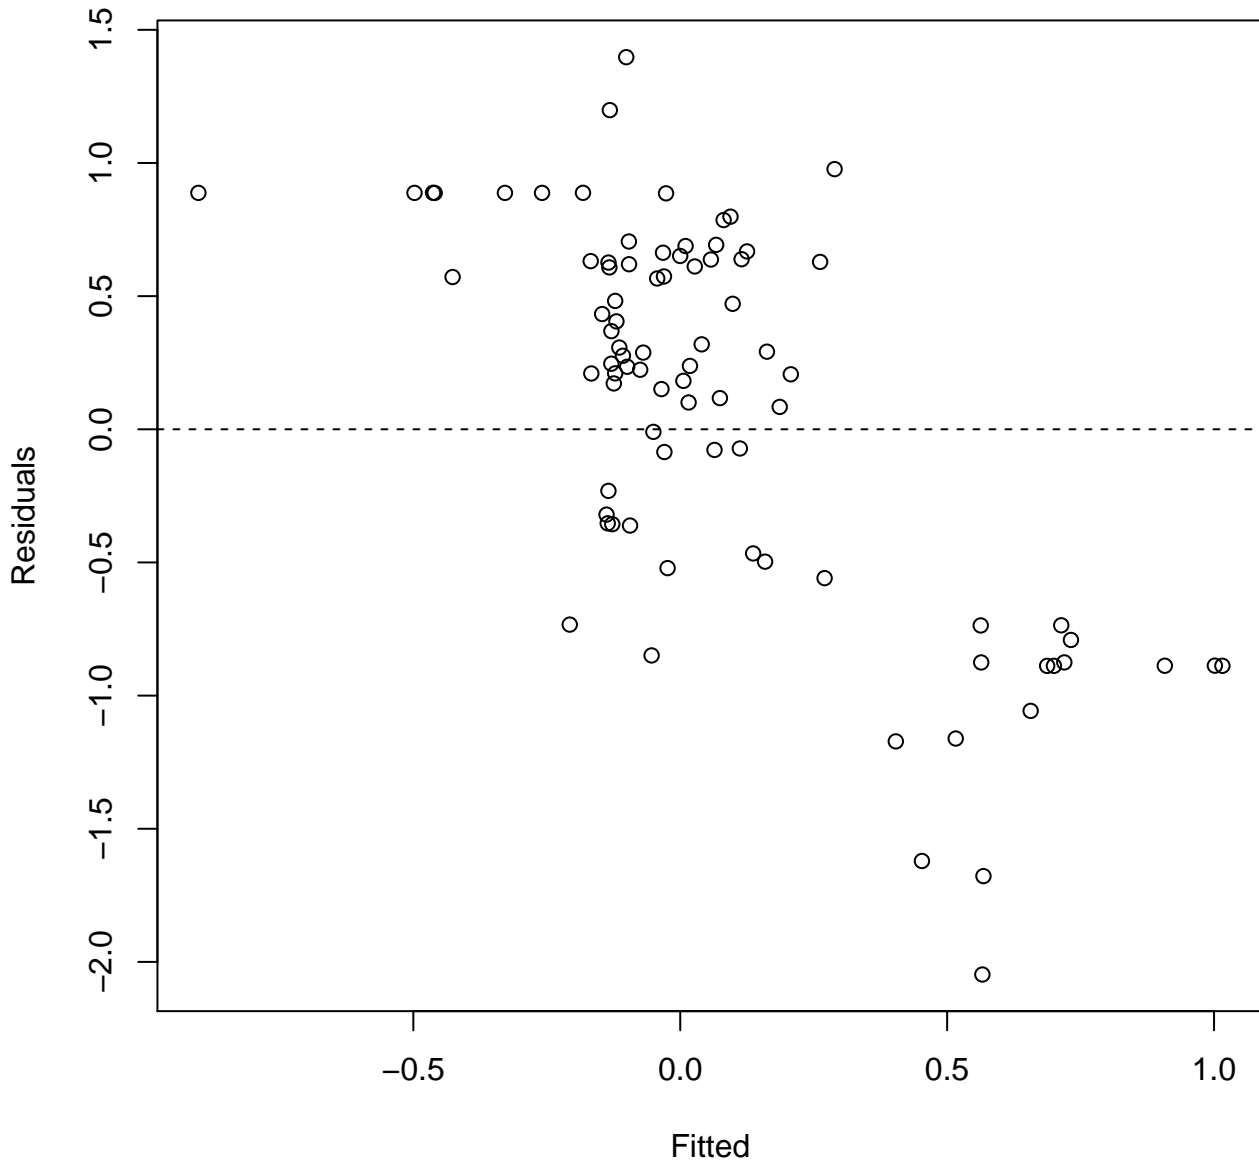

Supplement: rawData.zip [file rawData.zip]

# Models' differences on the training set (data split 2)

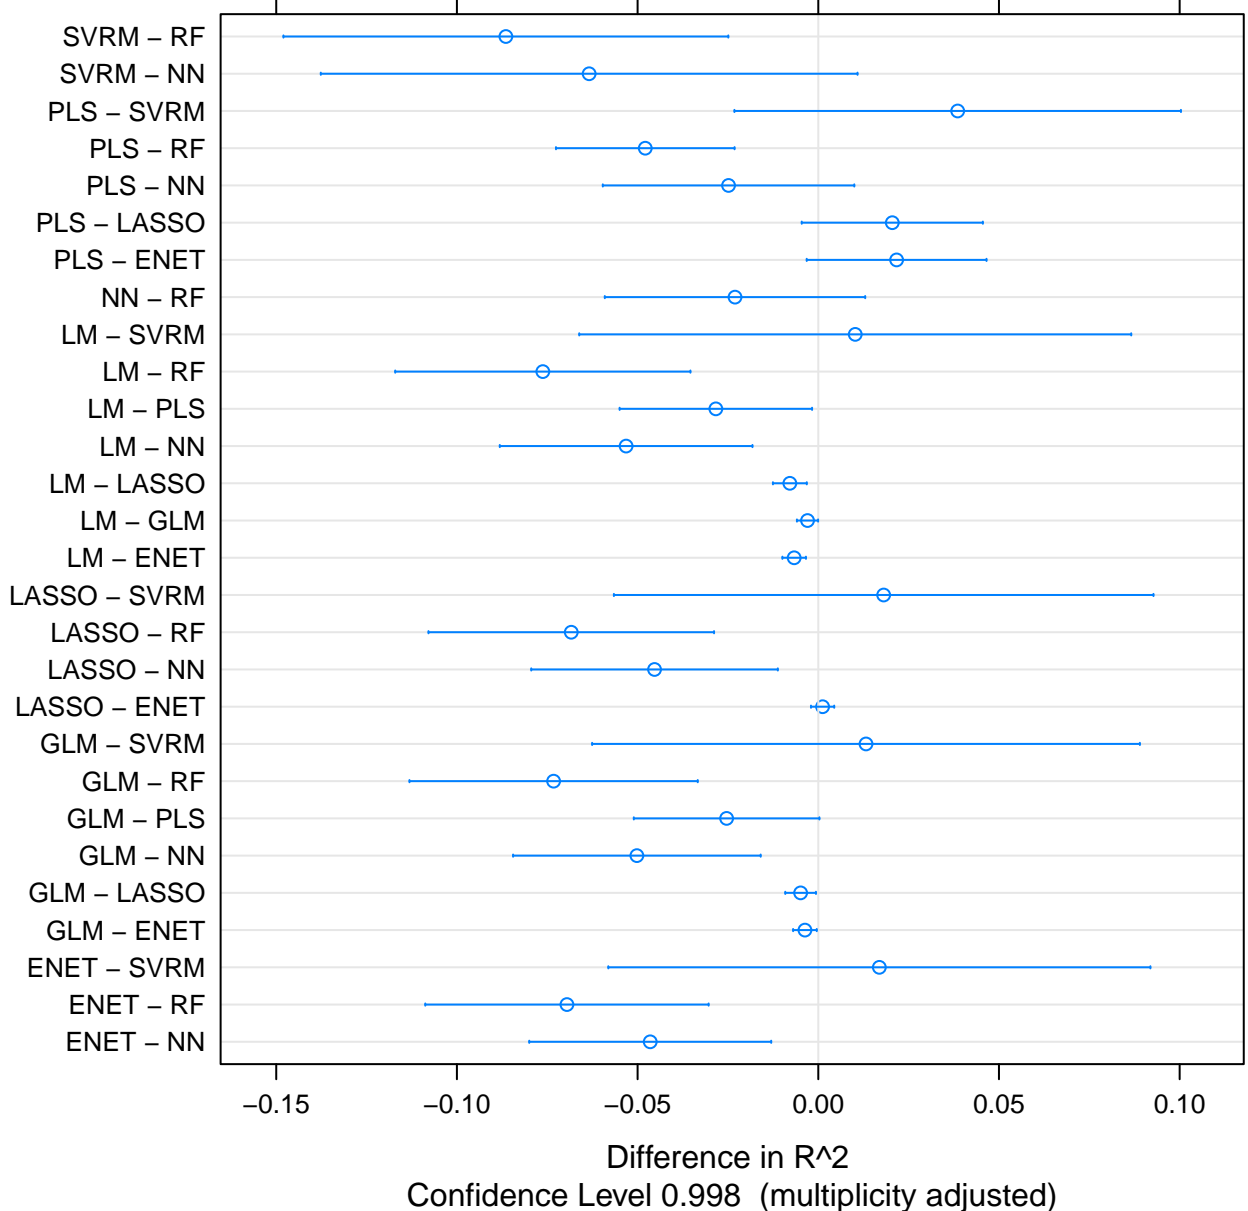

Supplement: rawData.zip [file rawData.zip]

# Models' differences on the training set (data split 1)

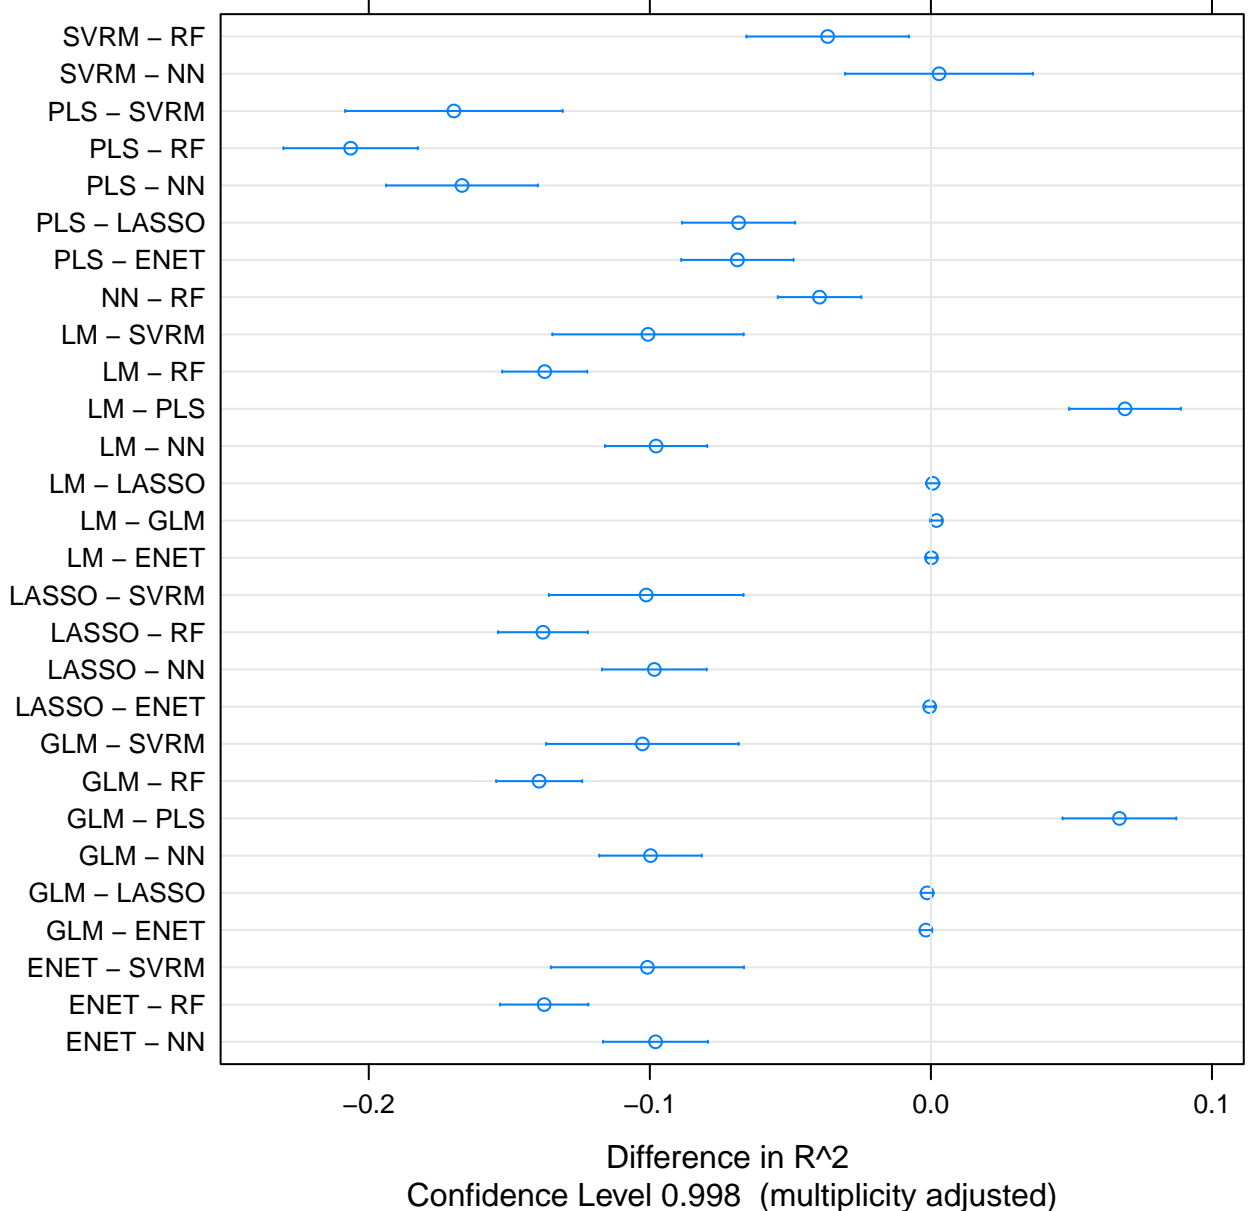

Supplement: rawData.zip [file rawData.zip]

# Models' differences on the training set (data split 7)

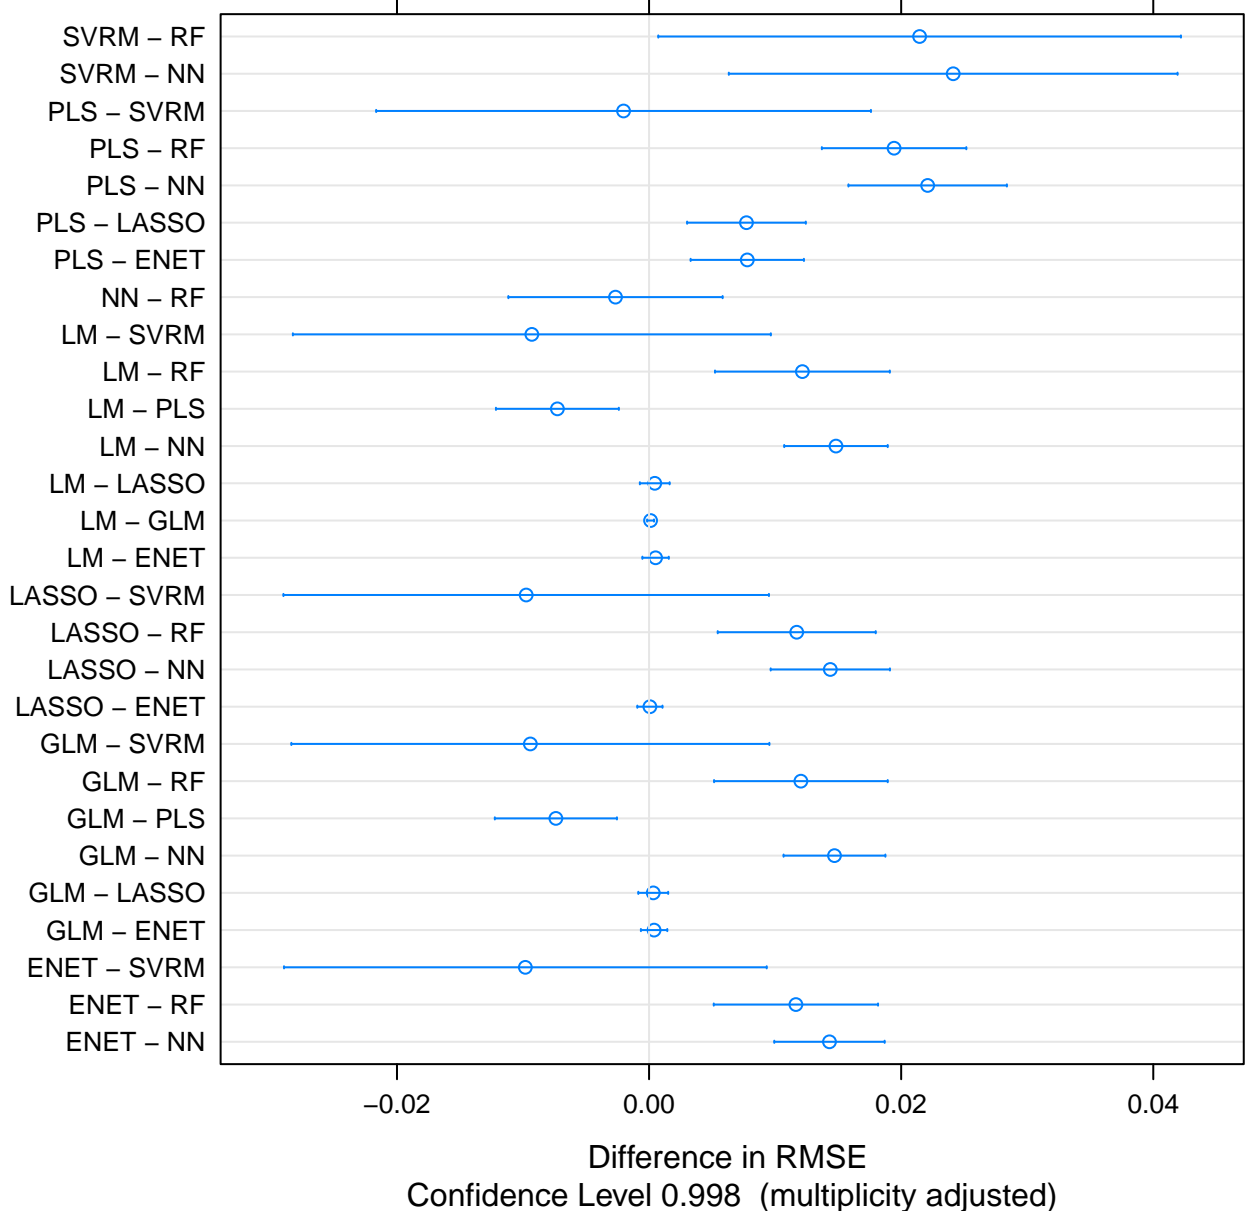

Supplement: rawData.zip [file rawData.zip]

# Resampling results on the training set (data split 4)

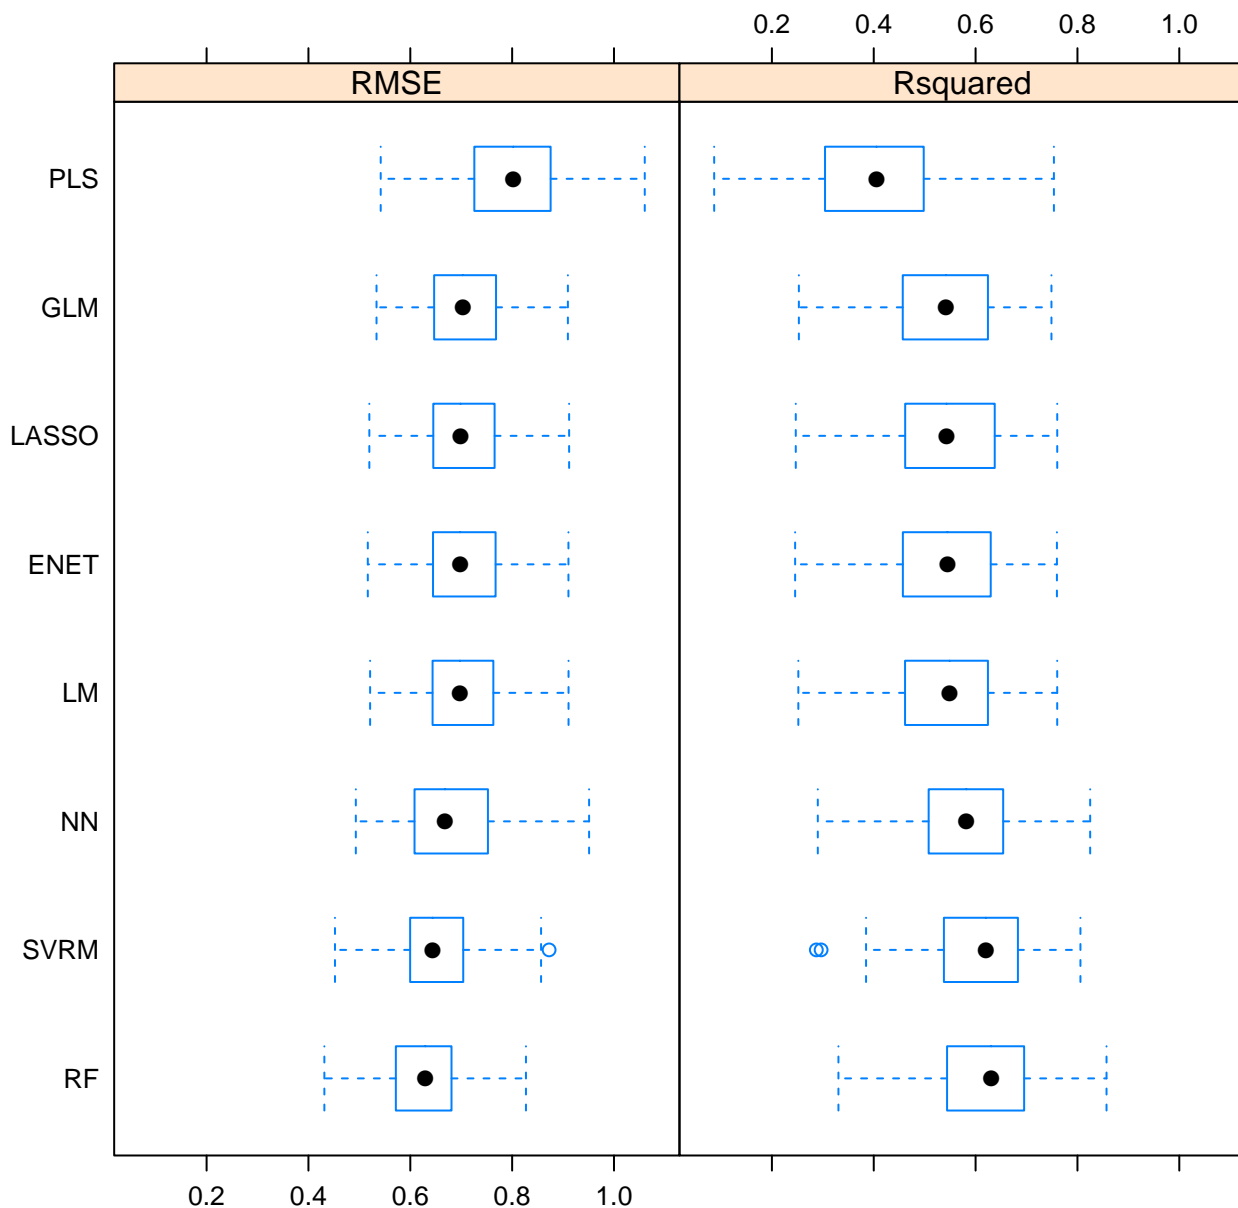

Supplement: rawData.zip [file rawData.zip]

# Models' differences on the training set (data split 5)

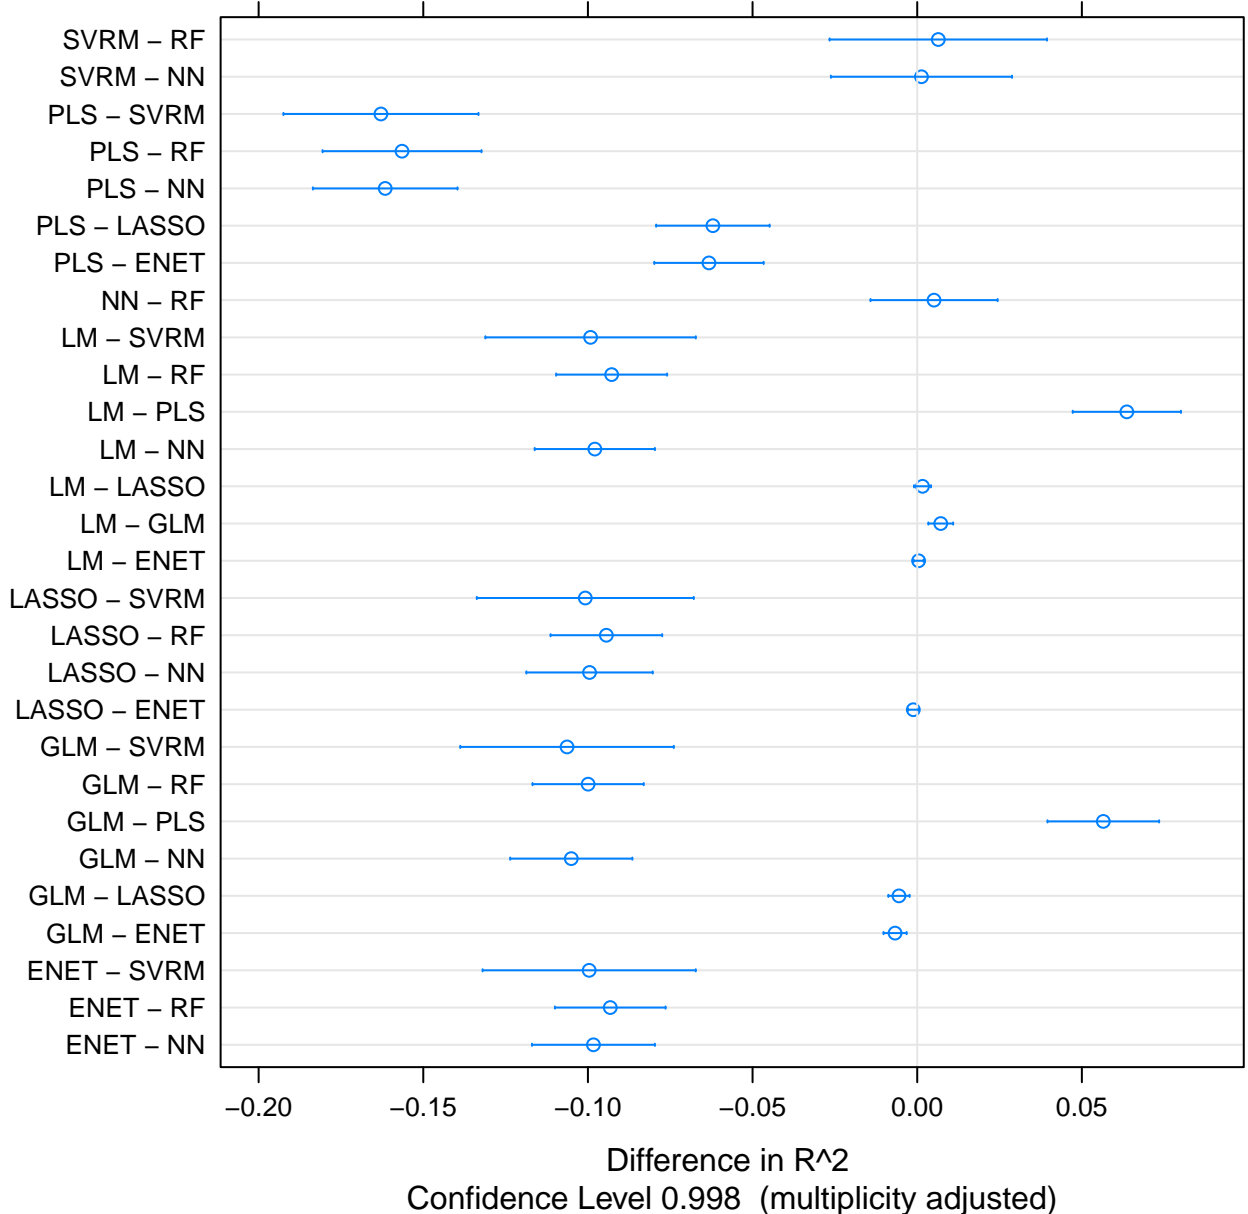

Supplement: rawData.zip [file rawData.zip]

# Models' differences on the training set (data split 1)

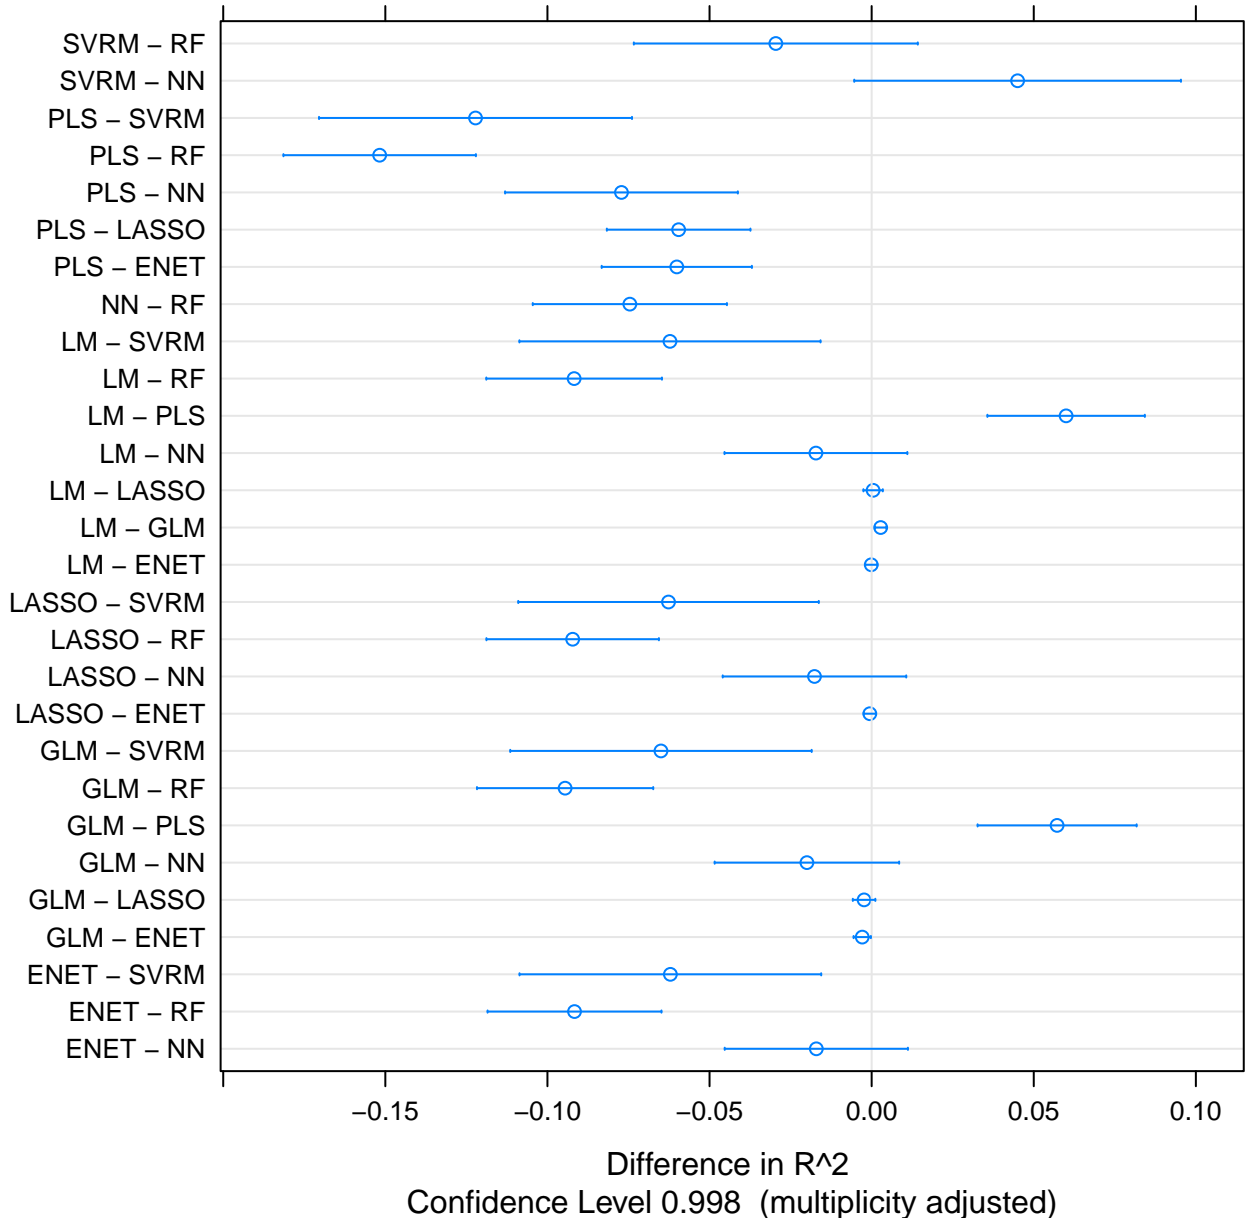

Supplement: rawData.zip [file rawData.zip]

# Models' differences on the training set (data split 2)

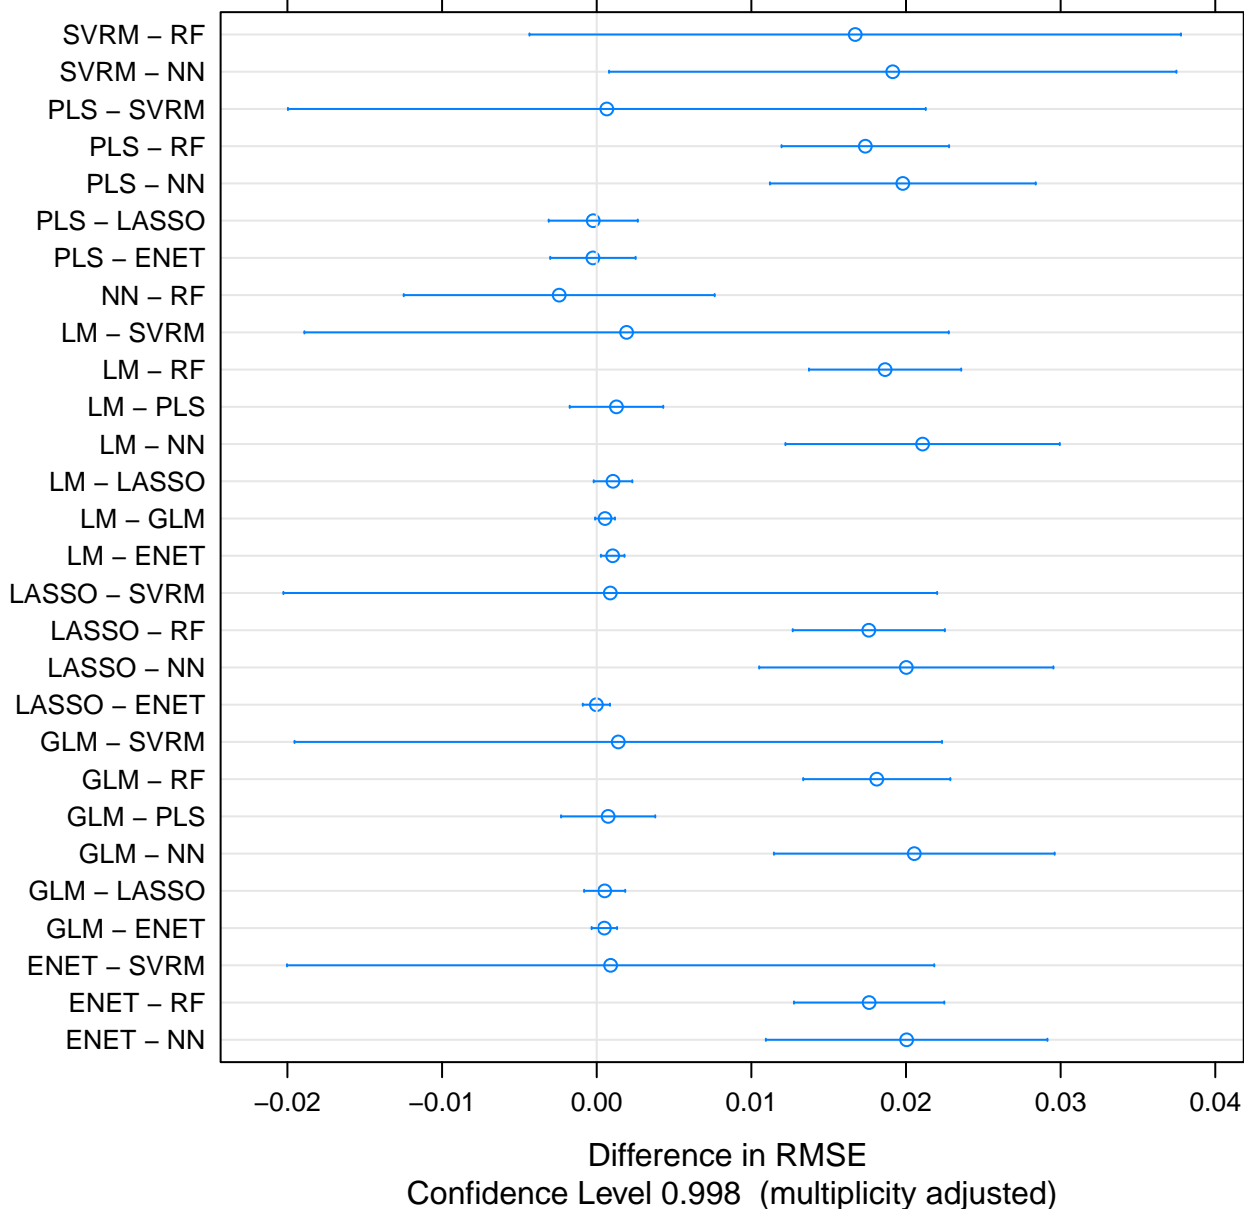

Supplement: rawData.zip [file rawData.zip]

# Models' differences on the training set (data split 3)

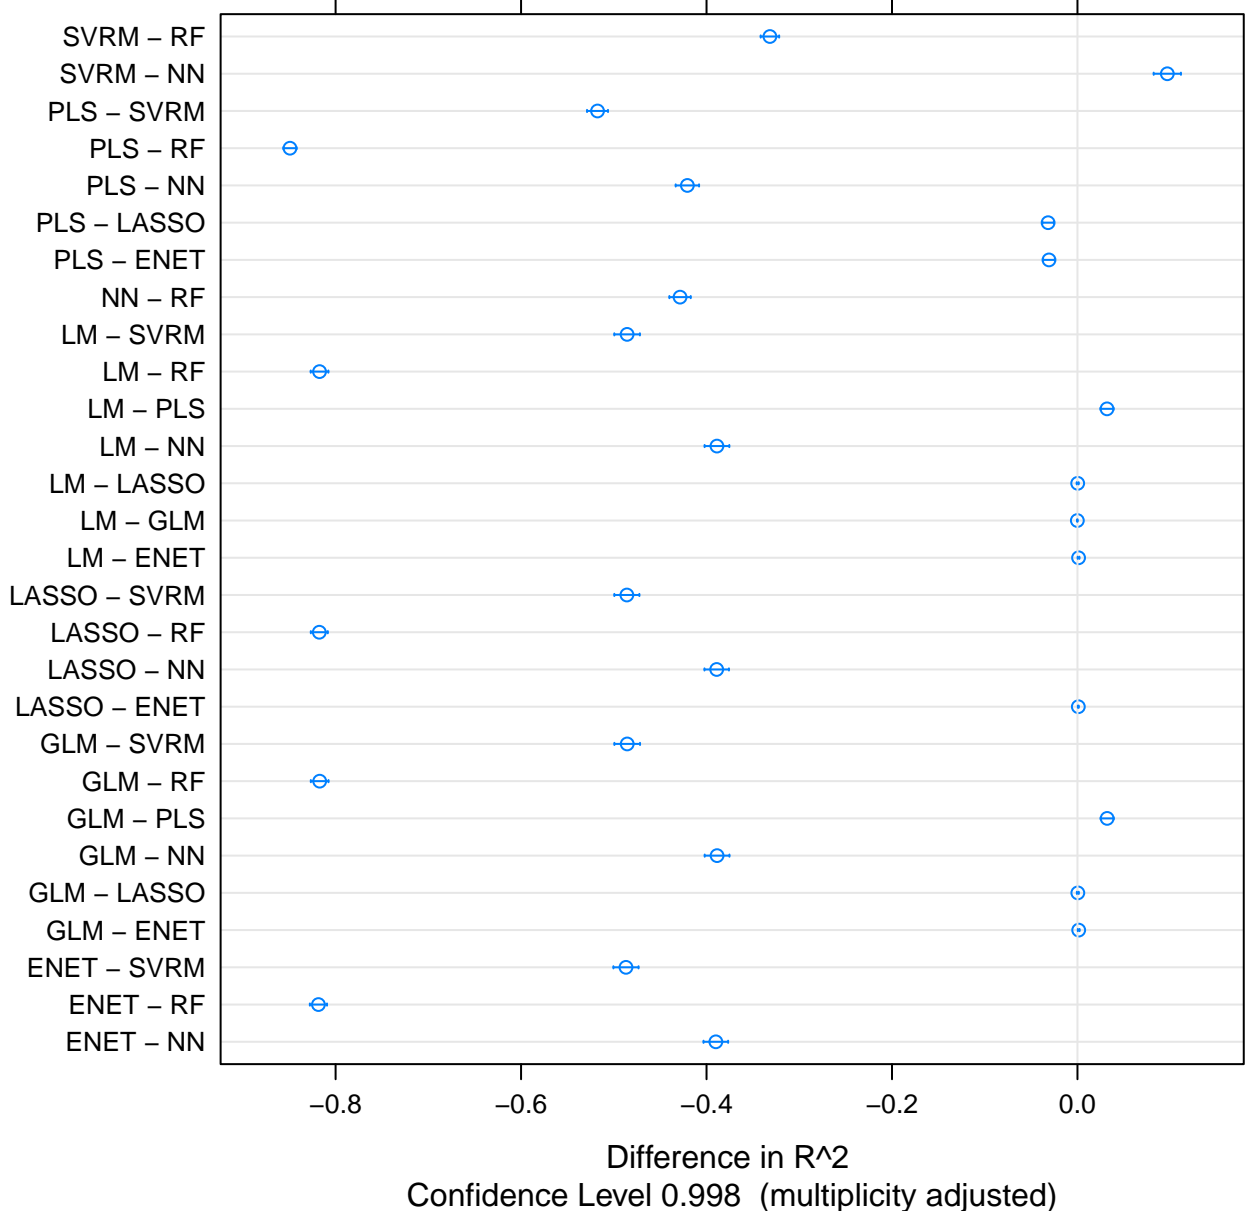

Supplement: rawData.zip [file rawData.zip]

# Models' differences on the training set (data split 6)

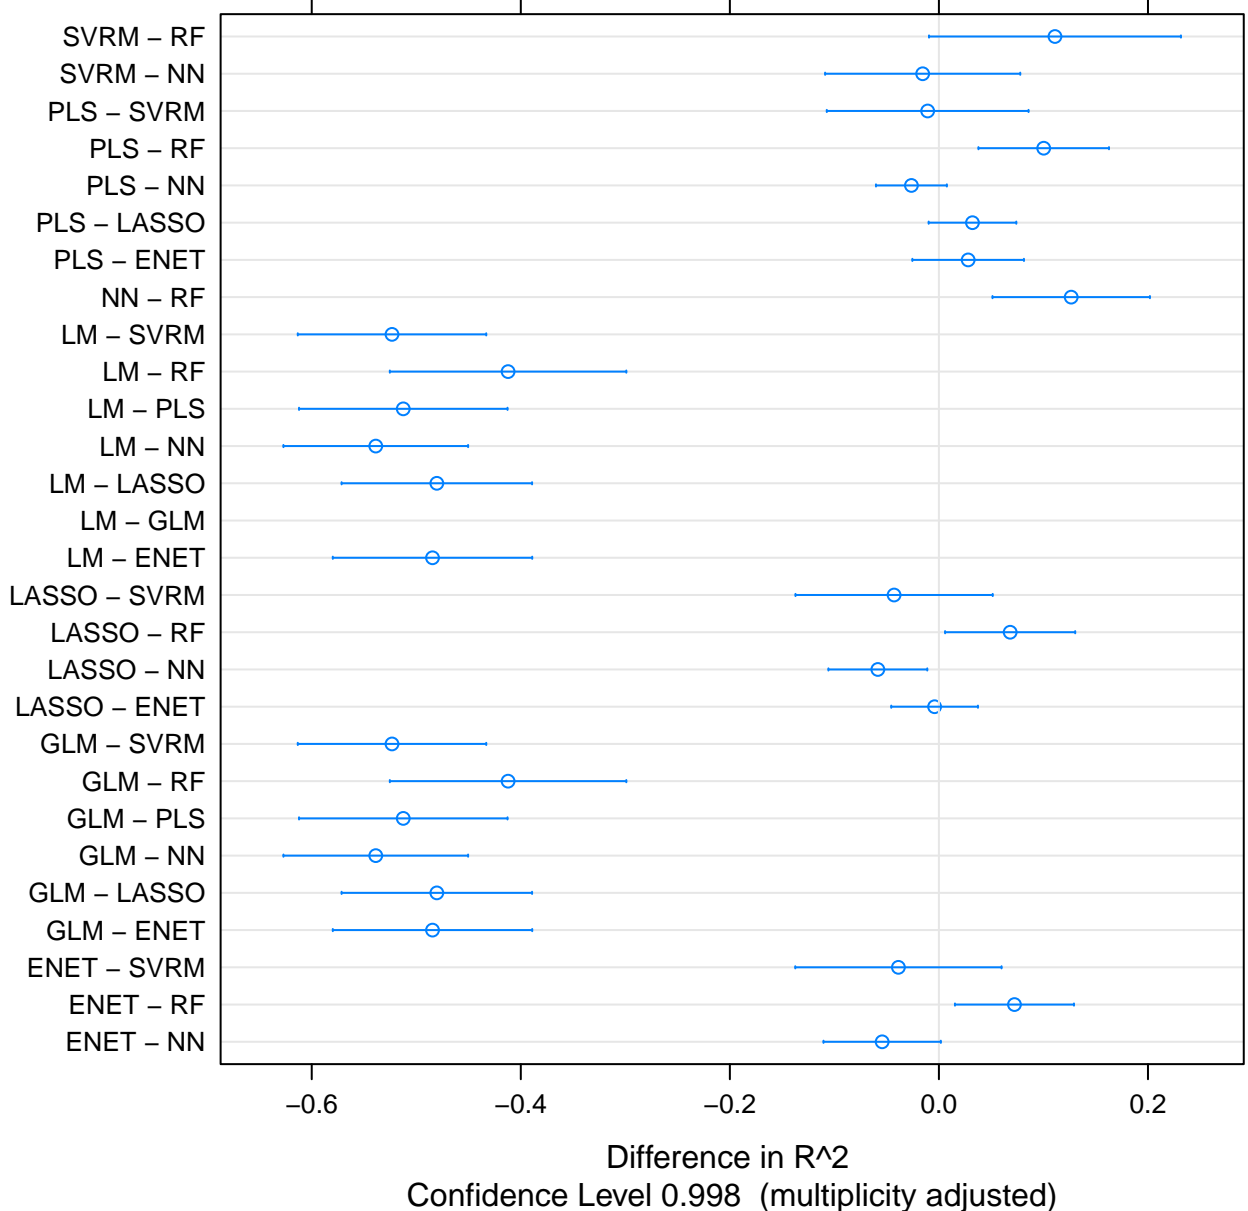

Supplement: rawData.zip [file rawData.zip]

# Models' differences on the training set (data split 4)

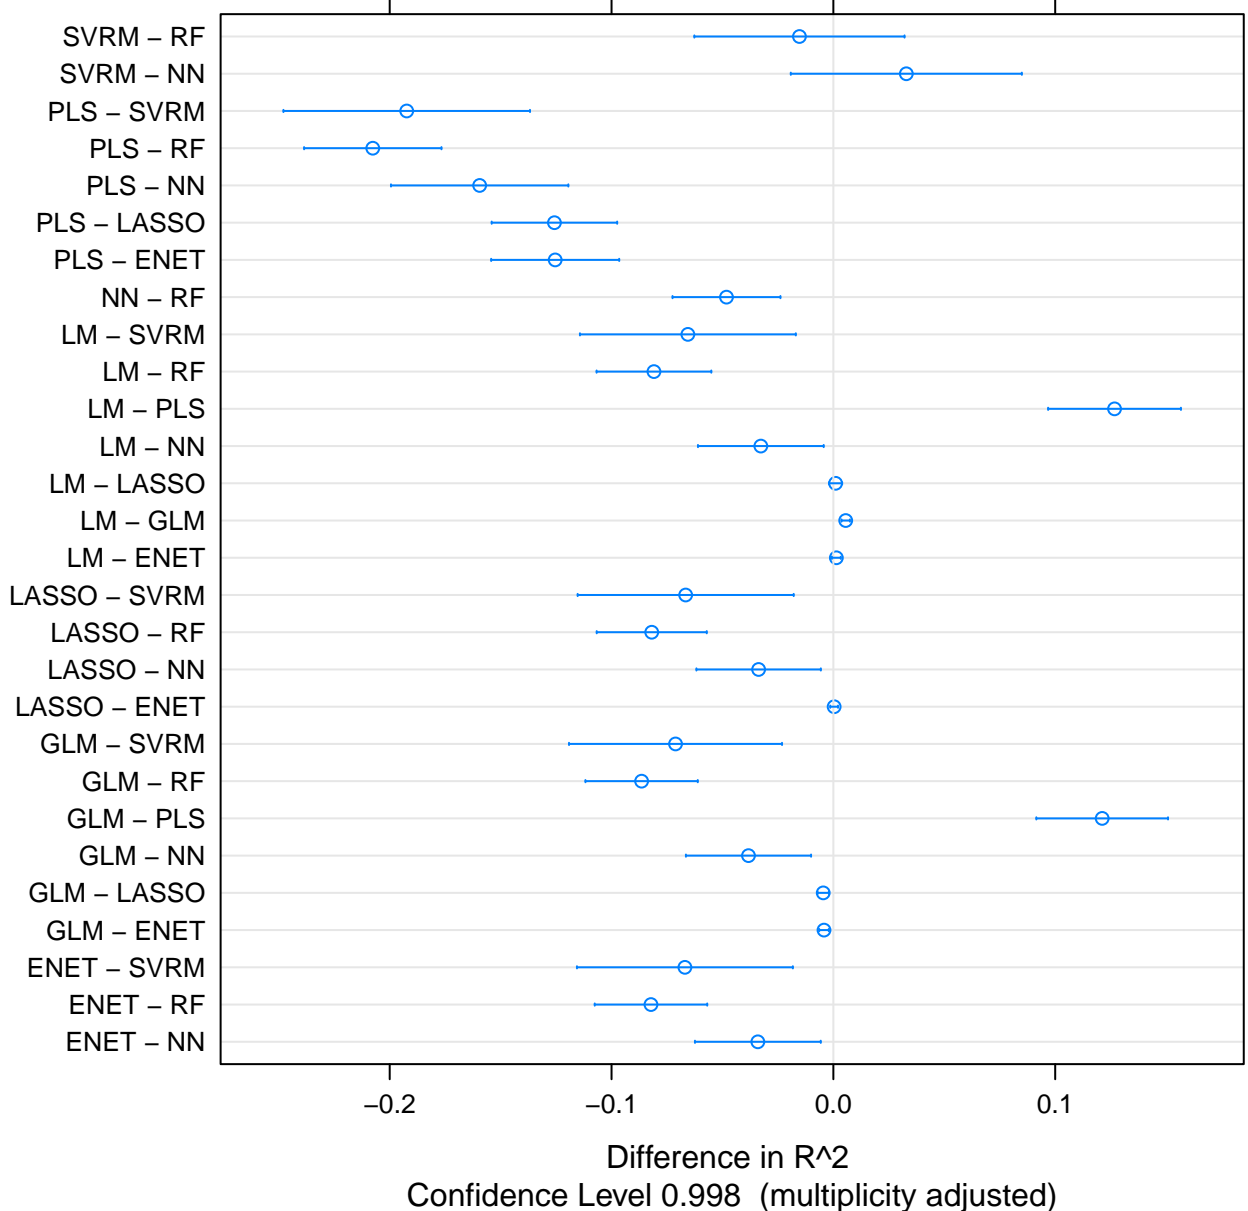

Supplement: rawData.zip [file rawData.zip]

# Models' differences on the training set (data split 8)

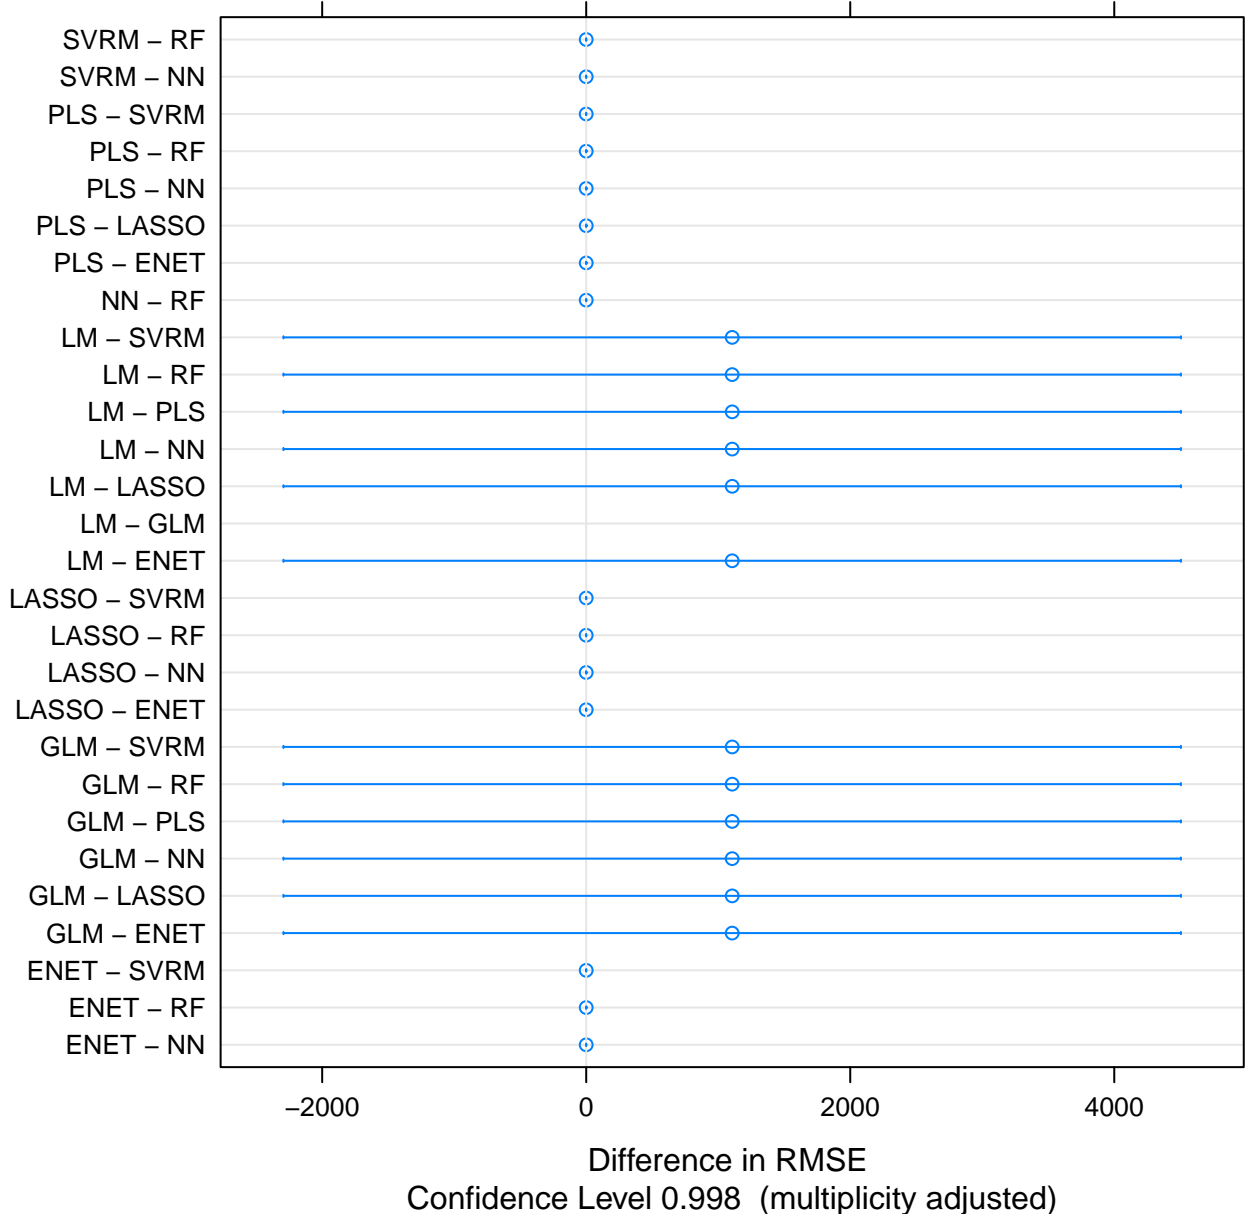

Supplement: rawData.zip [file rawData.zip]

# Resampling results on the training set (data split 2)

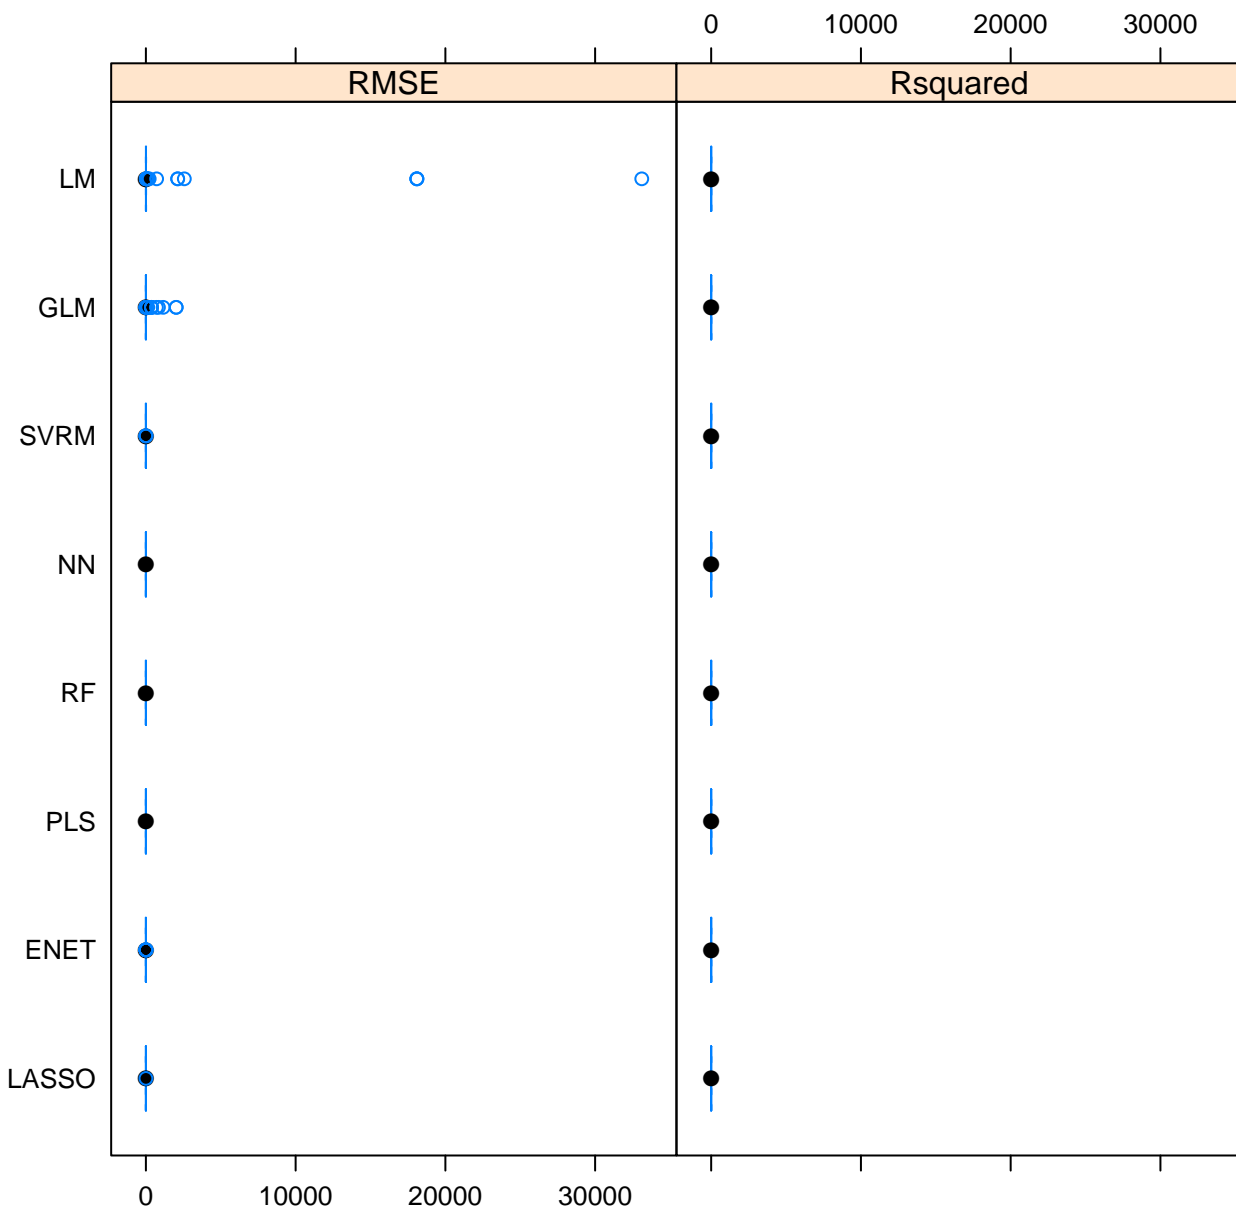

Supplement: rawData.zip [file rawData.zip]

# Models' differences on the training set (data split 9)

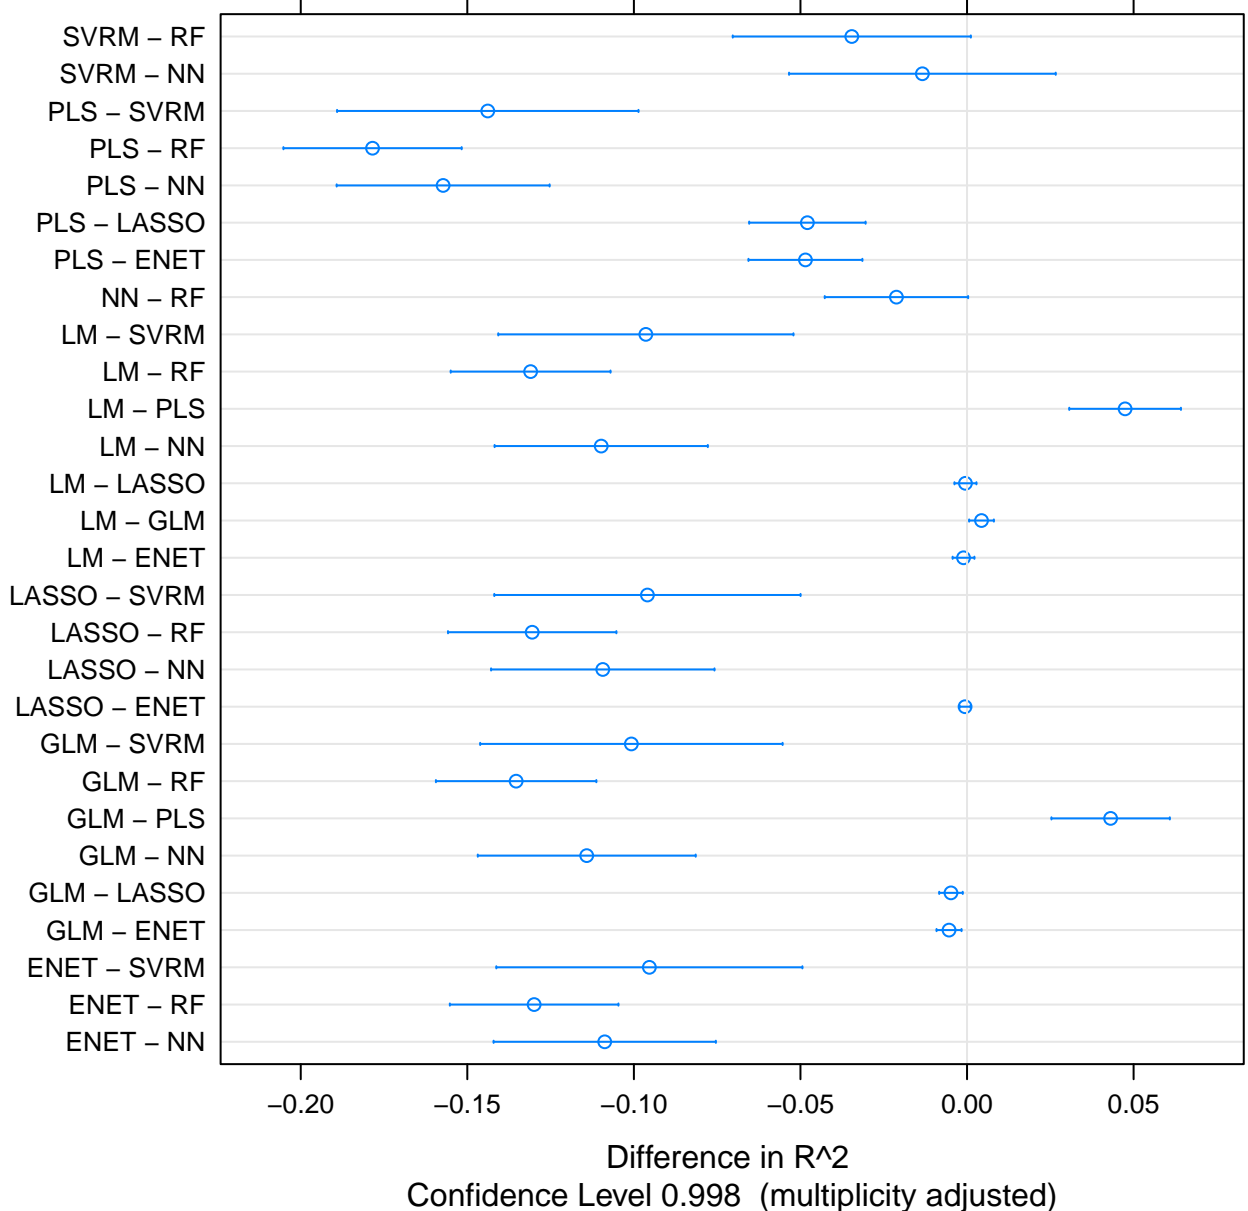

Supplement: rawData.zip [file rawData.zip]

Train Yobs-Ypred

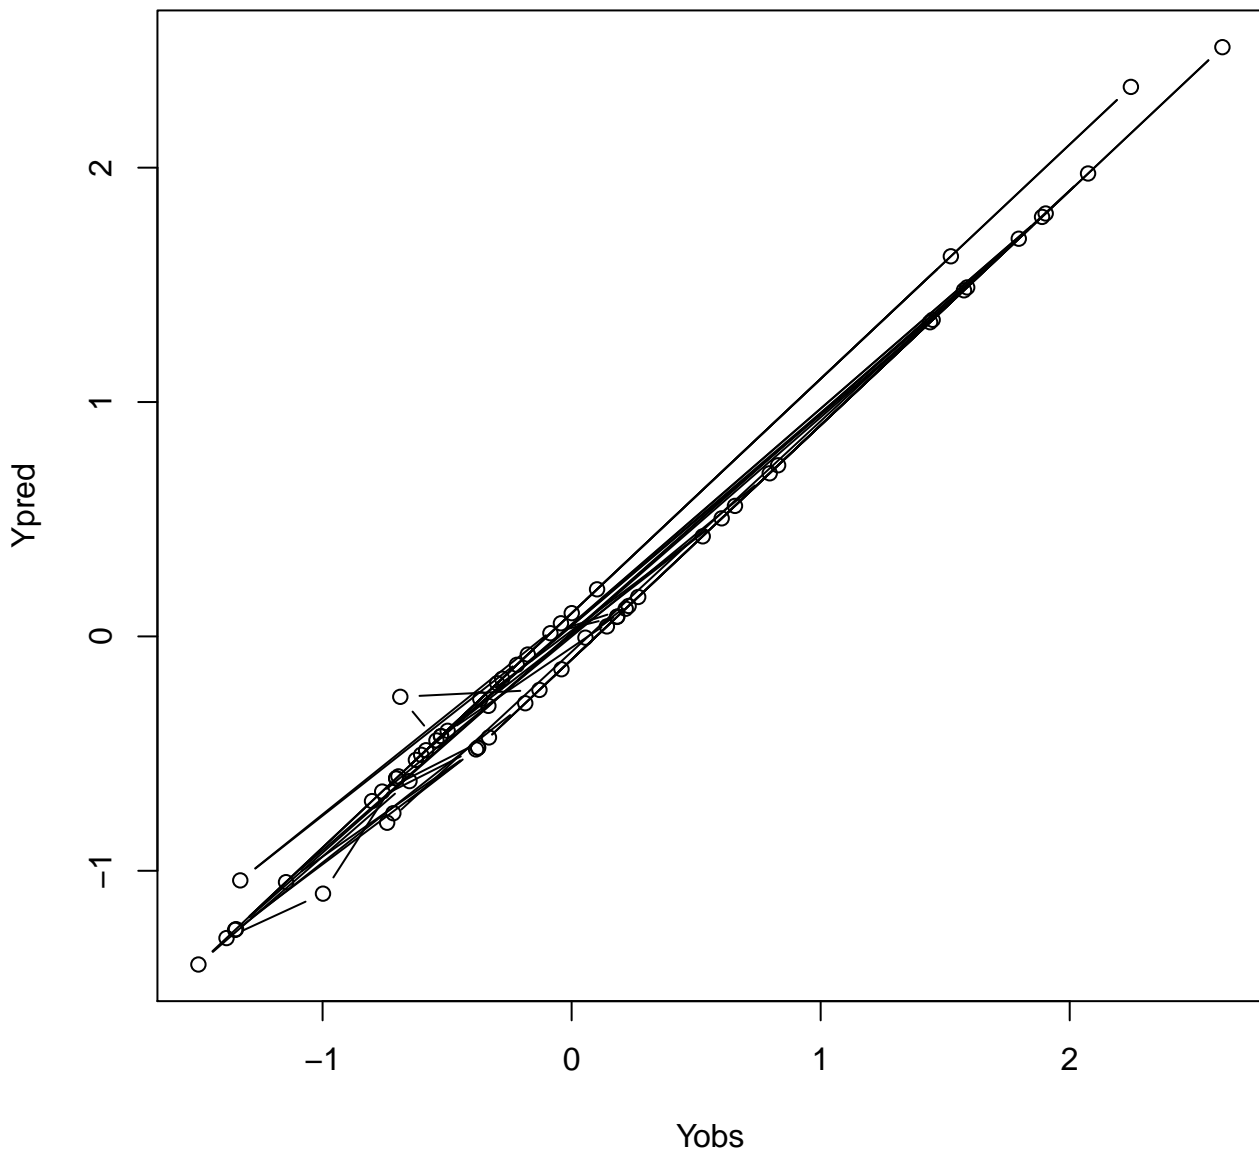

# Test Yobs-Ypred

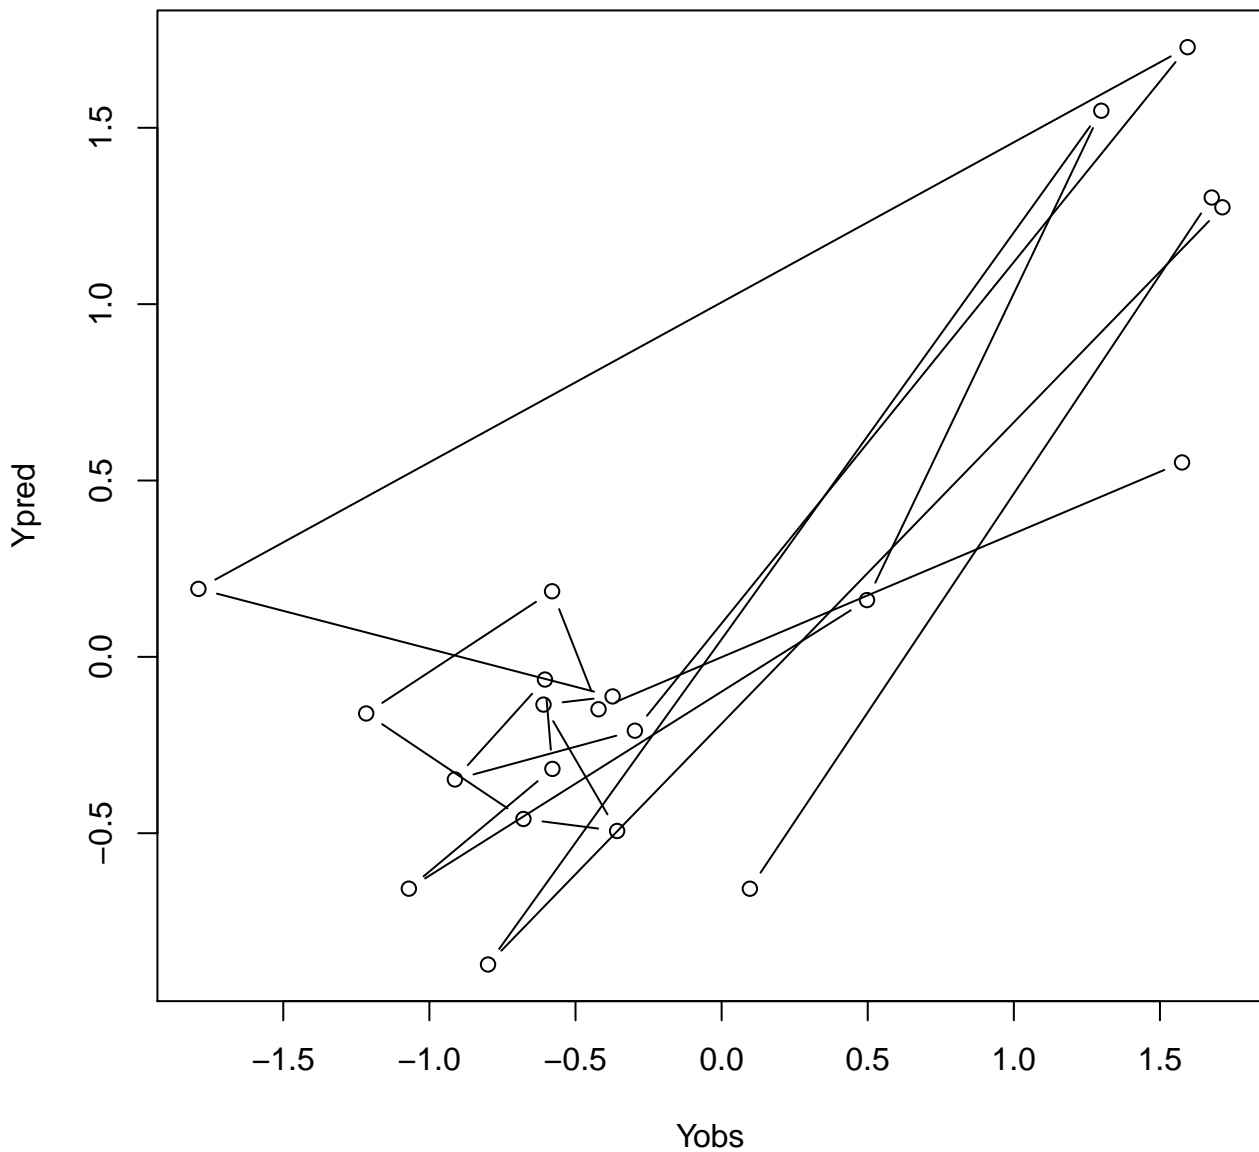

## Feature Importance

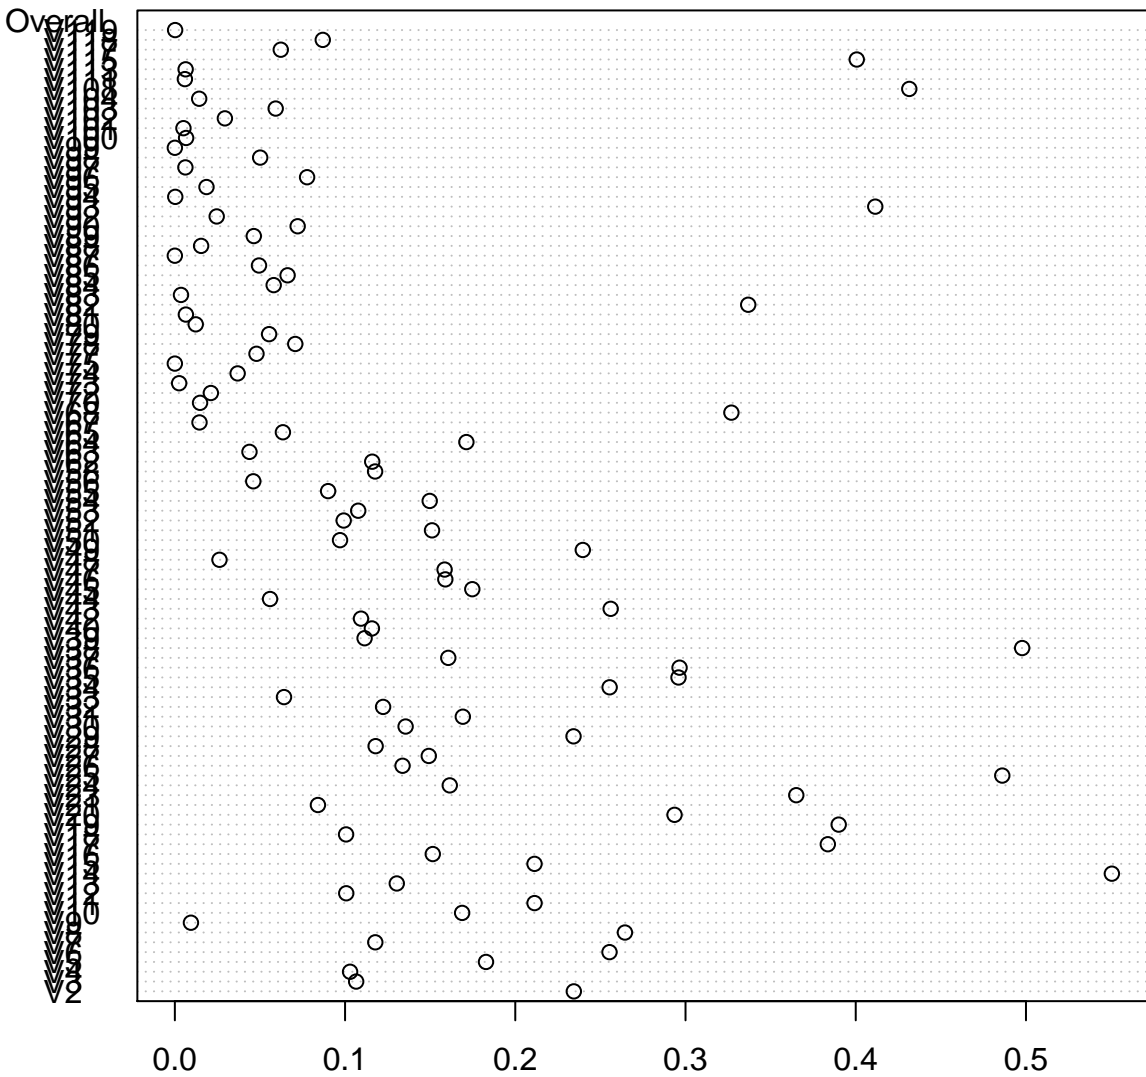

**Fitted vs. Residuals for Fitted Model**

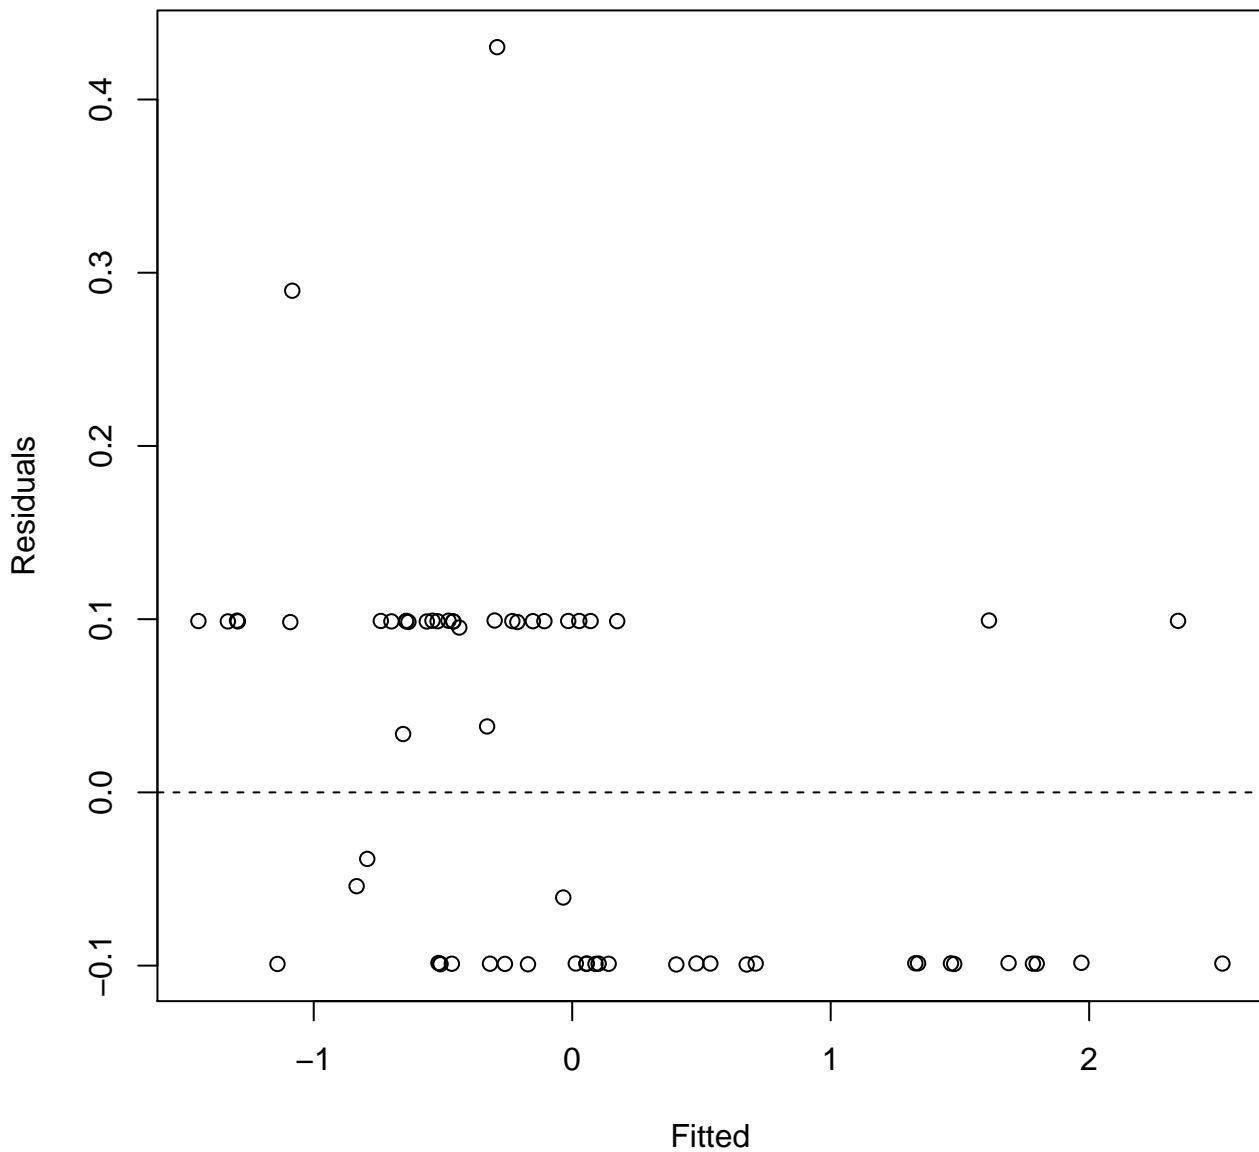

Supplement: rawData.zip [file rawData.zip]

**Train Yobs-Ypred**

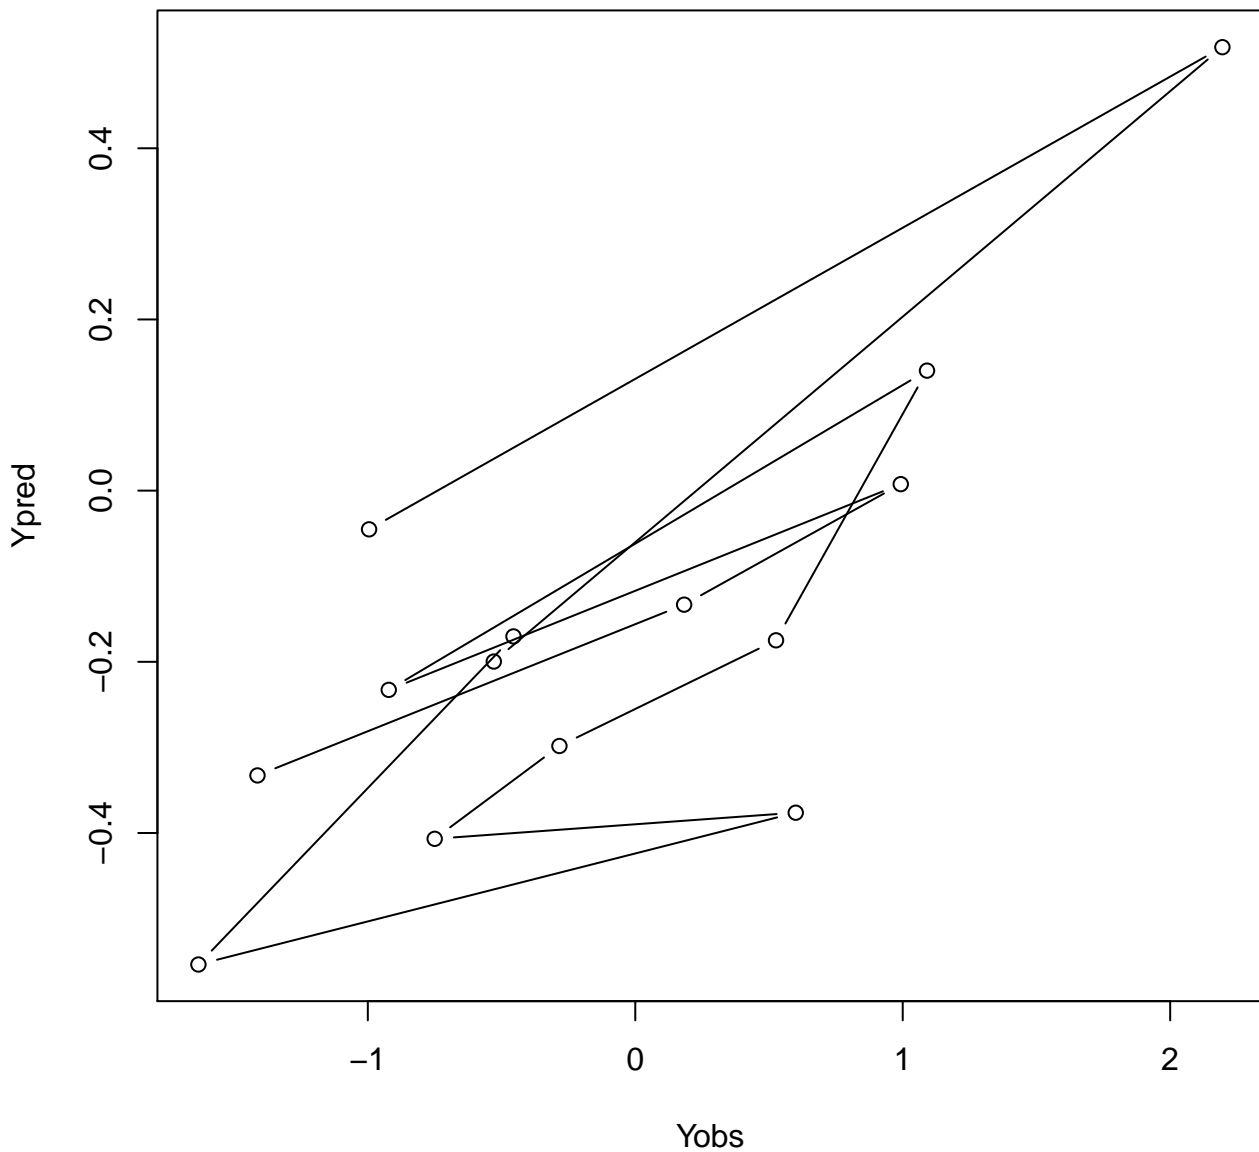

# Test Yobs-Ypred

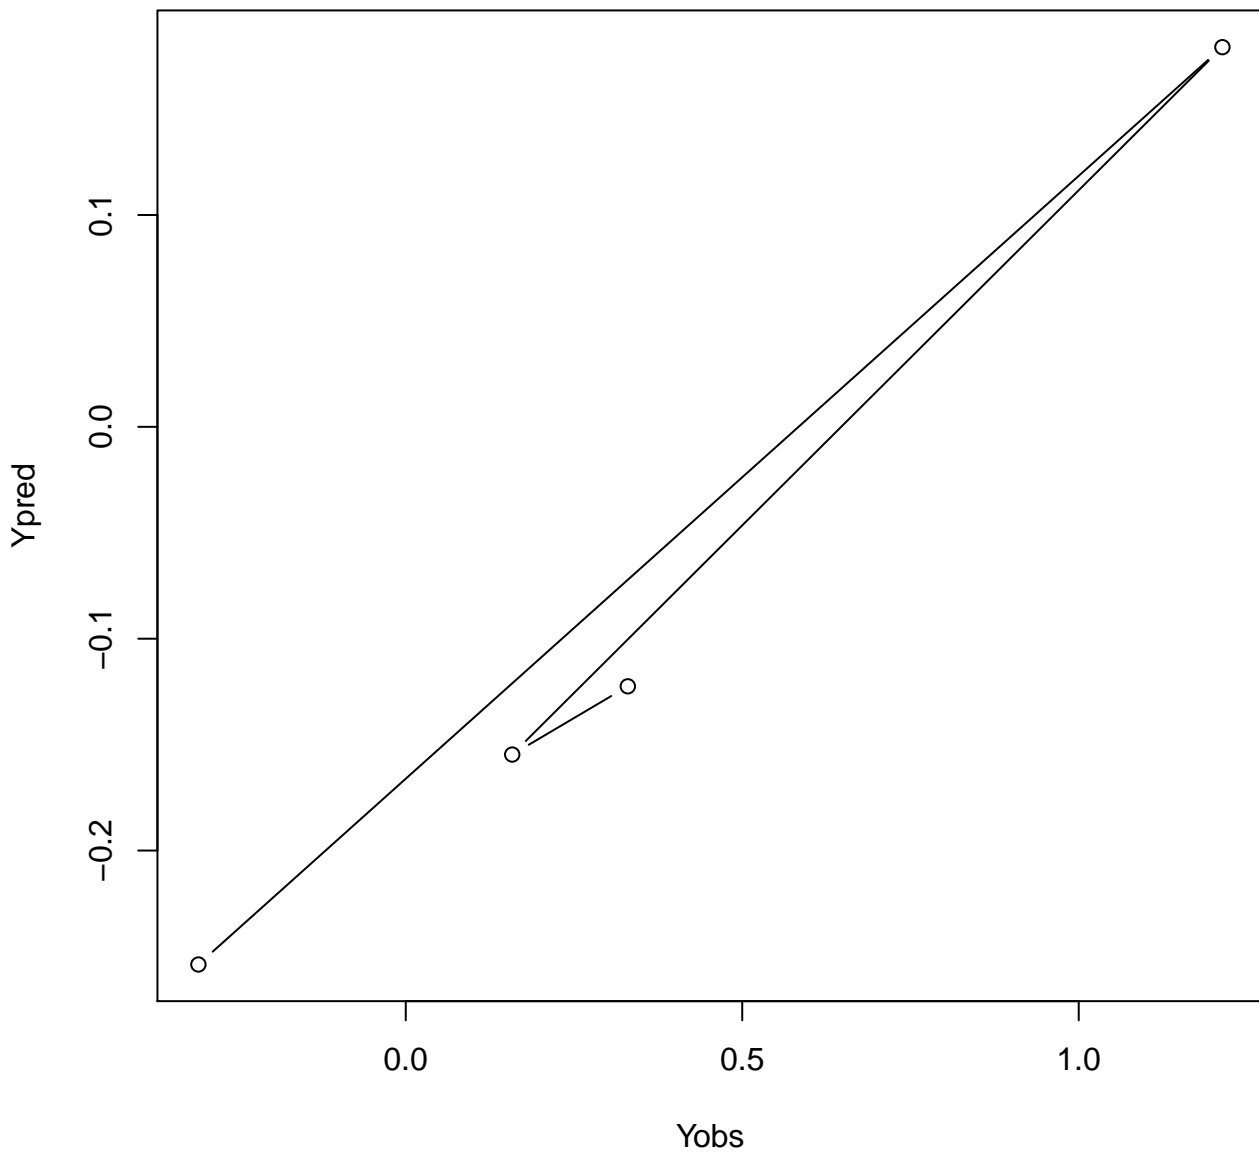

# Feature Importance

1

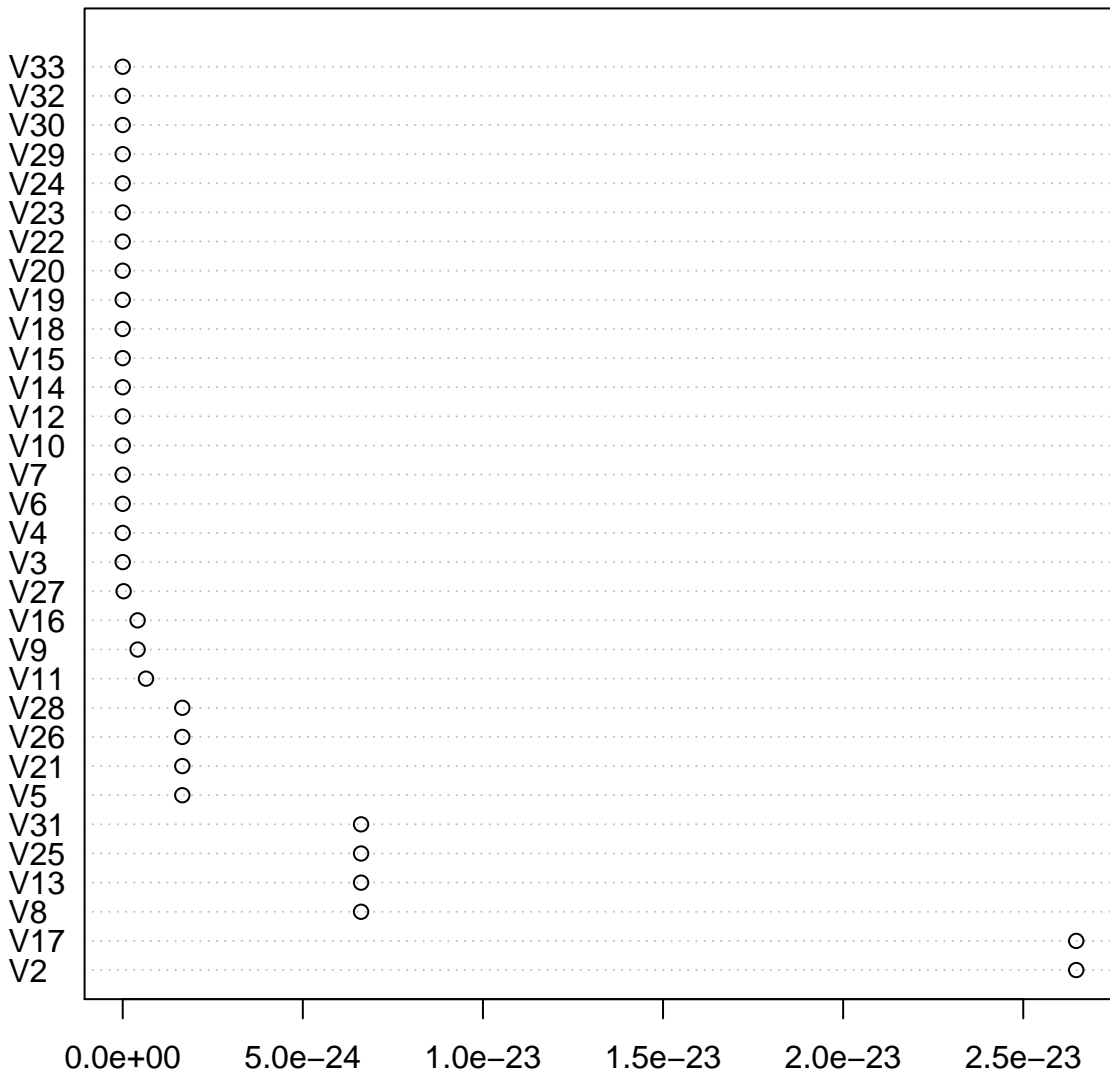

**Fitted vs. Residuals for Fitted Model**

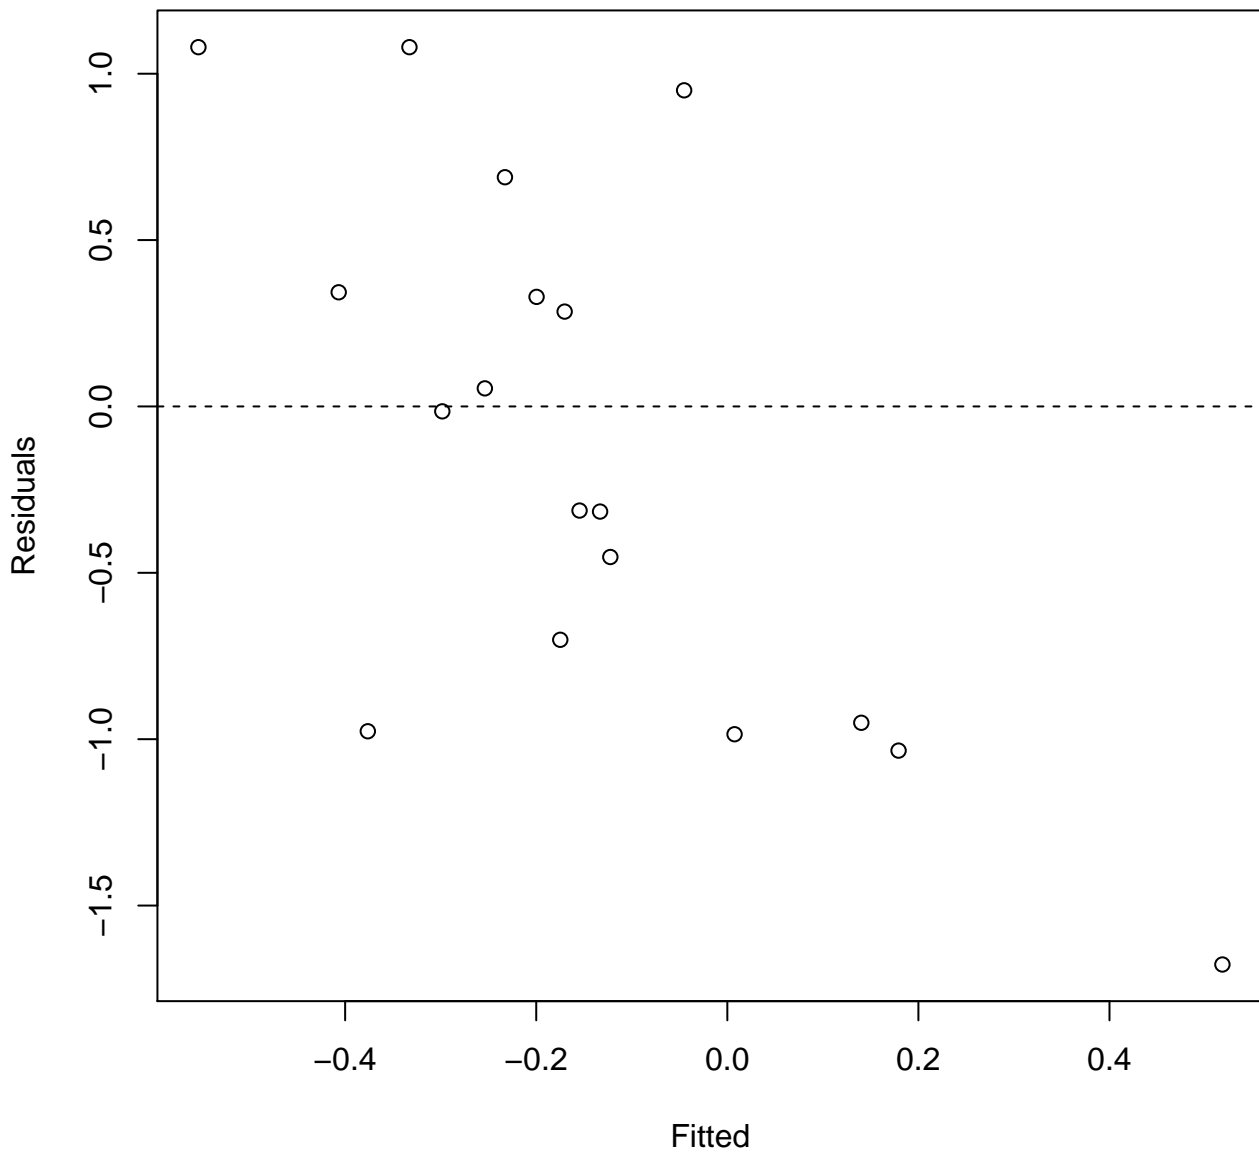

Supplement: rawData.zip [file rawData.zip]

# Models' differences on the training set (data split 7)

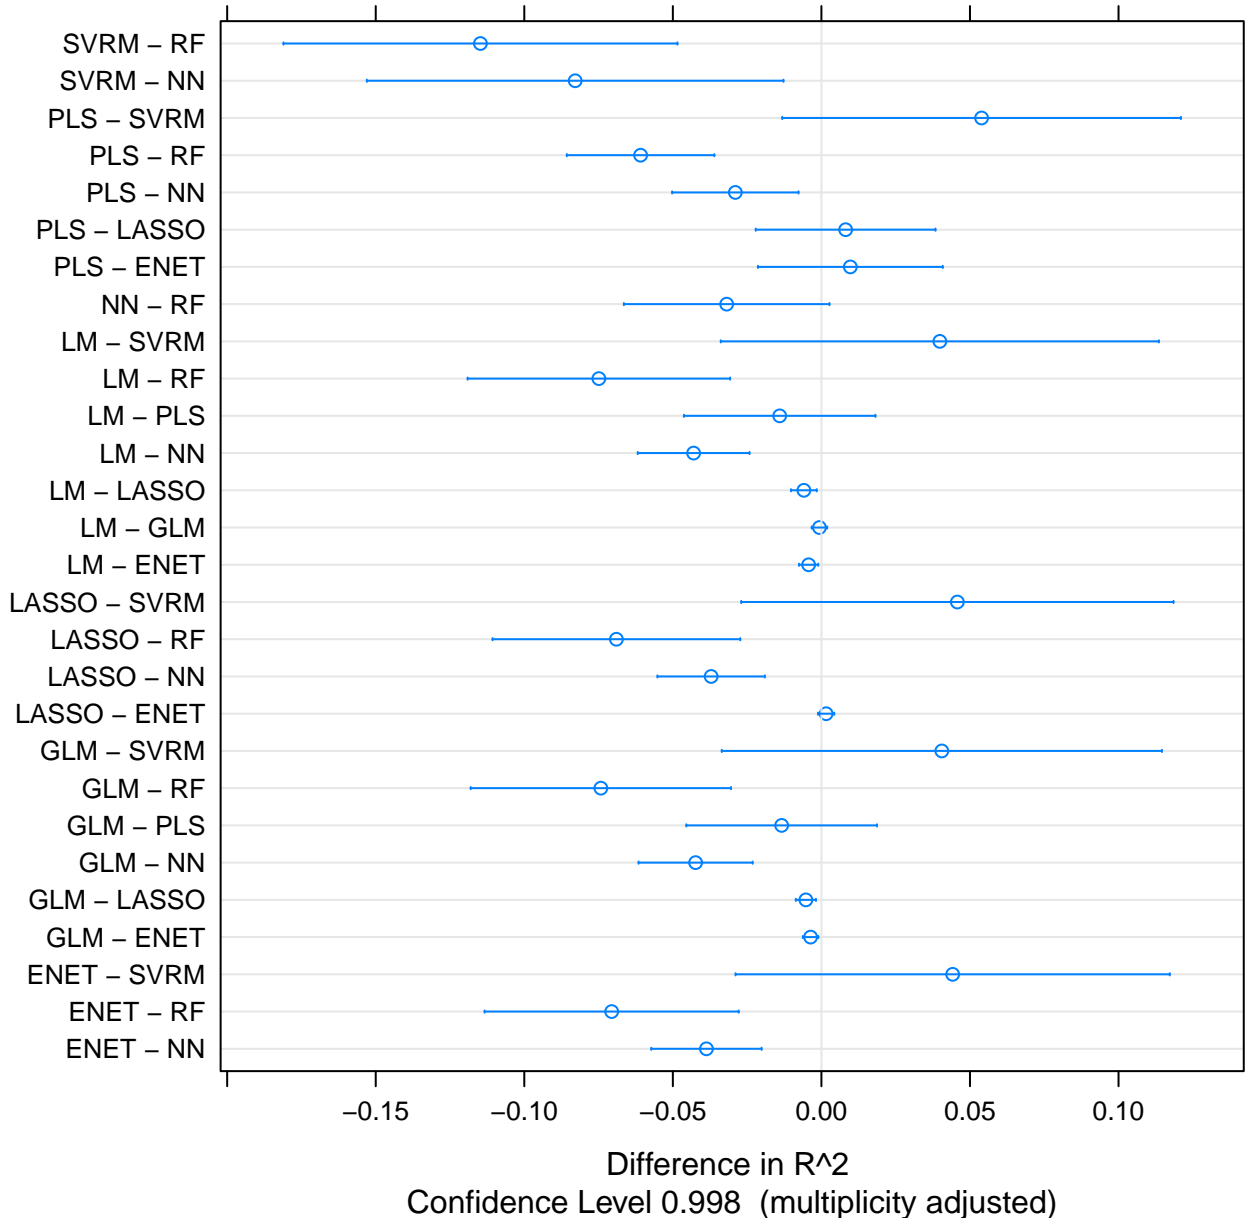

Supplement: rawData.zip [file rawData.zip]

# Resampling results on the training set (data split 1)

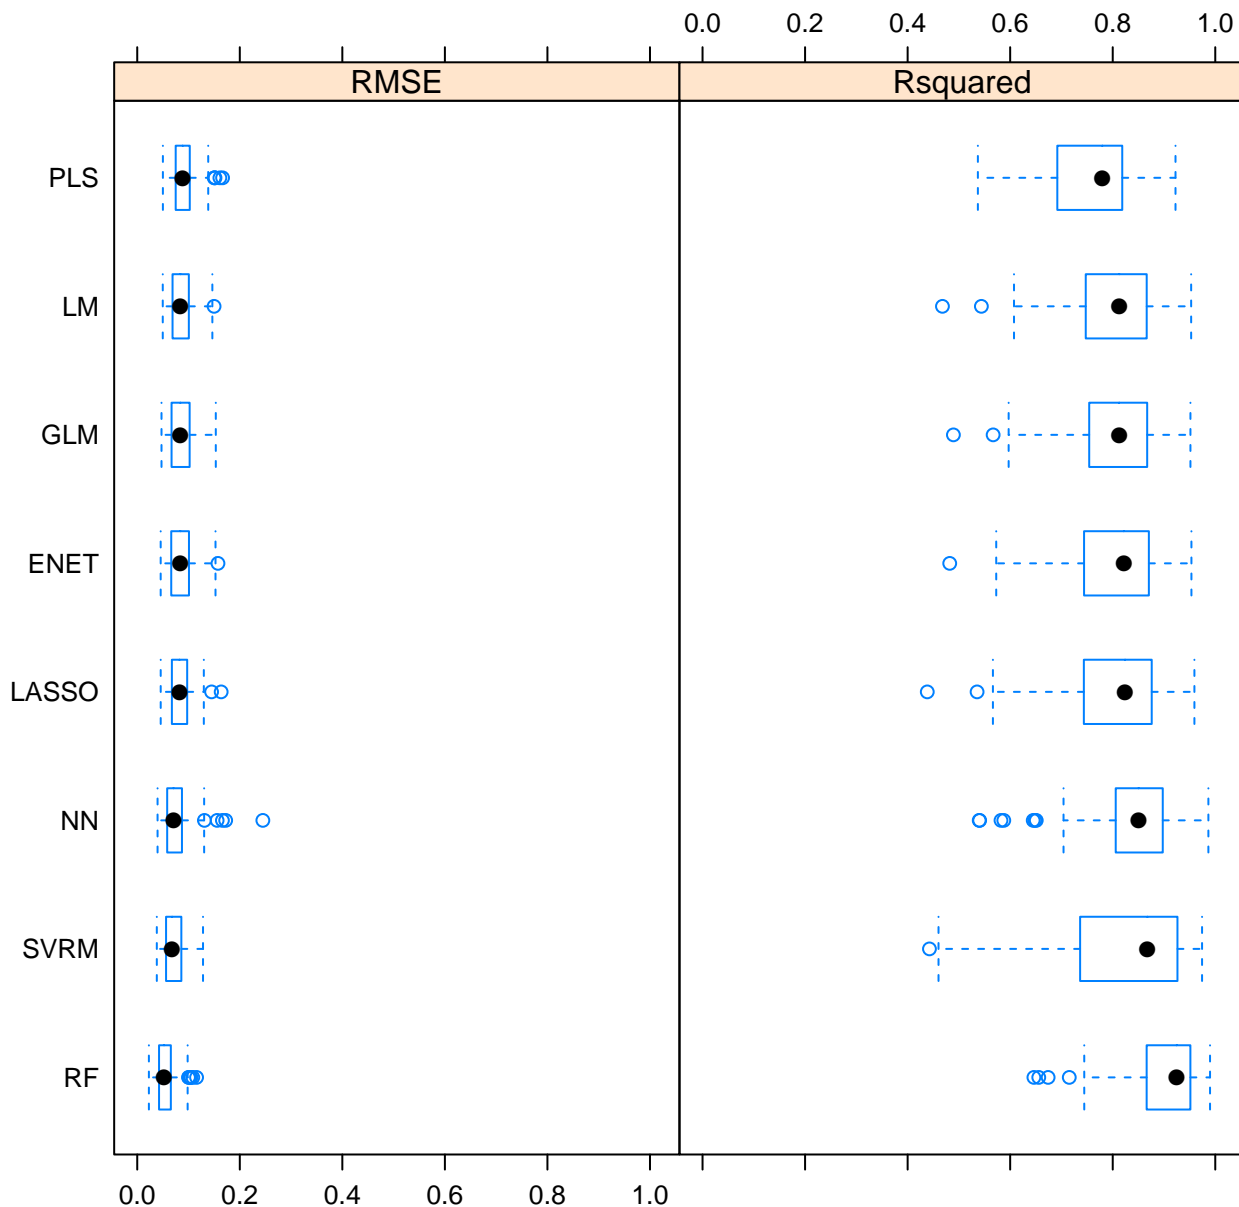

Supplement: rawData.zip [file rawData.zip]
